# Supplementary material
Source: PubMed Central journal article supplement (PMC3811587)
Supplement: JB.00839-13_zjb999092892so1.pdf [file JB.00839-13_zjb999092892so1.pdf]

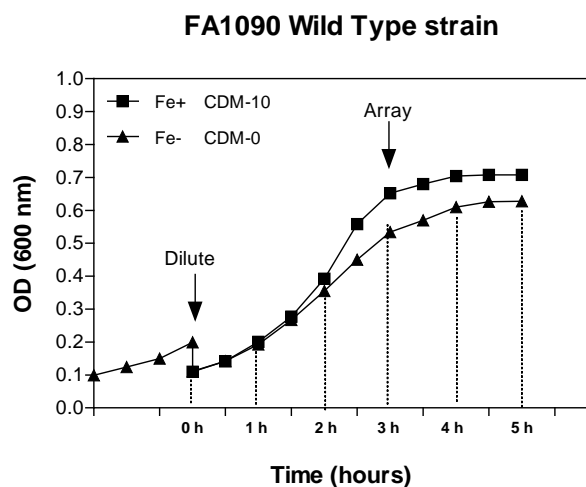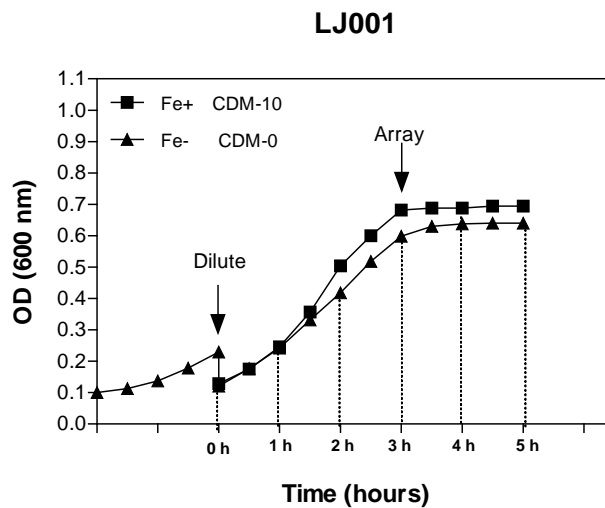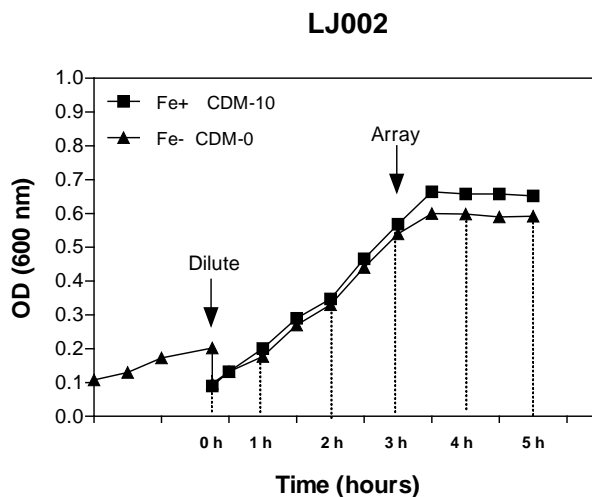

**Fig. S1.** Growth curves for FA1090, *nrrF* deletion mutant (LJ001) and complemented mutant strain (LJ002). Cells from overnight growth on GCB agar were inoculated into Fe-depleted medium (CDM-0) to  $OD_{600} = 0.1$  and then grown to  $OD_{600} = 0.2$  to iron starve the cells. At this point, denoted as 0h, the cells were split into two flasks and fresh CDM-0 added. Ferrous iron was added to one flask at  $10 \mu\text{M}$  (CDM-10). Cells were harvested at 3 hours for array studies. Growth curves are representative of 3 separate experiments.

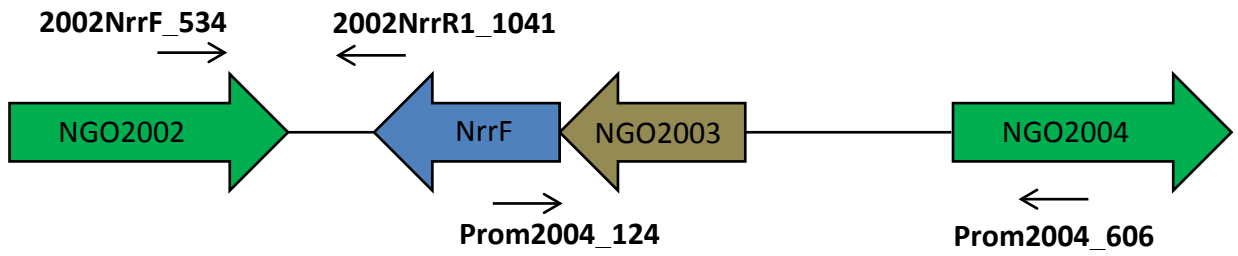

+

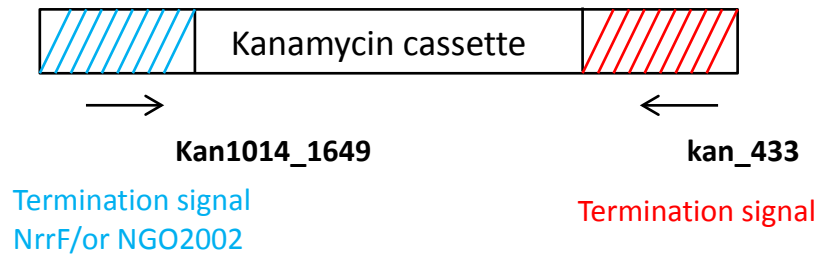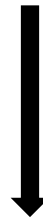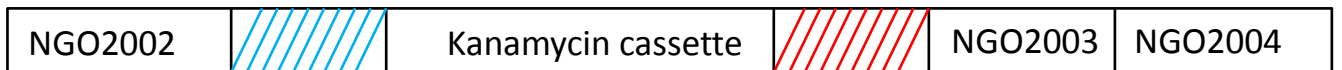

DNA fragment transformed into FA1090

## Primers and template used in *nrrF* deletion mutant construction

| Primers       | Amplicon                | Sequence                                              | Comments                                                       | Template |
|---------------|-------------------------|-------------------------------------------------------|----------------------------------------------------------------|----------|
| 2002NrrF_534  | NGO2002                 | aggcaagcctcacgatggac                                  |                                                                | FA1090   |
| 2002NrrF_1041 |                         | ggtttggcgtttttggctgcac                                | overlapping<br>in blue                                         |          |
| Kan1014_1649  | Kanamycin cassette      | ccaaaaacgccaaccggggaaagccacgttg                       | overlapping<br>in blue                                         | pUC4k    |
| Kan_433       |                         | <i>ctgaactcaagcttcg</i> gacggcattttgcgctgaggtctgcctcg | Overlapping<br>in pink;<br>termination<br>signal in<br>italics |          |
| Prom2004_124  | Fur<br>box/NGO2003/2004 | <i>cgaagcttgagttcag</i> acggcattttgtttgattatacgctaata | Overlapping<br>in pink;<br>termination<br>signal in<br>italics | FA1090   |
| Prom2004_606  |                         | gctttgtcgtgaggaacagg                                  |                                                                |          |

**Fig. S2 *nrrF* deletion mutant construction**

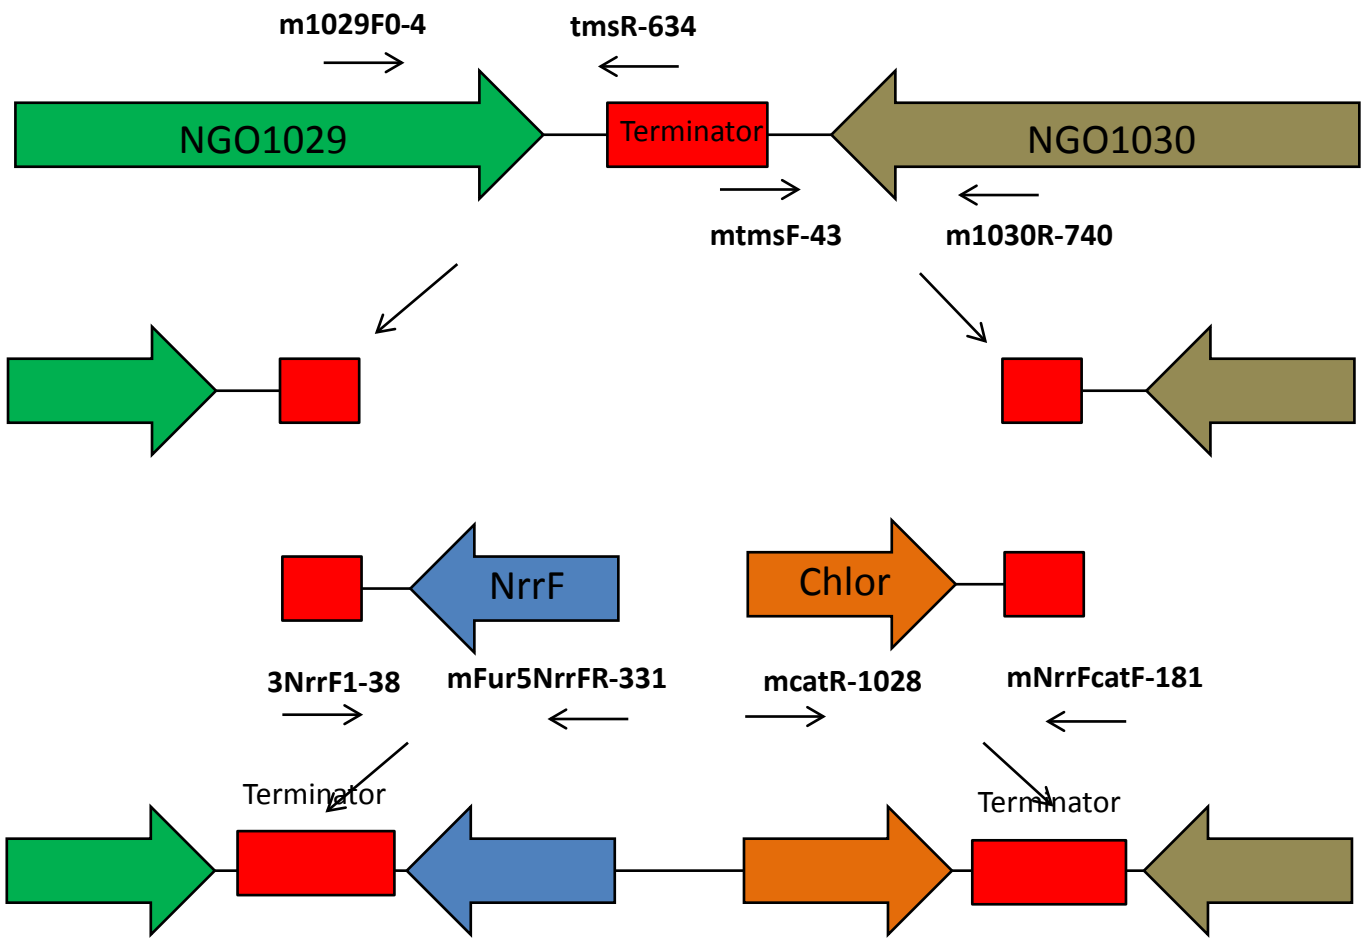

DNA fragment transformed into FA1090

## Primers and templates used in nrrF complemented strain construction

| Primers        | Amplicon                   | Sequence                                            | Comments             | Template           |
|----------------|----------------------------|-----------------------------------------------------|----------------------|--------------------|
| m1029F004      | NGO1029/termination signal | ttgccgcttcgggcgcatgaa                               |                      | FA1090             |
| tmsR-634       |                            | <b>gctagttcgaggcaac</b> ggaa                        | overlapping in blue  |                    |
| 3NrrF1-38      | NrrF/Fur box               | <b>ttgcctgcgaactagc</b> cctcaagtcttgcaaataagtcagacc | overlapping in blue  | FA1090             |
| mFur5NrrFR-331 |                            | <b>cctgcagcaacatcggcggac</b> aggtt                  | Overlapping in pink  |                    |
| mNrrFcatF-181  | Chloramphenicol cassette   | <b>gtccgccgatgttgctgcaggcg</b> cagaactg             | Overlapping in pink  | pGCC5 <sup>a</sup> |
| mcatR-1028     |                            | <b>gatgaaccatatacggtagcaacc</b> aggcgtttaagggcac    | Overlapping in green |                    |
| mtmsF-43       | Termination signal/NGO1030 | <b>gttgctaccgatatggttcac</b> cgcgcta                | Overlapping in green | FA1090             |
| m1030R-740     |                            | ggcagatttcgccgttacga                                |                      |                    |

<sup>a</sup> Wiehr IJ, Seifert HS (1997) Random shuttle mutagenesis: gonococcal mutants deficient in pilin antigenic variation. Molecular Microbiology 23: 1121-1131.

## Fig. S3 complemented mutant strain construction

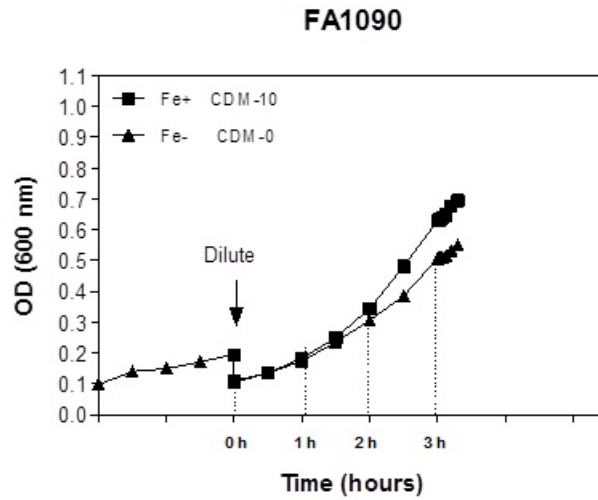

**Fig. S4.** Rifampin studies: Cells were grown to 3hrs in iron-deplete and –replete conditions. Rifampin was added to stop transcription at a final concentration of 200ug/ml and RNA isolated at 0, 2, 4, 8, 12, and 20 minutes. Growth was terminated immediately following addition of rifampin. Similar results were seen for *nrrF* mutant strain

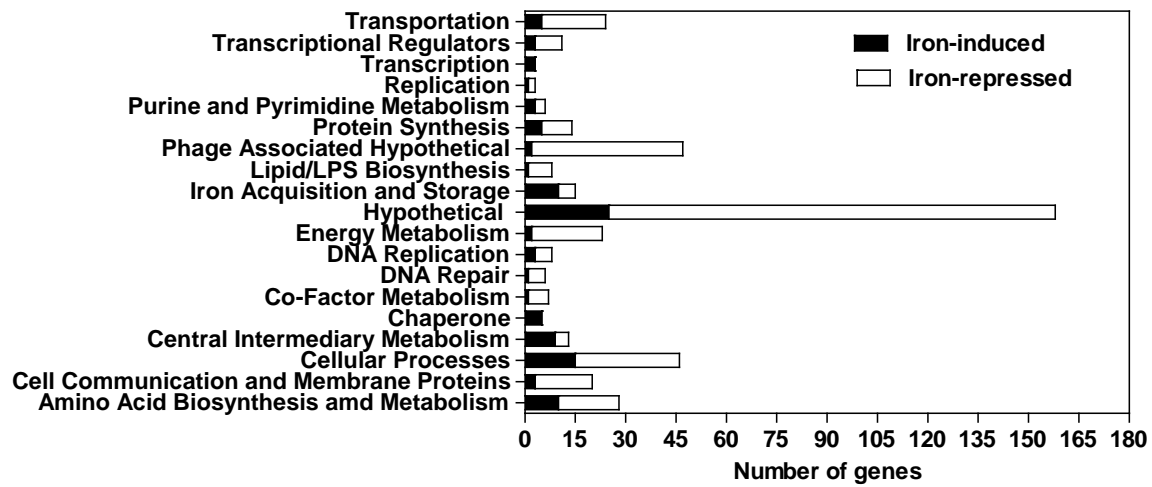

**Fig. S5.** Biological categories of Fe-repressed and –induced genes in the *nrrF* mutant. Normalized gene expression changes at 3 hours in Fe<sup>-</sup> vs. Fe<sup>+</sup> growth conditions that were 1.5-fold or greater and having a P value of  $\leq 0.05$  were categorized according to biological function. Bars represent the actual number of genes.

**Table S1.** Primers used in this study

|                                           | Forward (5' to 3')        | Reverse (5' to 3')       |
|-------------------------------------------|---------------------------|--------------------------|
| <b><u>qRTPCR and Rifampin Studies</u></b> |                           |                          |
| NGO0224                                   | AAGGATTTTGGCAGTCGGTAAC    | CGTTTGGGCGACGGTTT        |
| NGO0588                                   | CGCGATGCGCGTTG            | CGACCTGATGAACGCTCGTA     |
| NGO0797                                   | GCGTGGCGGCGTATCA          | ATCGGCGGAATTGGTCATC      |
| NGO0802                                   | AAAGGCGTATCCCTTCAAACAA    | CGGTATCGGGTTCGGTTTC      |
| NGO0920                                   | CTGCCGCGAAGGGATTT         | CCGTTTTTGGCCGTTGATGT     |
| NGO0921                                   | GCGGTAACCGCCATGGA         | GGCCTTGGCGTGGAATA        |
| NGO0922                                   | CRACTGCGGTTATTATGTTGATTTA | AGGCAGGGCAAATAGAACCA     |
| NGO0923                                   | CAGTATTCAGCTCAAGGCCTTTG   | TCGCCGGTATCCGCTTT        |
| NGO1024                                   | TGCCCGATGCGATTGTAGT       | AACGGTTGATGCACCCAAA      |
| NGO1368                                   | AGGCACGCTGATTTCTATGATGT   | TAAGGCGATCCATGCAATTAAGA  |
| NGO1446                                   | TTCTTTGGGCTTTGGAAGCTAT    | CACCGCCCCCATTGC          |
| NGO1561                                   | AGGCGCGTTCTATACCTGGTT     | CGATACGCAGGCCAGTTT       |
| NGO1861                                   | CGGATTTGTCGGGATTCG        | CACATCGTTAATCTGCAACACCAT |
| NGO2075                                   | CCACGCCGACCTGTTTAAA       | AAATCGATGAAGCCCGATACC    |
| NrrF                                      | TCCGTTCCGAACCATTAAA       | GCGTTTCGGTTTTGAGTATCT    |
| por1                                      | TGTCCGTACGCTACGATTCTCC    | AGCCAACGTGGTAAGATTTCGC   |
| <b><u>EMSA</u></b>                        |                           |                          |
| NrrF                                      | TGTTTATTTTTTCATCGCATTACA  | TGAATTGTGAGGGAATACAGTG   |
| NGO1809                                   | ATGGAAGAACAAGGCTCTATGTG   | TGTAACGTTTCATCTTCTGGATTG |
| NGO1779                                   | CAAATCGGGATGTCTAGTGT      | ACCATAGCAGTTCGCAATAG     |



Table S2\_FA1090\_nrrF mutant\_complemented nrrF mutant\_array fold changes\_3hr

| Locus Tag | p value | FA1090 Fe-/ Fe+ Fold Change | Regulation | p value | nrrF mutant Fe-/Fe+ Fold Change | Regulation | p value | Complemented mutant Fe-/Fe+ Fold Change | Regulation | Probe Comment                                                                                                                                                                                                                                                                                                                                                                                    |
|-----------|---------|-----------------------------|------------|---------|---------------------------------|------------|---------|-----------------------------------------|------------|--------------------------------------------------------------------------------------------------------------------------------------------------------------------------------------------------------------------------------------------------------------------------------------------------------------------------------------------------------------------------------------------------|
| NGO0001   | 0.6881  | -1.20                       | down       | 0.7369  | -1.16                           | down       | 0.6087  | -1.16                                   | down       | putative chromosomal replication protein (DnaA)\ Context:(NC_002946)+[159-1715]\ Notes:Best Blastp Hit: emb  CAB83845.1   (AL162753) putative chromosomal replication initiator protein [Neisseria meningitidis] COG0593 ATPase involved in DNA replication                                                                                                                                      |
| NGO0002   | 0.1894  | 1.95                        | up         | 0.2868  | 1.47                            | up         | 0.4484  | 1.28                                    | up         | DNA polymerase III subunit beta\ Context:(NC_002946)+[1795-2898]\ Notes:binds the polymerase to DNA and acts as a sliding clamp                                                                                                                                                                                                                                                                  |
| NGO0003   | 0.5506  | 1.42                        | up         | 0.4724  | 1.74                            | up         | 0.0106  | 3.57                                    | up         | polyphosphate kinase\ Context:(NC_002946)-[3047-5104]\ Notes:catalyzes the reversible transfer of the terminal phosphate of ATP to form a long chain polyphosphate                                                                                                                                                                                                                               |
| NGO0004   | 0.1265  | -2.43                       | down       | 0.6638  | -1.32                           | down       | 0.9466  | -1.04                                   | down       | hypothetical protein\ Context:(NC_002946)-[5273-5716]\ Notes:Best Blastp Hit: pir     D81974 probable periplasmic protein NMA0556 [imported] - Neisseria meningitidis (group A strain Z2491) >gi  7379295   emb  CAB83849.1   (AL162753) putative periplasmic protein [Neisseria meningitidis]                                                                                                   |
| NGO0006   | 0.5894  | 1.29                        | up         | 0.2296  | 2.04                            | up         | 0.2264  | 2.06                                    | up         | leucyl-tRNA synthetase\ Context:(NC_002946)+[6500-9136]\ Notes:leucine--tRNA ligase; LeuRS; class-I aminoacyl-tRNA synthetase; charges leucine by linking carboxyl group to alpha-phosphate of ATP and then transfers aminoacyl-adenylate to its tRNA; due to the large number of codons that tRNA(Leu) recognizes; the leucyl-tRNA synthetase does not recognize the anticodon loop of the tRNA |

|         |        |       |      |        |       |      |        |       |      |                                                                                                                                                                                                                                                                                                                                                               |
|---------|--------|-------|------|--------|-------|------|--------|-------|------|---------------------------------------------------------------------------------------------------------------------------------------------------------------------------------------------------------------------------------------------------------------------------------------------------------------------------------------------------------------|
| NGO0007 | 0.8843 | 1.11  | up   | 0.8913 | -1.19 | down | 0.9083 | 1.14  | up   | putative type II restriction endonuclease\<br>Context:(NC_002946)+[9365-10294]\ Notes:Best Blastp Hit:<br>possibly phase variable - 8A residue homopolymer repeat in<br>the coding sequence (ON) COG0338 Site-specific DNA<br>methylase dam                                                                                                                   |
| NGO0008 | 0.3836 | 2.17  | up   | 0.8856 | 1.13  | up   | 0.3673 | -1.64 | down | putative modification methylase\<br>Context:(NC_002946)+[10394-11071]\ Notes:Best Blastp<br>Hit: sp P09358 MT22_STRPN modification methylase DpnII<br>2 (adenine-specific methyltransferase DpnII 2) (M.DPNII 2)<br>>gi 6978344 gb AAA88581.2  (M14339) DNA adenine<br>methyltransferase [Streptococcus pneumoniae] COG0863<br>Adenine-specific DNA methylase |
| NGO0009 | 0.0166 | -6.25 | down | 0.0476 | -4.50 | down | 0.0210 | -4.69 | down | hypothetical protein\<br>Context:(NC_002946)+[11091-<br>11546]\ Notes:Best Blastp Hit: sp P54298 LUXM_VIBHA<br>LUXM protein >gi 487037 pir   S37349 luxM protein -<br>Vibrio harveyi >gi 295433 gb AAC36807.1  (L13940) Lux<br>M [Vibrio harveyi]                                                                                                             |
| NGO0010 | 0.3343 | 2.28  | up   | 0.0273 | -3.09 | down | 0.3889 | -1.77 | down | hypothetical protein\<br>Context:(NC_002946)-[12107-12307]\<br>Notes:Best Blastp Hit: gb AAF42226.1  (AE002539)<br>hypothetical protein [Neisseria meningitidis MC58]                                                                                                                                                                                         |
| NGO0011 | 0.1391 | -2.57 | down | 0.1249 | -2.47 | down | 0.0220 | -5.46 | down | hypothetical protein\<br>Context:(NC_002946)-[12417-12728]\<br>Notes:Best Blastp Hit: pir   B81975 probable DNA-binding<br>protein NMA0564 [imported] - Neisseria meningitidis<br>(group A strain Z2491) >gi 7379301 emb CAB83856.1 <br>(AL162753) putative DNA-binding protein [Neisseria<br>meningitidis]                                                   |
| NGO0015 | 0.1344 | 7.92  | up   | 0.6676 | -2.21 | down | 0.1836 | 12.12 | up   | hypothetical protein\<br>Context:(NC_002946)+[13341-<br>13625]\ Notes:Best Blastp Hit: emb CAB83858.1 <br>(AL162753) hypothetical protein NMA0567 [Neisseria<br>meningitidis]                                                                                                                                                                                 |

|         |        |       |      |        |        |      |        |       |      |                                                                                                                                                                                                                                                                                                                                                                                                                                                                             |
|---------|--------|-------|------|--------|--------|------|--------|-------|------|-----------------------------------------------------------------------------------------------------------------------------------------------------------------------------------------------------------------------------------------------------------------------------------------------------------------------------------------------------------------------------------------------------------------------------------------------------------------------------|
| NGO0016 | 0.5404 | 1.45  | up   | 0.5373 | 1.33   | up   | 0.5539 | 1.26  | up   | preprotein translocase subunit SecG\ Context:(NC_002946)-[14081-14431]\ Notes:SecG; Best Blastp Hit: pir     F81031 protein-export membrane protein SecG NMB1888 [imported] - Neisseria meningitidis (group B strain MD58; group A strain Z2491) >gi 7227147 gb AAF42222.1  (AE002538) protein-export membrane protein SecG [Neisseria meningitidis MC58] >gi 7379305 emb CAB83860.1  (AL162753) putative protein-export integral membrane protein [Neisseria meningitidis] |
| NGO0017 | 0.8487 | 1.10  | up   | 0.9342 | -1.04  | down | 0.3632 | -1.27 | down | triosephosphate isomerase\ Context:(NC_002946)-[14438-15211]\ Notes:Reversibly isomerizes the ketone sugar dihydroxyacetone phosphate to the aldehyde sugar glyceraldehyde-3-phosphate                                                                                                                                                                                                                                                                                      |
| NGO0018 | 0.1789 | -2.14 | down | 0.0752 | -2.20  | down | 0.1417 | -1.81 | down | hypothetical protein\ Context:(NC_002946)+[15370-15897]\ Notes:Best Blastp Hit: pir     H81975 hypothetical protein NMA0571 [imported] - Neisseria meningitidis (group A strain Z2491) >gi 7379307 emb CAB83862.1  (AL162753) hypothetical protein NMA0571 [Neisseria meningitidis] COG1956 GAF domain-containing proteins                                                                                                                                                  |
| NGO0019 | 0.1667 | -2.02 | down | 0.0964 | -2.28  | down | 0.2096 | -1.51 | down | putative protein-L-isoaspartate O-methyltransferase\ Context:(NC_002946)+[16000-16656]\ Notes:PimT; Best Blastp Hit: gb AAF42219.1  (AE002538) protein-L-isoaspartate O-methyltransferase [Neisseria meningitidis MC58]                                                                                                                                                                                                                                                     |
| NGO0020 | 0.1304 | -2.87 | down | 0.1519 | -5.22  | down | 0.0517 | -6.00 | down | hypothetical protein\ Context:(NC_002946)+[16737-17060]\ Notes:Best Blastp Hit: emb CAB83864.1  (AL162753) hypothetical protein NMA0573 [Neisseria meningitidis]                                                                                                                                                                                                                                                                                                            |
| NGO0021 | 0.0392 | -3.01 | down | 0.0135 | -11.85 | down | 0.1065 | 1.84  | up   | putative TonB-dependent receptor protein; iron related\ Context:(NC_002946)-[17323-19500]\ Notes:Best Blastp Hit: pir     D81976 probable ferric siderophore receptor protein NMA0575 [imported] - Neisseria meningitidis (group A strain Z2491) >gi 7379311 emb CAB83866.1  (AL162753) putative ferric siderophore receptor protein [Neisseria meningitidis] COG1629 Outer membrane receptor proteins; mostly Fe                                                           |

|         |        |       |      |        |        |      |        |       |      |                                                                                                                                                                                                                                                                                                                                        |
|---------|--------|-------|------|--------|--------|------|--------|-------|------|----------------------------------------------------------------------------------------------------------------------------------------------------------------------------------------------------------------------------------------------------------------------------------------------------------------------------------------|
| NGO0022 | 0.2977 | -2.02 | down | 0.3939 | -1.52  | down | 0.6600 | -1.46 | down | hypothetical protein\ Context:(NC_002946)-[19763-20086]\<br>Notes:Best Blastp Hit: pir   E81976 hypothetical protein<br>NMA0576 [imported] - Neisseria meningitidis (group A<br>strain Z2491) >gi 7379312 emb CAB83867.1  (AL162753)<br>hypothetical protein NMA0576 [Neisseria meningitidis]<br>COG0662 Mannose-6-phosphate isomerase |
| NGO0023 | 0.2246 | -2.59 | down | 0.0307 | -10.58 | down | 0.7581 | 1.44  | up   | putative ABC transporter; periplasmic binding protein;iron<br>related\ Context:(NC_002946)-[20119-21090]\ Notes:Best<br>Blastp Hit: gb AAF42214.1  (AE002538) ABC transporter;<br>periplasmic solute-binding protein; putative [Neisseria<br>meningitidis MC58] COG0614 Ferrichrome-binding<br>periplasmic proteins                    |
| NGO0024 | 0.0640 | -3.29 | down | 0.1070 | -3.92  | down | 0.9098 | -1.07 | down | hypothetical protein\ Context:(NC_002946)-[21087-21251]\<br>Notes:                                                                                                                                                                                                                                                                     |
| NGO0025 | 0.0645 | 6.88  | up   | 0.0443 | 3.77   | up   | 0.0073 | 9.10  | up   | AraC family transcriptional regulator\<br>Context:(NC_002946)+[21326-22282]\ Notes:Best Blastp<br>Hit: emb CAB83869.1  (AL162753) putative araC-family<br>transcriptional regulator [Neisseria meningitidis] COG2207<br>AraC-type DNA-binding domain-containing                                                                        |
| NGO0026 | 0.0068 | 6.86  | up   | 0.1685 | 4.16   | up   | 0.9420 | -1.04 | down | putative prolyl endopeptidase\ Context:(NC_002946)-<br>[22395-24410]\ Notes:Best Blastp Hit: emb CAB83870.1 <br>(AL162753) putative prolyl endopeptidase [Neisseria<br>meningitidis] COG1505 Serine proteases of the peptidase<br>family                                                                                               |
| NGO0027 | 0.2161 | 1.89  | up   | 0.9920 | 1.01   | up   | 0.2019 | 2.96  | up   | N-acetylglutamate synthase\ Context:(NC_002946)-[24506-<br>25816]\ Notes:catalyzes the formation of N-acetyl-L-<br>glutamate from L-glutamate and acetyl-CoA in arginine<br>biosynthesis                                                                                                                                               |
| NGO0028 | 0.4969 | 1.45  | up   | 0.3142 | 1.43   | up   | 0.9776 | -1.01 | down | hypothetical protein\ Context:(NC_002946)-[25813-26241]\<br>Notes:Best Blastp Hit: pir   A81033 hypothetical protein<br>NMB1875 [imported] - Neisseria meningitidis (group B<br>strain MD58) >gi 7227133 gb AAF42209.1  (AE002537)<br>hypothetical protein [Neisseria meningitidis MC58]                                               |
| NGO0029 | 0.8772 | -1.08 | down | 0.8229 | 1.08   | up   | 0.9833 | 1.01  | up   | orotate phosphoribosyltransferase\ Context:(NC_002946)-<br>[26309-26950]\ Notes:involved in fifth step of pyrimidine<br>biosynthesis; converts orotidine 5'-phosphate and<br>diphosphate to orotate and 5-phospho-alpha-D-ribose 1-<br>diphosphate                                                                                     |

|         |        |       |      |        |        |      |        |       |      |                                                                                                                                                                                                                                                                                                                                                                                |
|---------|--------|-------|------|--------|--------|------|--------|-------|------|--------------------------------------------------------------------------------------------------------------------------------------------------------------------------------------------------------------------------------------------------------------------------------------------------------------------------------------------------------------------------------|
| NGO0030 | 0.1402 | -2.45 | down | 0.0621 | -3.35  | down | 0.0585 | -2.46 | down | hypothetical protein\ Context:(NC_002946)-[27012-27749]\<br>Notes:Best Blastp Hit: pir    G81032 DNA polymerase;<br>bacteriophage-type; probable NMB1873 [imported] -<br>Neisseria meningitidis (group B strain MD58)<br>>gi 7227131 gb AAF42207.1  (AE002537) DNA<br>polymerase; bacteriophage-type; putative [Neisseria<br>meningitidis MC58] COG1573 Uracil-DNA glycosylase |
| NGO0031 | 0.7753 | 1.13  | up   | 0.6419 | 1.33   | up   | 0.9883 | 1.00  | up   | putative acetyltransferase\ Context:(NC_002946)-[27743-<br>28183]\ Notes:Best Blastp Hit: emb  CAB83875.1 <br>(AL162753) putative acetyltransferase [Neisseria<br>meningitidis] COG0456 Acetyltransferases                                                                                                                                                                     |
| NGO0032 | 0.0506 | -4.02 | down | 0.0025 | -8.44  | down | 0.5766 | -1.27 | down | hypothetical protein\ Context:(NC_002946)-[28180-28857]\<br>Notes:Best Blastp Hit: pir    F81977 hypothetical protein<br>NMA0585 [imported] - Neisseria meningitidis (group A<br>strain Z2491) >gi 7379321 emb CAB83876.1  (AL162753)<br>hypothetical protein NMA0585 [Neisseria meningitidis]<br>COG1214 Inactive homologs of metal-dependent                                 |
| NGO0033 | 0.4484 | -1.95 | down | 0.0201 | -15.38 | down | 0.6980 | -1.87 | down | hypothetical protein\ Context:(NC_002946)-[28996-29853]\<br>Notes:Best Blastp Hit: pir    D81032 hypothetical protein<br>NMB1870 [imported] - Neisseria meningitidis (group B<br>strain MD58) >gi 7227128 gb AAF42204.1  (AE002537)<br>hypothetical protein [Neisseria meningitidis MC58]                                                                                      |
| NGO0034 | 0.3658 | -1.71 | down | 0.7983 | -1.11  | down | 0.2679 | -1.56 | down | fructose-1,6-bisphosphate aldolase\ Context:(NC_002946)-<br>[29992-31056]\ Notes:class II aldolase; catalyzes the<br>reversible aldol condensation of<br>dihydroxyacetonephosphate and glyceraldehyde 3-<br>phosphate in the Calvin cycle; glycolysis and<br>gluconeogenesis                                                                                                   |
| NGO0035 | 0.1244 | 2.23  | up   | 0.0800 | -4.29  | down | 0.7132 | 1.19  | up   | putative site-specific recombinase\<br>Context:(NC_002946)+[31250-32167]\ Notes:XerC; Best<br>Blastp Hit: pir    A81978 probable integrase/recombinase<br>NMA0588 [imported] - Neisseria meningitidis (group A<br>strain Z2491) >gi 7379324 emb CAB83879.1  (AL162753)<br>putative integrase/recombinase [Neisseria meningitidis]<br>COG0582 Integrase                         |

|         |        |       |      |        |       |      |        |       |      |                                                                                                                                                                                                                                                                                                                                                                              |
|---------|--------|-------|------|--------|-------|------|--------|-------|------|------------------------------------------------------------------------------------------------------------------------------------------------------------------------------------------------------------------------------------------------------------------------------------------------------------------------------------------------------------------------------|
| NGO0036 | 0.1376 | 2.23  | up   | 0.2618 | 2.44  | up   | 0.1742 | 2.09  | up   | 1-deoxy-D-xylulose-5-phosphate synthase\<br>Context:(NC_002946)+[32252-34165]\ Notes:catalyzes the formation of 1-deoxy-D-xylulose 5-phosphate from pyruvate and D-glyceraldehyde 3-phosphate                                                                                                                                                                                |
| NGO0037 | 0.0548 | -5.18 | down | 0.3639 | -1.71 | down | 0.5187 | -1.58 | down | hypothetical protein\<br>Context:(NC_002946)-[34412-35740]\ Notes:Best Blastp Hit: pir   C81034 conserved hypothetical protein NMB1866 [imported] - Neisseria meningitidis (group B strain MD58) >gi 7227123 gb AAF42200.1  (AE002536) conserved hypothetical protein [Neisseria meningitidis MC58] COG0621 Fe-S oxidoreductases family 1                                    |
| NGO0039 | 0.1392 | -4.02 | down | 0.5012 | -1.25 | down | 0.0390 | -3.23 | down | hypothetical protein\<br>Context:(NC_002946)+[36107-36460]\ Notes:Best Blastp Hit: pir   D81978 hypothetical protein NMA0591 [imported] - Neisseria meningitidis (group A strain Z2491) >gi 7379327 emb CAB83882.1  (AL162753) hypothetical protein NMA0591 [Neisseria meningitidis]                                                                                         |
| NGO0040 | 0.2921 | -1.62 | down | 0.6914 | 1.19  | up   | 0.7172 | 1.17  | up   | glutamate-1-semialdehyde aminotransferase\<br>Context:(NC_002946)+[36524-37804]\ Notes:Converts (S)-4-amino-5-oxopentanoate to 5-aminolevulinic acid during the porphyrin biosynthesis pathway                                                                                                                                                                               |
| NGO0042 | 0.1953 | 2.25  | up   | 0.3965 | 2.45  | up   | 0.1525 | 3.36  | up   | oligoribonuclease\<br>Context:(NC_002946)-[39110-39673]\ Notes:3'-5' exoribonuclease specific for small oligoribonucleotides                                                                                                                                                                                                                                                 |
| NGO0043 | 0.0543 | 2.67  | up   | 0.0551 | 3.89  | up   | 0.1203 | 2.60  | up   | ribosomal protein L11 methyltransferase\<br>Context:(NC_002946)-[39691-40578]\ Notes:methylates ribosomal protein L11 at multiple amino acid positions; mutations of these genes in Escherichia coli or Thermus thermophilus has no apparent phenotype                                                                                                                       |
| NGO0044 | 0.2309 | 1.72  | up   | 0.5228 | 1.24  | up   | 0.1311 | 1.66  | up   | acetyl-CoA carboxylase; biotin carboxylase\<br>Context:(NC_002946)-[40682-42043]\ Notes:Best Blastp Hit: pir   F81033 acetyl-CoA carboxylase; biotin carboxylase NMB1861 [imported] - Neisseria meningitidis (group B strain MD58) >gi 7227118 gb AAF42195.1  (AE002536) acetyl-CoA carboxylase; biotin carboxylase [Neisseria meningitidis MC58] COG0439 Biotin carboxylase |

|         |        |       |      |        |       |      |        |       |      |                                                                                                                                                                                                                                                                                                                                                                 |
|---------|--------|-------|------|--------|-------|------|--------|-------|------|-----------------------------------------------------------------------------------------------------------------------------------------------------------------------------------------------------------------------------------------------------------------------------------------------------------------------------------------------------------------|
| NGO0045 | 0.5342 | 1.38  | up   | 0.9840 | 1.01  | up   | 0.4894 | 1.28  | up   | acetyl-CoA carboxylase biotin carboxyl carrier protein subunit\ Context:(NC_002946)-[42157-42618]\<br>Notes:composes the biotin carboxyl carrier protein subunit of the acetyl-CoA carboxylase complex; the enzyme that catalyzes the carboxylation of acetyl-CoA to malonyl-CoA; which in turn controls the rate of fatty acid metabolism                      |
| NGO0046 | 0.1468 | 3.67  | up   | 0.6018 | -1.26 | down | 0.0225 | 2.11  | up   | hypothetical protein\ Context:(NC_002946)-[42600-42857]\<br>Notes:                                                                                                                                                                                                                                                                                              |
| NGO0047 | 0.8858 | 1.11  | up   | 0.4193 | -1.41 | down | 0.9387 | -1.03 | down | S-adenosylmethionine:tRNAribosyltransferase-isomerase\ Context:(NC_002946)+[42974-44014]\ Notes:Synthesizes oQ from preQ1 in a single S-adenosylmethionine-requiring step                                                                                                                                                                                       |
| NGO0048 | 0.3312 | 1.82  | up   | 0.0276 | 2.83  | up   | 0.1429 | 2.28  | up   | carbamoyl phosphate synthase large subunit\ Context:(NC_002946)-[44215-47430]\ Notes:four CarB-CarA dimers form the carbamoyl phosphate synthetase holoenzyme that catalyzes the production of carbamoyl phosphate; CarB is responsible for the amidotransferase activity                                                                                       |
| NGO0049 | 0.1303 | 2.81  | up   | 0.0101 | 4.24  | up   | 0.2328 | 1.97  | up   | hypothetical protein\ Context:(NC_002946)-[47441-47974]\<br>Notes:Best Blastp Hit: possibly phase variable - 8A residue homopolymer repeat in the coding sequence (ON)                                                                                                                                                                                          |
| NGO0050 | 0.5971 | -1.28 | down | 0.7362 | -1.18 | down | 0.7774 | -1.26 | down | hypothetical protein\ Context:(NC_002946)-[49539-49928]\<br>Notes:Best Blastp Hit: gb AAC78450.1  (AF029362) similar to E. coli ORF; encoded by GenBank Accession Number X97282; and to H. influenzae protein HI0925; encoded by GenBank Accession Number U32774; and to H. influenzae protein HI1162; encoded by GenBank Accession Number U32796 [Neisseria g> |
| NGO0053 | 0.9144 | 1.06  | up   | 0.1702 | 1.88  | up   | 0.8677 | -1.05 | down | carbamoyl phosphate synthase small subunit\ Context:(NC_002946)-[50524-51657]\ Notes:catalyzes production of carbamoyl phosphate from bicarbonate and glutamine in pyrimidine and arginine biosynthesis pathways; forms an octamer composed of four CarAB dimers                                                                                                |
| NGO0054 | 0.4342 | 1.83  | up   | 0.4647 | -3.53 | down | 0.4108 | -3.36 | down | hypothetical protein\ Context:(NC_002946)+[51927-52244]\ Notes:Best Blastp Hit: gb AAD38303.1 AF036242_3 (AF036242) unknown [Neisseria meningitidis]                                                                                                                                                                                                            |

|         |        |       |      |        |        |      |        |       |      |                                                                                                                                                                                                                                                                                                                                                                                                           |
|---------|--------|-------|------|--------|--------|------|--------|-------|------|-----------------------------------------------------------------------------------------------------------------------------------------------------------------------------------------------------------------------------------------------------------------------------------------------------------------------------------------------------------------------------------------------------------|
| NGO0055 | 0.1165 | 2.47  | up   | 0.0971 | 1.90   | up   | 0.2637 | 1.55  | up   | pilus-associated protein\ Context:(NC_002946)-[52527-55670]\ Notes: PilC1; Best Blastp Hit: possibly phase variable - 13G residue homopolymer repeat in the coding sequence (ON)                                                                                                                                                                                                                          |
| NGO0056 | 0.2644 | 1.82  | up   | 0.7071 | -1.24  | down | 0.3483 | 1.38  | up   | putative atpase\ Context:(NC_002946)-[57122-58201]\ Notes: Mrp; Best Blastp Hit: pir   G81980 hypothetical protein NMA0611 [imported] - Neisseria meningitidis (group A strain Z2491) >gi 7379346 emb CAB83901.1  (AL162753) hypothetical protein NMA0611 [Neisseria meningitidis] COG0489 ATPases involved in chromosome partitioning                                                                    |
| NGO0057 | 0.0851 | -4.91 | down | 0.0008 | -13.27 | down | 0.2898 | -2.27 | down | putative thioredoxin\ Context:(NC_002946)+[58575-59084]\ Notes: Best Blastp Hit: emb CAB83902.1  (AL162753) putative periplasmic thioredoxin [Neisseria meningitidis] COG0526 Thiol-disulfide isomerase and thioredoxins                                                                                                                                                                                  |
| NGO0058 | 0.7012 | 1.22  | up   | 0.9979 | 1.00   | up   | 0.8043 | -1.08 | down | MarR family transcriptional regulator\ Context:(NC_002946)+[59488-59865]\ Notes: Best Blastp Hit: gb AAF42178.1  (AE002534) transcriptional regulator; MarR family [Neisseria meningitidis MC58] >gi 7379348 emb CAB83903.1  (AL162753) putative marR family transcriptional regulator [Neisseria meningitidis] COG1846 Transcriptional regulators; MarR/EmrR                                             |
| NGO0059 | 0.5731 | -1.50 | down | 0.0006 | -6.19  | down | 0.0258 | -5.54 | down | putative flavoprotein oxidoreductase\ Context:(NC_002946)+[59981-60481]\ Notes: Best Blastp Hit: pir   B81981 probable 4-hydroxyphenylacetate 3-monooxygenase (EC 1.14.13.3) small chain NMA0614 [similarity] - Neisseria meningitidis (group A strain Z2491) >gi 7379349 emb CAB83904.1  (AL162753) putative NADH:FMN oxidoreductase [Neisseria meningitidis] COG1853 Conserved protein/domain typically |
| NGO0060 | 0.0358 | -5.10 | down | 0.0445 | -4.04  | down | 0.7433 | -1.22 | down | putative sugar-phosphate transferase\ Context:(NC_002946)+[60497-61192]\ Notes: Best Blastp Hit: gb AAF42176.1  (AE002534) mannose-1-phosphate guanyltransferase-related protein [Neisseria meningitidis MC58] COG1208 Nucleoside-diphosphate-sugar                                                                                                                                                       |



|         |        |       |      |        |       |      |        |       |      |                                                                                                                                                                                                                                                                                                                                            |
|---------|--------|-------|------|--------|-------|------|--------|-------|------|--------------------------------------------------------------------------------------------------------------------------------------------------------------------------------------------------------------------------------------------------------------------------------------------------------------------------------------------|
| NGO0062 | 0.0243 | -4.69 | down | 0.1574 | -2.06 | down | 0.0677 | -2.92 | down | formate--tetrahydrofolate ligase\<br>Context:(NC_002946)+[61831-63507]\ Notes:catalyzes the formation of 10-formyltetrahydrofolate from formate and tetrahydrofolate                                                                                                                                                                       |
| NGO0063 | 0.2758 | 1.94  | up   | 0.7649 | 1.11  | up   | 0.8895 | -1.04 | down | translation-associated GTPase\<br>Context:(NC_002946)+[63621-64712]\ Notes:the crystal structure of the Haemophilus influenzae YchF protein showed similarity to the yeast structure (PDB: 1NI3); fluorescence spectroscopy revealed nucleic acid binding; the yeast protein YBR025c interacts with the translation elongation factor eEF1 |
| NGO0064 | 0.4668 | 1.48  | up   | 0.2585 | 1.55  | up   | 0.3079 | -1.61 | down | hypothetical protein\<br>Context:(NC_002946)+[64750-64989]\ Notes:Best Blastp Hit: gb AAF42172.1  (AE002533) hypothetical protein [Neisseria meningitidis MC58]                                                                                                                                                                            |
| NGO0065 | 0.2245 | -3.68 | down | 0.0425 | -6.12 | down | 0.2686 | -2.37 | down | putative lipo-oligosaccharide acyltransferase\<br>Context:(NC_002946)+[64986-66860]\ Notes:Best Blastp Hit: gb AAF42171.1  (AE002533) lipopolysaccharide biosynthesis protein WbpC; putative [Neisseria meningitidis MC58] COG1835 Predicted acyltransferases                                                                              |
| NGO0066 | 0.3643 | 1.58  | up   | 0.5871 | 1.18  | up   | 0.7206 | -1.18 | down | putative tyrosyl-tRNA synthase\<br>Context:(NC_002946)+[66922-68217]\ Notes:TyrRS Best Blastp Hit: pir A81037 tyrosyl-tRNA synthetase NMB1835 [imported] - Neisseria meningitidis (group B strain MD58) >gi 7227090 gb AAF42170.1  (AE002533) tyrosyl-tRNA synthetase [Neisseria meningitidis MC58] COG0162 Tyrosyl-tRNA synthetase        |
| NGO0068 | 0.8800 | -1.08 | down | 0.5519 | -1.29 | down | 0.6213 | -1.26 | down | bifunctional riboflavin kinase/FMN adenylyltransferase\<br>Context:(NC_002946)+[70214-71173]\ Notes:catalyzes the formation of FMN from riboflavin and the formation of FAD from FMN; in Bacillus the ribC gene has both flavokinase and FAD synthetase activities                                                                         |
| NGO0069 | 0.0211 | 5.16  | up   | 0.1028 | 4.22  | up   | 0.1161 | 3.50  | up   | isoleucyl-tRNA synthetase\<br>Context:(NC_002946)+[71315-74104]\ Notes:IleRS; catalyzes the formation of isoleucyl-tRNA(Ile) from isoleucine and tRNA(Ile); since isoleucine and other amino acids such as valine are similar                                                                                                              |

|         |        |       |      |        |        |      |        |       |      |                                                                                                                                                                                                                                                                                                                                                                         |
|---------|--------|-------|------|--------|--------|------|--------|-------|------|-------------------------------------------------------------------------------------------------------------------------------------------------------------------------------------------------------------------------------------------------------------------------------------------------------------------------------------------------------------------------|
| NGO0070 | 0.1098 | 3.05  | up   | 0.0987 | 2.19   | up   | 0.1926 | 1.81  | up   | outer membrane opacity protein B\ Context:(NC_002946)-[74783-75580]\ Notes:OpaB; Best Blastp Hit: phase variable - 10 tandem repeats of CTCTT in the coding sequence (ON)                                                                                                                                                                                               |
| NGO0071 | 0.7725 | -1.15 | down | 0.2557 | -1.76  | down | 0.4911 | -1.26 | down | lipoprotein signal peptidase\ Context:(NC_002946)+[76565-77059]\ Notes:lipoprotein signal peptidase; integral membrane protein that removes signal peptides from prolipoproteins during lipoprotein biosynthesis                                                                                                                                                        |
| NGO0072 | 0.3147 | 1.65  | up   | 0.8147 | -1.10  | down | 0.9370 | -1.02 | down | 4-hydroxy-3-methylbut-2-enyl diphosphate reductase\ Context:(NC_002946)+[77089-78057]\ Notes:catalyzes the conversion of 1-hydroxy-2-methyl-2-(E)-butenyl 4-diphosphate into isopentenyl diphosphate (IPP) and dimethylallyl diphosphate (DMAPP); functions in the nonmevalonate isoprenoid biosynthesis pathway                                                        |
| NGO0073 | 0.5390 | 1.38  | up   | 0.5598 | 1.49   | up   | 0.5372 | 1.58  | up   | putative phosphatase\ Context:(NC_002946)-[78813-79472]\ Notes:Best Blastp Hit: gb AAF42165.1  (AE002532) phosphoglycolate phosphatase; putative [Neisseria meningitidis MC58] COG0546 Predicted phosphatases                                                                                                                                                           |
| NGO0076 | 0.0625 | -7.15 | down | 0.0240 | -14.83 | down | 0.9396 | -1.11 | down | hypothetical protein\ Context:(NC_002946)+[80406-80726]\ Notes:Best Blastp Hit: gb AAF42163.1  (AE002532) conserved hypothetical protein [Neisseria meningitidis MC58]                                                                                                                                                                                                  |
| NGO0077 | 0.0277 | -9.23 | down | 0.1379 | -4.92  | down | 0.7532 | -1.45 | down | hypothetical protein\ Context:(NC_002946)+[80714-81337]\ Notes:Best Blastp Hit: gb AAF42163.1  (AE002532) conserved hypothetical protein [Neisseria meningitidis MC58]                                                                                                                                                                                                  |
| NGO0078 | 0.7490 | -1.24 | down | 0.7873 | -1.27  | down | 0.3668 | 1.70  | up   | putative DNA polymerase III; alpha subunit\ Context:(NC_002946)-[81989-85423]\ Notes:Best Blastp Hit: pir H81037 DNA polymerase III; alpha chain NMB1827 [imported] - Neisseria meningitidis (group B strain MD58) >gi 7227081 gb AAF42162.1  (AE002532) DNA polymerase III; alpha subunit [Neisseria meningitidis MC58] COG0587 DNA-dependent DNA polymerase III alpha |
| NGO0079 | 0.4227 | 1.47  | up   | 0.7975 | -1.11  | down | 0.8333 | 1.07  | up   | hypothetical protein\ Context:(NC_002946)+[85956-86189]\ Notes:Best Blastp Hit: emb CAB83923.1  (AL162753) hypothetical protein NMA0633 [Neisseria meningitidis]                                                                                                                                                                                                        |

|         |        |       |      |        |       |      |        |       |      |                                                                                                                                                                                                                                                                                                                                                                                                                                         |
|---------|--------|-------|------|--------|-------|------|--------|-------|------|-----------------------------------------------------------------------------------------------------------------------------------------------------------------------------------------------------------------------------------------------------------------------------------------------------------------------------------------------------------------------------------------------------------------------------------------|
| NGO0080 | 0.9669 | 1.02  | up   | 0.5717 | -1.32 | down | 0.9219 | -1.03 | down | hypothetical protein\ Context:(NC_002946)+[86167-86370]\ Notes:Best Blastp Hit: gb AAF42160.1  (AE002532) hypothetical protein [Neisseria meningitidis MC58]                                                                                                                                                                                                                                                                            |
| NGO0081 | 0.3315 | -2.06 | down | 0.5153 | -1.67 | down | 0.0373 | -3.44 | down | hypothetical protein\ Context:(NC_002946)+[86665-87501]\ Notes:Best Blastp Hit: pir   A81040 conserved hypothetical protein NMB1824 [imported] - Neisseria meningitidis (group B strain MD58)<br>>gi 7227077 gb AAF42159.1  (AE002531) conserved hypothetical protein [Neisseria meningitidis MC58]<br>COG0613 Predicted metal-dependent phosphoesterases                                                                               |
| NGO0082 | 0.1615 | -2.98 | down | 0.0289 | -5.37 | down | 0.7629 | -1.18 | down | valine--pyruvate transaminase\ Context:(NC_002946)-[87553-88845]\ Notes:transaminase C; catalyzes transamination of alanine; valine; and 2-aminobutyrate with their respective 2-keto acids; also catalyzes terminal step in valine biosynthesis                                                                                                                                                                                        |
| NGO0083 | 0.1280 | -2.39 | down | 0.1251 | -3.68 | down | 0.2730 | -1.91 | down | pilin glycosylation protein\ Context:(NC_002946)-[88901-90811]\ Notes:PglD; Best Blastp Hit: pir   G81039 pilin glycosylation protein PglD NMB1822 [imported] - Neisseria meningitidis (group B strain MD58)<br>>gi 3299891 gb AAC25981.1  (AF014804) PglD [Neisseria meningitidis] >gi 7227075 gb AAF42157.1  (AE002531) pilin glycosylation protein PglD [Neisseria meningitidis MC58] COG1086 Predicted nucleoside-diphosphate sugar |
| NGO0084 | 0.0356 | -3.09 | down | 0.0127 | -5.14 | down | 0.0264 | -2.97 | down | PglC\ Context:(NC_002946)-[90859-92034]\ Notes:Best Blastp Hit: pir   H81983 pilin glycosylation protein NMA0638 [imported] - Neisseria meningitidis (group A strain Z2491) >gi 7379371 emb CAB83928.1  (AL162753)                                                                                                                                                                                                                      |
| NGO0085 | 0.9090 | -1.12 | down | 0.7108 | -1.25 | down | 0.2605 | 2.32  | up   | PglB\ Context:(NC_002946)-[92165-93406]\ Notes:Best Blastp Hit: gb AAC25979.1  (AF014804) PglB [Neisseria meningitidis] >gi 7227073 gb AAF42155.1  (AE002531) pilin glycosylation protein PglB [Neisseria meningitidis MC58] COG2148 Sugar transferases involved in                                                                                                                                                                     |
| NGO0086 | 0.6571 | 1.28  | up   | 0.9556 | -1.07 | down | 0.8425 | 1.18  | up   | hypothetical protein\ Context:(NC_002946)-[93399-94565]\ Notes:Best Blastp Hit: possibly phase variable - 10C residue homopolymer repeat in the coding sequence (ON)<br>COG0438 Glycosyltransferases I                                                                                                                                                                                                                                  |

|         |        |       |      |        |        |      |        |       |      |                                                                                                                                                                                                                                                                                                                                                                                                                                                                                                       |
|---------|--------|-------|------|--------|--------|------|--------|-------|------|-------------------------------------------------------------------------------------------------------------------------------------------------------------------------------------------------------------------------------------------------------------------------------------------------------------------------------------------------------------------------------------------------------------------------------------------------------------------------------------------------------|
| NGO0087 | 0.4380 | 1.67  | up   | 0.2408 | 1.94   | up   | 0.1234 | 3.12  | up   | hypothetical protein\ Context:(NC_002946)-[94579-95643]\<br>Notes:Best Blastp Hit: gb AAF84279.1 AE003977_2<br>(AE003977) conserved hypothetical protein [Xylella<br>fastidiosa] COG0438 Glycosyltransferases I                                                                                                                                                                                                                                                                                       |
| NGO0088 | 0.8940 | -1.11 | down | 0.9684 | 1.03   | up   | 0.5193 | -1.35 | down | hypothetical protein\ Context:(NC_002946)-[95640-97061]\<br>Notes:Best Blastp Hit: pir   C81984 probable<br>lipopolysaccharide biosynthesis translocase NMA0643<br>[imported] - Neisseria meningitidis (group A strain Z2491)<br>>gi 7379374 emb CAB83932.1  (AL162753) putative<br>lipopolysaccharide biosynthesis translocase [Neisseria<br>meningitidis] COG2244 Membrane protein involved in the<br>export of                                                                                     |
| NGO0089 | 0.7939 | 1.12  | up   | 0.4855 | -1.35  | down | 0.7444 | 1.14  | up   | putative diaminohydroxyphosphoribosylaminopyrimidine<br>deaminase\ Context:(NC_002946)-[97256-98365]\<br>Notes:Best Blastp Hit: pir   D81984 riboflavin bifunctional<br>biosynthesis protein ribD NMA0644 [similarity] - Neisseria<br>meningitidis (group A strain Z2491)<br>>gi 7379375 emb CAB83933.1  (AL162753) putative<br>diaminohydroxyphosphoribosylaminopyrimidine<br>deaminase/phosphoribosylamino)uracil reductase<br>[Neisseria meningitidis] COG0117 Pyrimidine deaminase;<br>riboflavin |
| NGO0090 | 0.7798 | 1.18  | up   | 0.0006 | -13.01 | down | 0.8284 | 1.11  | up   | transcriptional regulator NrdR\ Context:(NC_002946)-<br>[98397-98849]\ Notes:Best Blastp Hit: pir   A81039<br>conserved hypothetical protein NMB1816 [imported] -<br>Neisseria meningitidis (group B strain MD58)<br>>gi 7227069 gb AAF42151.1  (AE002531) conserved<br>hypothetical protein [Neisseria meningitidis MC58]<br>COG1327 Uncharacterized BCR                                                                                                                                             |
| NGO0091 | 0.0758 | -2.51 | down | 0.1742 | -2.12  | down | 0.2521 | -2.11 | down | hypothetical protein\ Context:(NC_002946)-[98878-99720]\<br>Notes:Best Blastp Hit: pir   H81038 conserved hypothetical<br>protein NMB1815 [imported] - Neisseria meningitidis<br>(group B strain MD58) >gi 7227068 gb AAF42150.1 <br>(AE002531) conserved hypothetical protein [Neisseria<br>meningitidis MC58] COG0121 Predicted glutamine<br>amidotransferase                                                                                                                                       |

|         |        |       |      |        |       |      |        |       |      |                                                                                                                                                                                                                                                                                                                                                                                                             |
|---------|--------|-------|------|--------|-------|------|--------|-------|------|-------------------------------------------------------------------------------------------------------------------------------------------------------------------------------------------------------------------------------------------------------------------------------------------------------------------------------------------------------------------------------------------------------------|
| NGO0092 | 0.6038 | -1.28 | down | 0.8658 | 1.08  | up   | 0.7204 | -1.11 | down | 3-dehydroquinase\ Context:(NC_002946)-[100459-101538]\ Notes:catalyzes the formation of 3-dehydroquinase from 3-deoxy-arabino-heptulonate 7-phosphate; functions in aromatic amino acid biosynthesis                                                                                                                                                                                                        |
| NGO0093 | 0.1166 | -2.18 | down | 0.3086 | -1.61 | down | 0.1940 | -1.98 | down | shikimate kinase\ Context:(NC_002946)-[101618-102130]\ Notes:catalyzes the formation of shikimate 3-phosphate from shikimate in aromatic amino acid biosynthesis                                                                                                                                                                                                                                            |
| NGO0094 | 0.0626 | 3.93  | up   | 0.0218 | 7.26  | up   | 0.0875 | 3.29  | up   | hypothetical protein\ Context:(NC_002946)-[103398-105569]\ Notes:Best Blastp Hit: pir   S70838 pilQ protein - Neisseria gonorrhoeae >gi   1173875   gb   AAC43603.1   (U40596) PilQ [Neisseria gonorrhoeae] >gi   1589217   prf   2210365A pilQ gene [Neisseria gonorrhoeae] COG1450 General secretion pathway protein D                                                                                    |
| NGO0095 | 0.3837 | 1.64  | up   | 0.4590 | 1.30  | up   | 0.4044 | 1.34  | up   | PilP\ Context:(NC_002946)-[105588-106133]\ Notes:Best Blastp Hit: pir   C81041 pilus assembly protein NMA0651 [imported] - Neisseria meningitidis (group B strain MD58; group A strain Z2491) >gi   7227064   gb   AAF42147.1   (AE002530) pilP protein [Neisseria meningitidis MC58] >gi   7379381   emb   CAB83939.1   (AL162753) pilus assembly protein [Neisseria meningitidis]; pilin assembly protein |
| NGO0096 | 0.3289 | 1.83  | up   | 0.6561 | 1.17  | up   | 0.4099 | 1.39  | up   | hypothetical protein\ Context:(NC_002946)-[106151-106798]\ Notes:Best Blastp Hit: gb   AAB52533.1   (U72876) PilO [Neisseria gonorrhoeae]                                                                                                                                                                                                                                                                   |
| NGO0097 | 0.6471 | 1.24  | up   | 0.7861 | 1.10  | up   | 0.9060 | 1.04  | up   | PilN\ Context:(NC_002946)-[106799-107398]\ Notes:Best Blastp Hit: pir   D81985 probable pilus assembly protein NMA0653 [imported] - Neisseria meningitidis (group A strain Z2491) >gi   7379383   emb   CAB83941.1   (AL162753) putative pilus assembly protein [Neisseria meningitidis]                                                                                                                    |
| NGO0098 | 0.3927 | 1.69  | up   | 0.5134 | 1.28  | up   | 0.6779 | 1.17  | up   | hypothetical protein\ Context:(NC_002946)-[107401-108516]\ Notes:Best Blastp Hit: gb   AAB52535.1   (U72876) PilM [Neisseria gonorrhoeae] COG0849 Predicted ATPases of the HSP70 class                                                                                                                                                                                                                      |

|         |        |       |      |        |       |      |        |       |      |                                                                                                                                                                                                                                                                                                                                                                                                                      |
|---------|--------|-------|------|--------|-------|------|--------|-------|------|----------------------------------------------------------------------------------------------------------------------------------------------------------------------------------------------------------------------------------------------------------------------------------------------------------------------------------------------------------------------------------------------------------------------|
| NGO0099 | 0.0588 | 2.94  | up   | 0.3597 | 1.49  | up   | 0.1844 | 1.51  | up   | PonA\ Context:(NC_002946)+[108668-111064]\ Notes:Best Blastp Hit: gb AAB52536.1  (U72876) penicillin-binding protein 1 [Neisseria gonorrhoeae] COG0744 Membrane carboxypeptidase                                                                                                                                                                                                                                     |
| NGO0100 | 0.9785 | -1.01 | down | 0.7440 | -1.15 | down | 0.7602 | -1.11 | down | GTPase EngB\ Context:(NC_002946)-[111184-111819]\ Notes:binds guanine nucleotides; in Escherichia coli depletion results in defective cell division and filamentation; in Bacillus subtilis this gene is essential;                                                                                                                                                                                                  |
| NGO0101 | 0.3698 | -1.76 | down | 0.2552 | -1.80 | down | 0.0526 | -2.00 | down | putative cytochrome precursor\<br>Context:(NC_002946)+[112020-112643]\ Notes:Best Blastp Hit: pir F81040 cytochrome C4 NMB1805 [imported] - Neisseria meningitidis (group B strain MD58; group A strain Z2491) >gi 7227059 gb AAF42142.1  (AE002530) cytochrome c4 [Neisseria meningitidis MC58] >gi 7379387 emb CAB83945.1  (AL162753) putative cytochrome C [Neisseria meningitidis]                               |
| NGO0102 | 0.9612 | -1.03 | down | 0.0081 | -3.11 | down | 0.2220 | -1.95 | down | putative cytochrome biogenesis protein\<br>Context:(NC_002946)+[112858-114873]\ Notes:Best Blastp Hit: pir E81040 cytochrome c-type biogenesis protein; probable NMB1804 [imported] - Neisseria meningitidis (group B strain MD58) >gi 7227058 gb AAF42141.1  (AE002530) cytochrome c-type biogenesis protein; putative [Neisseria meningitidis MC58] COG1333 ResB protein required for cytochrome c                 |
| NGO0103 | 0.0100 | -6.41 | down | 0.0345 | -7.32 | down | 0.1140 | -2.76 | down | putative cytochrome synthesis protein\<br>Context:(NC_002946)+[114866-116053]\ Notes:Best Blastp Hit: emb CAB83947.1  (AL162753) putative membrane protein [Neisseria meningitidis] COG0755 Cytochrome c biogenesis factors; CcmC                                                                                                                                                                                    |
| NGO0104 | 0.9769 | -1.02 | down | 0.0048 | -6.22 | down | 0.1266 | -2.27 | down | O-sialoglycoprotein endopeptidase\<br>Context:(NC_002946)+[116169-117233]\ Notes:in most organisms; only the N-terminal domain is present in a single polypeptide; in some archaea this domain is fused to a kinase domain; this gene is essential for growth in Escherichia coli and Bacillus subtilis; the secreted glycoprotease from Pasteurella haemolytica showed specificity for O-sialoglycosylated proteins |

|         |        |       |      |        |        |      |        |       |      |                                                                                                                                                                                                                                                                                                                                         |
|---------|--------|-------|------|--------|--------|------|--------|-------|------|-----------------------------------------------------------------------------------------------------------------------------------------------------------------------------------------------------------------------------------------------------------------------------------------------------------------------------------------|
| NGO0105 | 0.0864 | -2.56 | down | 0.2853 | -1.71  | down | 0.6625 | -1.29 | down | lipid A biosynthesis lauroyl acyltransferase\<br>Context:(NC_002946)-[117278-118171]\ Notes:Acylates the intermediate (KDO)2-lipid IVA to form (KDO)2-(lauroyl)-lipid IVA                                                                                                                                                               |
| NGO0106 | 0.0112 | 5.42  | up   | 0.0009 | 6.43   | up   | 0.0041 | 4.98  | up   | S-adenosylmethionine synthetase\<br>Context:(NC_002946)+[118517-119686]\ Notes:methionine adenosyltransferase; catalyzes the formation of S-adenosylmethionine from methionine and ATP; methionine adenosyltransferase                                                                                                                  |
| NGO0107 | 0.1618 | 2.29  | up   | 0.1353 | 2.63   | up   | 0.8411 | 1.08  | up   | putative carboxypeptidase; penicillin binding protein\<br>Context:(NC_002946)-[119751-121160]\ Notes:Best Blastp Hit: gb AAC24040.1  (AF071224) penicillin binding protein 3 [Neisseria gonorrhoeae] COG2027 D-alanyl-D-alanine carboxypeptidase                                                                                        |
| NGO0108 | 0.3288 | 1.83  | up   | 0.4333 | 1.37   | up   | 0.4608 | 1.35  | up   | hypothetical protein\<br>Context:(NC_002946)+[121405-121890]\ Notes:Best Blastp Hit: pir   B81042 conserved hypothetical protein NMB1796 [imported] - Neisseria meningitidis (group B strain MD58)<br>>gi 7227050 gb AAF42134.1  (AE002529) conserved hypothetical protein [Neisseria meningitidis MC58] COG0431 Predicted flavoprotein |
| NGO0109 | 0.4904 | 1.77  | up   | 0.0427 | -9.37  | down | 0.3002 | -2.17 | down | hypothetical protein\<br>Context:(NC_002946)+[121880-122068]\ Notes:                                                                                                                                                                                                                                                                    |
| NGO0110 | 0.1099 | -2.96 | down | 0.1930 | -3.00  | down | 0.6263 | -1.70 | down | putative magnesium citrate secondary transporter\<br>Context:(NC_002946)+[122259-123572]\ Notes:Best Blastp Hit: gb AAF42132.1  (AE002529) citrate transporter [Neisseria meningitidis MC58]<br>>gi 7379397 emb CAB83955.1  (AL162753) putative transmembrane transport protein [Neisseria meningitidis]                                |
| NGO0112 | 0.0192 | -3.82 | down | 0.0053 | -12.40 | down | 0.1691 | -2.06 | down | putative two-component system sensor kinase\<br>Context:(NC_002946)+[124550-125800]\ Notes:Best Blastp Hit: gb AAG24266.1 AF139612_3 (AF139612) BasS [Neisseria gonorrhoeae] COG0642 Sensory transduction histidine kinases                                                                                                             |
| NGO0113 | 0.0187 | 5.18  | up   | 0.0545 | 4.15   | up   | 0.0809 | 2.84  | up   | putative ribonuclease G / cytoplasmic axial filament protein\<br>Context:(NC_002946)-[125835-127328]\ Notes:Best Blastp Hit: emb CAB83959.1  (AL162753) hypothetical protein NMA0672 [Neisseria meningitidis] COG1530 Ribonucleases G and E                                                                                             |

|         |        |       |      |        |        |      |        |       |      |                                                                                                                                                                                                                                                                                                                                                                                                                                                                                   |
|---------|--------|-------|------|--------|--------|------|--------|-------|------|-----------------------------------------------------------------------------------------------------------------------------------------------------------------------------------------------------------------------------------------------------------------------------------------------------------------------------------------------------------------------------------------------------------------------------------------------------------------------------------|
| NGO0114 | 0.1631 | 2.19  | up   | 0.2867 | 1.57   | up   | 0.4553 | 1.29  | up   | putative glutaredoxin\ Context:(NC_002946)+[127547-127804]\ Notes:Best Blastp Hit: gb AAF42129.1  (AE002529) glutaredoxin 3 [Neisseria meningitidis MC58] COG0695 Glutaredoxin and related proteins                                                                                                                                                                                                                                                                               |
| NGO0115 | 0.1898 | -3.01 | down | 0.0532 | -12.69 | down | 0.3027 | -3.30 | down | hypothetical protein\ Context:(NC_002946)-[127801-128310]\ Notes:Best Blastp Hit: sp P15041 YZSB_ECOLI very hypothetical 17.7 kD protein in SecB region>gi 76221 pir   QQEC17 hypothetical 17.7K protein (secB region) - Escherichia coli >gi 1128972 gb AAA83908.1  (M24489) ORF; putative [Escherichia coli]                                                                                                                                                                    |
| NGO0116 | 0.1619 | 2.41  | up   | 0.1834 | 1.62   | up   | 0.2937 | 1.58  | up   | preprotein translocase subunit SecB\ Context:(NC_002946)+[127825-128268]\ Notes:molecular chaperone that is required for the normal export of envelope proteins out of the cell cytoplasm; in Escherichia coli this proteins forms a homotetramer in the cytoplasm and delivers proteins to be exported to SecA                                                                                                                                                                   |
| NGO0117 | 0.0051 | 5.40  | up   | 0.7255 | 1.37   | up   | 0.8598 | 1.14  | up   | hypothetical protein\ Context:(NC_002946)+[128354-130396]\ Notes:Best Blastp Hit: pir   E81043 ATP-dependent DNA helicase RecG NMB1788 [imported] - Neisseria meningitidis (group B strain MD58) >gi 7227042 gb AAF42127.1  (AE002528) ATP-dependent DNA helicase RecG [Neisseria meningitidis MC58] COG1200 RecG-like helicases                                                                                                                                                  |
| NGO0118 | 0.5648 | -1.29 | down | 0.0236 | -3.33  | down | 0.1863 | -1.88 | down | N-acetyl-gamma-glutamyl-phosphate reductase\ Context:(NC_002946)-[130990-132033]\ Notes:catalyzes the reduction of N-acetyl-5-glutamyl phosphate to N-acetyl-L-glutamate 5-semialdehyde in arginine biosynthesis and the reduction of N-acetyl-gamma-aminoadipyl-phosphate to N-acetyl-L-aminoadipate-semialdehyde in lysine biosynthesis; involved in both the arginine and lysine biosynthetic pathways; lysine is produced via the AAA pathway; lysine from alpha-aminoadipate |
| NGO0119 | 0.5410 | 1.49  | up   | 0.5710 | -1.52  | down | 0.4326 | -1.51 | down | hypothetical protein\ Context:(NC_002946)-[132030-132323]\ Notes:Best Blastp Hit: emb CAB83964.1  (AL162753) hypothetical protein NMA0677 [Neisseria meningitidis]                                                                                                                                                                                                                                                                                                                |
| NGO0120 | 0.7922 | -1.33 | down | 0.0115 | -20.23 | down | 0.0817 | -4.37 | down | hypothetical protein\ Context:(NC_002946)+[132347-132475]\ Notes:                                                                                                                                                                                                                                                                                                                                                                                                                 |



|         |        |        |      |        |        |      |        |       |      |                                                                                                                                                                                                                                                                                                                                                                                                      |
|---------|--------|--------|------|--------|--------|------|--------|-------|------|------------------------------------------------------------------------------------------------------------------------------------------------------------------------------------------------------------------------------------------------------------------------------------------------------------------------------------------------------------------------------------------------------|
| NGO0121 | 0.0022 | -18.44 | down | 0.0003 | -50.71 | down | 0.0177 | -8.74 | down | hypothetical protein\ Context:(NC_002946)+[132575-133729]\ Notes:Best Blastp Hit: gb AAF42125.1  (AE002528) hypothetical protein [Neisseria meningitidis MC58]                                                                                                                                                                                                                                       |
| NGO0122 | 0.8599 | -1.09  | down | 0.8784 | -1.07  | down | 0.5191 | -1.30 | down | hypothetical protein\ Context:(NC_002946)+[133904-134311]\ Notes:Best Blastp Hit: pir   F81988 hypothetical protein NMA0681 [imported] - Neisseria meningitidis (group A strain Z2491) >gi 7379409 emb CAB83968.1  (AL162753) hypothetical protein NMA0681 [Neisseria meningitidis]                                                                                                                  |
| NGO0123 | 0.0077 | -8.32  | down | 0.0520 | -4.42  | down | 0.1136 | -3.72 | down | putative secretion protein\ Context:(NC_002946)+[134372-135646]\ Notes:Best Blastp Hit: gb AAF61809.1  (AF129811) unknown [Moraxella catarrhalis] COG1566 Multidrug resistance efflux pump                                                                                                                                                                                                           |
| NGO0124 | 0.3674 | 1.58   | up   | 0.5794 | -1.23  | down | 0.9328 | -1.02 | down | hypothetical protein\ Context:(NC_002946)+[135831-136178]\ Notes:Best Blastp Hit: sp O24528 MT1_FESRU metallothionein-like protein 1 >gi 2317922 gb AAB70464.1  (U96646) mcMT1 [Festuca rubra]                                                                                                                                                                                                       |
| NGO0125 | 0.1965 | 2.20   | up   | 0.2842 | 5.10   | up   | 0.5743 | -1.20 | down | hypothetical protein\ Context:(NC_002946)+[136192-136407]\ Notes:Best Blastp Hit: pir   B70183 conserved hypothetical protein BB0667 - Lyme disease spirochete >gi 2688586 gb AAC67004.1  (AE001167) conserved hypothetical protein [Borrelia burgdorferi]                                                                                                                                           |
| NGO0127 | 0.8056 | 1.17   | up   | 0.1158 | -1.86  | down | 0.5837 | -1.37 | down | fused ribonuclease BN/uncharacterized domain-containing protein\ Context:(NC_002946)-[137771-138997]\ Notes:RNase BN; required for 3' maturation of certain phage T4-encoded tRNAs; forms a dimer; specific for immature tRNA substrates containing incorrect residues within the universal CCA sequence; 3' to 5' exoribonuclease; this protein contains a C-terminal extension of unknown function |
| NGO0128 | 0.7868 | 1.14   | up   | 0.6614 | -1.17  | down | 0.9936 | 1.00  | up   | hypothetical protein\ Context:(NC_002946)+[139096-139476]\ Notes:Best Blastp Hit: gb AAC33457.1  (AF067083) Trp repressor binding protein [Vitreoscilla sp.]                                                                                                                                                                                                                                         |

|         |        |       |      |        |       |      |        |       |      |                                                                                                                                                                                                                                                                                                                                                              |
|---------|--------|-------|------|--------|-------|------|--------|-------|------|--------------------------------------------------------------------------------------------------------------------------------------------------------------------------------------------------------------------------------------------------------------------------------------------------------------------------------------------------------------|
| NGO0129 | 0.5950 | 1.30  | up   | 0.6663 | -1.23 | down | 0.7562 | -1.09 | down | YbaX\ Context:(NC_002946)+[139485-140159]\ Notes:Best Blastp Hit: pir     C81913 hypothetical protein NMA0702 [imported] - Neisseria meningitidis (group A strain Z2491) >gi 7379427 emb CAB83989.1   (AL162754) hypothetical protein NMA0702 [Neisseria meningitidis] COG0603 Predicted ATPase (PP-loop superfamily); putative aluminum resistance protein  |
| NGO0130 | 0.2031 | 1.84  | up   | 0.9599 | 1.02  | up   | 0.8715 | -1.04 | down | hypothetical protein\ Context:(NC_002946)+[140187-140702]\ Notes:Best Blastp Hit: pir     D81913 hypothetical protein NMA0703 [imported] - Neisseria meningitidis (group A strain Z2491) >gi 7379428 emb CAB83990.1   (AL162754) hypothetical protein NMA0703 [Neisseria meningitidis]                                                                       |
| NGO0131 | 0.3031 | 1.66  | up   | 0.7482 | -1.16 | down | 0.9651 | -1.01 | down | putative 6-pyruvoyl-tetrahydropterin synthase\ Context:(NC_002946)+[140790-141212]\ Notes:Best Blastp Hit: pir     E81913 hypothetical protein NMA0704 [imported] - Neisseria meningitidis (group A strain Z2491) >gi 7379429 emb CAB83991.1   (AL162754) hypothetical protein NMA0704 [Neisseria meningitidis] COG0720 6-pyruvoyl-tetrahydropterin synthase |
| NGO0132 | 0.0778 | 2.91  | up   | 0.9867 | 1.01  | up   | 0.2728 | -1.45 | down | hypothetical protein\ Context:(NC_002946)+[141478-142485]\ Notes:Best Blastp Hit: emb CAB83993.1   (AL162754) hypothetical protein NMA0707 [Neisseria meningitidis] COG0602 Organic radical activating enzymes                                                                                                                                               |
| NGO0133 | 0.1254 | 3.36  | up   | 0.1432 | -2.97 | down | 0.7695 | 1.25  | up   | hypothetical protein\ Context:(NC_002946)+[142700-142903]\ Notes:Best Blastp Hit: dbj BAA98955.1   (AP002547) CT631 hypothetical protein [Chlamydomonas pneumoniae]                                                                                                                                                                                          |
| NGO0135 | 0.1659 | 3.27  | up   | 0.2989 | -2.95 | down | 0.8960 | -1.13 | down | beta-hexosaminidase\ Context:(NC_002946)-[142978-144063]\ Notes:hydrolyzes the terminal non-reducing N-acetyl-D-hexosamine residues in N-acetyl-beta-D-hexosaminides                                                                                                                                                                                         |
| NGO0136 | 0.5104 | -1.42 | down | 0.3820 | -1.49 | down | 0.6524 | -1.29 | down | hypothetical protein\ Context:(NC_002946)-[144120-145640]\ Notes:Best Blastp Hit: gb AAF40961.1   (AE002408) conserved hypothetical protein [Neisseria meningitidis MC58] COG1757 Na+/H+ antiporter NhaC                                                                                                                                                     |
| NGO0137 | 0.0006 | 10.98 | up   | 0.7273 | -1.75 | down | 0.7778 | 1.74  | up   | hypothetical protein\ Context:(NC_002946)+[145668-145817]\ Notes:                                                                                                                                                                                                                                                                                            |

|         |        |        |      |        |        |      |        |       |      |                                                                                                                                                                                                                                                                                                                                                                                   |
|---------|--------|--------|------|--------|--------|------|--------|-------|------|-----------------------------------------------------------------------------------------------------------------------------------------------------------------------------------------------------------------------------------------------------------------------------------------------------------------------------------------------------------------------------------|
| NGO0138 | 0.0647 | 2.84   | up   | 0.2787 | 1.91   | up   | 0.4894 | 1.21  | up   | putative serine protease\ Context:(NC_002946)-[145843-147342]\ Notes:Best Blastp Hit: pir    B81914 probable periplasmic serine proteinase (EC 3.4.21.-) NMA0710 [imported] - Neisseria meningitidis (group A strain Z2491) >gi 7379434 emb CAB83996.1  (AL162754) putative periplasmic serine protease [Neisseria meningitidis] COG0265 Trypsin-like serine proteases; typically |
| NGO0139 | 0.0077 | -4.61  | down | 0.0060 | -13.41 | down | 0.1531 | -2.28 | down | putative endonuclease III\ Context:(NC_002946)-[147480-148109]\ Notes:Best Blastp Hit: pir    D81187 endonuclease III NMB0533 [imported] - Neisseria meningitidis (group B strain MD58) >gi 7225758 gb AAF40962.1  (AE002409) endonuclease III [Neisseria meningitidis MC58] COG0177 Predicted EndoIII-related endonuclease                                                       |
| NGO0140 | 0.0015 | -22.08 | down | 0.0120 | -24.19 | down | 0.0015 | -7.05 | down | hypothetical protein\ Context:(NC_002946)-[148156-148692]\ Notes:Best Blastp Hit: pir    D81914 probable membrane protein NMA0712 [imported] - Neisseria meningitidis (group A strain Z2491) >gi 7379436 emb CAB83998.1  (AL162754) putative membrane protein [Neisseria meningitidis] COG1238 Uncharacterized membrane protein                                                   |
| NGO0141 | 0.4350 | 2.96   | up   | 0.0007 | -80.65 | down | 0.7331 | -1.44 | down | hypothetical protein\ Context:(NC_002946)+[148719-148865]\ Notes:                                                                                                                                                                                                                                                                                                                 |
| NGO0142 | 0.3269 | 1.78   | up   | 0.6858 | 1.18   | up   | 0.3083 | 1.51  | up   | putative sugar transporter\ Context:(NC_002946)+[148948-150228]\ Notes:Best Blastp Hit: pir    F81187 glucose/galactose transporter NMB0535 [imported] - Neisseria meningitidis (group B strain MD58) >gi 7225760 gb AAF40964.1  (AE002409) glucose/galactose transporter [Neisseria meningitidis MC58] COG0738 Fucose permease                                                   |
| NGO0143 | 0.3583 | 2.45   | up   | 0.4326 | -2.61  | down | 0.0967 | -2.82 | down | hypothetical protein\ Context:(NC_002946)+[150518-151897]\ Notes:Best Blastp Hit: pir    F81914 probable transmembrane transport protein NMA0715 [imported] - Neisseria meningitidis (group A strain Z2491) >gi 7379438 emb CAB84000.1  (AL162754) putative transmembrane transport protein [Neisseria meningitidis] COG1757 Na+/H+ antiporter NhaC                               |

|         |        |       |      |        |       |      |        |       |      |                                                                                                                                                                                                                                                                                                                                     |
|---------|--------|-------|------|--------|-------|------|--------|-------|------|-------------------------------------------------------------------------------------------------------------------------------------------------------------------------------------------------------------------------------------------------------------------------------------------------------------------------------------|
| NGO0144 | 0.7673 | 1.13  | up   | 0.9012 | -1.04 | down | 0.8442 | 1.06  | up   | hypothetical protein\ Context:(NC_002946)-[152040-152864]\ Notes:Best Blastp Hit: pir     G81914 hypothetical protein NMA0716 [imported] - Neisseria meningitidis (group A strain Z2491) >gi 7379439 emb CAB84001.1  (AL162754) hypothetical protein NMA0716 [Neisseria meningitidis] COG1253 Uncharacterized CBS domain-containing |
| NGO0145 | 0.9533 | 1.03  | up   | 0.5683 | -1.32 | down | 0.3519 | -1.32 | down | hypothetical protein\ Context:(NC_002946)-[152866-153501]\ Notes:Best Blastp Hit: emb CAB84002.1  (AL162754) hypothetical protein NMA0717 [Neisseria meningitidis] COG0319 Uncharacterized BCR (putative metal-binding                                                                                                              |
| NGO0146 | 0.3133 | 1.57  | up   | 0.3243 | 1.40  | up   | 0.5474 | 1.17  | up   | porphobilinogen deaminase\ Context:(NC_002946)+[153500-154435]\ Notes:transformation of porphobilinogen to hydroxymethylbilane in porphyrin biosynthesis                                                                                                                                                                            |
| NGO0147 | 0.1927 | -1.95 | down | 0.4628 | -1.65 | down | 0.2992 | 1.39  | up   | hypothetical protein\ Context:(NC_002946)-[156345-157430]\ Notes:Best Blastp Hit: emb CAB84865.1  (AL162756) hypothetical protein [Neisseria meningitidis] COG0644 Dehydrogenases (flavoproteins)                                                                                                                                   |
| NGO0148 | 0.3591 | -1.62 | down | 0.6425 | -1.23 | down | 0.5896 | 1.15  | up   | hypothetical protein\ Context:(NC_002946)-[157367-157582]\ Notes:                                                                                                                                                                                                                                                                   |
| NGO0149 | 0.1437 | 2.03  | up   | 0.0978 | 2.58  | up   | 0.1186 | 1.56  | up   | putative ATP-dependent RNA helicase\ Context:(NC_002946)-[157762-159135]\ Notes:Best Blastp Hit: gb AAF41783.1  (AE002491) ATP-dependent RNA helicase; putative [Neisseria meningitidis MC58] COG0513 Superfamily II DNA and RNA helicases                                                                                          |
| NGO0150 | 0.1542 | -2.88 | down | 0.7180 | -1.37 | down | 0.1769 | -2.42 | down | hypothetical protein\ Context:(NC_002946)-[159159-159347]\ Notes:                                                                                                                                                                                                                                                                   |
| NGO0151 | 0.2727 | -1.84 | down | 0.2245 | 1.80  | up   | 0.3278 | -2.03 | down | hypothetical protein\ Context:(NC_002946)+[159349-160353]\ Notes:Best Blastp Hit: pir     G81085 nifR3 protein NMB1421 [imported] - Neisseria meningitidis (group B strain MD58) >gi 7226660 gb AAF41782.1  (AE002491) nifR3 protein [Neisseria meningitidis MC58] COG0042 Predicted TIM-barrel enzymes; possibly                   |

|         |        |       |      |        |       |      |        |       |      |                                                                                                                                                                                                                                                                                                                                                                              |
|---------|--------|-------|------|--------|-------|------|--------|-------|------|------------------------------------------------------------------------------------------------------------------------------------------------------------------------------------------------------------------------------------------------------------------------------------------------------------------------------------------------------------------------------|
| NGO0152 | 0.0930 | -3.26 | down | 0.1072 | -3.08 | down | 0.0028 | -6.42 | down | hypothetical protein\ Context:(NC_002946)+[160452-160781]\ Notes:Best Blastp Hit: gb AAF41781.1  (AE002491) factor-for-inversion stimulation protein Fis; putative [Neisseria meningitidis MC58] >gi 7380274 emb CAB84860.1  (AL162756) factor-for-inversion-stimulation protein [Neisseria meningitidis]                                                                    |
| NGO0153 | 0.4202 | -2.28 | down | 0.3532 | -2.18 | down | 0.1113 | -2.21 | down | Holliday junction resolvase\ Context:(NC_002946)+[160784-161320]\ Notes:endonuclease; resolves Holliday structures; forms a complex of RuvABC; the junction binding protein RuvA forms a hexameric ring along with the RuvB helicase and catalyzes branch migration; RuvC then interacts with RuvAB to resolve the Holliday junction by nicking DNA strands of like polarity |
| NGO0154 | 0.2458 | -2.33 | down | 0.1284 | -6.97 | down | 0.1491 | -3.09 | down | lipid A biosynthesis lauroyl acyltransferase\ Context:(NC_002946)+[161371-162240]\ Notes:Acylates the intermediate (KDO)2-lipid IVA to form (KDO)2-(lauroyl)-lipid IVA                                                                                                                                                                                                       |
| NGO0155 | 0.6411 | 1.33  | up   | 0.8436 | -1.11 | down | 0.4492 | -1.30 | down | hypothetical protein\ Context:(NC_002946)+[162894-163028]\ Notes:Best Blastp Hit: emb CAB84857.1  (AL162756) hypothetical DNA-binding protein [Neisseria meningitidis]                                                                                                                                                                                                       |
| NGO0156 | 0.8272 | -1.10 | down | 0.2594 | -2.00 | down | 0.7814 | -1.08 | down | hypothetical protein\ Context:(NC_002946)+[163144-163938]\ Notes:Best Blastp Hit: pir  H81856 hypothetical protein NMA1628 [imported] - Neisseria meningitidis (group A strain Z2491) >gi 7380270 emb CAB84856.1  (AL162756) hypothetical protein [Neisseria meningitidis]                                                                                                   |
| NGO0158 | 0.2866 | 1.68  | up   | 0.3766 | 1.35  | up   | 0.0397 | 2.48  | up   | putative aminopeptidase N\ Context:(NC_002946)+[164163-166766]\ Notes:Best Blastp Hit: pir  F81086 aminopeptidase N NMB1416 [imported] - Neisseria meningitidis (group B strain MD58) >gi 7226654 gb AAF41777.1  (AE002490) aminopeptidase N [Neisseria meningitidis MC58] COG0308 Aminopeptidase N                                                                          |
| NGO0160 | 0.0981 | 3.98  | up   | 0.9742 | -1.02 | down | 0.7599 | -1.10 | down | hypothetical protein\ Context:(NC_002946)-[167614-167805]\ Notes:Best Blastp Hit: emb CAB84331.1  (AL162755) hypothetical protein NMA1067 [Neisseria meningitidis]                                                                                                                                                                                                           |

|         |        |       |      |        |        |      |        |       |      |                                                                                                                                                                                                                                                                                             |
|---------|--------|-------|------|--------|--------|------|--------|-------|------|---------------------------------------------------------------------------------------------------------------------------------------------------------------------------------------------------------------------------------------------------------------------------------------------|
| NGO0161 | 0.7429 | 1.60  | up   | 0.7608 | -1.29  | down | 0.3141 | -3.52 | down | hypothetical protein\ Context:(NC_002946)-[167838-168305]\ Notes:Best Blastp Hit: emb CAB84332.1  (AL162755) hypothetical protein NMA1068 [Neisseria meningitidis]                                                                                                                          |
| NGO0162 | 0.5780 | -1.28 | down | 0.3035 | -1.74  | down | 0.0418 | -2.10 | down | hypothetical protein\ Context:(NC_002946)-[168362-168742]\ Notes:Best Blastp Hit: gb AAF41269.1  (AE002438) hypothetical protein [Neisseria meningitidis MC58]                                                                                                                              |
| NGO0163 | 0.7543 | 1.27  | up   | 0.2013 | 2.33   | up   | 0.0746 | -2.12 | down | hypothetical protein\ Context:(NC_002946)-[168745-169122]\ Notes:Best Blastp Hit: pir   F81150 hypothetical protein NMB0859 [imported] - Neisseria meningitidis (group B strain MD58) >gi 7226095 gb AAF41270.1  (AE002438) hypothetical protein [Neisseria meningitidis MC58]              |
| NGO0164 | 0.3031 | -1.94 | down | 0.0586 | -2.75  | down | 0.0477 | -2.59 | down | hypothetical protein\ Context:(NC_002946)-[169180-169545]\ Notes:Best Blastp Hit: emb CAB84335.1  (AL162755) hypothetical protein NMA1072 [Neisseria meningitidis]                                                                                                                          |
| NGO0165 | 0.0996 | 2.57  | up   | 0.7266 | -1.24  | down | 0.0145 | -3.08 | down | hypothetical protein\ Context:(NC_002946)-[169527-170066]\ Notes:Best Blastp Hit: gb AAF41272.1  (AE002438) hypothetical protein [Neisseria meningitidis MC58] >gi 7379768 emb CAB84336.1  (AL162755) hypothetical protein NMA1073 [Neisseria meningitidis]                                 |
| NGO0166 | 0.1695 | -2.89 | down | 0.0031 | -23.40 | down | 0.8425 | -1.11 | down | hypothetical protein\ Context:(NC_002946)-[170109-170975]\ Notes:Best Blastp Hit: pir   A81874 probable periplasmic protein NMA1084 [imported] - Neisseria meningitidis (group A strain Z2491) >gi 7379779 emb CAB84347.1  (AL162755) putative periplasmic protein [Neisseria meningitidis] |
| NGO0167 | 0.3255 | -3.74 | down | 0.1069 | -11.01 | down | 0.1010 | 3.73  | up   | hypothetical protein\ Context:(NC_002946)+[171011-171226]\ Notes:                                                                                                                                                                                                                           |
| NGO0168 | 0.1696 | 2.36  | up   | 0.1857 | 1.58   | up   | 0.2847 | 1.50  | up   | MntC\ Context:(NC_002946)-[171195-172121]\ Notes:Best Blastp Hit: gb AAG30300.1  (AY010757) periplasmic binding protein MntC [Neisseria gonorrhoeae] COG0803 Zn-binding (lipo) protein of the ABC-type Zn; putative ABC transporter; periplasmic binding protein                            |

|         |        |       |      |        |       |      |        |       |      |                                                                                                                                                                                                                                                                                                                                                                                                      |
|---------|--------|-------|------|--------|-------|------|--------|-------|------|------------------------------------------------------------------------------------------------------------------------------------------------------------------------------------------------------------------------------------------------------------------------------------------------------------------------------------------------------------------------------------------------------|
| NGO0169 | 0.5296 | -1.62 | down | 0.6784 | -1.35 | down | 0.8028 | -1.16 | down | putative ABC transporter; membrane protein\<br>Context:(NC_002946)-[172198-173025]\ Notes:Best Blastp<br>Hit: gb AAF41015.1  (AE002415) membrane protein<br>[Neisseria meningitidis MC58] COG1108 ABC-type Mn/Zn<br>transport systems; ATPase                                                                                                                                                        |
| NGO0170 | 0.5827 | 1.32  | up   | 0.7667 | 1.14  | up   | 0.8326 | -1.06 | down | putative ABC transporter; ATP-binding protein\<br>Context:(NC_002946)-[173108-173863]\ Notes:Best Blastp<br>Hit: gb AAF41016.1  (AE002415) ABC transporter; ATP-<br>binding protein [Neisseria meningitidis MC58] COG1121<br>ABC-type iron (III) transport system; ATPase                                                                                                                            |
| NGO0171 | 0.0977 | 2.53  | up   | 0.4656 | 1.38  | up   | 0.4586 | 1.25  | up   | 50S ribosomal protein L19\<br>Context:(NC_002946)-[174154-<br>174519]\ Notes:this protein is located at the 30S-50S<br>ribosomal subunit interface and may play a role in the<br>structure and function of the aminoacyl-tRNA binding site                                                                                                                                                           |
| NGO0172 | 0.0796 | 2.70  | up   | 0.2293 | 1.65  | up   | 0.3435 | 1.37  | up   | putative tRNA (guanine-N1)-methyltransferase\<br>Context:(NC_002946)-[174534-175283]\ Notes:Best Blastp<br>Hit: pir C81180 tRNA (guanine-N1)-methyltransferase<br>NMB0590 [imported] - Neisseria meningitidis (group B<br>strain MD58) >gi 7225820 gb AAF41018.1  (AE002415)<br>tRNA (guanine-N1)-methyltransferase [Neisseria<br>meningitidis MC58] COG0336 tRNA-(guanine-N1)-<br>methyltransferase |
| NGO0173 | 0.0626 | 3.37  | up   | 0.2510 | 1.57  | up   | 0.3645 | 1.43  | up   | 16S rRNA-processing protein\<br>Context:(NC_002946)-<br>[175283-175792]\ Notes:Essential for efficient processing<br>of 16S rRNA                                                                                                                                                                                                                                                                     |
| NGO0174 | 0.0857 | 2.98  | up   | 0.2498 | 1.61  | up   | 0.3251 | 1.47  | up   | 30S ribosomal protein S16\<br>Context:(NC_002946)-[175808-<br>176053]\ Notes:binds to lower part of 30S body where it<br>stabilizes two domains; required for efficient assembly of<br>30S; in Escherichia coli this protein has nuclease activity                                                                                                                                                   |
| NGO0176 | 0.0739 | 3.93  | up   | 0.1821 | 4.30  | up   | 0.2011 | 2.23  | up   | putative two-component system sensor kinase\<br>Context:(NC_002946)-[178639-180045]\ Notes:Best Blastp<br>Hit: gb AAF41022.1  (AE002415) sensor histidine kinase<br>[Neisseria meningitidis MC58] COG0642 Sensory<br>transduction histidine kinases                                                                                                                                                  |

|         |        |      |    |        |       |      |        |      |    |                                                                                                                                                                                                                                                                                                                                                                                                                                                                                                                           |
|---------|--------|------|----|--------|-------|------|--------|------|----|---------------------------------------------------------------------------------------------------------------------------------------------------------------------------------------------------------------------------------------------------------------------------------------------------------------------------------------------------------------------------------------------------------------------------------------------------------------------------------------------------------------------------|
| NGO0177 | 0.2488 | 1.88 | up | 0.8124 | 1.11  | up   | 0.3355 | 1.37 | up | putative two-component system transcriptional response regulator\ Context:(NC_002946)-[180058-180735]\ Notes:Best Blastp Hit: pir    H81180 DNA-binding response regulator NMB0595 [imported] - Neisseria meningitidis (group B strain MD58; group A strain Z2491) >gi 7225825 gb AAF41023.1  (AE002415) DNA-binding response regulator [Neisseria meningitidis MC58] >gi 7379518 emb CAB84081.1  (AL162754) putative two-component system regulator [Neisseria meningitidis] COG0745 Response regulators consisting of a |
| NGO0178 | 0.1947 | 3.44 | up | 0.6080 | 2.00  | up   | 0.1756 | 6.08 | up | hypothetical protein\ Context:(NC_002946)-[180925-182739]\ Notes:Best Blastp Hit: pir    A81181 hypothetical protein NMB0596 [imported] - Neisseria meningitidis (group B strain MD58) >gi 7225826 gb AAF41024.1  (AE002415) hypothetical protein [Neisseria meningitidis MC58]                                                                                                                                                                                                                                           |
| NGO0179 | 0.3542 | 2.33 | up | 0.5607 | -1.92 | down | 0.8651 | 1.09 | up | hypothetical protein\ Context:(NC_002946)-[182729-183082]\ Notes:Best Blastp Hit: pir    B81181 hypothetical protein NMB0597 [imported] - Neisseria meningitidis (group B strain MD58) >gi 7225827 gb AAF41025.1  (AE002415) hypothetical protein [Neisseria meningitidis MC58]                                                                                                                                                                                                                                           |
| NGO0180 | 0.0329 | 5.02 | up | 0.1393 | 7.11  | up   | 0.8040 | 1.14 | up | hypothetical protein\ Context:(NC_002946)-[183091-183738]\ Notes:Best Blastp Hit: pir    C81181 Maf/YceF/YhdE family protein NMB0598 [imported] - Neisseria meningitidis (group B strain MD58) >gi 7225828 gb AAF41026.1  (AE002415) Maf/YceF/YhdE family protein [Neisseria meningitidis MC58] COG0424 Putative inhibitor of septum formation                                                                                                                                                                            |
| NGO0181 | 0.1453 | 3.70 | up | 0.2443 | 4.94  | up   | 0.1075 | 1.63 | up | putative sec-independent protein translocase component\ Context:(NC_002946)-[183743-184513]\ Notes:Best Blastp Hit: pir    C81925 probable sec-independent protein translocase component NMA0803 [imported] - Neisseria meningitidis (group A strain Z2491) >gi 7379523 emb CAB84086.1  (AL162754) putative sec-independent protein translocase component [Neisseria meningitidis] COG0805 Sec-independent protein secretion pathway                                                                                      |



|         |        |      |    |        |      |    |        |       |      |                                                                                                                                                                                                                                                                                                                                                                                                                                     |
|---------|--------|------|----|--------|------|----|--------|-------|------|-------------------------------------------------------------------------------------------------------------------------------------------------------------------------------------------------------------------------------------------------------------------------------------------------------------------------------------------------------------------------------------------------------------------------------------|
| NGO0182 | 0.2283 | 2.00 | up | 0.3090 | 1.39 | up | 0.6748 | -1.11 | down | putative sec-independent protein translocase component\<br>Context:(NC_002946)-[184526-185212]\ Notes:Best Blastp<br>Hit: pir   E81181 hypothetical protein NMB0600 [imported]<br>- Neisseria meningitidis (group B strain MD58)<br>>gi 7225830 gb AAF41028.1  (AE002415) hypothetical<br>protein [Neisseria meningitidis MC58]                                                                                                     |
| NGO0183 | 0.1219 | 2.48 | up | 0.3043 | 1.47 | up | 0.2030 | 1.46  | up   | hypothetical protein\<br>Context:(NC_002946)-[185216-<br>185419]\ Notes:Best Blastp Hit: sp P57049 TATA_NEIMA<br>Sec-independent protein translocase protein TATA/E<br>homolog >gi 7379525 emb CAB84088.1  (AL162754)<br>putative sec-independent protein translocase component<br>[Neisseria meningitidis] COG1826 Component of Sec-<br>independent protein                                                                        |
| NGO0184 | 0.3822 | 1.61 | up | 0.6172 | 1.22 | up | 0.7012 | 1.12  | up   | HitA\<br>Context:(NC_002946)-[185466-185789]\ Notes:Best<br>Blastp Hit: sp O07817 HITA_NEIGO HITA protein<br>>gi 2197079 gb AAB61288.1  (AF003550) HitA [Neisseria<br>gonorrhoeae] COG0537 Diadenosine tetraphosphate<br>(Ap4A) hydrolase; putative histidine triad-family protein                                                                                                                                                  |
| NGO0185 | 0.2308 | 1.99 | up | 0.7748 | 1.11 | up | 0.8236 | 1.06  | up   | putative phosphoribosyl-ATP cyclohydrolase\<br>Context:(NC_002946)-[185863-186186]\ Notes:Best Blastp<br>Hit: pir   G81925 probable phosphoribosyl-ATP<br>pyrophosphatase (EC 3.6.1.31) NMA0807 [similarity] -<br>Neisseria meningitidis (group A strain Z2491)<br>>gi 7379527 emb CAB84090.1  (AL162754) putative<br>phosphoribosyl-ATP cyclohydrolase [Neisseria meningitidis]<br>COG0140 Phosphoribosyl-ATP pyrophosphohydrolase |
| NGO0186 | 0.0928 | 3.04 | up | 0.0358 | 2.33 | up | 0.1463 | 2.11  | up   | putative zinc-binding alcohol dehydrogenas\<br>Context:(NC_002946)-[186327-187391]\ Notes:Best Blastp<br>Hit: pir   H81925 probable alcohol dehydrogenase (EC<br>1.1.1.-) NMA0808 [similarity] - Neisseria meningitidis (group<br>A strain Z2491) >gi 7379528 emb CAB84091.1 <br>(AL162754) putative zinc-binding alcohol dehydrogenase<br>[Neisseria meningitidis] COG1065 Zn-dependent<br>oxidoreductases                         |

|         |        |       |      |        |       |      |        |       |      |                                                                                                                                                                                                                                                                                                                                                                                                                                                                   |
|---------|--------|-------|------|--------|-------|------|--------|-------|------|-------------------------------------------------------------------------------------------------------------------------------------------------------------------------------------------------------------------------------------------------------------------------------------------------------------------------------------------------------------------------------------------------------------------------------------------------------------------|
| NGO0187 | 0.7947 | -1.27 | down | 0.0428 | -7.92 | down | 0.5159 | -1.67 | down | hypothetical protein\ Context:(NC_002946)-[188256-189374]\ Notes:Best Blastp Hit: gb AAF41032.1  (AE002416) histone deacetylase family protein [Neisseria meningitidis MC58] COG0123 Deacetylases; including yeast histone                                                                                                                                                                                                                                        |
| NGO0188 | 0.1143 | 2.52  | up   | 0.1662 | 1.63  | up   | 0.3352 | 1.48  | up   | hypothetical protein\ Context:(NC_002946)+[189505-189771]\ Notes:Best Blastp Hit: gb AAF41033.1  (AE002416) conserved hypothetical protein [Neisseria meningitidis MC58] COG1862 Uncharacterized secreted proteins; YajC                                                                                                                                                                                                                                          |
| NGO0189 | 0.0435 | 3.16  | up   | 0.0349 | 2.24  | up   | 0.2684 | 1.46  | up   | preprotein translocase subunit SecD\ Context:(NC_002946)+[189979-191835]\ Notes:part of the preprotein secretory system; when complexed with proteins SecF and YajC; SecDFyajC stimulates the proton motive force-driven protein translocation; and appears to be required for the release of mature proteins from the extracytoplasmic side of the membrane                                                                                                      |
| NGO0190 | 0.0219 | 4.38  | up   | 0.0937 | 5.02  | up   | 0.1428 | 1.64  | up   | preprotein translocase subunit SecF\ Context:(NC_002946)+[191839-192774]\ Notes:forms a complex with SecD and YajC; SecDFyajC stimulates the proton motive force-driven protein translocation; seems to modulate the cycling of SecA by stabilizing its membrane-inserted state and appears to be required for the release of mature proteins from the extracytoplasmic side of the membrane; in some organisms; such as Bacillus subtilis; SecD is fused to SecF |
| NGO0191 | 0.3547 | 2.28  | up   | 0.2745 | -1.56 | down | 0.5312 | -1.19 | down | 30S ribosomal protein S15\ Context:(NC_002946)+[192979-193248]\ Notes:primary rRNA binding protein; helps nucleate assembly of 30S; binds directly to the 16S rRNA and an intersubunit bridge to the 23S rRNA; autoregulates translation through interactions with the mRNA leader sequence                                                                                                                                                                       |
| NGO0192 | 0.6086 | -1.25 | down | 0.7796 | -1.13 | down | 0.3856 | -1.53 | down | putative ABC transporter; ATP-binding protein; polyamine\ Context:(NC_002946)+[193358-194650]\ Notes:Best Blastp Hit: gb AAF41037.1  (AE002416) spermidine/putrescine ABC transporter; ATP-binding protein [Neisseria meningitidis MC58] COG1128 ABC-type spermidine/putrescine transport                                                                                                                                                                         |

|         |        |        |      |        |        |      |        |       |      |                                                                                                                                                                                                                                                                                                                                                                                                                                                                |
|---------|--------|--------|------|--------|--------|------|--------|-------|------|----------------------------------------------------------------------------------------------------------------------------------------------------------------------------------------------------------------------------------------------------------------------------------------------------------------------------------------------------------------------------------------------------------------------------------------------------------------|
| NGO0195 | 0.1180 | -2.19  | down | 0.1490 | -3.21  | down | 0.5107 | -1.27 | down | putative ABC transporter; permease protein; polyamine\<br>Context:(NC_002946)+[194984-195949]\ Notes:Best Blastp<br>Hit: gb AAF41038.1  (AE002416) spermidine/putrescine<br>ABC transporter; permease protein [Neisseria meningitidis<br>MC58] COG1176 ABC-type spermidine/putrescine transport                                                                                                                                                                |
| NGO0196 | 0.0590 | 3.45   | up   | 0.4998 | 1.38   | up   | 0.7063 | 1.10  | up   | putative ABC transporter; permease protein; polyamine\<br>Context:(NC_002946)+[195949-196836]\ Notes:Best Blastp<br>Hit: pir   E81179 spermidine/putrescine ABC transporter;<br>permease protein NMB0612 [imported] - Neisseria<br>meningitidis (group B strain MD58)<br>>gi 7225842 gb AAF41039.1  (AE002416)<br>spermidine/putrescine ABC transporter; permease protein<br>[Neisseria meningitidis MC58] COG1177 ABC-type<br>spermidine/putrescine transport |
| NGO0197 | 0.1992 | -3.95  | down | 0.0982 | -5.29  | down | 0.3851 | 1.34  | up   | putative oxidoreductase\<br>Context:(NC_002946)+[196858-<br>198258]\ Notes:Best Blastp Hit: possible phase variable - 8T<br>residue homopolymer repeat in the coding sequence (ON)<br>COG0665 Predicted oxidoreductases                                                                                                                                                                                                                                        |
| NGO0198 | 0.0078 | -15.54 | down | 0.0026 | -13.55 | down | 0.0279 | -4.88 | down | putative transporter; ammonium\<br>Context:(NC_002946)-<br>[198352-199818]\ Notes:Best Blastp Hit: possibly phase<br>variable - 8A residue homopolymer repeat in the coding<br>sequence (ON) COG0004 Ammonia permeases                                                                                                                                                                                                                                         |
| NGO0199 | 0.8733 | 1.11   | up   | 0.2295 | 1.65   | up   | 0.7947 | 1.08  | up   | transcription termination factor Rho\<br>Context:(NC_002946)-<br>[200272-201531]\ Notes:An RNA-DNA helicase that actively<br>releases nascent mRNAs from paused transcription<br>complexes                                                                                                                                                                                                                                                                     |
| NGO0200 | 0.6040 | 1.42   | up   | 0.7894 | 1.11   | up   | 0.3727 | 1.39  | up   | phosphoenolpyruvate synthase\<br>Context:(NC_002946)-<br>[201752-204136]\ Notes:catalyzes the formation of<br>phosphoenolpyruvate from pyruvate                                                                                                                                                                                                                                                                                                                |
| NGO0202 | 0.8908 | 1.07   | up   | 0.9523 | 1.02   | up   | 0.6954 | 1.11  | up   | hypothetical protein\<br>Context:(NC_002946)+[205270-<br>206091]\ Notes:Best Blastp Hit: pir   H81177 conserved<br>hypothetical protein NMB0619 [imported] - Neisseria<br>meningitidis (group B strain MD58)<br>>gi 7225849 gb AAF41045.1  (AE002417) conserved<br>hypothetical protein [Neisseria meningitidis MC58]<br>COG1806 Uncharacterized BCR; YdiA family                                                                                              |

|         |        |       |      |        |        |      |        |       |      |                                                                                                                                                                                                                                                                                                                                                                                                                                                                                                                         |
|---------|--------|-------|------|--------|--------|------|--------|-------|------|-------------------------------------------------------------------------------------------------------------------------------------------------------------------------------------------------------------------------------------------------------------------------------------------------------------------------------------------------------------------------------------------------------------------------------------------------------------------------------------------------------------------------|
| NGO0203 | 0.0109 | -4.70 | down | 0.0223 | -2.74  | down | 0.1775 | -2.05 | down | putative phosphatase\ Context:(NC_002946)-[206177-206887]\ Notes:Best Blastp Hit: gb AAF41046.1  (AE002417) phosphoglycolate phosphatase [Neisseria meningitidis MC58] COG0546 Predicted phosphatases                                                                                                                                                                                                                                                                                                                   |
| NGO0204 | 0.7799 | 1.31  | up   | 0.0307 | -16.97 | down | 0.2371 | -2.42 | down | hypothetical protein\ Context:(NC_002946)-[206877-207704]\ Notes:Best Blastp Hit: pir   B81178 conserved hypothetical protein NMB0621 [imported] - Neisseria meningitidis (group B strain MD58)<br>>gi 7225851 gb AAF41047.1  (AE002417) conserved hypothetical protein [Neisseria meningitidis MC58]                                                                                                                                                                                                                   |
| NGO0205 | 0.0180 | -4.76 | down | 0.0013 | -15.18 | down | 0.1195 | -2.64 | down | LolA\ Context:(NC_002946)+[208087-208710]\ Notes:Best Blastp Hit: sp P57068 LOLA_NEIMB outer-membrane lipoproteins carrier protein precursor<br>>gi 11281795 pir   C81178 outer membrane lipoprotein carrier protein NMB0622 [imported] - Neisseria meningitidis (group B strain MD58)<br>>gi 7225852 gb AAF41048.1  (AE002417) outer membrane lipoprotein carrier protein [Neisseria meningitidis MC58]; putative lipoprotein carrier precursor; periplasmic binding                                                   |
| NGO0206 | 0.0421 | 3.79  | up   | 0.0824 | 1.92   | up   | 0.3965 | 1.29  | up   | putative ABC transporter; periplasmic binding protein; polyamine\ Context:(NC_002946)+[208983-210119]\ Notes:Best Blastp Hit: pir   D81176 spermidine/putrescine ABC transporter; periplasmic spermidine/putrescine-binding protein NMB0623 [imported] - Neisseria meningitidis (group B strain MD58)<br>>gi 7225854 gb AAF41049.1  (AE002418) spermidine/putrescine ABC transporter; periplasmic spermidine/putrescine-binding protein [Neisseria meningitidis MC58] COG0687 Spermidine/putrescine-binding periplasmic |
| NGO0207 | 0.1063 | 2.97  | up   | 0.1719 | 1.71   | up   | 0.5896 | 1.17  | up   | putative sugar transferase\ Context:(NC_002946)+[210214-211197]\ Notes:Best Blastp Hit: possibly phase variable - 5 tandem repeats of CAAACAC in the coding sequence (ON) COG0463 Glycosyl transferases involved in cell wall                                                                                                                                                                                                                                                                                           |

|         |        |       |      |        |       |      |        |       |      |                                                                                                                                                                                                                                                                                                                                                                                                   |
|---------|--------|-------|------|--------|-------|------|--------|-------|------|---------------------------------------------------------------------------------------------------------------------------------------------------------------------------------------------------------------------------------------------------------------------------------------------------------------------------------------------------------------------------------------------------|
| NGO0208 | 0.8904 | -1.07 | down | 0.9170 | -1.05 | down | 0.8114 | -1.07 | down | hypothetical protein\ Context:(NC_002946)+[211238-211768]\ Notes:Best Blastp Hit: pir    E81176 conserved hypothetical protein NMB0625 [imported] - Neisseria meningitidis (group B strain MD58)<br>>gi 7225855 gb AAF41050.1  (AE002418) conserved hypothetical protein [Neisseria meningitidis MC58]<br>COG0663 Carbonic anhydrases/acetyltransferases                                          |
| NGO0209 | 0.2466 | -2.30 | down | 0.9803 | 1.01  | up   | 0.6071 | -1.40 | down | peptide chain release factor 3\ Context:(NC_002946)-[211936-213531]\ Notes:stimulates the release of release factors 1 and 2 from the ribosome after hydrolysis of the ester bond in peptidyl-tRNA has occurred; GDP/GTP-binding protein                                                                                                                                                          |
| NGO0210 | 0.3167 | 2.07  | up   | 0.5073 | -1.28 | down | 0.8059 | -1.10 | down | phosphoribosyl-AMP cyclohydrolase\ Context:(NC_002946)-[213638-214033]\ Notes:PR-AMP cyclohydrolase; functions in histidine biosynthesis from PRPP; converts 1-(5-phosphoribosyl)-AMP to 1-(5-phosphoribosyl)-5-[(5-phosphoribosylamino)methylideneamino]imidazole-4-carboxamide during the histidine biosynthesis pathway; binds zinc and magnesium; forms homodimers                            |
| NGO0211 | 0.7221 | 1.16  | up   | 0.5207 | 1.24  | up   | 0.4071 | -1.44 | down | imidazole glycerol phosphate synthase subunit HisF\ Context:(NC_002946)-[214064-214831]\ Notes:catalyzes the conversion of 5-[(5-phospho-1-deoxyribulos-1-ylamino)methylideneamino]- 1-(5-phosphoribosyl)imidazole-4-carboxamideand glutamine to imidazole-glycerolphosphate; 5-aminoimidazol-4-carboxamideribonucleotide and glutamate; the HisF subunit acts as a cyclase                       |
| NGO0212 | 0.9883 | -1.01 | down | 0.5968 | -1.23 | down | 0.8723 | 1.04  | up   | 1-(5-phosphoribosyl)-5-[(5-phosphoribosylamino)methylideneamino] imidazole-4-carboxamide isomerase\ Context:(NC_002946)-[214844-215581]\ Notes:catalyzes the formation of 5-(5-phospho-1-deoxyribulos-1-ylamino)methylideneamino-l- (5-phosphoribosyl)imidazole-4-carboxamide from 1-(5-phosphoribosyl)-5-[(5-phosphoribosyl)-5-[(5-phosphoribosylamino)methylideneamino] imidazole-4-carboxamide |

|         |        |       |      |        |       |      |        |       |      |                                                                                                                                                                                                                                                                                                                                                                                                                                                                                                                                                                                                                      |
|---------|--------|-------|------|--------|-------|------|--------|-------|------|----------------------------------------------------------------------------------------------------------------------------------------------------------------------------------------------------------------------------------------------------------------------------------------------------------------------------------------------------------------------------------------------------------------------------------------------------------------------------------------------------------------------------------------------------------------------------------------------------------------------|
| NGO0213 | 0.1644 | -2.04 | down | 0.1818 | -2.01 | down | 0.3163 | -1.63 | down | imidazole glycerol phosphate synthase subunit HisH\<br>Context:(NC_002946)-[215614-216252]\ Notes:with HisF<br>IGPS catalyzes the conversion of phosphoribulosyl-<br>formimino-5-aminoimidazole-4-carboxamide<br>ribonucleotide phosphate and glutamine to imidazole-<br>glycerol phosphate; 5-aminoimidazol-4-carboxamide<br>ribonucleotide; and glutamate in histidine biosynthesis; the<br>HisH subunit provides the glutamine amidotransferase<br>activity that produces the ammonia necessary to HisF for<br>the synthesis of imidazole-glycerol phosphate and 5-<br>aminoimidazol-4-carboxamide ribonucleotide |
| NGO0214 | 0.8124 | -1.12 | down | 0.5077 | -1.37 | down | 0.5883 | -1.18 | down | putative phosphotransacetylase\<br>Context:(NC_002946)-<br>[216382-217884]\ Notes:Best Blastp Hit:<br>emb CAB84122.1  (AL162754) putative phosphate<br>acyltransferase [Neisseria meningitidis] COG0280<br>Phosphotransacetylase                                                                                                                                                                                                                                                                                                                                                                                     |
| NGO0215 | 0.0956 | 2.92  | up   | 0.1078 | 5.94  | up   | 0.0269 | 2.86  | up   | ABC transporter; ATP-binding protein; iron related\<br>Context:(NC_002946)-[218069-219127]\ Notes:Best Blastp<br>Hit: emb CAB84123.1  (AL162754) putative iron-uptake<br>permease ATP-binding protein [Neisseria meningitidis]<br>COG1101 ATPase components of various transport; FbpC                                                                                                                                                                                                                                                                                                                               |
| NGO0216 | 0.0032 | 9.26  | up   | 0.1079 | 5.89  | up   | 0.0431 | 3.40  | up   | ABC transporter; permease protein; iron related\<br>Context:(NC_002946)-[219148-220677]\ Notes:Best Blastp<br>Hit: R] COG1081 Uncharacterized permeases                                                                                                                                                                                                                                                                                                                                                                                                                                                              |
| NGO0217 | 0.0388 | 5.24  | up   | 0.0077 | 3.41  | up   | 0.0185 | 4.05  | up   | ABC transporter; periplasmic binding protein; iron related\<br>Context:(NC_002946)-[220733-221728]\ Notes:Best Blastp<br>Hit: gb AAB63559.1  (U33937) binds iron in a manner<br>similar to transferrin; periplasmic iron-binding protein;<br>Method: conceptual translation supplied by author<br>[Neisseria gonorrhoeae] >gi 1588872 prf   2209379A fbpA<br>gene [Neisseria gonorrhoeae] COG1840 Thiamine-binding<br>periplasmic proteins; FbpA                                                                                                                                                                     |
| NGO0218 | 0.4096 | -1.58 | down | 0.5704 | -1.28 | down | 0.7171 | -1.15 | down | hypothetical protein\<br>Context:(NC_002946)-[222119-<br>222460]\ Notes:Best Blastp Hit: pir   A81175 hypothetical<br>protein NMB0636 [imported] - Neisseria meningitidis<br>(group B strain MD58) >gi 7225865 gb AAF41059.1 <br>(AE002419) hypothetical protein [Neisseria meningitidis<br>MC58]                                                                                                                                                                                                                                                                                                                    |

|         |        |       |      |        |       |      |        |       |      |                                                                                                                                                                                                                                                                                                                                                                                                        |
|---------|--------|-------|------|--------|-------|------|--------|-------|------|--------------------------------------------------------------------------------------------------------------------------------------------------------------------------------------------------------------------------------------------------------------------------------------------------------------------------------------------------------------------------------------------------------|
| NGO0219 | 0.7285 | 1.24  | up   | 0.8041 | 1.08  | up   | 0.3637 | 1.60  | up   | argininosuccinate lyase\ Context:(NC_002946)-[222518-223894]\ Notes:catalyzes the formation of arginine from (N-L-arginino)succinate                                                                                                                                                                                                                                                                   |
| NGO0220 | 0.8729 | -1.08 | down | 0.8456 | -1.07 | down | 0.9203 | 1.03  | up   | putative UTP--glucose-1-phosphate uridylyltransferase\ Context:(NC_002946)-[223913-224782]\ Notes:Best Blastp Hit: pir    C81175 UTP--glucose-1-phosphate uridylyltransferase NMB0638 [imported] - Neisseria meningitidis (group B strain MD58) >gi 7225867 gb AAF41061.1  (AE002419) UTP--glucose-1-phosphate uridylyltransferase [Neisseria meningitidis MC58] COG1210 UDP-glucose pyrophosphorylase |
| NGO0221 | 0.0470 | -3.82 | down | 0.2558 | -1.64 | down | 0.2274 | -2.08 | down | putative deoxyribonucleotide triphosphate pyrophosphatase\ Context:(NC_002946)-[224810-225409]\ Notes:HAM1-like protein; Rec-dependent growth; RgdB; yggV; it is suspected that this protein functions to remove misincorporated bases such as xanthine or hypoxanthine                                                                                                                                |
| NGO0222 | 0.6589 | -1.29 | down | 0.8707 | -1.07 | down | 0.5166 | 1.18  | up   | hypothetical protein\ Context:(NC_002946)-[225402-225635]\ Notes:Best Blastp Hit: gb AAF41063.1  (AE002419) hypothetical protein [Neisseria meningitidis MC58]                                                                                                                                                                                                                                         |
| NGO0223 | 0.1697 | 2.06  | up   | 0.3253 | 1.46  | up   | 0.4693 | 1.28  | up   | inorganic pyrophosphatase\ Context:(NC_002946)-[225743-226276]\ Notes:catalyzes the hydrolysis of pyrophosphate to phosphate                                                                                                                                                                                                                                                                           |
| NGO0224 | 0.0289 | -3.34 | down | 0.2296 | -1.70 | down | 0.2475 | -1.47 | down | dATP pyrophosphohydrolase\ Context:(NC_002946)-[226378-226836]\ Notes:converts dATP to dAMP and pyrophosphate                                                                                                                                                                                                                                                                                          |
| NGO0225 | 0.6803 | 1.32  | up   | 0.3684 | 1.33  | up   | 0.9838 | -1.01 | down | MafB1\ Context:(NC_002946)+[227386-229272]\ Notes:Best Blastp Hit: gb AAF62313.1  (AE002419) MafB-related protein [Neisseria meningitidis MC58]; putative MafB-like protein                                                                                                                                                                                                                            |
| NGO0226 | 0.5653 | 1.36  | up   | 0.8987 | 1.06  | up   | 0.4681 | -1.29 | down | hypothetical protein\ Context:(NC_002946)+[229300-229722]\ Notes:Best Blastp Hit: pir    C81176 hypothetical protein NMB0648 [imported] - Neisseria meningitidis (group B strain MD58) >gi 7225875 gb AAF41069.1  (AE002419) hypothetical protein [Neisseria meningitidis MC58]                                                                                                                        |

|         |        |       |      |        |       |      |        |       |      |                                                                                                                                                                                                                                                                                                                                                                                             |
|---------|--------|-------|------|--------|-------|------|--------|-------|------|---------------------------------------------------------------------------------------------------------------------------------------------------------------------------------------------------------------------------------------------------------------------------------------------------------------------------------------------------------------------------------------------|
| NGO0227 | 0.6811 | 1.26  | up   | 0.7498 | -1.14 | down | 0.3581 | -1.35 | down | hypothetical protein\ Context:(NC_002946)+[230200-230445]\ Notes:Best Blastp Hit: emb CAB84136.1  (AL162754) hypothetical protein NMA0855 [Neisseria meningitidis]                                                                                                                                                                                                                          |
| NGO0228 | 0.8241 | -1.16 | down | 0.4078 | -1.49 | down | 0.3840 | -1.44 | down | hypothetical protein\ Context:(NC_002946)+[230448-230834]\ Notes:Best Blastp Hit: pir   E81931 hypothetical protein NMA0857 [imported] - Neisseria meningitidis (group A strain Z2491) >gi 7379573 emb CAB84138.1  (AL162754) hypothetical protein NMA0857 [Neisseria meningitidis]                                                                                                         |
| NGO0229 | 0.1710 | -2.16 | down | 0.1337 | -2.01 | down | 0.1722 | -2.48 | down | hypothetical protein\ Context:(NC_002946)+[231055-231444]\ Notes:Best Blastp Hit: possibly phase variable - 8A residue homopolymer repeat in the coding sequence (ON)                                                                                                                                                                                                                       |
| NGO0230 | 0.0194 | 4.54  | up   | 0.4108 | -1.84 | down | 0.5431 | -1.39 | down | putative transport protein; potassium\ Context:(NC_002946)-[231484-232941]\ Notes:Best Blastp Hit: pir   G81931 probable transmembrane potassium transporter NMA0859 [imported] - Neisseria meningitidis (group A strain Z2491) >gi 7379575 emb CAB84140.1  (AL162754) putative transmembrane potassium transporter [Neisseria meningitidis] COG0168 Potassium uptake system component TrkG |
| NGO0231 | 0.8161 | 1.11  | up   | 0.8337 | -1.08 | down | 0.1533 | 1.50  | up   | diadenosine tetrphosphatase\ Context:(NC_002946)-[232956-233786]\ Notes:hydrolyzes P(1);P(4)-bis(5'-adenosyl) tetrphosphate to form 2 ADP                                                                                                                                                                                                                                                   |
| NGO0232 | 0.0765 | 2.45  | up   | 0.1586 | 1.59  | up   | 0.1907 | 1.46  | up   | hypothetical protein\ Context:(NC_002946)-[233863-234252]\ Notes:Best Blastp Hit: pir   F81174 ribonuclease; probable NMB0662 [imported] - Neisseria meningitidis (group B strain MD58) >gi 7225887 gb AAF41080.1  (AE002420) ribonuclease; putative [Neisseria meningitidis MC58] COG0251 Putative translation initiation inhibitor                                                        |
| NGO0233 | 0.9091 | 1.08  | up   | 0.9882 | -1.00 | down | 0.9668 | -1.02 | down | outer membrane protein\ Context:(NC_002946)-[234399-234926]\ Notes:Best Blastp Hit: gb AAB41581.1  (U52069) outer membrane protein [Neisseria gonorrhoeae]                                                                                                                                                                                                                                  |



|         |        |       |      |        |        |      |        |       |      |                                                                                                                                                                                                                                                                                                                                                                |
|---------|--------|-------|------|--------|--------|------|--------|-------|------|----------------------------------------------------------------------------------------------------------------------------------------------------------------------------------------------------------------------------------------------------------------------------------------------------------------------------------------------------------------|
| NGO0234 | 0.2403 | 2.05  | up   | 0.6198 | -1.59  | down | 0.5747 | 1.37  | up   | coproporphyrinogen III oxidase\ Context:(NC_002946)-[235369-236544]\ Notes:catalyzes the oxygen-independent formation of protoporphyrinogen-IX from coproporphyrinogen-III                                                                                                                                                                                     |
| NGO0235 | 0.5487 | -1.48 | down | 0.3141 | -2.07  | down | 0.7192 | 1.41  | up   | putative DNA ligase\ Context:(NC_002946)-[236601-239072]\ Notes:Best Blastp Hit: pir   F81172 DNA ligase NMB0666 [imported] - Neisseria meningitidis (group B strain MD58) >gi 7225892 gb AAF41084.1  (AE002421) DNA ligase [Neisseria meningitidis MC58] COG0272 NAD-dependent DNA ligase (contains BRCT                                                      |
| NGO0236 | 0.1654 | 2.18  | up   | 0.0195 | 4.53   | up   | 0.0828 | 2.57  | up   | hypothetical protein\ Context:(NC_002946)-[239206-240492]\ Notes:Best Blastp Hit: pir   G81172 hypothetical protein NMB0667 [imported] - Neisseria meningitidis (group B strain MD58) >gi 7225893 gb AAF41085.1  (AE002421) hypothetical protein [Neisseria meningitidis MC58]                                                                                 |
| NGO0237 | 0.0095 | -6.43 | down | 0.0083 | -16.59 | down | 0.0705 | -3.28 | down | N-acetyl-anhydromuramyl-L-alanine amidase\ Context:(NC_002946)-[240686-241258]\ Notes:Best Blastp Hit: pir   F81932 probable anhydro-N-acetylmuramyl-tripeptide amidase NMA0867 [imported] - Neisseria meningitidis (group A strain Z2491) >gi 7379582 emb CAB84147.1  (AL162754) putative anhydro-N-acetylmuramyl-tripeptide amidase [Neisseria meningitidis] |
| NGO0238 | 0.4916 | -1.40 | down | 0.2692 | -1.81  | down | 0.2483 | -1.55 | down | hypothetical protein\ Context:(NC_002946)+[241342-242289]\ Notes:Best Blastp Hit: pir   A81173 conserved hypothetical protein NMB0669 [imported] - Neisseria meningitidis (group B strain MD58) >gi 7225895 gb AAF41087.1  (AE002421) conserved hypothetical protein [Neisseria meningitidis MC58] COG1559 Uncharacterized BCR; YceG family                    |
| NGO0239 | 0.6812 | 1.24  | up   | 0.9971 | -1.00  | down | 0.0263 | -2.41 | down | thymidylate kinase\ Context:(NC_002946)+[242398-243018]\ Notes:catalyzes the reversible phosphoryl transfer from adenosine triphosphate (ATP) to thymidine monophosphate (dTMP) to form thymidine diphosphate (dTDP)                                                                                                                                           |

|         |        |        |      |        |       |      |        |       |      |                                                                                                                                                                                                                                                                                                                                                                                                                         |
|---------|--------|--------|------|--------|-------|------|--------|-------|------|-------------------------------------------------------------------------------------------------------------------------------------------------------------------------------------------------------------------------------------------------------------------------------------------------------------------------------------------------------------------------------------------------------------------------|
| NGO0240 | 0.2744 | -1.80  | down | 0.2075 | -1.81 | down | 0.5652 | -1.22 | down | putative malic enzyme; malate dehydrogenase/oxaloacetate-decarboxylating\<br>Context:(NC_002946)+[243240-244520]\ Notes:Best Blastp Hit: pir   A81933 probable malate dehydrogenase (oxaloacetate-decarboxylating) (EC 1.1.1.38) NMA0870 [imported] - Neisseria meningitidis (group A strain Z2491) >gi 7379585 emb CAB84150.1  (AL162754) putative malate oxidoreductase [Neisseria meningitidis] COG0281 Malic enzyme |
| NGO0241 | 0.5726 | 1.33   | up   | 0.6886 | 1.37  | up   | 0.2238 | -1.68 | down | hypothetical protein\<br>Context:(NC_002946)+[244633-244836]\ Notes:Best Blastp Hit: emb CAB84151.1  (AL162754) hypothetical protein NMA0871 [Neisseria meningitidis]                                                                                                                                                                                                                                                   |
| NGO0242 | 0.0038 | -11.53 | down | 0.0067 | -9.40 | down | 0.0806 | -3.27 | down | tetraacyldisaccharide 4'-kinase\<br>Context:(NC_002946)+[244922-245953]\ Notes:transfers the gamma-phosphate of ATP to the 4' position of a tetraacyldisaccharide 1-phosphate intermediate to form tetraacyldisaccharide 1;4'-bis-phosphate                                                                                                                                                                             |
| NGO0243 | 0.8190 | -1.16  | down | 0.9597 | -1.02 | down | 0.2259 | -1.60 | down | hypothetical protein\<br>Context:(NC_002946)+[246159-246692]\ Notes:Best Blastp Hit: pir   G81170 probable periplasmic protein NMA0873 [imported] - Neisseria meningitidis (group B strain MD58; group A strain Z2491) >gi 7225900 gb AAF41091.1  (AE002422) hypothetical protein [Neisseria meningitidis MC58] >gi 7379588 emb CAB84153.1  (AL162754) putative periplasmic protein [Neisseria meningitidis]            |
| NGO0244 | 0.7547 | 1.17   | up   | 0.9414 | -1.03 | down | 0.5908 | -1.22 | down | hypothetical protein\<br>Context:(NC_002946)+[246914-247096]\ Notes:Best Blastp Hit: possibly phase variable - 8A residue homopolymer repeat in the coding sequence (ON)                                                                                                                                                                                                                                                |
| NGO0245 | 0.8919 | -1.06  | down | 0.3337 | -1.55 | down | 0.6012 | -1.14 | down | 3-deoxy-manno-octulosonate cytidyltransferase\<br>Context:(NC_002946)+[247093-247854]\ Notes:CMP-2-keto-3-deoxyoctulosonic acid synthetase; catalyzes the formation of CMP-3-deoxy-D-manno-octulosonate from CTP and 3-deoxy-D-manno-octulosonate which is incorporated into LPS                                                                                                                                        |

|         |        |       |      |        |       |      |        |       |      |                                                                                                                                                                                                                                                                                      |
|---------|--------|-------|------|--------|-------|------|--------|-------|------|--------------------------------------------------------------------------------------------------------------------------------------------------------------------------------------------------------------------------------------------------------------------------------------|
| NGO0246 | 0.9392 | -1.04 | down | 0.3412 | -1.37 | down | 0.6581 | -1.13 | down | hypothetical protein\ Context:(NC_002946)+[247877-248173]\ Notes:Best Blastp Hit: pir    G81933 hypothetical protein NMA0876 [imported] - Neisseria meningitidis (group A strain Z2491) >gi 7379591 emb CAB84156.1  (AL162754) hypothetical protein NMA0876 [Neisseria meningitidis] |
| NGO0247 | 0.0056 | -6.59 | down | 0.0055 | -3.36 | down | 0.0021 | -3.77 | down | hypothetical protein\ Context:(NC_002946)+[248228-248392]\ Notes:Best Blastp Hit: emb CAB84157.1  (AL162754) hypothetical protein NMA0877 [Neisseria meningitidis]                                                                                                                   |
| NGO0248 | 0.3742 | -1.56 | down | 0.7941 | -1.14 | down | 0.1382 | -2.10 | down | tryptophan synthase subunit alpha\ Context:(NC_002946)+[248915-249700]\ Notes:catalyzes the formation of indole and glyceraldehyde 3-phosphate from indoleglycerol phosphate in tryptophan biosynthesis                                                                              |
| NGO0249 | 0.6910 | -1.19 | down | 0.3200 | -1.66 | down | 0.1954 | -1.49 | down | acetyl-CoA carboxylase subunit beta\ Context:(NC_002946)+[249737-250609]\ Notes:catalyzes the carboxylation of acetyl-CoA to malonyl-CoA; forms a tetramer of AccA2D2 subunits                                                                                                       |
| NGO0252 | 0.8282 | -1.18 | down | 0.3702 | 1.78  | up   | 0.4884 | -1.30 | down | hypothetical protein\ Context:(NC_002946)+[251643-252029]\ Notes:Best Blastp Hit: pir    F81934 probable lipoprotein NMA0883 [imported] - Neisseria meningitidis (group A strain Z2491) >gi 7379598 emb CAB84163.1  (AL162754) putative lipoprotein [Neisseria meningitidis]         |
| NGO0255 | 0.9076 | -1.06 | down | 0.0595 | -3.92 | down | 0.2539 | -1.85 | down | dihydroorotase\ Context:(NC_002946)+[253334-254368]\ Notes:catalyzes the formation of N-carbamoyl-L-aspartate from (S)-dihydroorotate in pyrimidine biosynthesis                                                                                                                     |
| NGO0256 | 0.0270 | -4.21 | down | 0.0189 | -4.07 | down | 0.4620 | -1.70 | down | transcription antitermination protein NusB\ Context:(NC_002946)-[254447-254872]\ Notes:Regulates rRNA biosynthesis by transcriptional antitermination                                                                                                                                |

|         |        |       |      |        |        |      |        |       |      |                                                                                                                                                                                                                                                                                                                                                                                                                                                                                                                                                                                                                                                                                                                                |
|---------|--------|-------|------|--------|--------|------|--------|-------|------|--------------------------------------------------------------------------------------------------------------------------------------------------------------------------------------------------------------------------------------------------------------------------------------------------------------------------------------------------------------------------------------------------------------------------------------------------------------------------------------------------------------------------------------------------------------------------------------------------------------------------------------------------------------------------------------------------------------------------------|
| NGO0257 | 0.3264 | 1.86  | up   | 0.4602 | 1.56   | up   | 0.4939 | -1.22 | down | riboflavin synthase subunit beta\ Context:(NC_002946)-[254950-255426]\ Notes:RibE; 6;7-diimethyl-8-ribityllumazine synthase; DMRL synthase; lumazine synthase; beta subunit of riboflavin synthase; condenses 5-amino-6-(1'-D)-ribityl-amino-2;4(1H;3H)-pyrimidinedione with L-3;4-dihydroxy-2-butanone-4-phosphate to generate 6;6-dimethyl-8-lumazine (DMRL); riboflavin synthase then uses 2 molecules of DMRL to produce riboflavin (vitamin B12); involved in the last steps of riboflavin biosynthesis; forms a 60mer (icosahedral shell) in both Bacillus subtilis and Escherichia coli; in Bacillus subtilis this 60mer is associated with the riboflavin synthase subunit (alpha) while in Escherichia coli it is not |
| NGO0258 | 0.5266 | -1.39 | down | 0.0980 | -2.28  | down | 0.5644 | -1.21 | down | hypothetical protein\ Context:(NC_002946)-[255473-255796]\ Notes:Best Blastp Hit: pir    C81172 hypothetical protein NMB0685 [imported] - Neisseria meningitidis (group B strain MD58) >gi   7225912  gb AAF41103.1   (AE002422) hypothetical protein [Neisseria meningitidis MC58]                                                                                                                                                                                                                                                                                                                                                                                                                                            |
| NGO0259 | 0.8666 | -1.12 | down | 0.5710 | -1.61  | down | 0.0004 | -6.27 | down | ribonuclease III\ Context:(NC_002946)+[255967-256686]\ Notes:cytoplasmic enzyme involved in processing rRNA and some mRNAs; substrates typically have dsRNA regions; forms a homodimer; have N-terminal nuclease and C-terminal RNA-binding domains; requires magnesium as preferred ion for activity;                                                                                                                                                                                                                                                                                                                                                                                                                         |
| NGO0260 | 0.0927 | 5.19  | up   | 0.6817 | -1.61  | down | 0.2449 | -2.28 | down | GTP-binding protein Era\ Context:(NC_002946)+[256721-257656]\ Notes:Era; Escherichia coli Ras-like protein; Bex; Bacillus Era-complementing segment; essential protein in Escherichia coli that is involved in many cellular processes; GTPase; binds the cell membrane through apparent C-terminal domain; mutants are arrested during the cell cycle; Streptococcus pneumoniae Era binds to RNA and Escherichia coli Era binds 16S rRNA and 30S ribosome                                                                                                                                                                                                                                                                     |
| NGO0261 | 0.0297 | -5.15 | down | 0.0001 | -36.92 | down | 0.0143 | -7.61 | down | N-(5'-phosphoribosyl)anthranilate isomerase\ Context:(NC_002946)-[260589-261215]\ Notes:catalyzes the formation of 1-(2-carboxyphenylamino)-1-deoxy-D-ribose 5-phosphate from N-(5-phospho-beta-D-ribose)-anthranilate in tryptophan biosynthesis                                                                                                                                                                                                                                                                                                                                                                                                                                                                              |

|         |        |       |      |        |       |      |        |       |      |                                                                                                                                                                                                                                                                                                                                                                                                                                                                                                 |
|---------|--------|-------|------|--------|-------|------|--------|-------|------|-------------------------------------------------------------------------------------------------------------------------------------------------------------------------------------------------------------------------------------------------------------------------------------------------------------------------------------------------------------------------------------------------------------------------------------------------------------------------------------------------|
| NGO0262 | 0.1138 | -4.69 | down | 0.0251 | -2.98 | down | 0.3736 | -1.56 | down | transcription elongation factor GreB\ Context:(NC_002946)-[261274-261765]\ Notes:necessary for efficient RNA polymerase transcription elongation past template-encoded arresting sites; arresting sites in DNA have the property of trapping a certain fraction of elongating RNA polymerases that pass through; resulting in locked ternary complexes. Cleavage of the nascent transcript by cleavage factors such as GreA or GreB allows the resumption of elongation from the new 3'terminus |
| NGO0263 | 0.0300 | -4.69 | down | 0.0299 | -3.57 | down | 0.0151 | -2.31 | down | amidophosphoribosyltransferase\ Context:(NC_002946)-[261865-263409]\ Notes:Catalyzes first step of the de novo purine nucleotide biosynthetic pathway                                                                                                                                                                                                                                                                                                                                           |
| NGO0264 | 0.0095 | 10.48 | up   | 0.0404 | 12.25 | up   | 0.1270 | 3.11  | up   | putative bacteriocin production protein\ Context:(NC_002946)-[263603-264100]\ Notes:Best Blastp Hit: gb AAF62316.1  (AE002423) colicin V production protein; putative [Neisseria meningitidis MC58] COG1286 Uncharacterized membrane protein; required                                                                                                                                                                                                                                          |
| NGO0265 | 0.1656 | 1.90  | up   | 0.0419 | 2.33  | up   | 0.1761 | 1.50  | up   | tetrapac protein\ Context:(NC_002946)-[264093-265133]\ Notes:Best Blastp Hit: emb CAA92429.1  (Z68205) tpc [Neisseria gonorrhoeae]                                                                                                                                                                                                                                                                                                                                                              |
| NGO0266 | 0.8744 | -1.07 | down | 0.7366 | -1.17 | down | 0.5472 | -1.18 | down | putative folylpolyglutamate synthase/dihydrofolate synthase\ Context:(NC_002946)-[265147-266421]\ Notes:Best Blastp Hit: pir   S63583 tetrahydrofolylpolyglutamate synthase (EC 6.3.2.17) / dihydrofolate synthase (EC 6.3.2.12) - Neisseria gonorrhoeae (strain MS11) >gi 1237077 emb CAA92428.1  (Z68205) folC [Neisseria gonorrhoeae] COG0285 Folylpolyglutamate synthase                                                                                                                    |
| NGO0267 | 0.3374 | 1.56  | up   | 0.9882 | -1.01 | down | 0.6304 | -1.14 | down | Foll\ Context:(NC_002946)-[266452-266892]\ Notes:Best Blastp Hit: pir   S63582 foll protein - Neisseria gonorrhoeae (strain MS11) >gi 1237076 emb CAA92427.1  (Z68205) foll [Neisseria gonorrhoeae]; putative folC transcriptional regulator                                                                                                                                                                                                                                                    |

|         |        |       |      |        |       |      |        |       |      |                                                                                                                                                                                                                                                                                                                                                                                                                               |
|---------|--------|-------|------|--------|-------|------|--------|-------|------|-------------------------------------------------------------------------------------------------------------------------------------------------------------------------------------------------------------------------------------------------------------------------------------------------------------------------------------------------------------------------------------------------------------------------------|
| NGO0268 | 0.6710 | -1.19 | down | 0.6509 | -1.23 | down | 0.2332 | -1.76 | down | hypothetical protein\ Context:(NC_002946)-[266897-267271]\ Notes:Best Blastp Hit: pir     D81936 hypothetical protein NMA0899 [imported] - Neisseria meningitidis (group A strain Z2491) >gi 7379612 emb CAB84177.1  (AL162754) hypothetical protein NMA0899 [Neisseria meningitidis]                                                                                                                                         |
| NGO0269 | 0.7041 | 1.23  | up   | 0.7622 | -1.15 | down | 0.8668 | -1.06 | down | putative ABC transporter; ATP-binding protein; amino acid\ Context:(NC_002946)-[267329-268057]\ Notes:Best Blastp Hit: pir     E81936 probable amino acid permease ATP-binding protein NMA0900 [imported] - Neisseria meningitidis (group A strain Z2491) >gi 7379613 emb CAB84178.1  (AL162754) putative amino acid permease ATP-binding protein [Neisseria meningitidis] COG1126 ABC-type polar amino acid transport system |
| NGO0270 | 0.8889 | 1.07  | up   | 0.9195 | 1.04  | up   | 0.2837 | -1.38 | down | hypothetical protein\ Context:(NC_002946)-[268099-268554]\ Notes:                                                                                                                                                                                                                                                                                                                                                             |
| NGO0271 | 0.5802 | 1.32  | up   | 0.2180 | 1.65  | up   | 0.8056 | -1.07 | down | hypothetical protein\ Context:(NC_002946)-[268665-269234]\ Notes:                                                                                                                                                                                                                                                                                                                                                             |
| NGO0272 | 0.3929 | 1.50  | up   | 0.9962 | 1.00  | up   | 0.8535 | 1.05  | up   | dimethyladenosine transferase\ Context:(NC_002946)-[269249-270028]\ Notes:catalyzes the transfer of a total of four methyl groups from S-adenosyl-l-methionine (S-AdoMet) to two adjacent adenosine bases A1518 and A1519 in 16S rRNA; mutations in ksgA causes resistance to the translation initiation inhibitor kasugamycin                                                                                                |
| NGO0274 | 0.0334 | -4.74 | down | 0.1160 | -2.36 | down | 0.0475 | -2.69 | down | tryptophan synthase subunit beta\ Context:(NC_002946)+[271016-272218]\ Notes:catalyzes the formation of L-tryptophan from L-serine and 1-(indol-3-yl)glycerol 3-phosphate                                                                                                                                                                                                                                                     |
| NGO0275 | 0.0054 | 7.42  | up   | 0.0591 | 4.25  | up   | 0.1912 | 2.56  | up   | IgA-specific metalloendopeptidase\ Context:(NC_002946)-[272294-277075]\ Notes:Best Blastp Hit: prf     130333A protease Ig A [Neisseria gonorrhoeae]                                                                                                                                                                                                                                                                          |
| NGO0276 | 0.2559 | 2.30  | up   | 0.8000 | -1.21 | down | 0.8891 | -1.07 | down | ComA\ Context:(NC_002946)+[277605-279680]\ Notes:Best Blastp Hit: sp P51973 COMA_NEIGO competence protein ComA >gi 481875 pir    S39867 competence protein comA - Neisseria gonorrhoeae >gi 913748 gb AAB32261.1  (S75490) ComA=inner membrane protein [Neisseria gonorrhoeae; MS11; Peptide; 691 aa]                                                                                                                         |

|         |        |      |    |        |       |      |        |       |      |                                                                                                                                                                                                                                                                                                                                                                                                                                     |
|---------|--------|------|----|--------|-------|------|--------|-------|------|-------------------------------------------------------------------------------------------------------------------------------------------------------------------------------------------------------------------------------------------------------------------------------------------------------------------------------------------------------------------------------------------------------------------------------------|
| NGO0277 | 0.5202 | 1.43 | up | 0.6474 | 1.21  | up   | 0.5200 | 1.23  | up   | ComL\ Context:(NC_002946)-[279750-280553]\ Notes:Best Blastp Hit: sp Q50985 COML_NEIGO competence lipoprotein ComL precursor >gi 2120876 pir   S71020 peptidoglycan-linked lipoprotein precursor - Neisseria gonorrhoeae >gi 1107833 emb CAA90076.1  (Z49895) ComL; competence lipoprotein [Neisseria gonorrhoeae] >gi 1588996 prf   2209423A lipoprotein [Neisseria gonorrhoeae] COG0457 TPR-repeat-containing proteins            |
| NGO0278 | 0.1031 | 2.82 | up | 0.4588 | -1.34 | down | 0.3941 | -1.41 | down | RluD\ Context:(NC_002946)+[280552-281676]\ Notes:Best Blastp Hit: pir   A81168 ribosomal large chain pseudouridine synthase D NMB0704 [imported] - Neisseria meningitidis (group B strain MD58) >gi 7225933 gb AAF41121.1  (AE002425) ribosomal large subunit pseudouridine synthase D [Neisseria meningitidis MC58] COG0564 Predicted pseudouridylate synthase family 2; putative ribosomal large subunit pseudouridine synthase D |
| NGO0280 | 0.4844 | 1.61 | up | 0.5500 | -1.65 | down | 0.6745 | -1.43 | down | hypothetical protein\ Context:(NC_002946)-[282855-283175]\ Notes:                                                                                                                                                                                                                                                                                                                                                                   |
| NGO0281 | 0.3195 | 1.57 | up | 0.8178 | -1.12 | down | 0.6998 | -1.16 | down | hypothetical protein\ Context:(NC_002946)+[283231-284010]\ Notes:Best Blastp Hit: pir   F81937 hypothetical protein NMA0911 [imported] - Neisseria meningitidis (group A strain Z2491) >gi 7379622 emb CAB84187.1  (AL162754) hypothetical protein NMA0911 [Neisseria meningitidis] COG1496 Uncharacterized ACR; YfiH family                                                                                                        |
| NGO0282 | 0.3130 | 1.70 | up | 0.5992 | 1.22  | up   | 0.5453 | 1.19  | up   | hypothetical protein\ Context:(NC_002946)+[284062-284541]\ Notes:Best Blastp Hit: emb CAB84188.1  (AL162754) putative lipoprotein [Neisseria meningitidis]                                                                                                                                                                                                                                                                          |
| NGO0283 | 0.3103 | 1.56 | up | 0.6284 | -1.22 | down | 0.8138 | -1.07 | down | DNA polymerase III subunit delta\ Context:(NC_002946)+[284543-285541]\ Notes:required for the assembly and function of the DNAX complex which is required for the assembly of the beta subunit onto primed DNA                                                                                                                                                                                                                      |

|         |        |       |      |        |       |      |        |       |      |                                                                                                                                                                                                                                                                                                                                                                                      |
|---------|--------|-------|------|--------|-------|------|--------|-------|------|--------------------------------------------------------------------------------------------------------------------------------------------------------------------------------------------------------------------------------------------------------------------------------------------------------------------------------------------------------------------------------------|
| NGO0284 | 0.6630 | -1.26 | down | 0.2634 | -1.62 | down | 0.5543 | -1.24 | down | hypothetical protein\ Context:(NC_002946)+[285662-286081]\ Notes:Best Blastp Hit: pir   A81938 probable membrane protein NMA0914 [imported] - Neisseria meningitidis (group A strain Z2491)<br>>gi 7379625 emb CAB84190.1  (AL162754) putative membrane protein [Neisseria meningitidis]<br>>gi 7413439 gb AAF62317.1  (AE002425) hypothetical protein [Neisseria meningitidis MC58] |
| NGO0285 | 0.4256 | -2.01 | down | 0.0061 | -6.53 | down | 0.0014 | -3.65 | down | hypothetical protein\ Context:(NC_002946)+[286106-286672]\ Notes:Best Blastp Hit: gb   AAF62318.1   (AE002425) hypothetical protein [Neisseria meningitidis MC58]                                                                                                                                                                                                                    |
| NGO0286 | 0.0575 | 2.73  | up   | 0.3043 | 1.41  | up   | 0.0833 | 2.04  | up   | hypothetical protein\ Context:(NC_002946)-[286763-287647]\ Notes:Best Blastp Hit: pir   F81168 conserved hypothetical protein NMB0711 [imported] - Neisseria meningitidis (group B strain MD58)<br>>gi 7225938 gb AAF41126.1  (AE002425) conserved hypothetical protein [Neisseria meningitidis MC58]<br>COG1561 Uncharacterized stress-induced protein; YicC                        |
| NGO0288 | 0.9272 | 1.05  | up   | 0.8276 | -1.09 | down | 0.9645 | 1.01  | up   | RNA polymerase factor sigma-32\ Context:(NC_002946)-[288380-289252]\ Notes:binds with the catalytic core of RNA polymerase to produce the holoenzyme; this sigma factor is responsible for the expression of heat shock promoters                                                                                                                                                    |
| NGO0289 | 0.7444 | 1.24  | up   | 0.7974 | -1.21 | down | 0.3838 | -2.17 | down | apolipoprotein N-acyltransferase\ Context:(NC_002946)-[289507-291045]\ Notes:Transfers the fatty acyl group on membrane lipoproteins                                                                                                                                                                                                                                                 |
| NGO0290 | 0.6817 | 1.73  | up   | 0.1399 | -9.24 | down | 0.2958 | -1.67 | down | hypothetical protein\ Context:(NC_002946)-[291115-291855]\ Notes:Best Blastp Hit: gb   AAG05246.1   AE004611_11 (AE004611) conserved hypothetical protein [Pseudomonas aeruginosa]                                                                                                                                                                                                   |
| NGO0291 | 0.8917 | -1.06 | down | 0.1962 | -2.07 | down | 0.7375 | 1.10  | up   | potassium/proton antiporter\<br>Context:(NC_002946)+[292059-293780]\ Notes:the Vibrio parahaemolyticus gene VP2867 was found to be a potassium/proton antiporter; can rapidly extrude potassium against a potassium gradient at alkaline pH when cloned and expressed in Escherichia coli                                                                                            |



|         |        |       |      |        |       |      |        |       |      |                                                                                                                                                                                                                                                                                                                                                                                                                                                                                                                                                                                 |
|---------|--------|-------|------|--------|-------|------|--------|-------|------|---------------------------------------------------------------------------------------------------------------------------------------------------------------------------------------------------------------------------------------------------------------------------------------------------------------------------------------------------------------------------------------------------------------------------------------------------------------------------------------------------------------------------------------------------------------------------------|
| NGO0292 | 0.0640 | -3.32 | down | 0.0708 | -2.76 | down | 0.3683 | -1.42 | down | hypothetical protein\ Context:(NC_002946)-[293777-294244]\ Notes:Best Blastp Hit: possibly phase variable - 8A residue homopolymer repeat in the coding sequence (ON)                                                                                                                                                                                                                                                                                                                                                                                                           |
| NGO0293 | 0.8014 | 1.19  | up   | 0.3169 | 2.33  | up   | 0.4012 | 1.54  | up   | HemZ\ Context:(NC_002946)-[294435-295445]\ Notes:Best Blastp Hit: emb CAB84199.1  (AL162754) putative ferrochelatase [Neisseria meningitidis] COG0276 Protoheme ferro-lyase (ferrochelatase)                                                                                                                                                                                                                                                                                                                                                                                    |
| NGO0294 | 0.2296 | -1.95 | down | 0.9710 | -1.01 | down | 0.8907 | -1.04 | down | queuine tRNA-ribosyltransferase\ Context:(NC_002946)-[295527-296642]\ Notes:Exchanges the guanine residue with 7-aminomethyl-7-deazaguanine in tRNAs with GU(N) anticodons (tRNA-Asp; -Asn; -His and -Tyr)                                                                                                                                                                                                                                                                                                                                                                      |
| NGO0295 | 0.2048 | 2.35  | up   | 0.4913 | 1.31  | up   | 0.5391 | 1.21  | up   | putative threonyl-tRNA synthetase\ Context:(NC_002946)+[296950-298863]\ Notes:Best Blastp Hit: pir   E81167 threonyl-tRNA synthetase NMB0720 [imported] - Neisseria meningitidis (group B strain MD58) >gi 7225946 gb AAF41133.1  (AE002426) threonyl-tRNA synthetase [Neisseria meningitidis MC58] COG0441 Threonyl-tRNA synthetase                                                                                                                                                                                                                                            |
| NGO0296 | 0.0178 | 7.67  | up   | 0.9322 | -1.06 | down | 0.2177 | 1.44  | up   | translation initiation factor IF-3\ Context:(NC_002946)+[298881-299402]\ Notes:IF-3 has several functions that are required and promote translation initiation including; preventing association of 70S by binding to 30S; monitoring codon-anticodon interactions by promoting disassociation of fMet-tRNA(fMet) from initiation complexes formed on leaderless mRNAs or incorrectly bound noninitiator tRNAs and complexes with noncanonical start sites; stimulates codon-anticodon interactions at P-site; involved in moving mRNA to the P-site; and in recycling subunits |

|         |        |       |      |        |       |      |        |       |      |                                                                                                                                                                                                                                                                                                                                                                                                                                                               |
|---------|--------|-------|------|--------|-------|------|--------|-------|------|---------------------------------------------------------------------------------------------------------------------------------------------------------------------------------------------------------------------------------------------------------------------------------------------------------------------------------------------------------------------------------------------------------------------------------------------------------------|
| NGO0297 | 0.0619 | 3.40  | up   | 0.3690 | 1.44  | up   | 0.4601 | 1.36  | up   | 50S ribosomal protein L35\ Context:(NC_002946)+[299549-299746]\ Notes:Best Blastp Hit: pir   E81165 50S ribosomal protein L35 NMB0722 [imported] - Neisseria meningitidis (group B strain MD58; group A strain Z2491)<br>>gi 7225949 gb AAF41135.1  (AE002427) 50S ribosomal protein L35 [Neisseria meningitidis MC58]<br>>gi 7379636 emb CAB84203.1  (AL162754) putative 50S ribosomal protein L35 [Neisseria meningitidis] COG0291<br>Ribosomal protein L35 |
| NGO0298 | 0.0797 | 3.09  | up   | 0.3109 | 1.59  | up   | 0.2145 | 1.51  | up   | 50S ribosomal protein L20\ Context:(NC_002946)+[299759-300118]\ Notes:binds directly to 23S ribosomal RNA prior to in vitro assembly of the 50S ribosomal subunit                                                                                                                                                                                                                                                                                             |
| NGO0299 | 0.3583 | 1.87  | up   | 0.9523 | -1.02 | down | 0.3998 | -1.58 | down | phenylalanyl-tRNA synthetase subunit alpha\ Context:(NC_002946)+[300359-301348]\ Notes:catalyzes a two-step reaction; first charging a phenylalanine molecule by linking its carboxyl group to the alpha-phosphate of ATP; followed by transfer of the aminoacyl-adenylate to its tRNA; forms a heterotetramer of alpha(2)beta(2); binds two magnesium ions per tetramer; type 1 subfamily                                                                    |
| NGO0300 | 0.5959 | -1.26 | down | 0.9665 | 1.02  | up   | 0.6009 | -1.17 | down | putative very-short-patch-repair endonuclease\ Context:(NC_002946)+[301365-301778]\ Notes:Best Blastp Hit: emb CAB59896.1  (AJ238948) putative very short patch repair endonuclease [Neisseria meningitidis]                                                                                                                                                                                                                                                  |
| NGO0302 | 0.2693 | 1.78  | up   | 0.5749 | 1.30  | up   | 0.4381 | 1.28  | up   | hypothetical protein\ Context:(NC_002946)+[302132-302377]\ Notes:                                                                                                                                                                                                                                                                                                                                                                                             |
| NGO0303 | 0.2676 | 2.03  | up   | 0.5715 | 1.22  | up   | 0.9969 | -1.00 | down | hypothetical protein\ Context:(NC_002946)+[302383-303132]\ Notes:Best Blastp Hit: gb AAD19409.1  (AF102543) unknown [Zymomonas mobilis]                                                                                                                                                                                                                                                                                                                       |
| NGO0304 | 0.9513 | 1.03  | up   | 0.1792 | -2.01 | down | 0.5967 | -1.24 | down | phenylalanyl-tRNA synthetase subunit beta\ Context:(NC_002946)+[303223-305586]\ Notes:catalyzes a two-step reaction; first charging a phenylalanine molecule by linking its carboxyl group to the alpha-phosphate of ATP; followed by transfer of the aminoacyl-adenylate to its tRNA; forms a tetramer of alpha(2)beta(2); binds two magnesium ions per tetramer; type 2 subfamily                                                                           |

|         |        |       |      |        |        |      |        |       |      |                                                                                                                                                                                                                                                                                                                                                                                                                                                                                                                               |
|---------|--------|-------|------|--------|--------|------|--------|-------|------|-------------------------------------------------------------------------------------------------------------------------------------------------------------------------------------------------------------------------------------------------------------------------------------------------------------------------------------------------------------------------------------------------------------------------------------------------------------------------------------------------------------------------------|
| NGO0305 | 0.1816 | 2.26  | up   | 0.1809 | 1.66   | up   | 0.1410 | 1.84  | up   | IfhA\ Context:(NC_002946)+[305660-305962]\ Notes:Best Blastp Hit: pir     D81166 integration host factor; alpha chain NMB0729 [imported] - Neisseria meningitidis (group B strain MD58; group A strain Z2491)<br>>gi 7225956 gb AAF41142.1  (AE002427) integration host factor; alpha subunit [Neisseria meningitidis MC58]<br>>gi 7379642 emb CAB84209.1  (AL162754) putative integration host factor alpha-subunit [Neisseria meningitidis] COG0776 Histone-like DNA-binding protein; integration host factor alpha subunit |
| NGO0306 | 0.3764 | 1.57  | up   | 0.4138 | 1.38   | up   | 0.5153 | 1.22  | up   | hypothetical protein\ Context:(NC_002946)+[305946-306254]\ Notes:Best Blastp Hit: emb CAB84210.1  (AL162754) hypothetical protein NMA0939 [Neisseria meningitidis]                                                                                                                                                                                                                                                                                                                                                            |
| NGO0307 | 0.8507 | -1.09 | down | 0.0847 | -2.93  | down | 0.6908 | 1.31  | up   | FxsA\ Context:(NC_002946)+[306430-306915]\ Notes:F exclusion of bacteriophage T7; overproduction of this protein in Escherichia coli inhibits the F plasmid-mediated exclusion of bacteriophage T7; interacts with the F plasmid-encoded PifA protein; inner membrane protein                                                                                                                                                                                                                                                 |
| NGO0308 | 0.0078 | -7.26 | down | 0.0025 | -20.60 | down | 0.1902 | -2.56 | down | putative adenosylmethionine-8-amino-7-oxononanoate aminotranferase\ Context:(NC_002946)+[307549-308850]\ Notes:Best Blastp Hit: pir     D81164 adenosylmethionine-8-amino-7-oxononanoate aminotransferase NMB0732 [imported] - Neisseria meningitidis (group B strain MD58)<br>>gi 7225960 gb AAF41145.1  (AE002428)<br>adenosylmethionine-8-amino-7-oxononanoate aminotransferase [Neisseria meningitidis MC58] COG0161<br>Adenosylmethionine-8-amino-7-oxononanoate                                                         |
| NGO0309 | 0.2318 | -1.92 | down | 0.0039 | -11.97 | down | 0.1568 | -2.17 | down | dithiobiotin synthetase\ Context:(NC_002946)+[308847-309494]\ Notes:DTB synthetase; dethiobiotin synthase; involved in production of dethiobiotin from ATP and 7;8-diaminononanoate and carbon dioxide; contains magnesium                                                                                                                                                                                                                                                                                                    |

|         |        |       |      |        |       |      |        |       |      |                                                                                                                                                                                                                                                                                                                                                                          |
|---------|--------|-------|------|--------|-------|------|--------|-------|------|--------------------------------------------------------------------------------------------------------------------------------------------------------------------------------------------------------------------------------------------------------------------------------------------------------------------------------------------------------------------------|
| NGO0310 | 0.5932 | 1.36  | up   | 0.4133 | -2.30 | down | 0.2101 | -2.37 | down | hypothetical protein\ Context:(NC_002946)+[309428-309985]\ Notes:Best Blastp Hit: pir    H81940 hypothetical protein NMA0944 [imported] - Neisseria meningitidis (group A strain Z2491) >gi 7379648 emb CAB84215.1  (AL162754) hypothetical protein NMA0944 [Neisseria meningitidis]                                                                                     |
| NGO0311 | 0.5344 | -1.59 | down | 0.8169 | -1.20 | down | 0.6206 | -1.86 | down | hypothetical protein\ Context:(NC_002946)+[310109-310516]\ Notes:                                                                                                                                                                                                                                                                                                        |
| NGO0312 | 0.4534 | -1.40 | down | 0.2957 | -1.83 | down | 0.8307 | 1.07  | up   | 4-hydroxybenzoate octaprenyltransferase\ Context:(NC_002946)+[310506-311396]\ Notes:catalyzes the conversion of 4-Hydroxybenzoate into 3-octaprenyl-4-hydroxybenzoate; as part of the ubiquinone biosynthesis pathway                                                                                                                                                    |
| NGO0313 | 0.5806 | 1.34  | up   | 0.7948 | 1.11  | up   | 0.8872 | 1.05  | up   | putative two-component system transcriptional response regulator\ Context:(NC_002946)+[311581-312030]\ Notes:Best Blastp Hit: pir    B81941 probable regulatory protein NMA0946 [imported] - Neisseria meningitidis (group A strain Z2491) >gi 7379650 emb CAB84217.1  (AL162754) putative regulatory protein [Neisseria meningitidis] COG1762 Phosphotransferase system |
| NGO0314 | 0.5626 | 1.30  | up   | 0.7059 | 1.16  | up   | 0.9118 | 1.03  | up   | HPr kinase/phosphorylase\ Context:(NC_002946)+[312034-312996]\ Notes:catalyzes the phosphorylation of the phosphocarrier protein HPr of the bacterial phosphotransferase system                                                                                                                                                                                          |
| NGO0315 | 0.3608 | 1.52  | up   | 0.9443 | -1.03 | down | 0.7168 | 1.10  | up   | hypothetical protein\ Context:(NC_002946)+[312977-313831]\ Notes:Best Blastp Hit: pir    D81941 hypothetical protein NMA0948 [imported] - Neisseria meningitidis (group A strain Z2491) >gi 7379652 emb CAB84219.1  (AL162754) hypothetical protein NMA0948 [Neisseria meningitidis] COG1660 Uncharacterized BCR; Yhbj/UPF0042 family                                    |
| NGO0316 | 0.8406 | 1.10  | up   | 0.4519 | 1.51  | up   | 0.5940 | -1.35 | down | ribosomal biogenesis GTPase\ Context:(NC_002946)+[313912-314853]\ Notes:essential GTPase; functions in ribosome assembly; binds a unique part of the 23S rRNA; interacts with ribosomal protein L25(Ctc)                                                                                                                                                                 |

|         |        |        |      |        |       |      |        |       |      |                                                                                                                                                                                                                                                                                                                               |
|---------|--------|--------|------|--------|-------|------|--------|-------|------|-------------------------------------------------------------------------------------------------------------------------------------------------------------------------------------------------------------------------------------------------------------------------------------------------------------------------------|
| NGO0317 | 0.6132 | 1.46   | up   | 0.1278 | 3.08  | up   | 0.8709 | 1.09  | up   | hypothetical protein\ Context:(NC_002946)+[314954-315556]\ Notes:Best Blastp Hit: pir     F81941 hypothetical protein NMA0951 [imported] - Neisseria meningitidis (group A strain Z2491) >gi 7379654 emb CAB84221.1  (AL162754) hypothetical protein NMA0951 [Neisseria meningitidis] COG1386 Uncharacterized ACR             |
| NGO0318 | 0.5538 | 1.42   | up   | 0.0194 | -2.59 | down | 0.4106 | -1.27 | down | hypothetical protein\ Context:(NC_002946)+[315740-317413]\ Notes:Best Blastp Hit: pir     D81165 DNA repair protein RecN NMB0740 [imported] - Neisseria meningitidis (group B strain MD58) >gi 7225968 gb AAF41153.1  (AE002428) DNA repair protein RecN [Neisseria meningitidis MC58] COG0497 ATPases involved in DNA repair |
| NGO0319 | 0.0029 | -9.59  | down | 0.1448 | -5.76 | down | 0.8788 | -1.13 | down | hypothetical protein\ Context:(NC_002946)-[318158-319777]\ Notes:Best Blastp Hit: emb CAB84224.1  (AL162754) hypothetical protein NMA0954 [Neisseria meningitidis] COG0500 SAM-dependent methyltransferases                                                                                                                   |
| NGO0320 | 0.8869 | -1.07  | down | 0.9648 | -1.02 | down | 0.9562 | -1.02 | down | hypothetical protein\ Context:(NC_002946)+[319873-320265]\ Notes:Best Blastp Hit: pir     B81942 hypothetical protein NMA0955 [imported] - Neisseria meningitidis (group A strain Z2491) >gi 7379658 emb CAB84225.1  (AL162754) hypothetical protein NMA0955 [Neisseria meningitidis]                                         |
| NGO0321 | 0.6154 | 1.27   | up   | 0.9824 | 1.01  | up   | 0.7221 | -1.10 | down | ubiquinone/menaquinone biosynthesis methyltransferase\ Context:(NC_002946)+[320308-321045]\ Notes:Catalyzes the carbon methylation reaction in the biosynthesis of ubiquinone                                                                                                                                                 |
| NGO0322 | 0.0107 | 6.81   | up   | 0.0199 | 4.67  | up   | 0.0095 | 4.03  | up   | hypothetical protein\ Context:(NC_002946)+[321265-321744]\ Notes:Best Blastp Hit: pir     G81162 hypothetical protein NMB0744 [imported] - Neisseria meningitidis (group B strain MD58) >gi 7225973 gb AAF41157.1  (AE002429) hypothetical protein [Neisseria meningitidis MC58]                                              |
| NGO0323 | 0.0006 | -10.21 | down | 0.0125 | -6.67 | down | 0.0299 | -5.32 | down | 2-amino-4-hydroxy-6-hydroxymethylidihydropteridine-pyrophosphokinase\ Context:(NC_002946)-[321872-322366]\ Notes:Best Blastp Hit: H COG08017; 8-dihydro-6-hydroxymethylpterin-pyrophosphokinase                                                                                                                               |

|         |        |       |      |        |       |      |        |       |      |                                                                                                                                                                                                                                                                                                                                                                                                                                     |
|---------|--------|-------|------|--------|-------|------|--------|-------|------|-------------------------------------------------------------------------------------------------------------------------------------------------------------------------------------------------------------------------------------------------------------------------------------------------------------------------------------------------------------------------------------------------------------------------------------|
| NGO0324 | 0.0249 | -4.58 | down | 0.0050 | -6.08 | down | 0.0765 | -3.47 | down | hypothetical protein\ Context:(NC_002946)-[322376-322750]\ Notes:Best Blastp Hit: pir    A81163 conserved hypothetical protein NMB0746 [imported] - Neisseria meningitidis (group B strain MD58)<br>>gi 7225975 gb AAF41159.1  (AE002429) conserved hypothetical protein [Neisseria meningitidis MC58]                                                                                                                              |
| NGO0326 | 0.4716 | 1.57  | up   | 0.8977 | 1.05  | up   | 0.8616 | 1.06  | up   | hypothetical protein\ Context:(NC_002946)-[323455-323748]\ Notes:Best Blastp Hit: pir    C81163 host factor-I NMB0748 [imported] - Neisseria meningitidis (group B strain MD58; group A strain Z2491)<br>>gi 7225977 gb AAF41161.1  (AE002429) host factor-I [Neisseria meningitidis MC58]<br>>gi 7379664 emb CAB84231.1  (AL162754) putative regulator [Neisseria meningitidis] COG1923 Uncharacterized ACR; host factor I protein |
| NGO0327 | 0.3706 | 1.54  | up   | 0.8963 | 1.05  | up   | 0.3437 | 1.33  | up   | putative D-alanyl-D-alanine-endopeptidase\ Context:(NC_002946)-[323877-324815]\ Notes:Best Blastp Hit: gb AAD38860.1 AF156692_1 (AF156692) penicillin-binding protein 4 [Neisseria gonorrhoeae] COG1686 D-alanyl-D-alanine carboxypeptidase                                                                                                                                                                                         |
| NGO0328 | 0.7993 | 1.14  | up   | 0.8617 | -1.07 | down | 0.8526 | -1.05 | down | hypothetical protein\ Context:(NC_002946)+[325073-325576]\ Notes:Best Blastp Hit: pir    B81943 hypothetical protein NMA0963 [imported] - Neisseria meningitidis (group A strain Z2491) >gi 7379666 emb CAB84233.1  (AL162754) hypothetical protein NMA0963 [Neisseria meningitidis] COG12 25 Peroxiredoxins                                                                                                                        |
| NGO0329 | 0.4717 | -1.84 | down | 0.6825 | -1.19 | down | 0.0457 | -2.92 | down | hypothetical protein\ Context:(NC_002946)+[325628-326503]\ Notes:Best Blastp Hit: pir    F81163 integrase/recombinase XerD NMB0751 [imported] - Neisseria meningitidis (group B strain MD58)<br>>gi 7225980 gb AAF41164.1  (AE002429) integrase/recombinase XerD [Neisseria meningitidis MC58] COG0582 Integrase                                                                                                                    |
| NGO0330 | 0.2644 | -2.15 | down | 0.0920 | -7.00 | down | 0.0428 | 6.38  | up   | hypothetical protein\ Context:(NC_002946)-[326609-326962]\ Notes:Best Blastp Hit: >pir    B81163 conserved hypothetical protein NMB0747 [imported] - Neisseria meningitidis (group B strain MD58) gb AAF41160.1  (AE002429) conserved hypothetical protein [Neisseria meningitidis MC58]                                                                                                                                            |

|         |        |       |      |        |       |      |        |       |      |                                                                                                                                                                                                                                                                                                                                                                                                    |
|---------|--------|-------|------|--------|-------|------|--------|-------|------|----------------------------------------------------------------------------------------------------------------------------------------------------------------------------------------------------------------------------------------------------------------------------------------------------------------------------------------------------------------------------------------------------|
| NGO0331 | 0.0870 | 5.18  | up   | 0.1395 | 4.39  | up   | 0.7629 | -1.15 | down | hypothetical protein\ Context:(NC_002946)+[327041-327274]\ Notes:Best Blastp Hit: >pir     B81163 conserved hypothetical protein NMB0747 [imported] - Neisseria meningitidis (group B strain MD58) gb AAF41160.1  (AE002429) conserved hypothetical protein [Neisseria meningitidis MC58]                                                                                                          |
| NGO0332 | 0.0336 | -3.43 | down | 0.1470 | -2.17 | down | 0.2141 | -2.04 | down | putative reductase\ Context:(NC_002946)-[327646-328509]\ Notes:Best Blastp Hit: pir     F81943 probable dTDP-4-dehydrorhamnose reductase (EC 1.1.1.133) NMA0967 [imported] - Neisseria meningitidis (group A strain Z2491) >gi 7379670 emb CAB84237.1  (AL162754) putative dTDP-4-dehydrorhamnose reductase [Neisseria meningitidis] COG1091 dTDP-4-dehydrorhamnose reductase                      |
| NGO0333 | 0.5644 | -1.39 | down | 0.0381 | -3.38 | down | 0.1434 | -2.10 | down | phosphoribosylaminoimidazole-succinocarboxamidesynthase\ Context:(NC_002946)+[328606-329565]\ Notes:catalyzes the formation of (S)-2-(5-amino-1-(5-phospho-D-ribose))imidazole-4- carboxamido)succinate from 5-amino-1-(5-phospho-D-ribose)imidazole-4-carboxylate and L-aspartate in purine biosynthesis; SAICAR synthase                                                                         |
| NGO0335 | 0.3138 | 1.64  | up   | 0.1573 | 1.63  | up   | 0.0967 | 2.42  | up   | polynucleotide phosphorylase/polyadenylase\ Context:(NC_002946)+[329799-331922]\ Notes:Best Blastp Hit: pir     C81161 polyribonucleotide nucleotidyltransferase NMB0758 [imported] - Neisseria meningitidis (group B strain MD58) >gi 7225988 gb AAF41171.1  (AE002430) polyribonucleotide nucleotidyltransferase [Neisseria meningitidis MC58] COG1185 Polyribonucleotide nucleotidyltransferase |
| NGO0336 | 0.6955 | 1.22  | up   | 0.0252 | -2.92 | down | 0.2606 | -2.42 | down | hypothetical protein\ Context:(NC_002946)-[331995-332663]\ Notes:Best Blastp Hit: pir     D81161 conserved hypothetical protein NMB0759 [imported] - Neisseria meningitidis (group B strain MD58) >gi 7225989 gb AAF41172.1  (AE002430) conserved hypothetical protein [Neisseria meningitidis MC58]                                                                                               |
| NGO0337 | 0.2805 | -2.34 | down | 0.5353 | -2.70 | down | 0.2491 | -2.75 | down | hypothetical protein\ Context:(NC_002946)-[332660-332974]\ Notes:Best Blastp Hit: emb CAB84241.1  (AL162754) putative lipoprotein [Neisseria meningitidis]                                                                                                                                                                                                                                         |

|         |        |       |      |        |       |      |        |       |      |                                                                                                                                                                                                                                                                                                                                                                                                                                     |
|---------|--------|-------|------|--------|-------|------|--------|-------|------|-------------------------------------------------------------------------------------------------------------------------------------------------------------------------------------------------------------------------------------------------------------------------------------------------------------------------------------------------------------------------------------------------------------------------------------|
| NGO0338 | 0.6087 | 1.37  | up   | 0.5274 | 1.35  | up   | 0.5471 | -1.19 | down | diaminopimelate epimerase\<br>Context:(NC_002946)+[333111-333962]\ Notes:involved in lysine biosynthesis; DAP epimerase; produces DL-diaminopimelate from LL-diaminopimelate                                                                                                                                                                                                                                                        |
| NGO0339 | 0.0173 | -3.48 | down | 0.0341 | -2.48 | down | 0.0818 | -3.50 | down | hypothetical protein\<br>Context:(NC_002946)+[333959-334564]\ Notes:Best Blastp Hit: possibly phase variable - 8T residue homopolymer repeat in the coding sequence (ON)                                                                                                                                                                                                                                                            |
| NGO0340 | 0.2185 | 1.96  | up   | 0.3520 | 1.54  | up   | 0.4293 | 1.33  | up   | putative cysteine synthase/cystathionine beta-synthase\<br>Context:(NC_002946)+[334760-335692]\ Notes:Best Blastp Hit: confirmed inframe stop                                                                                                                                                                                                                                                                                       |
| NGO0342 | 0.5350 | 1.99  | up   | 0.1538 | -2.93 | down | 0.0424 | -2.40 | down | hypothetical protein\<br>Context:(NC_002946)+[337103-337339]\ Notes:Best Blastp Hit: pir   T30271 surface protein - fluke (Schistosoma mansoni) (fragment) >gi 501209 gb AAA73556.1  (M99494) surface protein [Schistosoma mansoni]                                                                                                                                                                                                 |
| NGO0343 | 0.5677 | 1.31  | up   | 0.9225 | -1.06 | down | 0.9534 | 1.03  | up   | Lep\<br>Context:(NC_002946)-[337539-338558]\ Notes:Best Blastp Hit: gb AAF41178.1  (AE002430) signal peptidase I [Neisseria meningitidis MC58] COG0681 Signal peptidase I; putative signal peptidase I                                                                                                                                                                                                                              |
| NGO0344 | 0.1143 | 2.54  | up   | 0.0532 | 2.32  | up   | 0.1670 | 1.52  | up   | GTP-binding protein LepA\<br>Context:(NC_002946)-[338704-340497]\ Notes:binds to the ribosome on the universally-conserved alpha-sarcin loop                                                                                                                                                                                                                                                                                        |
| NGO0345 | 0.0907 | 2.22  | up   | 0.4228 | 1.31  | up   | 0.5882 | 1.16  | up   | putative nucleoside phosphorylase\<br>Context:(NC_002946)-[340639-341340]\ Notes:Best Blastp Hit: pir   D81159 5-methylthioadenosine nucleosidase/S-adenosylhomocysteine nucleosidase NMB0767 [imported] - Neisseria meningitidis (group B strain MD58) >gi 7225998 gb AAF41180.1  (AE002431) 5-methylthioadenosine nucleosidase/S-adenosylhomocysteine nucleosidase [Neisseria meningitidis MC58] COG0775 Nucleoside phosphorylase |
| NGO0346 | 0.5815 | 1.34  | up   | 0.6650 | 1.18  | up   | 0.9772 | 1.01  | up   | putative twitching motility-like protein\<br>Context:(NC_002946)+[341526-342638]\ Notes:Best Blastp Hit: pir   B81945 probable pilus retraction protein NMA0979 [imported] - Neisseria meningitidis (group A strain Z2491) >gi 7379682 emb CAB84249.1  (AL162754) putative pilus retraction protein [Neisseria meningitidis] COG0630 Predicted ATPases involved in pili                                                             |



|         |        |      |    |        |       |      |        |       |      |                                                                                                                                                                                                                                                                                                                                                                                                                                                                           |
|---------|--------|------|----|--------|-------|------|--------|-------|------|---------------------------------------------------------------------------------------------------------------------------------------------------------------------------------------------------------------------------------------------------------------------------------------------------------------------------------------------------------------------------------------------------------------------------------------------------------------------------|
| NGO0347 | 0.3205 | 1.65 | up | 0.1305 | 1.75  | up   | 0.7701 | 1.09  | up   | DNA polymerase III subunit delta\<br>Context:(NC_002946)+[342672-343649]\ Notes:catalyzes the DNA-template-directed extension of the 3'-end of a DNA strand; the delta' subunit seems to interact with the gamma subunit to transfer the beta subunit on the DNA                                                                                                                                                                                                          |
| NGO0348 | 0.1748 | 1.95 | up | 0.0610 | 2.36  | up   | 0.4586 | 1.31  | up   | putative type 4 pilus biogenesis protein\<br>Context:(NC_002946)+[343653-344003]\ Notes:Best Blastp Hit: pir    D81945 probable pilus biogenesis protein NMA0981 [imported] - Neisseria meningitidis (group A strain Z2491) >gi 7379684 emb CAB84251.1  (AL162754) putative pilus biogenesis protein [Neisseria meningitidis]                                                                                                                                             |
| NGO0349 | 0.2339 | 1.83 | up | 0.3722 | 1.40  | up   | 0.5814 | 1.19  | up   | hypothetical protein\<br>Context:(NC_002946)+[344008-344787]\ Notes:Best Blastp Hit: pir    E81945 hypothetical protein NMA0982 [imported] - Neisseria meningitidis (group A strain Z2491) >gi 7379685 emb CAB84252.1  (AL162754) hypothetical protein NMA0982 [Neisseria meningitidis] COG0084 Predicted hydrolases of PHP superfamily                                                                                                                                   |
| NGO0350 | 0.5168 | 1.34 | up | 0.2339 | 1.47  | up   | 0.6893 | -1.12 | down | hypothetical protein\<br>Context:(NC_002946)+[344813-345028]\ Notes:Best Blastp Hit: gb  AAF41185.1  (AE002431) conserved hypothetical protein [Neisseria meningitidis MC58]                                                                                                                                                                                                                                                                                              |
| NGO0351 | 0.2069 | 1.81 | up | 0.4997 | -1.54 | down | 0.6437 | 1.15  | up   | glutaredoxin-like protein GriA\<br>Context:(NC_002946)+[345129-345440]\ Notes:Best Blastp Hit: pir    B81160 conserved hypothetical protein NMB0773 [imported] - Neisseria meningitidis (group B strain MD58; group A strain Z2491) >gi 7226004 gb AAF41186.1  (AE002431) conserved hypothetical protein [Neisseria meningitidis MC58] >gi 7379687 emb CAB84254.1  (AL162754) hypothetical protein NMA0984 [Neisseria meningitidis] COG0278 Glutaredoxin-related proteins |
| NGO0352 | 0.2755 | 1.75 | up | 0.9201 | -1.04 | down | 0.7956 | 1.07  | up   | hypothetical protein\<br>Context:(NC_002946)+[345440-345556]\ Notes:Best Blastp Hit: possibly phase variable - 8A residue homopolymer repeat in the coding sequence (ON)                                                                                                                                                                                                                                                                                                  |

|         |        |       |      |        |       |      |        |       |      |                                                                                                                                                                                                                                                                                                                                                                                                                                          |
|---------|--------|-------|------|--------|-------|------|--------|-------|------|------------------------------------------------------------------------------------------------------------------------------------------------------------------------------------------------------------------------------------------------------------------------------------------------------------------------------------------------------------------------------------------------------------------------------------------|
| NGO0353 | 0.3870 | 1.59  | up   | 0.9293 | -1.04 | down | 0.9351 | -1.03 | down | uracil phosphoribosyltransferase\<br>Context:(NC_002946)+[345546-346172]\ Notes:Catalyzes the formation of uracil and 5-phospho-alpha-D-ribose 1-diphosphate from UMP and diphosphate                                                                                                                                                                                                                                                    |
| NGO0354 | 0.2317 | 1.85  | up   | 0.7644 | 1.10  | up   | 0.6601 | -1.12 | down | hypothetical protein\<br>Context:(NC_002946)+[346195-346515]\ Notes:Best Blastp Hit: pir    D81160 hypothetical protein NMB0775 [imported] - Neisseria meningitidis (group B strain MD58) >gi 7226006 gb AAF41188.1  (AE002431) hypothetical protein [Neisseria meningitidis MC58]                                                                                                                                                       |
| NGO0356 | 0.0318 | -3.02 | down | 0.5772 | -1.21 | down | 0.1656 | -2.13 | down | hypothetical protein\<br>Context:(NC_002946)+[347355-348179]\ Notes:Best Blastp Hit: sp Q07605 T4BA_BACCO restriction enzyme BGCI alpha subunit [includes: adenine-specific methyltransferase activity ] >gi 1075788 pir   A53125 restriction enzyme Bcgl alpha chain - Bacillus coagulans >gi 304140 gb AAA16626.1  (L17341) restriction endonuclease alpha subunit [Bacillus coagulans] COG0286 Type I restriction-modification system |
| NGO0357 | 0.6344 | -1.23 | down | 0.4156 | 1.31  | up   | 0.1378 | -1.71 | down | hypothetical protein\<br>Context:(NC_002946)+[348179-349147]\ Notes:Best Blastp Hit: sp Q07606 T4BB_BACCO restriction enzyme BGCI beta subunit >gi 1075789 pir   B53125 restriction enzyme Bcgl beta chain - Bacillus coagulans >gi 304141 gb AAA16627.1  (L17341) restriction endonuclease beta subunit [Bacillus coagulans]                                                                                                            |
| NGO0358 | 0.1850 | 1.82  | up   | 0.4615 | 1.30  | up   | 0.2590 | 1.41  | up   | hypothetical protein\<br>Context:(NC_002946)+[349426-349851]\ Notes:Best Blastp Hit: gb AAD13642.1  (AF003941) Gly1ORF1 [Neisseria gonorrhoeae]                                                                                                                                                                                                                                                                                          |
| NGO0359 | 0.9610 | -1.03 | down | 0.7416 | 1.18  | up   | 0.4451 | -1.32 | down | uroporphyrinogen-III synthase\<br>Context:(NC_002946)+[349869-350633]\ Notes:catalyzes the formation of uroporphyrinogen-III from hydroxymethylbilane; functions in tetrapyrrole and heme biosynthesis                                                                                                                                                                                                                                   |

|         |        |       |      |        |       |      |        |      |    |                                                                                                                                                                                                                                                                                                                                                                                                                                                              |
|---------|--------|-------|------|--------|-------|------|--------|------|----|--------------------------------------------------------------------------------------------------------------------------------------------------------------------------------------------------------------------------------------------------------------------------------------------------------------------------------------------------------------------------------------------------------------------------------------------------------------|
| NGO0360 | 0.7519 | 1.16  | up   | 0.0741 | 2.30  | up   | 0.7434 | 1.16 | up | hypothetical protein\ Context:(NC_002946)+[350705-351979]\ Notes:Best Blastp Hit: pir    G81160 uroporphyrin-III C-methyltransferase HemX; probable NMB0778 [imported] - Neisseria meningitidis (group B strain MD58) >gi 7226009 gb AAF41191.1  (AE002431) uroporphyrin-III C-methyltransferase HemX; putative [Neisseria meningitidis MC58]                                                                                                                |
| NGO0361 | 0.0436 | 2.81  | up   | 0.0668 | 4.51  | up   | 0.1498 | 1.77 | up | hypothetical protein\ Context:(NC_002946)+[351976-353193]\ Notes:Best Blastp Hit: pir    E81946 hypothetical protein NMA0990 [imported] - Neisseria meningitidis (group A strain Z2491) >gi 7379693 emb CAB84260.1  (AL162754) hypothetical protein NMA0990 [Neisseria meningitidis]                                                                                                                                                                         |
| NGO0362 | 0.0234 | 3.59  | up   | 0.0742 | 2.66  | up   | 0.4896 | 1.53 | up | putative uroporphyrinogen decarboxylase\ Context:(NC_002946)+[353268-354332]\ Notes:Best Blastp Hit: pir    F81946 probable uroporphyrinogen decarboxylase (EC 4.1.1.37) NMA0991 [imported] - Neisseria meningitidis (group A strain Z2491) >gi 7379694 emb CAB84261.1  (AL162754) putative uroporphyrinogen decarboxylase [Neisseria meningitidis] COG0407 Uroporphyrinogen-III decarboxylase                                                               |
| NGO0363 | 0.0271 | -6.89 | down | 0.3727 | -2.87 | down | 0.4533 | 1.63 | up | putative stress-sensitive restriction system protein\ Context:(NC_002946)-[354395-356284]\ Notes:Best Blastp Hit: pir    B55225 stress-sensitive restriction system protein 2 - Corynebacterium glutamicum (ATCC 13032) >gi 549844 gb AAC00044.1  (U13922) This orf may encode a typeI or typeIII restriction endonuclease which is stress-sensitive and ATP-dependent. It contains a typical ATP binding region (Walker motif) [Corynebacterium glutamicum] |
| NGO0364 | 0.1664 | -4.90 | down | 0.0562 | -7.41 | down | 0.7878 | 1.20 | up | restriction endonuclease R.NgoVII\ Context:(NC_002946)-[356285-357322]\ Notes:Best Blastp Hit: pir    T10166 restriction endonuclease (EC 3.1.21.-) NgoVII - Neisseria gonorrhoeae >gi 1165246 gb AAA86271.1  (U43736) R.NgoVII [Neisseria gonorrhoeae]                                                                                                                                                                                                      |

|         |        |       |      |        |        |      |        |       |      |                                                                                                                                                                                                                                                                                                                                                                                        |
|---------|--------|-------|------|--------|--------|------|--------|-------|------|----------------------------------------------------------------------------------------------------------------------------------------------------------------------------------------------------------------------------------------------------------------------------------------------------------------------------------------------------------------------------------------|
| NGO0365 | 0.3342 | -4.48 | down | 0.0130 | -62.89 | down | 0.9117 | -1.08 | down | site-specific DNA-methyltransferase M.NgoVII\<br>Context:(NC_002946)-[357319-358443]\ Notes:Best Blastp Hit: pir     T10165 site-specific DNA-methyltransferase (cytosine-specific) (EC 2.1.1.73) NgoVII - Neisseria gonorrhoeae >gi 1165245 gb AAA86270.1  (U43736) M.NgoVII [Neisseria gonorrhoeae] COG0270 Site-specific DNA methylase dcm                                          |
| NGO0366 | 0.1637 | -2.73 | down | 0.0570 | -4.26  | down | 0.3780 | 1.97  | up   | hypothetical protein\<br>Context:(NC_002946)+[358468-358725]\ Notes:Best Blastp Hit: possibly phase variable - 22 tandem repeats of AACGC in the coding sequence (ON)                                                                                                                                                                                                                  |
| NGO0367 | 0.5670 | -1.28 | down | 0.2234 | -2.03  | down | 0.0590 | -2.46 | down | DNA repair protein RadA\<br>Context:(NC_002946)+[358830-360209]\ Notes:Sms; stabilizes the strand-invasion intermediate during the DNA repair; involved in recombination of donor DNA and plays an important role in DNA damage repair after exposure to mutagenic agents                                                                                                              |
| NGO0368 | 0.3940 | -1.98 | down | 0.5235 | 1.92   | up   | 0.3161 | 2.42  | up   | hypothetical protein\<br>Context:(NC_002946)-[360484-360864]\ Notes:Best Blastp Hit: pir     D81158 conserved hypothetical protein NMB0783 [imported] - Neisseria meningitidis (group B strain MD58) >gi 7226015 gb AAF41196.1  (AE002432) conserved hypothetical protein [Neisseria meningitidis MC58]                                                                                |
| NGO0369 | 0.4963 | 1.67  | up   | 0.1854 | 1.55   | up   | 0.2413 | 2.08  | up   | hypothetical protein\<br>Context:(NC_002946)-[361088-361531]\ Notes:Best Blastp Hit: emb CAB84264.1  (AL162754) putative periplasmic protein [Neisseria meningitidis] COG0607 Rhodanese-related sulfurtransferases                                                                                                                                                                     |
| NGO0370 | 0.1909 | -3.10 | down | 0.2255 | -3.07  | down | 0.8161 | -1.15 | down | putative exodeoxyribonuclease\<br>Context:(NC_002946)-[361486-365088]\ Notes:Best Blastp Hit: pir     F81158 exodeoxyribonuclease V 135 KD polypeptide NMB0785 [imported] - Neisseria meningitidis (group B strain MD58) >gi 7226017 gb AAF41198.1  (AE002432) exodeoxyribonuclease V 135 KD polypeptide [Neisseria meningitidis MC58] COG1074 ATP-dependent exo DNase (exonuclease V) |

|         |        |       |      |        |       |      |        |       |      |                                                                                                                                                                                                                                                                                                                                                                                                                                                                          |
|---------|--------|-------|------|--------|-------|------|--------|-------|------|--------------------------------------------------------------------------------------------------------------------------------------------------------------------------------------------------------------------------------------------------------------------------------------------------------------------------------------------------------------------------------------------------------------------------------------------------------------------------|
| NGO0371 | 0.0199 | -4.94 | down | 0.0871 | -2.43 | down | 0.1433 | -2.05 | down | hypothetical protein\ Context:(NC_002946)-[365165-366073]\ Notes:Best Blastp Hit: pir    G81158 conserved hypothetical protein NMB0786 [imported] - Neisseria meningitidis (group B strain MD58)<br>>gi 7226018 gb AAF41199.1  (AE002432) conserved hypothetical protein [Neisseria meningitidis MC58]                                                                                                                                                                   |
| NGO0372 | 0.2896 | 1.79  | up   | 0.4911 | 1.35  | up   | 0.4910 | 1.24  | up   | putative ABC transporter; periplasmic binding protein; amino acid\ Context:(NC_002946)+[366358-367185]\ Notes:Best Blastp Hit: pir    H81158 amino acid ABC transporter; periplasmic amino acid-binding protein NMB0787 [imported] - Neisseria meningitidis (group B strain MD58) >gi 7226019 gb AAF41200.1  (AE002432) amino acid ABC transporter; periplasmic amino acid-binding protein [Neisseria meningitidis MC58] COG0834 Periplasmic amino acid binding proteins |
| NGO0373 | 0.5785 | 1.57  | up   | 0.0747 | 2.93  | up   | 0.3382 | -1.64 | down | putative ABC transporter; permease protein; amino acid\ Context:(NC_002946)+[367175-367891]\ Notes:Best Blastp Hit: pir    E81947 probable amino acid permease integral membrane protein NMA0999 [imported] - Neisseria meningitidis (group A strain Z2491)<br>>gi 7379701 emb CAB84268.1  (AL162754) putative amino acid permease integral membrane protein [Neisseria meningitidis] COG0765 Amino acid ABC transporter permease                                        |
| NGO0374 | 0.2672 | 2.05  | up   | 0.0191 | 2.56  | up   | 0.4749 | 1.26  | up   | putative ABC transporter; ATP-binding protein; amino acid\ Context:(NC_002946)+[367901-368656]\ Notes:Best Blastp Hit: pir    F81947 probable amino acid permease ATP-binding protein NMA1000 [imported] - Neisseria meningitidis (group A strain Z2491)<br>>gi 7379702 emb CAB84269.1  (AL162754) putative amino acid permease ATP-binding protein [Neisseria meningitidis] COG1126 ABC-type polar amino acid transport system                                          |

|         |        |        |      |        |        |      |        |        |      |                                                                                                                                                                                                                                                                                                                                                                                                                                                                                                                             |
|---------|--------|--------|------|--------|--------|------|--------|--------|------|-----------------------------------------------------------------------------------------------------------------------------------------------------------------------------------------------------------------------------------------------------------------------------------------------------------------------------------------------------------------------------------------------------------------------------------------------------------------------------------------------------------------------------|
| NGO0375 | 0.3588 | 1.69   | up   | 0.2253 | 3.60   | up   | 0.4799 | 1.38   | up   | Pgm\ Context:(NC_002946)-[368712-370094]\ Notes:Best Blastp Hit: sp P40390 PGMU_NEIGO phosphoglucomutase (glucose phosphomutase) (PGM) >gi 1073189 pir A53614 phosphoglucomutase (EC 5.4.2.2) - Neisseria gonorrhoeae (strain 1291) >gi 414527 gb AAA20588.1  (U02489) phosphoglucomutase [Neisseria gonorrhoeae] >gi 452116 gb AAA20399.1  (L23426) phosphoglucomutase [Neisseria gonorrhoeae] COG1109 Phosphomannomutase                                                                                                  |
| NGO0376 | 0.1139 | 2.99   | up   | 0.1042 | 1.88   | up   | 0.2631 | 1.98   | up   | putative peptidyl-prolyl cis-trans isomerase B\ Context:(NC_002946)-[370262-370771]\ Notes:Best Blastp Hit: pir F81156 peptidylprolyl isomerase (EC 5.2.1.8) B NMA1002 [similarity] - Neisseria meningitidis (group B strain MD58; group A strain Z2491) >gi 7226024 gb AAF41204.1  (AE002433) peptidyl-prolyl cis-trans isomerase [Neisseria meningitidis MC58] >gi 7379704 emb CAB84271.1  (AL162754) putative peptidyl-prolyl cis-trans isomerase B [Neisseria meningitidis] COG0652 Peptidyl-prolyl cis-trans isomerase |
| NGO0377 | 0.0002 | -33.96 | down | 0.0001 | -68.48 | down | 0.0328 | -12.48 | down | putative transport protein\ Context:(NC_002946)-[370891-372306]\ Notes:Best Blastp Hit: pir G81156 transporter; NadC family NMB0792 [imported] - Neisseria meningitidis (group B strain MD58) >gi 7226025 gb AAF41205.1  (AE002433) transporter; NadC family [Neisseria meningitidis MC58] COG0471 Cation transporters                                                                                                                                                                                                      |
| NGO0378 | 0.8933 | -1.19  | down | 0.4428 | -3.60  | down | 0.8906 | 1.29   | up   | hypothetical protein\ Context:(NC_002946)-[372535-372897]\ Notes:Best Blastp Hit: pir A81157 hypothetical protein NMB0794 [imported] - Neisseria meningitidis (group B strain MD58) >gi 7226027 gb AAF41207.1  (AE002433) hypothetical protein [Neisseria meningitidis MC58]                                                                                                                                                                                                                                                |
| NGO0379 | 0.7035 | 1.19   | up   | 0.2542 | -1.55  | down | 0.8426 | -1.05  | down | peptidyl-tRNA hydrolase\ Context:(NC_002946)-[373161-373739]\ Notes:Enables the recycling of peptidyl-tRNAs produced at termination of translation                                                                                                                                                                                                                                                                                                                                                                          |

|         |        |       |      |        |       |      |        |       |      |                                                                                                                                                                                                                                                                                                                                                                                                                                                                |
|---------|--------|-------|------|--------|-------|------|--------|-------|------|----------------------------------------------------------------------------------------------------------------------------------------------------------------------------------------------------------------------------------------------------------------------------------------------------------------------------------------------------------------------------------------------------------------------------------------------------------------|
| NGO0380 | 0.0587 | 3.90  | up   | 0.9805 | -1.01 | down | 0.5130 | -1.20 | down | hypothetical protein\ Context:(NC_002946)-[373792-374070]\ Notes:Best Blastp Hit: sp Q9JRC2 YA05_NEIMA hypothetical protein NMA1005/NMB0796 >gi 7226029 gb AAF41209.1  (AE002433) conserved hypothetical protein [Neisseria meningitidis MC58] >gi 7379707 emb CAB84274.1  (AL162754) hypothetical protein NMA1005 [Neisseria meningitidis]                                                                                                                    |
| NGO0381 | 0.9446 | -1.05 | down | 0.1612 | -1.97 | down | 0.1664 | -1.45 | down | hypothetical protein\ Context:(NC_002946)-[374063-374500]\ Notes:Best Blastp Hit: pir D81157 conserved hypothetical protein NMB0797 [imported] - Neisseria meningitidis (group B strain MD58) >gi 7226030 gb AAF41210.1  (AE002433) conserved hypothetical protein [Neisseria meningitidis MC58]                                                                                                                                                               |
| NGO0382 | 0.2729 | 1.79  | up   | 0.5897 | 1.21  | up   | 0.5565 | 1.23  | up   | hypothetical protein\ Context:(NC_002946)-[374716-376683]\ Notes:Best Blastp Hit: pir  E81157 cell division protein FtsH NMB0798 [imported] - Neisseria meningitidis (group B strain MD58) >gi 7226031 gb AAF41211.1  (AE002433) cell division protein FtsH [Neisseria meningitidis MC58] COG0465 ATP-dependent Zn proteases                                                                                                                                   |
| NGO0383 | 0.1061 | -2.48 | down | 0.3251 | -1.73 | down | 0.2742 | -2.69 | down | hypothetical protein\ Context:(NC_002946)-[376747-377367]\ Notes:Best Blastp Hit: pir  F81157 cell division protein FtsJ NMB0799 [imported] - Neisseria meningitidis (group B strain MD58; group A strain Z2491) >gi 7226032 gb AAF41212.1  (AE002433) cell division protein FtsJ [Neisseria meningitidis MC58] >gi 7379710 emb CAB84277.1  (AL162754) putative cell division protein [Neisseria meningitidis] COG0293 Methyltransferase FtsJ involved in cell |
| NGO0384 | 0.2159 | 2.15  | up   | 0.0968 | 1.95  | up   | 0.9860 | 1.00  | up   | hypothetical protein\ Context:(NC_002946)+[377477-377761]\ Notes:Best Blastp Hit: emb CAB84278.1  (AL162754) hypothetical protein NMA1009 [Neisseria meningitidis] COG1534 Predicted RNA-binding protein containing KH                                                                                                                                                                                                                                         |
| NGO0385 | 0.8764 | 1.07  | up   | 0.7850 | -1.14 | down | 0.2262 | -1.49 | down | delta-aminolevulinic acid dehydratase\ Context:(NC_002946)+[377930-378946]\ Notes:catalyzes the formation of porphobilinogen from 5-aminolevulinate                                                                                                                                                                                                                                                                                                            |

|         |        |       |      |        |       |      |        |       |      |                                                                                                                                                                                                                                                                                                                                                                   |
|---------|--------|-------|------|--------|-------|------|--------|-------|------|-------------------------------------------------------------------------------------------------------------------------------------------------------------------------------------------------------------------------------------------------------------------------------------------------------------------------------------------------------------------|
| NGO0386 | 0.7797 | 1.15  | up   | 0.6506 | -1.23 | down | 0.9651 | -1.01 | down | putative lyase\ Context:(NC_002946)-[379010-380167]\ Notes:Best Blastp Hit: pir    A81158 cystathionine beta-lyase (EC 4.4.1.8) NMB0802 [similarity] - Neisseria meningitidis (group B strain MD58) >gi 7226035 gb AAF41215.1  (AE002433) cystathionine gamma-synthase [Neisseria meningitidis MC58] COG0626 Cystathionine beta-lyases/cystathionine              |
| NGO0387 | 0.0935 | 2.65  | up   | 0.0675 | 5.84  | up   | 0.1193 | 1.58  | up   | putative GTP cyclohydrolase\ Context:(NC_002946)+[380370-381143]\ Notes:similar protein in Methanocaldococcus converts GTP to 7;8-dihydro-D-neopterin 2';3'-cyclic phosphate as the first step in methanopterin biosynthesis                                                                                                                                      |
| NGO0388 | 0.3397 | 1.51  | up   | 0.8842 | -1.09 | down | 0.1794 | 1.55  | up   | putative oxidoreductase; NAD(P)H-flavin\ Context:(NC_002946)+[381340-382005]\ Notes:Best Blastp Hit: pir    C81155 NAD(P)H nitroreductase; probable NMB0804 [imported] - Neisseria meningitidis (group B strain MD58) >gi 7226038 gb AAF41217.1  (AE002434) NAD(P)H nitroreductase; putative [Neisseria meningitidis MC58] COG0778 Nitroreductase family proteins |
| NGO0389 | 0.0065 | 9.91  | up   | 0.1109 | 5.71  | up   | 0.1842 | 2.09  | up   | hypothetical protein\ Context:(NC_002946)-[382060-382818]\ Notes:Best Blastp Hit: pir    E81155 conserved hypothetical protein NMB0806 [imported] - Neisseria meningitidis (group B strain MD58) >gi 7226040 gb AAF41219.1  (AE002434) conserved hypothetical protein [Neisseria meningitidis MC58] COG1187 Predicted pseudouridylate synthase family 1           |
| NGO0390 | 0.0603 | 3.56  | up   | 0.1337 | 9.32  | up   | 0.7127 | 1.21  | up   | inorganic polyphosphate/ATP-NAD kinase\ Context:(NC_002946)-[382843-383733]\ Notes:catalyzes the phosphorylation of NAD to NADP                                                                                                                                                                                                                                   |
| NGO0391 | 0.5566 | -1.28 | down | 0.5218 | -1.31 | down | 0.8057 | -1.07 | down | hypothetical protein\ Context:(NC_002946)-[383753-384319]\ Notes:Best Blastp Hit: pir    G81155 hypothetical protein NMB0808 [imported] - Neisseria meningitidis (group B strain MD58) >gi 7226042 gb AAF41221.1  (AE002434) hypothetical protein [Neisseria meningitidis MC58]                                                                                   |



|         |        |       |      |        |       |      |        |       |      |                                                                                                                                                                                                                                                                                                                                                                                                                                   |
|---------|--------|-------|------|--------|-------|------|--------|-------|------|-----------------------------------------------------------------------------------------------------------------------------------------------------------------------------------------------------------------------------------------------------------------------------------------------------------------------------------------------------------------------------------------------------------------------------------|
| NGO0392 | 0.3873 | 1.55  | up   | 0.4296 | 1.32  | up   | 0.3782 | 1.33  | up   | hypothetical protein\ Context:(NC_002946)-[384369-385145]\ Notes:Best Blastp Hit: pir    A81950 hypothetical protein NMA1019 [imported] - Neisseria meningitidis (group A strain Z2491) >gi 7379721 emb CAB84288.1  (AL162754) hypothetical protein NMA1019 [Neisseria meningitidis] COG0451 Nucleoside-diphosphate-sugar epimerases                                                                                              |
| NGO0393 | 0.8240 | 1.16  | up   | 0.9489 | 1.02  | up   | 0.9869 | 1.00  | up   | TetR family transcriptional regulator\ Context:(NC_002946)-[385200-385850]\ Notes:Best Blastp Hit: gb AAF41223.1  (AE002434) transcriptional regulator; TetR family [Neisseria meningitidis MC58] COG1309 Transcriptional regulators; AcrR family                                                                                                                                                                                 |
| NGO0394 | 0.7847 | -1.17 | down | 0.1603 | 1.94  | up   | 0.9649 | 1.01  | up   | putative UDP-N-acetylenolpyruvoylglucosamine reductase\ Context:(NC_002946)-[385862-386902]\ Notes:Best Blastp Hit: pir    C81950 probable UDP-N-acetylmuramate dehydrogenase (EC 1.1.1.158) NMA1021 [imported] - Neisseria meningitidis (group A strain Z2491) >gi 7379723 emb CAB84290.1  (AL162754) putative UDP-N-acetylenolpyruvoylglucosamine reductase [Neisseria meningitidis] COG0812 UDP-N-acetylmuramate dehydrogenase |
| NGO0395 | 0.5666 | -1.54 | down | 0.1920 | -3.75 | down | 0.5202 | -1.58 | down | multidrug efflux protein\ Context:(NC_002946)-[386946-388325]\ Notes:NorM; MdtK; functions as a Na(+)/drug antiporter; inactivation in Vibrio cholerae results in susceptibility to fluoroquinolones                                                                                                                                                                                                                              |
| NGO0396 | 0.0366 | 4.53  | up   | 0.2390 | 1.56  | up   | 0.6636 | -1.26 | down | hypothetical protein\ Context:(NC_002946)+[388382-388570]\ Notes:Best Blastp Hit: gb AAF41226.1  (AE002434) hypothetical protein [Neisseria meningitidis MC58]                                                                                                                                                                                                                                                                    |
| NGO0397 | 0.2747 | 1.80  | up   | 0.9027 | 1.06  | up   | 0.8161 | 1.07  | up   | ATP phosphoribosyltransferase regulatory subunit\ Context:(NC_002946)+[388662-389813]\ Notes:May allow the feedback regulation of ATP phosphoribosyltransferase activity by histidine                                                                                                                                                                                                                                             |
| NGO0398 | 0.6431 | 1.26  | up   | 0.8391 | 1.11  | up   | 0.5486 | 1.19  | up   | adenylosuccinate synthetase\ Context:(NC_002946)+[389912-391216]\ Notes:catalyzes the formation of N6-(1;2;-dicarboxyethyl)-AMP from L-aspartate; inosine monophosphate and GTP in AMP biosynthesis                                                                                                                                                                                                                               |

|         |        |      |    |        |       |    |        |       |      |                                                                                                                                                                                                                                                                                                                                                                                                                                    |
|---------|--------|------|----|--------|-------|----|--------|-------|------|------------------------------------------------------------------------------------------------------------------------------------------------------------------------------------------------------------------------------------------------------------------------------------------------------------------------------------------------------------------------------------------------------------------------------------|
| NGO0399 | 0.7333 | 1.24 | up | 0.8441 | 1.07  | up | 0.9247 | -1.04 | down | heat shock protein HtpX\ Context:(NC_002946)-[391452-392291]\ Notes:putative metalloprotease                                                                                                                                                                                                                                                                                                                                       |
| NGO0400 | 0.4589 | 1.47 | up | 0.7810 | 1.13  | up | 0.4733 | 1.23  | up   | adenylate kinase\ Context:(NC_002946)+[392506-393153]\ Notes:essential enzyme that recycles AMP in active cells; converts ATP and AMP to two molecules of ADP                                                                                                                                                                                                                                                                      |
| NGO0401 | 0.2094 | 2.08 | up | 0.6182 | 1.21  | up | 0.6001 | 1.16  | up   | orotidine 5'-phosphate decarboxylase\ Context:(NC_002946)+[393677-394417]\ Notes:OMP decarboxylase; OMPDCase; OMPdecase; type 1 subfamily; involved in last step of pyrimidine biosynthesis; converts orotidine 5'-phosphate to UMP and carbon dioxide; OMP decarboxylase; OMPDCase; OMPdecase                                                                                                                                     |
| NGO0402 | 0.3655 | 1.56 | up | 0.4043 | 1.33  | up | 0.7328 | 1.09  | up   | putative sugar kinase / ADP-heptose synthase\ Context:(NC_002946)+[394473-395435]\ Notes:Best Blastp Hit: gb AAF41238.1  (AE002435) ADP-heptose synthase; putative [Neisseria meningitidis MC58] COG0524 Sugar kinases; ribokinase family                                                                                                                                                                                          |
| NGO0403 | 0.1736 | 1.82 | up | 0.3332 | 2.05  | up | 0.4786 | -1.31 | down | ADP-L-glycero-D-mannoheptose epimerase\ Context:(NC_002946)+[395499-396503]\ Notes:Best Blastp Hit: gb AAA79173.1  (L07845) ADP-L-glycero-D-mannoheptose epimerase [Neisseria gonorrhoeae] COG0451 Nucleoside-diphosphate-sugar epimerases                                                                                                                                                                                         |
| NGO0404 | 0.0034 | 6.60 | up | 0.1162 | 4.38  | up | 0.0243 | 3.98  | up   | putative type I restriction-modification system methyltransferase protein\ Context:(NC_002946)+[396578-398122]\ Notes:Best Blastp Hit: pir F81152 type I restriction enzyme EcoR124II M protein NMB0829 [imported] - Neisseria meningitidis (group B strain MD58) >gi 7226064 gb AAF41241.1  (AE002436) type I restriction enzyme EcoR124II M protein [Neisseria meningitidis MC58] COG0286 Type I restriction-modification system |
| NGO0405 | 0.0172 | 5.82 | up | 0.0215 | 20.08 | up | 0.0694 | 7.25  | up   | DNA-damage-inducible protein D\ Context:(NC_002946)+[398238-399089]\ Notes:Best Blastp Hit: pir  G65165 DNA-damage-inducible protein d - Escherichia coli >gi 290495 gb AAA61998.1  (L10328) o278 [Escherichia coli] >gi 1790076 gb AAC76669.1  (AE000441) DNA-damage-inducible protein [Escherichia coli]                                                                                                                         |

|         |        |       |      |        |       |      |        |       |      |                                                                                                                                                                                                                                                                                                                                                                                                        |
|---------|--------|-------|------|--------|-------|------|--------|-------|------|--------------------------------------------------------------------------------------------------------------------------------------------------------------------------------------------------------------------------------------------------------------------------------------------------------------------------------------------------------------------------------------------------------|
| NGO0407 | 0.8402 | -1.14 | down | 0.4268 | 1.63  | up   | 0.2562 | 2.80  | up   | putative type I site-specific deoxyribonuclease\<br>Context:(NC_002946)+[400709-403807]\ Notes:Best Blastp Hit: gb AAF41246.1  (AE002436) type I restriction enzyme EcoR124II R protein; putative [Neisseria meningitidis MC58] COG0610 Restriction enzymes type I helicase subunits                                                                                                                   |
| NGO0408 | 0.8740 | -1.09 | down | 0.3537 | 1.40  | up   | 0.0736 | 1.78  | up   | hypothetical protein\<br>Context:(NC_002946)-[403847-406138]\ Notes:Best Blastp Hit: pir   D81153 ATP-dependent Clp proteinase; ATP-binding chain ClpA NMB0836 [imported] - Neisseria meningitidis (group B strain MD58) >gi 7226070 gb AAF41247.1  (AE002436) ATP-dependent Clp protease; ATP-binding subunit ClpA [Neisseria meningitidis MC58] COG0542 ATPases with chaperone activity; ATP-binding |
| NGO0409 | 0.1828 | -2.07 | down | 0.2998 | -1.62 | down | 0.8607 | -1.06 | down | hypothetical protein\<br>Context:(NC_002946)-[406140-406442]\ Notes:Best Blastp Hit: pir   E81153 conserved hypothetical protein NMB0837 [imported] - Neisseria meningitidis (group B strain MD58) >gi 7226071 gb AAF41248.1  (AE002436) conserved hypothetical protein [Neisseria meningitidis MC58] COG2127 Uncharacterized ACR                                                                      |
| NGO0410 | 0.4165 | 1.59  | up   | 0.9415 | -1.03 | down | 0.9027 | -1.05 | down | CspA\<br>Context:(NC_002946)+[406687-406890]\ Notes:Best Blastp Hit: pir   C81151 cold-shock domain family protein NMB0838 [imported] - Neisseria meningitidis (group B strain MD58) >gi 7226073 gb AAF41249.1  (AE002437) cold-shock domain family protein [Neisseria meningitidis MC58] COG1278 Cold shock proteins; putative cold shock protein                                                     |
| NGO0411 | 0.9145 | -1.06 | down | 0.4260 | -1.44 | down | 0.8222 | -1.07 | down | hypothetical protein\<br>Context:(NC_002946)-[407189-408520]\ Notes:Best Blastp Hit: pir   H81869 hypothetical protein NMA1048 [imported] - Neisseria meningitidis (group A strain Z2491) >gi 7379746 emb CAB84314.1  (AL162755) hypothetical protein NMA1048 [Neisseria meningitidis] COG0312 Predicted Zn-dependent proteases and their                                                              |

|         |        |       |      |        |       |      |        |       |      |                                                                                                                                                                                                                                                                                                                                     |
|---------|--------|-------|------|--------|-------|------|--------|-------|------|-------------------------------------------------------------------------------------------------------------------------------------------------------------------------------------------------------------------------------------------------------------------------------------------------------------------------------------|
| NGO0412 | 0.2800 | -1.81 | down | 0.2237 | -1.91 | down | 0.1231 | -1.75 | down | hypothetical protein\ Context:(NC_002946)+[408674-409180]\ Notes:Best Blastp Hit: pir    A81870 hypothetical protein NMA1049 [imported] - Neisseria meningitidis (group A strain Z2491) >gi 7379747 emb CAB84315.1  (AL162755) hypothetical protein NMA1049 [Neisseria meningitidis]                                                |
| NGO0413 | 0.4108 | -1.67 | down | 0.5978 | 1.23  | up   | 0.4518 | -1.23 | down | putative thiosulphate sulphur transferase\ Context:(NC_002946)+[409227-409940]\ Notes:Best Blastp Hit: gb AAF62913.1  (AF234832) putative thiosulphate sulphur transferase [Neisseria gonorrhoeae]                                                                                                                                  |
| NGO0414 | 0.6172 | 1.60  | up   | 0.1232 | -2.11 | down | 0.5096 | -1.50 | down | hypothetical protein\ Context:(NC_002946)+[410009-411709]\ Notes:Best Blastp Hit: gb AAF62912.1  (AF234832) RecJ [Neisseria gonorrhoeae] COG0608 Single-stranded DNA-specific exonuclease                                                                                                                                           |
| NGO0415 | 0.9113 | 1.06  | up   | 0.5878 | 1.18  | up   | 0.4663 | -1.36 | down | hypothetical protein\ Context:(NC_002946)+[412067-413425]\ Notes:Best Blastp Hit: emb CAB84318.1  (AL162755) putative poly(A) polymerase [Neisseria meningitidis] COG0617 tRNA nucleotidyltransferase/poly(A)                                                                                                                       |
| NGO0416 | 0.0437 | 3.32  | up   | 0.0292 | 2.69  | up   | 0.4411 | 1.23  | up   | hypothetical protein\ Context:(NC_002946)+[413598-413921]\ Notes:Best Blastp Hit: pir    A81152 hypothetical protein NMB0844 [imported] - Neisseria meningitidis (group B strain MD58) >gi 7226079 gb AAF41255.1  (AE002437) hypothetical protein [Neisseria meningitidis MC58]                                                     |
| NGO0417 | 0.0919 | -2.54 | down | 0.9511 | -1.03 | down | 0.1596 | -3.17 | down | hypothetical protein\ Context:(NC_002946)-[414026-414979]\ Notes:Best Blastp Hit: pir    F81870 hypothetical protein NMA1056 [imported] - Neisseria meningitidis (group A strain Z2491) >gi 7379752 emb CAB84320.1  (AL162755) hypothetical protein NMA1056 [Neisseria meningitidis] COG1702 Phosphate starvation-inducible protein |
| NGO0418 | 0.0352 | 4.09  | up   | 0.6044 | -1.58 | down | 0.8864 | 1.08  | up   | putative glycosyl transferase\ Context:(NC_002946)-[415005-415490]\ Notes:Best Blastp Hit: emb CAB84321.1  (AL162755) putative glycosyl transferase [Neisseria meningitidis] COG0438 Glycosyltransferases I                                                                                                                         |

|         |        |       |      |        |       |      |        |       |      |                                                                                                                                                                                                                                                                                                                                                                                                |
|---------|--------|-------|------|--------|-------|------|--------|-------|------|------------------------------------------------------------------------------------------------------------------------------------------------------------------------------------------------------------------------------------------------------------------------------------------------------------------------------------------------------------------------------------------------|
| NGO0419 | 0.3755 | -2.11 | down | 0.4174 | -2.23 | down | 0.7349 | -1.39 | down | hypothetical protein\ Context:(NC_002946)-[415590-416177]\ Notes:                                                                                                                                                                                                                                                                                                                              |
| NGO0420 | 0.0214 | 3.47  | up   | 0.0394 | 2.40  | up   | 0.0230 | 2.01  | up   | hypothetical protein\ Context:(NC_002946)+[416315-417049]\ Notes:Best Blastp Hit: pir   A81871 probable periplasmic protein NMA1059 [imported] - Neisseria meningitidis (group A strain Z2491)<br>>gi 7379755 emb CAB84323.1  (AL162755) putative periplasmic protein [Neisseria meningitidis]                                                                                                 |
| NGO0421 | 0.2650 | 2.65  | up   | 0.1187 | 8.78  | up   | 0.0715 | 5.37  | up   | deoxycytidine triphosphate deaminase\ Context:(NC_002946)-[417115-417681]\ Notes:Catalyzes the formation of dUTP from dCTP in thymidylate biosynthesis                                                                                                                                                                                                                                         |
| NGO0422 | 0.4294 | 1.58  | up   | 0.1074 | 3.59  | up   | 0.2736 | 1.61  | up   | hypothetical protein\ Context:(NC_002946)-[417777-418166]\ Notes:Best Blastp Hit: pir   C81871 probable periplasmic protein NMA1061 [imported] - Neisseria meningitidis (group A strain Z2491)<br>>gi 7379757 emb CAB84325.1  (AL162755) putative periplasmic protein [Neisseria meningitidis]                                                                                                 |
| NGO0423 | 0.3847 | 1.55  | up   | 0.0948 | 2.75  | up   | 0.2176 | 2.07  | up   | recombination associated protein\ Context:(NC_002946)-[418218-419117]\ Notes:Required for efficient pilin antigenic variation                                                                                                                                                                                                                                                                  |
| NGO0424 | 0.3866 | 1.48  | up   | 0.1537 | 3.30  | up   | 0.2104 | 1.45  | up   | GTP-binding protein EngA\ Context:(NC_002946)-[419148-420605]\ Notes:EngA; essential Neisserial GTPase; synchronizes cellular events by interacting with multiple targets with tandem G-domains; overexpression in Escherichia coli suppresses rrmJ mutation; structural analysis of the Thermotoga maritima ortholog shows different nucleotide binding affinities in the two binding domains |
| NGO0425 | 0.8381 | 1.11  | up   | 0.4366 | 1.44  | up   | 0.5380 | -1.71 | down | hypothetical protein\ Context:(NC_002946)-[420755-421384]\ Notes:Best Blastp Hit: possibly phase variable - 8A residue homopolymer repeat in the coding sequence (ON)                                                                                                                                                                                                                          |

|         |        |       |      |        |        |      |        |       |      |                                                                                                                                                                                                                                                                                                                                                                                                                                                                                            |
|---------|--------|-------|------|--------|--------|------|--------|-------|------|--------------------------------------------------------------------------------------------------------------------------------------------------------------------------------------------------------------------------------------------------------------------------------------------------------------------------------------------------------------------------------------------------------------------------------------------------------------------------------------------|
| NGO0426 | 0.6629 | -1.29 | down | 0.9819 | 1.01   | up   | 0.0620 | -2.06 | down | histidyl-tRNA synthetase\ Context:(NC_002946)-[421385-422680]\ Notes:catalyzes a two-step reaction; first charging a histidine molecule by linking its carboxyl group to the alpha-phosphate of ATP; followed by transfer of the aminoacyl-adenylate to its tRNA; class II aminoacyl-tRNA synthetase; forms homodimers; some organisms have a paralogous gene; hisZ; that is similar to hisS and produces a protein that performs the first step in histidine biosynthesis along with HisG |
| NGO0427 | 0.5582 | -1.40 | down | 0.0041 | -11.22 | down | 0.2494 | -3.64 | down | hypothetical protein\ Context:(NC_002946)-[422808-423464]\ Notes:Best Blastp Hit: emb CAB84330.1  (AL162755) putative periplasmic protein [Neisseria meningitidis] COG1101 ATPase components of various transport                                                                                                                                                                                                                                                                          |
| NGO0428 | 0.2072 | -2.39 | down | 0.0002 | -16.80 | down | 0.3222 | -2.74 | down | hypothetical protein\ Context:(NC_002946)-[423520-423744]\ Notes:Best Blastp Hit: emb CAB84342.1  (AL162755) hypothetical protein NMA1079 [Neisseria meningitidis]                                                                                                                                                                                                                                                                                                                         |
| NGO0429 | 0.1976 | -4.49 | down | 0.0209 | -25.47 | down | 0.5215 | -2.06 | down | hypothetical protein\ Context:(NC_002946)-[423973-424110]\ Notes:Best Blastp Hit: emb CAB84343.1  (AL162755) hypothetical protein NMA1080 [Neisseria meningitidis]                                                                                                                                                                                                                                                                                                                         |
| NGO0430 | 0.0080 | -4.58 | down | 0.1128 | -5.42  | down | 0.3425 | 1.97  | up   | hypothetical protein\ Context:(NC_002946)-[425228-425518]\ Notes:Best Blastp Hit: gb AAF41275.1  (AE002439) hypothetical protein [Neisseria meningitidis MC58]                                                                                                                                                                                                                                                                                                                             |
| NGO0432 | 0.9998 | 1.00  | up   | 0.0310 | -5.30  | down | 0.6151 | -1.49 | down | hypothetical protein\ Context:(NC_002946)-[426078-426620]\ Notes:Best Blastp Hit: pir   A81874 probable periplasmic protein NMA1084 [imported] - Neisseria meningitidis (group A strain Z2491) >gi 7379779 emb CAB84347.1  (AL162755) putative periplasmic protein [Neisseria meningitidis]                                                                                                                                                                                                |
| NGO0433 | 0.1420 | -2.80 | down | 0.0046 | -8.84  | down | 0.5236 | -1.48 | down | hypothetical protein\ Context:(NC_002946)+[426786-427709]\ Notes:Best Blastp Hit: emb CAB84348.1  (AL162755) hypothetical protein NMA1085 [Neisseria meningitidis] COG0564 Predicted pseudouridylate synthase family 2                                                                                                                                                                                                                                                                     |

|         |        |      |    |        |       |      |        |       |      |                                                                                                                                                                                                                                                                                                                                                                         |
|---------|--------|------|----|--------|-------|------|--------|-------|------|-------------------------------------------------------------------------------------------------------------------------------------------------------------------------------------------------------------------------------------------------------------------------------------------------------------------------------------------------------------------------|
| NGO0434 | 0.0119 | 5.84 | up | 0.3117 | 1.85  | up   | 0.2310 | 1.67  | up   | hypothetical protein\ Context:(NC_002946)-[427788-428429]\ Notes:Best Blastp Hit: pir     C81874 hypothetical protein NMA1086 [imported] - Neisseria meningitidis (group A strain Z2491) >gi 7379781 emb CAB84349.1  (AL162755) hypothetical protein NMA1086 [Neisseria meningitidis]                                                                                   |
| NGO0435 | 0.5845 | 1.49 | up | 0.7283 | -1.19 | down | 0.3559 | -1.35 | down | spermidine synthase\ Context:(NC_002946)-[428484-429275]\ Notes:catalyzes the formation of spermidine from putrescine and S-adenosylmethioninamine                                                                                                                                                                                                                      |
| NGO0436 | 0.7201 | 1.27 | up | 0.1892 | -1.96 | down | 0.2811 | -1.38 | down | 3-methyl-2-oxobutanoatehydroxymethyltransferase\ Context:(NC_002946)+[429658-430449]\ Notes:catalyzes the formation of tetrahydrofolate and 2-dehydropantoate from 5;10-methylenetetrahydrofolate and 3-methyl-2-oxobutanoate                                                                                                                                           |
| NGO0437 | 0.7170 | 1.25 | up | 0.7789 | -1.14 | down | 0.0864 | -2.46 | down | pantoate--beta-alanine ligase\ Context:(NC_002946)+[430572-431408]\ Notes:catalyzes the formation of (R)-pantothenate from pantoate and beta-alanine                                                                                                                                                                                                                    |
| NGO0439 | 0.9283 | 1.04 | up | 0.4709 | -1.36 | down | 0.3871 | -1.29 | down | outer membrane lipoprotein LolB\ Context:(NC_002946)+[433712-434293]\ Notes:Incorporates lipoproteins in the outer membrane after they are released by the LolA protein                                                                                                                                                                                                 |
| NGO0440 | 0.6148 | 1.26 | up | 0.4272 | -1.50 | down | 0.9233 | -1.03 | down | putative isopentenyl monophosphate kinase\ Context:(NC_002946)+[434303-435148]\ Notes:Best Blastp Hit: pir     B81149 conserved hypothetical protein NMB0874 [imported] - Neisseria meningitidis (group B strain MD58) >gi 7226111 gb AAF41285.1  (AE002439) conserved hypothetical protein [Neisseria meningitidis MC58] COG1947 Uncharacterized ACR; YchB/YabH family |
| NGO0441 | 0.2774 | 1.80 | up | 0.5295 | 1.26  | up   | 0.5033 | -1.21 | down | ribose-phosphate pyrophosphokinase\ Context:(NC_002946)+[435487-436470]\ Notes:catalyzes the formation of 5-phospho-alpha-D-ribose 1-phosphate from D-ribose 5-phosphate and ATP                                                                                                                                                                                        |

|         |        |       |      |        |        |      |        |       |      |                                                                                                                                                                                                                                                                                                                                                                                                           |
|---------|--------|-------|------|--------|--------|------|--------|-------|------|-----------------------------------------------------------------------------------------------------------------------------------------------------------------------------------------------------------------------------------------------------------------------------------------------------------------------------------------------------------------------------------------------------------|
| NGO0442 | 0.2620 | 2.02  | up   | 0.3905 | 1.33   | up   | 0.4523 | 1.28  | up   | 50S ribosomal protein L25/general stress protein Ctc\<br>Context:(NC_002946)+[436537-437109]\ Notes:the Ctc family of proteins consists of two types; one that contains the N-terminal ribosomal protein L25 domain only which in Escherichia coli binds the 5S rRNA while a subset of proteins contain a C-terminal extension that is involved in the stress response                                    |
| NGO0443 | 0.0035 | -5.30 | down | 0.0545 | -5.67  | down | 0.2999 | -2.22 | down | putative D-alanyl-D-alanine carboxypeptidase / penicillin binding protein\<br>Context:(NC_002946)-[437235-438404]\ Notes:Best Blastp Hit: pir   H81146 penicillin-binding protein NMB0877 [imported] - Neisseria meningitidis (group B strain MD58) >gi 7226115 gb AAF41288.1  (AE002440) penicillin-binding protein [Neisseria meningitidis MC58] COG1686 D-alanyl-D-alanine carboxypeptidase            |
| NGO0444 | 0.1835 | -1.92 | down | 0.4501 | -1.62  | down | 0.8010 | -1.15 | down | threonine dehydratase\<br>Context:(NC_002946)+[438553-440079]\ Notes:threonine deaminase; threonine dehydratase; in Escherichia coli; IlvA is part of the isoleucine biosynthetic pathway                                                                                                                                                                                                                 |
| NGO0445 | 0.0215 | -4.26 | down | 0.0580 | -7.63  | down | 0.7637 | 1.20  | up   | putative ABC transporter; ATP-binding protein\<br>Context:(NC_002946)-[440135-441211]\ Notes:Best Blastp Hit: pir   F81875 sulfate ABC transporter; ATP-binding protein NMA1097 [similarity] - Neisseria meningitidis (group A strain Z2491) >gi 7379792 emb CAB84360.1  (AL162755) putative sulphate permease ATP-binding protein [Neisseria meningitidis] COG1118 ABC-type sulfate/molybdenum transport |
| NGO0446 | 0.3026 | -2.74 | down | 0.0259 | -10.04 | down | 0.0455 | 2.32  | up   | putative ABC transporter\<br>Context:(NC_002946)-[441352-442173]\ Notes:Best Blastp Hit: pir   C81147 sulfate ABC transporter; permease protein NMB0880 [imported] - Neisseria meningitidis (group B strain MD58) >gi 7226118 gb AAF41291.1  (AE002440) sulfate ABC transporter; permease protein [Neisseria meningitidis MC58] COG0555 ABC-type cysteine/molybdate transport                             |



|         |        |       |      |        |       |      |        |       |      |                                                                                                                                                                                                                                                                                                                                    |
|---------|--------|-------|------|--------|-------|------|--------|-------|------|------------------------------------------------------------------------------------------------------------------------------------------------------------------------------------------------------------------------------------------------------------------------------------------------------------------------------------|
| NGO0448 | 0.2010 | -2.21 | down | 0.0802 | -2.47 | down | 0.6709 | -1.30 | down | hypothetical protein\ Context:(NC_002946)+[443377-443709]\ Notes:Best Blastp Hit: pir     B81876 hypothetical protein NMA1101 [imported] - Neisseria meningitidis (group A strain Z2491) >gi 7379796 emb CAB84364.1  (AL162755) hypothetical protein NMA1101 [Neisseria meningitidis]                                              |
| NGO0449 | 0.1720 | 2.30  | up   | 0.4099 | 1.44  | up   | 0.3683 | 1.41  | up   | hypothetical protein\ Context:(NC_002946)+[444039-444548]\ Notes:Best Blastp Hit: gb AAF41294.1  (AE002440) conserved hypothetical protein [Neisseria meningitidis MC58] >gi 7379797 emb CAB84365.1  (AL162755) putative integral membrane protein [Neisseria meningitidis] COG1755 Uncharacterized BCR; YpbQ family               |
| NGO0451 | 0.0774 | 4.63  | up   | 0.0395 | 2.16  | up   | 0.3976 | 1.30  | up   | replicative DNA helicase\ Context:(NC_002946)+[445524-446930]\ Notes:unwinds double stranded DNA                                                                                                                                                                                                                                   |
| NGO0452 | 0.4533 | 1.49  | up   | 0.7038 | 1.20  | up   | 0.9699 | -1.01 | down | hypothetical protein\ Context:(NC_002946)+[447238-447903]\ Notes:Best Blastp Hit: pir     F81876 hypothetical protein NMA1106 [imported] - Neisseria meningitidis (group A strain Z2491) >gi 7379800 emb CAB84368.1  (AL162755) hypothetical protein NMA1106 [Neisseria meningitidis]                                              |
| NGO0453 | 0.4598 | 1.45  | up   | 0.5081 | -1.54 | down | 0.6571 | -1.15 | down | hypothetical protein\ Context:(NC_002946)+[447935-448546]\ Notes:Best Blastp Hit: pir     F81145 type IV pilus assembly protein PilV; probable NMB0887 [imported] - Neisseria meningitidis (group B strain MD58) >gi 7226125 gb AAF41297.1  (AE002441) type IV pilus assembly protein PilV; putative [Neisseria meningitidis MC58] |
| NGO0454 | 0.5060 | 1.46  | up   | 0.8523 | 1.09  | up   | 0.8281 | -1.08 | down | hypothetical protein\ Context:(NC_002946)+[448543-449523]\ Notes:Best Blastp Hit: pir     H81876 probable membrane protein NMA1108 [imported] - Neisseria meningitidis (group A strain Z2491) >gi 7379802 emb CAB84370.1  (AL162755) putative membrane protein [Neisseria meningitidis]                                            |

|         |        |       |      |        |       |      |        |       |      |                                                                                                                                                                                                                                                                                                                                                                                                                                            |
|---------|--------|-------|------|--------|-------|------|--------|-------|------|--------------------------------------------------------------------------------------------------------------------------------------------------------------------------------------------------------------------------------------------------------------------------------------------------------------------------------------------------------------------------------------------------------------------------------------------|
| NGO0455 | 0.1675 | 2.24  | up   | 0.3439 | 1.53  | up   | 0.7674 | 1.11  | up   | hypothetical protein\ Context:(NC_002946)+[449502-450113]\ Notes:Best Blastp Hit: pir    H81145 hypothetical protein NMB0889 [imported] - Neisseria meningitidis (group B strain MD58) >gi 7226127 gb AAF41299.1  (AE002441) hypothetical protein [Neisseria meningitidis MC58]                                                                                                                                                            |
| NGO0456 | 0.1842 | 2.19  | up   | 0.3264 | 1.52  | up   | 0.5407 | 1.24  | up   | putative type IV pilin-like protein\ Context:(NC_002946)+[450100-450588]\ Notes:Best Blastp Hit: gb AAF62322.1  (AE002441) type IV pilin-related protein [Neisseria meningitidis MC58]                                                                                                                                                                                                                                                     |
| NGO0457 | 0.0120 | 6.38  | up   | 0.9980 | 1.00  | up   | 0.8256 | 1.19  | up   | hypothetical protein\ Context:(NC_002946)-[450658-450966]\ Notes:                                                                                                                                                                                                                                                                                                                                                                          |
| NGO0459 | 0.5484 | -1.29 | down | 0.5389 | -1.33 | down | 0.6351 | -1.20 | down | deoxyuridine 5'-triphosphate nucleotidohydrolase\ Context:(NC_002946)+[451840-452292]\ Notes:catalyzes the formation of dUMP from dUTP                                                                                                                                                                                                                                                                                                     |
| NGO0460 | 0.4330 | -1.45 | down | 0.6354 | -1.27 | down | 0.4433 | -1.32 | down | hypothetical protein\ Context:(NC_002946)+[452364-453551]\ Notes:Best Blastp Hit: gb AAF41303.1  (AE002441) aminotransferase; class I [Neisseria meningitidis MC58] COG0436 PLP-dependent aminotransferases                                                                                                                                                                                                                                |
| NGO0461 | 0.1390 | 2.18  | up   | 0.1158 | 1.84  | up   | 0.3750 | 1.31  | up   | hypothetical protein\ Context:(NC_002946)+[453863-454642]\ Notes:Best Blastp Hit: pir    F81877 hypothetical protein NMA1114 [imported] - Neisseria meningitidis (group A strain Z2491) >gi 7379808 emb CAB84376.1  (AL162755) hypothetical protein NMA1114 [Neisseria meningitidis]                                                                                                                                                       |
| NGO0462 | 0.0332 | -3.51 | down | 0.1550 | -2.16 | down | 0.6434 | -1.25 | down | putative phage integrase; putative phage associated protein\ Context:(NC_002946)+[455173-456369]\ Notes:Best Blastp Hit: pir    B82272 integrase; phage family VC0847 [imported] - Vibrio cholerae (group O1 strain N16961) >gi 498253 gb AAC44230.1  (U02372) integrase [Vibrio cholerae] >gi 1100883 gb AAA82714.1  (U39068) integrase [Vibrio cholerae] >gi 9655299 gb AAF94009.1  (AE004170) integrase; phage family [Vibrio cholerae] |
| NGO0463 | 0.8679 | 1.12  | up   | 0.0602 | -5.72 | down | 0.3211 | -2.17 | down | putative phage associated protein\ Context:(NC_002946)-[456725-456994]\ Notes:                                                                                                                                                                                                                                                                                                                                                             |

|         |        |       |      |        |       |      |        |       |      |                                                                                                                                                                                                                                                                                                                                   |
|---------|--------|-------|------|--------|-------|------|--------|-------|------|-----------------------------------------------------------------------------------------------------------------------------------------------------------------------------------------------------------------------------------------------------------------------------------------------------------------------------------|
| NGO0464 | 0.9598 | 1.06  | up   | 0.0932 | -8.60 | down | 0.1602 | -3.99 | down | putative phage associated protein\ Context:(NC_002946)-[457189-457872]\ Notes:Best Blastp Hit: gb AAF94355.1  (AE004199) hypothetical protein [Vibrio cholerae]                                                                                                                                                                   |
| NGO0465 | 0.0551 | -2.72 | down | 0.0051 | -5.66 | down | 0.6500 | -1.21 | down | putative phage associated protein\ Context:(NC_002946)-[457883-458419]\ Notes:                                                                                                                                                                                                                                                    |
| NGO0467 | 0.1375 | 2.20  | up   | 0.4566 | 1.32  | up   | 0.6611 | -1.33 | down | putative phage associated protein\ Context:(NC_002946)-[458797-459288]\ Notes:Best Blastp Hit: pir T13296 hypothetical protein 8 - Streptococcus phage phi-O1205 >gi 2444088 gb AAC79524.1  (U88974) ORF8 [Streptococcus thermophilus temperate bacteriophage O1205]                                                              |
| NGO0471 | 0.3575 | -2.07 | down | 0.5102 | -1.30 | down | 0.5713 | -1.20 | down | putative phage associated protein\ Context:(NC_002946)-[460520-460735]\ Notes:Best Blastp Hit: gb AAF41312.1  (AE002442) hypothetical protein [Neisseria meningitidis MC58]                                                                                                                                                       |
| NGO0472 | 0.0611 | 2.82  | up   | 0.1902 | 1.57  | up   | 0.2702 | 1.44  | up   | putative phage associated protein\ Context:(NC_002946)-[460949-461236]\ Notes:                                                                                                                                                                                                                                                    |
| NGO0475 | 0.3040 | 1.57  | up   | 0.0497 | 3.32  | up   | 0.9090 | -1.06 | down | putative phage associated protein\ Context:(NC_002946)-[462203-462403]\ Notes:                                                                                                                                                                                                                                                    |
| NGO0476 | 0.9421 | -1.04 | down | 0.4053 | -1.47 | down | 0.1750 | -1.59 | down | putative phage associated protein\ Context:(NC_002946)-[462601-463014]\ Notes:Best Blastp Hit: sp P41637 CADH_PINTA cinnamyl-alcohol dehydrogenase (CAD) >gi 1076238 pir  S49443 cinnamyl-alcohol dehydrogenase (EC 1.1.1.195) A - loblolly pine >gi 558385 emb CAA86072.1  (Z37991) cinnamyl alcohol dehydrogenase [Pinus taeda] |
| NGO0477 | 0.9076 | -1.06 | down | 0.5973 | -1.27 | down | 0.2917 | -1.40 | down | putative phage associated protein\ Context:(NC_002946)-[463011-463448]\ Notes:Best Blastp Hit: sp P55409 Y4DJ_RHISN hypothetical transcriptional regulator Y4DJ >gi 7465604 pir  T02773 y4dJ protein - Rhizobium sp. plasmid pNGR234a >gi 2182353 gb AAB91639.1  (AE000069) Y4dJ [Rhizobium sp. NGR234]                           |
| NGO0478 | 0.7193 | 1.20  | up   | 0.8680 | -1.07 | down | 0.6544 | -1.15 | down | putative phage associated protein\ Context:(NC_002946)-[463489-463926]\ Notes:                                                                                                                                                                                                                                                    |

|         |        |       |      |        |        |      |        |       |      |                                                                                                                                                                                                                                                                                                                                                                                                                                                              |
|---------|--------|-------|------|--------|--------|------|--------|-------|------|--------------------------------------------------------------------------------------------------------------------------------------------------------------------------------------------------------------------------------------------------------------------------------------------------------------------------------------------------------------------------------------------------------------------------------------------------------------|
| NGO0479 | 0.1228 | -2.26 | down | 0.5170 | 2.07   | up   | 0.4560 | 1.53  | up   | putative lambda repressor protein cI; putative phage associated protein\ Context:(NC_002946)-[464039-464755]\ Notes:Best Blastp Hit: gb AAF83310.1 AE003899_2 (AE003899) phage-related repressor protein [Xylella fastidiosa]                                                                                                                                                                                                                                |
| NGO0482 | 0.2078 | -2.19 | down | 0.0108 | -10.37 | down | 0.9981 | 1.00  | up   | putative phage associated protein\ Context:(NC_002946)-[465465-465827]\ Notes:                                                                                                                                                                                                                                                                                                                                                                               |
| NGO0484 | 0.0397 | -8.67 | down | 0.0051 | -44.79 | down | 0.8421 | -1.29 | down | putative phage associated protein\ Context:(NC_002946)+[465978-467042]\ Notes:Best Blastp Hit: gi 9634200 Gp54 [Bacteriophage HK97] >gi 6901629 gb AAF31132.1 (AF069529) Gp54 [Bacteriophage HK97]                                                                                                                                                                                                                                                           |
| NGO0485 | 0.6250 | 1.59  | up   | 0.0490 | -7.16  | down | 0.5044 | 1.77  | up   | putative replicative DNA helicase; putative phage associated protein\ Context:(NC_002946)+[467039-468400]\ Notes:Best Blastp Hit: sp P37469 DNAC_BACSU replicative DNA helicase >gi 2127189 pir   S65970 replicative DNA helicase dnaC - Bacillus subtilis >gi 467330 dbj BAA05176.1 (D26185) replicative DNA helicase [Bacillus subtilis] >gi 2636591 emb CAB16081.1 (Z99124) replicative DNA helicase [Bacillus subtilis] COG0305 Replicative DNA helicase |
| NGO0487 | 0.1175 | 2.44  | up   | 0.0652 | 2.42   | up   | 0.4810 | 1.41  | up   | putative phage associated protein\ Context:(NC_002946)+[468740-469234]\ Notes:                                                                                                                                                                                                                                                                                                                                                                               |
| NGO0488 | 0.0761 | -3.49 | down | 0.1881 | -2.20  | down | 0.8544 | 1.09  | up   | putative phage associated protein\ Context:(NC_002946)+[469411-469560]\ Notes:                                                                                                                                                                                                                                                                                                                                                                               |
| NGO0489 | 0.8392 | 1.19  | up   | 0.0716 | -3.29  | down | 0.6553 | -1.21 | down | putative phage associated protein\ Context:(NC_002946)+[469696-470241]\ Notes:Best Blastp Hit: sp Q37873 RUSA_BP82 crossover junction endodeoxyribonuclease RusA (Holliday junction nuclease RusA) (Holliday junction resolvase) >gi 2120247 pir   S66583 crossover junction endodeoxyribonuclease (EC 3.1.22.4) rusA - phage 82 >gi 1051116 emb CAA63330.1 (X92588) Can suppress the phenotype of ruv mutants [Bacteriophage 82]                            |
| NGO0490 | 0.7139 | 1.34  | up   | 0.3080 | -2.47  | down | 0.2413 | -2.16 | down | putative phage associated protein\ Context:(NC_002946)+[470231-470464]\ Notes:                                                                                                                                                                                                                                                                                                                                                                               |
| NGO0491 | 0.0319 | -5.16 | down | 0.0005 | -37.07 | down | 0.0520 | -4.72 | down | putative phage associated protein\ Context:(NC_002946)+[470508-470915]\ Notes:                                                                                                                                                                                                                                                                                                                                                                               |

|         |        |       |      |        |       |      |        |       |      |                                                                                                                                                                                                                                                                                                                                                                                                         |
|---------|--------|-------|------|--------|-------|------|--------|-------|------|---------------------------------------------------------------------------------------------------------------------------------------------------------------------------------------------------------------------------------------------------------------------------------------------------------------------------------------------------------------------------------------------------------|
| NGO0492 | 0.4768 | -1.37 | down | 0.5048 | -1.37 | down | 0.1993 | -1.59 | down | putative phage associated protein\<br>Context:(NC_002946)+[471138-471644]\ Notes:Best Blastp<br>Hit: pir     F69137 hypothetical protein MTH296 -<br>Methanobacterium thermoautotrophicum (strain Delta H)<br>>gi 2621349 gb AAB84802.1  (AE000815) unknown<br>[Methanobacterium thermoautotrophicum]                                                                                                   |
| NGO0493 | 0.5308 | -1.72 | down | 0.6003 | 1.70  | up   | 0.8990 | -1.11 | down | putative phage associated protein\<br>Context:(NC_002946)+[471965-472186]\ Notes:                                                                                                                                                                                                                                                                                                                       |
| NGO0494 | 0.7293 | 1.39  | up   | 0.1015 | -4.85 | down | 0.5900 | -1.31 | down | putative phage associated protein\<br>Context:(NC_002946)+[472479-472928]\ Notes:Best Blastp<br>Hit: sp P76546 YFFO_ECOLI hypothetical 15.7 KDA protein<br>in EutB-EutH intergenic region >gi 7466364 pir   E65019<br>hypothetical protein b2446 - Escherichia coli (strain K-12)<br>>gi 1788787 gb AAC75499.1  (AE000331) orf;<br>hypothetical protein [Escherichia coli]                              |
| NGO0495 | 0.2413 | -1.78 | down | 0.2136 | -2.13 | down | 0.5664 | 1.40  | up   | putative phage associated protein\<br>Context:(NC_002946)+[472990-474411]\ Notes:Best Blastp<br>Hit: pir     H82649 hypothetical protein XF1674 XF1569<br>[imported] - Xylella fastidiosa (strain 9a5c)<br>>gi 9106614 gb AAF84378.1 AE003986_8 (AE003986)<br>hypothetical protein [Xylella fastidiosa]<br>>gi 9106736 gb AAF84483.1 AE003993_2 (AE003993)<br>hypothetical protein [Xylella fastidiosa] |
| NGO0496 | 0.0626 | -4.38 | down | 0.0361 | -5.40 | down | 0.8859 | 1.06  | up   | putative phage associated protein\<br>Context:(NC_002946)+[474408-476555]\ Notes:Best Blastp<br>Hit: pir     G81057 hypothetical protein NMB1656 [imported]<br>- Neisseria meningitidis (group B strain MD58)<br>>gi 7226908 gb AAF42005.1  (AE002516) hypothetical<br>protein [Neisseria meningitidis MC58]                                                                                            |
| NGO0497 | 0.2712 | -2.28 | down | 0.0971 | -3.75 | down | 0.2414 | -2.35 | down | putative phage associated protein\<br>Context:(NC_002946)+[476623-477780]\ Notes:Best Blastp<br>Hit: pir     B81819 hypothetical protein NMA1914 [imported]<br>- Neisseria meningitidis (group A strain Z2491)<br>>gi 7380548 emb CAB85135.1  (AL162757) hypothetical<br>protein [Neisseria meningitidis]                                                                                               |
| NGO0498 | 0.1126 | -3.82 | down | 0.0426 | -7.72 | down | 0.4108 | -1.84 | down | putative phage associated protein\<br>Context:(NC_002946)+[477821-479320]\ Notes:Best Blastp<br>Hit: sp P23739 SUIS_RAT sucrase-isomaltase; intestinal<br>[contains: sucrase ; isomaltase ]                                                                                                                                                                                                             |

|         |        |        |      |        |        |      |        |       |      |                                                                                                                                                                                                                                                                                                                                                                                                                                                                                                             |
|---------|--------|--------|------|--------|--------|------|--------|-------|------|-------------------------------------------------------------------------------------------------------------------------------------------------------------------------------------------------------------------------------------------------------------------------------------------------------------------------------------------------------------------------------------------------------------------------------------------------------------------------------------------------------------|
| NGO0499 | 0.3674 | -2.08  | down | 0.2443 | -4.70  | down | 0.9071 | 1.16  | up   | putative phage associated protein\<br>Context:(NC_002946)+[479327-479689]\ Notes:                                                                                                                                                                                                                                                                                                                                                                                                                           |
| NGO0500 | 0.1051 | 2.67   | up   | 0.9673 | -1.03  | down | 0.8949 | 1.07  | up   | putative phage associated protein\<br>Context:(NC_002946)+[479692-480222]\ Notes:                                                                                                                                                                                                                                                                                                                                                                                                                           |
| NGO0501 | 0.3938 | -2.06  | down | 0.0251 | -10.08 | down | 0.0082 | -4.81 | down | putative phage associated protein\<br>Context:(NC_002946)+[480370-480702]\ Notes:                                                                                                                                                                                                                                                                                                                                                                                                                           |
| NGO0502 | 0.1907 | 2.32   | up   | 0.2920 | -3.52  | down | 0.5113 | -1.98 | down | putative phage associated protein\<br>Context:(NC_002946)+[480699-481127]\ Notes:                                                                                                                                                                                                                                                                                                                                                                                                                           |
| NGO0503 | 0.7560 | 1.24   | up   | 0.3363 | -2.32  | down | 0.5373 | -1.21 | down | putative phage associated protein\<br>Context:(NC_002946)+[481153-481926]\ Notes:                                                                                                                                                                                                                                                                                                                                                                                                                           |
| NGO0504 | 0.4724 | 2.42   | up   | 0.1899 | -3.87  | down | 0.4443 | -1.90 | down | putative phage associated protein\<br>Context:(NC_002946)+[481987-482316]\ Notes:                                                                                                                                                                                                                                                                                                                                                                                                                           |
| NGO0505 | 0.4680 | -2.12  | down | 0.0043 | -18.89 | down | 0.5371 | -1.38 | down | putative phage associated protein\<br>Context:(NC_002946)+[482328-482594]\ Notes:Best Blastp<br>Hit: gb AAD32742.1  (AF127374) MmcR [Streptomyces<br>lavendulae]                                                                                                                                                                                                                                                                                                                                            |
| NGO0506 | 0.0901 | -3.16  | down | 0.1044 | -6.84  | down | 0.2176 | -2.23 | down | putative phage associated protein\<br>Context:(NC_002946)+[482594-483193]\ Notes:                                                                                                                                                                                                                                                                                                                                                                                                                           |
| NGO0507 | 0.0015 | -20.67 | down | 0.1267 | -7.24  | down | 0.0089 | -4.78 | down | putative phage associated protein\<br>Context:(NC_002946)+[483190-484044]\ Notes:                                                                                                                                                                                                                                                                                                                                                                                                                           |
| NGO0508 | 0.0488 | -5.68  | down | 0.0130 | -28.14 | down | 0.1535 | -2.97 | down | putative phage associated protein\<br>Context:(NC_002946)+[484046-484477]\ Notes:Best Blastp<br>Hit: sp P77685 SPR_ECOLI lipoprotein SPR precursor<br>>gi 7430106 pir   F64986 hypothetical protein b2175 -<br>Escherichia coli (strain K-12)<br>>gi 1498150 dbj BAA13140.1  (D86610) Spr [Escherichia<br>coli] >gi 1736840 dbj BAA15983.1  (D90849) Probable<br>lipoprotein NlpC homolog precursor. [Escherichia coli]<br>>gi 1788501 gb AAC75236.1  (AE000307) putative<br>lipoprotein [Escherichia coli] |
| NGO0509 | 0.6482 | 1.23   | up   | 0.6280 | 1.22   | up   | 0.8221 | -1.07 | down | putative phage associated protein\<br>Context:(NC_002946)-<br>[484505-484786]\ Notes:Best Blastp Hit:<br>gb AAF84381.1 AE003986_11 (AE003986) hypothetical<br>protein [Xylella fastidiosa]<br>>gi 9106739 gb AAF84486.1 AE003993_5 (AE003993)<br>hypothetical protein [Xylella fastidiosa]                                                                                                                                                                                                                  |

|         |        |        |      |        |        |      |        |       |      |                                                                                                                                                                                                                                                                                                                                                  |
|---------|--------|--------|------|--------|--------|------|--------|-------|------|--------------------------------------------------------------------------------------------------------------------------------------------------------------------------------------------------------------------------------------------------------------------------------------------------------------------------------------------------|
| NGO0510 | 0.0571 | -16.53 | down | 0.0435 | -22.39 | down | 0.4706 | -2.57 | down | putative phage associated protein\<br>Context:(NC_002946)+[485026-489171]\ Notes:Best Blastp<br>Hit: gi 10955733 phage lambda host specific protein J<br>[Yersinia pestis] >gi 7467468 pir T14652 protein J -<br>Yersinia pestis plasmid pMT1<br>>gi 2996342 gb AAC13222.1  (AF053947) phage lambda<br>host specific protein J [Yersinia pestis] |
| NGO0511 | 0.0032 | -7.67  | down | 0.0117 | -10.90 | down | 0.1416 | -3.45 | down | hypothetical protein\<br>Context:(NC_002946)+[489283-<br>489588]\ Notes:                                                                                                                                                                                                                                                                         |
| NGO0512 | 0.0238 | -8.10  | down | 0.0057 | -53.52 | down | 0.2830 | 1.94  | up   | putative phage associated protein\<br>Context:(NC_002946)-<br>[489593-490528]\ Notes:Best Blastp Hit:<br>gb AAB32262.1 S75490_1 (S75490) orf2 [Neisseria<br>gonorrhoeae]                                                                                                                                                                         |
| NGO0513 | 0.2643 | -3.61  | down | 0.0082 | -24.63 | down | 0.7052 | 1.52  | up   | putative phage associated protein\<br>Context:(NC_002946)+[489659-490129]\ Notes:                                                                                                                                                                                                                                                                |
| NGO0514 | 0.7176 | -1.74  | down | 0.8348 | 1.09   | up   | 0.5730 | -1.48 | down | putative phage associated protein\<br>Context:(NC_002946)+[490130-490462]\ Notes:                                                                                                                                                                                                                                                                |
| NGO0515 | 0.4648 | -1.75  | down | 0.0261 | -4.01  | down | 0.2546 | 1.62  | up   | putative phage associated protein\<br>Context:(NC_002946)-<br>[490591-490824]\ Notes:                                                                                                                                                                                                                                                            |
| NGO0516 | 0.8638 | -1.08  | down | 0.5811 | -1.33  | down | 0.6644 | -1.14 | down | putative plasmid stable inheritance protein putative phage<br>associated protein\<br>Context:(NC_002946)-[490832-<br>491179]\ Notes:Best Blastp Hit: gb AAF41321.1 <br>(AE002443) pemK protein [Neisseria meningitidis MC58]                                                                                                                     |
| NGO0517 | 0.9058 | 1.06   | up   | 0.6175 | -1.27  | down | 0.8912 | 1.04  | up   | putative pemI-like protein (PemI); putative phage<br>associated protein\<br>Context:(NC_002946)-[491179-<br>491415]\ Notes:Best Blastp Hit: gb AAF41322.1 <br>(AE002443) pemI protein [Neisseria meningitidis MC58]                                                                                                                              |
| NGO0518 | 0.2576 | 2.45   | up   | 0.0393 | -8.66  | down | 0.9321 | -1.07 | down | putative phage associated protein\<br>Context:(NC_002946)+[491622-492161]\ Notes:                                                                                                                                                                                                                                                                |
| NGO0520 | 0.0760 | -5.73  | down | 0.0034 | -18.03 | down | 0.2427 | -1.88 | down | putative phage associated protein\<br>Context:(NC_002946)+[492680-492991]\ Notes:                                                                                                                                                                                                                                                                |
| NGO0521 | 0.4250 | -2.02  | down | 0.0006 | -41.07 | down | 0.9933 | 1.01  | up   | phage associated protein\<br>Context:(NC_002946)+[493004-<br>493153]\ Notes:Best Blastp Hit: gb AAF41392.1 <br>(AE002449) hypothetical protein [Neisseria meningitidis<br>MC58]                                                                                                                                                                  |

|         |        |        |      |        |        |      |        |       |      |                                                                                                                                                                                                                                                                                                                  |
|---------|--------|--------|------|--------|--------|------|--------|-------|------|------------------------------------------------------------------------------------------------------------------------------------------------------------------------------------------------------------------------------------------------------------------------------------------------------------------|
| NGO0522 | 0.0055 | -21.57 | down | 0.0440 | -32.67 | down | 0.5590 | 1.38  | up   | putative tail length tape measure protein; putative phage associated protein\ Context:(NC_002946)+[493183-496230]\ Notes:Best Blastp Hit: gi 9634160 tail length tape measure protein [Bacteriophage HK97] >gi 6901589 gb AAF31092.1 AF069529_5 (AF069529) tail length tape measure protein [Bacteriophage HK97] |
| NGO0523 | 0.6458 | -1.28  | down | 0.4541 | 1.42   | up   | 0.4291 | -1.40 | down | putative phage associated protein\ Context:(NC_002946)-[496290-496769]\ Notes:Best Blastp Hit: pir H81143 hypothetical protein NMB0899 [imported] - Neisseria meningitidis (group B strain MD58) >gi 7226136 gb AAF41307.1  (AE002442) hypothetical protein [Neisseria meningitidis MC58]                        |
| NGO0524 | 0.8047 | -1.21  | down | 0.7152 | 1.17   | up   | 0.9619 | 1.01  | up   | putative integrase\ Context:(NC_002946)-[497111-498100]\ Notes:Best Blastp Hit: gb AAF68420.1 AF237934_1 (AF237934) putative integrase/recombinase [Pasteurella multocida] COG0582 Integrase                                                                                                                     |
| NGO0525 | 0.4245 | 3.58   | up   | 0.8957 | 1.18   | up   | 0.2665 | 3.72  | up   | hypothetical protein\ Context:(NC_002946)-[498360-498548]\ Notes:Best Blastp Hit: emb CAB84662.1  (AL162755) hypothetical protein NMA1423 [Neisseria meningitidis]                                                                                                                                               |
| NGO0526 | 0.3045 | -1.81  | down | 0.1018 | -2.21  | down | 0.0403 | -2.15 | down | phosphoribosylaminoimidazole synthetase\ Context:(NC_002946)+[498789-499823]\ Notes:catalyzes the formation of 1-(5-phosphoribosyl)-5-aminoimidazole from 2-(formamido)-N1-(5-phosphoribosyl)acetamidine and ATP in purine biosynthesis                                                                          |
| NGO0527 | 0.0165 | -14.91 | down | 0.5816 | -2.21  | down | 0.7092 | -1.29 | down | hypothetical protein\ Context:(NC_002946)+[500439-500957]\ Notes:Best Blastp Hit: pir D81804 hypothetical protein NMA1789 [imported] - Neisseria meningitidis (group A strain Z2491) >gi 7380430 emb CAB85016.1  (AL162757) hypothetical protein [Neisseria meningitidis]                                        |



|         |        |       |      |        |        |      |        |       |      |                                                                                                                                                                                                                                                                                                                                                                                                                                 |
|---------|--------|-------|------|--------|--------|------|--------|-------|------|---------------------------------------------------------------------------------------------------------------------------------------------------------------------------------------------------------------------------------------------------------------------------------------------------------------------------------------------------------------------------------------------------------------------------------|
| NGO0529 | 0.2403 | -2.26 | down | 0.0076 | -9.10  | down | 0.0872 | -2.18 | down | putative high-affinity choline transport protein\<br>Context:(NC_002946)+[501653-503635]\ Notes:Best Blastp<br>Hit: pir    E81839 probable transmembrane transport<br>protein NMA1483 [imported] - Neisseria meningitidis<br>(group A strain Z2491) >gi 7380131 emb CAB84716.1 <br>(AL162756) putative transmembrane transport protein<br>[Neisseria meningitidis] COG1292 Choline-glycine betaine<br>transporter               |
| NGO0530 | 0.3637 | 1.83  | up   | 0.2368 | 1.94   | up   | 0.2508 | -1.59 | down | acyl-CoA synthetase\<br>Context:(NC_002946)-[503725-<br>505278]\ Notes:activates fatty acids by binding to<br>coenzyme A                                                                                                                                                                                                                                                                                                        |
| NGO0531 | 0.7611 | -1.48 | down | 0.0780 | -4.71  | down | 0.7142 | -1.54 | down | hypothetical protein\<br>Context:(NC_002946)+[505291-<br>505446]\ Notes:Best Blastp Hit: pir    T30159 hypothetical<br>protein C37A2.7 - Caenorhabditis elegans<br>>gi 1943794 gb AAB52450.1  (U97194) strong similarity<br>to 60S acidic ribosomal protein P2 [Caenorhabditis elegans]                                                                                                                                         |
| NGO0532 | 0.1212 | 5.67  | up   | 0.3045 | 1.76   | up   | 0.2908 | 1.77  | up   | hypothetical protein\<br>Context:(NC_002946)-[505529-<br>506722]\ Notes:Best Blastp Hit: emb CAB84713.1 <br>(AL162756) putative periplasmic protein [Neisseria<br>meningitidis]                                                                                                                                                                                                                                                 |
| NGO0533 | 0.9854 | -1.02 | down | 0.0478 | -7.21  | down | 0.6229 | -1.26 | down | hypothetical protein\<br>Context:(NC_002946)-[506719-<br>507702]\ Notes:Best Blastp Hit: pir    A81839 probable<br>periplasmic protein NMA1479 [imported] - Neisseria<br>meningitidis (group A strain Z2491)<br>>gi 7380127 emb CAB84712.1  (AL162756) putative<br>periplasmic protein [Neisseria meningitidis]                                                                                                                 |
| NGO0534 | 0.7457 | -1.28 | down | 0.0036 | -13.40 | down | 0.3016 | 1.78  | up   | putative alginate O-acetylation - like protein\<br>Context:(NC_002946)-[507713-509149]\ Notes:Best Blastp<br>Hit: pir    C81103 alginate O-acetylation protein AlgI;<br>probable NMB1273 [imported] - Neisseria meningitidis<br>(group B strain MD58) >gi 7226512 gb AAF41650.1 <br>(AE002475) alginate O-acetylation protein AlgI; putative<br>[Neisseria meningitidis MC58] COG1696 Predicted<br>membrane protein involved in |

|         |        |       |      |        |       |      |        |       |      |                                                                                                                                                                                                                                                                                                                                                                                                                            |
|---------|--------|-------|------|--------|-------|------|--------|-------|------|----------------------------------------------------------------------------------------------------------------------------------------------------------------------------------------------------------------------------------------------------------------------------------------------------------------------------------------------------------------------------------------------------------------------------|
| NGO0537 | 0.2058 | -2.30 | down | 0.1393 | -2.32 | down | 0.7901 | 1.08  | up   | hypothetical protein\ Context:(NC_002946)+[510723-511097]\ Notes:Best Blastp Hit: emb CAB84710.1  (AL162756) putative mercuric ion binding protein [Neisseria meningitidis] COG2217 Cation transport ATPases                                                                                                                                                                                                               |
| NGO0539 | 0.4877 | 1.46  | up   | 0.9080 | 1.05  | up   | 0.7559 | 1.10  | up   | hypothetical protein\ Context:(NC_002946)+[512905-514002]\ Notes:Best Blastp Hit: pir   G81102 hypothetical protein NMB1269 [imported] - Neisseria meningitidis (group B strain MD58) >gi 7226508 gb AAF41646.1  (AE002475) hypothetical protein [Neisseria meningitidis MC58]                                                                                                                                             |
| NGO0541 | 0.1339 | 2.72  | up   | 0.1440 | 2.91  | up   | 0.5950 | -1.26 | down | putative low-molecular weight phosphotyrosine protein phosphatase\ Context:(NC_002946)+[515356-515811]\ Notes:Best Blastp Hit: pir   E81102 low molecular weight protein tyrosine-phosphatase NMB1267 [imported] - Neisseria meningitidis (group B strain MD58) >gi 7226506 gb AAF41644.1  (AE002475) low molecular weight protein tyrosine-phosphatase [Neisseria meningitidis MC58] COG0394 protein-tyrosine-phosphatase |
| NGO0542 | 0.1394 | 2.13  | up   | 0.3311 | -1.60 | down | 0.6754 | -1.12 | down | hypothetical protein\ Context:(NC_002946)+[515888-516364]\ Notes:Best Blastp Hit: pir   B81838 probable cation uptake regulator NMA1471 [imported] - Neisseria meningitidis (group A strain Z2491) >gi 7380120 emb CAB84705.1  (AL162756) putative cation uptake regulator [Neisseria meningitidis] COG0735 Ferric uptake regulation protein                                                                               |
| NGO0543 | 0.3543 | 1.55  | up   | 0.0430 | 2.12  | up   | 0.7818 | 1.09  | up   | hypothetical protein\ Context:(NC_002946)+[516352-517278]\ Notes:Best Blastp Hit: emb CAB84704.1  (AL162756) hypothetical protein NMA1470 [Neisseria meningitidis] COG0523 Putative GTPases (G3E family)                                                                                                                                                                                                                   |
| NGO0544 | 0.0267 | 3.42  | up   | 0.1634 | 1.65  | up   | 0.9863 | 1.01  | up   | putative peptidyl-prolyl cis-trans isomerase A\ Context:(NC_002946)+[517343-517900]\ Notes:Best Blastp Hit: pir   H81837 probable peptidylprolyl isomerase (EC 5.2.1.8) A NMA1469 [imported] - Neisseria meningitidis (group A strain Z2491) >gi 7380118 emb CAB84703.1  (AL162756) putative peptidyl-prolyl cis-trans isomerase A [Neisseria meningitidis] COG0652 Peptidyl-prolyl cis-trans isomerase                    |

|         |        |       |      |        |       |      |        |       |      |                                                                                                                                                                                                                                                                                                                                                        |
|---------|--------|-------|------|--------|-------|------|--------|-------|------|--------------------------------------------------------------------------------------------------------------------------------------------------------------------------------------------------------------------------------------------------------------------------------------------------------------------------------------------------------|
| NGO0545 | 0.2804 | -2.39 | down | 0.0177 | -4.95 | down | 0.4993 | -2.04 | down | putative type III restriction-modification system methyltransferase\ Context:(NC_002946)+[518016-520079]\ Notes:Best Blastp Hit: possibly phase variable - 13 tandem repeats of CCAAC in the coding sequence (ON) COG2189 Adenine specific DNA methylase Mod                                                                                           |
| NGO0546 | 0.2848 | 3.87  | up   | 0.5169 | -2.09 | down | 0.0650 | -4.63 | down | putative type III restriction-modification system endonuclease protein\ Context:(NC_002946)+[520169-523108]\ Notes:Best Blastp Hit: gb AAF41638.1  (AE002474) type III restriction-modification system EcoPI enzyme; subunit res [Neisseria meningitidis MC58]                                                                                         |
| NGO0547 | 0.7788 | -1.14 | down | 0.5025 | 1.43  | up   | 0.7991 | 1.07  | up   | hypothetical protein\ Context:(NC_002946)-[523202-524161]\ Notes:Best Blastp Hit: pir   F81129 conserved hypothetical protein NMB1023 [imported] - Neisseria meningitidis (group B strain MD58) >gi 7226263 gb AAF41423.1  (AE002453) conserved hypothetical protein [Neisseria meningitidis MC58] COG0037 Predicted ATPases of the PP-loop superamily |
| NGO0548 | 0.9382 | -1.04 | down | 0.3985 | -1.56 | down | 0.4490 | -1.32 | down | hypothetical protein\ Context:(NC_002946)-[524253-525119]\ Notes:Best Blastp Hit: pir   G81129 conserved hypothetical protein NMB1024 [imported] - Neisseria meningitidis (group B strain MD58) >gi 7226264 gb AAF41424.1  (AE002453) conserved hypothetical protein [Neisseria meningitidis MC58] COG0354 Predicted aminomethyltransferase related to |
| NGO0549 | 0.2618 | 1.71  | up   | 0.5049 | -1.58 | down | 0.9344 | -1.02 | down | hypothetical protein\ Context:(NC_002946)-[525151-525513]\ Notes:Best Blastp Hit: gb AAF41425.1  (AE002453) conserved hypothetical protein [Neisseria meningitidis MC58] COG0251 Putative translation initiation inhibitor                                                                                                                             |
| NGO0550 | 0.8195 | 1.12  | up   | 0.7558 | 1.15  | up   | 0.8569 | 1.05  | up   | hypothetical protein\ Context:(NC_002946)+[525588-526067]\ Notes:Best Blastp Hit: pir   B81837 hypothetical protein NMA1462 [imported] - Neisseria meningitidis (group A strain Z2491) >gi 7380112 emb CAB84696.1  (AL162756) hypothetical protein NMA1462 [Neisseria meningitidis]                                                                    |

|         |        |       |      |        |       |      |        |       |      |                                                                                                                                                                                                                                                                                                                         |
|---------|--------|-------|------|--------|-------|------|--------|-------|------|-------------------------------------------------------------------------------------------------------------------------------------------------------------------------------------------------------------------------------------------------------------------------------------------------------------------------|
| NGO0551 | 0.5770 | 1.40  | up   | 0.4653 | -1.36 | down | 0.9310 | 1.02  | up   | putative dnaJ-family protein\<br>Context:(NC_002946)+[526089-526781]\ Notes:Best Blastp<br>Hit: emb  CAB84695.1  (AL162756) putative dnaJ-family<br>protein [Neisseria meningitidis] COG0484 Molecular<br>chaperones; DnaJ family (contain                                                                              |
| NGO0552 | 0.5637 | -1.54 | down | 0.6453 | -1.35 | down | 0.1456 | -2.45 | down | hypothetical protein\<br>Context:(NC_002946)+[526785-<br>527660]\ Notes:Best Blastp Hit: pir   B81130 conserved<br>hypothetical protein NMB1028 [imported] - Neisseria<br>meningitidis (group B strain MD58)<br>>gi  7226267  gb AAF41427.1  (AE002453) conserved<br>hypothetical protein [Neisseria meningitidis MC58] |
| NGO0553 | 0.0516 | 2.57  | up   | 0.1926 | 2.19  | up   | 0.0072 | 3.30  | up   | putative TonB-dependent receptor\<br>Context:(NC_002946)+[527868-531488]\ Notes:Best Blastp<br>Hit: gb AAG08282.1 AE004902_10 (AE004902)<br>hypothetical protein [Pseudomonas aeruginosa] COG1629<br>Outer membrane receptor proteins; mostly                                                                           |
| NGO0554 | 0.0003 | 64.24 | up   | 0.0008 | 52.81 | up   | 0.0002 | 18.19 | up   | hypothetical protein\<br>Context:(NC_002946)+[531770-<br>532720]\ Notes:Best Blastp Hit: sp Q03155 AIDA_ECOLI<br>adhesin Aida-i precursor >gi  281809  pir   S28634 adhesin<br>AIDA-I precursor - Escherichia coli plasmid pIB6<br>>gi 42255 emb CAA46156.1  (X65022) AIDA-I [Escherichia<br>coli]                      |
| NGO0555 | 0.0004 | 68.62 | up   | 0.2234 | 6.03  | up   | 0.0054 | 18.38 | up   | hypothetical protein\<br>Context:(NC_002946)+[532940-<br>534433]\ Notes:Best Blastp Hit: gb AAF40758.1 <br>(AE002388) conserved hypothetical protein [Neisseria<br>meningitidis MC58]                                                                                                                                   |
| NGO0556 | 0.1712 | -2.05 | down | 0.5037 | -1.26 | down | 0.4404 | -1.34 | down | aspartate ammonia-lyase\<br>Context:(NC_002946)-[534501-<br>535898]\ Notes:catalyzes the formation of fumarate from<br>aspartate                                                                                                                                                                                        |
| NGO0557 | 0.2753 | -1.89 | down | 0.3143 | -1.48 | down | 0.6249 | -1.20 | down | hypothetical protein\<br>Context:(NC_002946)-[535924-<br>536112]\ Notes:                                                                                                                                                                                                                                                |
| NGO0558 | 0.2942 | -1.85 | down | 0.9232 | -1.05 | down | 0.3609 | -1.47 | down | hypothetical protein\<br>Context:(NC_002946)-[536176-<br>536736]\ Notes:Best Blastp Hit: pir   D81130 conserved<br>hypothetical protein NMB1030 [imported] - Neisseria<br>meningitidis (group B strain MD58)<br>>gi  7226269  gb AAF41429.1  (AE002453) conserved<br>hypothetical protein [Neisseria meningitidis MC58] |
| NGO0561 | 0.0480 | 4.31  | up   | 0.0557 | 3.39  | up   | 0.0530 | 1.80  | up   | hypothetical protein\<br>Context:(NC_002946)+[540134-<br>541684]\ Notes:Best Blastp Hit: gb AAF41720.1 <br>(AE002483) hypothetical protein [Neisseria meningitidis<br>MC58]                                                                                                                                             |

|         |        |      |    |        |       |      |        |       |      |                                                                                                                                                                                                                                                                                                           |
|---------|--------|------|----|--------|-------|------|--------|-------|------|-----------------------------------------------------------------------------------------------------------------------------------------------------------------------------------------------------------------------------------------------------------------------------------------------------------|
| NGO0562 | 0.2075 | 2.15 | up | 0.1381 | 1.70  | up   | 0.1705 | 1.80  | up   | putative dihydrolipoamide dehydrogenase\<br>Context:(NC_002946)-[542108-543892]\ Notes:Best Blastp Hit: gb AAF41719.1  (AE002482) pyruvate dehydrogenase; E3 component; lipoamide dehydrogenase [Neisseria meningitidis MC58] COG1249 Dihydrolipoamide dehydrogenase/glutathione                          |
| NGO0563 | 0.1371 | 2.69 | up | 0.0136 | 2.81  | up   | 0.0264 | 2.81  | up   | hypothetical protein\<br>Context:(NC_002946)-[543910-544200]\ Notes:Best Blastp Hit: pir   G81094 hypothetical protein NMB1343 [imported] - Neisseria meningitidis (group B strain MD58) >gi 7226587 gb AAF41718.1  (AE002482) hypothetical protein [Neisseria meningitidis MC58]                         |
| NGO0564 | 0.1871 | 2.65 | up | 0.1063 | 5.20  | up   | 0.1423 | 2.06  | up   | dihydrolipoamide acetyltransferase\<br>Context:(NC_002946)-[544445-546034]\ Notes:Catalyzes the transfer of acetyl from acetyldihydrolipoamide to coenzyme A to form acetyl CoA                                                                                                                           |
| NGO0565 | 0.2612 | 2.46 | up | 0.0435 | 2.11  | up   | 0.0556 | 2.76  | up   | pyruvate dehydrogenase subunit E1\<br>Context:(NC_002946)-[546184-548847]\ Notes:E1 component; part of pyruvate dehydrogenase; forms a complex with DlaT and LpdC                                                                                                                                         |
| NGO0566 | 0.0907 | 2.25 | up | 0.1030 | 2.14  | up   | 0.2983 | 1.35  | up   | prolyl-tRNA synthetase\<br>Context:(NC_002946)+[549544-551256]\ Notes:catalyzes the formation of prolyl-tRNA(Pro) from proline and tRNA(Pro)                                                                                                                                                              |
| NGO0567 | 0.1326 | 2.95 | up | 0.0999 | 2.97  | up   | 0.9052 | -1.06 | down | putative hydrolase\<br>Context:(NC_002946)+[551319-551975]\ Notes:Best Blastp Hit: pir   B81094 isomerase; probable NMB1338 [imported] - Neisseria meningitidis (group B strain MD58) >gi 7226582 gb AAF41713.1  (AE002482) isomerase; putative [Neisseria meningitidis MC58] COG0179 2-keto-4-pentenoate |
| NGO0568 | 0.3792 | 1.99 | up | 0.1227 | -2.95 | down | 0.2222 | -1.78 | down | Holliday junction resolvase-like protein\<br>Context:(NC_002946)-[551985-552440]\ Notes:similar to RuvC resolvase with substantial differences; NMR structural information suggests this protein is monomeric; unknown cellular function                                                                  |
| NGO0569 | 0.4235 | 1.68 | up | 0.7050 | 1.25  | up   | 0.8963 | -1.06 | down | hypothetical protein\<br>Context:(NC_002946)-[552433-552981]\ Notes:Best Blastp Hit: gb AAF41711.1  (AE002482) conserved hypothetical protein [Neisseria meningitidis MC58] COG1678 Uncharacterized ACR                                                                                                   |

|         |        |       |      |        |       |      |        |       |      |                                                                                                                                                                                                                                                                                                                                                                                     |
|---------|--------|-------|------|--------|-------|------|--------|-------|------|-------------------------------------------------------------------------------------------------------------------------------------------------------------------------------------------------------------------------------------------------------------------------------------------------------------------------------------------------------------------------------------|
| NGO0570 | 0.1976 | 1.94  | up   | 0.3497 | 1.97  | up   | 0.3787 | 1.44  | up   | hypothetical protein\ Context:(NC_002946)-[552983-553543]\ Notes:Best Blastp Hit: emb CAB84776.1  (AL162756) hypothetical lipoprotein [Neisseria meningitidis]                                                                                                                                                                                                                      |
| NGO0571 | 0.9107 | -1.05 | down | 0.6887 | 1.17  | up   | 0.9078 | -1.03 | down | hypothetical protein\ Context:(NC_002946)+[553869-555665]\ Notes:Best Blastp Hit: possibly phase variable - 9A residue homopolymer repeat in the coding sequence (ON) COG0739 Membrane proteins related to                                                                                                                                                                          |
| NGO0572 | 0.0880 | 2.79  | up   | 0.1922 | 1.67  | up   | 0.9223 | 1.03  | up   | putative carboxy-terminal processing protease\ Context:(NC_002946)+[555792-557267]\ Notes:Best Blastp Hit: pir E81846 probable carboxy-terminal processing proteinase NMA1546 [imported] - Neisseria meningitidis (group A strain Z2491) >gi 7380187 emb CAB84773.1  (AL162756) putative carboxy-terminal processing protease [Neisseria meningitidis] COG0793 Periplasmic protease |
| NGO0573 | 0.0134 | 3.97  | up   | 0.1074 | 3.69  | up   | 0.0834 | 1.83  | up   | excinuclease ABC subunit B\ Context:(NC_002946)+[557597-559624]\ Notes:The UvrABC repair system catalyzes the recognition and processing of DNA lesions. The beta-hairpin of the Uvr-B subunit is inserted between the strands; where it probes for the presence of a lesion                                                                                                        |
| NGO0574 | 0.0897 | 3.33  | up   | 0.0061 | 3.64  | up   | 0.0295 | 3.45  | up   | Cah\ Context:(NC_002946)-[559802-560560]\ Notes:Best Blastp Hit: sp Q50940 CAH_NEIGO carbonic anhydrase precursor (carbonate dehydratase) >gi 1841441 emb CAA72038.1  (Y11152) carbonic anhydrase [Neisseria gonorrhoeae]                                                                                                                                                           |
| NGO0575 | 0.0761 | 3.96  | up   | 0.1904 | 6.42  | up   | 0.9739 | -1.02 | down | tRNA (guanine-N(7))-methyltransferase\ Context:(NC_002946)-[561640-562356]\ Notes:tRNA (guanine-N(7))-methyltransferase; catalyzes the formation of N(7)-methylguanine at position 46 (m7G46) in tRNA by transferring the methyl residue from S-adenosyl-L-methionine                                                                                                               |
| NGO0578 | 0.0558 | 3.36  | up   | 0.5538 | -1.48 | down | 0.2974 | 1.75  | up   | excinuclease ABC subunit C\ Context:(NC_002946)-[564000-565886]\ Notes:The UvrABC repair system catalyzes the recognition and processing of DNA lesions. UvrC both incises the 5' and 3' sides of the lesion. The N-terminal half is responsible for the 3' incision and the C-terminal half is responsible for the 5' incision                                                     |

|         |        |       |      |        |       |      |        |       |      |                                                                                                                                                                                                                                                                                                                                                      |
|---------|--------|-------|------|--------|-------|------|--------|-------|------|------------------------------------------------------------------------------------------------------------------------------------------------------------------------------------------------------------------------------------------------------------------------------------------------------------------------------------------------------|
| NGO0579 | 0.3283 | 2.12  | up   | 0.7905 | -1.13 | down | 0.9508 | -1.03 | down | putative transport ATPase\ Context:(NC_002946)-[565941-568118]\ Notes:Best Blastp Hit: pir    F81845 probable cation-transporting ATPase NMA1539 [imported] - Neisseria meningitidis (group A strain Z2491) >gi 7380180 emb CAB84766.1  (AL162756) putative cation-transporting ATPase [Neisseria meningitidis] COG2217 Cation transport ATPases     |
| NGO0580 | 0.1627 | 2.16  | up   | 0.3162 | 1.47  | up   | 0.3413 | 1.41  | up   | putative thioredoxin reductase\ Context:(NC_002946)+[568257-569207]\ Notes:Best Blastp Hit: pir    C81097 thioredoxin reductase NMB1324 [imported] - Neisseria meningitidis (group B strain MD58) >gi 7226566 gb AAF41699.1  (AE002480) thioredoxin reductase [Neisseria meningitidis MC58] COG0492 Thioredoxin reductase/alkyl                      |
| NGO0581 | 0.0482 | 2.93  | up   | 0.1864 | 1.70  | up   | 0.4145 | 1.34  | up   | 30S ribosomal protein S6\ Context:(NC_002946)+[569363-569731]\ Notes:binds cooperatively with S18 to the S15-16S complex; allowing platform assembly to continue with S11 and S21                                                                                                                                                                    |
| NGO0582 | 0.0780 | 3.14  | up   | 0.1436 | 1.75  | up   | 0.2767 | 1.54  | up   | PriB\ Context:(NC_002946)+[569732-570034]\ Notes:Best Blastp Hit: pir    A81097 primosomal replication protein n; probable NMB1322 [imported] - Neisseria meningitidis (group B strain MD58) >gi 7226564 gb AAF41697.1  (AE002480) primosomal replication protein n; putative [Neisseria meningitidis MC58]; putative primosomal replication protein |
| NGO0583 | 0.1158 | 2.79  | up   | 0.2107 | 1.65  | up   | 0.3097 | 1.51  | up   | 30S ribosomal protein S18\ Context:(NC_002946)+[570041-570271]\ Notes:binds as a heterodimer with protein S6 to the central domain of the 16S rRNA; helps stabilize the platform of the 30S subunit                                                                                                                                                  |
| NGO0584 | 0.0621 | 3.10  | up   | 0.0974 | 1.87  | up   | 0.2695 | 1.48  | up   | 50S ribosomal protein L9\ Context:(NC_002946)+[570288-570740]\ Notes:in Escherichia coli this protein is wrapped around the base of the L1 stalk                                                                                                                                                                                                     |
| NGO0585 | 0.8303 | -1.13 | down | 0.2486 | -1.94 | down | 0.8499 | 1.11  | up   | hypothetical protein\ Context:(NC_002946)-[571363-572169]\ Notes:Best Blastp Hit: emb CAB84760.1  (AL162756) conserved hypothetical integral membrane protein [Neisseria meningitidis] COG0730 Predicted permeases                                                                                                                                   |

|         |        |       |      |        |       |      |        |       |      |                                                                                                                                                                                                                                                                                                                                                                                                                                                                                                                                      |
|---------|--------|-------|------|--------|-------|------|--------|-------|------|--------------------------------------------------------------------------------------------------------------------------------------------------------------------------------------------------------------------------------------------------------------------------------------------------------------------------------------------------------------------------------------------------------------------------------------------------------------------------------------------------------------------------------------|
| NGO0586 | 0.1596 | 2.02  | up   | 0.8813 | -1.06 | down | 0.4732 | 1.20  | up   | putative phosphatidylserine synthase\<br>Context:(NC_002946)-[572170-572916]\ Notes:Best Blastp Hit: pir    E81096 CDPdiacylglycerol--serine O-phosphatidyltransferase (EC 2.7.8.8) NMA1532 [imported] - Neisseria meningitidis (group B strain MD58; group A strain Z2491) >gi 7226560 gb AAF41693.1  (AE002480) CDP-diacylglycerol--serine O-phosphatidyltransferase [Neisseria meningitidis MC58] >gi 7380173 emb CAB84759.1  (AL162756) phosphatidylserine synthase [Neisseria meningitidis] COG1183 Phosphatidylserine synthase |
| NGO0587 | 0.9314 | -1.10 | down | 0.0556 | -9.57 | down | 0.9275 | 1.04  | up   | hypothetical protein\<br>Context:(NC_002946)-[572971-573243]\ Notes:Best Blastp Hit: gb AAF41692.1  (AE002480) hypothetical protein [Neisseria meningitidis MC58]                                                                                                                                                                                                                                                                                                                                                                    |
| NGO0588 | 0.0143 | -4.05 | down | 0.6776 | 1.16  | up   | 0.0897 | -2.39 | down | hypothetical protein\<br>Context:(NC_002946)+[573500-573982]\ Notes:Best Blastp Hit: pir    E81844 hypothetical protein NMA1529 [imported] - Neisseria meningitidis (group A strain Z2491) >gi 7380171 emb CAB84757.1  (AL162756) hypothetical protein [Neisseria meningitidis]                                                                                                                                                                                                                                                      |
| NGO0589 | 0.6143 | -1.40 | down | 0.1268 | -1.81 | down | 0.6248 | 1.33  | up   | putative ABC transporter; permease protein\<br>Context:(NC_002946)-[574029-575240]\ Notes:Best Blastp Hit: pir    B81096 uracil permease NMB1315 [imported] - Neisseria meningitidis (group B strain MD58) >gi 7226557 gb AAF41690.1  (AE002480) uracil permease [Neisseria meningitidis MC58] COG2233 Xanthine/uracil permeases                                                                                                                                                                                                     |
| NGO0590 | 0.8261 | -1.10 | down | 0.4126 | 1.57  | up   | 0.1001 | 1.66  | up   | putative ftsK-like cell division/stress response protein\<br>Context:(NC_002946)+[575669-577900]\ Notes:Best Blastp Hit: pir    A81096 cell division protein FtsK NMB1314 [imported] - Neisseria meningitidis (group B strain MD58) >gi 7226556 gb AAF41689.1  (AE002480) cell division protein FtsK [Neisseria meningitidis MC58] COG1674 DNA segregation ATPase FtsK/SpoIIIE and                                                                                                                                                   |
| NGO0592 | 0.6027 | 1.35  | up   | 0.8364 | 1.08  | up   | 0.9983 | -1.00 | down | trigger factor\<br>Context:(NC_002946)+[578772-580085]\ Notes:Tig; RopA; peptidyl-prolyl cis/trans isomerase; promotes folding of newly synthesized proteins; binds ribosomal 50S subunit; forms a homodimer                                                                                                                                                                                                                                                                                                                         |



|         |        |      |    |        |       |      |        |      |    |                                                                                                                                                                                                                                                                                                                                                                                                                                                                                            |
|---------|--------|------|----|--------|-------|------|--------|------|----|--------------------------------------------------------------------------------------------------------------------------------------------------------------------------------------------------------------------------------------------------------------------------------------------------------------------------------------------------------------------------------------------------------------------------------------------------------------------------------------------|
| NGO0593 | 0.4386 | 1.52 | up | 0.8236 | -1.10 | down | 0.8491 | 1.06 | up | putative endopeptidase\ Context:(NC_002946)+[580181-580795]\ Notes:Best Blastp Hit: pir    A81844 endopeptidase (EC 3.4.21.92) NMA1525 [imported] - Neisseria meningitidis (group A strain Z2491) >gi 7380167 emb CAB84753.1  (AL162756) endopeptidase [Neisseria meningitidis] COG0740 Protease subunits of ATP-dependent                                                                                                                                                                 |
| NGO0594 | 0.6756 | 1.22 | up | 0.1991 | 1.59  | up   | 0.3929 | 1.35 | up | 4-hydroxy-3-methylbut-2-en-1-yl diphosphate synthase\ Context:(NC_002946)-[580849-582114]\ Notes:catalyzes the conversion of 2C-methyl-D-erythritol 2;4-cyclodiphosphate into 4-hydroxy-3-methyl-2-en-1-yl diphosphate; involved in isoprenoid synthesis                                                                                                                                                                                                                                   |
| NGO0595 | 0.0121 | 3.93 | up | 0.0527 | 2.51  | up   | 0.1611 | 1.56 | up | hypothetical protein\ Context:(NC_002946)-[582130-582891]\ Notes:Best Blastp Hit: gb  AAF41684.1  (AE002479) fimbrial biogenesis and twitching motility protein; putative [Neisseria meningitidis MC58]                                                                                                                                                                                                                                                                                    |
| NGO0596 | 0.2504 | 1.67 | up | 0.0373 | 2.28  | up   | 0.3098 | 1.33 | up | hypothetical protein\ Context:(NC_002946)-[582894-583988]\ Notes:Best Blastp Hit: pir    B81098 conserved hypothetical protein NMB1308 [imported] - Neisseria meningitidis (group B strain MD58) >gi 7226549 gb AAF41683.1  (AE002479) conserved hypothetical protein [Neisseria meningitidis MC58] COG0820 Predicted Fe-S-cluster redox enzyme                                                                                                                                            |
| NGO0597 | 0.3018 | 1.70 | up | 0.5830 | 1.26  | up   | 0.8449 | 1.06 | up | putative nucleoside diphosphate kinase\ Context:(NC_002946)-[584132-584443]\ Notes:Best Blastp Hit: pir    A81098 nucleoside diphosphate kinase (EC 2.7.4.6) NMA1521 [imported] - Neisseria meningitidis (group B strain MD58; group A strain Z2491) >gi 7226548 gb AAF41682.1  (AE002479) nucleoside diphosphate kinase [Neisseria meningitidis MC58] >gi 7380163 emb CAB84749.1  (AL162756) nucleoside diphosphate kinase [Neisseria meningitidis] COG0105 Nucleoside diphosphate kinase |

|         |        |        |      |        |        |      |        |       |      |                                                                                                                                                                                                                                                                                                                                                                                                                                                                                                                                                                             |
|---------|--------|--------|------|--------|--------|------|--------|-------|------|-----------------------------------------------------------------------------------------------------------------------------------------------------------------------------------------------------------------------------------------------------------------------------------------------------------------------------------------------------------------------------------------------------------------------------------------------------------------------------------------------------------------------------------------------------------------------------|
| NGO0598 | 0.3343 | 1.62   | up   | 0.6764 | -1.24  | down | 0.5022 | 1.21  | up   | hypothetical protein\ Context:(NC_002946)-[584616-585767]\ Notes:Best Blastp Hit: pir     H81097 probable nucleotide-binding protein NMA1520 [imported] - Neisseria meningitidis (group B strain MD58; group A strain Z2491) >gi 7226547 gb AAF41681.1  (AE002479) conserved hypothetical protein [Neisseria meningitidis MC58] >gi 7380162 emb CAB84748.1  (AL162756) putative nucleotide-binding protein [Neisseria meningitidis] COG1485 Predicted ATPase                                                                                                                |
| NGO0600 | 0.0024 | -16.84 | down | 0.0001 | -31.89 | down | 0.1268 | -6.75 | down | putative esterase D\ Context:(NC_002946)-[586297-587043]\ Notes:Best Blastp Hit: pir     G81097 esterase; probable NMB1305 [imported] - Neisseria meningitidis (group B strain MD58) >gi 7226546 gb AAF41680.1  (AE002479) esterase; putative [Neisseria meningitidis MC58] COG0627 Predicted esterase                                                                                                                                                                                                                                                                      |
| NGO0602 | 0.3168 | -3.09  | down | 0.0069 | -8.93  | down | 0.4126 | -1.57 | down | MerR family transcriptional regulator\ Context:(NC_002946)+[588393-588800]\ Notes:Best Blastp Hit: pir     E81097 transcription regulator; MerR family NMB1303 [imported] - Neisseria meningitidis (group B strain MD58; group A strain Z2491) >gi 7226544 gb AAF41678.1  (AE002479) transcriptional regulator; MerR family [Neisseria meningitidis MC58] >gi 7380159 emb CAB84745.1  (AL162756) putative transcriptional regulator [Neisseria meningitidis] COG0789 Predicted transcriptional regulators                                                                   |
| NGO0603 | 0.4820 | 1.42   | up   | 0.3169 | 1.55   | up   | 0.7958 | 1.11  | up   | IhfB\ Context:(NC_002946)-[588996-589292]\ Notes:Best Blastp Hit: pir     H81099 integration host factor; beta chain NMB1302 [imported] - Neisseria meningitidis (group B strain MD58; group A strain Z2491) >gi 7226542 gb AAF41677.1  (AE002478) integration host factor; beta subunit [Neisseria meningitidis MC58] >gi 7380158 emb CAB84744.1  (AL162756) integration host factor beta-subunit [Neisseria meningitidis] >gi 9965584 gb AAG10095.1  (U90958) IfhA [Neisseria gonorrhoeae] COG0776 Histone-like DNA-binding protein; integration host factor beta subunit |

|         |        |       |      |        |       |      |        |       |      |                                                                                                                                                                                                                                                                                                                                                                                                                                                                      |
|---------|--------|-------|------|--------|-------|------|--------|-------|------|----------------------------------------------------------------------------------------------------------------------------------------------------------------------------------------------------------------------------------------------------------------------------------------------------------------------------------------------------------------------------------------------------------------------------------------------------------------------|
| NGO0604 | 0.0908 | 2.86  | up   | 0.2089 | 1.54  | up   | 0.2028 | 1.66  | up   | 30S ribosomal protein S1\ Context:(NC_002946)-[589321-591006]\ Notes:in Escherichia coli this protein is involved in binding to the leader sequence of mRNAs and is itself bound to the 30S subunit; autoregulates expression via a C-terminal domain; in most gram negative organisms this protein is composed of 6 repeats of the S1 domain while in gram positive there are 4 repeats; the S1 nucleic acid-binding domain is found associated with other proteins |
| NGO0605 | 0.8497 | 1.11  | up   | 0.9084 | -1.05 | down | 0.9515 | -1.02 | down | putative cytidylate kinase\ Context:(NC_002946)-[591159-591815]\ Notes:Best Blastp Hit: sp P57065 KCY_NEIMB cytidylate kinase (CK) (cytidine monophosphate kinase) (CMP KINASE) >gi 11279481 pir   F81099 cytidylate kinase NMB1300 [imported] - Neisseria meningitidis (group B strain MD58) >gi 7226540 gb AAF41675.1  (AE002478) cytidylate kinase [Neisseria meningitidis MC58] COG0283 Cytidylate kinase                                                        |
| NGO0606 | 0.0608 | -5.30 | down | 0.0670 | -4.18 | down | 0.2874 | -1.74 | down | putative sodium-dependent transport protein\ Context:(NC_002946)-[592048-593418]\ Notes:Best Blastp Hit: sp P45320 YG90_HAEIN hypothetical sodium-dependent transporter HI1690 >gi 1075054 pir   H64136 neurotransmitter transport protein homolog - Haemophilus influenzae (strain Rd KW20) >gi 1574543 gb AAC23336.1  (U32842) sodium-dependent transporter; putative [Haemophilus influenzae Rd] COG0733 Sodium-dependent transporters (SNF family)               |
| NGO0607 | 0.0159 | 7.97  | up   | 0.0320 | 7.38  | up   | 0.0540 | 4.83  | up   | hypothetical protein\ Context:(NC_002946)-[593892-594584]\ Notes:Best Blastp Hit: gb AAF41674.1  (AE002478) ribosomal small subunit pseudouridine synthase A [Neisseria meningitidis MC58] >gi 7380155 emb CAB84740.1  (AL162756) putative ribosomal small subunit pseudouridine synthase [Neisseria meningitidis] COG1187 Predicted pseudouridylate synthase family 1                                                                                               |

|         |        |       |      |        |       |      |        |       |      |                                                                                                                                                                                                                                                                                                                                                                                                                                                                                                                                |
|---------|--------|-------|------|--------|-------|------|--------|-------|------|--------------------------------------------------------------------------------------------------------------------------------------------------------------------------------------------------------------------------------------------------------------------------------------------------------------------------------------------------------------------------------------------------------------------------------------------------------------------------------------------------------------------------------|
| NGO0608 | 0.0103 | 6.32  | up   | 0.0251 | 23.31 | up   | 0.0241 | 6.80  | up   | putative murein transglycosylase / nitrite reductase transcriptional regulator\ Context:(NC_002946)-[594652-596628]\ Notes:Best Blastp Hit: pir    D81842 probable membrane bound murein transglycosylase NMA1507 [imported] - Neisseria meningitidis (group A strain Z2491) >gi 7380154 emb CAB84739.1  (AL162756) putative membrane bound murein transglycosylase [Neisseria meningitidis] COG0741 Soluble lytic murein transglycosylase and                                                                                 |
| NGO0609 | 0.6385 | -1.42 | down | 0.6023 | -1.19 | down | 0.1296 | -2.50 | down | hypothetical protein\ Context:(NC_002946)+[596807-597472]\ Notes:Best Blastp Hit: pir    C81842 hypothetical protein NMA1506 [imported] - Neisseria meningitidis (group A strain Z2491) >gi 7380153 emb CAB84738.1  (AL162756) hypothetical protein [Neisseria meningitidis] COG0500 SAM-dependent methyltransferases                                                                                                                                                                                                          |
| NGO0610 | 0.4889 | -1.36 | down | 0.7982 | -1.14 | down | 0.5130 | -1.26 | down | formamidopyrimidine-DNA glycosylase\ Context:(NC_002946)+[597525-598352]\ Notes:Best Blastp Hit: sp P55044 FPG_NEIMB formamidopyrimidine-DNA glycosylase (FapY-DNA glycosylase) >gi 11264471 pir   B81099 formamidopyrimidine-DNA glycosylase NMB1295 [imported] - Neisseria meningitidis (group B strain MD58) >gi 7226536 gb AAF41671.1  (AE002478) formamidopyrimidine-DNA glycosylase [Neisseria meningitidis MC58] COG0266 Formamidopyrimidine-DNA glycosylase                                                            |
| NGO0611 | 0.5991 | 1.52  | up   | 0.2558 | -1.96 | down | 0.3142 | -1.66 | down | 1-acyl-SN-glycerol-3-phosphate acyltransferase\ Context:(NC_002946)+[598440-599207]\ Notes:Best Blastp Hit: sp Q59601 PLSC_NEIGO 1-acyl-SN-glycerol-3-phosphate acyltransferase (1-AGP acyltransferase) (1-AGPAT) (lysophosphatidic acid acyltransferase) (LPAAT) >gi 2120869 pir   S70545 1-acylglycerol-3-phosphate O-acyltransferase (EC 2.3.1.51) - Neisseria gonorrhoeae >gi 972976 gb AAB40877.1  (U21806) 1-acyl-sn-glycerol-3-phosphate acyltransferase [Neisseria gonorrhoeae] COG0204 1-acyl-sn-glycerol-3-phosphate |

|         |        |       |      |        |       |      |        |       |      |                                                                                                                                                                                                                                                                                         |
|---------|--------|-------|------|--------|-------|------|--------|-------|------|-----------------------------------------------------------------------------------------------------------------------------------------------------------------------------------------------------------------------------------------------------------------------------------------|
| NGO0613 | 0.0034 | -8.09 | down | 0.0020 | -8.69 | down | 0.2370 | -2.14 | down | hypothetical protein\ Context:(NC_002946)-[599470-599781]\ Notes:Best Blastp Hit: pir    H81098 hypothetical protein NMB1293 [imported] - Neisseria meningitidis (group B strain MD58) >gi 7226534 gb AAF41669.1  (AE002478) hypothetical protein [Neisseria meningitidis MC58]         |
| NGO0614 | 0.2757 | 1.78  | up   | 0.0479 | 2.17  | up   | 0.2073 | 1.51  | up   | ribonucleotide-diphosphate reductase subunit alpha\ Context:(NC_002946)+[600312-602591]\ Notes:Catalyzes the rate-limiting step in dNTP synthesis                                                                                                                                       |
| NGO0615 | 0.2810 | 1.75  | up   | 0.2621 | 1.46  | up   | 0.3441 | 1.34  | up   | ribonucleotide-diphosphate reductase subunit beta\ Context:(NC_002946)+[602904-604037]\ Notes:B2 or R2 protein; type 1a enzyme; catalyzes the rate-limiting step in dNTP synthesis; converts nucleotides to deoxynucleotides; forms a homodimer and then a multimeric complex with NrdA |
| NGO0616 | 0.0075 | 8.39  | up   | 0.0268 | 6.49  | up   | 0.1045 | 2.90  | up   | hypothetical protein\ Context:(NC_002946)-[604489-604767]\ Notes:Best Blastp Hit: gb AAF41662.1  (AE002477) conserved hypothetical protein [Neisseria meningitidis MC58] >gi 7380144 emb CAB84729.1  (AL162756) hypothetical protein [Neisseria meningitidis]                           |
| NGO0617 | 0.0638 | 3.52  | up   | 0.0205 | 2.63  | up   | 0.0888 | 2.27  | up   | phosphopyruvate hydratase\ Context:(NC_002946)-[604935-606221]\ Notes:enolase; catalyzes the formation of phosphoenolpyruvate from 2-phospho-D-glycerate in glycolysis                                                                                                                  |
| NGO0618 | 0.2189 | 1.78  | up   | 0.4923 | 1.33  | up   | 0.4744 | 1.21  | up   | hypothetical protein\ Context:(NC_002946)-[606268-606708]\ Notes:Best Blastp Hit: pir    C81100 hypothetical protein NMB1284 [imported] - Neisseria meningitidis (group B strain MD58) >gi 7226524 gb AAF41660.1  (AE002477) hypothetical protein [Neisseria meningitidis MC58]         |
| NGO0619 | 0.0966 | -2.61 | down | 0.1848 | -2.03 | down | 0.1319 | -1.99 | down | 2-dehydro-3-deoxyphosphooctonate aldolase\ Context:(NC_002946)-[606723-607565]\ Notes:catalyzes the formation of 2-dehydro-3-deoxy-D-octonate 8-phosphate from phosphoenolpyruvate and D-arabinose 5-phosphate in LPS biosynthesis                                                      |

|         |        |       |      |        |       |      |        |       |      |                                                                                                                                                                                                                                                                                                                                                                                        |
|---------|--------|-------|------|--------|-------|------|--------|-------|------|----------------------------------------------------------------------------------------------------------------------------------------------------------------------------------------------------------------------------------------------------------------------------------------------------------------------------------------------------------------------------------------|
| NGO0620 | 0.7432 | 1.22  | up   | 0.9731 | -1.01 | down | 0.6967 | 1.13  | up   | aspartate alpha-decarboxylase\ Context:(NC_002946)-[607587-607970]\ Notes:Converts L-aspartate to beta-alanine and provides the major route of beta-alanine production in bacteria. Beta-alanine is essential for the biosynthesis of pantothenate (vitamin B5)                                                                                                                        |
| NGO0621 | 0.0974 | 2.51  | up   | 0.8396 | -1.19 | down | 0.7021 | 1.44  | up   | hypothetical protein\ Context:(NC_002946)-[608132-608434]\ Notes:                                                                                                                                                                                                                                                                                                                      |
| NGO0622 | 0.6930 | -1.44 | down | 0.9419 | 1.11  | up   | 0.2554 | 4.04  | up   | hypothetical protein\ Context:(NC_002946)-[608468-608587]\ Notes:                                                                                                                                                                                                                                                                                                                      |
| NGO0623 | 0.0102 | 5.58  | up   | 0.4581 | 2.11  | up   | 0.8057 | 1.21  | up   | putative transcription-repair coupling factor\ Context:(NC_002946)-[608660-612364]\ Notes:Best Blastp Hit: pir   A81102 transcription-repair coupling factor NMB1281 [imported] - Neisseria meningitidis (group B strain MD58) >gi 7226520 gb AAF41657.1  (AE002476) transcription-repair coupling factor [Neisseria meningitidis MC58] COG1197 Transcription-repair coupling factor - |
| NGO0624 | 0.8225 | 1.11  | up   | 0.9308 | 1.06  | up   | 0.5858 | 1.18  | up   | putative oxidoreductase\ Context:(NC_002946)+[612423-613976]\ Notes:Best Blastp Hit: emb CAB84723.1  (AL162756) putative oxidoreductase [Neisseria meningitidis]                                                                                                                                                                                                                       |
| NGO0625 | 0.2504 | 1.82  | up   | 0.0904 | 5.01  | up   | 0.0780 | 3.43  | up   | hypothetical protein\ Context:(NC_002946)+[613967-614215]\ Notes:Best Blastp Hit: emb CAB84722.1  (AL162756) hypothetical protein NMA1489 [Neisseria meningitidis]                                                                                                                                                                                                                     |
| NGO0626 | 0.9518 | -1.04 | down | 0.3248 | 2.15  | up   | 0.5869 | -1.30 | down | putative murein hydrolase\ Context:(NC_002946)+[614124-615215]\ Notes:Best Blastp Hit: pir   G81101 membrane-bound lytic murein transglycosylase B; probable NMB1279 [imported] - Neisseria meningitidis (group B strain MD58) >gi 7226518 gb AAF41655.1  (AE002476) membrane-bound lytic murein transglycosylase B; putative [Neisseria meningitidis MC58]                            |
| NGO0627 | 0.2592 | -1.83 | down | 0.7124 | 1.28  | up   | 0.4161 | -1.64 | down | Gcr\ Context:(NC_002946)-[615338-617344]\ Notes:Best Blastp Hit: pir   F81101 site-specific recombinase NMB1278 [imported] - Neisseria meningitidis (group B strain MD58) >gi 7226517 gb AAF41654.1  (AE002476) site-specific recombinase [Neisseria meningitidis MC58]; putative site-specific recombinase                                                                            |

|         |        |       |      |        |        |      |        |       |      |                                                                                                                                                                                                                                                                                                                                                                                                                     |
|---------|--------|-------|------|--------|--------|------|--------|-------|------|---------------------------------------------------------------------------------------------------------------------------------------------------------------------------------------------------------------------------------------------------------------------------------------------------------------------------------------------------------------------------------------------------------------------|
| NGO0629 | 0.0753 | 2.57  | up   | 0.0380 | 6.43   | up   | 0.0627 | 2.26  | up   | DNA gyrase subunit A\ Context:(NC_002946)-[618439-621189]\ Notes:Best Blastp Hit: sp P48371 GYRA_NEIGO DNA gyrase subunit A >gi 2120873 pir   S60779 DNA gyrase chain A - Neisseria gonorrhoeae >gi 529408 gb AAA82128.1  (U08817) DNA gyrase subunit A [Neisseria gonorrhoeae] COG0188 DNA gyrase (topoisomerase II) A subunit                                                                                     |
| NGO0630 | 0.8980 | -1.11 | down | 0.3986 | -1.67  | down | 0.7267 | 1.22  | up   | putative chaperone protein HscB\ Context:(NC_002946)-[621287-621640]\ Notes:Best Blastp Hit: gb AAF62332.1  (AE002486) chaperone protein HscB [Neisseria meningitidis MC58] COG1076 DnaJ-domain-containing proteins 1                                                                                                                                                                                               |
| NGO0631 | 0.4427 | -1.72 | down | 0.0064 | -37.39 | down | 0.4707 | -2.43 | down | hypothetical protein\ Context:(NC_002946)+[621689-621838]\ Notes:                                                                                                                                                                                                                                                                                                                                                   |
| NGO0632 | 0.2007 | 2.11  | up   | 0.4108 | 1.65   | up   | 0.1439 | 1.92  | up   | hypothetical protein\ Context:(NC_002946)-[622050-622370]\ Notes:Best Blastp Hit: pir   H81089 HesB/YadR/YfhF family protein NMB1381 [imported] - Neisseria meningitidis (group B strain MD58) >gi 7226622 gb AAF41749.1  (AE002486) HesB/YadR/YfhF family protein [Neisseria meningitidis MC58] COG0316 Uncharacterized ACR; HesB/YadR/YfhF family                                                                 |
| NGO0633 | 0.6662 | 1.23  | up   | 0.0874 | 1.83   | up   | 0.1770 | 1.72  | up   | scaffold protein\ Context:(NC_002946)-[622457-622843]\ Notes:Best Blastp Hit: pir   G81852 NifU-like protein NMA1596 [imported] - Neisseria meningitidis (group A strain Z2491) >gi 7380237 emb CAB84823.1  (AL162756) NifU-like protein [Neisseria meningitidis] COG0822 NifU homologs involved in Fe-S cluster                                                                                                    |
| NGO0635 | 0.0443 | 3.66  | up   | 0.0198 | 2.96   | up   | 0.0076 | 3.31  | up   | hypothetical protein\ Context:(NC_002946)-[623656-623946]\ Notes:Best Blastp Hit: pir   I50969 MHC class II beta chain - Melanochromis auratus (fragment) >gi 2147702 pir   I50985 MHC class II beta chain - Melanochromis auratus (fragment) >gi 308982 gb AAA49352.1  (L17439) Mhc class II beta chain [Melanochromis auratus] >gi 309016 gb AAA49368.1  (L17463) MHC class II beta chain [Melanochromis auratus] |

|         |        |       |      |        |        |      |        |       |      |                                                                                                                                                                                                                                                                                                                                                                                                                                                                                                                                                                     |
|---------|--------|-------|------|--------|--------|------|--------|-------|------|---------------------------------------------------------------------------------------------------------------------------------------------------------------------------------------------------------------------------------------------------------------------------------------------------------------------------------------------------------------------------------------------------------------------------------------------------------------------------------------------------------------------------------------------------------------------|
| NGO0636 | 0.0771 | 2.81  | up   | 0.0207 | 3.17   | up   | 0.0369 | 2.16  | up   | putative NifS-like aminotransferase\ Context:(NC_002946)-[623952-625166]\ Notes:Best Blastp Hit: pir     E81852 NifS-like aminotranfserase NMA1594 [imported] - Neisseria meningitidis (group A strain Z2491)<br>>gi 7380235 emb CAB84821.1  (AL162756) NifS-like aminotranfserase [Neisseria meningitidis] COG1104 Cysteine sulfinatase/cysteine                                                                                                                                                                                                                   |
| NGO0637 | 0.1273 | 2.35  | up   | 0.0660 | 2.00   | up   | 0.1235 | 1.79  | up   | hypothetical protein\ Context:(NC_002946)-[625195-625641]\ Notes:Best Blastp Hit: sp Q51134 YF93_NEIMA hypothetical protein NMA1593/NMB1378 precursor<br>>gi 11278638 pir    D81852 conserved hypothetical DNA-binding protein NMA1593 [imported] - Neisseria meningitidis (group A strain Z2491)<br>>gi 7380234 emb CAB84820.1  (AL162756) conserved hypothetical DNA-binding protein [Neisseria meningitidis]<br>>gi 7413461 gb AAF62328.1  (AE002486) conserved hypothetical protein [Neisseria meningitidis MC58] COG1959 Uncharacterized BCR; YjeB/RRF2 family |
| NGO0638 | 0.0900 | -9.30 | down | 0.0138 | -27.09 | down | 0.2545 | -3.00 | down | hypothetical protein\ Context:(NC_002946)+[625640-625870]\ Notes:                                                                                                                                                                                                                                                                                                                                                                                                                                                                                                   |
| NGO0639 | 0.0102 | 4.89  | up   | 0.0196 | 2.91   | up   | 0.0380 | 2.15  | up   | putative L-lactate dehydrogenase\ Context:(NC_002946)+[625991-627163]\ Notes:Best Blastp Hit: pir     C81852 L-lactate dehydrogenase (cytochrome) (EC 1.1.2.3) NMA1592 [imported] - Neisseria meningitidis (group A strain Z2491) >gi 7380233 emb CAB84819.1  (AL162756) L-lactate dehydrogenase [Neisseria meningitidis] COG1304 L-lactate dehydrogenase (FMN-dependent) and                                                                                                                                                                                       |
| NGO0640 | 0.0299 | -3.11 | down | 0.3894 | 1.87   | up   | 0.4841 | 1.34  | up   | RmsR\ Context:(NC_002946)-[627312-630086]\ Notes:Best Blastp Hit: gb AAD02478.1  (AF048762) hypothetical membrane lipoprotein [Neisseria meningitidis]; putative restriction modification system-R protein                                                                                                                                                                                                                                                                                                                                                          |



|         |        |       |      |        |       |      |        |       |      |                                                                                                                                                                                                                                                                                                                                                                                                                                                             |
|---------|--------|-------|------|--------|-------|------|--------|-------|------|-------------------------------------------------------------------------------------------------------------------------------------------------------------------------------------------------------------------------------------------------------------------------------------------------------------------------------------------------------------------------------------------------------------------------------------------------------------|
| NGO0641 | 0.0550 | 3.21  | up   | 0.0685 | 6.26  | up   | 0.1712 | 1.75  | up   | putative type III restriction/modification system modification methylase\ Context:(NC_002946)-[630076-632346]\ Notes:Best Blastp Hit: possibly phase variable - 37 tandem repeats of CGGT in the coding sequence (ON) and an 8T residue homopolymer repeat in the coding sequence (ON) COG2189 Adenine specific DNA methylase Mod                                                                                                                           |
| NGO0642 | 0.4125 | -1.54 | down | 0.5062 | -1.58 | down | 0.5590 | -1.27 | down | putative tRNA pseudouridine synthase B\ Context:(NC_002946)-[632563-633483]\ Notes:Best Blastp Hit: pir    G81851 pseudouridylylase (EC 4.2.1.70) B tRNA-specific NMA1588 [imported] - Neisseria meningitidis (group A strain Z2491) >gi 7380229 emb  CAB84815.1   (AL162756) tRNA pseudouridine synthase B [Neisseria meningitidis] COG0130 Pseudouridine synthase                                                                                         |
| NGO0643 | 0.6211 | 1.37  | up   | 0.1727 | 1.73  | up   | 0.8387 | 1.07  | up   | hypothetical protein\ Context:(NC_002946)-[633541-634086]\ Notes:Best Blastp Hit: pir    F81851 hypothetical protein NMA1587 [imported] - Neisseria meningitidis (group A strain Z2491) >gi 7380228 emb  CAB84814.1   (AL162756) hypothetical protein [Neisseria meningitidis]                                                                                                                                                                              |
| NGO0644 | 0.5322 | 1.44  | up   | 0.5054 | 1.26  | up   | 0.9650 | 1.01  | up   | ribosome-binding factor A\ Context:(NC_002946)-[634076-634447]\ Notes:associates with free 30S ribosomal subunits; essential for efficient processing of 16S rRNA; in Escherichia coli rbfA is induced by cold shock                                                                                                                                                                                                                                        |
| NGO0645 | 0.0923 | -2.61 | down | 0.1558 | -1.95 | down | 0.0595 | -1.81 | down | ATP-dependent protease ATP-binding subunit\ Context:(NC_002946)+[634630-635874]\ Notes:binds and unfolds substrates as part of the ClpXP protease                                                                                                                                                                                                                                                                                                           |
| NGO0646 | 0.0792 | -3.02 | down | 0.0890 | -2.07 | down | 0.2074 | -1.44 | down | bifunctionalN-succinyl-diaminopimelate-aminotransferase/acetylornithine transaminase protein\ Context:(NC_002946)-[635981-637174]\ Notes:DapATase; bifunctional enzyme that functions in arginine and lysine biosynthetic pathways; catalyzes the formation of N-acetyl-L-glutamate 5-semialdehyde from 2-oxoglutarate and N(2)-acetyl-L-ornithine or N-succinyl-2-L-amino-6-oxoheptanedioate from 2-oxoglutarate and N-succinyl-L-2,6-diaminoheptanedioate |

|         |        |        |      |        |        |      |        |        |      |                                                                                                                                                                                                                                                                                                                    |
|---------|--------|--------|------|--------|--------|------|--------|--------|------|--------------------------------------------------------------------------------------------------------------------------------------------------------------------------------------------------------------------------------------------------------------------------------------------------------------------|
| NGO0647 | 0.0006 | -13.09 | down | 0.0003 | -18.55 | down | 0.0017 | -14.86 | down | hypothetical protein\ Context:(NC_002946)+[637578-638078]\ Notes:Best Blastp Hit: pir    G81090 hypothetical protein NMB1370 [imported] - Neisseria meningitidis (group B strain MD58) >gi 7226616 gb AAF41744.1  (AE002485) hypothetical protein [Neisseria meningitidis MC58]                                    |
| NGO0648 | 0.6514 | 1.28   | up   | 0.7352 | -1.11  | down | 0.6751 | 1.15   | up   | hypothetical protein\ Context:(NC_002946)+[638163-638717]\ Notes:Best Blastp Hit: pir    F81090 hypothetical protein NMB1369 [imported] - Neisseria meningitidis (group B strain MD58) >gi 7226615 gb AAF41743.1  (AE002485) hypothetical protein [Neisseria meningitidis MC58]                                    |
| NGO0649 | 0.3869 | -2.12  | down | 0.3024 | -2.29  | down | 0.3599 | -1.68  | down | hypothetical protein\ Context:(NC_002946)+[638731-638931]\ Notes:                                                                                                                                                                                                                                                  |
| NGO0650 | 0.0421 | 3.71   | up   | 0.0061 | 7.45   | up   | 0.0466 | 2.24   | up   | putative ATP-dependent RNA helicase\ Context:(NC_002946)-[639282-640670]\ Notes:Best Blastp Hit: gb AAF41742.1  (AE002485) ATP-dependent RNA helicase; putative [Neisseria meningitidis MC58] COG0513 Superfamily II DNA and RNA helicases                                                                         |
| NGO0651 | 0.4316 | 2.12   | up   | 0.1954 | -3.25  | down | 0.3100 | -2.51  | down | hypothetical protein\ Context:(NC_002946)+[640881-641945]\ Notes:Best Blastp Hit: gb AAF41741.1  (AE002485) conserved hypothetical protein [Neisseria meningitidis MC58] COG1092 Predicted SAM-dependent methyltransferases                                                                                        |
| NGO0652 | 0.1872 | 2.18   | up   | 0.2214 | 1.58   | up   | 0.3211 | 1.38   | up   | putative thioredoxin I\ Context:(NC_002946)-[641997-642329]\ Notes:Best Blastp Hit: pir    E81850 thioredoxin I NMA1578 [imported] - Neisseria meningitidis (group A strain Z2491) >gi 7380219 emb CAB84805.1  (AL162756) thioredoxin I [Neisseria meningitidis] COG0526 Thioldisulfide isomerase and thioredoxins |
| NGO0653 | 0.0007 | -14.27 | down | 0.0060 | -12.21 | down | 0.6988 | 1.28   | up   | hypothetical protein\ Context:(NC_002946)+[642627-643100]\ Notes:Best Blastp Hit: pir    D81850 hypothetical protein NMA1577 [imported] - Neisseria meningitidis (group A strain Z2491) >gi 7380218 emb CAB84804.1  (AL162756) hypothetical protein [Neisseria meningitidis]                                       |

|         |        |        |      |        |        |      |        |       |      |                                                                                                                                                                                                                                                                                                                                                                                                                                                                           |
|---------|--------|--------|------|--------|--------|------|--------|-------|------|---------------------------------------------------------------------------------------------------------------------------------------------------------------------------------------------------------------------------------------------------------------------------------------------------------------------------------------------------------------------------------------------------------------------------------------------------------------------------|
| NGO0654 | 0.5503 | -1.35  | down | 0.2968 | -1.55  | down | 0.4548 | -1.27 | down | putative NH(3)-dependent NAD synthetase\<br>Context:(NC_002946)-[643171-643992]\ Notes:Best Blastp<br>Hit: pir     C81850 NAD+ synthase (glutamine-hydrolyzing)<br>(EC 6.3.5.1) NMA1576 [similarity] - Neisseria meningitidis<br>(group A strain Z2491) >gi   7380217   emb   CAB84803.1  <br>(AL162756) NH(3)-dependent NAD synthetase [Neisseria<br>meningitidis] COG0171 NAD synthase                                                                                  |
| NGO0655 | 0.0005 | -12.84 | down | 0.0002 | -57.57 | down | 0.0340 | -7.80 | down | exodeoxyribonuclease VII large subunit\<br>Context:(NC_002946)+[644189-645544]\<br>Notes:bidirectionally degrades single-stranded DNA into<br>large acid-insoluble oligonucleotides                                                                                                                                                                                                                                                                                       |
| NGO0656 | 0.0486 | -7.65  | down | 0.0075 | -14.87 | down | 0.0270 | -6.94 | down | putative membrane transporter\<br>Context:(NC_002946)+[646046-647587]\ Notes:Best Blastp<br>Hit: pir     A81850 probable integral membrane transporter<br>NMA1574 [imported] - Neisseria meningitidis (group A<br>strain Z2491) >gi   7380215   emb   CAB84801.1   (AL162756)<br>putative integral membrane transporter [Neisseria<br>meningitidis] COG0477 Permeases                                                                                                     |
| NGO0657 | 0.7812 | -1.13  | down | 0.8347 | 1.10   | up   | 0.2521 | 1.53  | up   | hypothetical protein\<br>Context:(NC_002946)-[647646-<br>648698]\ Notes:Best Blastp Hit: pir     B81092 conserved<br>hypothetical protein NMB1361 [imported] - Neisseria<br>meningitidis (group B strain MD58)<br>>gi   7226606   gb   AAF41735.1   (AE002484) conserved<br>hypothetical protein [Neisseria meningitidis MC58]<br>COG1187 Predicted pseudouridylate synthase family 1                                                                                     |
| NGO0658 | 0.0039 | -6.10  | down | 0.0023 | -6.44  | down | 0.0723 | -2.73 | down | pyridoxamine 5'-phosphate oxidase\<br>Context:(NC_002946)+[648916-649548]\ Notes:catalyzes<br>the formation of pyridoxal 5'-phosphate from pyridoxamine<br>5'-phosphate                                                                                                                                                                                                                                                                                                   |
| NGO0659 | 0.3082 | -2.04  | down | 0.1041 | -2.74  | down | 0.9019 | -1.04 | down | putative iron/sulphur-binding oxidoreductase\<br>Context:(NC_002946)-[649678-650688]\ Notes:Best Blastp<br>Hit: pir     H81091 probable CDP-6-deoxy-Delta(3;4)-<br>glucoseen reductase (EC 1.3.1.-) NMB1359 [similarity] -<br>Neisseria meningitidis (group B strain MD58)<br>>gi   7226604   gb   AAF41733.1   (AE002484) CDP-6-deoxy-<br>delta-3;4-glucoseen reductase; putative [Neisseria<br>meningitidis MC58] COG0543 2-Octaprenylphenol<br>hydroxylase and related |

|         |        |      |    |        |      |    |        |      |    |                                                                                                                                                                                                                                                                                                                                                                                                                                                                                                                                                                                  |
|---------|--------|------|----|--------|------|----|--------|------|----|----------------------------------------------------------------------------------------------------------------------------------------------------------------------------------------------------------------------------------------------------------------------------------------------------------------------------------------------------------------------------------------------------------------------------------------------------------------------------------------------------------------------------------------------------------------------------------|
| NGO0660 | 0.0789 | 2.68 | up | 0.0294 | 3.97 | up | 0.0909 | 1.82 | up | aspartyl/glutamyl-tRNA amidotransferase subunit B\<br>Context:(NC_002946)-[650780-652210]\ Notes:allows the<br>formation of correctly charged Asn-tRNA(Asn) or Gln-<br>tRNA(Gln) through the transamidation of misacylated Asp-<br>tRNA(Asn) or Glu-tRNA(Gln) in organisms which lack either<br>or both of asparaginyl-tRNA or glutaminyl-tRNA<br>synthetases; reaction takes place in the presence of<br>glutamine and ATP through an activated phospho-Asp-<br>tRNA(Asn) or phospho-Glu-tRNA                                                                                   |
| NGO0661 | 0.0051 | 5.55 | up | 0.0423 | 5.83 | up | 0.1166 | 1.77 | up | hypothetical protein\<br>Context:(NC_002946)-[652253-<br>653185]\ Notes:Best Blastp Hit: pir   F81091 conserved<br>hypothetical protein NMB1357 [imported] - Neisseria<br>meningitidis (group B strain MD58)<br>>gi 7226602 gb AAF41731.1  (AE002484) conserved<br>hypothetical protein [Neisseria meningitidis MC58]                                                                                                                                                                                                                                                            |
| NGO0662 | 0.4295 | 1.43 | up | 0.3598 | 1.42 | up | 0.2520 | 1.35 | up | putative Glu-tRNA(Gln) amidotransferase subunit\<br>Context:(NC_002946)-[653182-654627]\ Notes:Best Blastp<br>Hit: pir   C81849 Glu-tRNA(Gln) amidotransferase subunit A<br>NMA1568 [imported] - Neisseria meningitidis (group A<br>strain Z2491) >gi 7380209 emb CAB84795.1  (AL162756)<br>Glu-tRNA(Gln) amidotransferase subunit A [Neisseria<br>meningitidis] COG0154 Glu-tRNAGln amidotransferase A<br>subunit                                                                                                                                                               |
| NGO0663 | 0.8163 | 1.15 | up | 0.9758 | 1.01 | up | 0.4047 | 1.32 | up | aspartyl/glutamyl-tRNA amidotransferase subunit C\<br>Context:(NC_002946)-[654690-654980]\ Notes:allows the<br>formation of correctly charged Asn-tRNA(Asn) or Gln-<br>tRNA(Gln) through the transamidation of misacylated Asp-<br>tRNA(Asn) or Glu-tRNA(Gln) in organisms which lack either<br>or both of asparaginyl-tRNA or glutaminyl-tRNA<br>synthetases; reaction takes place in the presence of<br>glutamine and ATP through an activated phospho-Asp-<br>tRNA(Asn) or phospho-Glu-tRNA; some Mycoplasma<br>proteins contain an N-terminal fusion to an unknown<br>domain |

|         |        |       |      |        |        |      |        |       |      |                                                                                                                                                                                                                                                                                                                                                                                            |
|---------|--------|-------|------|--------|--------|------|--------|-------|------|--------------------------------------------------------------------------------------------------------------------------------------------------------------------------------------------------------------------------------------------------------------------------------------------------------------------------------------------------------------------------------------------|
| NGO0664 | 0.5687 | -1.35 | down | 0.6239 | 1.21   | up   | 0.9310 | -1.03 | down | hypothetical protein\ Context:(NC_002946)+[655130-655783]\ Notes:Best Blastp Hit: pir    E81093 conserved hypothetical protein NMB1354 [imported] - Neisseria meningitidis (group B strain MD58) >gi 7226598 gb AAF41728.1  (AE002483) conserved hypothetical protein [Neisseria meningitidis MC58] COG2095 Integral membrane proteins of the MarC                                         |
| NGO0665 | 0.1664 | 2.84  | up   | 0.3422 | 1.45   | up   | 0.8780 | 1.05  | up   | putative aldehyde dehydrogenase\ Context:(NC_002946)+[655788-657131]\ Notes:Best Blastp Hit: pir    D81093 aldehyde dehydrogenase family protein NMB1353 [imported] - Neisseria meningitidis (group B strain MD58) >gi 7226597 gb AAF41727.1  (AE002483) aldehyde dehydrogenase family protein [Neisseria meningitidis MC58] COG1012 NAD-dependent aldehyde dehydrogenases                 |
| NGO0666 | 0.5747 | 1.29  | up   | 0.8419 | -1.10  | down | 0.4020 | 1.35  | up   | hypothetical protein\ Context:(NC_002946)-[657180-657608]\ Notes:Best Blastp Hit: pir    C81093 hypothetical protein NMB1352 [imported] - Neisseria meningitidis (group B strain MD58; group A strain Z2491) >gi 7226596 gb AAF41726.1  (AE002483) hypothetical protein [Neisseria meningitidis MC58] >gi 7380205 emb CAB84791.1  (AL162756) hypothetical protein [Neisseria meningitidis] |
| NGO0667 | 0.1424 | -2.75 | down | 0.0044 | -24.83 | down | 0.8308 | 1.13  | up   | hypothetical protein\ Context:(NC_002946)-[657753-657938]\ Notes:                                                                                                                                                                                                                                                                                                                          |
| NGO0668 | 0.1105 | 2.55  | up   | 0.2110 | 2.48   | up   | 0.0592 | 2.72  | up   | putative SUN-family protein\ Context:(NC_002946)-[657954-659210]\ Notes:Best Blastp Hit: emb CAB84790.1  (AL162756) SUN-family protein [Neisseria meningitidis] COG0144 Predicted rRNA methylase                                                                                                                                                                                           |
| NGO0669 | 0.6397 | 1.23  | up   | 0.2594 | 1.50   | up   | 0.9435 | 1.02  | up   | hypothetical protein\ Context:(NC_002946)-[659246-660115]\ Notes:Best Blastp Hit: pir    D81848 hypothetical protein NMA1561 [imported] - Neisseria meningitidis (group A strain Z2491) >gi 7380202 emb CAB84788.1  (AL162756) hypothetical protein [Neisseria meningitidis]                                                                                                               |

|         |        |       |      |        |        |      |        |       |      |                                                                                                                                                                                                                                                                                                                                                            |
|---------|--------|-------|------|--------|--------|------|--------|-------|------|------------------------------------------------------------------------------------------------------------------------------------------------------------------------------------------------------------------------------------------------------------------------------------------------------------------------------------------------------------|
| NGO0670 | 0.6950 | -1.21 | down | 0.5406 | 1.25   | up   | 0.4044 | -1.65 | down | putative methylase family protein\ Context:(NC_002946)-[660156-660971]\ Notes:Best Blastp Hit: pir   G81092 RNA methylase; probable NMB1348 [imported] - Neisseria meningitidis (group B strain MD58)<br>>gi 7226592 gb AAF41722.1  (AE002483) RNA methylase; putative [Neisseria meningitidis MC58] COG0565 rRNA methylase                                |
| NGO0671 | 0.1808 | 1.88  | up   | 0.1381 | 3.09   | up   | 0.7422 | -1.16 | down | hypothetical protein\ Context:(NC_002946)+[661215-662000]\ Notes:Best Blastp Hit: pir   F81092 extragenic suppressor protein SuhB NMB1347 [imported] - Neisseria meningitidis (group B strain MD58)<br>>gi 7226591 gb AAF41721.1  (AE002483) extragenic suppressor protein SuhB [Neisseria meningitidis MC58] COG0483 Inositol phosphatase family proteins |
| NGO0672 | 0.3928 | -2.79 | down | 0.0434 | -15.69 | down | 0.5245 | -1.99 | down | hypothetical protein\ Context:(NC_002946)+[662118-662309]\ Notes:                                                                                                                                                                                                                                                                                          |
| NGO0674 | 0.5229 | 1.45  | up   | 0.1249 | 1.72   | up   | 0.5150 | 1.28  | up   | 3-isopropylmalate dehydrogenase\ Context:(NC_002946)-[662987-664057]\ Notes:catalyzes the oxidation of 3-isopropylmalate to 3-carboxy-4-methyl-2-oxopentanoate in leucine biosynthesis                                                                                                                                                                     |
| NGO0675 | 0.3824 | 1.58  | up   | 0.3655 | 1.42   | up   | 0.8412 | 1.05  | up   | putative type II restriction endonuclease NlaIV\ Context:(NC_002946)-[664091-664822]\ Notes:Best Blastp Hit: sp P50183 T2N4_NEILA type II restriction enzyme NLAIV (endonuclease NLAIV) (R.NLAIV)<br>>gi 628599 pir S43887 restriction endonuclease - Neisseria lactamica >gi 476228 gb AAA53238.1  (U06074) R.NlaIV [Neisseria lactamica]                 |
| NGO0676 | 0.2180 | 1.83  | up   | 0.2364 | 1.85   | up   | 0.4993 | 1.27  | up   | putative DNA modification methylase (N.MgoV)\ Context:(NC_002946)-[664838-666109]\ Notes:Best Blastp Hit: possibly phase variable - 9A residue homopolymer repeat in the coding sequence (ON) COG0270 Site-specific DNA methylase dcm                                                                                                                      |
| NGO0677 | 0.5080 | 1.47  | up   | 0.6599 | 1.18   | up   | 0.9703 | -1.01 | down | isopropylmalate isomerase small subunit\ Context:(NC_002946)-[666276-666917]\ Notes:catalyzes the isomerization between 2-isopropylmalate and 3-isopropylmalate in leucine biosynthesis; forms a heterodimer of LeuC/D                                                                                                                                     |

|         |        |       |      |        |       |      |        |       |      |                                                                                                                                                                                                                                                                                                                                |
|---------|--------|-------|------|--------|-------|------|--------|-------|------|--------------------------------------------------------------------------------------------------------------------------------------------------------------------------------------------------------------------------------------------------------------------------------------------------------------------------------|
| NGO0678 | 0.2952 | 1.89  | up   | 0.5702 | 1.23  | up   | 0.4461 | 1.28  | up   | hypothetical protein\ Context:(NC_002946)-[666979-667233]\ Notes:Best Blastp Hit: gb AAF41434.1  (AE002454) hypothetical protein [Neisseria meningitidis MC58] >gi 7380104 emb CAB84687.1  (AL162756) putative lipoprotein [Neisseria meningitidis]                                                                            |
| NGO0679 | 0.9044 | -1.06 | down | 0.6579 | -1.20 | down | 0.3943 | -1.29 | down | isopropylmalate isomerase large subunit\ Context:(NC_002946)-[667328-668737]\ Notes:dehydratase component; catalyzes the isomerization between 2-isopropylmalate and 3-isopropylmalate                                                                                                                                         |
| NGO0680 | 0.0177 | 3.87  | up   | 0.4711 | 1.26  | up   | 0.4124 | 1.26  | up   | hypothetical protein\ Context:(NC_002946)+[669169-670338]\ Notes:Best Blastp Hit: pir   H81835 probable glutamate--cysteine ligase (EC 6.3.2.2) NMA1449 [imported] - Neisseria meningitidis (group A strain Z2491) >gi 7380102 emb CAB84685.1  (AL162756) putative glutamate--cysteine ligase [Neisseria meningitidis]         |
| NGO0681 | 0.0995 | -3.89 | down | 0.0333 | -9.55 | down | 0.4188 | -2.71 | down | DNA repair protein RadC\ Context:(NC_002946)+[670461-671138]\ Notes:Involved in DNA double-strand break repair and recombination. Promotes the annealing of complementary single-stranded DNA and by simulation of RAD51 recombinase                                                                                           |
| NGO0682 | 0.0671 | 3.62  | up   | 0.7713 | 1.11  | up   | 0.2878 | -2.48 | down | hypothetical protein\ Context:(NC_002946)+[671211-671936]\ Notes:Best Blastp Hit: pir   B81129 conserved hypothetical protein NMB1039 [imported] - Neisseria meningitidis (group B strain MD58) >gi 7226279 gb AAF41438.1  (AE002454) conserved hypothetical protein [Neisseria meningitidis MC58] COG1636 Uncharacterized BCR |
| NGO0683 | 0.7088 | 1.21  | up   | 0.8310 | 1.08  | up   | 0.9562 | -1.02 | down | hypothetical protein\ Context:(NC_002946)+[672088-673368]\ Notes:Best Blastp Hit: pir   E81835 probable periplasmic protein NMA1446 [imported] - Neisseria meningitidis (group A strain Z2491) >gi 7380099 emb CAB84682.1  (AL162756) putative periplasmic protein [Neisseria meningitidis]                                    |

|         |        |       |      |        |       |      |        |       |      |                                                                                                                                                                                                                                                                                                                                                                                                   |
|---------|--------|-------|------|--------|-------|------|--------|-------|------|---------------------------------------------------------------------------------------------------------------------------------------------------------------------------------------------------------------------------------------------------------------------------------------------------------------------------------------------------------------------------------------------------|
| NGO0684 | 0.2102 | 2.57  | up   | 0.3024 | 1.80  | up   | 0.6837 | -1.30 | down | putative GTP binding protein\<br>Context:(NC_002946)+[673443-674552]\ Notes:Best Blastp<br>Hit: emb  CAB84681.1  (AL162756) hypothetical protein<br>NMA1445 [Neisseria meningitidis] COG1159 Predicted<br>GTPases; Era/HflX family                                                                                                                                                                |
| NGO0685 | 0.7425 | 1.33  | up   | 0.9993 | -1.00 | down | 0.2042 | 2.38  | up   | putative P-type cation-transporting ATPase\<br>Context:(NC_002946)+[674549-677005]\ Notes:Best Blastp<br>Hit: pir   C81835 probable P-type cation-transporting<br>ATPase NMA1444 [imported] - Neisseria meningitidis<br>(group A strain Z2491) >gi 7380097 emb  CAB84680.1 <br>(AL162756) putative P-type cation-transporting ATPase<br>[Neisseria meningitidis] COG2217 Cation transport ATPases |
| NGO0686 | 0.0429 | 18.03 | up   | 0.0572 | -4.52 | down | 0.9496 | 1.08  | up   | hypothetical protein\<br>Context:(NC_002946)+[677179-<br>677331]\ Notes:Best Blastp Hit: gb AAF41441.1 <br>(AE002455) hypothetical protein [Neisseria meningitidis<br>MC58]                                                                                                                                                                                                                       |
| NGO0687 | 0.6848 | -1.23 | down | 0.8391 | 1.09  | up   | 0.2607 | 2.12  | up   | putative ferredoxin-NADP reductase\<br>Context:(NC_002946)-<br>[677673-678449]\ Notes:Best Blastp Hit: gb AAF41442.1 <br>(AE002455) ferredoxin--NADP reductase [Neisseria<br>meningitidis MC58] >gi 7380095 emb  CAB84678.1 <br>(AL162756) putative ferredoxin--NADP reductase [Neisseria<br>meningitidis] COG1018 Flavodoxin reductases (ferredoxin-<br>NADPH                                    |
| NGO0688 | 0.3139 | 1.73  | up   | 0.6413 | 1.17  | up   | 0.1715 | -2.51 | down | hypothetical protein\<br>Context:(NC_002946)-[678637-<br>679431]\ Notes:Best Blastp Hit: pir   E81127 hypothetical<br>protein NMB1045 [imported] - Neisseria meningitidis<br>(group B strain MD58) >gi 7226285 gb AAF41443.1 <br>(AE002455) hypothetical protein [Neisseria meningitidis<br>MC58]                                                                                                 |
| NGO0689 | 0.9827 | -1.01 | down | 0.6346 | -1.23 | down | 0.8395 | -1.06 | down | threonine synthase\<br>Context:(NC_002946)-[679478-<br>680887]\ Notes:catalyzes the formation of L-threonine<br>from O-phospho-L-homoserine                                                                                                                                                                                                                                                       |
| NGO0690 | 0.9081 | 1.06  | up   | 0.8237 | -1.09 | down | 0.4708 | -1.23 | down | hypothetical protein\<br>Context:(NC_002946)-[680960-<br>681328]\ Notes:Best Blastp Hit: pir   F81834 probable<br>lipoprotein NMA1439 [imported] - Neisseria meningitidis<br>(group A strain Z2491) >gi 7380092 emb  CAB84675.1 <br>(AL162756) putative lipoprotein [Neisseria meningitidis]                                                                                                      |



|         |        |       |      |        |       |      |        |       |      |                                                                                                                                                                                                                                                                                                                                                                                                                 |
|---------|--------|-------|------|--------|-------|------|--------|-------|------|-----------------------------------------------------------------------------------------------------------------------------------------------------------------------------------------------------------------------------------------------------------------------------------------------------------------------------------------------------------------------------------------------------------------|
| NGO0693 | 0.1059 | -3.18 | down | 0.1732 | -2.50 | down | 0.3477 | -1.79 | down | hypothetical protein\ Context:(NC_002946)-[684226-684741]\ Notes:Best Blastp Hit: possibly phase variable - 8A residue homopolymer repeat in the coding sequence (ON)                                                                                                                                                                                                                                           |
| NGO0694 | 0.2883 | 1.87  | up   | 0.3244 | 1.45  | up   | 0.6910 | -1.13 | down | hypothetical protein\ Context:(NC_002946)-[684728-687346]\ Notes:Best Blastp Hit: sp P24328 PERT_BORPA pertactin precursor (outer membrane protein P.70) (P.95) >gi 95503 pir  S15204 pertactin - Bordetella parapertussis >gi 39762 emb CAA38419.1 (X54547) pertactin [Bordetella parapertussis]                                                                                                               |
| NGO0696 | 0.0652 | -2.79 | down | 0.0138 | -3.34 | down | 0.1245 | -2.44 | down | recombination factor protein RarA\ Context:(NC_002946)+[688651-689961]\ Notes:Best Blastp Hit: pir E81103 conserved hypothetical protein NMB1258 [imported] - Neisseria meningitidis (group B strain MD58) >gi 7226497 gb AAF41636.1 (AE002474) conserved hypothetical protein [Neisseria meningitidis MC58] COG2256 Uncharacterized ATPase related to the                                                      |
| NGO0697 | 0.0015 | 14.03 | up   | 0.3595 | 2.72  | up   | 0.6490 | 1.43  | up   | putative type I restriction enzyme\ Context:(NC_002946)+[690060-693086]\ Notes:Best Blastp Hit: gb AAG22017.1 AF288038_2 (AF288038) putative HsdR [Streptococcus thermophilus] COG0610 Restriction enzymes type I helicase subunits                                                                                                                                                                             |
| NGO0698 | 0.0017 | 22.40 | up   | 0.0500 | 8.03  | up   | 0.0455 | 9.97  | up   | hypothetical protein\ Context:(NC_002946)+[693136-693369]\ Notes:Best Blastp Hit: pir G81152 probable DNA-binding protein NMA1039 [imported] - Neisseria meningitidis (group B strain MD58; group A strain Z2491) >gi 7226065 gb AAF41242.1 (AE002436) conserved hypothetical protein [Neisseria meningitidis MC58] >gi 7379741 emb CAB84308.1 (AL162754) putative DNA-binding protein [Neisseria meningitidis] |
| NGO0699 | 0.3188 | 2.22  | up   | 0.1000 | 6.56  | up   | 0.1688 | 4.55  | up   | hypothetical protein\ Context:(NC_002946)+[693416-694618]\ Notes:Best Blastp Hit: gb AAG22014.1 AF288037_3 (AF288037) putative HsdS [Streptococcus thermophilus] COG0732 Restriction endonuclease S subunits                                                                                                                                                                                                    |

|         |        |       |      |        |        |      |        |       |      |                                                                                                                                                                                                                                                                                                                                                                                   |
|---------|--------|-------|------|--------|--------|------|--------|-------|------|-----------------------------------------------------------------------------------------------------------------------------------------------------------------------------------------------------------------------------------------------------------------------------------------------------------------------------------------------------------------------------------|
| NGO0700 | 0.0064 | 8.50  | up   | 0.0201 | 7.98   | up   | 0.1414 | 5.38  | up   | hypothetical protein\ Context:(NC_002946)+[694611-695171]\ Notes:Best Blastp Hit: pir    G69096 hypothetical protein MTH1717 - Methanobacterium thermoautotrophicum (strain Delta H) >gi 2622849 gb AAB86189.1  (AE000928) unknown [Methanobacterium thermoautotrophicum]                                                                                                         |
| NGO0701 | 0.0629 | 3.85  | up   | 0.1156 | 4.51   | up   | 0.1117 | 7.27  | up   | hypothetical protein\ Context:(NC_002946)+[695182-696024]\ Notes:                                                                                                                                                                                                                                                                                                                 |
| NGO0702 | 0.2561 | 1.77  | up   | 0.0737 | 5.31   | up   | 0.2097 | 2.76  | up   | hypothetical protein\ Context:(NC_002946)+[696091-697692]\ Notes:Best Blastp Hit: gb AAG22013.1 AF288037_2 (AF288037) putative HsdM [Streptococcus thermophilus] COG0286 Type I restriction-modification system                                                                                                                                                                   |
| NGO0703 | 0.0943 | -4.04 | down | 0.2020 | -7.58  | down | 0.8706 | -1.18 | down | hypothetical protein\ Context:(NC_002946)-[697719-697988]\ Notes:                                                                                                                                                                                                                                                                                                                 |
| NGO0704 | 0.3152 | -2.10 | down | 0.8288 | 1.21   | up   | 0.5618 | -1.39 | down | bifunctional 3;4-dihydroxy-2-butanone 4-phosphate synthase/GTP cyclohydrolase II protein\ Context:(NC_002946)-[698003-699094]\ Notes:bifunctional enzyme DHBP synthase/GTP cyclohydrolase II; functions in riboflavin synthesis; converts GTP to 2;5-diamino-6-hydroxy-4-(5-phosphoribosylamino)pyrimidine; converts ribulose 5-phosphate to 3;4-dihydroxy-2-butanone 4-phosphate |
| NGO0709 | 0.2246 | -4.43 | down | 0.0119 | -35.36 | down | 0.8970 | 1.15  | up   | hypothetical protein\ Context:(NC_002946)+[708430-708798]\ Notes:                                                                                                                                                                                                                                                                                                                 |
| NGO0710 | 0.2283 | 3.51  | up   | 0.9300 | 1.09   | up   | 0.1181 | -2.65 | down | putative adenine glycosylase\ Context:(NC_002946)-[709174-710223]\ Notes:Best Blastp Hit: gb AAF41760.1  (AE002488) A/G-specific adenine glycosylase [Neisseria meningitidis MC58] COG1194 A/G-specific DNA glycosylase                                                                                                                                                           |
| NGO0711 | 0.1019 | -5.40 | down | 0.0089 | -19.44 | down | 0.3191 | 1.54  | up   | putative alcohol dehydrogenase\ Context:(NC_002946)+[710377-711393]\ Notes:Best Blastp Hit: pir    C81088 alcohol dehydrogenase; zinc-containing NMB1395 [imported] - Neisseria meningitidis (group B strain MD58) >gi 7226634 gb AAF41759.1  (AE002488) alcohol dehydrogenase; zinc-containing [Neisseria meningitidis MC58] COG1065 Zn-dependent oxidoreductases                |
| NGO0712 | 0.7342 | 1.29  | up   | 0.7435 | -1.41  | down | 0.3812 | -2.66 | down | hypothetical protein\ Context:(NC_002946)+[711637-711822]\ Notes:                                                                                                                                                                                                                                                                                                                 |

|         |        |      |    |        |      |    |        |      |    |                                                                                                                                                                                                                                                                                                                                                                                                                                                                                          |
|---------|--------|------|----|--------|------|----|--------|------|----|------------------------------------------------------------------------------------------------------------------------------------------------------------------------------------------------------------------------------------------------------------------------------------------------------------------------------------------------------------------------------------------------------------------------------------------------------------------------------------------|
| NGO0713 | 0.0216 | 5.83 | up | 0.0098 | 3.25 | up | 0.0235 | 4.10 | up | keto-hydroxyglutarate-aldolase/keto-deoxy-phosphogluconate aldolase\ Context:(NC_002946)-[712011-712649]\ Notes:catalyzes the formation of pyruvate and glyoxylate from 4-hydroxy-2-oxoglutarate; or pyruvate and D-glyceraldehyde 3-phosphate from 2-dehydro-3-deoxy-D-glyconate 6-phosphate                                                                                                                                                                                            |
| NGO0714 | 0.0024 | 8.11 | up | 0.1443 | 2.72 | up | 0.0478 | 2.29 | up | phosphogluconate dehydratase\ Context:(NC_002946)-[712859-714694]\ Notes:catalyzes the formation of 2-dehydro-3-deoxy-6-phospho-D-gluconate from 6-phospho-D-gluconate                                                                                                                                                                                                                                                                                                                   |
| NGO0715 | 0.2672 | 1.79 | up | 0.1780 | 1.71 | up | 0.1321 | 1.65 | up | glucose-6-phosphate 1-dehydrogenase\ Context:(NC_002946)+[715214-716659]\ Notes:catalyzes the formation of D-glucono-1;5-lactone 6-phosphate from D-glucose 6-phosphate                                                                                                                                                                                                                                                                                                                  |
| NGO0716 | 0.1554 | 2.19 | up | 0.3589 | 1.44 | up | 0.1486 | 1.61 | up | hypothetical protein\ Context:(NC_002946)+[716811-717506]\ Notes:Best Blastp Hit: gb AAF41755.1 (AE002487) oxidoreductase; Sol/DevB family [Neisseria meningitidis MC58] >gi 7380250 emb CAB84836.1 (AL162756) 6-phosphogluconolactonase [Neisseria meningitidis] COG0363 Glucosamine-6-phosphate deaminase                                                                                                                                                                              |
| NGO0717 | 0.1143 | 2.24 | up | 0.2295 | 1.63 | up | 0.1788 | 1.51 | up | glucokinase\ Context:(NC_002946)+[717487-718473]\ Notes:catalyzes the conversion of ATP and D-glucose to ADP and D-glucose 6-phosphate                                                                                                                                                                                                                                                                                                                                                   |
| NGO0718 | 0.0309 | 3.76 | up | 0.0539 | 5.54 | up | 0.0337 | 2.26 | up | RpiR family transcriptional regulator\ Context:(NC_002946)+[718522-719370]\ Notes:Best Blastp Hit: pir   D81089 RpiR/YebK/YfhH family protein NMB1389 [imported] - Neisseria meningitidis (group B strain MD58; group A strain Z2491) >gi 7226627 gb AAF41753.1 (AE002487) RpiR/YebK/YfhH family protein [Neisseria meningitidis MC58] >gi 7380248 emb CAB84834.1 (AL162756) putative transcriptional regulator [Neisseria meningitidis] COG1737 Transcriptional regulators; RpiR family |

|         |        |       |      |        |       |      |        |       |      |                                                                                                                                                                                                                                                                                                                                |
|---------|--------|-------|------|--------|-------|------|--------|-------|------|--------------------------------------------------------------------------------------------------------------------------------------------------------------------------------------------------------------------------------------------------------------------------------------------------------------------------------|
| NGO0719 | 0.0845 | 3.61  | up   | 0.0375 | 2.77  | up   | 0.0821 | 3.72  | up   | glucose-6-phosphate isomerase\<br>Context:(NC_002946)+[719596-721242]\ Notes:functions in sugar metabolism in glycolysis and the Embden-Meyerhof pathways (EMP) and in gluconeogenesis; catalyzes reversible isomerization of glucose-6-phosphate to fructose-6-phosphate; member of PGI family                                |
| NGO0720 | 0.8001 | 1.25  | up   | 0.2690 | -3.18 | down | 0.0337 | 3.14  | up   | putative phage associated protein\<br>Context:(NC_002946)+[721256-721459]\ Notes:Best Blastp Hit: pir   B81089 hypothetical protein NMB1387 [imported] - Neisseria meningitidis (group B strain MD58) >gi 7226625 gb AAF41751.1  (AE002487) hypothetical protein [Neisseria meningitidis MC58]                                 |
| NGO0721 | 0.7642 | 1.16  | up   | 0.9404 | 1.06  | up   | 0.7179 | -1.17 | down | putative phage associated protein\<br>Context:(NC_002946)+[721459-722472]\ Notes:Best Blastp Hit: possibly phase variable - 8A residue homopolymer repeat in the coding sequence (ON)                                                                                                                                          |
| NGO0722 | 0.1066 | 3.51  | up   | 0.5273 | 1.92  | up   | 0.6574 | 1.51  | up   | putative phage associated protein\<br>Context:(NC_002946)+[722517-722657]\ Notes:Best Blastp Hit: emb CAB84831.1  (AL162756) hypothetical protein [Neisseria meningitidis]                                                                                                                                                     |
| NGO0723 | 0.0027 | -7.34 | down | 0.0457 | -5.39 | down | 0.1035 | -3.09 | down | putative phage associated protein\<br>Context:(NC_002946)+[722896-723144]\ Notes:Best Blastp Hit: emb CAB84476.1  (AL162755) hypothetical protein NMA1216 [Neisseria meningitidis]                                                                                                                                             |
| NGO0724 | 0.3677 | -3.92 | down | 0.8600 | -1.10 | down | 0.5811 | 1.22  | up   | putative phage associated protein\<br>Context:(NC_002946)+[723086-723208]\ Notes:Best Blastp Hit: emb CAB84476.1  (AL162755) hypothetical protein NMA1216 [Neisseria meningitidis]                                                                                                                                             |
| NGO0725 | 0.0869 | -3.78 | down | 0.7317 | -1.24 | down | 0.9857 | -1.02 | down | putative phage associated protein\<br>Context:(NC_002946)-[723158-723466]\ Notes:Best Blastp Hit: gb AAF41506.1  (AE002461) hypothetical protein [Neisseria meningitidis MC58]                                                                                                                                                 |
| NGO0727 | 0.1410 | -3.55 | down | 0.0312 | -4.35 | down | 0.8314 | -1.11 | down | putative baseplate protein; putative phage associated protein\<br>Context:(NC_002946)-[726767-727315]\ Notes:Best Blastp Hit: gi 9634072 P2 J homolog; baseplate or base of tail fibre [Enterobacteria phage 186] >gi 3522880 gb AAC34162.1  (U32222) P2 J homolog; baseplate or base of tail fibre [Enterobacteria phage 186] |

|         |        |       |      |        |       |      |        |       |      |                                                                                                                                                                                                                                                                                                                                            |
|---------|--------|-------|------|--------|-------|------|--------|-------|------|--------------------------------------------------------------------------------------------------------------------------------------------------------------------------------------------------------------------------------------------------------------------------------------------------------------------------------------------|
| NGO0728 | 0.3517 | -1.57 | down | 0.0718 | -6.14 | down | 0.7761 | 1.27  | up   | putative phage associated protein\ Context:(NC_002946)-[727336-728238]\ Notes:Best Blastp Hit: dbj BAA36244.1  (AB008550) orf17; similar to W gene of P2:baseplate [Pseudomonas aeruginosa phage phi CTX]                                                                                                                                  |
| NGO0729 | 0.3909 | -2.09 | down | 0.7836 | -1.28 | down | 0.6462 | -1.20 | down | putative phage associated protein\ Context:(NC_002946)-[728344-728556]\ Notes:Best Blastp Hit: emb CAB84478.1  (AL162755) hypothetical protein NMA1218 [Neisseria meningitidis]                                                                                                                                                            |
| NGO0731 | 0.6507 | 1.23  | up   | 0.9286 | -1.05 | down | 0.8772 | 1.06  | up   | putative phage associated protein\ Context:(NC_002946)-[729286-729570]\ Notes:Best Blastp Hit: pir B81890 hypothetical protein NMA1219 [imported] - Neisseria meningitidis (group A strain Z2491) >gi 7379908 emb CAB84479.1  (AL162755) hypothetical protein NMA1219 [Neisseria meningitidis]                                             |
| NGO0732 | 0.4898 | 1.44  | up   | 0.8125 | 1.12  | up   | 0.7777 | -1.10 | down | putative phage associated protein\ Context:(NC_002946)-[729607-729870]\ Notes:Best Blastp Hit: emb CAB84480.1  (AL162755) hypothetical protein NMA1220 [Neisseria meningitidis]                                                                                                                                                            |
| NGO0734 | 0.7605 | -1.16 | down | 0.3938 | -1.97 | down | 0.6953 | -1.25 | down | putative oxidoreductase\ Context:(NC_002946)-[731378-732157]\ Notes:Best Blastp Hit: gb AAF41809.1  (AE002495) ferredoxin--NADP reductase [Neisseria meningitidis MC58] COG1018 Flavodoxin reductases (ferredoxin-NADPH)                                                                                                                   |
| NGO0735 | 0.5146 | 2.73  | up   | 0.9184 | 1.15  | up   | 0.9612 | -1.10 | down | hypothetical protein\ Context:(NC_002946)+[732156-732314]\ Notes:                                                                                                                                                                                                                                                                          |
| NGO0736 | 0.8895 | 1.07  | up   | 0.8360 | 1.09  | up   | 0.3266 | -2.22 | down | hypothetical protein\ Context:(NC_002946)-[732449-732745]\ Notes:Best Blastp Hit: gb AAF42108.1  (AE002526) hypothetical protein [Neisseria meningitidis MC58]                                                                                                                                                                             |
| NGO0738 | 0.5548 | -1.66 | down | 0.0358 | -5.08 | down | 0.2242 | -2.49 | down | putative DNA-damage-inducible protein\ Context:(NC_002946)+[733057-734115]\ Notes:Best Blastp Hit: emb CAB72023.1  (AJ391259) putative DNA-damage inducible protein P [Neisseria meningitidis] >gi 7380303 emb CAB84889.1  (AL162756) impB/mucB/samB family protein [Neisseria meningitidis] COG0389 Nucleotidyltransferase/DNA polymerase |

|         |        |       |      |        |       |      |        |       |      |                                                                                                                                                                                                                                                                                                                                                                                                |
|---------|--------|-------|------|--------|-------|------|--------|-------|------|------------------------------------------------------------------------------------------------------------------------------------------------------------------------------------------------------------------------------------------------------------------------------------------------------------------------------------------------------------------------------------------------|
| NGO0739 | 0.9892 | -1.01 | down | 0.8283 | 1.11  | up   | 0.9773 | 1.01  | up   | putative ATP-dependent DNA helicase\<br>Context:(NC_002946)-[734185-736200]\ Notes:Best Blastp Hit: possibly phase variable - two 8A residue homopolymer repeats in the coding sequence (ON) COG0210 Superfamily I DNA and RNA helicases                                                                                                                                                       |
| NGO0740 | 0.1595 | 3.23  | up   | 0.6476 | -1.46 | down | 0.7255 | -1.31 | down | 3-dehydroquinate dehydratase\<br>Context:(NC_002946)-[736220-736984]\ Notes:catalyzes the dehydration of 3-dehydroquinate to form 3-dehydroshikimate in aromatic amino acid biosynthesis                                                                                                                                                                                                       |
| NGO0741 | 0.6302 | 1.27  | up   | 0.8339 | -1.09 | down | 0.9493 | -1.02 | down | recombinase A\<br>Context:(NC_002946)+[737184-738230]\ Notes:catalyzes the hydrolysis of ATP in the presence of single-stranded DNA; the ATP-dependent uptake of single-stranded DNA by duplex DNA; and the ATP-dependent hybridization of homologous single-stranded DNAs                                                                                                                     |
| NGO0742 | 0.0719 | 3.18  | up   | 0.0535 | 5.84  | up   | 0.1337 | 2.20  | up   | hypothetical protein\<br>Context:(NC_002946)-[738883-739218]\ Notes:Best Blastp Hit: pir   E81082 conserved hypothetical protein NMB1444 [imported] - Neisseria meningitidis (group B strain MD58)<br>>gi 7226685 gb AAF41804.1  (AE002494) conserved hypothetical protein [Neisseria meningitidis MC58]<br>COG0718 Uncharacterized BCR; YbaB family                                           |
| NGO0743 | 0.9775 | -1.02 | down | 0.5225 | 1.50  | up   | 0.4945 | -1.46 | down | DNA polymerase III subunits gamma and tau\<br>Context:(NC_002946)-[739299-741422]\ Notes:catalyzes the DNA-template-directed extension of the 3'-end of a DNA strand; the tau chain serves as a scaffold to help in the dimerization of the alpha;epsilon and theta core complex; the gamma chain seems to interact with the delta and delta' subunits to transfer the beta subunit on the DNA |
| NGO0744 | 0.7204 | -1.18 | down | 0.5604 | 1.79  | up   | 0.5103 | 1.45  | up   | DNA mismatch repair protein\<br>Context:(NC_002946)-[741517-743493]\ Notes:This protein is involved in the repair of mismatches in DNA. It is required for dam-dependent methyl-directed DNA mismatch repair. Promotes the formation of a stable complex between two or more DNA-binding proteins in an ATP-dependent manner without itself being part of a final effector complex             |

|         |        |       |      |        |       |      |        |       |      |                                                                                                                                                                                                                                                                                                                                                                                                                                                               |
|---------|--------|-------|------|--------|-------|------|--------|-------|------|---------------------------------------------------------------------------------------------------------------------------------------------------------------------------------------------------------------------------------------------------------------------------------------------------------------------------------------------------------------------------------------------------------------------------------------------------------------|
| NGO0745 | 0.6010 | 1.37  | up   | 0.7112 | 1.15  | up   | 0.6414 | 1.17  | up   | hypothetical protein\ Context:(NC_002946)+[743637-743822]\ Notes:Best Blastp Hit: emb CAB84882.1  (AL162756) hypothetical protein [Neisseria meningitidis]                                                                                                                                                                                                                                                                                                    |
| NGO0746 | 0.7217 | -1.34 | down | 0.2878 | -1.64 | down | 0.5497 | -1.26 | down | putative O-methyltransferase\ Context:(NC_002946)+[743833-744501]\ Notes:Best Blastp Hit: pir   A81860 probable methyltransferase NMA1653 [imported] - Neisseria meningitidis (group A strain Z2491) >gi 7380295 emb CAB84881.1  (AL162756) putative methyltransferase [Neisseria meningitidis] COG0500 SAM-dependent methyltransferases                                                                                                                      |
| NGO0747 | 0.9334 | 1.06  | up   | 0.2550 | 1.79  | up   | 0.5929 | 1.24  | up   | hypothetical protein\ Context:(NC_002946)+[744501-745214]\ Notes:Best Blastp Hit: pir   H81083 hypothetical protein NMB1440 [imported] - Neisseria meningitidis (group B strain MD58) >gi 7226681 gb AAF41801.1  (AE002493) hypothetical protein [Neisseria meningitidis MC58]                                                                                                                                                                                |
| NGO0748 | 0.4459 | -1.62 | down | 0.1259 | -2.72 | down | 0.4262 | -2.33 | down | putative phosphoribosylaminoimidazole carboxylase catalytic subunit\ Context:(NC_002946)+[745262-745747]\ Notes:Best Blastp Hit: pir   G81083 phosphoribosylaminoimidazole carboxylase; catalytic chain NMB1439 [imported] - Neisseria meningitidis (group B strain MD58) >gi 7226680 gb AAF41800.1  (AE002493) phosphoribosylaminoimidazole carboxylase; catalytic subunit [Neisseria meningitidis MC58] COG0041 Phosphoribosylcarboxyaminoimidazole (NCAIR) |
| NGO0751 | 0.0197 | -6.83 | down | 0.0328 | -4.22 | down | 0.4530 | -2.01 | down | hypothetical protein\ Context:(NC_002946)+[747669-748577]\ Notes:Best Blastp Hit: emb CAC03614.1  (AJ272538) hypothetical protein [Kluyvera ascorbata]                                                                                                                                                                                                                                                                                                        |

|         |        |       |      |        |       |      |        |       |      |                                                                                                                                                                                                                                                                                                                                                                                                                                                                                                                                                                                                            |
|---------|--------|-------|------|--------|-------|------|--------|-------|------|------------------------------------------------------------------------------------------------------------------------------------------------------------------------------------------------------------------------------------------------------------------------------------------------------------------------------------------------------------------------------------------------------------------------------------------------------------------------------------------------------------------------------------------------------------------------------------------------------------|
| NGO0752 | 0.6878 | -1.27 | down | 0.1510 | 2.86  | up   | 0.5144 | -1.58 | down | NarL/NarP\ Context:(NC_002946)-[748733-749389]\<br>Notes:Best Blastp Hit: pir    C81104 transcription regulator;<br>LuxR family NMB1250 [imported] - Neisseria meningitidis<br>(group B strain MD58; group A strain Z2491)<br>>gi 7226490 gb AAF41630.1  (AE002473) transcriptional<br>regulator; LuxR family [Neisseria meningitidis MC58]<br>>gi 7380078 emb CAB84659.1  (AL162755) putative two-<br>component system response regulator [Neisseria<br>meningitidis] COG2197 Response regulators consisting of a;<br>putative nitrite/nitrate two-component system<br>transcriptional response regulator |
| NGO0753 | 0.0985 | 2.43  | up   | 0.5379 | 1.54  | up   | 0.5476 | 1.25  | up   | NarX/NarQ\ Context:(NC_002946)-[749386-751155]\<br>Notes:Best Blastp Hit: pir    B81104 nitrate/nitrite sensor<br>protein (EC 2.7.3.-) NMB1249 [similarity] - Neisseria<br>meningitidis (group B strain MD58)<br>>gi 7226489 gb AAF41629.1  (AE002473) nitrate/nitrite<br>sensory protein NarX; putative [Neisseria meningitidis<br>MC58] COG0642 Sensory transduction histidine kinases;<br>putative nitrite/nitrate two-component system sensor<br>kinase                                                                                                                                                |
| NGO0754 | 0.5471 | 1.80  | up   | 0.0154 | -6.32 | down | 0.8806 | -1.14 | down | putative molybdopterin-guanine dinucleotide biosynthesis<br>protein\ Context:(NC_002946)+[751362-751976]\<br>Notes:Best Blastp Hit: emb CAB84657.1  (AL162755)<br>putative molybdopterin-guanine dinucleotide biosynthesis<br>protein A [Neisseria meningitidis] COG0746 Molybdopterin-<br>guanine dinucleotide                                                                                                                                                                                                                                                                                            |
| NGO0755 | 0.4726 | 1.39  | up   | 0.7707 | 1.11  | up   | 0.6919 | 1.12  | up   | riboflavin synthase subunit alpha\<br>Context:(NC_002946)+[752139-752756]\ Notes:catalyzes<br>the formation of riboflavin from 6;7-dimethyl-8-(1-D-<br>ribityl)lumazine                                                                                                                                                                                                                                                                                                                                                                                                                                    |
| NGO0756 | 0.5499 | 1.46  | up   | 0.5891 | -1.44 | down | 0.1855 | -2.02 | down | hypothetical protein\ Context:(NC_002946)+[752764-<br>753627]\ Notes:Best Blastp Hit: pir    H81910 hypothetical<br>protein NMA1415 [imported] - Neisseria meningitidis<br>(group A strain Z2491) >gi 7380074 emb CAB84655.1 <br>(AL162755) hypothetical protein NMA1415 [Neisseria<br>meningitidis]                                                                                                                                                                                                                                                                                                       |



|         |        |       |      |        |       |      |        |       |      |                                                                                                                                                                                                                                                                                                                                                                                                                                                   |
|---------|--------|-------|------|--------|-------|------|--------|-------|------|---------------------------------------------------------------------------------------------------------------------------------------------------------------------------------------------------------------------------------------------------------------------------------------------------------------------------------------------------------------------------------------------------------------------------------------------------|
| NGO0757 | 0.0081 | 5.13  | up   | 0.0048 | 6.09  | up   | 0.0370 | 2.92  | up   | hypothetical protein\ Context:(NC_002946)-[753640-754074]\ Notes:Best Blastp Hit: emb CAB84654.1  (AL162755) putative periplasmic protein [Neisseria meningitidis]                                                                                                                                                                                                                                                                                |
| NGO0758 | 0.3243 | -1.61 | down | 0.4475 | -1.56 | down | 0.2356 | -1.52 | down | putative ribulose-phosphate 3-epimerase\ Context:(NC_002946)+[754220-754912]\ Notes:Best Blastp Hit: pir   A81106 ribulose-phosphate 3-epimerase NMB1244 [imported] - Neisseria meningitidis (group B strain MD58) >gi 7226484 gb AAF41625.1  (AE002472) ribulose-phosphate 3-epimerase [Neisseria meningitidis MC58] COG0036 Pentose-5-phosphate-3-epimerase                                                                                     |
| NGO0759 | 0.9116 | -1.10 | down | 0.8247 | -1.24 | down | 0.8419 | -1.20 | down | hypothetical protein\ Context:(NC_002946)-[755001-755147]\ Notes:                                                                                                                                                                                                                                                                                                                                                                                 |
| NGO0760 | 0.3315 | -2.10 | down | 0.0751 | -3.84 | down | 0.6872 | 1.14  | up   | Holliday junction DNA helicase B\ Context:(NC_002946)-[755151-756182]\ Notes:promotes strand exchange during homologous recombination; RuvAB complex promotes branch migration; RuvABC complex scans the DNA during branch migration and resolves Holliday junctions at consensus sequences; forms hexameric rings around opposite DNA arms; requires ATP for branch migration and orientation of RuvAB complex determines direction of migration |
| NGO0761 | 0.0279 | -5.63 | down | 0.0265 | -5.45 | down | 0.0027 | -7.40 | down | hypothetical protein\ Context:(NC_002946)-[756266-756574]\ Notes:Best Blastp Hit: pir   G81105 hypothetical protein NMB1242 [imported] - Neisseria meningitidis (group B strain MD58) >gi 7226482 gb AAF41623.1  (AE002472) hypothetical protein [Neisseria meningitidis MC58]                                                                                                                                                                    |
| NGO0762 | 0.3443 | -2.37 | down | 0.0445 | -3.11 | down | 0.4493 | -1.62 | down | hypothetical protein\ Context:(NC_002946)+[756606-756746]\ Notes:                                                                                                                                                                                                                                                                                                                                                                                 |

|         |        |       |      |        |       |      |        |       |      |                                                                                                                                                                                                                                                                                                                                                                                                                                                                                                                                                                                                                                                                                                                                                              |
|---------|--------|-------|------|--------|-------|------|--------|-------|------|--------------------------------------------------------------------------------------------------------------------------------------------------------------------------------------------------------------------------------------------------------------------------------------------------------------------------------------------------------------------------------------------------------------------------------------------------------------------------------------------------------------------------------------------------------------------------------------------------------------------------------------------------------------------------------------------------------------------------------------------------------------|
| NGO0763 | 0.3092 | 1.73  | up   | 0.1180 | 1.78  | up   | 0.8859 | 1.05  | up   | multifunctional tRNA nucleotidyl transferase/2'3'-cyclic phosphodiesterase/2'nucleotidase/phosphatase\<br>Context:(NC_002946)-[756992-758224]\ Notes:catalyzes the addition and repair of the essential 3'-terminal CCA sequence in tRNAs without using a nucleic acid template; phosphohydrolase activities include hydrolysis of pyrophosphate; 5'-nucleoside tri- and diphosphates; NADP; and 2'-AMP with the production of Pi; metal-dependent phosphodiesterase activity for 2';3'-cAMP; 2';3'-cGMP; and 2';3'-cCMP; and hydrolysis 2';3'-cyclic substrates with the formation of 2'-nucleotides and 3'-nucleotides; these phosphohydrolase activities are probably involved in the repair of the tRNA 3'-CCA terminus degraded by intracellular RNases |
| NGO0764 | 0.2026 | 1.82  | up   | 0.6159 | 1.25  | up   | 0.7453 | 1.11  | up   | putative ABC-transporter; ATP-binding protein\<br>Context:(NC_002946)-[758303-759931]\ Notes:Best Blastp Hit: gb AAF41621.1  (AE002472) ABC transporter; ATP-binding protein [Neisseria meningitidis MC58] COG0488 ATPase components of ABC transporters with                                                                                                                                                                                                                                                                                                                                                                                                                                                                                                |
| NGO0765 | 0.4788 | -1.39 | down | 0.8861 | -1.06 | down | 0.5994 | -1.20 | down | hypothetical protein\<br>Context:(NC_002946)+[760081-760455]\ Notes:Best Blastp Hit: gb AAF41620.1  (AE002472) conserved hypothetical protein [Neisseria meningitidis MC58] COG1393 Arsenate reductase; E.coli type                                                                                                                                                                                                                                                                                                                                                                                                                                                                                                                                          |
| NGO0766 | 0.5517 | 1.30  | up   | 0.9097 | 1.05  | up   | 0.5951 | 1.16  | up   | putative peptidyl-prolyl cis-trans isomerase\<br>Context:(NC_002946)+[760504-762042]\ Notes:Best Blastp Hit: gb AAF41619.1  (AE002472) peptidyl-prolyl cis-trans isomerase-related protein [Neisseria meningitidis MC58] COG0760 Parvulin-like peptidyl-prolyl isomerase                                                                                                                                                                                                                                                                                                                                                                                                                                                                                     |
| NGO0767 | 0.0746 | 7.45  | up   | 0.7107 | -1.24 | down | 0.3564 | -3.46 | down | putative recombination protein\<br>Context:(NC_002946)+[762109-762726]\ Notes:Best Blastp Hit: pir   G81909 probable recombination protein NMA1406 [imported] - Neisseria meningitidis (group A strain Z2491) >gi 7380065 emb CAB84646.1  (AL162755) putative recombination protein [Neisseria meningitidis] COG0353 Recombinational DNA repair protein                                                                                                                                                                                                                                                                                                                                                                                                      |

|         |        |       |      |        |       |      |        |       |      |                                                                                                                                                                                                                                                                                                                                                                                                                                                                    |
|---------|--------|-------|------|--------|-------|------|--------|-------|------|--------------------------------------------------------------------------------------------------------------------------------------------------------------------------------------------------------------------------------------------------------------------------------------------------------------------------------------------------------------------------------------------------------------------------------------------------------------------|
| NGO0768 | 0.8637 | 1.08  | up   | 0.9618 | -1.02 | down | 0.4981 | 1.30  | up   | hypothetical protein\ Context:(NC_002946)-[762907-763158]\ Notes:                                                                                                                                                                                                                                                                                                                                                                                                  |
| NGO0769 | 0.7564 | -1.15 | down | 0.5528 | -1.33 | down | 0.4715 | -1.41 | down | LoIC\ Context:(NC_002946)+[763287-764534]\ Notes:Best Blastp Hit: sp P57062 LOLC_NEIMB lipoprotein releasing system transmembrane protein LoIC >gi 11279734 pir D81107 conserved hypothetical protein NMB1235 [imported] - Neisseria meningitidis (group B strain MD58) >gi 7226474 gb AAF41616.1  (AE002471) conserved hypothetical protein [Neisseria meningitidis MC58] COG0577 Predicted permease; putative lipoprotein releasing system transmembrane protein |
| NGO0770 | 0.4218 | 1.69  | up   | 0.1807 | 1.78  | up   | 0.5215 | 1.19  | up   | hypothetical protein\ Context:(NC_002946)+[764527-765222]\ Notes:Best Blastp Hit: sp P57031 LOLD_NEIMB lipoprotein releasing system ATP-binding protein LoID >gi 11277321 pir  C81107 ABC transporter; ATP-binding protein NMB1234 [imported] - Neisseria meningitidis (group B strain MD58) >gi 7226473 gb AAF41615.1  (AE002471) ABC transporter; ATP-binding protein [Neisseria meningitidis MC58] COG1136 ABC-type (unclassified) transport system             |
| NGO0771 | 0.1789 | 1.95  | up   | 0.0438 | 2.79  | up   | 0.6971 | 1.13  | up   | putative exodeoxyribonuclease V alpha subunit\ Context:(NC_002946)+[765289-767034]\ Notes:Best Blastp Hit: gb AAC14132.1  (AF058330) RecD [Neisseria gonorrhoeae] COG0507 ATP-dependent exoDNase (exonuclease V)                                                                                                                                                                                                                                                   |
| NGO0773 | 0.0225 | 5.64  | up   | 0.0320 | 2.27  | up   | 0.3249 | 1.31  | up   | Irg1\ Context:(NC_002946)+[767722-768723]\ Notes:Best Blastp Hit: gb AAC82509.1  (U65994) pilin gene inverting protein homolog PivNG [Neisseria gonorrhoeae]; putative invertase related gene 1                                                                                                                                                                                                                                                                    |
| NGO0774 | 0.0692 | -4.11 | down | 0.1267 | -9.79 | down | 0.6051 | 1.26  | up   | hypothetical protein\ Context:(NC_002946)+[768871-769440]\ Notes:                                                                                                                                                                                                                                                                                                                                                                                                  |
| NGO0775 | 0.1248 | 3.10  | up   | 0.0517 | 3.28  | up   | 0.1191 | 3.82  | up   | hypothetical protein\ Context:(NC_002946)+[769563-772025]\ Notes:Best Blastp Hit: pir  H81106 ATP-dependent proteinase La NMB1231 [imported] - Neisseria meningitidis (group B strain MD58) >gi 7226470 gb AAF41612.1  (AE002471) ATP-dependent protease La [Neisseria meningitidis MC58] COG0466 ATP-dependent Lon protease; bacterial type                                                                                                                       |

|         |        |       |      |        |       |      |        |       |      |                                                                                                                                                                                                                                                                                                                                                                                                                                                                                  |
|---------|--------|-------|------|--------|-------|------|--------|-------|------|----------------------------------------------------------------------------------------------------------------------------------------------------------------------------------------------------------------------------------------------------------------------------------------------------------------------------------------------------------------------------------------------------------------------------------------------------------------------------------|
| NGO0776 | 0.6344 | -1.34 | down | 0.7470 | -1.28 | down | 0.0346 | 2.52  | up   | hypothetical protein\ Context:(NC_002946)-[772015-772605]\ Notes:                                                                                                                                                                                                                                                                                                                                                                                                                |
| NGO0777 | 0.1531 | 2.62  | up   | 0.2676 | 1.48  | up   | 0.2588 | 1.65  | up   | DbhA\ Context:(NC_002946)+[772207-772476]\ Notes:Best Blastp Hit: pir    G81106 DNA-binding protein HU-beta NMB1230 [imported] - Neisseria meningitidis (group B strain MD58; group A strain Z2491)<br>>gi 7226469 gb AAF41611.1  (AE002471) DNA-binding protein HU-beta [Neisseria meningitidis MC58]<br>>gi 7380057 emb CAB84638.1  (AL162755) putative DNA-binding protein [Neisseria meningitidis] COG0776 Histone-like DNA-binding protein; putative DNA-binding protein Hu |
| NGO0778 | 0.1399 | 2.58  | up   | 0.5191 | 1.78  | up   | 0.5047 | 1.55  | up   | hypothetical protein\ Context:(NC_002946)-[772652-773086]\ Notes:Best Blastp Hit: pir    F81908 probable membrane protein NMA1396 [imported] - Neisseria meningitidis (group A strain Z2491)<br>>gi 7380056 emb CAB84637.1  (AL162755) putative membrane protein [Neisseria meningitidis]                                                                                                                                                                                        |
| NGO0779 | 0.0096 | 6.38  | up   | 0.0847 | 3.32  | up   | 0.1626 | 1.53  | up   | homoserine dehydrogenase\ Context:(NC_002946)-[773079-774386]\ Notes:catalyzes the formation of L-aspartate 4-semialdehyde from L-homoserine                                                                                                                                                                                                                                                                                                                                     |
| NGO0780 | 0.3004 | 1.76  | up   | 0.8921 | 1.06  | up   | 0.5830 | -1.38 | down | hypothetical protein\ Context:(NC_002946)+[774582-774953]\ Notes:Best Blastp Hit: pir    D81108 conserved hypothetical protein NMB1227 [imported] - Neisseria meningitidis (group B strain MD58)<br>>gi 7226465 gb AAF41608.1  (AE002470) conserved hypothetical protein [Neisseria meningitidis MC58]                                                                                                                                                                           |
| NGO0781 | 0.0502 | 4.28  | up   | 0.0970 | 7.01  | up   | 0.1176 | 1.62  | up   | putative ABC transporter; ATP-binding protein\ Context:(NC_002946)+[775030-776952]\ Notes:Best Blastp Hit: gb AAF41607.1  (AE002470) ABC transporter; ATP-binding protein [Neisseria meningitidis MC58] COG0488 ATPase components of ABC transporters with                                                                                                                                                                                                                       |
| NGO0782 | 0.1895 | 2.20  | up   | 0.0917 | 1.97  | up   | 0.3110 | 1.47  | up   | hypothetical protein\ Context:(NC_002946)+[776978-777334]\ Notes:Best Blastp Hit: pir    C81908 probable periplasmic protein NMA1391 [imported] - Neisseria meningitidis (group A strain Z2491)<br>>gi 7380053 emb CAB84633.1  (AL162755) putative periplasmic protein [Neisseria meningitidis]                                                                                                                                                                                  |

|         |        |        |      |        |        |      |        |       |      |                                                                                                                                                                                                                                                                                                                                                                                    |
|---------|--------|--------|------|--------|--------|------|--------|-------|------|------------------------------------------------------------------------------------------------------------------------------------------------------------------------------------------------------------------------------------------------------------------------------------------------------------------------------------------------------------------------------------|
| NGO0783 | 0.3774 | -1.49  | down | 0.9898 | 1.01   | up   | 0.5414 | -1.18 | down | hypothetical protein\ Context:(NC_002946)+[777425-777937]\ Notes:Best Blastp Hit: pir     B81108 hypothetical protein NMB1225 [imported] - Neisseria meningitidis (group B strain MD58) >gi 7226463 gb AAF41606.1  (AE002470) hypothetical protein [Neisseria meningitidis MC58]                                                                                                   |
| NGO0784 | 0.0086 | -5.05  | down | 0.8601 | -1.11  | down | 0.0254 | -5.24 | down | hypothetical protein\ Context:(NC_002946)+[777985-778161]\ Notes:                                                                                                                                                                                                                                                                                                                  |
| NGO0785 | 0.0032 | -30.06 | down | 0.1696 | -13.80 | down | 0.4439 | -3.58 | down | hypothetical protein\ Context:(NC_002946)+[778408-778830]\ Notes:                                                                                                                                                                                                                                                                                                                  |
| NGO0786 | 0.6540 | -1.31  | down | 0.0201 | -3.84  | down | 0.0457 | 2.25  | up   | uracil-DNA glycosylase\ Context:(NC_002946)-[778867-779526]\ Notes:Excises uracil residues from the DNA which can arise as a result of misincorporation of dUMP residues by DNA polymerase or due to deamination of cytosine                                                                                                                                                       |
| NGO0787 | 0.2967 | 1.69   | up   | 0.7180 | 1.17   | up   | 0.3221 | 1.32  | up   | hypothetical protein\ Context:(NC_002946)+[779607-780014]\ Notes:Best Blastp Hit: pir     A81908 probable membrane protein NMA1383 [imported] - Neisseria meningitidis (group A strain Z2491) >gi 7380051 emb CAB84629.1  (AL162755) putative membrane protein [Neisseria meningitidis]                                                                                            |
| NGO0788 | 0.1062 | 2.78   | up   | 0.0687 | 2.02   | up   | 0.1168 | 2.19  | up   | GNA1220\ Context:(NC_002946)+[780029-780976]\ Notes:Best Blastp Hit: gb AAF44771.1 AF235154_1 (AF235154) GNA1220 [Neisseria gonorrhoeae] >gi 7274434 gb AAF44772.1 AF235155_1 (AF235155) GNA1220 [Neisseria gonorrhoeae] >gi 7274436 gb AAF44773.1 AF235156_1 (AF235156) GNA1220 [Neisseria gonorrhoeae] COG0330 Membrane protease subunits; genome-derived Neisseria antigen 1220 |
| NGO0789 | 0.0293 | -4.41  | down | 0.0016 | -21.71 | down | 0.2386 | -2.76 | down | hypothetical protein\ Context:(NC_002946)-[781083-782153]\ Notes:Best Blastp Hit: gb AAF41601.1  (AE002470) transporter; putative [Neisseria meningitidis MC58] COG0628 Predicted permease                                                                                                                                                                                         |
| NGO0790 | 0.3709 | 3.57   | up   | 0.3367 | -5.06  | down | 0.7873 | 1.39  | up   | hypothetical protein\ Context:(NC_002946)-[782211-782369]\ Notes:                                                                                                                                                                                                                                                                                                                  |

|         |        |       |      |        |        |      |        |       |      |                                                                                                                                                                                                                                                                                                                                                                                                                                                                                  |
|---------|--------|-------|------|--------|--------|------|--------|-------|------|----------------------------------------------------------------------------------------------------------------------------------------------------------------------------------------------------------------------------------------------------------------------------------------------------------------------------------------------------------------------------------------------------------------------------------------------------------------------------------|
| NGO0791 | 0.8101 | 1.14  | up   | 0.7104 | -1.17  | down | 0.8689 | -1.05 | down | hypothetical protein\ Context:(NC_002946)+[782338-782613]\ Notes:Best Blastp Hit: gb AAF41600.1  (AE002469) conserved hypothetical protein [Neisseria meningitidis MC58] >gi 7380048 emb CAB84626.1  (AL162755) hypothetical protein NMA1380 [Neisseria meningitidis]                                                                                                                                                                                                            |
| NGO0792 | 0.8497 | -1.09 | down | 0.7495 | -1.14  | down | 0.9573 | 1.02  | up   | putative lipocate-protein ligase\ Context:(NC_002946)+[782666-783238]\ Notes:Best Blastp Hit: pir E81109 lipocate-protein ligase B NMB1217 [imported] - Neisseria meningitidis (group B strain MD58) >gi 7226455 gb AAF41599.1  (AE002469) lipocate-protein ligase B [Neisseria meningitidis MC58] COG0321 Lipocate-protein ligase B                                                                                                                                             |
| NGO0793 | 0.2725 | 1.81  | up   | 0.3703 | 1.89   | up   | 0.9476 | 1.03  | up   | lipoyl synthase\ Context:(NC_002946)+[783231-784214]\ Notes:catalyzes the radical-mediated insertion of two sulfur atoms into an acyl carrier protein (ACP) bound to an octanoyl group to produce a lipoyl group                                                                                                                                                                                                                                                                 |
| NGO0794 | 0.5936 | 1.35  | up   | 0.8772 | -1.05  | down | 0.8555 | 1.06  | up   | BfrA\ Context:(NC_002946)+[784689-785153]\ Notes:Best Blastp Hit: sp P72080 BFRA_NEIMB bacterioferritin A (Bfr A) >gi 11277091 pir F81110 bacterioferritin A NMB1207 [imported] - Neisseria meningitidis (group B strain MD58) >gi 1673579 gb AAB18968.1  (U76633) bacterioferritin [Neisseria gonorrhoeae] >gi 7226444 gb AAF41589.1  (AE002468) bacterioferritin A [Neisseria meningitidis MC58] COG2193 Bacterioferritin (cytochrome b1)                                      |
| NGO0795 | 0.8825 | 1.09  | up   | 0.7736 | -1.10  | down | 0.6317 | 1.21  | up   | BfrB\ Context:(NC_002946)+[785181-785654]\ Notes:Best Blastp Hit: sp P56999 BFRB_NEIMA bacterioferritin B (Bfr B) >gi 11277092 pir E81110 bacterioferritin B NMB1206 [imported] - Neisseria meningitidis (group B strain MD58; group A strain Z2491) >gi 7226443 gb AAF41588.1  (AE002468) bacterioferritin B [Neisseria meningitidis MC58] >gi 7380044 emb CAB84622.1  (AL162755) putative bacterioferritin B [Neisseria meningitidis] COG2193 Bacterioferritin (cytochrome b1) |
| NGO0796 | 0.0680 | -3.44 | down | 0.0303 | -12.26 | down | 0.7412 | -1.44 | down | hypothetical protein\ Context:(NC_002946)-[785742-786314]\ Notes:Best Blastp Hit: possibly phase variable - 8A residue homopolymer repeat in the coding sequence (ON)                                                                                                                                                                                                                                                                                                            |

|         |        |       |      |        |        |      |        |       |      |                                                                                                                                                                                                                                                                                                                                                                                                                                                                                                    |
|---------|--------|-------|------|--------|--------|------|--------|-------|------|----------------------------------------------------------------------------------------------------------------------------------------------------------------------------------------------------------------------------------------------------------------------------------------------------------------------------------------------------------------------------------------------------------------------------------------------------------------------------------------------------|
| NGO0797 | 0.2321 | -2.81 | down | 0.6924 | -1.30  | down | 0.4406 | -1.72 | down | putative transcriptional regulator\<br>Context:(NC_002946)+[785985-786302]\ Notes:Best Blastp<br>Hit: pir   C81110 transcription regulator NMB1204<br>[imported] - Neisseria meningitidis (group B strain MD58;<br>group A strain Z2491) >gi 7226441 gb AAF41586.1 <br>(AE002468) transcriptional regulator [Neisseria meningitidis<br>MC58] >gi 7380043 emb CAB84621.1  (AL162755)<br>putative transcriptional regulator [Neisseria meningitidis]<br>COG1396 Predicted transcriptional regulators |
| NGO0798 | 0.4557 | -2.07 | down | 0.0370 | -19.51 | down | 0.2020 | 3.02  | up   | putative uridylyltransferase\<br>Context:(NC_002946)+[786351-788909]\ Notes:Best Blastp<br>Hit: pir   B81110 protein-PII uridylyltransferase NMB1203<br>[imported] - Neisseria meningitidis (group B strain MD58)<br>>gi 7226440 gb AAF41585.1  (AE002468) protein-PII<br>uridylyltransferase [Neisseria meningitidis MC58]                                                                                                                                                                        |
| NGO0799 | 0.8939 | -1.07 | down | 0.4313 | -1.37  | down | 0.9641 | 1.01  | up   | inositol-5-monophosphate dehydrogenase\<br>Context:(NC_002946)+[789056-790519]\ Notes:catalyzes<br>the synthesis of xanthosine monophosphate by the NAD+<br>dependent oxidation of inosine monophosphate                                                                                                                                                                                                                                                                                           |
| NGO0800 | 0.0528 | 3.96  | up   | 0.5780 | 1.69   | up   | 0.1948 | 1.85  | up   | hypothetical protein\<br>Context:(NC_002946)-[790591-<br>790839]\ Notes:                                                                                                                                                                                                                                                                                                                                                                                                                           |
| NGO0801 | 0.0345 | 2.76  | up   | 0.2397 | 1.74   | up   | 0.4543 | 1.43  | up   | putative ribonuclease\<br>Context:(NC_002946)-[790855-<br>793230]\ Notes:Best Blastp Hit: pir   G81109 ribonuclease II<br>family protein NMB1200 [imported] - Neisseria meningitidis<br>(group B strain MD58) >gi 7226437 gb AAF41582.1 <br>(AE002468) ribonuclease II family protein [Neisseria<br>meningitidis MC58] COG0557 Exoribonucleases                                                                                                                                                    |
| NGO0802 | 0.0420 | -3.31 | down | 0.3719 | 1.45   | up   | 0.8756 | -1.09 | down | hypothetical protein\<br>Context:(NC_002946)+[793665-<br>793934]\ Notes:Best Blastp Hit: emb CAB84478.1 <br>(AL162755) hypothetical protein NMA1218 [Neisseria<br>meningitidis]                                                                                                                                                                                                                                                                                                                    |

|         |        |       |      |        |        |      |        |       |      |                                                                                                                                                                                                                                                                                                                                                                                                                                                                                          |
|---------|--------|-------|------|--------|--------|------|--------|-------|------|------------------------------------------------------------------------------------------------------------------------------------------------------------------------------------------------------------------------------------------------------------------------------------------------------------------------------------------------------------------------------------------------------------------------------------------------------------------------------------------|
| NGO0803 | 0.0448 | 3.13  | up   | 0.0283 | 2.50   | up   | 0.1026 | 1.65  | up   | putative GTP-binding protein\ Context:(NC_002946)-[793931-795742]\ Notes:Best Blastp Hit: pir    H81111 GTP-binding protein TypA NMB1199 [imported] - Neisseria meningitidis (group B strain MD58) >gi 7226435 gb AAF41581.1  (AE002467) GTP-binding protein TypA [Neisseria meningitidis MC58] COG1217 Membrane GTPase                                                                                                                                                                  |
| NGO0804 | 0.0018 | -8.49 | down | 0.0063 | -9.61  | down | 0.0336 | -5.67 | down | hypothetical protein\ Context:(NC_002946)-[795859-796749]\ Notes:Best Blastp Hit: pir    C81906 hypothetical protein NMA1369 [imported] - Neisseria meningitidis (group A strain Z2491) >gi 7380037 emb CAB84615.1  (AL162755) hypothetical protein NMA1369 [Neisseria meningitidis] COG0063 Predicted sugar kinase                                                                                                                                                                      |
| NGO0805 | 0.0210 | -6.84 | down | 0.0008 | -20.93 | down | 0.0528 | -5.48 | down | hypothetical protein\ Context:(NC_002946)+[796889-797470]\ Notes:Best Blastp Hit: pir    F81111 nickel-dependent hydrogenase; b-type cytochrome chain NMB1196; NMB1158 [imported] - Neisseria meningitidis (group B strain MD58) >gi 7226395 gb AAF41544.1  (AE002464) nickel-dependent hydrogenase; b-type cytochrome subunit [Neisseria meningitidis MC58] >gi 7226433 gb AAF41579.1  (AE002467) nickel-dependent hydrogenase; b-type cytochrome subunit [Neisseria meningitidis MC58] |
| NGO0806 | 0.6021 | 1.57  | up   | 0.2805 | -4.42  | down | 0.7104 | -1.44 | down | hypothetical protein\ Context:(NC_002946)+[797898-798980]\ Notes:Best Blastp Hit: >gi 11354227 pir   T46867 uroporphyrin-III C-methyltransferase (EC 2.1.1.107) [imported] - Neisseria meningitidis gi 1752671 emb CAA71251.1  (Y10177) sirohaem synthase [Neisseria meningitidis]                                                                                                                                                                                                       |
| NGO0809 | 0.5506 | 1.31  | up   | 0.7360 | -1.11  | down | 0.9179 | -1.03 | down | dihydroxy-acid dehydratase\ Context:(NC_002946)+[802735-804594]\ Notes:catalyzes the dehydration of 2;3-dihydroxy-3-methylbutanoate to 3-methyl-2-oxobutanoate in valine and isoleucine biosynthesis                                                                                                                                                                                                                                                                                     |
| NGO0810 | 0.8494 | 1.22  | up   | 0.2375 | -1.98  | down | 0.5300 | -1.34 | down | hypothetical protein\ Context:(NC_002946)+[804636-804938]\ Notes:Best Blastp Hit: gb AAA47469.1  (M57505) ORF3 [Pseudorabies virus]                                                                                                                                                                                                                                                                                                                                                      |



|         |        |       |      |        |       |      |        |       |      |                                                                                                                                                                                                                                                                                                                                                                                                                                                                                                                                      |
|---------|--------|-------|------|--------|-------|------|--------|-------|------|--------------------------------------------------------------------------------------------------------------------------------------------------------------------------------------------------------------------------------------------------------------------------------------------------------------------------------------------------------------------------------------------------------------------------------------------------------------------------------------------------------------------------------------|
| NGO0811 | 0.0774 | -3.08 | down | 0.5501 | -1.52 | down | 0.4141 | -1.56 | down | hypothetical protein\ Context:(NC_002946)-[804781-805686]\ Notes:Best Blastp Hit: gb AAF41535.1  (AE002463) hypothetical protein [Neisseria meningitidis MC58] >gi 7226423 gb AAF41570.1  (AE002466) hypothetical protein [Neisseria meningitidis MC58]                                                                                                                                                                                                                                                                              |
| NGO0812 | 0.1886 | -2.05 | down | 0.0038 | -5.36 | down | 0.0435 | -3.95 | down | hypothetical protein\ Context:(NC_002946)+[805132-805749]\ Notes:Best Blastp Hit: pir   B81117 hypothetical protein NMB1147; NMB1185 [imported] - Neisseria meningitidis (group B strain MD58) >gi 7226384 gb AAF41534.1  (AE002463) hypothetical protein [Neisseria meningitidis MC58] >gi 7226422 gb AAF41569.1  (AE002466) hypothetical protein [Neisseria meningitidis MC58]                                                                                                                                                     |
| NGO0813 | 0.0734 | 3.19  | up   | 0.0526 | 2.22  | up   | 0.3532 | 1.28  | up   | putative biotin synthase\ Context:(NC_002946)-[805845-806897]\ Notes:Best Blastp Hit: pir   A81117 biotin synthetase NMB1146; NMB1184 [imported] - Neisseria meningitidis (group B strain MD58) >gi 7226383 gb AAF41533.1  (AE002463) biotin synthetase [Neisseria meningitidis MC58] >gi 7226421 gb AAF41568.1  (AE002466) biotin synthetase [Neisseria meningitidis MC58] COG0502 Biotin synthase and related enzymes                                                                                                              |
| NGO0814 | 0.9561 | -1.04 | down | 0.9003 | 1.06  | up   | 0.2480 | 1.48  | up   | hypothetical protein\ Context:(NC_002946)-[806915-807067]\ Notes:Best Blastp Hit: emb CAB84603.1  (AL162755) hypothetical protein NMA1357 [Neisseria meningitidis]                                                                                                                                                                                                                                                                                                                                                                   |
| NGO0815 | 0.2544 | 1.69  | up   | 0.2179 | 1.61  | up   | 0.4560 | 1.22  | up   | putative UDP-N-acetylmuramate: L-alanyl-gamma-D-glutamyl-meso-diaminopimelate ligase\ Context:(NC_002946)-[807104-808480]\ Notes:Best Blastp Hit: pir   F81904 probable UDP-N-acetylmuramate:L-alanyl-gamma-D-glutamyl-meso- diaminopimelate ligase (EC 6.3.2. ) NMA1356 [imported] - Neisseria meningitidis (group A strain Z2491) >gi 7380024 emb CAB84602.1  (AL162755) putative UDP-N-acetylmuramate:L-alanyl-gamma-D-glutamyl-meso- diaminopimelate ligase [Neisseria meningitidis] COG0773 UDP-N-acetylmuramate-alanine ligase |

|         |        |       |      |        |       |      |        |       |      |                                                                                                                                                                                                                                                                                                                                                                                                                                                     |
|---------|--------|-------|------|--------|-------|------|--------|-------|------|-----------------------------------------------------------------------------------------------------------------------------------------------------------------------------------------------------------------------------------------------------------------------------------------------------------------------------------------------------------------------------------------------------------------------------------------------------|
| NGO0816 | 0.5061 | 1.40  | up   | 0.9248 | 1.04  | up   | 0.8508 | 1.06  | up   | hypothetical protein\ Context:(NC_002946)-[808542-808847]\ Notes:Best Blastp Hit: pir    G81116 hypothetical protein NMB1144; NMB1182 [imported] - Neisseria meningitidis (group B strain MD58)<br>>gi 7226381 gb AAF41531.1  (AE002463) hypothetical protein [Neisseria meningitidis MC58]<br>>gi 7226419 gb AAF41566.1  (AE002466) hypothetical protein [Neisseria meningitidis MC58]                                                             |
| NGO0818 | 0.1104 | 2.51  | up   | 0.8693 | 1.06  | up   | 0.6732 | 1.19  | up   | hypothetical protein\ Context:(NC_002946)-[809472-809669]\ Notes:Best Blastp Hit: pir    T26843 hypothetical protein Y43F4B.5 - Caenorhabditis elegans<br>>gi 3880930 emb CAA16334.1  (AL021481) contains similarity to Pfam domain: PF00408 (Phosphoglucomutase/phosphomannomutase); Score=3.3; E-value=4.3e-11; N=1 cDNA EST EMBL:M89080 comes from this gene cDNA EST EMBL:T00805 comes from this gene cDNA EST EMBL:T00831 comes from this gen> |
| NGO0819 | 0.5191 | -1.51 | down | 0.3633 | 1.42  | up   | 0.9876 | 1.01  | up   | putative RNA methyltransferase\ Context:(NC_002946)-[809679-810464]\ Notes:Best Blastp Hit: emb CAB84598.1  (AL162755) putative RNA methyltransferase [Neisseria meningitidis] COG0566 rRNA methylases                                                                                                                                                                                                                                              |
| NGO0820 | 0.8782 | -1.17 | down | 0.9825 | -1.01 | down | 0.2613 | -1.62 | down | hypothetical protein\ Context:(NC_002946)-[810538-811818]\ Notes:Best Blastp Hit: possibly phase variable - 8A residue homopolymer repeat in the coding sequence (ON) COG0037 Predicted ATPases of the PP-loop superfamily                                                                                                                                                                                                                          |
| NGO0821 | 0.6430 | 1.26  | up   | 0.7803 | 1.13  | up   | 0.2603 | -1.79 | down | acetyl-CoA carboxylase carboxyltransferase subunit alpha\ Context:(NC_002946)-[811916-812875]\ Notes:catalyzes the carboxylation of acetyl-CoA to malonyl-CoA; forms a tetramer composed of two alpha (AccA) and two beta (AccD) subunits; one of the two catalytic subunits that can form the acetyl CoA carboxylase enzyme together with a carrier protein                                                                                        |

|         |        |      |    |        |      |    |        |      |    |                                                                                                                                                                                                                                                                                                                                                                                                                                                                                                                                                                                            |
|---------|--------|------|----|--------|------|----|--------|------|----|--------------------------------------------------------------------------------------------------------------------------------------------------------------------------------------------------------------------------------------------------------------------------------------------------------------------------------------------------------------------------------------------------------------------------------------------------------------------------------------------------------------------------------------------------------------------------------------------|
| NGO0822 | 0.2017 | 1.82 | up | 0.0306 | 2.37 | up | 0.9774 | 1.01 | up | hypothetical protein\ Context:(NC_002946)+[813087-813488]\ Notes:Best Blastp Hit: pir   A81119 conserved hypothetical protein NMB1138; NMB1176; NMA1348 [imported] - Neisseria meningitidis (group B strain MD58; group A strain Z2491) >gi 7226375 gb AAF41526.1  (AE002462) conserved hypothetical protein [Neisseria meningitidis MC58] >gi 7226413 gb AAF41561.1  (AE002465) conserved hypothetical protein [Neisseria meningitidis MC58] >gi 7380017 emb CAB84595.1  (AL162755) hypothetical protein NMA1348 [Neisseria meningitidis] COG1188 Predicted small RNA-binding protein (S4 |
| NGO0823 | 0.5324 | 1.42 | up | 0.7905 | 1.12 | up | 0.1972 | 1.82 | up | hypothetical protein\ Context:(NC_002946)-[813556-813753]\ Notes:Best Blastp Hit: gb AAF41525.1  (AE002462) conserved hypothetical protein [Neisseria meningitidis MC58] >gi 7226412 gb AAF41560.1  (AE002465) conserved hypothetical protein [Neisseria meningitidis MC58] >gi 7380016 emb CAB84594.1  (AL162755) hypothetical protein NMA1347 [Neisseria meningitidis]                                                                                                                                                                                                                   |
| NGO0825 | 0.4089 | 1.46 | up | 0.0151 | 4.20 | up | 0.7007 | 1.22 | up | putative ferredoxin\ Context:(NC_002946)-[814566-814907]\ Notes:Best Blastp Hit: pir   E81118 ferredoxin [2Fe-2S] NMB1134; NMB1172; NMA1344 [similarity] - Neisseria meningitidis (group B strain MD58; group A strain Z2491) >gi 7226371 gb AAF41522.1  (AE002462) ferredoxin; 2Fe-2S type [Neisseria meningitidis MC58] >gi 7226409 gb AAF41557.1  (AE002465) ferredoxin; 2Fe-2S type [Neisseria meningitidis MC58] >gi 7380014 emb CAB84592.1  (AL162755) putative ferredoxin [Neisseria meningitidis] COG0633 Ferredoxin                                                               |
| NGO0826 | 0.1808 | 2.10 | up | 0.0115 | 3.40 | up | 0.0542 | 2.18 | up | hypothetical protein\ Context:(NC_002946)-[814963-815721]\ Notes:Best Blastp Hit: emb CAB84591.1  (AL162755) hypothetical protein NMA1343 [Neisseria meningitidis]                                                                                                                                                                                                                                                                                                                                                                                                                         |
| NGO0827 | 0.1032 | 2.18 | up | 0.0818 | 1.99 | up | 0.2837 | 2.00 | up | hypothetical protein\ Context:(NC_002946)-[815760-816323]\ Notes:Best Blastp Hit: emb CAB84590.1  (AL162755) hypothetical protein NMA1341 [Neisseria meningitidis]                                                                                                                                                                                                                                                                                                                                                                                                                         |

|         |        |       |      |        |       |      |        |       |      |                                                                                                                                                                                                                                                                                                                                                                                                                                                         |
|---------|--------|-------|------|--------|-------|------|--------|-------|------|---------------------------------------------------------------------------------------------------------------------------------------------------------------------------------------------------------------------------------------------------------------------------------------------------------------------------------------------------------------------------------------------------------------------------------------------------------|
| NGO0828 | 0.0182 | 6.70  | up   | 0.0250 | 13.35 | up   | 0.0456 | 3.58  | up   | hypothetical protein\ Context:(NC_002946)-[816373-816519]\ Notes:Best Blastp Hit: gb AAF41523.1  (AE002462) hypothetical protein [Neisseria meningitidis MC58] >gi 7226410 gb AAF41558.1  (AE002465) hypothetical protein [Neisseria meningitidis MC58]                                                                                                                                                                                                 |
| NGO0829 | 0.0144 | 3.93  | up   | 0.0393 | 5.26  | up   | 0.0509 | 1.99  | up   | chaperone protein HscA\ Context:(NC_002946)-[816596-818458]\ Notes:involved in the maturation of iron-sulfur cluster-containing proteins                                                                                                                                                                                                                                                                                                                |
| NGO0830 | 0.3433 | -1.59 | down | 0.0637 | -2.58 | down | 0.1006 | -1.95 | down | putative poly-isoprenyl transferase\ Context:(NC_002946)+[818629-819501]\ Notes:Best Blastp Hit: pir A81118 phytoene synthase; probable NMB1130; NMB1168 [imported] - Neisseria meningitidis (group B strain MD58) >gi 7226367 gb AAF41518.1  (AE002462) phytoene synthase; putative [Neisseria meningitidis MC58] >gi 7226405 gb AAF41553.1  (AE002465) phytoene synthase; putative [Neisseria meningitidis MC58] COG1562 Phytoene/squalene synthetase |
| NGO0831 | 0.1088 | -2.95 | down | 0.1872 | -2.07 | down | 0.8788 | -1.08 | down | putative oxidoreductase\ Context:(NC_002946)+[819576-820949]\ Notes:Best Blastp Hit: gb AAF41516.1  (AE002462) conserved hypothetical protein [Neisseria meningitidis MC58] >gi 7226403 gb AAF41551.1  (AE002465) conserved hypothetical protein [Neisseria meningitidis MC58]                                                                                                                                                                          |
| NGO0832 | 0.8727 | 1.09  | up   | 0.8639 | -1.08 | down | 0.8591 | 1.06  | up   | short chain dehydrogenase\ Context:(NC_002946)+[820972-821691]\ Notes:Best Blastp Hit: emb CAB84586.1  (AL162755) putative oxidoreductase [Neisseria meningitidis] COG1028 Dehydrogenases with different specificities                                                                                                                                                                                                                                  |
| NGO0834 | 0.8852 | -1.08 | down | 0.7952 | -1.14 | down | 0.6618 | -1.18 | down | hypothetical protein\ Context:(NC_002946)+[821857-822528]\ Notes:Best Blastp Hit: gb AAF41514.1  (AE002461) hypothetical protein [Neisseria meningitidis MC58] >gi 7226400 gb AAF41549.1  (AE002464) hypothetical protein [Neisseria meningitidis MC58] >gi 7380007 emb CAB84585.1  (AL162755) putative periplasmic protein [Neisseria meningitidis] COG1462 Uncharacterized protein CsgG involved                                                      |

|         |        |        |      |        |         |      |        |        |      |                                                                                                                                                                                                                                                                                                                                                 |
|---------|--------|--------|------|--------|---------|------|--------|--------|------|-------------------------------------------------------------------------------------------------------------------------------------------------------------------------------------------------------------------------------------------------------------------------------------------------------------------------------------------------|
| NGO0835 | 0.4859 | -1.48  | down | 0.5471 | -1.30   | down | 0.6939 | -1.12  | down | GNA1162\ Context:(NC_002946)+[822902-823549]\ Notes:Best Blastp Hit: gb AAF44774.1 AF235157_1 (AF235157) GNA1162 [Neisseria gonorrhoeae] >gi 7274440 gb AAF44775.1 AF235158_1 (AF235158) GNA1162 [Neisseria gonorrhoeae] >gi 7274442 gb AAF44776.1 AF235159_1 (AF235159) GNA1162 [Neisseria gonorrhoeae]; genome-derived Neisseria antigen 1162 |
| NGO0836 | 0.0531 | -4.62  | down | 0.1861 | -6.48   | down | 0.2752 | 2.85   | up   | hypothetical protein\ Context:(NC_002946)+[823589-823732]\ Notes:Best Blastp Hit: gb AAF41511.1  (AE002461) hypothetical protein [Neisseria meningitidis MC58] >gi 7226397 gb AAF41546.1  (AE002464) hypothetical protein [Neisseria meningitidis MC58]                                                                                         |
| NGO0841 | 0.5680 | -1.33  | down | 0.4118 | -1.46   | down | 0.7561 | -1.10  | down | hypothetical protein\ Context:(NC_002946)+[825812-826480]\ Notes:Best Blastp Hit: pir   B81896 hypothetical protein NMA1279 [imported] - Neisseria meningitidis (group A strain Z2491) >gi 7379956 emb CAB84531.1  (AL162755) hypothetical protein NMA1279 [Neisseria meningitidis] COG0593 ATPase involved in DNA replication                  |
| NGO0842 | 0.8490 | -1.15  | down | 0.8854 | 1.06    | up   | 0.8973 | -1.05  | down | hypothetical protein\ Context:(NC_002946)+[826477-827145]\ Notes:Best Blastp Hit: emb CAB84530.1  (AL162755) hypothetical protein NMA1278 [Neisseria meningitidis] COG0560 Phosphoserine phosphatase                                                                                                                                            |
| NGO0843 | 0.0006 | -48.89 | down | 0.0001 | -165.28 | down | 0.0000 | -59.40 | down | hypothetical protein\ Context:(NC_002946)-[827290-827577]\ Notes:                                                                                                                                                                                                                                                                               |
| NGO0844 | 0.0022 | -8.38  | down | 0.0052 | -6.57   | down | 0.0004 | -9.41  | down | acetylglutamate kinase\ Context:(NC_002946)-[827592-828488]\ Notes:catalyzes the phosphorylation of N-acetyl-L-glutamate to form N-acetyl-L-glutamate 5-phosphate                                                                                                                                                                               |
| NGO0845 | 0.5066 | 1.38   | up   | 0.6858 | -1.17   | down | 0.3180 | 1.30   | up   | hypothetical protein\ Context:(NC_002946)+[828658-829788]\ Notes:Best Blastp Hit: pir   F81895 hypothetical protein NMA1274 [imported] - Neisseria meningitidis (group A strain Z2491) >gi 7379952 emb CAB84527.1  (AL162755) hypothetical protein NMA1274 [Neisseria meningitidis]                                                             |

|         |        |        |      |        |        |      |        |        |      |                                                                                                                                                                                                                                                                                                                                                                                   |
|---------|--------|--------|------|--------|--------|------|--------|--------|------|-----------------------------------------------------------------------------------------------------------------------------------------------------------------------------------------------------------------------------------------------------------------------------------------------------------------------------------------------------------------------------------|
| NGO0846 | 0.0240 | 3.61   | up   | 0.1538 | 2.25   | up   | 0.8114 | 1.15   | up   | prolipoprotein diacylglyceryl transferase\<br>Context:(NC_002946)+[829862-830713]\ Notes:transfers<br>the N-acyl diglyceride moiety to the prospective N-terminal<br>cysteine in prolipoprotein                                                                                                                                                                                   |
| NGO0847 | 0.5409 | 1.35   | up   | 0.9778 | 1.01   | up   | 0.7762 | -1.08  | down | hypothetical protein\<br>Context:(NC_002946)-[830798-<br>831460]\ Notes:Best Blastp Hit: gb AAF41466.1 <br>(AE002457) conserved hypothetical protein [Neisseria<br>meningitidis MC58]                                                                                                                                                                                             |
| NGO0848 | 0.7825 | -1.13  | down | 0.8756 | -1.07  | down | 0.2750 | -1.56  | down | 2-isopropylmalate synthase\<br>Context:(NC_002946)-[831659-<br>833212]\ Notes:catalyzes the formation of 2-<br>isopropylmalate from acetyl-CoA and 2-oxoisovalerate in<br>leucine biosynthesis                                                                                                                                                                                    |
| NGO0850 | 0.0003 | -21.60 | down | 0.0015 | -21.58 | down | 0.0281 | -4.03  | down | gamma-glutamyl phosphate reductase\<br>Context:(NC_002946)+[834819-836081]\ Notes:Catalyzes<br>the phosphorylation of L-glutamate during the proline<br>biosynthesis pathway                                                                                                                                                                                                      |
| NGO0851 | 0.8302 | -1.15  | down | 0.0369 | -3.21  | down | 0.7142 | -1.16  | down | putative cell-division protein\<br>Context:(NC_002946)-<br>[836257-839301]\ Notes:Best Blastp Hit: pir   E81125 cell<br>division protein FtsK NMB1067 [imported] - Neisseria<br>meningitidis (group B strain MD58)<br>>gi 7226307 gb AAF41463.1  (AE002457) cell division<br>protein FtsK [Neisseria meningitidis MC58] COG1674 DNA<br>segregation ATPase FtsK/SpoIIIE and        |
| NGO0852 | 0.5146 | -1.57  | down | 0.0063 | -5.27  | down | 0.2745 | -1.86  | down | hypothetical protein\<br>Context:(NC_002946)+[839467-<br>840147]\ Notes:Best Blastp Hit: pir   G81894 probable<br>integral membrane protein NMA1265 [imported] -<br>Neisseria meningitidis (group A strain Z2491)<br>>gi 7379945 emb CAB84520.1  (AL162755) putative<br>integral membrane protein [Neisseria meningitidis]                                                        |
| NGO0853 | 0.7463 | 1.24   | up   | 0.1578 | -3.58  | down | 0.4446 | 2.38   | up   | hypothetical protein\<br>Context:(NC_002946)+[840176-<br>840535]\ Notes:Best Blastp Hit: pir   F81894 probable<br>integral membrane protein NMA1264 [imported] -<br>Neisseria meningitidis (group A strain Z2491)<br>>gi 7379944 emb CAB84519.1  (AL162755) putative<br>integral membrane protein [Neisseria meningitidis]<br>COG0239 Integral membrane protein possibly involved |
| NGO0854 | 0.0334 | -32.31 | down | 0.0644 | -13.67 | down | 0.0824 | -28.36 | down | hypothetical protein\<br>Context:(NC_002946)-[840823-<br>840960]\ Notes:                                                                                                                                                                                                                                                                                                          |

|         |        |        |      |        |        |      |        |       |      |                                                                                                                                                                                                                                                                                                                                         |
|---------|--------|--------|------|--------|--------|------|--------|-------|------|-----------------------------------------------------------------------------------------------------------------------------------------------------------------------------------------------------------------------------------------------------------------------------------------------------------------------------------------|
| NGO0857 | 0.3054 | 1.77   | up   | 0.9594 | -1.02  | down | 0.7658 | -1.09 | down | putative dihydroneopterin aldolase\ Context:(NC_002946)-[841711-842067]\ Notes:Best Blastp Hit: pir   A81127 dihydroneopterin aldolase NMB1063 [imported] - Neisseria meningitidis (group B strain MD58) >gi 7226302 gb AAF41459.1  (AE002456) dihydroneopterin aldolase [Neisseria meningitidis MC58] COG1539 Dihyroneopterin aldolase |
| NGO0858 | 0.0067 | -13.37 | down | 0.0073 | -8.15  | down | 0.0656 | -2.08 | down | hypothetical protein\ Context:(NC_002946)+[842123-842725]\ Notes:Best Blastp Hit: possibly phase variable - 8A residue homopolymer repeat in the coding sequence (ON) COG0344 Predicted membrane protein; YgiH/UPF0078                                                                                                                  |
| NGO0859 | 0.0193 | -6.11  | down | 0.0020 | -26.41 | down | 0.3161 | -2.18 | down | hypothetical protein\ Context:(NC_002946)+[842817-843662]\ Notes:Best Blastp Hit: pir   G81126 conserved hypothetical protein NMB1061 [imported] - Neisseria meningitidis (group B strain MD58) >gi 7226300 gb AAF41457.1  (AE002456) conserved hypothetical protein [Neisseria meningitidis MC58]                                      |
| NGO0860 | 0.5176 | -1.33  | down | 0.0241 | -10.96 | down | 0.6862 | -1.24 | down | hypothetical protein\ Context:(NC_002946)+[843668-844126]\ Notes:                                                                                                                                                                                                                                                                       |
| NGO0861 | 0.1400 | 2.34   | up   | 0.2820 | 1.55   | up   | 0.3316 | 1.36  | up   | hypothetical protein\ Context:(NC_002946)-[844152-844400]\ Notes:                                                                                                                                                                                                                                                                       |
| NGO0862 | 0.1635 | -2.02  | down | 0.8176 | 1.16   | up   | 0.5034 | -1.20 | down | fructose-1,6-bisphosphatase\ Context:(NC_002946)+[844641-845615]\ Notes:catalyzes the formation of D-fructose 6-phosphate from fructose-1,6-bisphosphate                                                                                                                                                                                |
| NGO0863 | 0.1716 | 2.38   | up   | 0.2598 | 1.61   | up   | 0.5140 | 1.32  | up   | hypothetical protein\ Context:(NC_002946)-[845774-845992]\ Notes:Best Blastp Hit: gb AAF41455.1  (AE002456) conserved hypothetical protein [Neisseria meningitidis MC58] >gi 7379938 emb CAB84513.1  (AL162755) hypothetical protein NMA1258 [Neisseria meningitidis]                                                                   |
| NGO0865 | 0.1619 | 2.09   | up   | 0.2347 | 1.62   | up   | 0.7588 | 1.09  | up   | hypothetical protein\ Context:(NC_002946)+[848531-848773]\ Notes:Best Blastp Hit: gb AAF41453.1  (AE002456) hypothetical protein [Neisseria meningitidis MC58]                                                                                                                                                                          |
| NGO0866 | 0.7343 | 1.18   | up   | 0.8496 | 1.09   | up   | 0.5696 | 1.18  | up   | serine hydroxymethyltransferase\ Context:(NC_002946)+[848840-850090]\ Notes:catalyzes the reaction of glycine with 5,10-methylenetetrahydrofolate to form L-serine and tetrahydrofolate                                                                                                                                                 |

|         |        |       |      |        |        |      |        |       |      |                                                                                                                                                                                                                                                                                                                                                                                                                                       |
|---------|--------|-------|------|--------|--------|------|--------|-------|------|---------------------------------------------------------------------------------------------------------------------------------------------------------------------------------------------------------------------------------------------------------------------------------------------------------------------------------------------------------------------------------------------------------------------------------------|
| NGO0867 | 0.0181 | 4.38  | up   | 0.7836 | 1.18   | up   | 0.1308 | 1.71  | up   | hypothetical protein\ Context:(NC_002946)-[850163-850552]\ Notes:Best Blastp Hit: pir    F81234 conserved hypothetical protein NMB0121 [imported] - Neisseria meningitidis (group B strain MD58)<br>>gi 7225338 gb AAF40580.1  (AE002371) conserved hypothetical protein [Neisseria meningitidis MC58]                                                                                                                                |
| NGO0868 | 0.1476 | -2.54 | down | 0.0174 | -10.27 | down | 0.5902 | -2.03 | down | OpcA\ Context:(NC_002946)+[851492-852283]\ Notes:Best Blastp Hit: emb CAB45007.1  (AJ242839) OpcA protein [Neisseria gonorrhoeae]; class 5 outer membrane protein                                                                                                                                                                                                                                                                     |
| NGO0869 | 0.0193 | -6.80 | down | 0.0501 | -4.79  | down | 0.4218 | -2.07 | down | hypothetical protein\ Context:(NC_002946)+[852434-853078]\ Notes:Best Blastp Hit: pir    D81128 dedA protein NMB1052 [imported] - Neisseria meningitidis (group B strain MD58; group A strain Z2491)<br>>gi 7226292 gb AAF41450.1  (AE002455) dedA protein [Neisseria meningitidis MC58]<br>>gi 7379932 emb CAB84505.1  (AL162755) DedA protein ortholog [Neisseria meningitidis] COG0586 Uncharacterized membrane-associated protein |
| NGO0870 | 0.6561 | -1.22 | down | 0.5899 | -1.19  | down | 0.4889 | 1.25  | up   | AbcZ\ Context:(NC_002946)+[853097-855007]\ Notes:Best Blastp Hit: emb CAB45011.1  (AJ242839) putative ATP-binding protein [Neisseria gonorrhoeae] COG0488 ATPase components of ABC transporters with; putative ABC-type transporter; ATP-binding protein                                                                                                                                                                              |
| NGO0871 | 0.0061 | -7.35 | down | 0.0018 | -12.05 | down | 0.3385 | -2.13 | down | hypothetical protein\ Context:(NC_002946)+[855029-855358]\ Notes:Best Blastp Hit: emb CAB45013.1  (AJ242839) hypothetical protein [Neisseria gonorrhoeae]                                                                                                                                                                                                                                                                             |
| NGO0872 | 0.2759 | 1.99  | up   | 0.0891 | 6.09   | up   | 0.0809 | 4.28  | up   | anthranilate synthase component I\ Context:(NC_002946)+[855507-856982]\ Notes:with component II; the glutamine amidotransferase; catalyzes the formation of anthranilate from chorismate and glutamine                                                                                                                                                                                                                                |
| NGO0873 | 0.0419 | 4.14  | up   | 0.0310 | 25.53  | up   | 0.0648 | 10.36 | up   | DNA modification methylase M.NGOI\ Context:(NC_002946)+[857066-858004]\ Notes:Best Blastp Hit: emb CAB44950.1  (AJ242840) DNA modification methylase [Neisseria gonorrhoeae]<br>>gi 5262959 emb CAB45015.2  (AJ242839) DNA modification methylase [Neisseria gonorrhoeae] COG0270 Site-specific DNA methylase dcm; DcmD                                                                                                               |



|         |        |        |      |        |       |      |        |       |      |                                                                                                                                                                                                                                                                                                                                                                                                                                                                                                                      |
|---------|--------|--------|------|--------|-------|------|--------|-------|------|----------------------------------------------------------------------------------------------------------------------------------------------------------------------------------------------------------------------------------------------------------------------------------------------------------------------------------------------------------------------------------------------------------------------------------------------------------------------------------------------------------------------|
| NGO0874 | 0.2754 | 1.87   | up   | 0.0345 | 6.22  | up   | 0.1109 | 4.24  | up   | type II DNA restriction endonuclease R.NGOI\<br>Context:(NC_002946)+[858005-858865]\ Notes:Best Blastp<br>Hit: sp P31032 T2NM_NEIGO type II restriction enzyme<br>NgoI (endonuclease NgomI) (R.NGOMI)<br>>gi 281723 pir   B42709 DNA restriction endonuclease<br>NgoMI - Neisseria gonorrhoeae<br>>gi 5051443 emb CAB44951.1  (AJ242840) putative DNA<br>restriction endonuclease [Neisseria gonorrhoeae]<br>>gi 5262960 emb CAB45874.1  (AJ242839) putative DNA<br>restriction endonuclease [Neisseria gonorrhoeae] |
| NGO0875 | 0.0019 | 15.61  | up   | 0.1132 | 5.96  | up   | 0.3816 | 1.79  | up   | phosphoribosylaminoimidazole carboxylase ATPase<br>subunit\ Context:(NC_002946)+[858882-860018]\<br>Notes:With PurE catalyzes the conversion of<br>aminoimidazole ribonucleotide to carboxyaminoimidazole<br>ribonucleotide in the de novo purine nucleotide<br>biosynthetic pathway                                                                                                                                                                                                                                 |
| NGO0876 | 0.5439 | -1.43  | down | 0.6920 | -1.35 | down | 0.2126 | -2.26 | down | hypothetical protein\ Context:(NC_002946)+[860065-<br>860547]\ Notes:Best Blastp Hit: gb AAF41418.1 <br>(AE002452) conserved hypothetical protein [Neisseria<br>meningitidis MC58] COG0454 Predicted acetyltransferases                                                                                                                                                                                                                                                                                              |
| NGO0878 | 0.5114 | 1.55   | up   | 0.9595 | 1.05  | up   | 0.3696 | -1.81 | down | hypothetical protein\ Context:(NC_002946)+[861698-<br>861901]\ Notes:Best Blastp Hit: dbj BAA82522.1 <br>(AB030007) tunicate retinoic acid-inducible modular<br>protease [Polyandrocampa misakiensis]                                                                                                                                                                                                                                                                                                                |
| NGO0879 | 0.6654 | -1.40  | down | 0.0274 | -3.39 | down | 0.6149 | -1.54 | down | hypothetical protein\ Context:(NC_002946)-[861993-<br>862184]\ Notes:                                                                                                                                                                                                                                                                                                                                                                                                                                                |
| NGO0880 | 0.0005 | -17.91 | down | 0.0028 | -5.24 | down | 0.3225 | -2.70 | down | hypothetical protein\ Context:(NC_002946)+[862282-<br>862887]\ Notes:Best Blastp Hit: pir   B81892 hypothetical<br>protein NMA1237 [imported] - Neisseria meningitidis<br>(group A strain Z2491) >gi 7379924 emb CAB84495.1 <br>(AL162755) hypothetical protein NMA1237 [Neisseria<br>meningitidis]                                                                                                                                                                                                                  |
| NGO0883 | 0.0823 | 3.38   | up   | 0.7612 | -1.72 | down | 0.6398 | -3.05 | down | hypothetical protein\ Context:(NC_002946)+[864823-<br>865149]\ Notes:                                                                                                                                                                                                                                                                                                                                                                                                                                                |

|         |        |        |      |        |        |      |        |       |      |                                                                                                                                                                                                                                                                                                                                                                                               |
|---------|--------|--------|------|--------|--------|------|--------|-------|------|-----------------------------------------------------------------------------------------------------------------------------------------------------------------------------------------------------------------------------------------------------------------------------------------------------------------------------------------------------------------------------------------------|
| NGO0885 | 0.3050 | -1.72  | down | 0.1430 | -3.99  | down | 0.7288 | -1.43 | down | putative rubredoxin\ Context:(NC_002946)-[865554-865724]\ Notes:Best Blastp Hit: pir    H81133 rubredoxin NMB0993 [imported] - Neisseria meningitidis (group B strain MD58; group A strain Z2491)<br>>gi 7226233 gb AAF41396.1  (AE002450) rubredoxin [Neisseria meningitidis MC58]<br>>gi 7379892 emb CAB84462.1  (AL162755) putative rubredoxin [Neisseria meningitidis] COG1773 Rubredoxin |
| NGO0886 | 0.0022 | -13.59 | down | 0.0092 | -32.72 | down | 0.4235 | -2.11 | down | putative acyl-CoA dehydrogenase\ Context:(NC_002946)-[865857-866939]\ Notes:Best Blastp Hit: emb CAB84463.1  (AL162755) putative acyl-CoA dehydrogenase [Neisseria meningitidis] COG1960 Acyl-CoA dehydrogenases                                                                                                                                                                              |
| NGO0887 | 0.5297 | 1.59   | up   | 0.3639 | -2.43  | down | 0.2264 | -2.14 | down | hypothetical protein\ Context:(NC_002946)-[867077-867625]\ Notes:Best Blastp Hit: emb CAB84464.1  (AL162755) hypothetical protein NMA1203 [Neisseria meningitidis]                                                                                                                                                                                                                            |
| NGO0888 | 0.0250 | -4.28  | down | 0.0029 | -5.62  | down | 0.3069 | -2.33 | down | hypothetical protein\ Context:(NC_002946)-[867765-868025]\ Notes:Best Blastp Hit: gb AAF41399.1  (AE002450) hypothetical protein [Neisseria meningitidis MC58] >gi 7379895 emb CAB84465.1  (AL162755) hypothetical protein NMA1204 [Neisseria meningitidis]                                                                                                                                   |
| NGO0889 | 0.0878 | 2.69   | up   | 0.6614 | -1.64  | down | 0.3189 | 2.70  | up   | hypothetical protein\ Context:(NC_002946)+[868110-868271]\ Notes:                                                                                                                                                                                                                                                                                                                             |
| NGO0890 | 0.9129 | 1.05   | up   | 0.7252 | -1.17  | down | 0.9752 | -1.01 | down | D-lactate dehydrogenase\ Context:(NC_002946)-[868321-870012]\ Notes:component of the membrane-bound D-lactate oxidase; FAD-binding; NADH independent                                                                                                                                                                                                                                          |
| NGO0891 | 0.3315 | -1.65  | down | 0.3136 | -1.80  | down | 0.1050 | -1.79 | down | hypothetical protein\ Context:(NC_002946)-[870109-870528]\ Notes:Best Blastp Hit: pir    S52906 virion protein j13L - African swine fever virus<br>>gi 695432 emb CAA59319.1  (X84893) j13L [African swine fever virus]                                                                                                                                                                       |
| NGO0892 | 0.1461 | -2.98  | down | 0.0002 | -53.52 | down | 0.3056 | -1.88 | down | hypothetical protein\ Context:(NC_002946)+[870645-870926]\ Notes:                                                                                                                                                                                                                                                                                                                             |

|         |        |       |      |        |        |      |        |       |      |                                                                                                                                                                                                                                                                                                                                           |
|---------|--------|-------|------|--------|--------|------|--------|-------|------|-------------------------------------------------------------------------------------------------------------------------------------------------------------------------------------------------------------------------------------------------------------------------------------------------------------------------------------------|
| NGO0893 | 0.0158 | -5.17 | down | 0.0250 | -4.49  | down | 0.2013 | -2.00 | down | putative oxidoreductase\ Context:(NC_002946)+[871108-874941]\ Notes:Best Blastp Hit: emb CAB84467.1  (AL162755) putative oxidoreductase [Neisseria meningitidis] COG0247 Fe-S oxidoreductases                                                                                                                                             |
| NGO0894 | 0.6461 | -1.46 | down | 0.0426 | -11.95 | down | 0.0437 | -3.21 | down | hypothetical protein\ Context:(NC_002946)+[875018-876019]\ Notes:Best Blastp Hit: pir   H81888 hypothetical protein NMA1207 [imported] - Neisseria meningitidis (group A strain Z2491) >gi 7379898 emb CAB84468.1  (AL162755) hypothetical protein NMA1207 [Neisseria meningitidis] COG0042 Predicted TIM-barrel enzymes; possibly        |
| NGO0895 | 0.2456 | 1.82  | up   | 0.1300 | 1.97   | up   | 0.0732 | 2.48  | up   | hypothetical protein\ Context:(NC_002946)-[876080-876262]\ Notes:Best Blastp Hit: emb CAB84469.1  (AL162755) hypothetical protein NMA1208 [Neisseria meningitidis]                                                                                                                                                                        |
| NGO0896 | 0.1751 | -2.88 | down | 0.2579 | 3.35   | up   | 0.5683 | 2.02  | up   | hypothetical protein\ Context:(NC_002946)-[876435-876566]\ Notes:                                                                                                                                                                                                                                                                         |
| NGO0897 | 0.0569 | -3.61 | down | 0.0988 | -4.65  | down | 0.6719 | -1.33 | down | hypothetical protein\ Context:(NC_002946)+[876614-876778]\ Notes:                                                                                                                                                                                                                                                                         |
| NGO0899 | 0.5671 | -1.33 | down | 0.2245 | -2.06  | down | 0.8625 | -1.09 | down | hypothetical protein\ Context:(NC_002946)-[878296-878772]\ Notes:Best Blastp Hit: pir   G81858 transcription elongation factor NMA1643 [imported] - Neisseria meningitidis (group A strain Z2491) >gi 7380285 emb CAB84871.1  (AL162756) transcription elongation factor [Neisseria meningitidis] COG0782 Transcription elongation factor |
| NGO0900 | 0.6365 | 1.30  | up   | 0.7196 | -1.23  | down | 0.4309 | 1.59  | up   | 3-phosphoshikimate 1-carboxyvinyltransferase\ Context:(NC_002946)+[879163-880464]\ Notes:catalyzes the formation of 5-O-(1-carboxyvinyl)-3-phosphoshikimate from phosphoenolpyruvate and 3-phosphoshikimate in tryptophan biosynthesis                                                                                                    |
| NGO0901 | 0.2165 | -2.23 | down | 0.0589 | -10.51 | down | 0.1491 | -2.69 | down | putative lipoprotein\ Context:(NC_002946)-[880542-881075]\ Notes:Best Blastp Hit: emb CAB84873.1  (AL162756) putative lipoprotein [Neisseria meningitidis] COG0791 Cell wall-associated hydrolases                                                                                                                                        |

|         |        |        |      |        |        |      |        |       |      |                                                                                                                                                                                                                                                                                                                                                                                       |
|---------|--------|--------|------|--------|--------|------|--------|-------|------|---------------------------------------------------------------------------------------------------------------------------------------------------------------------------------------------------------------------------------------------------------------------------------------------------------------------------------------------------------------------------------------|
| NGO0902 | 0.2068 | 2.14   | up   | 0.3757 | -2.42  | down | 0.7839 | -1.30 | down | putative phospholipase D-family protein\<br>Context:(NC_002946)-[881132-882709]\ Notes:Best Blastp Hit: emb CAB84874.1  (AL162756) phospholipase D-family protein [Neisseria meningitidis] COG1502 Cardiolipin synthase; phosphatidylserine                                                                                                                                           |
| NGO0903 | 0.0113 | -10.47 | down | 0.0247 | -31.07 | down | 0.5253 | -1.41 | down | AgrA\<br>Context:(NC_002946)-[882770-884176]\ Notes:Best Blastp Hit: emb CAB84875.1  (AL162756) putative integral membrane protein [Neisseria meningitidis] COG0477 Permeases; aminoglycoside resistance efflux transporter protein                                                                                                                                                   |
| NGO0904 | 0.4539 | -1.41  | down | 0.0740 | -2.36  | down | 0.0584 | -1.83 | down | hypothetical protein\<br>Context:(NC_002946)+[884459-885238]\ Notes:Best Blastp Hit: pir   D81859 conserved hypothetical protein NMA1648 [imported] - Neisseria meningitidis (group A strain Z2491)<br>>gi 7380290 emb CAB84876.1  (AL162756) conserved hypothetical protein [Neisseria meningitidis] COG0247 Fe-S oxidoreductases                                                    |
| NGO0905 | 0.1584 | -2.00  | down | 0.0477 | -2.49  | down | 0.0800 | -1.82 | down | hypothetical protein\<br>Context:(NC_002946)+[885235-885936]\ Notes:Best Blastp Hit: emb CAB84877.1  (AL162756) conserved hypothetical protein [Neisseria meningitidis] COG1556 Uncharacterized ACR; YkgG family                                                                                                                                                                      |
| NGO0906 | 0.0852 | -2.63  | down | 0.0460 | -2.05  | down | 0.0799 | -2.28 | down | hypothetical protein\<br>Context:(NC_002946)+[885933-887387]\ Notes:Best Blastp Hit: pir   F81859 conserved hypothetical iron-sulfur protein NMA1650 [similarity] - Neisseria meningitidis (group A strain Z2491)<br>>gi 7380292 emb CAB84878.1  (AL162756) conserved hypothetical iron-sulphur protein [Neisseria meningitidis] COG1139 Uncharacterized conserved protein containing |
| NGO0907 | 0.6598 | 1.85   | up   | 0.8099 | -1.44  | down | 0.9812 | 1.03  | up   | FitB\<br>Context:(NC_002946)-[887536-887955]\ Notes:Best Blastp Hit: gb AAF19189.1 AF200716_2 (AF200716) trafficking protein B [Neisseria gonorrhoeae]                                                                                                                                                                                                                                |
| NGO0908 | 0.9576 | -1.03  | down | 0.7627 | 1.15   | up   | 0.7666 | 1.19  | up   | FitA\<br>Context:(NC_002946)-[887955-888191]\ Notes:Best Blastp Hit: gb AAF19188.1 AF200716_1 (AF200716) trafficking protein A [Neisseria gonorrhoeae]                                                                                                                                                                                                                                |

|         |        |       |      |        |       |      |        |       |      |                                                                                                                                                                                                                                                                                                                                                                                                                                                                                                                                                   |
|---------|--------|-------|------|--------|-------|------|--------|-------|------|---------------------------------------------------------------------------------------------------------------------------------------------------------------------------------------------------------------------------------------------------------------------------------------------------------------------------------------------------------------------------------------------------------------------------------------------------------------------------------------------------------------------------------------------------|
| NGO0912 | 0.9358 | -1.04 | down | 0.8325 | -1.08 | down | 0.8195 | 1.10  | up   | succinyl-CoA synthetase subunit alpha\<br>Context:(NC_002946)-[890632-891522]\ Notes:Catalyzes the only substrate-level phosphorylation in the TCA cycle                                                                                                                                                                                                                                                                                                                                                                                          |
| NGO0913 | 0.4680 | 1.53  | up   | 0.5766 | 1.20  | up   | 0.5443 | 1.27  | up   | succinyl-CoA synthetase subunit beta\<br>Context:(NC_002946)-[891533-892699]\ Notes:catalyzes the interconversion of succinyl-CoA and succinate                                                                                                                                                                                                                                                                                                                                                                                                   |
| NGO0914 | 0.5677 | 1.35  | up   | 0.8928 | 1.05  | up   | 0.9837 | 1.01  | up   | hypothetical protein\<br>Context:(NC_002946)-[892771-893058]\ Notes:Best Blastp Hit: gb AAF41364.1  (AE002447) hypothetical protein [Neisseria meningitidis MC58] >gi 7379845 emb CAB84414.1  (AL162755) putative membrane protein [Neisseria meningitidis]                                                                                                                                                                                                                                                                                       |
| NGO0915 | 0.7294 | -1.20 | down | 0.5676 | -1.24 | down | 0.6211 | -1.17 | down | dihydrolipoamide dehydrogenase\<br>Context:(NC_002946)-[893178-894611]\ Notes:E3 component of 2-oxoglutarate dehydrogenase complex; catalyzes the oxidation of dihydrolipoamide to lipoamide                                                                                                                                                                                                                                                                                                                                                      |
| NGO0916 | 0.5010 | 1.62  | up   | 0.1472 | 3.31  | up   | 0.3041 | 1.73  | up   | dihydrolipoamide acetyltransferase\<br>Context:(NC_002946)-[894872-896053]\ Notes:component of 2-oxoglutarate dehydrogenase complex; catalyzes the transfer of acetyl from acetyldihydrolipoamide to coenzyme A to form acetyl CoA as part of the conversion of 2-oxoglutarate to succinyl-CoA                                                                                                                                                                                                                                                    |
| NGO0917 | 0.7939 | 1.25  | up   | 0.1785 | 5.60  | up   | 0.3877 | 1.51  | up   | alpha-ketoglutarate decarboxylase\<br>Context:(NC_002946)-[896153-898981]\ Notes:kgd; produces succinic semialdehyde; part of alternative pathway from alpha-ketoglutarate to succinate; essential for normal growth                                                                                                                                                                                                                                                                                                                              |
| NGO0918 | 0.7541 | -1.21 | down | 0.6410 | -1.19 | down | 0.3545 | -1.35 | down | type II citrate synthase\<br>Context:(NC_002946)-[899186-900469]\ Notes:type II enzyme; in Escherichia coli this enzyme forms a trimer of dimers which is allosterically inhibited by NADH and competitively inhibited by alpha-ketoglutarate; allosteric inhibition is lost when Cys206 is chemically modified which also affects hexamer formation; forms oxaloacetate and acetyl-CoA and water from citrate and coenzyme A; functions in TCA cycle; glyoxylate cycle and respiration; enzyme from Helicobacter pylori is not inhibited by NADH |

|         |        |       |      |        |       |      |        |       |      |                                                                                                                                                                                                                                                                                                                                                                                                                                                                                                                                          |
|---------|--------|-------|------|--------|-------|------|--------|-------|------|------------------------------------------------------------------------------------------------------------------------------------------------------------------------------------------------------------------------------------------------------------------------------------------------------------------------------------------------------------------------------------------------------------------------------------------------------------------------------------------------------------------------------------------|
| NGO0919 | 0.9944 | 1.00  | up   | 0.9549 | -1.02 | down | 0.1475 | -1.65 | down | hypothetical protein\ Context:(NC_002946)-[900581-900829]\ Notes:Best Blastp Hit: gb AAF41358.1 (AE002446) conserved hypothetical protein [Neisseria meningitidis MC58] >gi 7379840 emb CAB84409.1 (AL162755) hypothetical protein NMA1147 [Neisseria meningitidis]                                                                                                                                                                                                                                                                      |
| NGO0920 | 0.2032 | -1.95 | down | 0.3359 | -1.50 | down | 0.0458 | -1.94 | down | succinate dehydrogenase iron-sulfur subunit\ Context:(NC_002946)-[900833-901561]\ Notes:part of four member succinate dehydrogenase enzyme complex that forms a trimeric complex (trimer of tetramers); SdhA/B are the catalytic subcomplex and can exhibit succinate dehydrogenase activity in the absence of SdhC/D which are the membrane components and form cytochrome b556; SdhC binds ubiquinone; oxidizes succinate to fumarate while reducing ubiquinone to ubiquinol; the catalytic subunits are similar to fumarate reductase |
| NGO0921 | 0.0221 | -4.01 | down | 0.2809 | -1.66 | down | 0.0104 | -2.75 | down | putative succinate dehydrogenase flavoprotein subunit\ Context:(NC_002946)-[901660-903423]\ Notes:Best Blastp Hit: pir D81881 probable succinate dehydrogenase (EC 1.3.99.1) flavoprotein NMA1145 [imported] - Neisseria meningitidis (group A strain Z2491) >gi 7379838 emb CAB84407.1 (AL162755) putative succinate dehydrogenase flavoprotein subunit [Neisseria meningitidis] COG1053 Succinate dehydrogenase/fumarate reductase                                                                                                     |
| NGO0922 | 0.1184 | -2.24 | down | 0.3994 | -1.46 | down | 0.0168 | -2.20 | down | putative succinate dehydrogenase hydrophobic membrane anchor protein\ Context:(NC_002946)-[903426-903767]\ Notes:Best Blastp Hit: pir E81138 succinate dehydrogenase; hydrophobic membrane anchor protein NMB0949 [imported] - Neisseria meningitidis (group B strain MD58) >gi 7226188 gb AAF41355.1 (AE002446) succinate dehydrogenase; hydrophobic membrane anchor protein [Neisseria meningitidis MC58] COG2142 Cytochrome b subunit of fumarate reductase                                                                           |

|         |        |       |      |        |        |      |        |       |      |                                                                                                                                                                                                                                                                                                                                                                                                                                                                                                                                                                                            |
|---------|--------|-------|------|--------|--------|------|--------|-------|------|--------------------------------------------------------------------------------------------------------------------------------------------------------------------------------------------------------------------------------------------------------------------------------------------------------------------------------------------------------------------------------------------------------------------------------------------------------------------------------------------------------------------------------------------------------------------------------------------|
| NGO0923 | 0.0074 | -7.89 | down | 0.1842 | -1.96  | down | 0.0106 | -4.59 | down | putative fumarate reductase cytochrome b large subunit\<br>Context:(NC_002946)-[903761-904138]\ Notes:Best Blastp<br>Hit: pir   D81138 succinate dehydrogenase; cytochrome<br>b556 chain NMB0948 [imported] - Neisseria meningitidis<br>(group B strain MD58; group A strain Z2491)<br>>gi 7226187 gb AAF41354.1  (AE002446) succinate<br>dehydrogenase; cytochrome b556 subunit [Neisseria<br>meningitidis MC58] >gi 7379836 emb CAB84405.1 <br>(AL162755) putative succinate dehydrogenase cytochrome<br>B subunit [Neisseria meningitidis] COG2009 Cytochrome b<br>subunit of succinate |
| NGO0924 | 0.4139 | 2.14  | up   | 0.0330 | -15.17 | down | 0.6165 | 1.69  | up   | hypothetical protein\<br>Context:(NC_002946)-[904199-<br>904408]\ Notes:                                                                                                                                                                                                                                                                                                                                                                                                                                                                                                                   |
| NGO0925 | 0.3629 | -1.50 | down | 0.3788 | -1.50  | down | 0.6889 | -1.13 | down | dihydrolipoamide dehydrogenase\<br>Context:(NC_002946)-<br>[904425-905828]\ Notes:Catalyzes the oxidation of<br>dihydrolipoamide to lipoamide                                                                                                                                                                                                                                                                                                                                                                                                                                              |
| NGO0926 | 0.2161 | 2.30  | up   | 0.2074 | 1.53   | up   | 0.3266 | 1.58  | up   | putative peroxiredoxin family protein/glutaredoxin\<br>Context:(NC_002946)-[906077-906814]\ Notes:Best Blastp<br>Hit: gb AAF41352.1  (AE002445) peroxiredoxin 2 family<br>protein/glutaredoxin [Neisseria meningitidis MC58]<br>>gi 7379834 emb CAB84403.1  (AL162755) putative<br>redoxin [Neisseria meningitidis] COG0678 Peroxiredoxin                                                                                                                                                                                                                                                  |
| NGO0927 | 0.3963 | 1.47  | up   | 0.1113 | 2.27   | up   | 0.5640 | 1.23  | up   | hypothetical protein\<br>Context:(NC_002946)-[906917-<br>907081]\ Notes:Best Blastp Hit: gb AAF41351.1 <br>(AE002445) hypothetical protein [Neisseria meningitidis<br>MC58]                                                                                                                                                                                                                                                                                                                                                                                                                |
| NGO0928 | 0.4876 | 1.67  | up   | 0.0971 | 3.65   | up   | 0.1143 | 2.39  | up   | 5-methyltetrahydropteroyltriglutamate-- homocysteine<br>methyltransferase\<br>Context:(NC_002946)-[907093-<br>909369]\ Notes:catalyzes the transfer of a methyl group<br>from 5-methyltetrahydrofolate to homocysteine to form<br>methionine                                                                                                                                                                                                                                                                                                                                               |
| NGO0929 | 0.2836 | -1.75 | down | 0.6118 | 1.19   | up   | 0.7486 | -1.13 | down | 5,10-methylenetetrahydrofolate reductase\<br>Context:(NC_002946)-[909505-910383]\ Notes:MTHFR;<br>catalyzes NADH-linked reduction of 5,10-<br>methylenetetrahydrofolate to 5-methyltetrahydrofolate<br>using FAD as a cofactor                                                                                                                                                                                                                                                                                                                                                             |

|         |        |       |      |        |       |      |        |       |      |                                                                                                                                                                                                                                                                                                                                                                                                                                                                                                                                                                                                                                                                                                                                                                                             |
|---------|--------|-------|------|--------|-------|------|--------|-------|------|---------------------------------------------------------------------------------------------------------------------------------------------------------------------------------------------------------------------------------------------------------------------------------------------------------------------------------------------------------------------------------------------------------------------------------------------------------------------------------------------------------------------------------------------------------------------------------------------------------------------------------------------------------------------------------------------------------------------------------------------------------------------------------------------|
| NGO0930 | 0.1405 | 2.71  | up   | 0.2910 | 1.49  | up   | 0.4061 | 1.42  | up   | 50S ribosomal protein L31 type B\<br>Context:(NC_002946)+[910582-910857]\ Notes:RpmE2;<br>there appears to be two types of ribosomal proteins L31 in<br>bacterial genomes; some contain a CxxC motif while others<br>do not; Bacillus subtilis has both types; the proteins in this<br>cluster do not have the CXXC motif; RpmE is found in<br>exponentially growing Bacilli while YtiA was found after<br>exponential growth; expression of ytiA is controlled by a<br>zinc-specific transcriptional repressor; RpmE contains one<br>zinc ion and a CxxC motif is responsible for this binding;<br>forms an RNP particle along with proteins L5; L18; and L25<br>and 5S rRNA; found crosslinked to L2 and L25 and EF-G;<br>may be near the peptidyltransferase site of the 50S<br>ribosome |
| NGO0931 | 0.1235 | 2.73  | up   | 0.2453 | 1.56  | up   | 0.3908 | 1.39  | up   | 50S ribosomal protein L36\<br>Context:(NC_002946)+[910857-<br>910982]\ Notes:smallest protein in the large subunit;<br>similar to what is found with protein L31 and L33 several<br>bacterial genomes contain paralogs which may be<br>regulated by zinc; the protein from Thermus thermophilus<br>has a zinc-binding motif and contains a bound zinc ion; the<br>proteins in this group do not have the motif                                                                                                                                                                                                                                                                                                                                                                              |
| NGO0932 | 0.9285 | -1.06 | down | 0.3803 | -1.58 | down | 0.3592 | -1.53 | down | hypothetical protein\<br>Context:(NC_002946)+[911041-<br>911481]\ Notes:Best Blastp Hit: gb AAA53170.1  (U00415)<br>gp120 [Human immunodeficiency virus type 1]                                                                                                                                                                                                                                                                                                                                                                                                                                                                                                                                                                                                                             |
| NGO0933 | 0.4724 | 1.36  | up   | 0.9825 | 1.01  | up   | 0.7956 | 1.09  | up   | homoserine O-acetyltransferase\<br>Context:(NC_002946)+[911429-912568]\ Notes:Catalyzes<br>the conversion of acetyl-CoA and L-homoserine to CoA and<br>O-acetyl-L-homoserine                                                                                                                                                                                                                                                                                                                                                                                                                                                                                                                                                                                                                |
| NGO0934 | 0.6300 | 1.25  | up   | 0.8609 | -1.09 | down | 0.5383 | -1.40 | down | hypothetical protein\<br>Context:(NC_002946)+[912565-<br>913146]\ Notes:Best Blastp Hit: pir   B81880 hypothetical<br>protein NMA1135 [imported] - Neisseria meningitidis<br>(group A strain Z2491) >gi 7379828 emb CAB84397.1 <br>(AL162755) hypothetical protein NMA1135 [Neisseria<br>meningitidis]                                                                                                                                                                                                                                                                                                                                                                                                                                                                                      |
| NGO0936 | 0.0452 | 3.15  | up   | 0.2299 | 1.61  | up   | 0.2884 | 1.58  | up   | elongation factor P\<br>Context:(NC_002946)-[914253-<br>914813]\ Notes:Involved in peptide bond synthesis; alters<br>the affinity of the ribosome for aminoacyl-tRNA                                                                                                                                                                                                                                                                                                                                                                                                                                                                                                                                                                                                                        |



|         |        |        |      |        |        |      |        |       |      |                                                                                                                                                                                                                                                                                                                                                                                                             |
|---------|--------|--------|------|--------|--------|------|--------|-------|------|-------------------------------------------------------------------------------------------------------------------------------------------------------------------------------------------------------------------------------------------------------------------------------------------------------------------------------------------------------------------------------------------------------------|
| NGO0937 | 0.5137 | 1.62   | up   | 0.3623 | -2.12  | down | 0.4983 | -1.59 | down | hypothetical protein\ Context:(NC_002946)-[914856-916007]\ Notes:Best Blastp Hit: pir    G81879 hypothetical protein NMA1132 [imported] - Neisseria meningitidis (group A strain Z2491) >gi 7379825 emb CAB84394.1  (AL162755) hypothetical protein NMA1132 [Neisseria meningitidis]                                                                                                                        |
| NGO0938 | 0.5013 | -1.87  | down | 0.9609 | 1.02   | up   | 0.8520 | 1.26  | up   | hypothetical protein\ Context:(NC_002946)-[916026-916334]\ Notes:Best Blastp Hit: pir    F81879 probable membrane protein NMA1131 [imported] - Neisseria meningitidis (group A strain Z2491) >gi 7379824 emb CAB84393.1  (AL162755) putative membrane protein [Neisseria meningitidis]                                                                                                                      |
| NGO0939 | 0.0637 | -10.69 | down | 0.0866 | -21.65 | down | 0.1896 | 2.89  | up   | hypothetical protein\ Context:(NC_002946)-[916342-916653]\ Notes:                                                                                                                                                                                                                                                                                                                                           |
| NGO0940 | 0.9431 | 1.05   | up   | 0.0479 | -4.03  | down | 0.6903 | -1.38 | down | putative tRNA delta transferase\ Context:(NC_002946)+[916655-917596]\ Notes:Best Blastp Hit: pir    E81879 probable tRNA isopentenyltransferase (EC 2.5.1.8) NMA1130 [imported] - Neisseria meningitidis (group A strain Z2491) >gi 7379823 emb CAB84392.1  (AL162755) putative tRNA delta(2)-isopentenylpyrophosphate transferase [Neisseria meningitidis] COG0324 tRNA delta (2)-isopentenylpyrophosphate |
| NGO0941 | 0.3276 | 2.11   | up   | 0.3421 | -3.48  | down | 0.6934 | -1.46 | down | putative cytosine deaminase\ Context:(NC_002946)+[917600-918319]\ Notes:Best Blastp Hit: gb AAF41340.1  (AE002444) cytidine and deoxycytidylate deaminase family protein [Neisseria meningitidis MC58] COG0590 Cytosine deaminase-related enzymes                                                                                                                                                           |
| NGO0942 | 0.7490 | -1.32  | down | 0.0154 | -14.22 | down | 0.9001 | -1.13 | down | hypothetical protein\ Context:(NC_002946)+[918324-918812]\ Notes:Best Blastp Hit: gb AAF41339.1  (AE002444) conserved hypothetical protein [Neisseria meningitidis MC58]                                                                                                                                                                                                                                    |
| NGO0947 | 0.5976 | 1.37   | up   | 0.6723 | 1.18   | up   | 0.3774 | 1.32  | up   | dihydrodipicolinate synthase\ Context:(NC_002946)+[921445-922320]\ Notes:catalyzes the formation of dihydrodipicolinate from L-aspartate 4-semialdehyde and pyruvate in lysine and diamminopimelate biosynthesis                                                                                                                                                                                            |

|         |        |       |      |        |        |      |        |       |      |                                                                                                                                                                                                                                                                                                                                                                                     |
|---------|--------|-------|------|--------|--------|------|--------|-------|------|-------------------------------------------------------------------------------------------------------------------------------------------------------------------------------------------------------------------------------------------------------------------------------------------------------------------------------------------------------------------------------------|
| NGO0948 | 0.1168 | 2.33  | up   | 0.0960 | 2.40   | up   | 0.1523 | 1.77  | up   | hypothetical protein\ Context:(NC_002946)+[922329-923525]\ Notes:Best Blastp Hit: pir     C81141 hypothetical protein NMB0928 [imported] - Neisseria meningitidis (group B strain MD58) >gi 7226166 gb AAF41335.1  (AE002444) hypothetical protein [Neisseria meningitidis MC58]                                                                                                    |
| NGO0949 | 0.4615 | 1.49  | up   | 0.4933 | 1.39   | up   | 0.8414 | -1.07 | down | proline iminopeptidase\ Context:(NC_002946)-[923582-924514]\ Notes:Best Blastp Hit: sp P42786 PIP_NEIGO proline iminopeptidase (prolyl aminopeptidase) >gi 1073191 pir   S39592 prolyl aminopeptidase (EC 3.4.11.5) - Neisseria gonorrhoeae >gi 396840 emb CAA80948.1  (Z25461) proline iminopeptidase Pip [Neisseria gonorrhoeae] COG0596 Predicted hydrolases or acyltransferases |
| NGO0950 | 0.9474 | 1.05  | up   | 0.0866 | -2.44  | down | 0.9414 | -1.03 | down | hypothetical protein\ Context:(NC_002946)-[924507-924803]\ Notes:                                                                                                                                                                                                                                                                                                                   |
| NGO0952 | 0.4778 | 1.36  | up   | 0.0393 | 3.14   | up   | 0.3112 | 1.74  | up   | putative TonB-dependent receptor protein\ Context:(NC_002946)+[926135-928903]\ Notes:Best Blastp Hit: emb CAB84928.1  (AL162756) putative outer membrane substrate binding protein [Neisseria meningitidis] COG1629 Outer membrane receptor proteins; mostly Fe                                                                                                                     |
| NGO0953 | 0.0764 | -3.69 | down | 0.0185 | -6.88  | down | 0.3077 | -1.98 | down | hypothetical protein\ Context:(NC_002946)+[928934-929149]\ Notes:                                                                                                                                                                                                                                                                                                                   |
| NGO0955 | 0.0500 | -8.36 | down | 0.1464 | -2.20  | down | 0.2112 | -2.29 | down | hypothetical protein\ Context:(NC_002946)-[929779-929928]\ Notes:                                                                                                                                                                                                                                                                                                                   |
| NGO0956 | 0.3783 | 1.56  | up   | 0.9512 | -1.03  | down | 0.8009 | -1.09 | down | aspartate kinase\ Context:(NC_002946)-[929928-931145]\ Notes:catalyzes the formation of 4-phospho-L-aspartate from L-aspartate and ATP; in Bacillus; lysine sensitive; regulated by response to starvation.                                                                                                                                                                         |
| NGO0957 | 0.8992 | 1.16  | up   | 0.1771 | -10.92 | down | 0.6605 | -1.48 | down | hypothetical protein\ Context:(NC_002946)+[931182-931346]\ Notes:                                                                                                                                                                                                                                                                                                                   |
| NGO0958 | 0.4256 | -1.72 | down | 0.0594 | -3.50  | down | 0.2552 | -1.44 | down | putative ribonuclease PH\ Context:(NC_002946)-[931347-932075]\ Notes:Best Blastp Hit: pir     A81866 tRNA nucleotidyltransferase (EC 2.7.7.56) - Neisseria meningitidis (group A strain Z2491) >gi 7380343 emb CAB84930.1  (AL162756) ribonuclease PH [Neisseria meningitidis] COG0689 RNase PH                                                                                     |

|         |        |       |      |        |        |      |        |       |      |                                                                                                                                                                                                                                                                                                                              |
|---------|--------|-------|------|--------|--------|------|--------|-------|------|------------------------------------------------------------------------------------------------------------------------------------------------------------------------------------------------------------------------------------------------------------------------------------------------------------------------------|
| NGO0959 | 0.6292 | -1.28 | down | 0.6038 | -1.33  | down | 0.3481 | -1.40 | down | hypothetical protein\ Context:(NC_002946)-[932157-932621]\ Notes:Best Blastp Hit: emb CAB84931.1  (AL162756) conserved hypothetical protein [Neisseria meningitidis] COG0589 Universal stress protein UspA and related                                                                                                       |
| NGO0960 | 0.1669 | -5.05 | down | 0.0005 | -35.26 | down | 0.0170 | -9.51 | down | hypothetical protein\ Context:(NC_002946)+[932839-933615]\ Notes:Best Blastp Hit: gb AAF41857.1  (AE002499) HesA/MoeB/ThiF family protein [Neisseria meningitidis MC58] COG1179 Dinucleotide-utilizing enzymes involved in                                                                                                   |
| NGO0961 | 0.0241 | -6.84 | down | 0.0613 | -4.70  | down | 0.1840 | -2.90 | down | hypothetical protein\ Context:(NC_002946)+[933860-934714]\ Notes:Best Blastp Hit: pir D81075 conserved hypothetical protein NMB1504 [imported] - Neisseria meningitidis (group B strain MD58) >gi 7226747 gb AAF41860.1  (AE002500) conserved hypothetical protein [Neisseria meningitidis MC58] COG1354 Uncharacterized ACR |
| NGO0962 | 0.0775 | -3.21 | down | 0.1985 | -2.37  | down | 0.1198 | -2.85 | down | nicotinate phosphoribosyltransferase\ Context:(NC_002946)+[934704-935963]\ Notes:catalyzes the formation of nicotinate and 5-phospho-alpha-D-ribose 1-diphosphate from nicotinate D-ribonucleotide and diphosphate                                                                                                           |
| NGO0963 | 0.9433 | 1.03  | up   | 0.7204 | -1.21  | down | 0.7684 | 1.08  | up   | arginyl-tRNA synthetase\ Context:(NC_002946)+[936055-937773]\ Notes:catalyzes a two-step reaction; first charging an arginine molecule by linking its carboxyl group to the alpha-phosphate of ATP; followed by transfer of the aminoacyl-adenylate to its tRNA; class-I aminoacyl-tRNA synthetase                           |
| NGO0967 | 0.9485 | -1.05 | down | 0.8242 | -1.18  | down | 0.5510 | 1.63  | up   | hypothetical protein\ Context:(NC_002946)+[939735-939995]\ Notes:Best Blastp Hit: gb AAF41506.1  (AE002461) hypothetical protein [Neisseria meningitidis MC58]                                                                                                                                                               |

|         |        |       |      |        |       |      |        |       |      |                                                                                                                                                                                                                                                                                                                                                                                                                                                                                                                                                                                                              |
|---------|--------|-------|------|--------|-------|------|--------|-------|------|--------------------------------------------------------------------------------------------------------------------------------------------------------------------------------------------------------------------------------------------------------------------------------------------------------------------------------------------------------------------------------------------------------------------------------------------------------------------------------------------------------------------------------------------------------------------------------------------------------------|
| NGO0968 | 0.1138 | -2.76 | down | 0.0299 | -3.33 | down | 0.1409 | -1.77 | down | putative ABC transporter; permease protein; amino acid\<br>Context:(NC_002946)-[940182-940928]\ Notes:Best Blastp<br>Hit: pir   A81076 amino acid ABC transporter; permease<br>protein NMB1509 [imported] - Neisseria meningitidis<br>(group B strain MD58; group A strain Z2491)<br>>gi 7226752 gb AAF41865.1  (AE002500) amino acid ABC<br>transporter; permease protein [Neisseria meningitidis<br>MC58] >gi 7380350 emb CAB84937.1  (AL162756)<br>putative binding-protein-dependent transport systems<br>inner membrane protein [Neisseria meningitidis] COG0765<br>Amino acid ABC transporter permease |
| NGO0969 | 0.5563 | -1.61 | down | 0.0396 | -4.34 | down | 0.3250 | -2.09 | down | hypothetical protein\ Context:(NC_002946)-[941107-<br>941808]\ Notes:Best Blastp Hit: gb AAF41866.1 <br>(AE002500) thermonuclease family protein [Neisseria<br>meningitidis MC58] >gi 7380351 emb CAB84938.1 <br>(AL162756) putative nuclease [Neisseria meningitidis]<br>COG1525 Micrococcal nuclease (thermonuclease)                                                                                                                                                                                                                                                                                      |
| NGO0970 | 0.8546 | 1.13  | up   | 0.2872 | -1.72 | down | 0.1102 | -1.90 | down | ribose-5-phosphate isomerase A\ Context:(NC_002946)-<br>[941847-942518]\ Notes:Catalyzes D-ribose 5-phosphate --<br>> D-ribulose 5-phosphate in the nonoxidative branch of the<br>pentose phosphate pathway                                                                                                                                                                                                                                                                                                                                                                                                  |
| NGO0971 | 0.0811 | 3.48  | up   | 0.3450 | 1.68  | up   | 0.2943 | -1.59 | down | 2-C-methyl-D-erythritol 2;4-cyclodiphosphate synthase\<br>Context:(NC_002946)-[942595-943077]\ Notes:catalyzes<br>the conversion of 4-diphosphocytidyl-2-C-methyl-D-<br>erythritol 2-phosphate into 2-C-methyl-D-erythritol 2;4-<br>cyclodiphosphate                                                                                                                                                                                                                                                                                                                                                         |
| NGO0972 | 0.3716 | 1.62  | up   | 0.2746 | -1.83 | down | 0.7559 | -1.23 | down | hypothetical protein\ Context:(NC_002946)-[943109-<br>943798]\ Notes:Best Blastp Hit: pir   D81867 conserved<br>hypothetical protein NMA1713 [imported] - Neisseria<br>meningitidis (group A strain Z2491)<br>>gi 7380354 emb CAB84941.1  (AL162756) conserved<br>hypothetical protein [Neisseria meningitidis] COG1211 4-<br>diphosphocytidyl-2-methylerythritol                                                                                                                                                                                                                                            |

|         |        |       |      |        |       |      |        |       |      |                                                                                                                                                                                                                                                                                                                                                                                                     |
|---------|--------|-------|------|--------|-------|------|--------|-------|------|-----------------------------------------------------------------------------------------------------------------------------------------------------------------------------------------------------------------------------------------------------------------------------------------------------------------------------------------------------------------------------------------------------|
| NGO0973 | 0.9380 | 1.04  | up   | 0.8400 | -1.09 | down | 0.5384 | 1.19  | up   | putative DNA polymerase III; epsilon chain\<br>Context:(NC_002946)-[943795-944529]\ Notes:Best Blastp Hit: pir    E81867 DNA-directed DNA polymerase (EC 2.7.7.7) III epsilon chain NMA1714 [imported] - Neisseria meningitidis (group A strain Z2491) >gi 7380355 emb CAB84942.1  (AL162756) DNA polymerase III; epsilon chain [Neisseria meningitidis] COG0847 DNA polymerase III epsilon subunit |
| NGO0974 | 0.0088 | -8.62 | down | 0.0141 | -8.34 | down | 0.0938 | -3.27 | down | hypothetical protein\<br>Context:(NC_002946)-[944685-945995]\ Notes:Best Blastp Hit: pir    B81074 transporter; probable NMB1515 [imported] - Neisseria meningitidis (group B strain MD58) >gi 7226759 gb AAF41871.1  (AE002501) transporter; putative [Neisseria meningitidis MC58]                                                                                                                |
| NGO0975 | 0.7735 | -1.14 | down | 0.8410 | -1.09 | down | 0.4629 | -1.48 | down | FixS\<br>Context:(NC_002946)-[945985-946170]\ Notes:Best Blastp Hit: gb AAF41872.1  (AE002501) fixS protein [Neisseria meningitidis MC58] >gi 7380357 emb CAB84944.1  (AL162756) putative inner membrane protein [Neisseria meningitidis]; putative nitrogen fixation protein                                                                                                                       |
| NGO0976 | 0.4620 | 1.41  | up   | 0.9502 | 1.03  | up   | 0.8770 | -1.05 | down | hypothetical protein\<br>Context:(NC_002946)-[946170-946469]\ Notes:Best Blastp Hit: gb AAF41873.1  (AE002501) hypothetical protein [Neisseria meningitidis MC58] >gi 7380358 emb CAB84945.1  (AL162756) hypothetical protein [Neisseria meningitidis]                                                                                                                                              |
| NGO0977 | 0.1132 | 2.55  | up   | 0.0379 | 5.23  | up   | 0.0667 | 2.60  | up   | putative acetate kinase\<br>Context:(NC_002946)+[946790-948016]\ Notes:Best Blastp Hit: pir    A81868 acetate kinase (EC 2.7.2.1) NMA1718 [imported] - Neisseria meningitidis (group A strain Z2491) >gi 7380359 emb CAB84946.1  (AL162756) acetate kinase [Neisseria meningitidis] COG0282 Acetate kinase                                                                                          |
| NGO0978 | 0.0081 | 7.44  | up   | 0.1023 | 6.72  | up   | 0.1101 | 2.04  | up   | thiol:disulfide interchange protein precursor\<br>Context:(NC_002946)-[948529-950370]\ Notes:two electrons are transferred from cytoplasmic NADPH to thioredoxin and then to the inner membrane protein DsbD which keeps the disulfide isomerase DsbC in a reduced state in the oxidizing periplasm; DsbC in turns rearranges incorrectly made disulfide bonds in the periplasm                     |

|         |        |       |      |        |       |      |        |       |      |                                                                                                                                                                                                                                                                                                                                                                                                                                                                                                                                 |
|---------|--------|-------|------|--------|-------|------|--------|-------|------|---------------------------------------------------------------------------------------------------------------------------------------------------------------------------------------------------------------------------------------------------------------------------------------------------------------------------------------------------------------------------------------------------------------------------------------------------------------------------------------------------------------------------------|
| NGO0979 | 0.4328 | -1.49 | down | 0.8459 | -1.07 | down | 0.4859 | -1.88 | down | hypothetical protein\ Context:(NC_002946)+[950461-950931]\ Notes:Best Blastp Hit: pir     C81868 hypothetical protein NMA1720 [imported] - Neisseria meningitidis (group A strain Z2491) >gi 7380361 emb CAB84948.1  (AL162756) hypothetical protein [Neisseria meningitidis]                                                                                                                                                                                                                                                   |
| NGO0980 | 0.2078 | -2.25 | down | 0.0601 | -2.21 | down | 0.3245 | -1.54 | down | putative transferase\ Context:(NC_002946)-[951004-951831]\ Notes:Best Blastp Hit: emb CAB84949.1  (AL162756) putative transferase [Neisseria meningitidis] COG1562 Phytoene/squalene synthetase                                                                                                                                                                                                                                                                                                                                 |
| NGO0981 | 0.3627 | 1.68  | up   | 0.4332 | 1.41  | up   | 0.3530 | 1.43  | up   | putative peptidyl-prolyl cis-trans isomerase\ Context:(NC_002946)-[951903-952385]\ Notes:Best Blastp Hit: gb AAF41878.1  (AE002501) FKBP-type peptidyl-prolyl cis-trans isomerase SlyD [Neisseria meningitidis MC58] >gi 7380363 emb CAB84950.1  (AL162756) putative peptidyl-prolyl isomerase [Neisseria meningitidis] COG1047 FKBP-type peptidyl-prolyl cis-trans                                                                                                                                                             |
| NGO0982 | 0.3342 | 3.73  | up   | 0.2811 | -3.84 | down | 0.4082 | 2.68  | up   | hypothetical protein\ Context:(NC_002946)+[952514-952798]\ Notes:                                                                                                                                                                                                                                                                                                                                                                                                                                                               |
| NGO0983 | 0.5444 | 1.46  | up   | 0.7563 | 1.13  | up   | 0.5756 | 1.21  | up   | Lip\ Context:(NC_002946)+[952858-953124]\ Notes:outer membrane protein H.8                                                                                                                                                                                                                                                                                                                                                                                                                                                      |
| NGO0984 | 0.2237 | -2.92 | down | 0.0856 | -7.35 | down | 0.4317 | -1.31 | down | hypothetical protein\ Context:(NC_002946)+[953234-954601]\ Notes:Best Blastp Hit: pir     G81868 hypothetical protein NMA1724 [imported] - Neisseria meningitidis (group A strain Z2491) >gi 7380365 emb CAB84952.1  (AL162756) hypothetical protein [Neisseria meningitidis] COG0277 FAD/FMN-containing dehydrogenases                                                                                                                                                                                                         |
| NGO0986 | 0.0690 | 3.04  | up   | 0.9731 | 1.02  | up   | 0.3099 | -1.45 | down | SsrA-binding protein\ Context:(NC_002946)-[957331-957783]\ Notes:binds to ssrA RNA (tmRNA) and is required for its successful binding to ribosomes; also appears to function in the trans-translation step by promoting accommodation of tmRNA into the ribosomal A site; SmpB protects the tmRNA from RNase R degradation in Caulobacter crescentus; both the tmRNA and SmpB are regulated in cell cycle-dependent manner; functions in release of stalled ribosomes from damaged mRNAs and targeting proteins for degradation |

|         |        |       |      |        |       |      |        |       |      |                                                                                                                                                                                                                                                                                                                                                                                                                                                                                     |
|---------|--------|-------|------|--------|-------|------|--------|-------|------|-------------------------------------------------------------------------------------------------------------------------------------------------------------------------------------------------------------------------------------------------------------------------------------------------------------------------------------------------------------------------------------------------------------------------------------------------------------------------------------|
| NGO0987 | 0.8658 | -1.08 | down | 0.8098 | -1.15 | down | 0.0534 | -1.95 | down | ADP-heptose--LPS heptosyltransferase II\<br>Context:(NC_002946)-[957832-958842]\ Notes:Best Blastp Hit: pir    S61299 lipopolysaccharide heptosyltransferase (EC 2.4.99.-) II rfaF [similarity] - Neisseria gonorrhoeae >gi 599920 emb CAA85504.1  (Z37141) ADP-heptose:LPS heptosyltransferase II [Neisseria gonorrhoeae] COG0859 ADP-heptose: LPS heptosyltransferase; RfaF                                                                                                       |
| NGO0988 | 0.3158 | -1.62 | down | 0.5406 | -1.34 | down | 0.8270 | -1.07 | down | putative methylated-DNA-protein-cysteine methyltransferase\<br>Context:(NC_002946)-[959239-960108]\ Notes:Best Blastp Hit: emb CAB84956.1  (AL162756) putative methylated-DNA-protein-cysteine methyltransferase [Neisseria meningitidis] COG0350 Methylated DNA-protein cysteine                                                                                                                                                                                                   |
| NGO0990 | 0.7060 | 1.41  | up   | 0.4497 | -2.52 | down | 0.1133 | -5.89 | down | AraC family transcriptional regulator\<br>Context:(NC_002946)-[960876-961739]\ Notes:Best Blastp Hit: sp P77634 YBCM_ECOLI hypothetical transcriptional regulator in EMRE-RUS intergenic region >gi 7467042 pir   H64786 ybcM protein - Escherichia coli >gi 1778460 gb AAB40743.1  (U82598) hypothetical protein [Escherichia coli] >gi 1786758 gb AAC73647.1  (AE000160) putative ARAC-type regulatory protein [Escherichia coli] COG2207 AraC-type DNA-binding domain-containing |
| NGO0991 | 0.8540 | -1.09 | down | 0.3445 | -1.49 | down | 0.5398 | -1.28 | down | succinyl-diaminopimelate desuccinylase\<br>Context:(NC_002946)-[962111-963256]\ Notes:dapE-encoded N-succinyl-L;L-diaminopimelic acid desuccinylase (DapE); catalyzes the hydrolysis of N-succinyl-L;Ldiaminopimelate L;L-SDAP to L;L-diaminopimelate and succinate. It is a metalloprotease containing dinuclear active sites. Its structure is similar to the carboxypeptidase G2 from Pseudomonas sp. strain RS-16 and the aminopeptidase from Aeromonas proteolytica.           |

|         |        |       |      |        |       |      |        |       |      |                                                                                                                                                                                                                                                                                                                                                                                                                          |
|---------|--------|-------|------|--------|-------|------|--------|-------|------|--------------------------------------------------------------------------------------------------------------------------------------------------------------------------------------------------------------------------------------------------------------------------------------------------------------------------------------------------------------------------------------------------------------------------|
| NGO0992 | 0.1845 | -2.01 | down | 0.0449 | -2.69 | down | 0.1065 | -2.48 | down | hypothetical protein\ Context:(NC_002946)-[963369-963989]\ Notes:Best Blastp Hit: pir    G81071 conserved hypothetical protein NMB1531 [imported] - Neisseria meningitidis (group B strain MD58; group A strain Z2491) >gi 7226776 gb AAF41886.1  (AE002503) conserved hypothetical protein [Neisseria meningitidis MC58] >gi 7380373 emb CAB84959.1  (AL162757) conserved hypothetical protein [Neisseria meningitidis] |
| NGO0993 | 0.0108 | -6.12 | down | 0.1941 | -1.76 | down | 0.1249 | -3.82 | down | hypothetical protein\ Context:(NC_002946)-[964023-964532]\ Notes:Best Blastp Hit: pir    H81071 conserved hypothetical protein NMB1532 [imported] - Neisseria meningitidis (group B strain MD58) >gi 7226777 gb AAF41887.1  (AE002503) conserved hypothetical protein [Neisseria meningitidis MC58]                                                                                                                      |
| NGO0994 | 0.0330 | 4.48  | up   | 0.0241 | 4.07  | up   | 0.0889 | 2.83  | up   | Laz\ Context:(NC_002946)-[964627-965178]\ Notes:Best Blastp Hit: sp P07212 H8_NEIMC H.8 outer membrane protein precursor >gi 279443 pir   AZNHM azurin precursor - Neisseria meningitidis >gi 45042 emb CAA68589.1  (Y00530) outer membrane protein H.8 (AA 1-183) [Neisseria meningitidis]; lipid modified azurin protein                                                                                               |
| NGO0995 | 0.9393 | -1.03 | down | 0.7395 | 1.22  | up   | 0.3859 | -1.31 | down | hypothetical protein\ Context:(NC_002946)-[965461-965883]\ Notes:Best Blastp Hit: pir    F81797 hypothetical protein NMA1734 [imported] - Neisseria meningitidis (group A strain Z2491) >gi 7380376 emb CAB84962.1  (AL162757) hypothetical protein [Neisseria meningitidis]                                                                                                                                             |
| NGO0996 | 0.0764 | 2.85  | up   | 0.0636 | 4.98  | up   | 0.1133 | 2.11  | up   | preprotein translocase subunit SecA\ Context:(NC_002946)+[966015-968765]\ Notes:functions in protein export; can interact with acidic membrane phospholipids and the SecYEG protein complex; binds to preproteins; binds to ATP and undergoes a conformational change to promote membrane insertion of SecA/bound preprotein                                                                                             |
| NGO0998 | 0.0035 | 10.24 | up   | 0.1460 | 4.75  | up   | 0.0110 | 4.86  | up   | DNA primase\ Context:(NC_002946)+[968910-970682]\ Notes:synthesizes RNA primers at the replication forks                                                                                                                                                                                                                                                                                                                 |



|         |        |       |      |        |       |      |        |       |      |                                                                                                                                                                                                                                                                                                 |
|---------|--------|-------|------|--------|-------|------|--------|-------|------|-------------------------------------------------------------------------------------------------------------------------------------------------------------------------------------------------------------------------------------------------------------------------------------------------|
| NGO0999 | 0.1102 | 2.75  | up   | 0.0643 | 2.35  | up   | 0.1925 | 1.91  | up   | RNA polymerase sigma factor RpoD\<br>Context:(NC_002946)+[970869-972797]\ Notes:sigma factors are initiation factors that promote the attachment of RNA polymerase to specific initiation sites and are then released; this is the primary sigma factor of bacteria                             |
| NGO1000 | 0.6969 | -1.28 | down | 0.3136 | -1.92 | down | 0.3597 | -1.44 | down | putative phage associated protein\<br>Context:(NC_002946)-[972837-973064]\ Notes:Best Blastp Hit: pir   F72596 hypothetical protein APE1239 - Aeropyrum pernix (strain K1) >gi 5104914 dbj BAA80228.1   (AP000061) 221aa long hypothetical protein [Aeropyrum pernix]                           |
| NGO1001 | 0.6214 | -1.53 | down | 0.2468 | -4.01 | down | 0.2632 | -2.49 | down | putative phage associated protein\<br>Context:(NC_002946)-[973188-973673]\ Notes:Best Blastp Hit: dbj BAB04059.1   (AP001508) unknown [Bacillus halodurans]                                                                                                                                     |
| NGO1002 | 0.6058 | -1.60 | down | 0.9808 | 1.03  | up   | 0.6313 | 1.76  | up   | putative phage associated protein\<br>Context:(NC_002946)-[973680-974048]\ Notes:                                                                                                                                                                                                               |
| NGO1003 | 0.1940 | 2.69  | up   | 0.4598 | -2.10 | down | 0.9593 | 1.04  | up   | putative phage associated protein\<br>Context:(NC_002946)-[974075-974617]\ Notes:Best Blastp Hit: dbj BAB04058.1   (AP001508) unknown conserved protein in others [Bacillus halodurans]                                                                                                         |
| NGO1004 | 0.5988 | -1.41 | down | 0.2015 | -4.36 | down | 0.4130 | 1.63  | up   | putative phage associated protein\<br>Context:(NC_002946)-[974783-975142]\ Notes:                                                                                                                                                                                                               |
| NGO1005 | 0.9278 | -1.05 | down | 0.9345 | -1.05 | down | 0.2139 | -1.93 | down | putative phage associated protein\<br>Context:(NC_002946)-[975275-976141]\ Notes:                                                                                                                                                                                                               |
| NGO1007 | 0.5504 | 1.34  | up   | 0.3036 | 1.73  | up   | 0.7081 | -1.30 | down | putative phage associated protein\<br>Context:(NC_002946)-[976976-977185]\ Notes:Best Blastp Hit: gi 9633475 hypothetical protein [Bacteriophage VT2-Sa] >gi 5881671 dbj BAA84362.1   (AP000363) hypothetical protein [Bacteriophage VT2-Sa]                                                    |
| NGO1008 | 0.1284 | 2.46  | up   | 0.3214 | -1.47 | down | 0.9662 | 1.01  | up   | putative phage associated protein\<br>Context:(NC_002946)-[977178-977468]\ Notes:Best Blastp Hit: pir   A81123 hypothetical protein NMB1087 [imported] - Neisseria meningitidis (group B strain MD58) >gi 7226325 gb AAF41479.1   (AE002459) hypothetical protein [Neisseria meningitidis MC58] |

|         |        |       |      |        |        |      |        |       |      |                                                                                                                                                                                                                                                                                                                                                                            |
|---------|--------|-------|------|--------|--------|------|--------|-------|------|----------------------------------------------------------------------------------------------------------------------------------------------------------------------------------------------------------------------------------------------------------------------------------------------------------------------------------------------------------------------------|
| NGO1009 | 0.6135 | -1.38 | down | 0.0603 | -1.94  | down | 0.4809 | -1.31 | down | putative phage associated protein\ Context:(NC_002946)-[977473-977760]\ Notes:Best Blastp Hit: gb AAF41415.1  (AE002452) conserved hypothetical protein [Neisseria meningitidis MC58]                                                                                                                                                                                      |
| NGO1010 | 0.9626 | -1.03 | down | 0.5200 | 1.43   | up   | 0.8186 | -1.17 | down | putative phage associated protein\ Context:(NC_002946)-[977880-978314]\ Notes:                                                                                                                                                                                                                                                                                             |
| NGO1011 | 0.1009 | -3.15 | down | 0.1407 | -3.37  | down | 0.6415 | -1.50 | down | putative phage associated protein\ Context:(NC_002946)-[978515-978889]\ Notes:Best Blastp Hit: dbj BAB06568.1  (AP001516) GTP pyrophosphokinase [Bacillus halodurans]                                                                                                                                                                                                      |
| NGO1012 | 0.2657 | 1.72  | up   | 0.0549 | 1.97   | up   | 0.5536 | 1.19  | up   | putative phage associated protein\ Context:(NC_002946)-[978886-979764]\ Notes:                                                                                                                                                                                                                                                                                             |
| NGO1013 | 0.0870 | -2.59 | down | 0.2776 | -1.76  | down | 0.8696 | -1.09 | down | putative phage repressor; putative phage associated protein\ Context:(NC_002946)-[980160-980540]\ Notes:Best Blastp Hit: pir   H81130 transcription regulator NMB1007 [imported] - Neisseria meningitidis (group B strain MD58) >gi 7226247 gb AAF41408.1  (AE002452) transcriptional regulator [Neisseria meningitidis MC58] COG1396 Predicted transcriptional regulators |
| NGO1014 | 0.7903 | 1.18  | up   | 0.1308 | -3.75  | down | 0.2167 | 1.78  | up   | putative phage associated protein\ Context:(NC_002946)+[980749-981042]\ Notes:Best Blastp Hit: gb AAF41406.1  (AE002451) hypothetical protein [Neisseria meningitidis MC58]                                                                                                                                                                                                |
| NGO1015 | 0.0385 | -7.05 | down | 0.0728 | -12.54 | down | 0.6616 | 1.37  | up   | putative phage associated protein\ Context:(NC_002946)+[981023-981313]\ Notes:Best Blastp Hit: gb AAF41404.1  (AE002451) hypothetical protein [Neisseria meningitidis MC58]                                                                                                                                                                                                |
| NGO1020 | 0.0424 | -6.40 | down | 0.0136 | -29.43 | down | 0.8544 | -1.13 | down | putative phage associated protein\ Context:(NC_002946)+[982212-984008]\ Notes:                                                                                                                                                                                                                                                                                             |
| NGO1024 | 0.0055 | -5.30 | down | 0.5336 | -1.60  | down | 0.0246 | -5.85 | down | hypothetical protein\ Context:(NC_002946)+[986456-987631]\ Notes:Best Blastp Hit: pir   F81861 hypothetical protein NMA1666 [imported] - Neisseria meningitidis (group A strain Z2491) >gi 7380308 emb CAB84894.1  (AL162756) hypothetical protein [Neisseria meningitidis] COG2070 Dioxygenases related to 2-nitropropane                                                 |

|         |        |       |      |        |       |      |        |       |      |                                                                                                                                                                                                                                                                                                                                                                                                                                                                                              |
|---------|--------|-------|------|--------|-------|------|--------|-------|------|----------------------------------------------------------------------------------------------------------------------------------------------------------------------------------------------------------------------------------------------------------------------------------------------------------------------------------------------------------------------------------------------------------------------------------------------------------------------------------------------|
| NGO1025 | 0.9700 | -1.02 | down | 0.9768 | -1.01 | down | 0.6679 | -1.12 | down | hypothetical protein\ Context:(NC_002946)-[987973-988521]\ Notes:Best Blastp Hit: pir     G81861 probable inner membrane protein NMA1667 [imported] - Neisseria meningitidis (group A strain Z2491) >gi 7380309 emb CAB84895.1  (AL162756) putative inner membrane protein [Neisseria meningitidis]                                                                                                                                                                                          |
| NGO1026 | 0.2225 | 2.41  | up   | 0.6870 | 1.36  | up   | 0.9506 | 1.02  | up   | putative ferredoxin\ Context:(NC_002946)-[988524-990020]\ Notes:Best Blastp Hit: gb AAF41813.1  (AE002495) ferredoxin; 4Fe-4S bacterial type [Neisseria meningitidis MC58] COG0348 Polyferredoxin                                                                                                                                                                                                                                                                                            |
| NGO1027 | 0.6041 | -1.72 | down | 0.0709 | -8.11 | down | 0.8188 | -1.18 | down | hypothetical protein\ Context:(NC_002946)-[990282-990482]\ Notes:Best Blastp Hit: gb AAF41815.1  (AE002495) hypothetical protein [Neisseria meningitidis MC58]                                                                                                                                                                                                                                                                                                                               |
| NGO1028 | 0.2743 | 1.82  | up   | 0.2065 | 1.57  | up   | 0.1888 | 1.50  | up   | transketolase\ Context:(NC_002946)+[990554-992533]\ Notes:catalyzes the formation of ribose 5-phosphate and xylulose 5-phosphate from sedoheptulose 7-phosphate and glyceraldehyde 3-phosphate; can transfer ketol groups between several groups; in Escherichia coli there are two tkt genes; tktA expressed during exponential growth and the tktB during stationary phase                                                                                                                 |
| NGO1029 | 0.0955 | 2.61  | up   | 0.0126 | 3.04  | up   | 0.0116 | 2.81  | up   | fumarate hydratase\ Context:(NC_002946)+[992677-994065]\ Notes:class II family (does not require metal); tetrameric enzyme; fumarase C; reversibly converts (S)-malate to fumarate and water; functions in the TCA cycle                                                                                                                                                                                                                                                                     |
| NGO1030 | 0.4078 | 1.58  | up   | 0.0100 | -3.25 | down | 0.5151 | -1.63 | down | hypothetical protein\ Context:(NC_002946)-[994130-995053]\ Notes:Best Blastp Hit: gb AAF41818.1  (AE002495) conserved hypothetical protein [Neisseria meningitidis MC58] COG0697 Predicted permeases                                                                                                                                                                                                                                                                                         |
| NGO1031 | 0.2099 | 1.78  | up   | 0.8063 | 1.12  | up   | 0.8570 | -1.06 | down | putative single-stranded DNA binding protein\ Context:(NC_002946)-[995426-995950]\ Notes:Best Blastp Hit: pir     A81080 single-strand binding protein NMB1460 [imported] - Neisseria meningitidis (group B strain MD58; group A strain Z2491) >gi 7226702 gb AAF41819.1  (AE002496) single-strand binding protein [Neisseria meningitidis MC58] >gi 7380314 emb CAB84900.1  (AL162756) single-stranded binding protein [Neisseria meningitidis] COG0629 Single-stranded DNA-binding protein |

|         |        |       |      |        |        |      |        |       |      |                                                                                                                                                                                                                                                                                                                                                   |
|---------|--------|-------|------|--------|--------|------|--------|-------|------|---------------------------------------------------------------------------------------------------------------------------------------------------------------------------------------------------------------------------------------------------------------------------------------------------------------------------------------------------|
| NGO1032 | 0.8398 | 1.11  | up   | 0.1641 | -2.06  | down | 0.2675 | -1.66 | down | hypothetical protein\ Context:(NC_002946)-[995954-997336]\ Notes:Best Blastp Hit: pir   B81080 drug resistance translocase family protein NMB1461 [imported] - Neisseria meningitidis (group B strain MD58) >gi 7226703 gb AAF41820.1  (AE002496) drug resistance translocase family protein [Neisseria meningitidis MC58] COG0477 Permeases      |
| NGO1033 | 0.0102 | -9.97 | down | 0.0276 | -4.18  | down | 0.1197 | -2.58 | down | putative transglycosylase\ Context:(NC_002946)-[997448-998071]\ Notes:Best Blastp Hit: pir   C81080 transglycosylase; probable NMB1462 [imported] - Neisseria meningitidis (group B strain MD58) >gi 7226704 gb AAF41821.1  (AE002496) transglycosylase; putative [Neisseria meningitidis MC58] COG0741 Soluble lytic murein transglycosylase and |
| NGO1034 | 0.1615 | -2.20 | down | 0.0342 | -8.49  | down | 0.6798 | -1.33 | down | hypothetical protein\ Context:(NC_002946)+[998126-998470]\ Notes:Best Blastp Hit: gb AAF42457.1  (AE002563) hypothetical protein [Neisseria meningitidis MC58]                                                                                                                                                                                    |
| NGO1037 | 0.0916 | -3.56 | down | 0.0255 | -6.02  | down | 0.6127 | -1.19 | down | hypothetical protein\ Context:(NC_002946)-[999363-999746]\ Notes:                                                                                                                                                                                                                                                                                 |
| NGO1040 | 0.6239 | 1.70  | up   | 0.0791 | -10.45 | down | 0.9598 | -1.07 | down | hypothetical protein\ Context:(NC_002946)+[1000964-1001692]\ Notes:Best Blastp Hit: gb AAF41823.1  (AE002496) conserved hypothetical protein [Neisseria meningitidis MC58]                                                                                                                                                                        |
| NGO1041 | 0.5365 | 1.57  | up   | 0.4876 | -1.67  | down | 0.6475 | 1.28  | up   | putative exopolyphosphatase\ Context:(NC_002946)+[1001855-1003363]\ Notes:Best Blastp Hit: pir   B81863 exopolyphosphatase (EC 3.6.1.-) NMA1679 [imported] - Neisseria meningitidis (group A strain Z2491) >gi 7380320 emb CAB84907.1  (AL162756) exopolyphosphatase [Neisseria meningitidis] COG0248 Exopolyphosphatase                          |
| NGO1042 | 0.5045 | -1.92 | down | 0.0084 | -9.90  | down | 0.4928 | -1.60 | down | hypothetical protein\ Context:(NC_002946)+[1003525-1003908]\ Notes:Best Blastp Hit: pir   C81863 probable membrane protein NMA1680 [imported] - Neisseria meningitidis (group A strain Z2491) >gi 7380321 emb CAB84908.1  (AL162756) putative membrane protein [Neisseria meningitidis]                                                           |
| NGO1043 | 0.1001 | 2.50  | up   | 0.2914 | 1.51   | up   | 0.3762 | 1.63  | up   | hypothetical protein\ Context:(NC_002946)-[1003573-1003917]\ Notes:                                                                                                                                                                                                                                                                               |

|         |        |       |      |        |       |      |        |       |      |                                                                                                                                                                                                                                                                                                                                                                                                                                                                 |
|---------|--------|-------|------|--------|-------|------|--------|-------|------|-----------------------------------------------------------------------------------------------------------------------------------------------------------------------------------------------------------------------------------------------------------------------------------------------------------------------------------------------------------------------------------------------------------------------------------------------------------------|
| NGO1044 | 0.6254 | 1.24  | up   | 0.4380 | 1.37  | up   | 0.4538 | 1.25  | up   | hypothetical protein\ Context:(NC_002946)-[1004234-1004779]\ Notes:Best Blastp Hit: pir   A81081 hypothetical protein NMB1470 [imported] - Neisseria meningitidis (group B strain MD58) >gi 7226710 gb AAF41827.1  (AE002496) hypothetical protein [Neisseria meningitidis MC58]                                                                                                                                                                                |
| NGO1045 | 0.3572 | 1.63  | up   | 0.3622 | 1.43  | up   | 0.3284 | 1.36  | up   | tryptophanyl-tRNA synthetase\ Context:(NC_002946)-[1004860-1005870]\ Notes:catalyzes a two-step reaction; first charging a tryptophan molecule by linking its carboxyl group to the alpha-phosphate of ATP; followed by transfer of the aminoacyl-adenylate to its tRNA                                                                                                                                                                                         |
| NGO1046 | 0.0895 | 4.78  | up   | 0.0745 | 12.57 | up   | 0.0737 | 7.76  | up   | putative ClpB protein\ Context:(NC_002946)+[1006130-1008709]\ Notes:Best Blastp Hit: pir   F81863 ClpB protein NMA1683 [imported] - Neisseria meningitidis (group A strain Z2491) >gi 7380324 emb CAB84911.1  (AL162756) ClpB protein [Neisseria meningitidis] COG0542 ATPases with chaperone activity; ATP-binding                                                                                                                                             |
| NGO1047 | 0.9797 | -1.02 | down | 0.2212 | -1.69 | down | 0.0387 | -2.07 | down | aminotransferase AlaT\ Context:(NC_002946)-[1008781-1009995]\ Notes:broad specificity; family IV; in Corynebacterium glutamicum this protein can use glutamate; 2-aminobutyrate; and aspartate as amino donors and pyruvate as the acceptor                                                                                                                                                                                                                     |
| NGO1048 | 0.5450 | -1.32 | down | 0.4299 | -1.55 | down | 0.9178 | -1.03 | down | hypothetical protein\ Context:(NC_002946)-[1010084-1010293]\ Notes:Best Blastp Hit: pir   H81078 4-oxalocrotonate tautomerase; probable NMB1474 [imported] - Neisseria meningitidis (group B strain MD58; group A strain Z2491) >gi 7226715 gb AAF41831.1  (AE002497) 4-oxalocrotonate tautomerase; putative [Neisseria meningitidis MC58] >gi 7380326 emb CAB84913.1  (AL162756) putative tautomerase [Neisseria meningitidis] COG1942 Uncharacterized protein |
| NGO1049 | 0.1643 | 2.36  | up   | 0.5929 | 1.22  | up   | 0.2950 | 1.38  | up   | hypothetical protein\ Context:(NC_002946)+[1010485-1011291]\ Notes:Best Blastp Hit: pir   A81079 conserved hypothetical protein NMB1475 [imported] - Neisseria meningitidis (group B strain MD58) >gi 7226716 gb AAF41832.1  (AE002497) conserved hypothetical protein [Neisseria meningitidis MC58]                                                                                                                                                            |
| NGO1051 | 0.8063 | -1.17 | down | 0.3904 | -2.19 | down | 0.1616 | 2.09  | up   | hypothetical protein\ Context:(NC_002946)+[1012691-1012930]\ Notes:                                                                                                                                                                                                                                                                                                                                                                                             |

|         |        |        |      |        |       |      |        |       |      |                                                                                                                                                                                                                                                                                                                                                                    |
|---------|--------|--------|------|--------|-------|------|--------|-------|------|--------------------------------------------------------------------------------------------------------------------------------------------------------------------------------------------------------------------------------------------------------------------------------------------------------------------------------------------------------------------|
| NGO1052 | 0.4299 | 1.48   | up   | 0.7533 | 1.14  | up   | 0.2606 | 1.40  | up   | phosphoglycolate phosphatase\<br>Context:(NC_002946)+[1012965-1013675]\ Notes:catalyzes the dephosphorylation of 2-phosphoglycolate to form glycolate and phosphate                                                                                                                                                                                                |
| NGO1053 | 0.3754 | -1.65  | down | 0.4339 | -1.37 | down | 0.6686 | -1.23 | down | recombination regulator RecX\<br>Context:(NC_002946)+[1013748-1014209]\ Notes:binds RecA and inhibits RecA-mediated DNA strand exchange and ATP hydrolysis and coprotease activities                                                                                                                                                                               |
| NGO1054 | 0.2110 | 3.51   | up   | 0.1973 | 2.42  | up   | 0.6386 | 1.27  | up   | hypothetical protein\<br>Context:(NC_002946)+[1014283-1014444]\ Notes:Best Blastp Hit: emb CAB84918.1 (AL162756) hypothetical protein [Neisseria meningitidis]                                                                                                                                                                                                     |
| NGO1055 | 0.0006 | -15.33 | down | 0.0009 | -8.61 | down | 0.0047 | -5.33 | down | putative acyl-CoA hydrolase\<br>Context:(NC_002946)+[1014597-1015079]\ Notes:Best Blastp Hit: pir G81079 acyl CoA thioester hydrolase family protein NMB1482 [imported] - Neisseria meningitidis (group B strain MD58) >gi 7226722 gb AAF41838.1 (AE002497) acyl CoA thioester hydrolase family protein [Neisseria meningitidis MC58] COG1607 Acyl-CoA hydrolase   |
| NGO1056 | 0.9863 | -1.01  | down | 0.8171 | -1.11 | down | 0.5665 | -1.32 | down | hypothetical protein\<br>Context:(NC_002946)-[1015477-1016688]\ Notes:Best Blastp Hit: gb AAF41839.1 (AE002497) lipoprotein NlpD; putative [Neisseria meningitidis MC58] COG0739 Membrane proteins related to                                                                                                                                                      |
| NGO1058 | 0.3412 | 1.83   | up   | 0.6103 | -1.30 | down | 0.3528 | 1.34  | up   | hypothetical protein\<br>Context:(NC_002946)-[1016592-1017338]\ Notes:Best Blastp Hit: pir B81077 stationary-phase survival protein SurE NMB1484 [imported] - Neisseria meningitidis (group B strain MD58) >gi 7226725 gb AAF41840.1 (AE002498) stationary-phase survival protein SurE [Neisseria meningitidis MC58] COG0496 Survival protein SurE; predicted acid |
| NGO1059 | 0.0571 | 3.30   | up   | 0.1738 | 1.68  | up   | 0.0415 | 2.50  | up   | hypothetical protein\<br>Context:(NC_002946)-[1017355-1018911]\ Notes:Best Blastp Hit: possibly phase variable - 8A residue homopolymer repeat in the coding sequence (ON) COG0861 Membrane protein TerC; possibly involved in                                                                                                                                     |

|         |        |       |      |        |       |      |        |       |      |                                                                                                                                                                                                                                                                                                                                                                                                                   |
|---------|--------|-------|------|--------|-------|------|--------|-------|------|-------------------------------------------------------------------------------------------------------------------------------------------------------------------------------------------------------------------------------------------------------------------------------------------------------------------------------------------------------------------------------------------------------------------|
| NGO1060 | 0.0402 | 5.11  | up   | 0.1503 | 1.85  | up   | 0.3345 | 1.30  | up   | FimB\ Context:(NC_002946)-[1019279-1020064]\<br>Notes:Best Blastp Hit: pir     E81077 fimbrial assembly protein NMB1487 [imported] - Neisseria meningitidis (group B strain MD58) >gi 7226728 gb AAF41843.1  (AE002498) fimbrial assembly protein [Neisseria meningitidis MC58]; putative fimbrial assembly protein                                                                                               |
| NGO1061 | 0.3213 | 2.24  | up   | 0.8374 | -1.13 | down | 0.8026 | -1.09 | down | putative succinate semialdehyde dehydrogenase\<br>Context:(NC_002946)-[1020175-1021608]\ Notes:Best Blastp Hit: pir     C81865 succinate-semialdehyde dehydrogenase (NAD(P)+) (EC 1.2.1.16) NMA1696 [imported] - Neisseria meningitidis (group A strain Z2491) >gi 7380337 emb CAB84924.1  (AL162756) succinate semialdehyde dehydrogenase [Neisseria meningitidis] COG1012 NAD-dependent aldehyde dehydrogenases |
| NGO1062 | 0.7252 | 1.16  | up   | 0.9050 | -1.05 | down | 0.7438 | 1.09  | up   | hypothetical protein\ Context:(NC_002946)+[1022009-1022803]\ Notes:Best Blastp Hit: pir     D81193 hypothetical protein NMB0488 [imported] - Neisseria meningitidis (group B strain MD58) >gi 7225715 gb AAF40923.1  (AE002405) hypothetical protein [Neisseria meningitidis MC58]                                                                                                                                |
| NGO1063 | 0.3051 | 1.73  | up   | 0.0716 | 2.30  | up   | 0.2572 | 1.56  | up   | hypothetical protein\ Context:(NC_002946)-[1022564-1022944]\ Notes:Best Blastp Hit: emb CAB84925.1  (AL162756) putative lipoprotein [Neisseria meningitidis]                                                                                                                                                                                                                                                      |
| NGO1064 | 0.1860 | -1.94 | down | 0.0296 | -3.13 | down | 0.0071 | -3.89 | down | hypothetical protein\ Context:(NC_002946)+[1023468-1025549]\ Notes:Best Blastp Hit: pir     C81078 carbon starvation protein A homolog NMB1493 [similarity] - Neisseria meningitidis (group B strain MD58) >gi 7226734 gb AAF41849.1  (AE002498) carbon starvation protein A [Neisseria meningitidis MC58] COG1966 Carbon starvation protein CstA; predicted                                                      |
| NGO1065 | 0.1310 | -2.34 | down | 0.0508 | -2.31 | down | 0.0120 | -2.74 | down | hypothetical protein\ Context:(NC_002946)+[1025539-1025733]\ Notes:Best Blastp Hit: gb AAF41850.1  (AE002498) conserved hypothetical protein [Neisseria meningitidis MC58] >gi 7380340 emb CAB84927.1  (AL162756) conserved hypothetical protein [Neisseria meningitidis]                                                                                                                                         |
| NGO1066 | 0.3288 | 1.71  | up   | 0.4568 | 1.36  | up   | 0.8118 | 1.08  | up   | MafI protein\ Context:(NC_002946)+[1025841-1026155]\<br>Notes:MafI1                                                                                                                                                                                                                                                                                                                                               |

|         |        |       |      |        |       |      |        |       |      |                                                                                                                                                                                                                                                                                                                                                                                                                           |
|---------|--------|-------|------|--------|-------|------|--------|-------|------|---------------------------------------------------------------------------------------------------------------------------------------------------------------------------------------------------------------------------------------------------------------------------------------------------------------------------------------------------------------------------------------------------------------------------|
| NGO1068 | 0.2933 | -1.57 | down | 0.4150 | -1.53 | down | 0.2730 | -1.88 | down | MafB2\ Context:(NC_002946)+[1027291-1028697]\<br>Notes:Best Blastp Hit: gb AAD31039.1 AF142582_3<br>(AF142582) adhesin MafB [Neisseria gonorrhoeae];<br>putative MafB-like protein                                                                                                                                                                                                                                        |
| NGO1069 | 0.1742 | 1.88  | up   | 0.7613 | 1.16  | up   | 0.2791 | 1.35  | up   | hypothetical protein\ Context:(NC_002946)+[1028713-<br>1029015]\ Notes:Best Blastp Hit: pir   E81004 hypothetical<br>protein NMB2113 [imported] - Neisseria meningitidis<br>(group B strain MD58; group A strain Z2491)<br>>gi 7227373 gb AAF42426.1  (AE002560) hypothetical<br>protein [Neisseria meningitidis MC58]<br>>gi 7379072 emb CAB83621.1  (AL162752) hypothetical<br>protein NMA0316 [Neisseria meningitidis] |
| NGO1070 | 0.3075 | 1.84  | up   | 0.3382 | 1.67  | up   | 0.4838 | 1.35  | up   | hypothetical protein\ Context:(NC_002946)+[1029707-<br>1030024]\ Notes:Best Blastp Hit: possibly phase variable -<br>8A residue homopolymer repeat in the coding sequence<br>(ON)                                                                                                                                                                                                                                         |
| NGO1072 | 0.0963 | 2.98  | up   | 0.0451 | 2.16  | up   | 0.8985 | 1.05  | up   | hypothetical protein\ Context:(NC_002946)+[1030403-<br>1030687]\ Notes:                                                                                                                                                                                                                                                                                                                                                   |
| NGO1073 | 0.1908 | 2.41  | up   | 0.2879 | 1.50  | up   | 0.6697 | 1.16  | up   | hypothetical protein\ Context:(NC_002946)+[1030690-<br>1031013]\ Notes:Best Blastp Hit: pir   F81004 hypothetical<br>protein NMB2115 [imported] - Neisseria meningitidis<br>(group B strain MD58) >gi 7227374 gb AAF42427.1 <br>(AE002560) hypothetical protein [Neisseria meningitidis<br>MC58]                                                                                                                          |
| NGO1074 | 0.4761 | 1.46  | up   | 0.5657 | 1.30  | up   | 0.8978 | -1.05 | down | MafI protein 2\ Context:(NC_002946)+[1031165-1031512]\<br>Notes:MafI2                                                                                                                                                                                                                                                                                                                                                     |
| NGO1077 | 0.4669 | 1.70  | up   | 0.4026 | 1.47  | up   | 0.6676 | -1.23 | down | hypothetical protein\ Context:(NC_002946)-[1035986-<br>1036333]\ Notes:                                                                                                                                                                                                                                                                                                                                                   |
| NGO1078 | 0.3800 | -1.52 | down | 0.4890 | -1.43 | down | 0.2205 | -2.06 | down | putative acyl-CoA hydrolase\<br>Context:(NC_002946)+[1036789-1037235]\ Notes:Best<br>Blastp Hit: pir   E81878 probable acyl-CoA hydrolase<br>NMA1121 [imported] - Neisseria meningitidis (group A<br>strain Z2491) >gi 7379815 emb CAB84383.1  (AL162755)<br>putative acyl-CoA hydrolase [Neisseria meningitidis]<br>COG1607 Acyl-CoA hydrolase                                                                           |



|         |        |       |      |        |        |      |        |       |      |                                                                                                                                                                                                                                                                                                                                                                     |
|---------|--------|-------|------|--------|--------|------|--------|-------|------|---------------------------------------------------------------------------------------------------------------------------------------------------------------------------------------------------------------------------------------------------------------------------------------------------------------------------------------------------------------------|
| NGO1079 | 0.0184 | -4.11 | down | 0.1822 | -2.84  | down | 0.1409 | -1.73 | down | putative oxidoreductase\ Context:(NC_002946)-[1037286-1038107]\ Notes:Best Blastp Hit: pir   D81878 probable oxidoreductase NMA1120 [imported] - Neisseria meningitidis (group A strain Z2491)<br>>gi 7379814 emb CAB84382.1  (AL162755) putative oxidoreductase [Neisseria meningitidis] COG0300 Short-chain dehydrogenases of various                             |
| NGO1080 | 0.0064 | -5.90 | down | 0.0489 | -4.92  | down | 0.1082 | -4.75 | down | putative C-type cytochrome\<br>Context:(NC_002946)+[1038226-1038684]\ Notes:Best Blastp Hit: emb CAB84381.1  (AL162755) putative C-type cytochrome [Neisseria meningitidis]                                                                                                                                                                                         |
| NGO1081 | 0.0659 | 2.97  | up   | 0.1358 | 1.89   | up   | 0.2470 | 1.60  | up   | alpha-2,3-sialyltransferase\ Context:(NC_002946)-[1038827-1039963]\ Notes:Best Blastp Hit: gb AAC44539.1  (U60664) alpha-2,3-sialyltransferase [Neisseria gonorrhoeae]                                                                                                                                                                                              |
| NGO1082 | 0.8775 | 1.09  | up   | 0.8572 | 1.07   | up   | 0.2685 | 1.41  | up   | putative isocitrate dehydrogenase\<br>Context:(NC_002946)+[1040336-1042561]\ Notes:Best Blastp Hit: possibly phase variable - 8A residue homopolymer repeat in the coding sequence (ON)                                                                                                                                                                             |
| NGO1083 | 0.3494 | -1.78 | down | 0.0356 | -5.01  | down | 0.3755 | -1.78 | down | hypothetical protein\ Context:(NC_002946)+[1042858-1043178]\ Notes:                                                                                                                                                                                                                                                                                                 |
| NGO1084 | 0.4321 | 1.68  | up   | 0.2580 | 4.35   | up   | 0.8863 | 1.22  | up   | hypothetical protein\ Context:(NC_002946)+[1044120-1044287]\ Notes:Best Blastp Hit: emb CAB84549.1  (AL162755) hypothetical protein NMA1297 [Neisseria meningitidis]                                                                                                                                                                                                |
| NGO1085 | 0.9171 | 1.08  | up   | 0.0323 | -4.16  | down | 0.7061 | -1.31 | down | putative phage associated protein\<br>Context:(NC_002946)+[1044447-1045292]\ Notes:Best Blastp Hit: sp P44189 YE18_HAEIN hypothetical protein HI1418 >gi 1074769 pir   A64029 hypothetical protein HI1418 - Haemophilus influenzae (strain Rd KW20)<br>>gi 1574254 gb AAC23068.1  (U32821) H. influenzae predicted coding region HI1418 [Haemophilus influenzae Rd] |
| NGO1086 | 0.0244 | -6.62 | down | 0.0004 | -10.84 | down | 0.2120 | -1.86 | down | putative phage associated protein\ Context:(NC_002946)-[1045279-1045479]\ Notes:Best Blastp Hit: gb AAF41392.1  (AE002449) hypothetical protein [Neisseria meningitidis MC58]                                                                                                                                                                                       |

|         |        |       |      |        |        |      |        |       |      |                                                                                                                                                                                                                                                                                                           |
|---------|--------|-------|------|--------|--------|------|--------|-------|------|-----------------------------------------------------------------------------------------------------------------------------------------------------------------------------------------------------------------------------------------------------------------------------------------------------------|
| NGO1087 | 0.5535 | -1.70 | down | 0.0528 | -10.47 | down | 0.9176 | -1.05 | down | putative phage associated protein\<br>Context:(NC_002946)+[1045494-1046174]\ Notes:Best Blastp Hit: pir     T32944 hypothetical protein W01B11.5 - Caenorhabditis elegans >gi   2804494   gb   AAB97600.1   (AF043704) similar to S. cerevisiae SLA2 (GB:Z22811) [Caenorhabditis elegans]                 |
| NGO1088 | 0.3786 | -2.46 | down | 0.0005 | -9.02  | down | 0.7141 | -1.55 | down | putative phage associated protein\<br>Context:(NC_002946)-[1046153-1046638]\ Notes:                                                                                                                                                                                                                       |
| NGO1089 | 0.3385 | -2.24 | down | 0.0052 | -13.76 | down | 0.1721 | -3.62 | down | putative phage associated protein\<br>Context:(NC_002946)-[1046644-1047117]\ Notes:                                                                                                                                                                                                                       |
| NGO1090 | 0.6201 | 1.40  | up   | 0.9884 | -1.01  | down | 0.9119 | -1.07 | down | putative phage associated protein\<br>Context:(NC_002946)-[1047173-1048468]\ Notes:Best Blastp Hit: gi   9632520 hypothetical protein [Bacteriophage 933W] >gi   9633449   ref   NP_050552.1   hypothetical protein [Bacteriophage VT2-Sa] >gi   4585431   gb   AAD25459.1                                |
| NGO1091 | 0.0086 | -5.84 | down | 0.0068 | -9.51  | down | 0.0251 | -3.80 | down | putative phage associated protein\<br>Context:(NC_002946)-[1048489-1048887]\ Notes:Best Blastp Hit: gb   AAF79659.1   AC025416_33 (AC025416) F5O11.3 [Arabidopsis thaliana]                                                                                                                               |
| NGO1092 | 0.9367 | 1.06  | up   | 0.0906 | -4.03  | down | 0.2595 | -1.96 | down | putative phage associated protein\<br>Context:(NC_002946)-[1049094-1055027]\ Notes:Best Blastp Hit: pir     A81819 hypothetical protein NMA1913 [imported] - Neisseria meningitidis (group A strain Z2491) >gi   7380547   emb   CAB85134.1   (AL162757) hypothetical protein [Neisseria meningitidis]    |
| NGO1093 | 0.0604 | 10.08 | up   | 0.4301 | -2.21  | down | 0.2722 | -3.27 | down | putative phage associated protein\<br>Context:(NC_002946)-[1055027-1056445]\ Notes:                                                                                                                                                                                                                       |
| NGO1094 | 0.5909 | 1.34  | up   | 0.3688 | -2.91  | down | 0.9395 | 1.08  | up   | putative phage associated protein\<br>Context:(NC_002946)-[1056442-1057638]\ Notes:Best Blastp Hit: emb   CAA42694.1   (X60098) M protein [Streptococcus sp.]                                                                                                                                             |
| NGO1095 | 0.0204 | 7.25  | up   | 0.2066 | -6.51  | down | 0.5845 | -2.28 | down | putative phage associated protein\<br>Context:(NC_002946)-[1057849-1058322]\ Notes:Best Blastp Hit: pir     H81143 hypothetical protein NMB0899 [imported] - Neisseria meningitidis (group B strain MD58) >gi   7226136   gb   AAF41307.1   (AE002442) hypothetical protein [Neisseria meningitidis MC58] |
| NGO1096 | 0.2695 | -3.36 | down | 0.0081 | -30.61 | down | 0.7850 | 1.18  | up   | putative phage associated protein\<br>Context:(NC_002946)-[1058422-1058637]\ Notes:                                                                                                                                                                                                                       |

|         |        |        |      |        |        |      |        |       |      |                                                                                                                                                                                                                                                                                                                                                                                                                                                                                                                 |
|---------|--------|--------|------|--------|--------|------|--------|-------|------|-----------------------------------------------------------------------------------------------------------------------------------------------------------------------------------------------------------------------------------------------------------------------------------------------------------------------------------------------------------------------------------------------------------------------------------------------------------------------------------------------------------------|
| NGO1097 | 0.7580 | 1.19   | up   | 0.0069 | -5.39  | down | 0.6968 | -1.36 | down | putative phage associated protein\ Context:(NC_002946)-[1058674-1060926]\ Notes:Best Blastp Hit: gi 9632518 putative portal protein [Bacteriophage 933W]<br>>gi 9633447 ref NP_050550.1  hypothetical protein [Bacteriophage VT2-Sa]<br>>gi 4585429 gb AAD25457.1 AF125520_52 (AF125520) putative portal protein [Bacteriophage 933W]<br>>gi 5881643 dbj BAA84334.1  (AP000363) hypothetical protein [Bacteriophage VT2-Sa]<br>>gi 7649880 dbj BAA94158.1  (AP000422) portal protein [Escherichia coli O157:H7] |
| NGO1098 | 0.5066 | 2.11   | up   | 0.2129 | -5.57  | down | 0.4024 | -1.98 | down | putative phage associated protein\ Context:(NC_002946)-[1060926-1062200]\ Notes:Best Blastp Hit: sp P44184 YE10_HAEIN hypothetical protein HI1410<br>>gi 1074763 pir  E64028 hypothetical protein HI1410 - Haemophilus influenzae (strain Rd KW20)<br>>gi 1574247 gb AAC23058.1  (U32820) H. influenzae predicted coding region HI1410 [Haemophilus influenzae Rd] COG1783 Phage terminase large subunit                                                                                                        |
| NGO1099 | 0.7481 | 1.29   | up   | 0.0230 | -4.68  | down | 0.5105 | -1.62 | down | putative phage associated protein\ Context:(NC_002946)-[1062181-1062423]\ Notes:                                                                                                                                                                                                                                                                                                                                                                                                                                |
| NGO1100 | 0.8479 | 1.20   | up   | 0.2223 | -3.57  | down | 0.4473 | -3.37 | down | putative phage associated protein\ Context:(NC_002946)-[1062478-1062720]\ Notes:                                                                                                                                                                                                                                                                                                                                                                                                                                |
| NGO1101 | 0.1339 | -2.95  | down | 0.0366 | -6.15  | down | 0.4493 | -1.35 | down | putative phage associated protein\ Context:(NC_002946)-[1062720-1063034]\ Notes:Best Blastp Hit: gb AAF53095.1  (AE003632) CG14926 gene product [Drosophila melanogaster]                                                                                                                                                                                                                                                                                                                                       |
| NGO1102 | 0.0064 | -11.71 | down | 0.0397 | -8.52  | down | 0.0850 | -2.94 | down | putative phage associated protein\ Context:(NC_002946)-[1063207-1063725]\ Notes:Best Blastp Hit: gb AAF24756.1  (AF148565) putative endonuclease [Streptococcus thermophilus bacteriophage ST3]                                                                                                                                                                                                                                                                                                                 |
| NGO1103 | 0.0171 | -6.15  | down | 0.0141 | -17.91 | down | 0.4444 | -2.28 | down | putative phage associated protein\ Context:(NC_002946)-[1063716-1064099]\ Notes:Best Blastp Hit: dbj BAA94132.1  (AP000422) hypothetical protein [Escherichia coli O157:H7]                                                                                                                                                                                                                                                                                                                                     |

|         |        |        |      |        |        |      |        |       |      |                                                                                                                                                                                                                                                                                                                                                                                                                                                                 |
|---------|--------|--------|------|--------|--------|------|--------|-------|------|-----------------------------------------------------------------------------------------------------------------------------------------------------------------------------------------------------------------------------------------------------------------------------------------------------------------------------------------------------------------------------------------------------------------------------------------------------------------|
| NGO1104 | 0.7582 | -1.29  | down | 0.1054 | -6.96  | down | 0.7592 | -1.30 | down | putative phage associated protein\ Context:(NC_002946)-[1064096-1064401]\ Notes:Best Blastp Hit: sp Q47271 YBCO_ECOLI hypothetical 10.3 KD protein IN EMRE-RUS INTERGENIC REGION >gi 2120252 pir  S66582 hypothetical protein 96 - phage 82 >gi 7467043 pir  C64787 ybcO protein                                                                                                                                                                                |
| NGO1105 | 0.0942 | -3.59  | down | 0.0858 | -6.28  | down | 0.3731 | -2.05 | down | putative phage associated protein\ Context:(NC_002946)+[1064373-1064993]\ Notes:                                                                                                                                                                                                                                                                                                                                                                                |
| NGO1106 | 0.2312 | 5.27   | up   | 0.3150 | 1.58   | up   | 0.8921 | -1.07 | down | putative phage associated protein\ Context:(NC_002946)-[1065119-1065268]\ Notes:                                                                                                                                                                                                                                                                                                                                                                                |
| NGO1107 | 0.1842 | -3.30  | down | 0.1710 | -4.96  | down | 0.6776 | 1.51  | up   | putative phage associated protein\ Context:(NC_002946)+[1065246-1065614]\ Notes:Best Blastp Hit: gb AAF41506.1  (AE002461) hypothetical protein [Neisseria meningitidis MC58]                                                                                                                                                                                                                                                                                   |
| NGO1108 | 0.2414 | 2.68   | up   | 0.1197 | -3.62  | down | 0.0148 | -5.59 | down | putative phage associated protein\ Context:(NC_002946)-[1065652-1066146]\ Notes:                                                                                                                                                                                                                                                                                                                                                                                |
| NGO1110 | 0.1921 | 2.32   | up   | 0.0448 | -4.04  | down | 0.9959 | 1.00  | up   | putative replicative DNA helicase; putative phage associated protein\ Context:(NC_002946)-[1066486-1067847]\ Notes:Best Blastp Hit: sp P37469 DNAC_BACSU replicative DNA helicase >gi 2127189 pir  S65970 replicative DNA helicase dnaC - Bacillus subtilis >gi 467330 dbj BAA05176.1  (D26185) replicative DNA helicase [Bacillus subtilis] >gi 2636591 emb CAB16081.1  (Z99124) replicative DNA helicase [Bacillus subtilis] COG0305 Replicative DNA helicase |
| NGO1111 | 0.0008 | -13.15 | down | 0.0263 | -15.77 | down | 0.6673 | -1.68 | down | putative phage associated protein\ Context:(NC_002946)-[1067844-1068974]\ Notes:Best Blastp Hit: gi 9634200 Gp54 [Bacteriophage HK97] >gi 6901629 gb AAF31132.1  (AF069529) Gp54 [Bacteriophage HK97]                                                                                                                                                                                                                                                           |
| NGO1115 | 0.0424 | 14.38  | up   | 0.0182 | -18.27 | down | 0.5138 | -2.64 | down | putative phage associated protein\ Context:(NC_002946)-[1069893-1070081]\ Notes:                                                                                                                                                                                                                                                                                                                                                                                |
| NGO1116 | 0.7611 | 1.18   | up   | 0.5903 | -1.27  | down | 0.2700 | -1.42 | down | putative phage repressor protein; putative phage associated protein\ Context:(NC_002946)+[1070260-1070907]\ Notes:Best Blastp Hit: gb AAF41318.1  (AE002442) transcriptional regulator [Neisseria meningitidis MC58]                                                                                                                                                                                                                                            |

|         |        |       |      |        |       |      |        |       |      |                                                                                                                                                                                                                                                                                                                                              |
|---------|--------|-------|------|--------|-------|------|--------|-------|------|----------------------------------------------------------------------------------------------------------------------------------------------------------------------------------------------------------------------------------------------------------------------------------------------------------------------------------------------|
| NGO1117 | 0.7928 | 1.14  | up   | 0.8353 | 1.10  | up   | 0.7474 | -1.09 | down | putative phage associated protein\<br>Context:(NC_002946)+[1071067-1071606]\ Notes:Best<br>Blastp Hit: gb AAF30438.1 AE002103_3 (AE002103)<br>hypothetical [Ureaplasma urealyticum]                                                                                                                                                          |
| NGO1118 | 0.5192 | 1.40  | up   | 0.7041 | 1.17  | up   | 0.8966 | 1.04  | up   | putative phage associated protein\<br>Context:(NC_002946)+[1071607-1071966]\ Notes:                                                                                                                                                                                                                                                          |
| NGO1119 | 0.1386 | -5.48 | down | 0.4268 | -2.57 | down | 0.4402 | -1.79 | down | putative phage associated protein\<br>Context:(NC_002946)-<br>[1071983-1072201]\ Notes:                                                                                                                                                                                                                                                      |
| NGO1120 | 0.7126 | 1.30  | up   | 0.0517 | 2.02  | up   | 0.9561 | 1.02  | up   | putative phage associated protein\<br>Context:(NC_002946)+[1072684-1072884]\ Notes:                                                                                                                                                                                                                                                          |
| NGO1123 | 0.3834 | 1.45  | up   | 0.0670 | 2.70  | up   | 0.5768 | 1.21  | up   | putative phage associated protein\<br>Context:(NC_002946)+[1073806-1074138]\ Notes:                                                                                                                                                                                                                                                          |
| NGO1124 | 0.1775 | 1.94  | up   | 0.1247 | 3.52  | up   | 0.9730 | 1.01  | up   | putative phage associated protein\<br>Context:(NC_002946)+[1074307-1074567]\ Notes:Best<br>Blastp Hit: gb AAF41312.1  (AE002442) hypothetical<br>protein [Neisseria meningitidis MC58]                                                                                                                                                       |
| NGO1128 | 0.3857 | 2.21  | up   | 0.7898 | 1.28  | up   | 0.6250 | -1.36 | down | putative phage associated protein\<br>Context:(NC_002946)+[1075799-1076290]\ Notes:Best<br>Blastp Hit: pir   T13296 hypothetical protein 8 -<br>Streptococcus phage phi-O1205<br>>gi 2444088 gb AAC79524.1  (U88974) ORF8<br>[Streptococcus thermophilus temperate bacteriophage<br>O1205]                                                   |
| NGO1131 | 0.1198 | -2.57 | down | 0.0804 | -3.22 | down | 0.3203 | -2.00 | down | putative phage associated protein\<br>Context:(NC_002946)+[1077648-1078061]\ Notes:                                                                                                                                                                                                                                                          |
| NGO1132 | 0.6610 | -1.59 | down | 0.2005 | -2.88 | down | 0.2591 | 1.47  | up   | putative phage associated protein\<br>Context:(NC_002946)+[1078087-1078281]\ Notes:                                                                                                                                                                                                                                                          |
| NGO1133 | 0.4332 | 1.47  | up   | 0.9693 | -1.02 | down | 0.9320 | -1.03 | down | hypothetical protein\<br>Context:(NC_002946)+[1078572-<br>1079246]\ Notes:Best Blastp Hit: pir   F81104 hypothetical<br>protein NMB1253 [imported] - Neisseria meningitidis<br>(group B strain MD58) >gi 7226493 gb AAF41633.1 <br>(AE002473) hypothetical protein [Neisseria meningitidis<br>MC58]                                          |
| NGO1134 | 0.3297 | 1.65  | up   | 0.9225 | -1.05 | down | 0.7450 | -1.13 | down | putative GTP cyclohydrolase II\<br>Context:(NC_002946)+[1079239-1079832]\ Notes:Best<br>Blastp Hit: pir   G81104 GTP cyclohydrolase II NMB1254<br>[imported] - Neisseria meningitidis (group B strain MD58)<br>>gi 7226494 gb AAF41634.1  (AE002473) GTP<br>cyclohydrolase II [Neisseria meningitidis MC58] COG0807<br>GTP cyclohydrolase II |

|         |        |       |      |        |        |      |        |       |      |                                                                                                                                                                                                                                                                                                                      |
|---------|--------|-------|------|--------|--------|------|--------|-------|------|----------------------------------------------------------------------------------------------------------------------------------------------------------------------------------------------------------------------------------------------------------------------------------------------------------------------|
| NGO1135 | 0.0546 | -9.36 | down | 0.0655 | -28.76 | down | 0.9264 | -1.08 | down | hypothetical protein\ Context:(NC_002946)-[1079913-1080224]\ Notes:                                                                                                                                                                                                                                                  |
| NGO1136 | 0.0859 | 2.74  | up   | 0.6963 | 1.17   | up   | 0.7439 | 1.11  | up   | hypothetical protein\ Context:(NC_002946)+[1079991-1080200]\ Notes:Best Blastp Hit: emb CAB87331.1  (AL163672) putative glycosyl transferase [Streptomyces coelicolor A3(2)] COG0463 Glycosyltransferases involved in cell wall                                                                                      |
| NGO1137 | 0.0696 | 3.15  | up   | 0.1104 | 1.92   | up   | 0.3629 | 1.35  | up   | Irg2\ Context:(NC_002946)+[1080185-1081147]\ Notes:Best Blastp Hit: gb AAC82509.1  (U65994) pilin gene inverting protein homolog PivNG [Neisseria gonorrhoeae]; putative invertase related gene 2; putative phage associated protein                                                                                 |
| NGO1143 | 0.0375 | 3.84  | up   | 0.0769 | 3.73   | up   | 0.2054 | 1.47  | up   | putative phage associated protein\ Context:(NC_002946)-[1085886-1086104]\ Notes:Best Blastp Hit: emb CAB84432.1  (AL162755) putative integral membrane protein [Neisseria meningitidis] >gi 7380631 emb CAB85221.1  (AL162757) hypothetical protein [Neisseria meningitidis]                                         |
| NGO1144 | 0.0906 | -7.64 | down | 0.0521 | -19.03 | down | 0.6785 | 1.51  | up   | putative phage associated protein\ Context:(NC_002946)-[1086190-1086393]\ Notes:Best Blastp Hit: emb CAB84063.1  (AL162754) hypothetical protein NMA0780 [Neisseria meningitidis]                                                                                                                                    |
| NGO1145 | 0.1228 | 7.98  | up   | 0.4395 | -3.80  | down | 0.6939 | -1.63 | down | putative phage associated protein\ Context:(NC_002946)-[1086407-1086718]\ Notes:Best Blastp Hit: pir F81922 hypothetical protein NMA0781 [imported] - Neisseria meningitidis (group A strain Z2491) >gi 7379502 emb CAB84064.1  (AL162754) hypothetical protein NMA0781 [Neisseria meningitidis]                     |
| NGO1146 | 0.3123 | -2.80 | down | 0.0287 | -14.56 | down | 0.5292 | 1.52  | up   | putative phage associated protein\ Context:(NC_002946)-[1086789-1088060]\ Notes:Best Blastp Hit: pir G81922 probable phage replication protein NMA0782 [imported] - Neisseria meningitidis (group A strain Z2491) >gi 7379503 emb CAB84065.1  (AL162754) putative phage replication protein [Neisseria meningitidis] |
| NGO1147 | 0.6787 | 1.47  | up   | 0.1493 | -9.31  | down | 0.5364 | 2.94  | up   | hypothetical protein\ Context:(NC_002946)-[1088047-1088271]\ Notes:Best Blastp Hit: emb CAB84066.1  (AL162754) hypothetical protein NMA0783 [Neisseria meningitidis]                                                                                                                                                 |

|         |        |       |      |        |       |      |        |       |      |                                                                                                                                                                                                                                                                                                                                                                                                                                              |
|---------|--------|-------|------|--------|-------|------|--------|-------|------|----------------------------------------------------------------------------------------------------------------------------------------------------------------------------------------------------------------------------------------------------------------------------------------------------------------------------------------------------------------------------------------------------------------------------------------------|
| NGO1148 | 0.7112 | 1.38  | up   | 0.2287 | 1.83  | up   | 0.7400 | 1.17  | up   | hypothetical protein\ Context:(NC_002946)-[1088667-1088873]\ Notes:Best Blastp Hit: emb CAB85032.1  (AL162757) hypothetical protein [Neisseria meningitidis]                                                                                                                                                                                                                                                                                 |
| NGO1149 | 0.9610 | 1.03  | up   | 0.2994 | 1.81  | up   | 0.5543 | 1.17  | up   | putative O-succinylhomoserine sulfhydrylase\ Context:(NC_002946)-[1088968-1090128]\ Notes:Best Blastp Hit: possibly phase variable - 8A residue homopolymer repeat in the coding sequence (ON) COG0626 Cystathionine                                                                                                                                                                                                                         |
| NGO1150 | 0.1438 | 2.66  | up   | 0.1275 | 2.91  | up   | 0.7833 | 1.07  | up   | hypothetical protein\ Context:(NC_002946)-[1090274-1091044]\ Notes:Best Blastp Hit: pir   F81806 hypothetical protein NMA1809 [imported] - Neisseria meningitidis (group A strain Z2491) >gi 7380448 emb CAB85034.1  (AL162757) hypothetical protein [Neisseria meningitidis]                                                                                                                                                                |
| NGO1151 | 0.3621 | -1.50 | down | 0.3160 | -1.59 | down | 0.8889 | 1.05  | up   | hypothetical protein\ Context:(NC_002946)+[1091146-1091397]\ Notes:Best Blastp Hit: gb AAF41963.1  (AE002511) hypothetical protein [Neisseria meningitidis MC58]                                                                                                                                                                                                                                                                             |
| NGO1152 | 0.6984 | 1.23  | up   | 0.7364 | -1.16 | down | 0.8094 | -1.08 | down | ABC transporter; periplasmic histidine-binding protein precursor\ Context:(NC_002946)+[1091449-1092255]\ Notes:Best Blastp Hit: sp Q06758 HISJ_NEIGO histidine-binding protein precursor (HBP) >gi 95363 pir   S19184 hypothetical protein - Neisseria gonorrhoeae >gi 49068 emb CAA45768.1  (X64421) gene homologous to hisJ (E.coli) and argT (S.typhimurium) [Neisseria gonorrhoeae] COG0834 Periplasmic amino acid binding proteins; Hbp |
| NGO1154 | 0.1023 | 2.89  | up   | 0.4191 | 1.66  | up   | 0.1109 | 1.62  | up   | potassium transporter peripheral membrane component\ Context:(NC_002946)+[1094183-1095595]\ Notes:involved in potassium uptake; found to be peripherally associated with the inner membrane in Escherichia coli; contains an NAD-binding domain                                                                                                                                                                                              |
| NGO1155 | 0.0110 | -7.62 | down | 0.0228 | -7.72 | down | 0.0998 | -4.30 | down | hypothetical protein\ Context:(NC_002946)-[1096079-1096537]\ Notes:Best Blastp Hit: pir   G64866 probable membrane protein b1202 - Escherichia coli >gi 1787452 gb AAC74286.1  (AE000218) putative adhesion and penetration protein [Escherichia coli]                                                                                                                                                                                       |

|         |        |       |      |        |        |      |        |       |      |                                                                                                                                                                                                                                                                                                                                |
|---------|--------|-------|------|--------|--------|------|--------|-------|------|--------------------------------------------------------------------------------------------------------------------------------------------------------------------------------------------------------------------------------------------------------------------------------------------------------------------------------|
| NGO1156 | 0.8734 | 1.07  | up   | 0.7177 | -1.20  | down | 0.8633 | 1.11  | up   | hypothetical protein\ Context:(NC_002946)-[1096627-1097481]\ Notes:Best Blastp Hit: pir   G64866 probable membrane protein b1202 - Escherichia coli >gi 1787452 gb AAC74286.1  (AE000218) putative adhesion and penetration protein [Escherichia coli]                                                                         |
| NGO1158 | 0.6503 | -1.23 | down | 0.7208 | 1.25   | up   | 0.4749 | -1.37 | down | hypothetical protein\ Context:(NC_002946)-[1098435-1099703]\ Notes:                                                                                                                                                                                                                                                            |
| NGO1159 | 0.0324 | -3.16 | down | 0.3049 | -1.71  | down | 0.7721 | -1.19 | down | hypothetical protein\ Context:(NC_002946)-[1100191-1100343]\ Notes:                                                                                                                                                                                                                                                            |
| NGO1160 | 0.4449 | -1.43 | down | 0.0840 | -2.67  | down | 0.7374 | -1.11 | down | phosphomethylpyrimidine kinase\ Context:(NC_002946)+[1100403-1101209]\ Notes:catalyzes the formation of 4-amino-2-methyl-5-diphosphomethylpyrimidine                                                                                                                                                                           |
| NGO1161 | 0.2318 | 1.93  | up   | 0.9060 | 1.06   | up   | 0.6185 | 1.21  | up   | tellurite resistance protein TehB\ Context:(NC_002946)-[1101267-1102136]\ Notes:with TehA confers resistance to tellurite                                                                                                                                                                                                      |
| NGO1162 | 0.8322 | 1.12  | up   | 0.4022 | 2.24   | up   | 0.1689 | -1.68 | down | ribonuclease H\ Context:(NC_002946)+[1102249-1102686]\ Notes:Best Blastp Hit: pir   F81807 ribonuclease H (EC 3.1.26.4)   NMA1817 [imported] - Neisseria meningitidis (group A strain Z2491) >gi 7380456 emb CAB85042.1  (AL162757) ribonuclease HI [Neisseria meningitidis] COG0328 Ribonuclease HI                           |
| NGO1163 | 0.8352 | 1.24  | up   | 0.1104 | 2.21   | up   | 0.9648 | -1.04 | down | hypothetical protein\ Context:(NC_002946)+[1102723-1102881]\ Notes:                                                                                                                                                                                                                                                            |
| NGO1173 | 0.0244 | -7.21 | down | 0.0436 | -11.28 | down | 0.3771 | -2.34 | down | putative DNA mismatch endonuclease; patch repair protein\ Context:(NC_002946)-[1110897-1111319]\ Notes:Best Blastp Hit: pir   H81959 patch repair protein (EC 3.1.-.-) NMA0429 [imported] - Neisseria meningitidis (group A strain Z2491) >gi 7379179 emb CAB83728.1  (AL162753) patch repair protein [Neisseria meningitidis] |
| NGO1176 | 0.0553 | -4.55 | down | 0.1931 | -5.70  | down | 0.4817 | 1.59  | up   | hypothetical protein\ Context:(NC_002946)+[1114327-1114473]\ Notes:                                                                                                                                                                                                                                                            |
| NGO1177 | 0.3608 | 1.54  | up   | 0.7006 | 1.18   | up   | 0.5856 | 1.18  | up   | hypothetical protein\ Context:(NC_002946)-[1114850-1115299]\ Notes:Best Blastp Hit: gb AAF62338.1  (AE002551) type IV pilin-related protein [Neisseria meningitidis MC58]                                                                                                                                                      |
| NGO1178 | 0.4277 | 1.61  | up   | 0.4689 | 1.35   | up   | 0.4227 | 1.25  | up   | ComE1\ Context:(NC_002946)-[1115387-1115686]\ Notes:COG1555 DNA uptake protein ComEA and related; DNA-binding competence protein 1                                                                                                                                                                                             |



|         |        |       |      |        |       |      |        |       |      |                                                                                                                                                                                                                                                                                                                                                                       |
|---------|--------|-------|------|--------|-------|------|--------|-------|------|-----------------------------------------------------------------------------------------------------------------------------------------------------------------------------------------------------------------------------------------------------------------------------------------------------------------------------------------------------------------------|
| NGO1179 | 0.7940 | -1.44 | down | 0.3001 | -3.78 | down | 0.3496 | 2.41  | up   | hypothetical protein\ Context:(NC_002946)+[1121383-1121601]\ Notes:Best Blastp Hit: emb CAB85400.1  (AL162758) hypothetical protein [Neisseria meningitidis]                                                                                                                                                                                                          |
| NGO1182 | 0.0175 | -3.76 | down | 0.0131 | -3.46 | down | 0.0223 | -3.66 | down | putative nitrogen regulatory protein P-II\ Context:(NC_002946)-[1123800-1124138]\ Notes:Best Blastp Hit: pir   B81019 nitrogen regulatory protein P-II NMB1995 [imported] - Neisseria meningitidis (group B strain MD58) >gi 7227257 gb AAF42322.1  (AE002548) nitrogen regulatory protein P-II [Neisseria meningitidis MC58] COG0347 Nitrogen regulatory protein PII |
| NGO1183 | 0.0055 | -6.42 | down | 0.0123 | -5.76 | down | 0.9647 | -1.04 | down | phosphoribosylformylglycinamide synthase\ Context:(NC_002946)+[1124290-1128246]\ Notes:catalyzes the formation of 2-(formamido)-N1-(5-phospho-D-ribose)acetamide from N2-formyl-N1-(5-phospho-D-ribose)glycinamide and L-glutamine in purine biosynthesis                                                                                                             |
| NGO1184 | 0.0568 | -4.21 | down | 0.0088 | -8.04 | down | 0.0086 | -4.78 | down | hypothetical protein\ Context:(NC_002946)-[1128345-1129463]\ Notes:Best Blastp Hit: pir   G75287 NADH oxidase-related protein - Deinococcus radiodurans (strain R1) >gi 6460144 gb AAF11879.1 AE002064_10 (AE002064) NADH oxidase-related protein [Deinococcus radiodurans] COG1902 NADH:flavin oxidoreductases; Old Yellow                                           |
| NGO1185 | 0.5803 | -1.40 | down | 0.0028 | -5.86 | down | 0.8086 | -1.26 | down | ArsR family transcriptional regulator\ Context:(NC_002946)-[1129602-1129913]\ Notes:Best Blastp Hit: pir   D70029 transcription regulator ArsR family homolog yvbA - Bacillus subtilis >gi 2635892 emb CAB15384.1  (Z99121) similar to transcriptional regulator (ArsR family) [Bacillus subtilis] COG0640 Predicted transcriptional regulators                       |
| NGO1186 | 0.0807 | -4.74 | down | 0.1856 | -4.85 | down | 0.4702 | -2.91 | down | hypothetical protein\ Context:(NC_002946)-[1129938-1130132]\ Notes:                                                                                                                                                                                                                                                                                                   |
| NGO1187 | 0.5893 | 1.32  | up   | 0.4719 | -1.35 | down | 0.6595 | 1.19  | up   | hypothetical protein\ Context:(NC_002946)+[1130145-1130897]\ Notes:Best Blastp Hit: emb CAB83742.1  (AL162753) putative hydroxyacylglutathione hydrolase [Neisseria meningitidis] COG0491 Zn-dependent hydrolases; including                                                                                                                                          |
| NGO1188 | 0.1179 | -3.17 | down | 0.0995 | -2.39 | down | 0.0134 | -2.69 | down | MgtE\ Context:(NC_002946)+[1131131-1132585]\ Notes:putative magnesium transporter                                                                                                                                                                                                                                                                                     |

|         |        |       |      |        |       |      |        |       |      |                                                                                                                                                                                                                                                                                                                                                                                  |
|---------|--------|-------|------|--------|-------|------|--------|-------|------|----------------------------------------------------------------------------------------------------------------------------------------------------------------------------------------------------------------------------------------------------------------------------------------------------------------------------------------------------------------------------------|
| NGO1189 | 0.2146 | -1.91 | down | 0.7345 | -1.41 | down | 0.4363 | -1.95 | down | Hsp33-like chaperonin\ Context:(NC_002946)-[1132671-1133579]\ Notes:becomes active under oxidative stress; four conserved cysteines bind a zinc atom when they are in the reduced state and the enzyme is inactive; oxidative stress results in oxidized cysteines; release of zinc; and binding of Hsp33 to aggregation-prone proteins; forms dimers and higher order oligomers |
| NGO1190 | 0.3993 | 1.64  | up   | 0.8626 | -1.07 | down | 0.5380 | 1.21  | up   | GNA2001\ Context:(NC_002946)+[1133860-1134492]\ Notes:Best Blastp Hit: gb AAF44765.1 AF235148_1 (AF235148) GNA2001 [Neisseria gonorrhoeae] >gi 7274424 gb AAF44767.1 AF235150_1 (AF235150) GNA2001 [Neisseria gonorrhoeae] COG0791 Cell wall-associated hydrolases; genome-derived Neisseria antigen 2001                                                                        |
| NGO1191 | 0.0792 | 4.96  | up   | 0.3966 | -1.79 | down | 0.9933 | -1.00 | down | hypothetical protein\ Context:(NC_002946)+[1134511-1134729]\ Notes:Best Blastp Hit: gb AAF42329.1  (AE002550) hypothetical protein [Neisseria meningitidis MC58] >gi 7379189 emb CAB83738.1  (AL162753) hypothetical protein [Neisseria meningitidis]                                                                                                                            |
| NGO1192 | 0.6778 | -1.37 | down | 0.0234 | -3.58 | down | 0.5666 | -1.33 | down | hypothetical protein\ Context:(NC_002946)+[1134874-1135218]\ Notes:Best Blastp Hit: pir   H81960 hypothetical inner membrane protein NMA0437 [imported] - Neisseria meningitidis (group A strain Z2491) >gi 7379187 emb CAB83736.1  (AL162753) hypothetical inner membrane protein [Neisseria meningitidis] COG1380 Predicted membrane protein; YohJ family                      |
| NGO1193 | 0.0288 | -4.87 | down | 0.0295 | -6.85 | down | 0.0093 | -5.67 | down | hypothetical protein\ Context:(NC_002946)+[1135218-1135910]\ Notes:Best Blastp Hit: pir   B81017 conserved hypothetical protein NMB2004 [imported] - Neisseria meningitidis (group B strain MD58) >gi 7227268 gb AAF42331.1  (AE002550) conserved hypothetical protein [Neisseria meningitidis MC58] COG1346 Predicted membrane protein; YohK family                             |

|         |        |       |      |        |       |      |        |       |      |                                                                                                                                                                                                                                                                                                                                                                                                                                       |
|---------|--------|-------|------|--------|-------|------|--------|-------|------|---------------------------------------------------------------------------------------------------------------------------------------------------------------------------------------------------------------------------------------------------------------------------------------------------------------------------------------------------------------------------------------------------------------------------------------|
| NGO1194 | 0.5845 | 1.41  | up   | 0.7657 | 1.13  | up   | 0.6382 | 1.25  | up   | bifunctional ornithine acetyltransferase/N-acetylglutamate synthase protein\ Context:(NC_002946)+[1135977-1137197]\ Notes:bifunctional arginine biosynthesis protein ArgJ; functions at the 1st and 5th steps in arginine biosynthesis; involved in synthesis of acetylglutamate from glutamate and acetyl-CoA and ornithine by transacetylation between acetylornithine and glutamate                                                |
| NGO1195 | 0.0756 | 3.73  | up   | 0.8512 | -1.21 | down | 0.3745 | 2.36  | up   | hypothetical protein\ Context:(NC_002946)+[1137257-1138666]\ Notes:Best Blastp Hit: >pir     D81017 chloride channel protein-related protein NMB2006 [imported] - Neisseria meningitidis (group B strain MD58; group A strain Z2491) gb AAF42333.1   (AE002550) chloride channel protein-related protein [Neisseria meningitidis MC58] emb CAB83733.1   (AL162753) hypothetical inner membrane protein [Neisseria meningitidis Z2491] |
| NGO1196 | 0.5819 | 1.53  | up   | 0.6049 | -1.52 | down | 0.1285 | 1.63  | up   | putative ATP-dependent DNA helicase related protein\ Context:(NC_002946)+[1138854-1140245]\ Notes:Best Blastp Hit: 0e+00 2213 95%/97% 501/463aa gi 7379183 emb CAB83732.1   (AL162753) ATP-dependent DNA helicase [Neisseria meningitidis] COG1643 HrpA-like helicases                                                                                                                                                                |
| NGO1197 | 0.0078 | 9.07  | up   | 0.1084 | 5.00  | up   | 0.4222 | 1.83  | up   | hypothetical protein\ Context:(NC_002946)+[1140196-1141815]\ Notes:Best Blastp Hit: possibly phase variable - 8A residue homopolymer repeat in the coding sequence (ON)                                                                                                                                                                                                                                                               |
| NGO1198 | 0.0035 | -5.81 | down | 0.0322 | -5.53 | down | 0.1913 | -2.58 | down | hypothetical protein\ Context:(NC_002946)+[1142045-1143619]\ Notes:Best Blastp Hit: gb AAF42335.1   (AE002550) YhbX/YhjW/YijP/YjdB family protein [Neisseria meningitidis MC58] COG2194 Predicted membrane-associated                                                                                                                                                                                                                 |
| NGO1199 | 0.4407 | -2.16 | down | 0.4482 | -2.12 | down | 0.1616 | 3.19  | up   | HrpA\ Context:(NC_002946)+[1143685-1146915]\ Notes:Best Blastp Hit: emb CAB83729.1   (AL162753) putative DNA helicase [Neisseria meningitidis] COG1643 HrpA-like helicases; putative ATP dependent DNA helicase                                                                                                                                                                                                                       |

|         |        |        |      |        |       |      |        |        |      |                                                                                                                                                                                                                                                                                                                                                                                                 |
|---------|--------|--------|------|--------|-------|------|--------|--------|------|-------------------------------------------------------------------------------------------------------------------------------------------------------------------------------------------------------------------------------------------------------------------------------------------------------------------------------------------------------------------------------------------------|
| NGO1201 | 0.0090 | -25.30 | down | 0.0908 | -5.99 | down | 0.0846 | -10.14 | down | hypothetical protein\ Context:(NC_002946)-[1148343-1148453]\ Notes:Best Blastp Hit: emb CAB84427.1  (AL162755) hypothetical protein NMA1165 [Neisseria meningitidis]                                                                                                                                                                                                                            |
| NGO1203 | 0.4222 | -1.51  | down | 0.4981 | -1.36 | down | 0.3778 | -1.30  | down | anthranilate phosphoribosyltransferase\ Context:(NC_002946)-[1149327-1150355]\ Notes:Catalyzes the conversion of N-(5-phospho-D-ribosyl)-anthranilate and diphosphate to anthranilate and 5-phospho-alpha-D-ribose 1-diphosphate                                                                                                                                                                |
| NGO1204 | 0.1293 | -2.06  | down | 0.0317 | -4.57 | down | 0.0421 | -3.37  | down | anthranilate synthase component II\ Context:(NC_002946)-[1150419-1151009]\ Notes:TrpG; with TrpE catalyzes the formation of anthranilate and glutamate from chorismate and glutamine; TrpG provides the glutamine amidotransferase activity                                                                                                                                                     |
| NGO1205 | 0.0756 | 2.80   | up   | 0.0687 | 3.44  | up   | 0.0923 | 1.71   | up   | putative TonB-dependent receptor protein\ Context:(NC_002946)+[1151402-1153696]\ Notes:Best Blastp Hit: emb CAB84423.1  (AL162755) putative outer-membrane receptor protein [Neisseria meningitidis] COG1629 Outer membrane receptor proteins; mostly Fe                                                                                                                                        |
| NGO1206 | 0.2603 | -2.01  | down | 0.8507 | 1.12  | up   | 0.8902 | -1.08  | down | phosphatidylserine decarboxylase\ Context:(NC_002946)-[1154088-1154867]\ Notes:catalyzes the decarboxylation of phosphatidyl-L-serine to phosphatidylethanolamine                                                                                                                                                                                                                               |
| NGO1207 | 0.0459 | 2.68   | up   | 0.9448 | 1.08  | up   | 0.4199 | 3.27   | up   | excinuclease ABC subunit A\ Context:(NC_002946)+[1155021-1157870]\ Notes:The UvrABC repair system catalyzes the recognition and processing of DNA lesions. UvrA is an ATPase and a DNA-binding protein. A damage recognition complex composed of 2 uvrA and 2 uvrB subunits scans DNA for abnormalities. When the presence of a lesion has been verified by uvrB; the uvrA molecules dissociate |
| NGO1208 | 0.6137 | -1.46  | down | 0.7162 | -1.32 | down | 0.7570 | -1.29  | down | NgoMIIM\ Context:(NC_002946)+[1157888-1158529]\ Notes:Best Blastp Hit: gb AAG17897.1 AF297971_1 (AF297971) restriction endonuclease R.NgoMIIM [Neisseria gonorrhoeae]                                                                                                                                                                                                                           |
| NGO1209 | 0.8784 | -1.09  | down | 0.2904 | 1.62  | up   | 0.4828 | -1.25  | down | DNA cytosine methyltransferase M.NgoMIIM\ Context:(NC_002946)+[1158533-1159666]\ Notes:Best Blastp Hit: possibly phase variable - two 8A residue homopolymer repeats in the the coding sequence (ON) COG0270 Site-specific DNA methylase dcm                                                                                                                                                    |

|         |        |       |      |        |       |      |        |       |      |                                                                                                                                                                                                                                                                                                                                                                                                       |
|---------|--------|-------|------|--------|-------|------|--------|-------|------|-------------------------------------------------------------------------------------------------------------------------------------------------------------------------------------------------------------------------------------------------------------------------------------------------------------------------------------------------------------------------------------------------------|
| NGO1212 | 0.2493 | 1.73  | up   | 0.5448 | 1.24  | up   | 0.3965 | 1.24  | up   | CTP synthetase\ Context:(NC_002946)-[1160954-1162588]\ Notes:CTP synthase; CTP synthase; cytidine triphosphate synthetase; catalyzes the ATP-dependent amination of UTP to CTP with either L-glutamine or ammonia as the source of nitrogen; in Escherichia coli this enzyme forms a homotetramer                                                                                                     |
| NGO1213 | 0.3446 | -1.76 | down | 0.4124 | -1.67 | down | 0.6330 | -1.43 | down | putative long-chain-fatty-acid--CoA-ligase\ Context:(NC_002946)-[1162700-1164370]\ Notes:Best Blastp Hit: pir     H81068 long-chain-fatty-acid--CoA ligase (EC 6.2.1.3) NMB1555 [similarity] - Neisseria meningitidis (group B strain MD58) >gi 7226802 gb AAF41909.1  (AE002506) long-chain-fatty-acid--CoA ligase [Neisseria meningitidis MC58] COG0318 Acyl-CoA synthetases (AMP-forming)/AMP-acid |
| NGO1214 | 0.0778 | -2.55 | down | 0.0257 | -3.57 | down | 0.1135 | -1.70 | down | tRNA(5-methylaminomethyl-2-thiouridylate)-methyltransferase\ Context:(NC_002946)-[1164441-1165592]\ Notes:Enables the biosynthesis of the modified nucleoside 5-methylaminomethyl-2-thiouridine present in the wobble position of some tRNAs                                                                                                                                                          |
| NGO1215 | 0.3129 | -1.65 | down | 0.4251 | -1.43 | down | 0.2289 | -2.11 | down | hypothetical protein\ Context:(NC_002946)-[1165669-1166142]\ Notes:Best Blastp Hit: pir     A81799 hypothetical protein NMA1745 [imported] - Neisseria meningitidis (group A strain Z2491) >gi 7380387 emb CAB84973.1  (AL162757) hypothetical protein NMA1745 [Neisseria meningitidis]                                                                                                               |
| NGO1216 | 0.2092 | -1.88 | down | 0.2472 | 1.72  | up   | 0.3153 | -1.91 | down | diacylglycerol kinase\ Context:(NC_002946)-[1166274-1166657]\ Notes:Best Blastp Hit: possibly phase variable - 8A residue homopolymer repeat in the coding sequence (ON) COG0818 Diacylglycerol kinase                                                                                                                                                                                                |
| NGO1217 | 0.0313 | 3.16  | up   | 0.0218 | 2.46  | up   | 0.2444 | 1.56  | up   | glutathione synthetase\ Context:(NC_002946)-[1166816-1167775]\ Notes:The second step in the glutathione biosynthesis pathway; where it synthesizes ATP + gamma-L-glutamyl-L-cysteine + glycine = ADP + phosphate + glutathione                                                                                                                                                                        |

|         |        |       |      |        |       |      |        |       |      |                                                                                                                                                                                                                                                                                                                                                                                             |
|---------|--------|-------|------|--------|-------|------|--------|-------|------|---------------------------------------------------------------------------------------------------------------------------------------------------------------------------------------------------------------------------------------------------------------------------------------------------------------------------------------------------------------------------------------------|
| NGO1218 | 0.6766 | 1.23  | up   | 0.3141 | 1.41  | up   | 0.7123 | 1.11  | up   | glutaminyl-tRNA synthetase\ Context:(NC_002946)-[1167864-1169585]\ Notes:catalyzes a two-step reaction; first charging a glutamine molecule by linking its carboxyl group to the alpha-phosphate of ATP; followed by transfer of the aminoacyl-adenylate to its tRNA                                                                                                                        |
| NGO1219 | 0.4413 | -1.53 | down | 0.0399 | -3.25 | down | 0.0324 | -3.61 | down | DeoR family transcriptional regulator\ Context:(NC_002946)-[1169664-1170437]\ Notes:Best Blastp Hit: gb AAF41915.1  (AE002506) transcriptional regulator; DeoR family [Neisseria meningitidis MC58] COG1349 Transcriptional regulators of sugar                                                                                                                                             |
| NGO1220 | 0.9974 | -1.00 | down | 0.0134 | -5.62 | down | 0.2194 | -2.30 | down | hypothetical protein\ Context:(NC_002946)-[1170480-1171382]\ Notes:Best Blastp Hit: pir   G81069 conserved hypothetical protein NMB1562 [imported] - Neisseria meningitidis (group B strain MD58) >gi 7226809 gb AAF41916.1  (AE002506) conserved hypothetical protein [Neisseria meningitidis MC58]                                                                                        |
| NGO1221 | 0.1577 | 2.15  | up   | 0.1539 | 1.91  | up   | 0.6157 | -1.25 | down | GntR family transcriptional regulator\ Context:(NC_002946)-[1171531-1172247]\ Notes:Best Blastp Hit: gb AAF41917.1  (AE002506) transcriptional regulator; GntR family [Neisseria meningitidis MC58] >gi 7380393 emb CAB84979.1  (AL162757) putative gntR-family transcriptional regulator [Neisseria meningitidis] COG1802 Transcriptional regulators; GntR family                          |
| NGO1222 | 0.0658 | 2.47  | up   | 0.0776 | 1.99  | up   | 0.5951 | 1.18  | up   | hypothetical protein\ Context:(NC_002946)-[1172769-1173119]\ Notes:Best Blastp Hit: pir   A81800 hypothetical protein NMA1753 [imported] - Neisseria meningitidis (group A strain Z2491) >gi 7380395 emb CAB84981.1  (AL162757) hypothetical protein [Neisseria meningitidis] COG1765 Uncharacterized ACR                                                                                   |
| NGO1223 | 0.0660 | 2.95  | up   | 0.2637 | 3.00  | up   | 0.6636 | 1.13  | up   | hypothetical protein\ Context:(NC_002946)-[1173309-1173980]\ Notes:Best Blastp Hit: pir   A81068 hypothetical protein NMB1565 [imported] - Neisseria meningitidis (group B strain MD58; group A strain Z2491) >gi 7226813 gb AAF41919.1  (AE002507) hypothetical protein [Neisseria meningitidis MC58] >gi 7380396 emb CAB84982.1  (AL162757) hypothetical protein [Neisseria meningitidis] |

|         |        |        |      |        |        |      |        |       |      |                                                                                                                                                                                                                                                                                                                                                                                                                |
|---------|--------|--------|------|--------|--------|------|--------|-------|------|----------------------------------------------------------------------------------------------------------------------------------------------------------------------------------------------------------------------------------------------------------------------------------------------------------------------------------------------------------------------------------------------------------------|
| NGO1224 | 0.1477 | 2.27   | up   | 0.5937 | 1.31   | up   | 0.4800 | 1.40  | up   | putativephosphoribosylglycinamidetransformylase\<br>Context:(NC_002946)-[1173996-1174622]\ Notes:Best<br>Blastp Hit: pir   C81800 phosphoribosylglycinamide<br>formyltransferase (EC 2.1.2.2) NMA1755 [imported] -<br>Neisseria meningitidis (group A strain Z2491)<br>>gi 7380397 emb CAB84983.1  (AL162757)<br>phosphoribosylglycinamide transformylase [Neisseria<br>meningitidis] COG0299 Folate-dependent |
| NGO1225 | 0.0792 | 2.98   | up   | 0.1714 | 1.82   | up   | 0.1613 | 1.78  | up   | putative peptidyl-prolylisomerase\<br>Context:(NC_002946)-<br>[1174729-1175547]\ Notes:Best Blastp Hit:<br>gb AAF41921.1  (AE002507) macrophage infectivity<br>potentiator [Neisseria meningitidis MC58] COG0545 FKBP-<br>type peptidyl-prolyl cis-trans                                                                                                                                                       |
| NGO1226 | 0.7727 | -1.19  | down | 0.7925 | 1.20   | up   | 0.7066 | 1.26  | up   | HolC\<br>Context:(NC_002946)-[1175807-1176247]\<br>Notes:Best Blastp Hit: pir   E81800 DNA-directed DNA<br>polymerase (EC 2.7.7.7) III chi chain NMA1757 [imported] -<br>Neisseria meningitidis (group A strain Z2491)<br>>gi 7380399 emb CAB84985.1  (AL162757) DNA<br>polymerase III chi subunit [Neisseria meningitidis]; putative<br>DNA polymerase III chi subunit                                        |
| NGO1227 | 0.6523 | 1.28   | up   | 0.7342 | 1.13   | up   | 0.7509 | 1.12  | up   | AmpA\<br>Context:(NC_002946)-[1176310-1177716]\<br>Notes:Best Blastp Hit: pir   F81800 leucyl aminopeptidase<br>(EC 3.4.11.1) NMA1758 [imported] - Neisseria meningitidis<br>(group A strain Z2491) >gi 7380400 emb CAB84986.1 <br>(AL162757) aminopeptidase A [Neisseria meningitidis]<br>COG0260 Leucyl aminopeptidase; putative aminopeptidase<br>A                                                         |
| NGO1228 | 0.0018 | -11.46 | down | 0.0128 | -12.99 | down | 0.4615 | -1.39 | down | hypothetical protein\<br>Context:(NC_002946)+[1177890-<br>1179005]\ Notes:Best Blastp Hit: emb CAB84987.1 <br>(AL162757) conserved integral membrane hypothetical<br>protein [Neisseria meningitidis] COG0795 Predicted<br>permeases                                                                                                                                                                           |
| NGO1229 | 0.5850 | 1.39   | up   | 0.6821 | -1.46  | down | 0.0898 | 3.65  | up   | hypothetical protein\<br>Context:(NC_002946)+[1179002-<br>1180072]\ Notes:Best Blastp Hit: emb CAB84988.1 <br>(AL162757) conserved hypothetical integral membrane<br>protein [Neisseria meningitidis] COG0795 Predicted<br>permeases                                                                                                                                                                           |
| NGO1230 | 0.5670 | -1.59  | down | 0.1514 | -11.30 | down | 0.7746 | 1.24  | up   | hypothetical protein\<br>Context:(NC_002946)+[1180077-<br>1180238]\ Notes:Best Blastp Hit: gb AAF42247.1 <br>(AE002540) conserved hypothetical protein [Neisseria<br>meningitidis MC58]                                                                                                                                                                                                                        |

|         |        |       |      |        |       |      |        |       |      |                                                                                                                                                                                                                                                                                                                                                                                                                                         |
|---------|--------|-------|------|--------|-------|------|--------|-------|------|-----------------------------------------------------------------------------------------------------------------------------------------------------------------------------------------------------------------------------------------------------------------------------------------------------------------------------------------------------------------------------------------------------------------------------------------|
| NGO1231 | 0.7214 | -1.22 | down | 0.7751 | -1.10 | down | 0.7805 | 1.13  | up   | bifunctional aconitate hydratase 2/2-methylisocitrate dehydratase\ Context:(NC_002946)+[1180387-1182972]\ Notes:catalyzes the conversion of citrate to isocitrate and the conversion of 2-methylaconitate to 2-methylisocitrate                                                                                                                                                                                                         |
| NGO1232 | 0.0053 | -8.67 | down | 0.0028 | -5.42 | down | 0.3209 | -2.40 | down | ornithine carbamoyltransferase\ Context:(NC_002946)+[1183114-1184109]\ Notes:catalyzes the formation of ornithine and carbamylphosphate from citrulline in the arginine catabolic pathway                                                                                                                                                                                                                                               |
| NGO1233 | 0.0972 | 2.84  | up   | 0.1010 | 1.81  | up   | 0.1476 | 2.10  | up   | ketol-acid reductoisomerase\ Context:(NC_002946)-[1184228-1185241]\ Notes:catalyzes the formation of (R)-2;3-dihydroxy-3-methylbutanoate from (S)-2-hydroxy-2-methyl-3-oxobutanoate in valine and isoleucine biosynthesis                                                                                                                                                                                                               |
| NGO1234 | 0.1450 | 2.29  | up   | 0.4266 | 1.42  | up   | 0.4327 | 1.27  | up   | hypothetical protein\ Context:(NC_002946)-[1185321-1185614]\ Notes:Best Blastp Hit: emb CAB84992.1  (AL162757) conserved hypothetical protein [Neisseria meningitidis] COG1359 Uncharacterized ACR; YneC family                                                                                                                                                                                                                         |
| NGO1235 | 0.0965 | 2.65  | up   | 0.4744 | 1.34  | up   | 0.4428 | 1.23  | up   | acetolactate synthase 3 regulatory subunit\ Context:(NC_002946)-[1185681-1186172]\ Notes:with IlvI catalyzes the formation of 2-acetolactate from pyruvate; the small subunit is required for full activity and valine sensitivity; E.coli produces 3 isoenzymes of acetolactate synthase which differ in specificity to substrates; valine sensitivity and affinity for cofactors; also known as acetolactate synthase 3 small subunit |
| NGO1236 | 0.6600 | 1.27  | up   | 0.7432 | 1.16  | up   | 0.7001 | 1.11  | up   | IlvI\ Context:(NC_002946)-[1186183-1187910]\ Notes:Best Blastp Hit: pir F81801 acetolactate synthase (EC 4.1.3.18) III large chain NMA1766 [imported] - Neisseria meningitidis (group A strain Z2491) >gi 7380408 emb CAB84994.1  (AL162757) acetolactate synthase isozyme III large subunit [Neisseria meningitidis] COG0028 Thiamine pyrophosphate-requiring enzymes; putative acetolactate synthase isozyme III large subunit        |



|         |        |       |      |        |       |      |        |      |    |                                                                                                                                                                                                                                                                                                                                                                                                      |
|---------|--------|-------|------|--------|-------|------|--------|------|----|------------------------------------------------------------------------------------------------------------------------------------------------------------------------------------------------------------------------------------------------------------------------------------------------------------------------------------------------------------------------------------------------------|
| NGO1237 | 0.2432 | 1.87  | up   | 0.6282 | 1.26  | up   | 0.4344 | 1.29 | up | hypothetical protein\ Context:(NC_002946)+[1188975-1189628]\ Notes:Best Blastp Hit: gb AAF41931.1  (AE002508) conserved hypothetical protein [Neisseria meningitidis MC58] COG1999 Uncharacterized protein SCO1/SenC/PrrC                                                                                                                                                                            |
| NGO1238 | 0.1649 | 1.93  | up   | 0.5528 | 1.31  | up   | 0.3867 | 1.32 | up | ATP phosphoribosyltransferase catalytic subunit\ Context:(NC_002946)+[1189707-1190372]\ Notes:short form of enzyme; requires HisZ for function; catalyzes the formation of N'-5'-phosphoribosyl-ATP from phosphoribosyl pyrophosphate; crucial role in histidine biosynthesis; forms heteromultimer of HisG and HisZ                                                                                 |
| NGO1239 | 0.0465 | 3.41  | up   | 0.0951 | 1.89  | up   | 0.3383 | 1.37 | up | hypothetical protein\ Context:(NC_002946)+[1190464-1191351]\ Notes:Best Blastp Hit: pir   D81067 hypothetical protein NMB1580; NMA1769 [imported] - Neisseria meningitidis (group B strain MD58; group A strain Z2491) >gi 7226828 gb AAF41933.1  (AE002508) hypothetical protein [Neisseria meningitidis MC58] >gi 7380411 emb CAB84997.1  (AL162757) hypothetical protein [Neisseria meningitidis] |
| NGO1240 | 0.0568 | 2.64  | up   | 0.0243 | 2.51  | up   | 0.0842 | 1.72 | up | histidinol dehydrogenase\ Context:(NC_002946)+[1191348-1192637]\ Notes:catalyzes the oxidation of L-histidinol to L-histidinaldehyde and then to L-histidine in histidine biosynthesis; functions as a dimer                                                                                                                                                                                         |
| NGO1241 | 0.0465 | 2.81  | up   | 0.0393 | 4.15  | up   | 0.0237 | 3.29 | up | histidinol-phosphate aminotransferase\ Context:(NC_002946)+[1192683-1193762]\ Notes:catalyzes the formation of L-histidinol phosphate from imidazole-acetol phosphate and glutamate in histidine biosynthesis                                                                                                                                                                                        |
| NGO1242 | 0.3404 | 1.75  | up   | 0.5403 | 1.25  | up   | 0.1391 | 1.60 | up | imidazoleglycerol-phosphate dehydratase\ Context:(NC_002946)+[1193956-1194690]\ Notes:catalyzes the dehydration of D-erythro-1-(imidazol-4-yl)glycerol 3-phosphate to 3-(imidazol-4-yl)-2-oxopropyl phosphate in histidine biosynthesis                                                                                                                                                              |
| NGO1243 | 0.4245 | -1.71 | down | 0.3006 | -1.57 | down | 0.9754 | 1.01 | up | hypothetical protein\ Context:(NC_002946)+[1194766-1195635]\ Notes:Best Blastp Hit: emb CAB85001.1  (AL162757) hypothetical protein [Neisseria meningitidis] COG2084 3-hydroxyisobutyrate dehydrogenase and                                                                                                                                                                                          |

|         |        |        |      |        |        |      |        |        |      |                                                                                                                                                                                                                                                                                                                                                                                                                                        |
|---------|--------|--------|------|--------|--------|------|--------|--------|------|----------------------------------------------------------------------------------------------------------------------------------------------------------------------------------------------------------------------------------------------------------------------------------------------------------------------------------------------------------------------------------------------------------------------------------------|
| NGO1244 | 0.0087 | 27.03  | up   | 0.4222 | -2.26  | down | 0.6310 | 1.78   | up   | MarR family transcriptional regulator\<br>Context:(NC_002946)+[1195870-1196301]\ Notes:Best Blastp Hit: gb AAF41938.1  (AE002509) transcriptional regulator; MarR family [Neisseria meningitidis MC58] COG1846 Transcriptional regulators; MarR/EmrR                                                                                                                                                                                   |
| NGO1245 | 0.5391 | -1.44  | down | 0.0056 | -11.26 | down | 0.1673 | -3.09  | down | hypothetical protein\<br>Context:(NC_002946)+[1196312-1197178]\ Notes:Best Blastp Hit: pir   D81065 hypothetical protein NMB1586 [imported] - Neisseria meningitidis (group B strain MD58) >gi 7226835 gb AAF41939.1  (AE002509) hypothetical protein [Neisseria meningitidis MC58]                                                                                                                                                    |
| NGO1246 | 0.6151 | 1.36   | up   | 0.0037 | -5.84  | down | 0.7040 | -1.28  | down | putative periplasmic protease\<br>Context:(NC_002946)-[1197229-1198281]\ Notes:SohB; periplasmic protein; member of the peptidase S49 family                                                                                                                                                                                                                                                                                           |
| NGO1247 | 0.0008 | -20.65 | down | 0.0168 | -6.94  | down | 0.1475 | -10.81 | down | hypothetical protein\<br>Context:(NC_002946)-[1199032-1199595]\ Notes:Best Blastp Hit: pir   C81803 CDPdiacylglycerol--glycerol-3-phosphate 3-phosphatidyltransferase (EC 2.7.8.5) NMA1779 [imported] - Neisseria meningitidis (group A strain Z2491) >gi 7380421 emb CAB85007.1  (AL162757) CDP-diacylglycerol--glycerol-3-phosphate 3-phosphatidyltransferase [Neisseria meningitidis] COG0558 Phosphatidylglycerophosphate synthase |
| NGO1248 | 0.1287 | -2.37  | down | 0.0056 | -14.09 | down | 0.1169 | -2.99  | down | hypothetical protein\<br>Context:(NC_002946)-[1199701-1200123]\ Notes:Best Blastp Hit: pir   E81803 hypothetical protein NMA1781 [imported] - Neisseria meningitidis (group A strain Z2491) >gi 7380423 emb CAB85009.1  (AL162757) hypothetical protein [Neisseria meningitidis]                                                                                                                                                       |
| NGO1249 | 0.0621 | -4.10  | down | 0.4699 | -1.45  | down | 0.1179 | -2.50  | down | hypothetical protein\<br>Context:(NC_002946)-[1200302-1200637]\ Notes:Best Blastp Hit: pir   H81065 conserved hypothetical protein NMB1590 [imported] - Neisseria meningitidis (group B strain MD58) >gi 7226839 gb AAF41943.1  (AE002509) conserved hypothetical protein [Neisseria meningitidis MC58] COG0599 Uncharacterized ACR; homolog                                                                                           |

|         |        |       |      |        |        |      |        |       |      |                                                                                                                                                                                                                                                                                                                                                                                                                                        |
|---------|--------|-------|------|--------|--------|------|--------|-------|------|----------------------------------------------------------------------------------------------------------------------------------------------------------------------------------------------------------------------------------------------------------------------------------------------------------------------------------------------------------------------------------------------------------------------------------------|
| NGO1250 | 0.7055 | -1.18 | down | 0.4082 | -1.49  | down | 0.5590 | -1.31 | down | mtrCDE transcriptional regulator; activator\<br>Context:(NC_002946)+[1200818-1201660]\ Notes:Best Blastp Hit: gb AAD44696.1 AF128630_1 (AF128630) MtrA [Neisseria gonorrhoeae] >gi 7228474 gb AAF42471.1 AF133676_1 (AF133676) MtrA [Neisseria gonorrhoeae] COG2207 AraC-type DNA-binding domain-containing                                                                                                                            |
| NGO1251 | 0.3106 | 1.78  | up   | 0.4584 | 1.37   | up   | 0.9898 | -1.00 | down | hypothetical protein\ Context:(NC_002946)-[1201722-1202300]\ Notes:Best Blastp Hit: pir   H81803 hypothetical protein NMA1784 [imported] - Neisseria meningitidis (group A strain Z2491) >gi 7380426 emb CAB85012.1  (AL162757) hypothetical protein [Neisseria meningitidis]                                                                                                                                                          |
| NGO1252 | 0.4143 | -1.80 | down | 0.0211 | -10.51 | down | 0.0677 | -4.41 | down | hypothetical protein\ Context:(NC_002946)+[1202358-1203260]\ Notes:Best Blastp Hit: emb CAB85013.1  (AL162757) conserved hypothetical integral membrane protein [Neisseria meningitidis] COG0697 Predicted permeases                                                                                                                                                                                                                   |
| NGO1253 | 0.0917 | 2.55  | up   | 0.0874 | 1.82   | up   | 0.2122 | 1.64  | up   | putative ABC transporter; periplasmic binding protein; polyamine\ Context:(NC_002946)-[1203301-1204431]\ Notes:Best Blastp Hit: pir   D81066 spermidine/putrescine ABC transporter; periplasmic spermidine/putrescine-binding protein NMB1594 [imported] - Neisseria meningitidis (group B strain MD58) >gi 7226843 gb AAF41947.1  (AE002509) spermidine/putrescine ABC transporter; periplasmic spermidine/putrescine-binding protein |
| NGO1254 | 0.1561 | 1.90  | up   | 0.7065 | 1.35   | up   | 0.2816 | 2.56  | up   | hypothetical protein\ Context:(NC_002946)+[1204635-1207259]\ Notes:Best Blastp Hit: pir   C81804 alanine--tRNA ligase (EC 6.1.1.7) NMA1788 [imported] - Neisseria meningitidis (group A strain Z2491) >gi 7380429 emb CAB85015.1  (AL162757) alanyl-tRNA synthetase [Neisseria meningitidis] COG0013 Alanyl-tRNA synthetase                                                                                                            |
| NGO1255 | 0.3150 | -5.44 | down | 0.3997 | -7.08  | down | 0.8508 | -1.39 | down | hypothetical protein\ Context:(NC_002946)+[1207321-1207662]\ Notes:Best Blastp Hit: pir   D81804 hypothetical protein NMA1789 [imported] - Neisseria meningitidis (group A strain Z2491) >gi 7380430 emb CAB85016.1  (AL162757) hypothetical protein [Neisseria meningitidis]                                                                                                                                                          |

|         |        |        |      |        |        |      |        |       |      |                                                                                                                                                                                                                                                                                                                                                                                                                                          |
|---------|--------|--------|------|--------|--------|------|--------|-------|------|------------------------------------------------------------------------------------------------------------------------------------------------------------------------------------------------------------------------------------------------------------------------------------------------------------------------------------------------------------------------------------------------------------------------------------------|
| NGO1257 | 0.0037 | -12.88 | down | 0.0018 | -14.27 | down | 0.0902 | -4.80 | down | hypothetical protein\ Context:(NC_002946)-[1209532-1209675]\ Notes:                                                                                                                                                                                                                                                                                                                                                                      |
| NGO1258 | 0.5536 | 1.39   | up   | 0.8535 | 1.08   | up   | 0.5219 | 1.26  | up   | phosphoglyceromutase\ Context:(NC_002946)-[1209692-1210375]\ Notes:catalyzes the interconversion of 2-phosphoglycerate to 3-phosphoglycerate                                                                                                                                                                                                                                                                                             |
| NGO1259 | 0.1039 | -2.72  | down | 0.0009 | -7.52  | down | 0.0083 | -4.26 | down | DNA topoisomerase IV subunit A\<br>Context:(NC_002946)+[1210524-1212827]\<br>Notes:decatenates newly replicated chromosomal DNA and relaxes positive and negative DNA supercoiling                                                                                                                                                                                                                                                       |
| NGO1260 | 0.1827 | 2.33   | up   | 0.9976 | 1.00   | up   | 0.8637 | 1.07  | up   | Rsp\ Context:(NC_002946)+[1212847-1214571]\<br>Notes:Best Blastp Hit: gb AAC82507.1  (U65994) Rsp [Neisseria gonorrhoeae] COG2204 AAA superfamily ATPases with N-terminal; putative transcriptional regulator                                                                                                                                                                                                                            |
| NGO1261 | 0.5749 | 1.40   | up   | 0.4138 | -2.31  | down | 0.9529 | 1.02  | up   | hypothetical protein\ Context:(NC_002946)+[1214671-1215423]\ Notes:Best Blastp Hit: sp P72077 YHIQ_NEIGO hypothetical 27.3 KD protein<br>>gi 3851182 gb AAC82508.1  (U65994) unknown [Neisseria gonorrhoeae] COG0500 SAM-dependent methyltransferases                                                                                                                                                                                    |
| NGO1273 | 0.0351 | -4.34  | down | 0.0080 | -4.98  | down | 0.0186 | -2.71 | down | hypothetical protein\ Context:(NC_002946)+[1224369-1224773]\ Notes:Best Blastp Hit: emb CAB85043.1  (AL162757) hypothetical protein [Neisseria meningitidis] COG0537 Diadenosine tetraphosphate (Ap4A)                                                                                                                                                                                                                                   |
| NGO1274 | 0.0049 | -6.02  | down | 0.0433 | -4.38  | down | 0.6989 | -1.35 | down | hypothetical protein\ Context:(NC_002946)+[1224813-1225994]\ Notes:Best Blastp Hit: pir H81807 conserved hypothetical protein NMA1819 [imported] - Neisseria meningitidis (group A strain Z2491)<br>>gi 6900400 emb CAB72012.1  (AJ391256) hypothetical protein [Neisseria meningitidis]<br>>gi 7380458 emb CAB85044.1  (AL162757) conserved hypothetical protein [Neisseria meningitidis] COG1619 Uncharacterized proteins; homologs of |
| NGO1275 | 0.1525 | -2.59  | down | 0.0900 | -4.67  | down | 0.9163 | 1.04  | up   | NorB\ Context:(NC_002946)-[1226096-1228207]\<br>Notes:Best Blastp Hit: emb CAB85109.1  (AL162757) nitric oxide reductase [Neisseria meningitidis]; putative nitric oxide reductase                                                                                                                                                                                                                                                       |

|         |        |       |      |        |       |      |        |       |      |                                                                                                                                                                                                                                                                                                                                                                                                                                                                                |
|---------|--------|-------|------|--------|-------|------|--------|-------|------|--------------------------------------------------------------------------------------------------------------------------------------------------------------------------------------------------------------------------------------------------------------------------------------------------------------------------------------------------------------------------------------------------------------------------------------------------------------------------------|
| NGO1276 | 0.1020 | -2.75 | down | 0.1060 | -7.85 | down | 0.3057 | -3.47 | down | AniA\ Context:(NC_002946)+[1228725-1229903]\<br>Notes:Best Blastp Hit: sp Q02219 ANIA_NEIGO major<br>outer membrane protein PAN 1 precursor<br>>gi 477564 pir   A49208 outer membrane protein Pan 1 -<br>Neisseria gonorrhoeae >gi 150277 gb AAA25462.1 <br>(M97926) major anaerobically induced outer membrane<br>protein [Neisseria gonorrhoeae]<br>>gi 258387 gb AAB23836.1  Pan 1=outer membrane<br>protein [Neisseria gonorrhoeae; Peptide; 392 aa]; nitrite<br>reductase |
| NGO1277 | 0.0105 | -7.76 | down | 0.3273 | -1.62 | down | 0.7206 | -1.23 | down | hypothetical protein\ Context:(NC_002946)+[1230081-<br>1230836]\ Notes:Best Blastp Hit: gb AAF62335.1 <br>(AE002513) hypothetical protein [Neisseria meningitidis<br>MC58] COG1262 Uncharacterized BCR                                                                                                                                                                                                                                                                         |
| NGO1279 | 0.6485 | 1.22  | up   | 0.5555 | 1.35  | up   | 0.2368 | 1.52  | up   | hypothetical protein\ Context:(NC_002946)-[1232381-<br>1232938]\ Notes:Best Blastp Hit: pir   E81059 conserved<br>hypothetical protein NMB1637 NMA1891 [imported] -<br>Neisseria meningitidis (group B strain MD58; group A strain<br>Z2491) >gi 2253229 gb AAC32673.1  (AF004820)<br>hypthetical proteinNitroreductase family proteins                                                                                                                                        |
| NGO1282 | 0.0317 | -3.32 | down | 0.0055 | -7.54 | down | 0.0661 | -3.10 | down | hypothetical protein\ Context:(NC_002946)-[1234709-<br>1235023]\ Notes:Best Blastp Hit: pir   G81059 hypothetical<br>protein NMB1639 [imported] - Neisseria meningitidis<br>(group B strain MD58) >gi 7226889 gb AAF41988.1 <br>(AE002514) hypothetical protein [Neisseria meningitidis<br>MC58]                                                                                                                                                                               |
| NGO1283 | 0.2170 | -2.83 | down | 0.1656 | -2.36 | down | 0.3459 | -1.31 | down | phosphoserine aminotransferase\ Context:(NC_002946)-<br>[1235044-1236150]\ Notes:catalyzes the formation of 3-<br>phosphonoxyppruvate and glutamate from O-phospho-L-<br>serine and 2-oxoglutarate; required both in major<br>phosphorylated pathway of serine biosynthesis and in the<br>biosynthesis of pyridoxine                                                                                                                                                           |
| NGO1284 | 0.7444 | -1.23 | down | 0.7052 | 1.21  | up   | 0.5723 | 1.24  | up   | hypothetical protein\ Context:(NC_002946)+[1236499-<br>1236948]\ Notes:in Streptococcus pneumoniae this gene<br>was found to be essential; structure determination of the<br>Streptococcus protein shows that it is similar to a number<br>of other proteins                                                                                                                                                                                                                   |

|         |        |         |      |        |         |      |        |        |      |                                                                                                                                                                                                                                                                                                                                                                                |
|---------|--------|---------|------|--------|---------|------|--------|--------|------|--------------------------------------------------------------------------------------------------------------------------------------------------------------------------------------------------------------------------------------------------------------------------------------------------------------------------------------------------------------------------------|
| NGO1285 | 0.7578 | -1.16   | down | 0.9871 | -1.01   | down | 0.9533 | -1.04  | down | transcription elongation factor NusA\<br>Context:(NC_002946)+[1236976-1238478]\ Notes:modifies transcription through interactions with RNA polymerase affecting elongation; readthrough; termination; and antitermination                                                                                                                                                      |
| NGO1286 | 0.0186 | 6.47    | up   | 0.0793 | 4.78    | up   | 0.0650 | 1.91   | up   | translation initiation factor IF-2\<br>Context:(NC_002946)+[1238490-1241321]\ Notes:Protects formylmethionyl-tRNA from spontaneous hydrolysis and promotes its binding to the 30S ribosomal subunits during initiation of protein synthesis. Also involved in the hydrolysis of GTP during the formation of the 70S ribosomal complex                                          |
| NGO1287 | 0.0421 | -6.16   | down | 0.0030 | -9.50   | down | 0.4044 | -2.83  | down | hypothetical protein\<br>Context:(NC_002946)-[1241481-1242821]\ Notes:Best Blastp Hit: pir   C81058 hypothetical protein NMB1644 [imported] - Neisseria meningitidis (group B strain MD58) >gi 7226895 gb AAF41993.1  (AE002515) hypothetical protein [Neisseria meningitidis MC58]                                                                                            |
| NGO1288 | 0.0350 | -4.38   | down | 0.0005 | -42.59  | down | 0.3147 | -2.34  | down | hypothetical protein\<br>Context:(NC_002946)-[1242895-1244235]\ Notes:Best Blastp Hit: pir   D81058 hypothetical protein NMB1645 [imported] - Neisseria meningitidis (group B strain MD58) >gi 7226896 gb AAF41994.1  (AE002515) hypothetical protein [Neisseria meningitidis MC58]                                                                                            |
| NGO1289 | 0.0127 | -3.98   | down | 0.0207 | -5.66   | down | 0.9573 | -1.04  | down | hypothetical protein\<br>Context:(NC_002946)+[1244378-1245004]\ Notes:Best Blastp Hit: pir   D81817 probable hemeolysin NMA1900 [imported] - Neisseria meningitidis (group A strain Z2491) >gi 7380534 emb CAB85121.1  (AL162757) putative haemolysin [Neisseria meningitidis] COG1272 Predicted membrane proteins; hemolysin                                                  |
| NGO1290 | 0.0001 | -101.04 | down | 0.0000 | -209.10 | down | 0.0052 | -20.49 | down | putative amino-acid transporter; sodium/alanine symporter\<br>Context:(NC_002946)-[1245069-1246487]\ Notes:Best Blastp Hit: pir   F81058 amino acid symporter; probable NMB1647 [imported] - Neisseria meningitidis (group B strain MD58) >gi 7226898 gb AAF41996.1  (AE002515) amino acid symporter; putative [Neisseria meningitidis MC58] COG1115 Sodium-alanine symporters |

|         |        |       |      |        |        |      |        |       |      |                                                                                                                                                                                                                                                                                                                                                                                       |
|---------|--------|-------|------|--------|--------|------|--------|-------|------|---------------------------------------------------------------------------------------------------------------------------------------------------------------------------------------------------------------------------------------------------------------------------------------------------------------------------------------------------------------------------------------|
| NGO1291 | 0.2686 | 1.79  | up   | 0.0945 | 1.76   | up   | 0.3763 | 1.43  | up   | hypothetical protein\ Context:(NC_002946)+[1246814-1247542]\ Notes:Best Blastp Hit: pir   F81817 conserved hypothetical protein NMA1902 [imported] - Neisseria meningitidis (group A strain Z2491)<br>>gi 7380536 emb CAB85123.1  (AL162757) conserved hypothetical protein [Neisseria meningitidis] COG0217 Uncharacterized ACR; YebC family                                         |
| NGO1292 | 0.0455 | -2.87 | down | 0.0326 | -7.80  | down | 0.2013 | -1.69 | down | Dsb\ Context:(NC_002946)-[1247601-1248089]\ Notes:Best Blastp Hit: gb AAF41998.1  (AE002515) disulfide bond formation protein B [Neisseria meningitidis MC58] COG1495 Disulfide bond formation protein DsbB; putative disulfide bond formation protein                                                                                                                                |
| NGO1293 | 0.1412 | 2.84  | up   | 0.0377 | -7.71  | down | 0.6717 | 1.57  | up   | hypothetical protein\ Context:(NC_002946)-[1248518-1248802]\ Notes:                                                                                                                                                                                                                                                                                                                   |
| NGO1294 | 0.0454 | -5.12 | down | 0.0008 | -22.04 | down | 0.0533 | -6.15 | down | AsnC family transcriptional regulator\ Context:(NC_002946)-[1249111-1249575]\ Notes:Best Blastp Hit: pir   A81059 leucine-responsive regulatory protein NMB1650 [imported] - Neisseria meningitidis (group B strain MD58)<br>>gi 7226901 gb AAF41999.1  (AE002515) leucine-responsive regulatory protein [Neisseria meningitidis MC58] COG1522 Transcriptional regulators; Lrp family |
| NGO1295 | 0.7967 | 1.19  | up   | 0.4587 | 1.37   | up   | 0.5366 | 1.21  | up   | hypothetical protein\ Context:(NC_002946)+[1249797-1250855]\ Notes:Best Blastp Hit: pir   B81818 alanine racemase (EC 5.1.1.1) NMA1906 [imported] - Neisseria meningitidis (group A strain Z2491)<br>>gi 7380540 emb CAB85127.1  (AL162757) alanine racemase [Neisseria meningitidis] COG0787 Alanine racemase                                                                        |
| NGO1296 | 0.0591 | -6.02 | down | 0.3076 | -5.46  | down | 0.7256 | -1.51 | down | hypothetical protein\ Context:(NC_002946)-[1251143-1251325]\ Notes:                                                                                                                                                                                                                                                                                                                   |
| NGO1297 | 0.2883 | -1.78 | down | 0.0499 | -2.88  | down | 0.2466 | -1.38 | down | hypothetical protein\ Context:(NC_002946)-[1251397-1252752]\ Notes:Best Blastp Hit: pir   E81818 conserved hypothetical protein NMA1908 [imported] - Neisseria meningitidis (group A strain Z2491)<br>>gi 7380543 emb CAB85130.1  (AL162757) conserved hypothetical protein [Neisseria meningitidis]                                                                                  |
| NGO1298 | 0.4458 | 1.49  | up   | 0.1505 | 2.10   | up   | 0.8675 | 1.07  | up   | hypothetical protein\ Context:(NC_002946)-[1252767-1253039]\ Notes:ACT domain-containing protein                                                                                                                                                                                                                                                                                      |

|         |        |       |      |        |        |      |        |       |      |                                                                                                                                                                                                                                                                                                                                                                                                                                      |
|---------|--------|-------|------|--------|--------|------|--------|-------|------|--------------------------------------------------------------------------------------------------------------------------------------------------------------------------------------------------------------------------------------------------------------------------------------------------------------------------------------------------------------------------------------------------------------------------------------|
| NGO1299 | 0.1718 | 2.40  | up   | 0.1851 | 1.97   | up   | 0.9481 | -1.02 | down | hypothetical protein\ Context:(NC_002946)-[1253164-1253901]\ Notes:Best Blastp Hit: pir    E81057 conserved hypothetical protein NMB1654 [imported] - Neisseria meningitidis (group B strain MD58) >gi 7226906 gb AAF42003.1  (AE002516) conserved hypothetical protein [Neisseria meningitidis MC58]                                                                                                                                |
| NGO1300 | 0.5252 | -1.44 | down | 0.1874 | -2.04  | down | 0.1915 | -1.88 | down | N5-glutamine S-adenosyl-L-methionine-dependent methyltransferase\ Context:(NC_002946)-[1254039-1254950]\ Notes:involved in methylation of ribosomal protein L3                                                                                                                                                                                                                                                                       |
| NGO1301 | 0.7016 | 1.38  | up   | 0.0932 | -12.80 | down | 0.5223 | 1.53  | up   | hypothetical protein\ Context:(NC_002946)+[1255045-1255755]\ Notes:Best Blastp Hit: pir    A81819 hypothetical protein NMA1913 [imported] - Neisseria meningitidis (group A strain Z2491) >gi 7380547 emb CAB85134.1  (AL162757) hypothetical protein [Neisseria meningitidis]                                                                                                                                                       |
| NGO1306 | 0.3691 | 1.49  | up   | 0.6250 | 1.18   | up   | 0.6776 | -1.13 | down | hypothetical protein\ Context:(NC_002946)-[1263560-1263847]\ Notes:Best Blastp Hit: possibly phase variable - 8G residue homopolymer repeat in the coding sequence (ON)                                                                                                                                                                                                                                                              |
| NGO1307 | 0.1072 | 2.92  | up   | 0.0655 | 1.96   | up   | 0.4963 | 1.24  | up   | putative flavoprotein\ Context:(NC_002946)+[1263920-1265104]\ Notes:Best Blastp Hit: pir    D81819 hypothetical protein NMA1916 [imported] - Neisseria meningitidis (group A strain Z2491) >gi 7380550 emb CAB85137.1  (AL162757) hypothetical protein [Neisseria meningitidis] COG0452 Flavoprotein involved in panthothenate                                                                                                       |
| NGO1308 | 0.0105 | 6.79  | up   | 0.0329 | 9.45   | up   | 0.2911 | 2.04  | up   | putativeguanosine-3';5'-bis(diphosphate)3'-pyrophosphohydrolase\ Context:(NC_002946)-[1265171-1267327]\ Notes:Best Blastp Hit: pir    B81058 guanosine-3';5'-bis(diphosphate) 3'-pyrophosphohydrolase NMB1659 [imported] - Neisseria meningitidis (group B strain MD58) >gi 7226911 gb AAF42008.1  (AE002516) guanosine-3';5'-bis(diphosphate) 3'-pyrophosphohydrolase [Neisseria meningitidis MC58] COG0317 Guanosine polyphosphate |



|         |        |        |      |        |        |      |        |       |      |                                                                                                                                                                                                                                                                                                                                               |
|---------|--------|--------|------|--------|--------|------|--------|-------|------|-----------------------------------------------------------------------------------------------------------------------------------------------------------------------------------------------------------------------------------------------------------------------------------------------------------------------------------------------|
| NGO1309 | 0.3487 | 1.71   | up   | 0.5931 | 1.24   | up   | 0.3476 | 1.42  | up   | hypothetical protein\ Context:(NC_002946)-[1267420-1267626]\ Notes:Best Blastp Hit: gb AAF42009.1  (AE002517) DNA-directed RNA polymerase; omega subunit [Neisseria meningitidis MC58] >gi 7380552 emb CAB85139.1  (AL162757) DNA-directed RNA polymerase omega chain [Neisseria meningitidis] COG1758 RNA polymerase-associated protein RpoZ |
| NGO1310 | 0.7962 | 1.14   | up   | 0.9974 | 1.00   | up   | 0.7361 | -1.10 | down | KguA\ Context:(NC_002946)-[1267684-1268301]\ Notes:Best Blastp Hit: pir   G81819 guanylate kinase (EC 2.7.4.8) NMA1919 [imported] - Neisseria meningitidis (group A strain Z2491) >gi 7380553 emb CAB85140.1  (AL162757) guanylate kinase [Neisseria meningitidis] COG0194 Guanylate kinase; putative guanylate kinase                        |
| NGO1311 | 0.3499 | 1.81   | up   | 0.1075 | 2.51   | up   | 0.6767 | 1.13  | up   | adenine phosphoribosyltransferase\ Context:(NC_002946)+[1268429-1269028]\ Notes:catalyzes a salvage reaction resulting in the formation of AMP which is metabolically less costly than a de novo synthesis                                                                                                                                    |
| NGO1312 | 0.0357 | 3.48   | up   | 0.4243 | 1.61   | up   | 0.4020 | -1.48 | down | hypothetical protein\ Context:(NC_002946)-[1269074-1269883]\ Notes:Best Blastp Hit: emb CAB85142.1  (AL162757) conserved hypothetical protein [Neisseria meningitidis] COG0561 Predicted hydrolases of the HAD superfamily                                                                                                                    |
| NGO1313 | 0.0129 | -14.23 | down | 0.1499 | -27.47 | down | 0.7497 | -1.70 | down | hypothetical protein\ Context:(NC_002946)+[1269916-1270026]\ Notes:Best Blastp Hit: emb CAB85143.1  (AL162757) hypothetical protein [Neisseria meningitidis]                                                                                                                                                                                  |
| NGO1314 | 0.4387 | -1.62  | down | 0.6588 | -1.30  | down | 0.6081 | 1.37  | up   | putative protease\ Context:(NC_002946)+[1270187-1271542]\ Notes:Best Blastp Hit: pir   B81056 proteinase; probable NMB1664 [imported] - Neisseria meningitidis (group B strain MD58) >gi 7226917 gb AAF42013.1  (AE002517) protease; putative [Neisseria meningitidis MC58] COG0826 Protease related to collagenase                           |

|         |        |        |      |        |        |      |        |       |      |                                                                                                                                                                                                                                                                                                                                                                                                                                                      |
|---------|--------|--------|------|--------|--------|------|--------|-------|------|------------------------------------------------------------------------------------------------------------------------------------------------------------------------------------------------------------------------------------------------------------------------------------------------------------------------------------------------------------------------------------------------------------------------------------------------------|
| NGO1315 | 0.3159 | -1.71  | down | 0.6492 | 1.22   | up   | 0.6267 | -1.29 | down | hypothetical protein\ Context:(NC_002946)+[1271673-1272146]\ Notes:Best Blastp Hit: pir    D81820 hypothetical protein NMA1924 [imported] - Neisseria meningitidis (group A strain Z2491) >gi 7380558 emb CAB85145.1  (AL162757) hypothetical protein [Neisseria meningitidis]                                                                                                                                                                       |
| NGO1318 | 0.1800 | 2.20   | up   | 0.1381 | 2.12   | up   | 0.0599 | 2.22  | up   | hypothetical protein\ Context:(NC_002946)-[1275619-1276311]\ Notes:Best Blastp Hit: pir    E81820 heme utilisation protein NMA1927 [imported] - Neisseria meningitidis (group A strain Z2491) >gi 6692578 gb AAF24745.1 AF133695_1 (AF133695) HemO [Neisseria meningitidis] >gi 7380559 emb CAB85147.1  (AL162757) haem utilisation protein [Neisseria meningitidis]                                                                                 |
| NGO1319 | 0.0009 | -12.25 | down | 0.0178 | -11.41 | down | 0.4998 | -1.49 | down | PqiA\ Context:(NC_002946)+[1276589-1277893]\ Notes:Best Blastp Hit: pir    F81820 hypothetical integral membrane protein NMA1928 [imported] - Neisseria meningitidis (group A strain Z2491) >gi 7380560 emb CAB85148.1  (AL162757) hypothetical integral membrane protein [Neisseria meningitidis]; putative paraquat-inducible protein A                                                                                                            |
| NGO1320 | 0.0017 | 10.63  | up   | 0.2735 | 2.72   | up   | 0.2232 | 3.26  | up   | PqiB\ Context:(NC_002946)+[1277886-1279547]\ Notes:Best Blastp Hit: pir    A81057 hypothetical integral membrane protein pqiB NMA1929 [imported] - Neisseria meningitidis (group B strain MD58; group A strain Z2491) >gi 7226924 gb AAF42020.1  (AE002517) pqiB protein [Neisseria meningitidis MC58] >gi 7380561 emb CAB85149.1  (AL162757) hypothetical integral membrane protein [Neisseria meningitidis]; putative paraquat-inducible protein B |
| NGO1321 | 0.0206 | 4.89   | up   | 0.0225 | 16.27  | up   | 0.0413 | 4.42  | up   | hypothetical protein\ Context:(NC_002946)+[1279547-1280065]\ Notes:Best Blastp Hit: pir    H81820 probable lipoprotein NMA1930 [imported] - Neisseria meningitidis (group A strain Z2491) >gi 7380562 emb CAB85150.1  (AL162757) putative lipoprotein [Neisseria meningitidis]                                                                                                                                                                       |

|         |        |       |      |        |       |      |        |       |      |                                                                                                                                                                                                                                                                                                                                               |
|---------|--------|-------|------|--------|-------|------|--------|-------|------|-----------------------------------------------------------------------------------------------------------------------------------------------------------------------------------------------------------------------------------------------------------------------------------------------------------------------------------------------|
| NGO1322 | 0.2221 | 2.28  | up   | 0.1639 | 8.27  | up   | 0.0991 | 14.06 | up   | putative DNA-3-methyladenine glycosylase I \ Context:(NC_002946)+[1280069-1280620] \ Notes:Best Blastp Hit: pir   A81821 DNA-3-methyladenine glycosidase I (EC 3.2.2.20) NMA1931 [imported] - Neisseria meningitidis (group A strain Z2491) >gi 7380563 emb CAB85151.1  (AL162757) DNA-3-methyladenine glycosylase I [Neisseria meningitidis] |
| NGO1323 | 0.0144 | 6.21  | up   | 0.0747 | 6.06  | up   | 0.0642 | 6.12  | up   | hypothetical protein \ Context:(NC_002946)+[1280610-1281251] \ Notes:Best Blastp Hit: gb AAF42023.1  (AE002517) GDSL lipase family protein [Neisseria meningitidis MC58] >gi 7380564 emb CAB85152.1  (AL162757) putative lipase [Neisseria meningitidis]                                                                                      |
| NGO1324 | 0.0535 | 3.99  | up   | 0.3958 | 2.34  | up   | 0.6143 | 1.16  | up   | hypothetical protein \ Context:(NC_002946)+[1281422-1281781] \ Notes:Best Blastp Hit: pir   C81821 probable integral membrane protein NMA1933 [imported] - Neisseria meningitidis (group A strain Z2491) >gi 7380565 emb CAB85153.1  (AL162757) putative integral membrane protein [Neisseria meningitidis]                                   |
| NGO1325 | 0.9925 | -1.01 | down | 0.0281 | -3.91 | down | 0.5376 | 1.59  | up   | glycine dehydrogenase \ Context:(NC_002946)+[1281812-1284664] \ Notes:acts in conjunction with GvcH to form H-protein-S-aminomethyl dihydro lipoyllysine from glycine                                                                                                                                                                         |
| NGO1327 | 0.1411 | 8.82  | up   | 0.9825 | 1.03  | up   | 0.8012 | -1.39 | down | hypothetical protein \ Context:(NC_002946)+[1285805-1285942] \ Notes:Best Blastp Hit: emb CAB85155.1  (AL162757) hypothetical protein [Neisseria meningitidis]                                                                                                                                                                                |
| NGO1328 | 0.0091 | -4.77 | down | 0.0263 | -4.26 | down | 0.0027 | -3.61 | down | putative cytochrome \ Context:(NC_002946)-[1286026-1286865] \ Notes:Best Blastp Hit: gb AAF42025.1  (AE002518) cytochrome c5 [Neisseria meningitidis MC58]                                                                                                                                                                                    |
| NGO1329 | 0.6497 | -1.42 | down | 0.5130 | 1.43  | up   | 0.7524 | -1.17 | down | aromatic amino acid aminotransferase \ Context:(NC_002946)-[1287290-1288483] \ Notes:catalyzes the formation of L-glutamate and an aromatic oxo acid from an aromatic amino acid and 2-oxoglutarate                                                                                                                                           |
| NGO1330 | 0.4425 | 1.55  | up   | 0.8343 | 1.19  | up   | 0.1649 | -1.75 | down | tRNA (uracil-5-)-methyltransferase \ Context:(NC_002946)-[1288503-1289591] \ Notes:catalyzes the formation of 5-methyl-uridine at position 54 in all tRNAs                                                                                                                                                                                    |

|         |        |       |      |        |       |      |        |       |      |                                                                                                                                                                                                                                                                                                                                        |
|---------|--------|-------|------|--------|-------|------|--------|-------|------|----------------------------------------------------------------------------------------------------------------------------------------------------------------------------------------------------------------------------------------------------------------------------------------------------------------------------------------|
| NGO1331 | 0.0790 | -3.24 | down | 0.0063 | -4.23 | down | 0.4090 | -1.67 | down | chorismate synthase\ Context:(NC_002946)+[1289738-1290838]\ Notes:catalyzes the formation of chorismate from 5-O-(1-carboxyvinyl)-3-phosphoshikimate in aromatic amino acid biosynthesis                                                                                                                                               |
| NGO1332 | 0.7306 | -1.18 | down | 0.5685 | -1.30 | down | 0.8478 | -1.06 | down | hypothetical protein\ Context:(NC_002946)+[1290929-1291354]\ Notes:Best Blastp Hit: pir   C81055 hypothetical protein NMB1681 [imported] - Neisseria meningitidis (group B strain MD58) >gi 7226934 gb AAF42029.1  (AE002518) hypothetical protein [Neisseria meningitidis MC58]                                                       |
| NGO1333 | 0.7617 | 1.18  | up   | 0.7371 | -1.41 | down | 0.4472 | 1.63  | up   | DNA topoisomerase IV subunit B\ Context:(NC_002946)-[1291428-1293413]\ Notes:decatenates newly replicated chromosomal DNA and relaxes positive and negative DNA supercoiling                                                                                                                                                           |
| NGO1334 | 0.6169 | -1.40 | down | 0.1514 | -2.56 | down | 0.1633 | -2.27 | down | dinucleoside polyphosphate hydrolase\ Context:(NC_002946)-[1293480-1294088]\ Notes:Hydrolyzes diadenosine polyphosphate                                                                                                                                                                                                                |
| NGO1335 | 0.3658 | 1.61  | up   | 0.9076 | 1.05  | up   | 0.6615 | 1.14  | up   | seryl-tRNA synthetase\ Context:(NC_002946)+[1294170-1295465]\ Notes:catalyzes a two-step reaction; first charging a serine molecule by linking its carboxyl group to the alpha-phosphate of ATP; followed by transfer of the aminoacyl-adenylate to its tRNA                                                                           |
| NGO1336 | 0.9003 | 1.06  | up   | 0.6706 | 1.20  | up   | 0.8827 | 1.04  | up   | D-lactate dehydrogenase\ Context:(NC_002946)-[1295538-1296536]\ Notes:Catalyzes the reduction of sulfopyruvate to (R)-sulfolactate much more efficiently than the reverse reaction. Also catalyzes the reduction of oxaloacetate; alpha-ketoglutarate; and to a much lower extent; KHTCA; but not pyruvate. Involved in the biosynthes |
| NGO1337 | 0.5758 | 1.51  | up   | 0.1576 | -2.03 | down | 0.6445 | -1.33 | down | peptide chain release factor 1\ Context:(NC_002946)-[1296661-1297737]\ Notes:recognizes the termination signals UAG and UAA during protein translation a specificity which is dependent on amino acid residues residing in loops of the L-shaped tRNA-like molecule of RF1; this protein is similar to release factor 2                |
| NGO1338 | 0.1834 | 4.71  | up   | 0.8709 | 1.11  | up   | 0.6586 | 1.21  | up   | hypothetical protein\ Context:(NC_002946)-[1297827-1298597]\ Notes:Best Blastp Hit: gb AAF42035.1  (AE002519) conserved hypothetical protein [Neisseria meningitidis MC58] COG0084 Predicted hydrolases of PHP superfamily                                                                                                             |

|         |        |       |      |        |       |      |        |       |      |                                                                                                                                                                                                                                                                                                                                                                                                                                                                                                                                                                       |
|---------|--------|-------|------|--------|-------|------|--------|-------|------|-----------------------------------------------------------------------------------------------------------------------------------------------------------------------------------------------------------------------------------------------------------------------------------------------------------------------------------------------------------------------------------------------------------------------------------------------------------------------------------------------------------------------------------------------------------------------|
| NGO1339 | 0.1808 | 2.69  | up   | 0.3880 | -1.62 | down | 0.1372 | 1.66  | up   | AnsA\ Context:(NC_002946)-[1298600-1299592]\<br>Notes:Best Blastp Hit: emb CAB85167.1  (AL162757) L-<br>asparaginase [Neisseria meningitidis] COG0252 L-<br>asparaginase; putative L-asparaginase                                                                                                                                                                                                                                                                                                                                                                     |
| NGO1340 | 0.3793 | -1.62 | down | 0.2837 | -1.72 | down | 0.7770 | -1.10 | down | hypothetical protein\ Context:(NC_002946)-[1299659-<br>1300342]\ Notes:Best Blastp Hit: pir   B81823 DedA-family<br>integral membrane protein NMA1948 [imported] -<br>Neisseria meningitidis (group A strain Z2491)<br>>gi 7380580  emb CAB85168.1  (AL162757) DedA-family<br>integral membrane protein [Neisseria meningitidis]<br>COG0586 Uncharacterized membrane-associated                                                                                                                                                                                       |
| NGO1341 | 0.2564 | -1.83 | down | 0.2137 | -2.16 | down | 0.2196 | -1.59 | down | MrsA\ Context:(NC_002946)-[1300531-1301868]\<br>Notes:Best Blastp Hit: pir   C81054<br>phosphoglucomutase/phosphomannomutase family<br>protein NMB1690 [imported] - Neisseria meningitidis<br>(group B strain MD58) >gi 7226944  gb AAF42038.1 <br>(AE002519) phosphoglucomutase/phosphomannomutase<br>family protein [Neisseria meningitidis MC58] COG1109<br>Phosphomannomutase; putative phosphoglucomutase<br>protein                                                                                                                                             |
| NGO1342 | 0.1555 | -2.37 | down | 0.4502 | -1.40 | down | 0.0461 | -4.02 | down | DHPS\ Context:(NC_002946)-[1301995-1302849]\<br>Notes:Best Blastp Hit: sp Q51161 DHPS_NEIME<br>dihydropteroate synthase (DHPS) (dihydropteroate<br>pyrophosphorylase) >G 95427  pir   S25614<br>dihydropteroate synthase (EC 2.5.1.15) - Neisseria<br>meningitidis (strain 952/68) >gi 2120887  pir   S65839<br>dihydropteroate synthase (EC 2.5.1.15) - Neisseria<br>meningitidis (strain 952/68) >gi 45036  emb CAA48206.1 <br>(X68069) dihydropteroate synthase [Neisseria meningitidis]<br>COG0294 Dihydropteroate synthase; putative<br>dihydropteroate synthase |
| NGO1343 | 0.8504 | -1.19 | down | 0.8193 | -1.10 | down | 0.3060 | -1.35 | down | hypothetical protein\ Context:(NC_002946)-[1302989-<br>1303882]\ Notes:Best Blastp Hit: gb AAF42040.1 <br>(AE002519) chorismate mutase-related protein [Neisseria<br>meningitidis MC58] COG0722 DAHP synthase/3-Deoxy-D-<br>manno-octulosonic                                                                                                                                                                                                                                                                                                                         |

|         |        |       |      |        |        |      |        |       |      |                                                                                                                                                                                                                                                                                                                                                 |
|---------|--------|-------|------|--------|--------|------|--------|-------|------|-------------------------------------------------------------------------------------------------------------------------------------------------------------------------------------------------------------------------------------------------------------------------------------------------------------------------------------------------|
| NGO1344 | 0.1998 | -5.90 | down | 0.1302 | -15.37 | down | 0.8507 | 1.24  | up   | hypothetical protein\ Context:(NC_002946)+[1303973-1306075]\ Notes:Best Blastp Hit: pir     G81051 hypothetical protein NMB1693 [imported] - Neisseria meningitidis (group B strain MD58) >gi 7226948 gb AAF42041.1  (AE002520) hypothetical protein [Neisseria meningitidis MC58]                                                              |
| NGO1345 | 0.7202 | -1.17 | down | 0.5124 | -1.28  | down | 0.7843 | -1.08 | down | hypothetical protein\ Context:(NC_002946)-[1306139-1307617]\ Notes:Best Blastp Hit: pir     H81051 conserved hypothetical protein NMB1694 [imported] - Neisseria meningitidis (group B strain MD58) >gi 7226949 gb AAF42042.1  (AE002520) conserved hypothetical protein [Neisseria meningitidis MC58] COG0043 Uncharacterized ACR; YigC family |
| NGO1346 | 0.2534 | -1.76 | down | 0.6218 | -1.23  | down | 0.9696 | -1.01 | down | hypothetical protein\ Context:(NC_002946)-[1307637-1308152]\ Notes:Best Blastp Hit: pir     G81823 hypothetical protein NMA1953 [imported] - Neisseria meningitidis (group A strain Z2491) >gi 7380585 emb CAB85173.1  (AL162757) hypothetical protein [Neisseria meningitidis]                                                                 |
| NGO1347 | 0.4593 | 1.40  | up   | 0.9084 | -1.05  | down | 0.7623 | 1.10  | up   | hypothetical protein\ Context:(NC_002946)-[1308159-1308500]\ Notes:Best Blastp Hit: pir     H81823 probable integral membrane protein NMA1954 [imported] - Neisseria meningitidis (group A strain Z2491) >gi 7380586 emb CAB85174.1  (AL162757) putative integral membrane protein [Neisseria meningitidis]                                     |
| NGO1348 | 0.0179 | -8.48 | down | 0.1396 | -7.43  | down | 0.6336 | -1.39 | down | hypothetical protein\ Context:(NC_002946)-[1308544-1308711]\ Notes:Best Blastp Hit: pir     B81171 hypothetical protein NMB0676 [imported] - Neisseria meningitidis (group B strain MD58) >gi 7225903 gb AAF41094.1  (AE002422) hypothetical protein [Neisseria meningitidis MC58]                                                              |
| NGO1349 | 0.2057 | 2.75  | up   | 0.4574 | -1.85  | down | 0.1081 | -2.14 | down | hypothetical protein\ Context:(NC_002946)-[1308789-1309538]\ Notes:Best Blastp Hit: emb CAB85175.1  (AL162757) hypothetical protein [Neisseria meningitidis]                                                                                                                                                                                    |
| NGO1350 | 0.0448 | -5.30 | down | 0.0003 | -13.15 | down | 0.5326 | -1.26 | down | hypothetical protein\ Context:(NC_002946)+[1309781-1310347]\ Notes:Best Blastp Hit: pir     G81052 hypothetical protein NMB1701 [imported] - Neisseria meningitidis (group B strain MD58) >gi 7226956 gb AAF42049.1  (AE002520) hypothetical protein [Neisseria meningitidis MC58]                                                              |

|         |        |       |      |        |        |      |        |       |      |                                                                                                                                                                                                                                                                                                                                                                                                                                            |
|---------|--------|-------|------|--------|--------|------|--------|-------|------|--------------------------------------------------------------------------------------------------------------------------------------------------------------------------------------------------------------------------------------------------------------------------------------------------------------------------------------------------------------------------------------------------------------------------------------------|
| NGO1352 | 0.0258 | -4.21 | down | 0.0146 | -6.97  | down | 0.0624 | -2.06 | down | putative 3-oxoacyl-(acyl-carrier-protein) synthase\<br>Context:(NC_002946)+[1311101-1312243]\ Notes:Best<br>Blastp Hit: pir    A81053 3-oxoacyl-(acyl-carrier-protein)<br>synthase II NMB1703 [imported] - Neisseria meningitidis<br>(group B strain MD58) >gi  7226958 gb AAF42051.1 <br>(AE002520) 3-oxoacyl-(acyl-carrier-protein) synthase II<br>[Neisseria meningitidis MC58] COG0304 3-oxoacyl-(acyl-<br>carrier-protein) synthase I |
| NGO1353 | 0.1825 | -2.26 | down | 0.3101 | -1.70  | down | 0.7603 | 1.13  | up   | hypothetical protein\<br>Context:(NC_002946)+[1312530-<br>1313294]\ Notes:Best Blastp Hit: emb  CAB85178.1 <br>(AL162757) beta-1;4-glucosyltransferase [Neisseria<br>meningitidis] COG0463 Glycosyltransferases involved in cell                                                                                                                                                                                                           |
| NGO1354 | 0.8848 | -1.08 | down | 0.4820 | -1.24  | down | 0.3149 | -1.37 | down | RfaK\<br>Context:(NC_002946)+[1313295-1314359]\<br>Notes:Best Blastp Hit: gb AAF42053.1  (AE002520) alpha-<br>1;2-N-acetylglucosamine transferase [Neisseria meningitidis<br>MC58] COG0438 Glycosyltransferases I; putative alpha-1;2-<br>N-acetylglucosamine transferase                                                                                                                                                                  |
| NGO1355 | 0.0341 | -4.64 | down | 0.0007 | -21.61 | down | 0.6420 | -1.17 | down | putative sodium dependent ion transport protein\<br>Context:(NC_002946)+[1314593-1315930]\ Notes:Best<br>Blastp Hit: pir    F81050 sodium- and chloride-dependent<br>transporter NMB1707 [imported] - Neisseria meningitidis<br>(group B strain MD58) >gi  7226963 gb AAF42055.1 <br>(AE002521) sodium- and chloride-dependent transporter<br>[Neisseria meningitidis MC58] COG0733 Sodium-dependent<br>transporters (SNF family)          |
| NGO1357 | 0.6841 | -1.26 | down | 0.7376 | 1.33   | up   | 0.6473 | 1.15  | up   | thymidylate synthase\<br>Context:(NC_002946)-[1317126-<br>1317920]\ Notes:ThyA; catalyzes formation of dTMP and<br>7;8-dihydrofolate from 5;10-methylenetetrahydrofolate<br>and dUMP; involved in deoxyribonucleotide biosynthesis;<br>there are 2 copies in some Bacilli; one of which appears to<br>be phage-derived                                                                                                                     |
| NGO1358 | 0.3086 | -1.82 | down | 0.1956 | -1.77  | down | 0.0783 | -1.76 | down | glutamate dehydrogenase\<br>Context:(NC_002946)+[1318344-<br>1319678]\ Notes:converts 2-oxoglutarate to glutamate; in<br>Escherichia coli this enzyme plays a role in glutamate<br>synthesis when the cell is under energy restriction; uses<br>NADPH; forms a homohexamer                                                                                                                                                                 |

|         |        |        |      |        |        |      |        |        |      |                                                                                                                                                                                                                                                                                                               |
|---------|--------|--------|------|--------|--------|------|--------|--------|------|---------------------------------------------------------------------------------------------------------------------------------------------------------------------------------------------------------------------------------------------------------------------------------------------------------------|
| NGO1359 | 0.1725 | -4.93  | down | 0.0250 | -5.50  | down | 0.2378 | -2.84  | down | hypothetical protein\ Context:(NC_002946)-[1319675-1319929]\ Notes:Best Blastp Hit: gb AAF41523.1  (AE002462) hypothetical protein [Neisseria meningitidis MC58] >gi 7226410 gb AAF41558.1  (AE002465) hypothetical protein [Neisseria meningitidis MC58]                                                     |
| NGO1360 | 0.0020 | -12.50 | down | 0.0017 | -13.43 | down | 0.0665 | -3.67  | down | GntR family transcriptional regulator\ Context:(NC_002946)-[1319917-1320696]\ Notes:Best Blastp Hit: emb CAB85185.1  (AL162757) GntR-family transcriptional regulator [Neisseria meningitidis] COG2186 Transcriptional regulators; FadR family                                                                |
| NGO1361 | 0.0001 | -46.05 | down | 0.0048 | -36.06 | down | 0.0010 | -29.77 | down | hypothetical protein\ Context:(NC_002946)+[1320974-1321261]\ Notes:Best Blastp Hit: gb AAF42059.1  (AE002521) L-lactate permease-related protein [Neisseria meningitidis MC58] COG1620 L-lactate permease                                                                                                     |
| NGO1362 | 0.0001 | -19.33 | down | 0.0316 | -14.34 | down | 0.2267 | -4.30  | down | hypothetical protein\ Context:(NC_002946)+[1321289-1321438]\ Notes:Best Blastp Hit: emb CAB85187.1  (AL162757) hypothetical protein [Neisseria meningitidis]                                                                                                                                                  |
| NGO1363 | 0.3134 | 1.66   | up   | 0.4198 | 1.55   | up   | 0.0440 | 3.33   | up   | hypothetical protein\ Context:(NC_002946)-[1321639-1323042]\ Notes:Best Blastp Hit: gb AAF42061.1  (AE002521) multidrug efflux pump channel protein [Neisseria meningitidis MC58]                                                                                                                             |
| NGO1364 | 0.4277 | 1.52   | up   | 0.4878 | 1.46   | up   | 0.3910 | -1.31  | down | antibiotic resistance efflux pump component\ Context:(NC_002946)-[1323095-1326298]\ Notes:Best Blastp Hit: gb AAC45560.1  (U60099) RND protein [Neisseria gonorrhoeae] COG0841 Cation efflux system protein                                                                                                   |
| NGO1365 | 0.1761 | 2.32   | up   | 0.1047 | -1.73  | down | 0.9954 | 1.00   | up   | antibiotic resistance efflux pump component\ Context:(NC_002946)-[1326310-1327548]\ Notes:Best Blastp Hit: sp P43505 MTRC_NEIGO membrane fusion protein MtrC precursor >gi 550460 gb AAA80193.1  (U14993) membrane fusion protein [Neisseria gonorrhoeae] COG0845 Membrane permeases; predicted cation efflux |



|         |        |        |      |        |        |      |        |        |      |                                                                                                                                                                                                                                                                                                                                                                                                                                                     |
|---------|--------|--------|------|--------|--------|------|--------|--------|------|-----------------------------------------------------------------------------------------------------------------------------------------------------------------------------------------------------------------------------------------------------------------------------------------------------------------------------------------------------------------------------------------------------------------------------------------------------|
| NGO1366 | 0.5148 | -1.47  | down | 0.0977 | -4.85  | down | 0.7110 | -1.17  | down | mtrCDE transcriptional regulator; repressor\<br>Context:(NC_002946)+[1327798-1328430]\ Notes:Best Blastp Hit: sp P39897 MTRR_NEIGO regulatory protein MtrR >gi 541020 pir  S40250 MtrR protein - Neisseria gonorrhoeae >gi 7449616 pir  S42419 probable transcription repressor mtrR - Neisseria gonorrhoeae (strain FA19) >gi 438189 emb CAA81047.1  (Z25797) MtrR protein [Neisseria gonorrhoeae] COG1309 Transcriptional regulators; AcrR family |
| NGO1367 | 0.6062 | 1.67   | up   | 0.4606 | -2.58  | down | 0.4246 | -2.17  | down | hypothetical protein\<br>Context:(NC_002946)-[1328523-1328780]\ Notes:Best Blastp Hit: emb CAB85192.1  (AL162757) hypothetical protein [Neisseria meningitidis]                                                                                                                                                                                                                                                                                     |
| NGO1368 | 0.0048 | -6.18  | down | 0.8017 | -1.11  | down | 0.2440 | -2.68  | down | antibiotic resistance efflux pump component\<br>Context:(NC_002946)+[1329067-1330635]\ Notes:Best Blastp Hit: gb AAD51362.2 AF176820_1 (AF176820) putative efflux pump component MtrF [Neisseria gonorrhoeae]                                                                                                                                                                                                                                       |
| NGO1369 | 0.4126 | 2.89   | up   | 0.0552 | -9.92  | down | 0.8063 | 1.21   | up   | putative exodeoxyribonuclease V\<br>Context:(NC_002946)-[1330703-1333909]\ Notes:Best Blastp Hit: pir  D81826 exodeoxyribonuclease V (EC 3.1.1.15) NMA1974 [imported] - Neisseria meningitidis (group A strain Z2491) >gi 7380606 emb CAB85194.1  (AL162757) exodeoxyribonuclease V [Neisseria meningitidis] COG1330 Exonuclease V gamma subunit; RecC                                                                                              |
| NGO1370 | 0.0083 | -11.15 | down | 0.0007 | -11.75 | down | 0.0198 | -13.83 | down | hypothetical protein\<br>Context:(NC_002946)-[1334010-1335419]\ Notes:Best Blastp Hit: pir  E81826 probable integral membrane protein NMA1975 [imported] - Neisseria meningitidis (group A strain Z2491) >gi 7380607 emb CAB85195.1  (AL162757) putative integral membrane protein [Neisseria meningitidis]                                                                                                                                         |
| NGO1371 | 0.0325 | -3.01  | down | 0.0823 | -3.00  | down | 0.2398 | -1.91  | down | CcoP\<br>Context:(NC_002946)-[1335763-1337082]\ Notes:Best Blastp Hit: gb AAF42068.1  (AE002522) cytochrome c oxidase; subunit III [Neisseria meningitidis MC58] COG2010 Cytochrome c; mono- and diheme variants; putative cytochrome c oxidase subunit                                                                                                                                                                                             |

|         |        |       |      |        |       |      |        |       |      |                                                                                                                                                                                                                                                                                                                                                                                                                                                                                                          |
|---------|--------|-------|------|--------|-------|------|--------|-------|------|----------------------------------------------------------------------------------------------------------------------------------------------------------------------------------------------------------------------------------------------------------------------------------------------------------------------------------------------------------------------------------------------------------------------------------------------------------------------------------------------------------|
| NGO1372 | 0.8827 | -1.09 | down | 0.3466 | -1.46 | down | 0.4849 | -1.34 | down | hypothetical protein\ Context:(NC_002946)-[1337106-1337276]\ Notes:Best Blastp Hit: emb CAB85198.1  (AL162757) hypothetical protein [Neisseria meningitidis]                                                                                                                                                                                                                                                                                                                                             |
| NGO1373 | 0.4495 | -1.44 | down | 0.1731 | -1.79 | down | 0.1911 | -1.58 | down | CcoO\ Context:(NC_002946)-[1337281-1337892]\ Notes:Best Blastp Hit: pir   D81050 cytochrome c oxidase; chain II NMB1724 [imported] - Neisseria meningitidis (group B strain MD58) >gi 7226978 gb AAF42069.1  (AE002522) cytochrome c oxidase; subunit II [Neisseria meningitidis MC58]; putative cytochrome c oxidase subunit                                                                                                                                                                            |
| NGO1374 | 0.9533 | 1.03  | up   | 0.3657 | -1.43 | down | 0.3315 | -1.39 | down | CcoN\ Context:(NC_002946)-[1337919-1339364]\ Notes:Best Blastp Hit: pir   E81050 cytochrome-c oxidase (EC 1.9.3.1) fixN chain NMB1725 [similarity] - Neisseria meningitidis (group B strain MD58; group A strain Z2491) >gi 7226979 gb AAF42070.1  (AE002522) cytochrome c oxidase; subunit I [Neisseria meningitidis MC58] >gi 7380611 emb CAB85200.1  (AL162757) cytochrome c oxidase subunit [Neisseria meningitidis] COG0843 Cytochrome c oxidase; heme b and; putative cytochrome c oxidase subunit |
| NGO1375 | 0.1588 | 2.51  | up   | 0.0804 | 2.56  | up   | 0.0091 | 4.40  | up   | hypothetical protein\ Context:(NC_002946)+[1339678-1341426]\ Notes:Best Blastp Hit: pir   E81048 conserved hypothetical protein NMB1726 [imported] - Neisseria meningitidis (group B strain MD58) >gi 7226981 gb AAF42071.1  (AE002523) conserved hypothetical protein [Neisseria meningitidis MC58] COG0265 Trypsin-like serine proteases; typically                                                                                                                                                    |
| NGO1376 | 0.4011 | 1.74  | up   | 0.6539 | 1.18  | up   | 0.2707 | 1.68  | up   | hypothetical protein\ Context:(NC_002946)+[1341452-1341919]\ Notes:Best Blastp Hit: pir   C81827 hypothetical protein NMA1982 [imported] - Neisseria meningitidis (group A strain Z2491) >gi 7380613 emb CAB85202.1  (AL162757) hypothetical protein [Neisseria meningitidis]                                                                                                                                                                                                                            |
| NGO1377 | 0.0068 | 8.28  | up   | 0.0303 | 3.54  | up   | 0.0068 | 4.26  | up   | hypothetical protein\ Context:(NC_002946)-[1342420-1342854]\ Notes:Best Blastp Hit: sp O06434 EXBD_NEIGO biopolymer transport ExbD protein >gi 2098623 gb AAC45288.1  (U79563) ExbD [Neisseria gonorrhoeae] COG0848 biopolymer transport protein ExbD                                                                                                                                                                                                                                                    |

|         |        |       |      |        |       |      |        |       |      |                                                                                                                                                                                                                                                                                                                                     |
|---------|--------|-------|------|--------|-------|------|--------|-------|------|-------------------------------------------------------------------------------------------------------------------------------------------------------------------------------------------------------------------------------------------------------------------------------------------------------------------------------------|
| NGO1378 | 0.0021 | 8.71  | up   | 0.0315 | 3.54  | up   | 0.0096 | 3.68  | up   | ExbB\ Context:(NC_002946)-[1342857-1343567]\<br>Notes:Best Blastp Hit: sp O06433 EXBB_NEIGO biopolymer transport ExbB protein >gi 2098622 gb AAC45287.1  (U79563) ExbB [Neisseria gonorrhoeae] COG0811 biopolymer transport proteins                                                                                                |
| NGO1379 | 0.0415 | 3.48  | up   | 0.0755 | 2.84  | up   | 0.0236 | 3.09  | up   | TonB\ Context:(NC_002946)-[1343585-1344436]\<br>Notes:Best Blastp Hit: sp O06432 TONB_NEIGO TonB protein >gi 2098621 gb AAC45286.1  (U79563) TonB [Neisseria gonorrhoeae]                                                                                                                                                           |
| NGO1380 | 0.8195 | -1.12 | down | 0.5648 | -1.46 | down | 0.3080 | -1.66 | down | hypothetical protein\ Context:(NC_002946)+[1344692-1345330]\ Notes:Best Blastp Hit: pir   B81049 conserved hypothetical protein NMB1731 [imported] - Neisseria meningitidis (group B strain MD58) >gi 7226986 gb AAF42076.1  (AE002523) conserved hypothetical protein [Neisseria meningitidis MC58] COG1994 Zn-dependent proteases |
| NGO1381 | 0.6198 | -1.27 | down | 0.3535 | -1.57 | down | 0.4168 | -1.26 | down | glutaredoxin 2\ Context:(NC_002946)-[1345402-1346043]\<br>Notes:cofactor involved in the reduction of disulfides                                                                                                                                                                                                                    |
| NGO1382 | 0.5106 | 1.54  | up   | 0.5357 | 1.49  | up   | 0.2518 | 1.94  | up   | putative GTP pyrophosphokinase\ Context:(NC_002946)+[1346186-1348399]\ Notes:Best Blastp Hit: pir   F81049 GTP pyrophosphokinase NMB1735 [imported] - Neisseria meningitidis (group B strain MD58) >gi 7226990 gb AAF42080.1  (AE002523) GTP pyrophosphokinase [Neisseria meningitidis MC58] COG0317 Guanosine                      |
| NGO1383 | 0.5906 | 1.33  | up   | 0.4987 | 1.27  | up   | 0.8423 | -1.08 | down | hypothetical protein\ Context:(NC_002946)-[1348463-1348840]\ Notes:Best Blastp Hit: pir   E81783 hypothetical protein NMA2118 [imported] - Neisseria meningitidis (group A strain Z2491) >gi 7380741 emb CAB85332.1  (AL162758) hypothetical protein [Neisseria meningitidis]                                                       |
| NGO1384 | 0.0219 | -4.45 | down | 0.3223 | -1.57 | down | 0.0297 | -2.78 | down | hypothetical protein\ Context:(NC_002946)-[1348909-1349394]\ Notes:Best Blastp Hit: pir   D81783 hypothetical protein NMA2117 [imported] - Neisseria meningitidis (group A strain Z2491) >gi 7380740 emb CAB85331.1  (AL162758) hypothetical protein [Neisseria meningitidis]                                                       |
| NGO1385 | 0.1448 | 2.15  | up   | 0.2064 | 2.46  | up   | 0.6465 | -1.20 | down | hypothetical protein\ Context:(NC_002946)-[1349345-1349974]\ Notes:Best Blastp Hit: possibly an alternative C terminus for MafB                                                                                                                                                                                                     |

|         |        |       |      |        |       |      |        |       |      |                                                                                                                                                                                                                                                                                                                                                                                                                                      |
|---------|--------|-------|------|--------|-------|------|--------|-------|------|--------------------------------------------------------------------------------------------------------------------------------------------------------------------------------------------------------------------------------------------------------------------------------------------------------------------------------------------------------------------------------------------------------------------------------------|
| NGO1386 | 0.5901 | 1.27  | up   | 0.2591 | 1.52  | up   | 0.5293 | 1.24  | up   | hypothetical protein\ Context:(NC_002946)-[1350801-1351505]\ Notes:Best Blastp Hit: possibly an alternative C terminus for MafB                                                                                                                                                                                                                                                                                                      |
| NGO1387 | 0.6080 | 1.33  | up   | 0.3033 | 1.42  | up   | 0.6676 | -1.15 | down | hypothetical protein\ Context:(NC_002946)-[1351641-1352183]\ Notes:Best Blastp Hit: sp P45941 YQCF_BACSU hypothetical 21.5 KD protein in CWLA-CISA intergenic region >gi 7475297 pir E69949 hypothetical protein yqcF - Bacillus subtilis >gi 1217878 dbj BAA06963.1  (D32216) ORF95 [Bacillus subtilis] >gi 1303771 dbj BAA12427.1  (D84432) YqcF [Bacillus subtilis] >gi 2635032 emb CAB14528.1  (Z99117) yqcF [Bacillus subtilis] |
| NGO1388 | 0.3121 | 1.72  | up   | 0.3973 | 1.47  | up   | 0.9278 | 1.04  | up   | hypothetical protein\ Context:(NC_002946)-[1352310-1352537]\ Notes:Best Blastp Hit: pir S24525 Ig heavy chain V region - mouse >gi 51255 emb CAA47230.1  (X66668) immunoglobulin heavy chain [Mus musculus]                                                                                                                                                                                                                          |
| NGO1389 | 0.1155 | 5.05  | up   | 0.0541 | 3.46  | up   | 0.7521 | -1.11 | down | hypothetical protein\ Context:(NC_002946)-[1352596-1352919]\ Notes:                                                                                                                                                                                                                                                                                                                                                                  |
| NGO1390 | 0.0915 | -2.79 | down | 0.0653 | -4.58 | down | 0.0446 | -4.14 | down | hypothetical protein\ Context:(NC_002946)-[1352909-1353262]\ Notes:                                                                                                                                                                                                                                                                                                                                                                  |
| NGO1391 | 0.6278 | 1.29  | up   | 0.6114 | 1.21  | up   | 0.8210 | -1.06 | down | hypothetical protein\ Context:(NC_002946)-[1353559-1354107]\ Notes:Best Blastp Hit: emb CAC01359.1  (AL390975) hypothetical protein SCP8.21 [Streptomyces coelicolor A3(2)]                                                                                                                                                                                                                                                          |
| NGO1392 | 0.7596 | 1.14  | up   | 0.9733 | 1.02  | up   | 0.6578 | -1.23 | down | MafB3\ Context:(NC_002946)-[1354097-1355914]\ Notes:Best Blastp Hit: pir H81782 adhesin MafB2 NMA2113 [imported] - Neisseria meningitidis (group A strain Z2491) >gi 7380736 emb CAB85327.1  (AL162758) adhesin MafB2 [Neisseria meningitidis]; putative MafB-like protein                                                                                                                                                           |
| NGO1395 | 0.4404 | -1.93 | down | 0.1417 | -8.10 | down | 0.1953 | -4.24 | down | hypothetical protein\ Context:(NC_002946)+[1357719-1358300]\ Notes:Best Blastp Hit: emb CAB84330.1  (AL162755) putative periplasmic protein [Neisseria meningitidis] COG1101 ATPase components of various transport                                                                                                                                                                                                                  |

|         |        |       |      |        |        |      |        |       |      |                                                                                                                                                                                                                                                                                                                                                                                                                                                                                              |
|---------|--------|-------|------|--------|--------|------|--------|-------|------|----------------------------------------------------------------------------------------------------------------------------------------------------------------------------------------------------------------------------------------------------------------------------------------------------------------------------------------------------------------------------------------------------------------------------------------------------------------------------------------------|
| NGO1396 | 0.5628 | -1.38 | down | 0.3540 | -1.98  | down | 0.0740 | -2.61 | down | putative electron transfer flavoprotein-ubiquinone oxidoreductase\ Context:(NC_002946)+[1358282-1360090]\ Notes:Best Blastp Hit: emb CAB84049.1  (AL162754) putative electron transfer flavoprotein-ubiquinone oxidoreductase [Neisseria meningitidis] COG0644 Dehydrogenases (flavoproteins)                                                                                                                                                                                                |
| NGO1397 | 0.0298 | -3.20 | down | 0.1049 | -2.58  | down | 0.5321 | -1.45 | down | NosL\ Context:(NC_002946)-[1360224-1360718]\ Notes:Best Blastp Hit: pir   G81183 protein disulfide isomerase NosL; probable NMB0580 [imported] - Neisseria meningitidis (group B strain MD58; group A strain Z2491) >gi 7225808 gb AAF41008.1  (AE002413) protein disulfide isomerase NosL; putative [Neisseria meningitidis MC58] >gi 7379486 emb CAB84048.1  (AL162754) putative lipoprotein [Neisseria meningitidis]; putative dissimilatory nitrous oxide reduction protein; lipoprotein |
| NGO1398 | 0.0052 | -9.95 | down | 0.0004 | -20.07 | down | 0.9536 | -1.07 | down | hypothetical protein\ Context:(NC_002946)-[1360715-1361545]\ Notes:Best Blastp Hit: pir   T44663 nosY protein [imported] - Bradyrhizobium japonicum >gi 3850617 emb CAA05522.1  (AJ002531) nosY [Bradyrhizobium japonicum] COG1277 Predicted membrane protein                                                                                                                                                                                                                                |
| NGO1399 | 0.1627 | 2.74  | up   | 0.1427 | -5.24  | down | 0.3190 | -2.38 | down | putative ABC transporter; ATP-binding protein\ Context:(NC_002946)-[1361542-1362468]\ Notes:Best Blastp Hit: pir   D81920 probable ABC-transporter ATP-binding protein NMA0763 [imported] - Neisseria meningitidis (group A strain Z2491) >gi 7379484 emb CAB84046.1  (AL162754) putative ABC-transporter ATP-binding protein [Neisseria meningitidis] COG1131 ABC-type multidrug transport system; ATPase                                                                                   |
| NGO1403 | 0.3272 | -1.83 | down | 0.0180 | -6.43  | down | 0.0790 | -2.18 | down | glutamyl-tRNA reductase\ Context:(NC_002946)-[1368673-1369920]\ Notes:catalyzes the formation of glutamate-1-semialdehyde from glutamyl-tRNA(Glu) and NADPH; the second step of the pathway is catalyzed by glutamate-1-semialdehyde aminomutase which results in the formation of 5-aminolevulinic acid; functions in porphyrin (tetrapyrroles) biosynthesis; the crystal structure showed a C-terminal dimerization domain that appears to be absent in Chlamydial proteins                |

|         |        |       |      |        |       |      |        |       |      |                                                                                                                                                                                                                                                                                                                                                                                                   |
|---------|--------|-------|------|--------|-------|------|--------|-------|------|---------------------------------------------------------------------------------------------------------------------------------------------------------------------------------------------------------------------------------------------------------------------------------------------------------------------------------------------------------------------------------------------------|
| NGO1404 | 0.5252 | -1.42 | down | 0.4152 | -1.57 | down | 0.2002 | -1.48 | down | glycine cleavage system protein H\ Context:(NC_002946)-[1370073-1370459]\ Notes:part of multienzyme complex composed of H; L; P; and T proteins which catalyzes oxidation of glycine to yield carbon dioxide; ammonia; 5;10-CH2-H4folate and a reduced pyridine nucleotide; protein H is involved in transfer of methylamine group from the P to T protein; covalently bound to a lipoyl cofactor |
| NGO1405 | 0.8768 | 1.13  | up   | 0.2009 | -2.38 | down | 0.2117 | -1.83 | down | hypothetical protein\ Context:(NC_002946)-[1370511-1371050]\ Notes:                                                                                                                                                                                                                                                                                                                               |
| NGO1406 | 0.1371 | -2.61 | down | 0.0308 | -8.61 | down | 0.0963 | -3.41 | down | glycine cleavage system aminomethyltransferase T\ Context:(NC_002946)-[1371197-1372297]\ Notes:catalyzes the transfer of a methylene carbon from the methylamine-loaded GcvH protein to tetrahydrofolate; causing the release of ammonia and the generation of reduced GcvH protein                                                                                                               |
| NGO1407 | 0.4293 | 1.50  | up   | 0.1634 | 1.87  | up   | 0.8704 | 1.05  | up   | AsnC family transcriptional regulator\ Context:(NC_002946)+[1372809-1373291]\ Notes:Best Blastp Hit: gb AAF41001.1  (AE002413) transcriptional regulator; AsnC family [Neisseria meningitidis MC58] COG1522 Transcriptional regulators; Lrp family                                                                                                                                                |
| NGO1408 | 0.4907 | 1.49  | up   | 0.5265 | 1.27  | up   | 0.6094 | 1.18  | up   | hypothetical protein\ Context:(NC_002946)+[1373338-1373943]\ Notes:Best Blastp Hit: pir D81919 hypothetical protein NMA0755 [imported] - Neisseria meningitidis (group A strain Z2491) >gi 7379476 emb CAB84038.1  (AL162754) hypothetical protein NMA0755 [Neisseria meningitidis]                                                                                                               |
| NGO1410 | 0.0847 | -3.00 | down | 0.7908 | -1.27 | down | 0.9882 | 1.01  | up   | hypothetical protein\ Context:(NC_002946)+[1373940-1374299]\ Notes:Best Blastp Hit: pir C81919 probable membrane protein NMA0754 [imported] - Neisseria meningitidis (group A strain Z2491) >gi 7379475 emb CAB84037.1  (AL162754) putative membrane protein [Neisseria meningitidis]                                                                                                             |
| NGO1411 | 0.1645 | 2.37  | up   | 0.0279 | 3.16  | up   | 0.1293 | 2.46  | up   | hypothetical protein\ Context:(NC_002946)+[1374586-1376079]\ Notes:Best Blastp Hit: gb AAF40998.1  (AE002413) hypothetical protein [Neisseria meningitidis MC58]                                                                                                                                                                                                                                  |

|         |        |        |      |        |       |      |        |       |      |                                                                                                                                                                                                                                                                                                                                                                                                                                                                 |
|---------|--------|--------|------|--------|-------|------|--------|-------|------|-----------------------------------------------------------------------------------------------------------------------------------------------------------------------------------------------------------------------------------------------------------------------------------------------------------------------------------------------------------------------------------------------------------------------------------------------------------------|
| NGO1413 | 0.6655 | -1.25  | down | 0.0895 | -1.96 | down | 0.1468 | -1.77 | down | Na(+)-translocating NADH-quinone reductase subunit A\<br>Context:(NC_002946)+[1377044-1378387]\ Notes:uses the energy from reduction of ubiquinone-1 to ubiquinol to move Na(+) ions from the cytoplasm to the periplasm                                                                                                                                                                                                                                        |
| NGO1414 | 0.4317 | -1.54  | down | 0.6403 | -1.50 | down | 0.2691 | -1.55 | down | Na(+)-translocating NADH-quinone reductase subunit B\<br>Context:(NC_002946)+[1378390-1379622]\ Notes:uses the energy from reduction of ubiquinone-1 to ubiquinol to move Na(+) ions from the cytoplasm to the periplasm                                                                                                                                                                                                                                        |
| NGO1415 | 0.8794 | 1.08   | up   | 0.4329 | 1.34  | up   | 0.5678 | 1.16  | up   | Na(+)-translocating NADH-quinone reductase subunit C\<br>Context:(NC_002946)+[1379615-1380391]\ Notes:uses the energy from reduction of ubiquinone-1 to ubiquinol to move Na(+) ions from the cytoplasm to the periplasm                                                                                                                                                                                                                                        |
| NGO1416 | 0.8076 | 1.13   | up   | 0.7720 | 1.37  | up   | 0.5105 | 1.74  | up   | Na(+)-translocating NADH-quinone reductase subunit D\<br>Context:(NC_002946)+[1380391-1381017]\ Notes:Part of the NQR complex which catalyzes the reduction of ubiquinone-1 to ubiquinol by two successive reactions; coupled with the transport of Na(+) ions from the cytoplasm to the periplasm                                                                                                                                                              |
| NGO1417 | 0.8707 | -1.07  | down | 0.3474 | 3.76  | up   | 0.2128 | 2.58  | up   | Na(+)-translocating NADH-quinone reductase subunit E\<br>Context:(NC_002946)+[1381021-1381614]\ Notes:Part of the NQR complex which consists of NqrA; NqrB; NqrC; NqrD; NqrE and NqrF; NQR complex catalyzes the reduction of ubiquinone-1 to ubiquinol by two successive reactions; coupled with the transport of Na(+) ions from the cytoplasm to the periplasm; NqrE is probably involved in the second step; the conversion of ubisemiquinone to ubiquinol. |
| NGO1418 | 0.6069 | -1.33  | down | 0.9706 | -1.03 | down | 0.7228 | 1.29  | up   | Na(+)-translocating NADH-quinone reductase subunit F\<br>Context:(NC_002946)+[1381628-1382845]\ Notes:uses the energy from reduction of ubiquinone-1 to ubiquinol to move Na(+) ions from the cytoplasm to the periplasm                                                                                                                                                                                                                                        |
| NGO1419 | 0.0024 | -18.79 | down | 0.1894 | -8.10 | down | 0.7539 | 1.48  | up   | hypothetical protein\<br>Context:(NC_002946)+[1383027-1383194]\ Notes:                                                                                                                                                                                                                                                                                                                                                                                          |

|         |        |       |      |        |       |      |        |       |      |                                                                                                                                                                                                                                                                                                                                                                                                                                                           |
|---------|--------|-------|------|--------|-------|------|--------|-------|------|-----------------------------------------------------------------------------------------------------------------------------------------------------------------------------------------------------------------------------------------------------------------------------------------------------------------------------------------------------------------------------------------------------------------------------------------------------------|
| NGO1420 | 0.6219 | -1.29 | down | 0.3169 | -1.92 | down | 0.2677 | 1.75  | up   | hypothetical protein\ Context:(NC_002946)+[1383362-1384417]\ Notes:Best Blastp Hit: pir    F81184 thiamin biosynthesis lipoprotein ApbE NMB0563 [imported] - Neisseria meningitidis (group B strain MD58) >gi 7225790 gb AAF40991.1 (AE002412) thiamine biosynthesis lipoprotein ApbE [Neisseria meningitidis MC58] COG1477 Membrane-associated lipoprotein ApbE                                                                                          |
| NGO1421 | 0.3031 | 2.05  | up   | 0.2823 | 1.45  | up   | 0.3160 | -1.79 | down | hypothetical protein\ Context:(NC_002946)+[1384443-1384658]\ Notes:Best Blastp Hit: gb AAF40990.1 (AE002412) conserved hypothetical protein [Neisseria meningitidis MC58] >gi 7379466 emb CAB84028.1 (AL162754) putative periplasmic protein [Neisseria meningitidis]                                                                                                                                                                                     |
| NGO1422 | 0.0916 | 3.07  | up   | 0.0403 | 2.17  | up   | 0.2328 | 1.94  | up   | putative heat shock protein\ Context:(NC_002946)-[1384782-1385360]\ Notes:Best Blastp Hit: pir    D81184 probable heat shock protein grpE NMA0744 [imported] - Neisseria meningitidis (group B strain MD58; group A strain Z2491) >gi 7225788 gb AAF40989.1 (AE002412) grpE protein [Neisseria meningitidis MC58] >gi 7379465 emb CAB84027.1 (AL162754) probable heat shock protein [Neisseria meningitidis] COG0576 Molecular chaperone GrpE (heat shock |
| NGO1423 | 0.0331 | -3.36 | down | 0.0453 | -4.83 | down | 0.0766 | -2.20 | down | hypothetical protein\ Context:(NC_002946)+[1385543-1386361]\ Notes:Best Blastp Hit: possibly phase variable - 8A residue homopolymer repeat in the coding sequence (ON) COG1045 Serine acetyltransferase                                                                                                                                                                                                                                                  |
| NGO1424 | 0.9403 | 1.04  | up   | 0.7148 | 1.12  | up   | 0.3533 | 1.39  | up   | putative ubiquinone biosynthesis protein UbiB\ Context:(NC_002946)-[1386565-1388076]\ Notes:an Escherichia coli mutant results in accumulation of octaprenylphenol and no ubiquinone; functions in the formation of 2-octaprenyl-6-hydroxy-phenol from 2-octaprenylphenol in ubiquinone (coenzyme Q) biosynthesis; similar to eukaryotic proteins that exhibit kinase functions                                                                           |
| NGO1426 | 0.7209 | -1.21 | down | 0.5339 | -1.28 | down | 0.0174 | -3.13 | down | iron-sulfur cluster insertion protein ErpA\ Context:(NC_002946)-[1388728-1389066]\ Notes:essential respiratory protein A; may be involved in the transfer of iron-sulfur clusters; essential for growth using oxygen or alternate electron acceptors                                                                                                                                                                                                      |



|         |        |        |      |        |        |      |        |       |      |                                                                                                                                                                                                                                                                                                    |
|---------|--------|--------|------|--------|--------|------|--------|-------|------|----------------------------------------------------------------------------------------------------------------------------------------------------------------------------------------------------------------------------------------------------------------------------------------------------|
| NGO1427 | 0.9556 | -1.03  | down | 0.7651 | -1.11  | down | 0.2025 | -1.58 | down | putative transcriptional regulator; repressor\<br>Context:(NC_002946)-[1389199-1389909]\ Notes:Best Blastp Hit: gb AAF40984.1  (AE002411) repressor protein; putative [Neisseria meningitidis MC58]                                                                                                |
| NGO1428 | 0.1282 | -2.23  | down | 0.4343 | -1.46  | down | 0.2483 | -2.33 | down | hypothetical protein\<br>Context:(NC_002946)+[1390072-1390344]\ Notes:Best Blastp Hit: gb AAF40983.1  (AE002411) hypothetical protein [Neisseria meningitidis MC58]                                                                                                                                |
| NGO1429 | 0.1064 | 3.70   | up   | 0.0211 | 3.09   | up   | 0.1060 | 3.23  | up   | molecular chaperone DnaK\<br>Context:(NC_002946)+[1390552-1392480]\ Notes:heat shock protein 70; assists in folding of nascent polypeptide chains; refolding of misfolded proteins; utilizes ATPase activity to help fold; co-chaperones are DnaJ and GrpE; multiple copies in some bacteria       |
| NGO1430 | 0.0198 | -18.33 | down | 0.0451 | -34.28 | down | 0.5453 | 1.95  | up   | hypothetical protein\<br>Context:(NC_002946)+[1392703-1393950]\ Notes:Best Blastp Hit: gb AAA25906.1  (M60717) nosA [Pseudomonas stutzeri]                                                                                                                                                         |
| NGO1431 | 0.2737 | -2.94  | down | 0.0746 | -8.29  | down | 0.2292 | 2.17  | up   | hypothetical protein\<br>Context:(NC_002946)+[1393922-1394623]\ Notes:Best Blastp Hit: dbj BAA05664.1  (D28119) outer membrane protein C [Pseudomonas aeruginosa] >gi 9949962 gb AAG07177.1 AE004797_12 (AE004797) outer membrane protein OprC [Pseudomonas aeruginosa]                            |
| NGO1432 | 0.0801 | -5.84  | down | 0.0872 | -7.12  | down | 0.5420 | 1.50  | up   | hypothetical protein\<br>Context:(NC_002946)+[1394680-1395657]\ Notes:Best Blastp Hit: pir D72405 hypothetical protein - Thermotoga maritima (strain MSB8) >gi 4980699 gb AAD35294.1 AE001705_5 (AE001705) hypothetical protein [Thermotoga maritima] COG0715 Putative taurine-binding periplasmic |
| NGO1433 | 0.8788 | 1.14   | up   | 0.1434 | -5.92  | down | 0.7295 | -1.52 | down | putative ABC transporter; permease protein\<br>Context:(NC_002946)+[1396210-1396911]\ Notes:Best Blastp Hit: gb AAG07323.1 AE004811_6 (AE004811) probable permease of ABC taurine transporter [Pseudomonas aeruginosa] COG0600 Uncharacterized permeases                                           |
| NGO1434 | 0.9658 | -1.02  | down | 0.6023 | -1.29  | down | 0.4318 | -1.28 | down | putative ABC transporter; ATP-binding protein\<br>Context:(NC_002946)+[1397102-1397710]\ Notes:Best Blastp Hit: gb AAD31787.1 AF126201_5 (AF126201) AtsC [Pseudomonas putida] COG1116 ABC-type nitrate transport system; ATPase                                                                    |

|         |        |       |      |        |        |      |        |       |      |                                                                                                                                                                                                                                                                                                                                                                                        |
|---------|--------|-------|------|--------|--------|------|--------|-------|------|----------------------------------------------------------------------------------------------------------------------------------------------------------------------------------------------------------------------------------------------------------------------------------------------------------------------------------------------------------------------------------------|
| NGO1435 | 0.5436 | 1.45  | up   | 0.8601 | 1.09   | up   | 0.7996 | 1.10  | up   | CadB\ Context:(NC_002946)+[1397890-1398516]\<br>Notes:Best Blastp Hit: gb AAB51227.1  (AF134905) CadD<br>[Staphylococcus aureus]; putative cadmium resistance<br>protein                                                                                                                                                                                                               |
| NGO1437 | 0.3343 | -1.98 | down | 0.0006 | -33.03 | down | 0.2961 | -2.09 | down | primosome assembly protein PriA\ Context:(NC_002946)-<br>[1399954-1402143]\ Notes:binding of PriA to forked DNA<br>starts the assembly of the primosome; also possesses 3'-5'<br>helicase activity                                                                                                                                                                                     |
| NGO1438 | 0.6293 | 1.25  | up   | 0.9149 | -1.05  | down | 0.9794 | 1.01  | up   | hypothetical protein\ Context:(NC_002946)+[1402283-<br>1403068]\ Notes:Best Blastp Hit: gb AAF40979.1 <br>(AE002411) thiol:disulfide interchange protein DsbC<br>[Neisseria meningitidis MC58]<br>>gi 7379452 emb CAB84014.1  (AL162754) putative<br>thiol:disulphide interchange protein [Neisseria meningitidis]<br>COG1651 protein-disulfide isomerases DsbC/DsbG                   |
| NGO1439 | 0.2776 | -1.94 | down | 0.4096 | -2.35  | down | 0.3204 | 1.91  | up   | putative ABC transporter; ATP-binding protein\<br>Context:(NC_002946)-[1403167-1405101]\ Notes:Best<br>Blastp Hit: pir   C81187 ABC transporter; ATP-binding<br>protein NMB0549 [imported] - Neisseria meningitidis<br>(group B strain MD58) >gi 7225775 gb AAF40978.1 <br>(AE002410) ABC transporter; ATP-binding protein [Neisseria<br>meningitidis MC58] COG0577 Predicted permease |
| NGO1440 | 0.0214 | 3.54  | up   | 0.0356 | 2.29   | up   | 0.1945 | 1.48  | up   | putative ABC transporter; periplasmic protein\<br>Context:(NC_002946)-[1405167-1406345]\ Notes:Best<br>Blastp Hit: emb CAB84012.1  (AL162754) putative<br>periplasmic protein [Neisseria meningitidis] COG0845<br>Membrane permeases; predicted cation efflux                                                                                                                          |
| NGO1441 | 0.7399 | 1.17  | up   | 0.5516 | 1.23   | up   | 0.5644 | -1.25 | down | putative type IV pilin protein\<br>Context:(NC_002946)+[1406571-1406960]\ Notes:Best<br>Blastp Hit: emb CAB84011.1  (AL162754) putative pilin<br>[Neisseria meningitidis]                                                                                                                                                                                                              |
| NGO1442 | 0.5717 | 1.33  | up   | 0.9528 | 1.03   | up   | 0.7687 | 1.09  | up   | alcohol dehydrogenase\ Context:(NC_002946)+[1407240-<br>1408280]\ Notes:similar to zinc-dependent eukaryotic ADH<br>enzymes and distinct from fermentative ADHs                                                                                                                                                                                                                        |

|         |        |        |      |        |        |      |        |       |      |                                                                                                                                                                                                                                                                                                        |
|---------|--------|--------|------|--------|--------|------|--------|-------|------|--------------------------------------------------------------------------------------------------------------------------------------------------------------------------------------------------------------------------------------------------------------------------------------------------------|
| NGO1443 | 0.1915 | 2.00   | up   | 0.2139 | 2.91   | up   | 0.8859 | -1.09 | down | hypothetical protein\ Context:(NC_002946)-[1408581-1412066]\ Notes:Best Blastp Hit: gb AAF40974.1  (AE002410) conserved hypothetical protein [Neisseria meningitidis MC58] COG1196 Chromosome segregation ATPases                                                                                      |
| NGO1444 | 0.9236 | -1.06  | down | 0.0076 | -16.26 | down | 0.9267 | -1.08 | down | hypothetical protein\ Context:(NC_002946)+[1412050-1412229]\ Notes:                                                                                                                                                                                                                                    |
| NGO1445 | 0.7532 | -1.17  | down | 0.9513 | 1.03   | up   | 0.2116 | -1.45 | down | hypothetical protein\ Context:(NC_002946)+[1412494-1413162]\ Notes:Best Blastp Hit: gb AAG01335.1 AF288222_1 (AF288222) putative outer membrane protein XadA [Xanthomonas oryzae pv. oryzae]                                                                                                           |
| NGO1446 | 0.0074 | -10.41 | down | 0.0807 | -3.06  | down | 0.1979 | -3.05 | down | hypothetical protein\ Context:(NC_002946)+[1413134-1413619]\ Notes:Best Blastp Hit: sp P31489 YADA_YEREN invasin precursor (outer membrane adhesin) >gi 96987 pir   S04912 yopA protein - Yersinia enterocolitica plasmid pYV6471/76 >gi 48607 emb CAA32086.1  (X13882) YadA [Yersinia enterocolitica] |
| NGO1447 | 0.0284 | -25.37 | down | 0.5193 | -1.65  | down | 0.8768 | 1.37  | up   | hypothetical protein\ Context:(NC_002946)+[1413742-1413864]\ Notes:                                                                                                                                                                                                                                    |
| NGO1448 | 0.1815 | -2.14  | down | 0.2144 | -2.64  | down | 0.6476 | -1.55 | down | UDP-2;3-diacylglucosamine hydrolase\ Context:(NC_002946)+[1413828-1414550]\ Notes:catalyzes the formation of 2;3=diacylglucosamine 1-phosphate from UDP-2;3=diacylglucosamine                                                                                                                          |
| NGO1449 | 0.9691 | 1.02   | up   | 0.3799 | -1.37  | down | 0.6769 | -1.15 | down | LctP\ Context:(NC_002946)+[1414819-1416405]\ Notes:Best Blastp Hit: possibly phase variable - 8A residue homopolymer repeat in the coding sequence (ON) COG1620 L-lactate permease; putative L-lactate permease                                                                                        |
| NGO1450 | 0.7245 | 1.20   | up   | 0.9557 | -1.02  | down | 0.4821 | -1.24 | down | hypothetical protein\ Context:(NC_002946)-[1416571-1416774]\ Notes:Best Blastp Hit: gb AAF40971.1  (AE002410) hypothetical protein [Neisseria meningitidis MC58]                                                                                                                                       |
| NGO1451 | 0.4017 | -1.83  | down | 0.0319 | -8.64  | down | 0.7116 | -1.51 | down | hypothetical protein\ Context:(NC_002946)+[1416890-1417387]\ Notes:Best Blastp Hit: pir   C81186 hypothetical protein NMB0541 [imported] - Neisseria meningitidis (group B strain MD58) >gi 7225767 gb AAF40970.1  (AE002410) hypothetical protein [Neisseria meningitidis MC58]                       |

|         |        |      |    |        |       |      |        |      |    |                                                                                                                                                                                                                                                                                                                                                                                                                                                                                               |
|---------|--------|------|----|--------|-------|------|--------|------|----|-----------------------------------------------------------------------------------------------------------------------------------------------------------------------------------------------------------------------------------------------------------------------------------------------------------------------------------------------------------------------------------------------------------------------------------------------------------------------------------------------|
| NGO1452 | 0.3833 | 1.60 | up | 0.3224 | 1.39  | up   | 0.5551 | 1.15 | up | aromatic amino acid aminotransferase\<br>Context:(NC_002946)+[1417469-1418659]\ Notes:catalyzes<br>the formation of L-glutamate and an aromatic oxo acid<br>from an aromatic amino acid and 2-oxoglutarate                                                                                                                                                                                                                                                                                    |
| NGO1454 | 0.1055 | 2.23 | up | 0.0694 | 2.17  | up   | 0.1320 | 1.54 | up | lysyl-tRNA synthetase\<br>Context:(NC_002946)-[1419715-<br>1421226]\ Notes:class II; LysRS2; catalyzes a two-step<br>reaction; first charging a lysine molecule by linking its<br>carboxyl group to the alpha-phosphate of ATP; followed by<br>transfer of the aminoacyl-adenylate to its tRNA; in<br>Methanosarcina barkeri; LysRS2 charges both tRNA<br>molecules for lysine that exist in this organism and in<br>addition can charge the tRNAPyl with lysine in the presence<br>of LysRS1 |
| NGO1455 | 0.4761 | 1.62 | up | 0.2024 | -2.94 | down | 0.7305 | 1.31 | up | hypothetical protein\<br>Context:(NC_002946)-[1421381-<br>1422634]\ Notes:Best Blastp Hit: gb AAF41787.1 <br>(AE002492) hypothetical protein [Neisseria meningitidis<br>MC58] >gi 7380281 emb CAB84867.1  (AL162756)<br>putative integral membrane protein [Neisseria meningitidis]                                                                                                                                                                                                           |
| NGO1456 | 0.1996 | 2.15 | up | 0.2398 | 1.52  | up   | 0.0328 | 2.21 | up | putative aminopeptidase\<br>Context:(NC_002946)+[1423093-<br>1424889]\ Notes:Best Blastp Hit: pir D81858 probable<br>aminopeptidase NMA1640 [imported] - Neisseria<br>meningitidis (group A strain Z2491)<br>>gi 7380282 emb CAB84868.1  (AL162756) putative<br>aminopeptidase [Neisseria meningitidis] COG0006 Xaa-Pro<br>aminopeptidase                                                                                                                                                     |
| NGO1457 | 0.2173 | 1.86 | up | 0.3555 | 1.83  | up   | 0.0894 | 2.14 | up | hypothetical protein\<br>Context:(NC_002946)+[1425019-<br>1425291]\ Notes:Best Blastp Hit: gb AAF41506.1 <br>(AE002461) hypothetical protein [Neisseria meningitidis<br>MC58]                                                                                                                                                                                                                                                                                                                 |
| NGO1458 | 0.3544 | 1.73 | up | 0.8431 | -1.19 | down | 0.4079 | 2.62 | up | hypothetical protein\<br>Context:(NC_002946)+[1425288-<br>1425692]\ Notes:Best Blastp Hit: emb CAB83729.1 <br>(AL162753) putative DNA helicase [Neisseria meningitidis]                                                                                                                                                                                                                                                                                                                       |

|         |        |        |      |        |        |      |        |       |      |                                                                                                                                                                                                                                                                                                                     |
|---------|--------|--------|------|--------|--------|------|--------|-------|------|---------------------------------------------------------------------------------------------------------------------------------------------------------------------------------------------------------------------------------------------------------------------------------------------------------------------|
| NGO1459 | 0.0135 | -22.80 | down | 0.2670 | -1.82  | down | 0.2344 | 3.22  | up   | hypothetical protein\ Context:(NC_002946)+[1425714-1425971]\ Notes:Best Blastp Hit: pir   A81102 transcription-repair coupling factor NMB1281 [imported] - Neisseria meningitidis (group B strain MD58)<br>>gi 7226520 gb AAF41657.1  (AE002476) transcription-repair coupling factor [Neisseria meningitidis MC58] |
| NGO1460 | 0.0714 | -4.20  | down | 0.6731 | -1.70  | down | 0.5780 | 1.52  | up   | hypothetical protein\ Context:(NC_002946)+[1425993-1426172]\ Notes:                                                                                                                                                                                                                                                 |
| NGO1461 | 0.0504 | -4.76  | down | 0.0615 | -8.44  | down | 0.4841 | -1.48 | down | hypothetical protein\ Context:(NC_002946)-[1426490-1427032]\ Notes:Best Blastp Hit: gb AAF41506.1  (AE002461) hypothetical protein [Neisseria meningitidis MC58]                                                                                                                                                    |
| NGO1463 | 0.3992 | 2.26   | up   | 0.6338 | -2.74  | down | 0.3804 | -4.25 | down | hypothetical protein\ Context:(NC_002946)+[1427461-1427640]\ Notes:                                                                                                                                                                                                                                                 |
| NGO1465 | 0.0014 | -25.54 | down | 0.0100 | -24.59 | down | 0.2565 | -1.81 | down | hypothetical protein\ Context:(NC_002946)-[1428738-1429151]\ Notes:Best Blastp Hit: gb AAD38303.1 AF036242_3 (AF036242) unknown [Neisseria meningitidis]                                                                                                                                                            |
| NGO1466 | 0.2422 | -2.22  | down | 0.5789 | 1.59   | up   | 0.3506 | -1.62 | down | bifunctional phosphoribosylaminoimidazolecarboxamide formyltransferase/IMP cyclohydrolase\ Context:(NC_002946)-[1429169-1430749]\ Notes:involved in de novo purine biosynthesis                                                                                                                                     |
| NGO1467 | 0.1993 | -2.19  | down | 0.0675 | -3.27  | down | 0.3862 | -1.34 | down | hypothetical protein\ Context:(NC_002946)-[1430910-1432052]\ Notes:Best Blastp Hit: gb AAF41386.1  (AE002449) chloride channel protein-related protein [Neisseria meningitidis MC58] COG0038 Permease; putative chloride channel                                                                                    |
| NGO1468 | 0.1292 | 2.37   | up   | 0.1057 | 1.82   | up   | 0.7214 | -1.12 | down | hypothetical protein\ Context:(NC_002946)-[1432197-1433030]\ Notes:Best Blastp Hit: gb AAF41385.1  (AE002449) phosphoserine phosphatase [Neisseria meningitidis MC58] COG0560 Phosphoserine phosphatase                                                                                                             |
| NGO1469 | 0.5743 | -1.90  | down | 0.0261 | -8.28  | down | 0.8244 | -1.17 | down | hypothetical protein\ Context:(NC_002946)+[1433076-1433204]\ Notes:Best Blastp Hit: emb CAB84440.1  (AL162755) hypothetical protein NMA1178 [Neisseria meningitidis]                                                                                                                                                |

|         |        |       |      |        |       |      |        |       |      |                                                                                                                                                                                                                                                                                                                                                                                                     |
|---------|--------|-------|------|--------|-------|------|--------|-------|------|-----------------------------------------------------------------------------------------------------------------------------------------------------------------------------------------------------------------------------------------------------------------------------------------------------------------------------------------------------------------------------------------------------|
| NGO1470 | 0.0140 | 3.99  | up   | 0.1104 | 2.01  | up   | 0.0431 | 2.04  | up   | NAD(P) transhydrogenase subunit alpha\<br>Context:(NC_002946)+[1433319-1434857]\ Notes:forms a tetramer composed of 2 alpha subunits and 2 beta subunits in the inner membrane; involved in catalyzing transfer of hydride ion equivalents between NAD and NADP; stereospecific (AB-specific); functions as a proton pump by translocating protons from cytoplasm to periplasm                      |
| NGO1471 | 0.2435 | 1.76  | up   | 0.0490 | 2.08  | up   | 0.0987 | 2.05  | up   | hypothetical protein\<br>Context:(NC_002946)+[1434861-1435244]\ Notes:Best Blastp Hit: pir   E81134 hypothetical protein NMB0979 [imported] - Neisseria meningitidis (group B strain MD58) >gi 7226219 gb AAF41383.1  (AE002449) hypothetical protein [Neisseria meningitidis MC58]                                                                                                                 |
| NGO1472 | 0.0089 | 4.64  | up   | 0.0238 | 2.62  | up   | 0.0295 | 2.69  | up   | pyridine nucleotide transhydrogenase\<br>Context:(NC_002946)+[1435324-1436709]\ Notes:catalyzes reversible transfer of hydride ion equivalent between NAD and NADP; membrane-bound proton pump that translocates protons from cytosolic to periplasmic side of the inner membrane; forms a tetramer composed of two alpha and 2 beta subunits; AB-stereospecific enzyme                             |
| NGO1473 | 0.7675 | 1.15  | up   | 0.7698 | 1.13  | up   | 0.9227 | 1.03  | up   | MdaB\<br>Context:(NC_002946)-[1436917-1437495]\ Notes:Best Blastp Hit: pir   D81979 hypothetical protein NMA0600 [imported] - Neisseria meningitidis (group A strain Z2491) >gi 7379335 emb CAB83890.1  (AL162753) hypothetical protein NMA0600 [Neisseria meningitidis] COG2249 Putative NADPH-quinone reductase; YabF; putative modulator of drug activity                                        |
| NGO1474 | 0.0048 | -5.86 | down | 0.0767 | -6.55 | down | 0.2489 | -2.02 | down | LysR family transcriptional regulator\<br>Context:(NC_002946)+[1437734-1438645]\ Notes:Best Blastp Hit: pir   E81979 probable lysR-family transcription regulator NMA0601 [imported] - Neisseria meningitidis (group A strain Z2491) >gi 7379336 emb CAB83891.1  (AL162753) putative lysR-family transcriptional regulator [Neisseria meningitidis] COG0583 Transcriptional regulators; LysR family |

|         |        |       |      |        |       |      |        |       |      |                                                                                                                                                                                                                                                                                                                                                                                                                                                                                  |
|---------|--------|-------|------|--------|-------|------|--------|-------|------|----------------------------------------------------------------------------------------------------------------------------------------------------------------------------------------------------------------------------------------------------------------------------------------------------------------------------------------------------------------------------------------------------------------------------------------------------------------------------------|
| NGO1475 | 0.9247 | -1.06 | down | 0.0752 | -2.10 | down | 0.1187 | -1.92 | down | hypothetical protein\ Context:(NC_002946)-[1439310-1439669]\ Notes:Best Blastp Hit: pir     B81195 conserved hypothetical protein NMB0479 [imported] - Neisseria meningitidis (group B strain MD58; group A strain Z2491)<br>>gi 7225707 gb AAF40916.1  (AE002404) conserved hypothetical protein [Neisseria meningitidis MC58]<br>>gi 7380635 emb CAB85225.1  (AL162757) conserved hypothetical protein [Neisseria meningitidis] COG2018 Uncharacterized ACR; distantly related |
| NGO1476 | 0.0918 | -2.65 | down | 0.2851 | -1.83 | down | 0.4969 | -1.36 | down | hypothetical protein\ Context:(NC_002946)-[1439690-1440205]\ Notes:Best Blastp Hit: pir     A81195 hypothetical protein NMB0478 [imported] - Neisseria meningitidis (group B strain MD58; group A strain Z2491)<br>>gi 7225706 gb AAF40915.1  (AE002404) hypothetical protein [Neisseria meningitidis MC58]<br>>gi 7380636 emb CAB85226.1  (AL162757) hypothetical protein [Neisseria meningitidis]                                                                              |
| NGO1478 | 0.0305 | -4.56 | down | 0.8940 | -1.05 | down | 0.1473 | -3.36 | down | hypothetical protein\ Context:(NC_002946)-[1440881-1441126]\ Notes:Best Blastp Hit: pir     G81194 hypothetical protein NMB0476 [imported] - Neisseria meningitidis (group B strain MD58; group A strain Z2491)<br>>gi 7225704 gb AAF40913.1  (AE002404) hypothetical protein [Neisseria meningitidis MC58]<br>>gi 7380638 emb CAB85228.1  (AL162757) hypothetical protein [Neisseria meningitidis]                                                                              |
| NGO1479 | 0.0659 | -2.70 | down | 0.0600 | -2.76 | down | 0.0148 | -6.48 | down | hypothetical protein\ Context:(NC_002946)-[1441350-1441979]\ Notes:Best Blastp Hit: pir     G81194 hypothetical protein NMB0476 [imported] - Neisseria meningitidis (group B strain MD58; group A strain Z2491)<br>>gi 7225704 gb AAF40913.1  (AE002404) hypothetical protein [Neisseria meningitidis MC58]<br>>gi 7380638 emb CAB85228.1  (AL162757) hypothetical protein [Neisseria meningitidis]                                                                              |
| NGO1481 | 0.5491 | -1.61 | down | 0.2978 | 1.41  | up   | 0.4599 | -1.80 | down | hypothetical protein\ Context:(NC_002946)-[1443640-1444422]\ Notes:Best Blastp Hit: emb CAB85230.1  (AL162757) conserved hypothetical protein [Neisseria meningitidis] COG0500 SAM-dependent methyltransferases                                                                                                                                                                                                                                                                  |

|         |        |       |      |        |       |      |        |       |      |                                                                                                                                                                                                                                                                                                                                  |
|---------|--------|-------|------|--------|-------|------|--------|-------|------|----------------------------------------------------------------------------------------------------------------------------------------------------------------------------------------------------------------------------------------------------------------------------------------------------------------------------------|
| NGO1482 | 0.8101 | -1.11 | down | 0.0982 | 2.27  | up   | 0.4318 | -1.49 | down | hypothetical protein\ Context:(NC_002946)-[1444410-1445057]\ Notes:Best Blastp Hit: pir    G81830 conserved hypothetical protein NMA2012 [imported] - Neisseria meningitidis (group A strain Z2491)<br>>gi 7380641 emb CAB85231.1  (AL162757) conserved hypothetical protein [Neisseria meningitidis]                            |
| NGO1483 | 0.8391 | -1.11 | down | 0.4870 | -1.29 | down | 0.3830 | -1.60 | down | 8-amino-7-oxononanoate synthase\ Context:(NC_002946)-[1445067-1446209]\ Notes:catalyzes the formation of 8-amino-7-oxononanoate from 6-carboxyhexanoyl-CoA and L-alanine                                                                                                                                                         |
| NGO1484 | 0.0721 | -2.61 | down | 0.0767 | -2.62 | down | 0.1696 | -1.53 | down | hypothetical protein\ Context:(NC_002946)+[1446432-1447508]\ Notes:Best Blastp Hit: emb   CAB85233.1   (AL162757) hypothetical protein [Neisseria meningitidis] COG1376 Uncharacterized ACR; ErfK family                                                                                                                         |
| NGO1485 | 0.0161 | 4.25  | up   | 0.0334 | 3.28  | up   | 0.0830 | 2.13  | up   | hypothetical protein\ Context:(NC_002946)-[1447712-1449178]\ Notes:Best Blastp Hit: pir    A81194 C4-dicarboxylate transporter NMB0470 [imported] - Neisseria meningitidis (group B strain MD58)<br>>gi 7225698 gb AAF40907.1  (AE002404) C4-dicarboxylate transporter [Neisseria meningitidis MC58] COG0471 Cation transporters |
| NGO1486 | 0.2563 | 1.89  | up   | 0.0817 | 2.07  | up   | 0.0782 | 2.18  | up   | agmatinase\ Context:(NC_002946)-[1449376-1450299]\ Notes:catalyzes the formation of putrescine from agmatine                                                                                                                                                                                                                     |
| NGO1487 | 0.0384 | 3.24  | up   | 0.0149 | 2.91  | up   | 0.0598 | 1.98  | up   | arginine decarboxylase\ Context:(NC_002946)-[1450398-1452290]\ Notes:catalyzes the formation of agmatine from arginine in putrescine and spermidine biosynthesis                                                                                                                                                                 |
| NGO1488 | 0.7389 | -1.28 | down | 0.7535 | -1.15 | down | 0.5499 | -1.73 | down | hypothetical protein\ Context:(NC_002946)-[1452457-1452741]\ Notes:Best Blastp Hit: gb AAF40904.1  (AE002403) hypothetical protein [Neisseria meningitidis MC58]                                                                                                                                                                 |
| NGO1489 | 0.1381 | 2.14  | up   | 0.0610 | 3.63  | up   | 0.2186 | 1.69  | up   | aspartyl-tRNA synthetase\ Context:(NC_002946)-[1452891-1454441]\ Notes:Catalyzes a two-step reaction; first charging an aspartate molecule by linking its carboxyl group to the alpha-phosphate of ATP; followed by transfer of the aminoacyl-adenylate to its tRNA                                                              |



|         |        |       |      |        |       |      |        |       |      |                                                                                                                                                                                                                                                                                                                                                                                                                                                                                                                         |
|---------|--------|-------|------|--------|-------|------|--------|-------|------|-------------------------------------------------------------------------------------------------------------------------------------------------------------------------------------------------------------------------------------------------------------------------------------------------------------------------------------------------------------------------------------------------------------------------------------------------------------------------------------------------------------------------|
| NGO1490 | 0.4077 | 1.43  | up   | 0.8498 | -1.08 | down | 0.9217 | -1.03 | down | putative aspartyl-tRNA synthetase\ Context:(NC_002946)-[1454443-1454697]\ Notes:Best Blastp Hit: pir    F81831 aspartate--tRNA ligase (EC 6.1.1.12) NMA2019 [imported] - Neisseria meningitidis (group A strain Z2491) >gi 7380648 emb CAB85238.1  (AL162757)                                                                                                                                                                                                                                                           |
| NGO1491 | 0.4249 | 1.54  | up   | 0.3620 | 1.48  | up   | 0.9473 | -1.02 | down | hypothetical protein\ Context:(NC_002946)-[1454755-1455492]\ Notes:Best Blastp Hit: pir    G81831 probable integral membrane protein NMA2020 [imported] - Neisseria meningitidis (group A strain Z2491) >gi 7380649 emb CAB85239.1  (AL162757) putative integral membrane protein [Neisseria meningitidis]                                                                                                                                                                                                              |
| NGO1492 | 0.9737 | -1.02 | down | 0.3459 | -1.47 | down | 0.3620 | -1.33 | down | putative phospholipase\ Context:(NC_002946)-[1455598-1456746]\ Notes:Best Blastp Hit: emb CAB85240.1  (AL162757) putative phospholipase [Neisseria meningitidis]                                                                                                                                                                                                                                                                                                                                                        |
| NGO1493 | 0.0749 | 3.10  | up   | 0.2084 | 1.75  | up   | 0.2008 | 1.50  | up   | 30S ribosomal protein S20\ Context:(NC_002946)-[1456906-1457169]\ Notes:binds directly to the 16S rRNA and is involved in post-translational inhibition of arginine and ornithine decarboxylase                                                                                                                                                                                                                                                                                                                         |
| NGO1494 | 0.1401 | 2.35  | up   | 0.3173 | 1.43  | up   | 0.2787 | 1.61  | up   | putative ABC transporter; periplasmic binding protein; polyamine\ Context:(NC_002946)+[1457473-1458615]\ Notes:Best Blastp Hit: pir    C81195 spermidine/putrescine ABC transporter; periplasmic spermidine/putrescine-binding protein NMB0462 [imported] - Neisseria meningitidis (group B strain MD58) >gi 7225689 gb AAF40899.1  (AE002403) spermidine/putrescine ABC transporter; periplasmic spermidine/putrescine-binding protein [Neisseria meningitidis MC58] COG0687 Spermidine/putrescine-binding periplasmic |
| NGO1495 | 0.0007 | 12.12 | up   | 0.0013 | 7.11  | up   | 0.0011 | 7.36  | up   | TbpA\ Context:(NC_002946)-[1460228-1462966]\ Notes:Best Blastp Hit: gb AAF74987.1  (AF124339) transferrin-binding protein A [Neisseria gonorrhoeae] COG1629 Outer membrane receptor proteins; mostly                                                                                                                                                                                                                                                                                                                    |
| NGO1496 | 0.0005 | 13.85 | up   | 0.0005 | 10.24 | up   | 0.0014 | 8.79  | up   | TbpB\ Context:(NC_002946)-[1463053-1465164]\ Notes:Best Blastp Hit: possibly phase variable - 8T residue homopolymer repeat in the coding sequence (ON); transferrin-binding protein B                                                                                                                                                                                                                                                                                                                                  |
| NGO1497 | 0.5650 | -2.34 | down | 0.5911 | -1.33 | down | 0.4151 | -2.60 | down | hypothetical protein\ Context:(NC_002946)-[1465247-1465390]\ Notes:                                                                                                                                                                                                                                                                                                                                                                                                                                                     |

|         |        |       |      |        |       |      |        |       |      |                                                                                                                                                                                                                                                                                                                                                       |
|---------|--------|-------|------|--------|-------|------|--------|-------|------|-------------------------------------------------------------------------------------------------------------------------------------------------------------------------------------------------------------------------------------------------------------------------------------------------------------------------------------------------------|
| NGO1498 | 0.0131 | 12.95 | up   | 0.1154 | 3.74  | up   | 0.1111 | 1.84  | up   | hypothetical protein\ Context:(NC_002946)-[1465500-1465661]\ Notes:Best Blastp Hit: emb CAB83896.1  (AL162753) hypothetical protein NMA0606 [Neisseria meningitidis]                                                                                                                                                                                  |
| NGO1499 | 0.9722 | 1.02  | up   | 0.2582 | -2.05 | down | 0.8543 | -1.09 | down | hypothetical protein\ Context:(NC_002946)+[1467069-1468178]\ Notes:Best Blastp Hit: emb CAB84863.1  (AL162756) hypothetical protein [Neisseria meningitidis]                                                                                                                                                                                          |
| NGO1500 | 0.1493 | -2.24 | down | 0.0208 | -4.37 | down | 0.1058 | -2.19 | down | glutamate racemase\ Context:(NC_002946)-[1468907-1469719]\ Notes:converts L-glutamate to D-glutamate; a component of peptidoglycan                                                                                                                                                                                                                    |
| NGO1501 | 0.8727 | -1.09 | down | 0.6295 | -1.27 | down | 0.0843 | -2.17 | down | hypothetical protein\ Context:(NC_002946)+[1469908-1470369]\ Notes:Best Blastp Hit: pir F81832 conserved hypothetical protein NMA2027 [imported] - Neisseria meningitidis (group A strain Z2491)<br>>gi 7380656 emb CAB85246.1  (AL162757) conserved hypothetical protein [Neisseria meningitidis] COG0802 Predicted nucleotide-binding protein; YjeE |
| NGO1502 | 0.2448 | -2.07 | down | 0.2060 | -1.94 | down | 0.1439 | -1.61 | down | putative amidase\ Context:(NC_002946)+[1470318-1471616]\ Notes:Best Blastp Hit: gb AAF06680.1 AF163663_5 (AF058689) putative N-acetylmuramoyl-L-alanine amidase-precursor AmiC [Neisseria meningitidis] COG0860 N-acetylmuramoyl-L-alanine amidase                                                                                                    |
| NGO1503 | 0.4852 | 1.46  | up   | 0.4260 | 1.30  | up   | 0.8088 | -1.09 | down | hypothetical protein\ Context:(NC_002946)+[1471644-1472516]\ Notes:Best Blastp Hit: emb CAB85248.1  (AL162757) hypothetical protein [Neisseria meningitidis]                                                                                                                                                                                          |
| NGO1504 | 0.3348 | 1.53  | up   | 0.4639 | 1.26  | up   | 0.4330 | 1.23  | up   | hypothetical protein\ Context:(NC_002946)-[1472562-1473704]\ Notes:Best Blastp Hit: gb AAF40892.1  (AE002401) conserved hypothetical protein [Neisseria meningitidis MC58] COG0116 Predicted N6-adenine-specific DNA                                                                                                                                  |

|         |        |       |      |        |       |      |        |       |      |                                                                                                                                                                                                                                                                                                                                                                                                                                                        |
|---------|--------|-------|------|--------|-------|------|--------|-------|------|--------------------------------------------------------------------------------------------------------------------------------------------------------------------------------------------------------------------------------------------------------------------------------------------------------------------------------------------------------------------------------------------------------------------------------------------------------|
| NGO1505 | 0.9996 | -1.00 | down | 0.6673 | -1.16 | down | 0.8187 | -1.11 | down | hypothetical protein\ Context:(NC_002946)-[1473753-1474175]\ Notes:Best Blastp Hit: pir    H81197 probable secreted protein NMA2031; NMB0454 [imported] - Neisseria meningitidis (group B strain MD58; group A strain Z2491) >gi 6274535 gb AAF06683.1 AF163663_8 (AF058689) Tou4 [Neisseria meningitidis] >gi 6449089 gb AAF08818.1 AF194079_5 (AF194079) Tou4 putative secreted protein [Neisseria meningitidis]                                     |
| NGO1506 | 0.7761 | 1.13  | up   | 0.3459 | 1.38  | up   | 0.9516 | -1.02 | down | putative NTP pyrophosphohydrolase\ Context:(NC_002946)-[1474168-1474977]\ Notes:Best Blastp Hit: gb AAF40890.1  (AE002401) mutT protein [Neisseria meningitidis MC58] COG0494 NTP pyrophosphohydrolases (MutT family)                                                                                                                                                                                                                                  |
| NGO1507 | 0.2157 | 1.91  | up   | 0.7955 | 1.15  | up   | 0.4273 | 1.27  | up   | putative acyl-carrier protein synthase\ Context:(NC_002946)-[1475059-1475436]\ Notes:Best Blastp Hit: pir    F81197 holo-(acyl-carrier protein) synthase NMB0452 [imported] - Neisseria meningitidis (group B strain MD58) >gi 6449091 gb AAF08820.1 AF194079_7 (AF194079) Djj [Neisseria meningitidis] >gi 7225677 gb AAF40889.1  (AE002401) holo-(acyl-carrier protein) synthase [Neisseria meningitidis MC58] COG0736 Acyl-carrier protein synthase |
| NGO1508 | 0.8768 | 1.07  | up   | 0.1858 | 1.71  | up   | 0.8209 | 1.06  | up   | pyridoxal phosphate biosynthetic protein PdxJ\ Context:(NC_002946)-[1475486-1476214]\ Notes:involved in the de novo synthesis of pyridoxine (Vitamin B6)                                                                                                                                                                                                                                                                                               |
| NGO1509 | 0.1394 | 2.78  | up   | 0.4106 | 1.45  | up   | 0.4411 | -1.23 | down | hypothetical protein\ Context:(NC_002946)-[1476267-1477010]\ Notes:Best Blastp Hit: sp Q9ZHY2 RECO_NEIGO DNA repair protein RECO (recombination protein O) >gi 4105531 gb AAD05426.1  (AF047375) RecO [Neisseria gonorrhoeae] COG1381 Recombination protein RecO                                                                                                                                                                                       |
| NGO1510 | 0.6834 | 1.22  | up   | 0.9438 | -1.03 | down | 0.6471 | -1.14 | down | putative chorismate mutase\ Context:(NC_002946)-[1477047-1478174]\ Notes:Best Blastp Hit: gb AAD05425.1  (AF047375) PheA [Neisseria gonorrhoeae] COG0077 Prephenate dehydratase                                                                                                                                                                                                                                                                        |

|         |        |        |      |        |        |      |        |       |      |                                                                                                                                                                                                                                                                                                                         |
|---------|--------|--------|------|--------|--------|------|--------|-------|------|-------------------------------------------------------------------------------------------------------------------------------------------------------------------------------------------------------------------------------------------------------------------------------------------------------------------------|
| NGO1511 | 0.0224 | -3.57  | down | 0.0200 | -3.69  | down | 0.0591 | -2.06 | down | putative drug resistance protein\ Context:(NC_002946)-[1477747-1479249]\ Notes:Best Blastp Hit: gb AAF08825.1 AF194079_12 (AF194079) Bcr [Neisseria meningitidis] COG0477 Permeases                                                                                                                                     |
| NGO1512 | 0.3679 | -1.94  | down | 0.0905 | -2.77  | down | 0.1475 | -3.06 | down | hypothetical protein\ Context:(NC_002946)-[1479533-1480408]\ Notes:Best Blastp Hit: gb AAF40881.1  (AE002400) conserved hypothetical protein [Neisseria meningitidis MC58] COG0697 Predicted permeases                                                                                                                  |
| NGO1513 | 0.1085 | 3.05   | up   | 0.1086 | 2.03   | up   | 0.2274 | 1.77  | up   | OpaD\ Context:(NC_002946)+[1481445-1482281]\ Notes:Best Blastp Hit: phase variable - 13 tandem repeats of CTCTT in the coding sequence (ON); outer membrane opacity protein D                                                                                                                                           |
| NGO1514 | 0.0605 | -2.69  | down | 0.0869 | -1.87  | down | 0.0055 | -2.64 | down | hypothetical protein\ Context:(NC_002946)-[1482948-1483862]\ Notes:Best Blastp Hit: pir   B81199 nitrilase NMB0441 [imported] - Neisseria meningitidis (group B strain MD58) >gi 7225666 gb AAF40879.1  (AE002400) nitrilase [Neisseria meningitidis MC58] COG0388 Predicted amidohydrolase                             |
| NGO1515 | 0.2406 | 1.96   | up   | 0.1101 | -2.13  | down | 0.7056 | -1.24 | down | putative oxidoreductase\ Context:(NC_002946)+[1483845-1484717]\ Notes:Best Blastp Hit: pir   A81775 probable oxidoreductase NMA2045 [imported] - Neisseria meningitidis (group A strain Z2491) >gi 7380673 emb CAB85263.1  (AL162758) putative oxidoreductase [Neisseria meningitidis] COG0287 Prephenate dehydrogenase |
| NGO1516 | 0.0008 | -22.21 | down | 0.0006 | -28.07 | down | 0.0079 | -7.59 | down | hypothetical protein\ Context:(NC_002946)-[1484775-1485977]\ Notes:Best Blastp Hit: emb CAB85264.1  (AL162758) hypothetical integral membrane protein [Neisseria meningitidis]                                                                                                                                          |
| NGO1517 | 0.7362 | -1.19  | down | 0.2565 | -1.77  | down | 0.2974 | -1.48 | down | hypothetical protein\ Context:(NC_002946)-[1485974-1486342]\ Notes:Best Blastp Hit: pir   C81775 hypothetical protein NMA2047 [imported] - Neisseria meningitidis (group A strain Z2491) >gi 7380675 emb CAB85265.1  (AL162758) hypothetical protein [Neisseria meningitidis]                                           |
| NGO1518 | 0.0041 | -7.57  | down | 0.0518 | -5.08  | down | 0.7923 | -1.31 | down | hypothetical protein\ Context:(NC_002946)-[1486339-1487112]\ Notes:Best Blastp Hit: emb CAB63177.1  (AL133469) hypothetical protein SCM10.16c [Streptomyces coelicolor A3(2)]                                                                                                                                           |

|         |        |       |      |        |        |      |        |       |      |                                                                                                                                                                                                                                                                                                                                                   |
|---------|--------|-------|------|--------|--------|------|--------|-------|------|---------------------------------------------------------------------------------------------------------------------------------------------------------------------------------------------------------------------------------------------------------------------------------------------------------------------------------------------------|
| NGO1519 | 0.7430 | -1.22 | down | 0.3750 | -1.38  | down | 0.1503 | -1.66 | down | hypothetical protein\ Context:(NC_002946)+[1486516-1486959]\ Notes:Best Blastp Hit: pir     D81775 conserved hypothetical protein NMA2048 [imported] - Neisseria meningitidis (group A strain Z2491) >gi 7380676 emb CAB85266.1  (AL162758) conserved hypothetical protein [Neisseria meningitidis] COG1959 Uncharacterized BCR; YjeB/RRF2 family |
| NGO1520 | 0.5583 | -1.31 | down | 0.2223 | -1.77  | down | 0.1191 | -2.20 | down | hypothetical protein\ Context:(NC_002946)-[1487121-1487825]\ Notes:Best Blastp Hit: pir     E81198 conserved hypothetical protein NMB0436 [imported] - Neisseria meningitidis (group B strain MD58) >gi 7225661 gb AAF40874.1  (AE002400) conserved hypothetical protein [Neisseria meningitidis MC58] COG0009 Putative translation factor (SUA5) |
| NGO1521 | 0.1642 | -2.81 | down | 0.0016 | -14.09 | down | 0.5842 | -1.56 | down | putative acetate kinase\ Context:(NC_002946)-[1487852-1489051]\ Notes:Best Blastp Hit: pir     D81198 acetate kinase NMB0435 [imported] - Neisseria meningitidis (group B strain MD58) >gi 7225660 gb AAF40873.1  (AE002400) acetate kinase [Neisseria meningitidis MC58] COG0282 Acetate kinase                                                  |
| NGO1524 | 0.0183 | -6.09 | down | 0.0987 | -4.08  | down | 0.8279 | -1.11 | down | hypothetical protein\ Context:(NC_002946)-[1493757-1494545]\ Notes:Best Blastp Hit: gb AAF40870.1  (AE002399) conserved hypothetical protein [Neisseria meningitidis MC58] COG0730 Predicted permeases                                                                                                                                            |
| NGO1525 | 0.7051 | 1.46  | up   | 0.0607 | -14.73 | down | 0.7891 | -1.47 | down | methylcitrate synthase\ Context:(NC_002946)-[1494697-1495845]\ Notes:catalyzes the synthesis of 2-methylcitrate from propionyl-CoA and oxaloacetate; also catalyzes the condensation of oxaloacetate with acetyl-CoA but with a lower specificity                                                                                                 |
| NGO1526 | 0.0500 | -4.57 | down | 0.0093 | -18.43 | down | 0.7756 | -1.23 | down | 2-methylisocitrate lyase\ Context:(NC_002946)-[1495930-1496808]\ Notes:catalyzes the formation of pyruvate and succinate from 2-methylisocitrate                                                                                                                                                                                                  |
| NGO1527 | 0.4690 | 1.51  | up   | 0.9025 | -1.08  | down | 0.8319 | 1.07  | up   | hypothetical protein\ Context:(NC_002946)-[1497426-1498736]\ Notes:Best Blastp Hit: pir     D81776 conserved hypothetical protein NMA2056 [imported] - Neisseria meningitidis (group A strain Z2491) >gi 7380684 emb CAB85274.1  (AL162758) conserved hypothetical protein [Neisseria meningitidis] COG2252 Permeases                             |

|         |        |       |      |        |       |      |        |       |      |                                                                                                                                                                                                                                                                                                                                           |
|---------|--------|-------|------|--------|-------|------|--------|-------|------|-------------------------------------------------------------------------------------------------------------------------------------------------------------------------------------------------------------------------------------------------------------------------------------------------------------------------------------------|
| NGO1528 | 0.1606 | 2.12  | up   | 0.6315 | -1.30 | down | 0.6616 | 1.13  | up   | cell division protein FtsZ\ Context:(NC_002946)-[1498872-1500050]\ Notes:GTPase; similar structure to tubulin; forms ring-shaped polymers at the site of cell division; other proteins such as FtsA; ZipA; and ZapA; interact with and regulate FtsZ function                                                                             |
| NGO1529 | 0.3311 | 1.63  | up   | 0.1156 | -2.35 | down | 0.8611 | 1.05  | up   | hypothetical protein\ Context:(NC_002946)-[1500169-1501413]\ Notes:Best Blastp Hit: pir   E81201 cell division protein FtsA NMB0426 [imported] - Neisseria meningitidis (group B strain MD58) >gi 7225649 gb AAF40864.1  (AE002398) cell division protein FtsA [Neisseria meningitidis MC58] COG0849 Predicted ATPases of the HSP70 class |
| NGO1530 | 0.8858 | -1.08 | down | 0.8186 | -1.14 | down | 0.3891 | -1.41 | down | hypothetical protein\ Context:(NC_002946)-[1501499-1502227]\ Notes:Best Blastp Hit: pir   G81776 cell division protein NMA2059 [imported] - Neisseria meningitidis (group A strain Z2491) >gi 7380687 emb CAB85277.1  (AL162758) cell division protein [Neisseria meningitidis] COG1589 Cell division septal protein FtsQ                 |
| NGO1531 | 0.3167 | 2.23  | up   | 0.3498 | -1.64 | down | 0.4848 | -1.38 | down | D-alanine--D-alanine ligase\ Context:(NC_002946)-[1502217-1503131]\ Notes:D-alanine--D-alanine ligase; DdlA; DdlB; cytoplasmic; catalyzes the formation of D-alanyl-D-alanine from two D-alanines in peptidoglycan synthesis; there are two forms of this enzyme in Escherichia coli                                                      |
| NGO1532 | 0.7000 | 1.24  | up   | 0.9800 | -1.01 | down | 0.6314 | 1.15  | up   | UDP-N-acetylmuramate--L-alanine ligase\ Context:(NC_002946)-[1503243-1504652]\ Notes:Catalyzes the formation of UDP-N-acetylmuramoyl-L-alanine from UDP-N-acetylmuramate and L-alanine in peptidoglycan synthesis                                                                                                                         |

|         |        |       |      |        |       |      |        |       |      |                                                                                                                                                                                                                                                                                                                                                                                                                                                                                                                        |
|---------|--------|-------|------|--------|-------|------|--------|-------|------|------------------------------------------------------------------------------------------------------------------------------------------------------------------------------------------------------------------------------------------------------------------------------------------------------------------------------------------------------------------------------------------------------------------------------------------------------------------------------------------------------------------------|
| NGO1533 | 0.3779 | 1.49  | up   | 0.2722 | -1.74 | down | 0.5767 | 1.17  | up   | hypothetical protein\ Context:(NC_002946)-[1504807-1505874]\ Notes:Best Blastp Hit: pir    A81201 UDP-N-acetylglucosamine--N-acetylmuramyl- (pentapeptide) pyrophosphoryl-undecaprenol N-acetylglucosamine transferase NMB0422 [imported] - Neisseria meningitidis (group B strain MD58) >gi 7225645 gb AAF40860.1  (AE002398) UDP-N-acetylglucosamine--N-acetylmuramyl- (pentapeptide) pyrophosphoryl-undecaprenol N-acetylglucosamine transferase [Neisseria meningitidis MC58] COG0707 UDP-glucuronosyltransferases |
| NGO1534 | 0.2274 | -2.39 | down | 0.2441 | -1.82 | down | 0.6096 | -1.24 | down | hypothetical protein\ Context:(NC_002946)-[1505878-1507176]\ Notes:Best Blastp Hit: pir    C81777 cell division protein NMA2063 [imported] - Neisseria meningitidis (group A strain Z2491) >gi 7380691 emb CAB85281.1  (AL162758) cell division protein [Neisseria meningitidis] COG0772 Bacterial cell division membrane protein                                                                                                                                                                                      |
| NGO1535 | 0.1013 | 3.33  | up   | 0.0429 | 3.11  | up   | 0.1356 | 2.32  | up   | UDP-N-acetylmuramoyl-L-alanyl-D-glutamatesynthetase\ Context:(NC_002946)-[1507328-1508665]\ Notes:UDP-N-acetylmuramoylalanine--D-glutamate ligase; involved in peptidoglycan biosynthesis; cytoplasmic; catalyzes the addition of glutamate to the nucleotide precursor UDP-N-acetylmuramoyl-L-alanine during cell wall formation                                                                                                                                                                                      |
| NGO1536 | 0.0362 | 4.08  | up   | 0.0720 | 4.95  | up   | 0.0715 | 4.51  | up   | hypothetical protein\ Context:(NC_002946)-[1508750-1509130]\ Notes:Best Blastp Hit: gb AAF40857.1  (AE002398) conserved hypothetical protein [Neisseria meningitidis MC58] COG0790 TPR repeat proteins                                                                                                                                                                                                                                                                                                                 |
| NGO1537 | 0.7849 | 1.18  | up   | 0.2096 | 2.00  | up   | 0.0667 | 4.87  | up   | phospho-N-acetylmuramoyl-pentapeptide-transferase\ Context:(NC_002946)-[1509255-1510337]\ Notes:First step of the lipid cycle reactions in the biosynthesis of the cell wall peptidoglycan                                                                                                                                                                                                                                                                                                                             |
| NGO1538 | 0.0344 | 3.07  | up   | 0.0248 | 3.75  | up   | 0.1049 | 2.14  | up   | hypothetical protein\ Context:(NC_002946)-[1510582-1510764]\ Notes:Best Blastp Hit: emb CAB85285.1  (AL162758) putative periplasmic protein [Neisseria meningitidis]                                                                                                                                                                                                                                                                                                                                                   |

|         |        |      |    |        |       |      |        |      |    |                                                                                                                                                                                                                                                                                                                                                                                       |
|---------|--------|------|----|--------|-------|------|--------|------|----|---------------------------------------------------------------------------------------------------------------------------------------------------------------------------------------------------------------------------------------------------------------------------------------------------------------------------------------------------------------------------------------|
| NGO1539 | 0.0889 | 2.24 | up | 0.0152 | 2.63  | up   | 0.0552 | 2.00 | up | putative UDP-MurNAc-pentapeptide synthetase\<br>Context:(NC_002946)-[1510761-1512119]\ Notes:Best<br>Blastp Hit: emb CAB85286.1  (AL162758) UDP-MurNAc-<br>pentapeptide synthetase [Neisseria meningitidis] COG0770<br>UDP-N-acetylmuramyl pentapeptide synthase                                                                                                                      |
| NGO1540 | 0.0051 | 7.85 | up | 0.0157 | 4.58  | up   | 0.2637 | 1.85 | up | Dca\<br>Context:(NC_002946)-[1512244-1513890]\ Notes:Best<br>Blastp Hit: gb AAF12796.1 AF195057_1 (AF195057) DcaA<br>[Neisseria gonorrhoeae] COG2194 Predicted membrane-<br>associated; division cell wall protein                                                                                                                                                                    |
| NGO1541 | 0.0086 | 4.31 | up | 0.0175 | 7.26  | up   | 0.0323 | 2.63 | up | UDP-N-acetylmuramoylalanyl-D-glutamate--2; 6-<br>diaminopimelate ligase\<br>Context:(NC_002946)-[1513913-<br>1515391]\ Notes:involved in cell wall formation;<br>peptidoglycan synthesis; cytoplasmic enzyme; catalyzes the<br>addition of meso-diaminopimelic acid to the nucleotide<br>precursor UDP-N-aceylmuramoyl-l-alanyl-d-glutamate                                           |
| NGO1542 | 0.1269 | 2.06 | up | 0.9548 | -1.03 | down | 0.3742 | 1.28 | up | Pbp2\<br>Context:(NC_002946)-[1515416-1517164]\<br>Notes:Best Blastp Hit: pir   S49090 penicillin-binding<br>protein 2 - Neisseria gonorrhoeae<br>>gi 509155 emb CAA42191.1  (X59632) penicillin-binding<br>protein 2 [Neisseria gonorrhoeae] COG0768 Cell division<br>protein                                                                                                        |
| NGO1543 | 0.1240 | 2.39 | up | 0.1483 | 1.82  | up   | 0.2794 | 1.39 | up | hypothetical protein\<br>Context:(NC_002946)-[1517225-<br>1517488]\ Notes:Best Blastp Hit: gb AAF40851.1 <br>(AE002397) cell division protein FtsL-related protein<br>[Neisseria meningitidis MC58]<br>>gi 7380699 emb CAB85290.1  (AL162758) putative small<br>periplasmic protein [Neisseria meningitidis]                                                                          |
| NGO1544 | 0.1536 | 1.96 | up | 0.4385 | 1.40  | up   | 0.2747 | 1.38 | up | S-adenosyl-methyltransferase MraW\<br>Context:(NC_002946)-<br>[1517515-1518471]\ Notes:Best Blastp Hit: pir   D81778<br>conserved hypothetical protein NMA2074 [imported] -<br>Neisseria meningitidis (group A strain Z2491)<br>>gi 7380700 emb CAB85291.1  (AL162758) conserved<br>hypothetical protein [Neisseria meningitidis] COG0275<br>Predicted S-adenosylmethionine-dependent |
| NGO1545 | 0.2109 | 2.00 | up | 0.2814 | 1.56  | up   | 0.3380 | 1.43 | up | cell division protein MraZ\<br>Context:(NC_002946)-[1518468-<br>1518923]\ Notes:MraZ; UPF0040; crystal structure shows<br>similarity to AbrB                                                                                                                                                                                                                                          |



|         |        |       |      |        |       |      |        |       |      |                                                                                                                                                                                                                                                                                                                                                       |
|---------|--------|-------|------|--------|-------|------|--------|-------|------|-------------------------------------------------------------------------------------------------------------------------------------------------------------------------------------------------------------------------------------------------------------------------------------------------------------------------------------------------------|
| NGO1546 | 0.8241 | 1.25  | up   | 0.8407 | 1.25  | up   | 0.6712 | -1.64 | down | hypothetical protein\ Context:(NC_002946)+[1519202-1520449]\ Notes:Best Blastp Hit: pir   F81778 conserved hypothetical protein NMA2076 [imported] - Neisseria meningitidis (group A strain Z2491) >gi 7380702 emb CAB85293.1  (AL162758) conserved hypothetical protein [Neisseria meningitidis] COG1565 Uncharacterized ACR                         |
| NGO1547 | 0.5775 | 1.81  | up   | 0.1329 | -2.78 | down | 0.9090 | 1.08  | up   | hypothetical protein\ Context:(NC_002946)-[1520890-1521711]\ Notes:Best Blastp Hit: pir   E81203 bacitracin resistance protein NMB0408 [imported] - Neisseria meningitidis (group B strain MD58) >gi 7225630 gb AAF40847.1  (AE002396) bacitracin resistance protein [Neisseria meningitidis MC58] COG1968 Uncharacterized ACR; bacitracin resistance |
| NGO1548 | 0.9784 | 1.01  | up   | 0.9081 | 1.05  | up   | 0.9179 | 1.03  | up   | DsbA\ Context:(NC_002946)-[1521744-1522388]\ Notes:Best Blastp Hit: gb AAF40846.1  (AE002396) thiol:disulfide interchange protein DsbA [Neisseria meningitidis MC58] COG0526 Thiol-disulfide isomerase and thioredoxins; putative thiol-disulfide isomerase                                                                                           |
| NGO1549 | 0.6036 | -1.27 | down | 0.9191 | -1.05 | down | 0.6388 | 1.15  | up   | hypothetical protein\ Context:(NC_002946)-[1522391-1523260]\ Notes:Best Blastp Hit: pir   C81203 conserved hypothetical protein NMB0406 [imported] - Neisseria meningitidis (group B strain MD58) >gi 7225628 gb AAF40845.1  (AE002396) conserved hypothetical protein [Neisseria meningitidis MC58]                                                  |
| NGO1550 | 0.7861 | 1.16  | up   | 0.7115 | 1.18  | up   | 0.3098 | 1.37  | up   | hypothetical protein\ Context:(NC_002946)-[1523360-1524856]\ Notes:Best Blastp Hit: pir   B81779 probable chelatase NMA2080 [imported] - Neisseria meningitidis (group A strain Z2491) >gi 7380706 emb CAB85297.1  (AL162758) putative chelatase [Neisseria meningitidis] COG0606 Predicted ATPases                                                   |
| NGO1551 | 0.6656 | -1.38 | down | 0.6530 | -1.25 | down | 0.3770 | -1.42 | down | hypothetical protein\ Context:(NC_002946)-[1524870-1525526]\ Notes:Best Blastp Hit: emb CAB85298.1  (AL162758) hypothetical protein [Neisseria meningitidis]                                                                                                                                                                                          |

|         |        |       |      |        |        |      |        |       |      |                                                                                                                                                                                                                                                                                                                                                   |
|---------|--------|-------|------|--------|--------|------|--------|-------|------|---------------------------------------------------------------------------------------------------------------------------------------------------------------------------------------------------------------------------------------------------------------------------------------------------------------------------------------------------|
| NGO1552 | 0.0061 | -6.40 | down | 0.0131 | -7.50  | down | 0.0150 | -7.51 | down | putative sodium/proline symporter; proline permease\<br>Context:(NC_002946)+[1525688-1527205]\ Notes:Best<br>Blastp Hit: pir    G81202 sodium/proline symporter<br>NMB0402 [imported] - Neisseria meningitidis (group B<br>strain MD58; group A strain Z2491)<br>>gi 7225624 gb AAF40841.1  (AE002396)                                            |
| NGO1557 | 0.0730 | -5.62 | down | 0.1277 | -3.98  | down | 0.1401 | -2.95 | down | hypothetical protein\ Context:(NC_002946)+[1532654-<br>1532992]\ Notes:                                                                                                                                                                                                                                                                           |
| NGO1558 | 0.2022 | -2.87 | down | 0.0036 | -15.55 | down | 0.0776 | -4.75 | down | hypothetical protein\ Context:(NC_002946)-[1533130-<br>1533348]\ Notes:                                                                                                                                                                                                                                                                           |
| NGO1559 | 0.0333 | 4.07  | up   | 0.0789 | 3.01   | up   | 0.0097 | 3.95  | up   | hypothetical protein\ Context:(NC_002946)+[1533468-<br>1534145]\ Notes:Best Blastp Hit: gb AAC33455.1 <br>(AF067083) outer membrane protein homolog [Vitreoscilla<br>sp.] COG1360 Flagellar motor protein MotB                                                                                                                                    |
| NGO1560 | 0.0918 | 6.55  | up   | 0.2753 | -6.06  | down | 0.5017 | 3.65  | up   | hypothetical protein\ Context:(NC_002946)+[1534233-<br>1534379]\ Notes:                                                                                                                                                                                                                                                                           |
| NGO1561 | 0.0314 | -2.98 | down | 0.7226 | 1.12   | up   | 0.4858 | -1.46 | down | putative exodeoxyribonuclease III\ Context:(NC_002946)-<br>[1534419-1535189]\ Notes:Best Blastp Hit: pir    G81204<br>exodeoxyribonuclease III NMB0399 [imported] - Neisseria<br>meningitidis (group B strain MD58)<br>>gi 7225621 gb AAF40839.1  (AE002395)<br>exodeoxyribonuclease III [Neisseria meningitidis MC58]<br>COG0708 Exonuclease III |
| NGO1562 | 0.8586 | 1.14  | up   | 0.7227 | 1.24   | up   | 0.3649 | -1.45 | down | ArsR family transcriptional regulator\ Context:(NC_002946)-<br>[1535249-1535530]\ Notes:Best Blastp Hit:<br>gb AAF40838.1  (AE002395) transcriptional regulator; ArsR<br>family [Neisseria meningitidis MC58] COG0640 Predicted<br>transcriptional regulators                                                                                     |
| NGO1563 | 0.0343 | -3.68 | down | 0.0073 | -5.54  | down | 0.1930 | 1.94  | up   | hypothetical protein\ Context:(NC_002946)+[1535587-<br>1535772]\ Notes:                                                                                                                                                                                                                                                                           |
| NGO1564 | 0.4837 | 1.66  | up   | 0.1381 | -5.10  | down | 0.3042 | 1.73  | up   | hypothetical protein\ Context:(NC_002946)+[1535783-<br>1536034]\ Notes:                                                                                                                                                                                                                                                                           |

|         |        |      |    |        |       |      |        |       |      |                                                                                                                                                                                                                                                                                                                                                                                                                                                       |
|---------|--------|------|----|--------|-------|------|--------|-------|------|-------------------------------------------------------------------------------------------------------------------------------------------------------------------------------------------------------------------------------------------------------------------------------------------------------------------------------------------------------------------------------------------------------------------------------------------------------|
| NGO1565 | 0.0490 | 3.10 | up | 0.0452 | 3.21  | up   | 0.1369 | 1.66  | up   | putative nicotinate-nucleotide pyrophosphorylase\<br>Context:(NC_002946)-[1536265-1537146]\ Notes:Best<br>Blastp Hit: pir    A81780 nicotinate-nucleotide<br>pyrophosphorylase (carboxylating) (EC 2.4.2.19) NMA2088<br>[imported] - Neisseria meningitidis (group A strain Z2491)<br>>gi 7380713 emb CAB85304.1   (AL162758) nicotinate-<br>nucleotide pyrophosphorylase [Neisseria meningitidis]<br>COG0157 Nicotinate-nucleotide pyrophosphorylase |
| NGO1566 | 0.7770 | 1.12 | up | 0.6166 | 1.21  | up   | 0.7396 | 1.12  | up   | hypothetical protein\<br>Context:(NC_002946)-[1537222-<br>1538160]\ Notes:Best Blastp Hit: pir    C81204 conserved<br>hypothetical protein NMB0395 [imported] - Neisseria<br>meningitidis (group B strain MD58)<br>>gi 7225617 gb AAF40835.1   (AE002395) conserved<br>hypothetical protein [Neisseria meningitidis MC58]<br>COG1051 ADP-ribose pyrophosphatase                                                                                       |
| NGO1567 | 0.3752 | 1.52 | up | 0.3110 | -1.69 | down | 0.8306 | -1.05 | down | quinolinate synthetase\<br>Context:(NC_002946)+[1538362-<br>1539474]\ Notes:3 different subfamilies; catalyzes the<br>formation of quinolinate from iminoaspartate and<br>dihydroxyacetone phosphate                                                                                                                                                                                                                                                  |
| NGO1568 | 0.0954 | 2.39 | up | 0.2429 | 1.85  | up   | 0.0735 | 1.82  | up   | hypothetical protein\<br>Context:(NC_002946)+[1539526-<br>1541034]\ Notes:Best Blastp Hit: pir    H81203 l-aspartate<br>oxidase NMB0392 [imported] - Neisseria meningitidis<br>(group B strain MD58) >gi 7225614 gb AAF40832.1  <br>(AE002395) l-aspartate oxidase [Neisseria meningitidis<br>MC58] COG0029 Aspartate oxidase                                                                                                                         |
| NGO1573 | 0.0731 | 2.69 | up | 0.0913 | 7.93  | up   | 0.1588 | 1.71  | up   | putative ABC transporter ATP-binding protein\<br>Context:(NC_002946)+[1547577-1549253]\ Notes:ChvD; in<br>Agrobacterium tumefaciens; mutations in both Walker<br>boxes were found to affect virulence                                                                                                                                                                                                                                                 |

|         |        |        |      |        |        |      |        |       |      |                                                                                                                                                                                                                                                                                                                                                                                                                                                                                        |
|---------|--------|--------|------|--------|--------|------|--------|-------|------|----------------------------------------------------------------------------------------------------------------------------------------------------------------------------------------------------------------------------------------------------------------------------------------------------------------------------------------------------------------------------------------------------------------------------------------------------------------------------------------|
| NGO1574 | 0.7320 | 1.34   | up   | 0.3316 | 1.67   | up   | 0.6564 | -1.19 | down | hypothetical protein\ Context:(NC_002946)-[1549313-1549798]\ Notes:Best Blastp Hit: pir   G81205 phosphatidylglycerophosphatase (EC 3.1.3.27) A NMA2102 [imported] - Neisseria meningitidis (group B strain MD58; group A strain Z2491) >gi 7225607 gb AAF40826.1  (AE002394) phosphatidylglycerophosphatase A [Neisseria meningitidis MC58] >gi 7380727 emb CAB85318.1  (AL162758) phosphatidylglycerophosphatase A [Neisseria meningitidis] COG1267 Phosphatidylglycerophosphatase A |
| NGO1575 | 0.8907 | -1.07  | down | 0.1846 | -1.90  | down | 0.5109 | -1.23 | down | thiamine monophosphate kinase\ Context:(NC_002946)-[1549791-1550747]\ Notes:catalyzes the formation of thiamine diphosphate from thiamine phosphate ant ATP                                                                                                                                                                                                                                                                                                                            |
| NGO1576 | 0.0006 | -33.69 | down | 0.0026 | -19.49 | down | 0.0956 | -2.62 | down | hypothetical protein\ Context:(NC_002946)+[1551327-1551491]\ Notes:                                                                                                                                                                                                                                                                                                                                                                                                                    |
| NGO1577 | 0.2256 | 2.06   | up   | 0.5320 | 1.28   | up   | 0.6748 | 1.17  | up   | Omp3\ Context:(NC_002946)-[1551522-1552232]\ Notes:Best Blastp Hit: sp P07050 OMP3_NEIGO outer membrane protein P.III precursor (gonococcal protein III) (PIII) >gi 78109 pir A27894 outer membrane protein PIII precursor - Neisseria gonorrhoeae >gi 44890 emb CAA28752.1  (X05105) PIII (AA 1-236) [Neisseria gonorrhoeae] COG1360 Flagellar motor protein MotB                                                                                                                     |
| NGO1578 | 0.0391 | -2.98  | down | 0.2009 | -1.91  | down | 0.7461 | -1.20 | down | transcriptional regulator CysB-like protein\ Context:(NC_002946)+[1552596-1553546]\ Notes:Best Blastp Hit: pir   B81782 transcription regulator NMA2106 [imported] - Neisseria meningitidis (group A strain Z2491) >gi 7380730 emb CAB85321.1  (AL162758) transcriptional regulator [Neisseria meningitidis] COG0583 Transcriptional regulators; LysR family                                                                                                                           |
| NGO1579 | 0.8333 | 1.12   | up   | 0.9480 | -1.03  | down | 0.9633 | -1.01 | down | putative anaerobic transcriptional regulator\ Context:(NC_002946)-[1553659-1554393]\ Notes:Best Blastp Hit: gb AAF40820.1  (AE002394) transcriptional regulator; Crp/Fnr family [Neisseria meningitidis MC58] >gi 7380731 emb CAB85322.1  (AL162758) putative anaerobic transcriptional regulatory protein [Neisseria meningitidis] COG0664 cAMP-binding domains - Catabolite gene                                                                                                     |

|         |        |       |      |        |       |      |        |       |      |                                                                                                                                                                                                                                                                                                          |
|---------|--------|-------|------|--------|-------|------|--------|-------|------|----------------------------------------------------------------------------------------------------------------------------------------------------------------------------------------------------------------------------------------------------------------------------------------------------------|
| NGO1580 | 0.6879 | 1.31  | up   | 0.3262 | 1.94  | up   | 0.2294 | 1.62  | up   | coproporphyrinogen III oxidase\<br>Context:(NC_002946)+[1554528-1555949]\ Notes:catalyzes the oxygen-independent formation of protoporphyrinogen-IX from coproporphyrinogen-III                                                                                                                          |
| NGO1581 | 0.7213 | -1.25 | down | 0.7082 | -1.16 | down | 0.5348 | -1.35 | down | putative transport protein\<br>Context:(NC_002946)-[1556189-1557763]\ Notes:Best Blastp Hit: gb AAF40818.1  (AE002393) phosphate permease; putative [Neisseria meningitidis MC58] >gi 7380733 emb CAB85324.1  (AL162758) putative phosphate permease [Neisseria meningitidis] COG0306 Phosphate permease |
| NGO1582 | 0.4881 | -1.87 | down | 0.1006 | -4.09 | down | 0.7715 | 1.23  | up   | hypothetical protein\<br>Context:(NC_002946)+[1557793-1557990]\ Notes:                                                                                                                                                                                                                                   |
| NGO1583 | 0.6438 | -1.25 | down | 0.0166 | -4.94 | down | 0.1212 | -2.55 | down | anhydro-N-acetylmuramic acid kinase\<br>Context:(NC_002946)+[1558058-1559188]\ Notes:catalyzes hydrolysis of 1;6-anhydro bond of anhydro-N-acetylmuramic acid (anhMurNAc) and phosphorylates anhMurNAc to produce N-acetyl-muramate-6-phosphate; involved in murein recycling                            |
| NGO1585 | 0.9733 | -1.02 | down | 0.1044 | 3.08  | up   | 0.4332 | 1.78  | up   | MafB4\<br>Context:(NC_002946)+[1560252-1561982]\ Notes:Best Blastp Hit: pir H81782 adhesin MafB2 NMA2113 [imported] - Neisseria meningitidis (group A strain Z2491) >gi 7380736 emb CAB85327.1  (AL162758) adhesin MafB2 [Neisseria meningitidis]; putative MafB-like adhesin                            |
| NGO1586 | 0.2452 | 1.99  | up   | 0.1266 | 9.25  | up   | 0.4041 | 2.70  | up   | hypothetical protein\<br>Context:(NC_002946)+[1561960-1562241]\ Notes:Best Blastp Hit: emb CAB85330.1  (AL162758) hypothetical protein [Neisseria meningitidis]                                                                                                                                          |
| NGO1588 | 0.7378 | 1.24  | up   | 0.1340 | 1.74  | up   | 0.5773 | 1.40  | up   | hypothetical protein\<br>Context:(NC_002946)+[1562941-1563357]\ Notes:Best Blastp Hit: possibly phase variable - 8A residue homopolymer repeat in the coding sequence (ON)                                                                                                                               |
| NGO1589 | 0.5596 | -1.43 | down | 0.4529 | 1.40  | up   | 0.7507 | 1.12  | up   | hypothetical protein\<br>Context:(NC_002946)+[1563493-1564170]\ Notes:Best Blastp Hit: possibly an alternative C terminus for MafB                                                                                                                                                                       |

|         |        |       |      |        |       |      |        |       |      |                                                                                                                                                                                                                                                                                                                                                                                                                                        |
|---------|--------|-------|------|--------|-------|------|--------|-------|------|----------------------------------------------------------------------------------------------------------------------------------------------------------------------------------------------------------------------------------------------------------------------------------------------------------------------------------------------------------------------------------------------------------------------------------------|
| NGO1590 | 0.2830 | 1.94  | up   | 0.0755 | 6.24  | up   | 0.4607 | 1.57  | up   | hypothetical protein\ Context:(NC_002946)+[1564176-1564574]\ Notes:Best Blastp Hit: pir    A81207 hypothetical protein NMB0371 [imported] - Neisseria meningitidis (group B strain MD58) >gi 7225593 gb AAF40813.1  (AE002393) hypothetical protein [Neisseria meningitidis MC58]                                                                                                                                                      |
| NGO1591 | 0.2526 | 2.01  | up   | 0.0746 | 1.87  | up   | 0.5921 | 1.31  | up   | hypothetical protein\ Context:(NC_002946)+[1564605-1564982]\ Notes:Best Blastp Hit: pir    H81206 hypothetical protein NMB0370 [imported] - Neisseria meningitidis (group B strain MD58) >gi 7225592 gb AAF40812.1  (AE002393) hypothetical protein [Neisseria meningitidis MC58]                                                                                                                                                      |
| NGO1592 | 0.8487 | -1.09 | down | 0.4962 | 1.44  | up   | 0.5793 | 1.39  | up   | hypothetical protein\ Context:(NC_002946)+[1565113-1565850]\ Notes:Best Blastp Hit: possibly an alternative C terminus for MafB                                                                                                                                                                                                                                                                                                        |
| NGO1593 | 0.7823 | -1.19 | down | 0.1487 | 1.69  | up   | 0.7452 | 1.39  | up   | hypothetical protein\ Context:(NC_002946)+[1565922-1566266]\ Notes:Best Blastp Hit: pir    T29187 hypothetical protein C55C3.3 - Caenorhabditis elegans >gi 1255819 gb AAA96170.1  (U53335) weak similarity in one exon to C. reinhardtii kinesin-like protein 1 (PIR:A53953) and in another exon to Drosophila 150 kDa dynein-associated polypeptide (GLUED protein) (PIR:A53953) [Caenorhabditis elegans]                            |
| NGO1594 | 0.0976 | -2.93 | down | 0.0201 | -3.67 | down | 0.0607 | -2.81 | down | hypothetical protein\ Context:(NC_002946)+[1566514-1566786]\ Notes:                                                                                                                                                                                                                                                                                                                                                                    |
| NGO1595 | 0.3967 | 1.93  | up   | 0.4623 | 1.37  | up   | 0.4139 | -1.44 | down | hypothetical protein\ Context:(NC_002946)+[1566907-1567452]\ Notes:Best Blastp Hit: sp P45941 YQCF_BACSU hypothetical 21.5 KD protein in CWLA-CISA intergenic region >gi 7475297 pir   E69949 hypothetical protein yqCF - Bacillus subtilis >gi 1217878 dbj BAA06963.1  (D32216) ORF95 [Bacillus subtilis] >gi 1303771 dbj BAA12427.1  (D84432) YqcF [Bacillus subtilis] >gi 2635032 emb CAB14528.1  (Z99117) yqcF [Bacillus subtilis] |
| NGO1596 | 0.5728 | 1.57  | up   | 0.6051 | 1.32  | up   | 0.1816 | -2.81 | down | hypothetical protein\ Context:(NC_002946)+[1567856-1568257]\ Notes:Best Blastp Hit: pir    D81174 hypothetical protein NMB0659 [imported] - Neisseria meningitidis (group B strain MD58) >gi 7225885 gb AAF41078.1  (AE002420) hypothetical protein [Neisseria meningitidis MC58]                                                                                                                                                      |

|         |        |       |      |        |        |      |        |       |      |                                                                                                                                                                                                                                                                                                                                                                                                                                                            |
|---------|--------|-------|------|--------|--------|------|--------|-------|------|------------------------------------------------------------------------------------------------------------------------------------------------------------------------------------------------------------------------------------------------------------------------------------------------------------------------------------------------------------------------------------------------------------------------------------------------------------|
| NGO1597 | 0.6259 | -1.56 | down | 0.0550 | -7.92  | down | 0.7977 | -1.18 | down | hypothetical protein\ Context:(NC_002946)-[1568599-1570263]\ Notes:                                                                                                                                                                                                                                                                                                                                                                                        |
| NGO1598 | 0.3730 | 1.84  | up   | 0.5316 | -1.37  | down | 0.1544 | -1.98 | down | hypothetical protein\ Context:(NC_002946)-[1570369-1570644]\ Notes:Best Blastp Hit: gb AAC44904.1  (U82701) [Neisseria gonorrhoeae]                                                                                                                                                                                                                                                                                                                        |
| NGO1599 | 0.0290 | -4.66 | down | 0.0090 | -8.00  | down | 0.2351 | -3.79 | down | AmpG\ Context:(NC_002946)-[1570641-1571924]\ Notes:Best Blastp Hit: possibly phase variable - 8T residue homopolymer repeat in the coding sequence (ON) COG0477 Permeases; putative signal transducer protein                                                                                                                                                                                                                                              |
| NGO1600 | 0.3902 | -1.54 | down | 0.1776 | -1.85  | down | 0.4508 | -1.29 | down | hypothetical protein\ Context:(NC_002946)-[1572073-1573491]\ Notes:Best Blastp Hit: gb AAC44901.1  (U82700) glutamine synthetase [Neisseria gonorrhoeae] COG0174 Glutamine synthase                                                                                                                                                                                                                                                                        |
| NGO1601 | 0.6296 | -1.37 | down | 0.0050 | -23.64 | down | 0.3542 | -2.23 | down | hypothetical protein\ Context:(NC_002946)+[1572106-1573584]\ Notes:Best Blastp Hit: gb AAB61771.1  (M84113) ORF1 [Neisseria gonorrhoeae]                                                                                                                                                                                                                                                                                                                   |
| NGO1602 | 0.1986 | -2.34 | down | 0.0032 | -4.82  | down | 0.5716 | -1.30 | down | putative shikimate dehydrogenase\ Context:(NC_002946)+[1573802-1574611]\ Notes:Best Blastp Hit: gb AAC44913.1  (U82842) shikimate dehydrogenase [Neisseria gonorrhoeae] COG0169 Shikimate 5-dehydrogenase                                                                                                                                                                                                                                                  |
| NGO1603 | 0.0310 | -5.00 | down | 0.0044 | -7.05  | down | 0.8925 | 1.09  | up   | monofunctional peptidoglycan transglycosylase\ Context:(NC_002946)+[1574614-1575315]\ Notes:Best Blastp Hit: sp Q51005 MTGA_NEIGO monofunctional biosynthetic peptidoglycan transglycosylase (monofunctional TGASE) >gi 1196663 gb AAB37748.1  (L47159) peptidoglycan transglycosylase [Neisseria gonorrhoeae] >gi 1778807 gb AAC44899.1  (U82700) monofunctional peptidoglycan transglycosylase [Neisseria gonorrhoeae] COG0744 Membrane carboxypeptidase |
| NGO1604 | 0.7427 | 1.27  | up   | 0.0004 | -13.89 | down | 0.9076 | -1.11 | down | hypothetical protein\ Context:(NC_002946)+[1575327-1575569]\ Notes:Best Blastp Hit: pir   G81933 hypothetical protein NMA0876 [imported] - Neisseria meningitidis (group A strain Z2491) >gi 7379591 emb CAB84156.1  (AL162754) hypothetical protein NMA0876 [Neisseria meningitidis]                                                                                                                                                                      |

|         |        |      |    |        |       |      |        |       |      |                                                                                                                                                                                                                                                                                                                                                                                                                                                                         |
|---------|--------|------|----|--------|-------|------|--------|-------|------|-------------------------------------------------------------------------------------------------------------------------------------------------------------------------------------------------------------------------------------------------------------------------------------------------------------------------------------------------------------------------------------------------------------------------------------------------------------------------|
| NGO1605 | 0.2722 | 2.07 | up | 0.9873 | 1.01  | up   | 0.7844 | -1.09 | down | putative ABC transporter; ATP-binding protein\<br>Context:(NC_002946)-[1575855-1576589]\ Notes:Best Blastp Hit: emb CAB85343.1  (AL162758) putative ABC transporter ATP-binding protein [Neisseria meningitidis] COG1137 ABC-type (unclassified) transport system                                                                                                                                                                                                       |
| NGO1606 | 0.2173 | 1.92 | up | 0.6902 | 1.15  | up   | 0.3524 | 1.27  | up   | hypothetical protein\<br>Context:(NC_002946)-[1576660-1577190]\ Notes:Best Blastp Hit: pir    B81208 conserved hypothetical protein NMB0355 [imported] - Neisseria meningitidis (group B strain MD58; group A strain Z2491) >gi 7225577 gb AAF40798.1  (AE002392) conserved hypothetical protein [Neisseria meningitidis MC58] >gi 7380753 emb CAB85344.1  (AL162758) putative outer membrane hypothetical protein [Neisseria meningitidis] COG1934 Uncharacterized BCR |
| NGO1607 | 0.4442 | 1.45 | up | 0.9631 | -1.02 | down | 0.4847 | -1.22 | down | hypothetical protein\<br>Context:(NC_002946)-[1577171-1577752]\ Notes:Best Blastp Hit: pir    A81208 hypothetical protein NMB0354 [imported] - Neisseria meningitidis (group B strain MD58) >gi 7225576 gb AAF40797.1  (AE002392) hypothetical protein [Neisseria meningitidis MC58]                                                                                                                                                                                    |
| NGO1608 | 0.5150 | 1.39 | up | 0.1374 | 1.90  | up   | 0.5949 | 1.16  | up   | hypothetical protein\<br>Context:(NC_002946)-[1577749-1578312]\ Notes:Best Blastp Hit: pir    C81785 conserved hypothetical protein NMA2134 [imported] - Neisseria meningitidis (group A strain Z2491) >gi 7380755 emb CAB85346.1  (AL162758) conserved hypothetical protein [Neisseria meningitidis] COG1778 Uncharacterized proteins of HAD                                                                                                                           |
| NGO1609 | 0.4010 | 1.44 | up | 0.0735 | -2.04 | down | 0.7536 | -1.11 | down | KpsF\<br>Context:(NC_002946)-[1578351-1579406]\ Notes:Best Blastp Hit: pir    D81785 conserved hypothetical protein NMA2135 [imported] - Neisseria meningitidis (group A strain Z2491) >gi 7380756 emb CAB85347.1  (AL162758) conserved hypothetical protein [Neisseria meningitidis] COG0794 Predicted sugar phosphate aminotransferases; putative polysialic acid capsule expression protein                                                                          |



|         |        |       |      |        |       |      |        |       |      |                                                                                                                                                                                                                                                                                                                                                                                                                                         |
|---------|--------|-------|------|--------|-------|------|--------|-------|------|-----------------------------------------------------------------------------------------------------------------------------------------------------------------------------------------------------------------------------------------------------------------------------------------------------------------------------------------------------------------------------------------------------------------------------------------|
| NGO1610 | 0.3427 | 1.68  | up   | 0.7630 | 1.13  | up   | 0.2849 | 1.40  | up   | transaldolase\ Context:(NC_002946)+[1579422-1580477]\ Notes:catalyzes the reversible formation of D-erythrose 4-phosphate and D-fructose 6-phosphate from sedoheptulose 7-phosphate and D-glyceraldehyde 3-phosphate                                                                                                                                                                                                                    |
| NGO1611 | 0.5647 | -1.33 | down | 0.0942 | -2.12 | down | 0.3378 | -1.58 | down | glutamyl-Q tRNA(Asp) synthetase\ Context:(NC_002946)+[1580935-1581822]\ Notes:this tRNA synthetase lacks the tRNA anticodon interaction domain; instead this enzyme modifies tRNA(Asp) with glutamate by esterifying glutamate to the 2-amino-5-(4;5-dihydroxy-2-cyclopenten-1-yl) moiety of queosine generating a modified nucleoside at the first anticodon position of tRNAAsp; the modified tRNA does not bind elongation factor Tu |
| NGO1612 | 0.0762 | -2.38 | down | 0.0986 | -2.60 | down | 0.1545 | -1.77 | down | tRNA-dihydrouridine synthase A\ Context:(NC_002946)-[1581892-1582938]\ Notes:Best Blastp Hit: pir    H81785 conserved hypothetical protein NMA2139 [imported] - Neisseria meningitidis (group A strain Z2491) >gi 7380760 emb CAB85351.1  (AL162758) conserved hypothetical protein [Neisseria meningitidis] COG0042 Predicted TIM-barrel enzymes; possibly                                                                             |
| NGO1613 | 0.3444 | -1.53 | down | 0.0551 | -2.88 | down | 0.0713 | -2.04 | down | putative integrase/recombinase; putative phage associated protein\ Context:(NC_002946)+[1583028-1584182]\ Notes:Best Blastp Hit: emb CAB96965.1  (AJ251482) hypothetical protein [Pseudomonas syringae pv. pisi]                                                                                                                                                                                                                        |
| NGO1614 | 0.5554 | 1.53  | up   | 0.1012 | -7.24 | down | 0.6888 | -1.22 | down | putative phage associated protein\ Context:(NC_002946)-[1584232-1584498]\ Notes:                                                                                                                                                                                                                                                                                                                                                        |
| NGO1615 | 0.0355 | -3.47 | down | 0.0191 | -8.77 | down | 0.2521 | -1.91 | down | putative phage associated protein\ Context:(NC_002946)-[1584606-1585754]\ Notes:Best Blastp Hit: pir    I41051 hsdM protein - Escherichia coli >gi 450688 emb CAA53205.1  (X75452) hsdM gene of Ecopr1 [Escherichia coli]                                                                                                                                                                                                               |
| NGO1620 | 0.7528 | 1.14  | up   | 0.6143 | 1.22  | up   | 0.6867 | -1.37 | down | putative phage associated protein\ Context:(NC_002946)-[1587922-1588425]\ Notes:Best Blastp Hit: emb CAB63672.1  (AJ251789) hypothetical protein [Lactobacillus casei bacteriophage A2]                                                                                                                                                                                                                                                 |
| NGO1622 | 0.2594 | -2.17 | down | 0.3089 | -1.84 | down | 0.4779 | -1.58 | down | putative phage associated protein\ Context:(NC_002946)-[1588835-1589110]\ Notes:Best Blastp Hit: gb AAF41312.1  (AE002442) hypothetical protein [Neisseria meningitidis MC58]                                                                                                                                                                                                                                                           |

|         |        |       |      |        |       |      |        |       |      |                                                                                                                                                                                                                                                                                                                                                                                                                                                                                                 |
|---------|--------|-------|------|--------|-------|------|--------|-------|------|-------------------------------------------------------------------------------------------------------------------------------------------------------------------------------------------------------------------------------------------------------------------------------------------------------------------------------------------------------------------------------------------------------------------------------------------------------------------------------------------------|
| NGO1623 | 0.8993 | -1.07 | down | 0.9972 | -1.00 | down | 0.8043 | -1.49 | down | putative phage associated protein\ Context:(NC_002946)-[1589263-1589550]\ Notes:                                                                                                                                                                                                                                                                                                                                                                                                                |
| NGO1624 | 0.7336 | 1.26  | up   | 0.8061 | 1.30  | up   | 0.2655 | -2.19 | down | putative phage associated protein\ Context:(NC_002946)-[1589736-1589936]\ Notes:                                                                                                                                                                                                                                                                                                                                                                                                                |
| NGO1625 | 0.8454 | 1.13  | up   | 0.9121 | 1.06  | up   | 0.7772 | -1.15 | down | putative phage associated protein\ Context:(NC_002946)-[1590177-1590593]\ Notes:                                                                                                                                                                                                                                                                                                                                                                                                                |
| NGO1626 | 0.3147 | 1.75  | up   | 0.4384 | 1.37  | up   | 0.6203 | 1.19  | up   | putative phage associated protein\ Context:(NC_002946)-[1590602-1591249]\ Notes:Best Blastp Hit: gb AAF30438.1 AE002103_3 (AE002103) hypothetical [Ureaplasma urealyticum]                                                                                                                                                                                                                                                                                                                      |
| NGO1627 | 0.6815 | 1.27  | up   | 0.7271 | -1.18 | down | 0.4739 | -1.33 | down | putative phage associated protein\ Context:(NC_002946)-[1591369-1591770]\ Notes:Best Blastp Hit: gi 9628618 orf14 [Bacteriophage HP1] >gi 1730858 sp P51716 YO14_BPHP1 hypothetical 14.9 KD protein in REP-HOL intergenic region (ORF14) >gi 2120197 pir S69520 hypothetical protein 14 - phage HP1 >gi 1046241 gb AAB09199.1  (U24159) orf14 [Bacteriophage HP1]                                                                                                                               |
| NGO1628 | 0.4279 | 1.63  | up   | 0.8316 | 1.09  | up   | 0.7828 | -1.12 | down | putative phage associated protein\ Context:(NC_002946)-[1591873-1592055]\ Notes:Best Blastp Hit: pir S75025 hypothetical protein slr1999 - Synechocystis sp. (strain PCC 6803) >gi 1652970 dbj BAA17887.1  (D90910) hypothetical protein [Synechocystis sp.] COG1598 Uncharacterized ACR                                                                                                                                                                                                        |
| NGO1629 | 0.0405 | -8.29 | down | 0.0501 | -3.91 | down | 0.1614 | -4.06 | down | putative phage associated protein\ Context:(NC_002946)-[1592225-1593043]\ Notes:                                                                                                                                                                                                                                                                                                                                                                                                                |
| NGO1630 | 0.0866 | -4.27 | down | 0.0357 | -5.97 | down | 0.0128 | -7.46 | down | putative phage repressor protein; putative phage associated protein\ Context:(NC_002946)-[1593316-1594071]\ Notes:Best Blastp Hit: pdb 1LLI B Chain B; Lambda Repressor Mutant With Val 36 Replaced By Leu; Met 40 Replaced By Leu; And Val 47 Replaced By Ile (V36I;M40I;V47I) Complexed With Dna Operator >gi 640244 pdb 1LLI A Chain A; Lambda Repressor Mutant With Val 36 Replaced By Leu; Met 40 Replaced By Leu; And Val 47 Replaced By Ile (V36I;M40I;V47I) Complexed With Dna Operator |
| NGO1632 | 0.2661 | 1.76  | up   | 0.4228 | 1.40  | up   | 0.4556 | 1.23  | up   | putative phage associated protein\ Context:(NC_002946)-[1594614-1594802]\ Notes:                                                                                                                                                                                                                                                                                                                                                                                                                |
| NGO1633 | 0.6766 | 1.54  | up   | 0.5794 | -1.59 | down | 0.0476 | -5.20 | down | putative phage associated protein\ Context:(NC_002946)+[1594975-1595202]\ Notes:                                                                                                                                                                                                                                                                                                                                                                                                                |

|         |        |        |      |        |        |      |        |       |      |                                                                                                                                                                                                                                                                                                                                                                                                                                         |
|---------|--------|--------|------|--------|--------|------|--------|-------|------|-----------------------------------------------------------------------------------------------------------------------------------------------------------------------------------------------------------------------------------------------------------------------------------------------------------------------------------------------------------------------------------------------------------------------------------------|
| NGO1634 | 0.0908 | -3.58  | down | 0.0096 | -17.88 | down | 0.5415 | -2.00 | down | putative phage associated protein\<br>Context:(NC_002946)+[1595199-1595750]\ Notes:Best Blastp Hit: pir   S30432 hypothetical protein - Streptomyces clavuligerus plasmid pSCL                                                                                                                                                                                                                                                          |
| NGO1635 | 0.0644 | -15.78 | down | 0.0225 | -13.90 | down | 0.3927 | -2.71 | down | putative phage associated protein\<br>Context:(NC_002946)+[1596026-1596241]\ Notes:                                                                                                                                                                                                                                                                                                                                                     |
| NGO1636 | 0.1274 | -2.81  | down | 0.0265 | -5.21  | down | 0.3036 | -1.67 | down | putative DNA replication protein; putative phage associated protein\<br>Context:(NC_002946)+[1596419-1597036]\ Notes:Best Blastp Hit: pir   T03011 dnaC protein homolog - Salmonella typhimurium >gi 3294483 gb AAC26072.1  (AF001386) unknown [Salmonella typhimurium] COG1484 DNA replication protein DnaC                                                                                                                            |
| NGO1637 | 0.0086 | 153.59 | up   | 0.7522 | -2.00  | down | 0.8858 | -1.09 | down | putative phage associated protein\<br>Context:(NC_002946)+[1597106-1597261]\ Notes:                                                                                                                                                                                                                                                                                                                                                     |
| NGO1638 | 0.4481 | 1.55   | up   | 0.3622 | -2.67  | down | 0.4499 | -1.87 | down | putative phage associated protein\<br>Context:(NC_002946)+[1597352-1597846]\ Notes:                                                                                                                                                                                                                                                                                                                                                     |
| NGO1639 | 0.3021 | 2.76   | up   | 0.4765 | -2.28  | down | 0.7714 | 1.21  | up   | putative phage associated protein\<br>Context:(NC_002946)-[1597884-1598387]\ Notes:Best Blastp Hit: gb AAF41506.1  (AE002461) hypothetical protein [Neisseria meningitidis MC58]                                                                                                                                                                                                                                                        |
| NGO1640 | 0.2875 | 2.54   | up   | 0.0461 | -4.90  | down | 0.2975 | -1.50 | down | putative phage associated protein\<br>Context:(NC_002946)+[1598474-1599049]\ Notes:Best Blastp Hit: sp Q37873 RUSA_BP82 crossover junction endodeoxyribonuclease RusA (Holliday junction nuclease RuSA) (Holliday junction resolvase) >gi 2120247 pir   S66583 crossover junction endodeoxyribonuclease (EC 3.1.22.4) rusA - phage 82 >gi 1051116 emb CAA63330.1  (X92588) Can suppress the phenotype of ruv mutants [Bacteriophage 82] |
| NGO1641 | 0.3560 | 1.59   | up   | 0.3132 | 1.55   | up   | 0.3607 | 1.29  | up   | putative invertase related gene 6 (Irg6); putative phage associated protein\<br>Context:(NC_002946)-[1599378-1600340]\ Notes:Best Blastp Hit: gb AAC82509.1  (U65994) pilin gene inverting protein homolog PivNG [Neisseria gonorrhoeae]                                                                                                                                                                                                |

|         |        |       |      |        |        |      |        |       |      |                                                                                                                                                                                                                                                                                                                                                                                                                                                                                          |
|---------|--------|-------|------|--------|--------|------|--------|-------|------|------------------------------------------------------------------------------------------------------------------------------------------------------------------------------------------------------------------------------------------------------------------------------------------------------------------------------------------------------------------------------------------------------------------------------------------------------------------------------------------|
| NGO1642 | 0.1125 | -2.77 | down | 0.2738 | -1.59  | down | 0.0334 | -5.09 | down | putative phage associated protein\ Context:(NC_002946)-[1600891-1601214]\ Notes:Best Blastp Hit: sp Q09256 YQB3_CAEEEL hypothetical 16.6 KD protein C30G12.3 in chromosome II >gi 7496734 pir  T15714 hypothetical protein C30G12.3 - Caenorhabditis elegans >gi 687835 gb AAC46672.1  (U21319) C30G12.3 gene product [Caenorhabditis elegans]                                                                                                                                           |
| NGO1646 | 0.6573 | 1.34  | up   | 0.1089 | -5.92  | down | 0.2459 | 2.45  | up   | putative phage associated protein\ Context:(NC_002946)+[1603894-1604178]\ Notes:Best Blastp Hit: emb CAB85024.1  (AL162757) putative integral membrane protein [Neisseria meningitidis]                                                                                                                                                                                                                                                                                                  |
| NGO1647 | 0.0528 | -4.01 | down | 0.1458 | -4.59  | down | 0.5717 | -1.45 | down | putative phage associated protein\ Context:(NC_002946)+[1604179-1605366]\ Notes:Best Blastp Hit: emb CAB85025.1  (AL162757) hypothetical protein [Neisseria meningitidis]                                                                                                                                                                                                                                                                                                                |
| NGO1648 | 0.0195 | -6.06 | down | 0.0099 | -17.25 | down | 0.2021 | -3.49 | down | lrg7\ Context:(NC_002946)+[1605581-1606537]\ Notes:Best Blastp Hit: pir E81070 pilin gene inverting protein PivNM-1A NMB1552;NMB1625 [imported] - Neisseria meningitidis (group B strain MD58) >gi 7226799 gb AAF41907.1  (AE002505) pilin gene inverting protein PivNM-1A [Neisseria meningitidis MC58] >gi 7226876 gb AAF41976.1  (AE002513) pilin gene inverting protein PivNM-1B [Neisseria meningitidis MC58]; putative invertase related gene 7; putative phage associated protein |
| NGO1649 | 0.0803 | -2.34 | down | 0.0716 | -4.86  | down | 0.5481 | -1.34 | down | putative phage associated protein\ Context:(NC_002946)+[1606828-1607367]\ Notes:                                                                                                                                                                                                                                                                                                                                                                                                         |
| NGO1651 | 0.1579 | 2.15  | up   | 0.0962 | 3.44   | up   | 0.5653 | 1.18  | up   | putative phage associated protein\ Context:(NC_002946)+[1608229-1608609]\ Notes:Best Blastp Hit: gb AAF41305.1  (AE002442) hypothetical protein [Neisseria meningitidis MC58]                                                                                                                                                                                                                                                                                                            |
| NGO1652 | 0.8229 | 1.11  | up   | 0.6198 | -1.25  | down | 0.3067 | -2.26 | down | putative phage associated protein\ Context:(NC_002946)-[1608810-1609808]\ Notes:Best Blastp Hit: pir A81144 hypothetical protein NMB0900 [imported] - Neisseria meningitidis (group B strain MD58) >gi 7226137 gb AAF41308.1  (AE002442) hypothetical protein [Neisseria meningitidis MC58]                                                                                                                                                                                              |

|         |        |        |      |        |       |      |        |       |      |                                                                                                                                                                                                                                                                                                                                    |
|---------|--------|--------|------|--------|-------|------|--------|-------|------|------------------------------------------------------------------------------------------------------------------------------------------------------------------------------------------------------------------------------------------------------------------------------------------------------------------------------------|
| NGO1653 | 0.0146 | -15.54 | down | 0.2437 | -4.38 | down | 0.2740 | -5.58 | down | hypothetical protein\ Context:(NC_002946)-[1610151-1610327]\ Notes:Best Blastp Hit: emb CAB84546.1  (AL162755) hypothetical protein NMA1294 [Neisseria meningitidis]                                                                                                                                                               |
| NGO1654 | 0.7668 | 1.16   | up   | 0.8012 | -1.14 | down | 0.8487 | -1.06 | down | D-tyrosyl-tRNA deacylase\ Context:(NC_002946)-[1610655-1611146]\ Notes:Hydrolyzes D-tyrosyl-tRNA(Tyr) into D-tyrosine and free tRNA(Tyr). Could be a defense mechanism against a harmful effect of D-tyrosine                                                                                                                      |
| NGO1655 | 0.1087 | 2.52   | up   | 0.2005 | 1.73  | up   | 0.2783 | 1.43  | up   | hypothetical protein\ Context:(NC_002946)-[1611220-1611978]\ Notes:Best Blastp Hit: pir   B81786 hypothetical protein NMA2141 [imported] - Neisseria meningitidis (group A strain Z2491) >gi 7380762 emb CAB85353.1  (AL162758) hypothetical protein [Neisseria meningitidis] COG0760 Parvulin-like peptidyl-prolyl isomerase      |
| NGO1656 | 0.1807 | 2.23   | up   | 0.2086 | 1.56  | up   | 0.3160 | 1.51  | up   | hypothetical protein\ Context:(NC_002946)-[1612048-1612914]\ Notes:Best Blastp Hit: gb AAF40788.1  (AE002391) cell-binding factor; putative [Neisseria meningitidis MC58] >gi 7380763 emb CAB85354.1  (AL162758) putative periplasmi hypothetical protein [Neisseria meningitidis] COG0760 Parvulin-like peptidyl-prolyl isomerase |
| NGO1657 | 0.2198 | 2.05   | up   | 0.2439 | 1.49  | up   | 0.5417 | 1.23  | up   | hypothetical protein\ Context:(NC_002946)-[1612963-1613241]\ Notes:Best Blastp Hit: gb AAF40787.1  (AE002391) BolA/YrbA family protein [Neisseria meningitidis MC58] COG0271 Stress-induced morphogen BolA (activity)                                                                                                              |
| NGO1658 | 0.3798 | 1.59   | up   | 0.5335 | 1.27  | up   | 0.7726 | 1.10  | up   | Ycil-like protein\ Context:(NC_002946)-[1613241-1613531]\ Notes:unknown function; Ycil from Haemophilus influenzae presents crystal structure similarity to a muconolactone isomerase; but does not seem to catalyze any of the predicted reactions based on sequence and structure similarity                                     |

|         |        |       |      |        |        |      |        |       |      |                                                                                                                                                                                                                                                                                                                                                                                                                    |
|---------|--------|-------|------|--------|--------|------|--------|-------|------|--------------------------------------------------------------------------------------------------------------------------------------------------------------------------------------------------------------------------------------------------------------------------------------------------------------------------------------------------------------------------------------------------------------------|
| NGO1659 | 0.3681 | 1.57  | up   | 0.8695 | 1.07   | up   | 0.9436 | -1.02 | down | hypothetical protein\ Context:(NC_002946)-[1613534-1614064]\ Notes:Best Blastp Hit: pir D81209 intracellular septation protein A NMB0342 [imported] - Neisseria meningitidis (group B strain MD58; group A strain Z2491) >gi 7225563 gb AAF40785.1  (AE002391) intracellular septation protein A [Neisseria meningitidis MC58] >gi 7380766 emb CAB85357.1  (AL162758) putative morphogene [Neisseria meningitidis] |
| NGO1662 | 0.7673 | -1.15 | down | 0.5834 | -1.29  | down | 0.6630 | -1.14 | down | hypothetical protein\ Context:(NC_002946)-[1617306-1618475]\ Notes:Best Blastp Hit: gb AAF40782.1  (AE002390) conserved hypothetical protein [Neisseria meningitidis MC58]                                                                                                                                                                                                                                         |
| NGO1663 | 0.7959 | -1.14 | down | 0.3003 | -1.61  | down | 0.5127 | -1.20 | down | hypothetical protein\ Context:(NC_002946)-[1618486-1618800]\ Notes:Best Blastp Hit: emb CAB85361.1  (AL162758) putative inner membrane hypothetical protein [Neisseria meningitidis]                                                                                                                                                                                                                               |
| NGO1664 | 0.0633 | -4.05 | down | 0.0102 | -14.60 | down | 0.1968 | -1.58 | down | hypothetical protein\ Context:(NC_002946)+[1618903-1619079]\ Notes:Best Blastp Hit: emb CAB85362.1  (AL162758) hypothetical protein [Neisseria meningitidis]                                                                                                                                                                                                                                                       |
| NGO1665 | 0.6572 | -1.27 | down | 0.1812 | -1.78  | down | 0.0800 | -1.65 | down | branched-chain amino acid aminotransferase\ Context:(NC_002946)+[1619110-1620108]\ Notes:catalyzes the transamination of the branched-chain amino acids to their respective alpha-keto acids                                                                                                                                                                                                                       |
| NGO1666 | 0.1305 | 2.22  | up   | 0.0982 | 2.10   | up   | 0.3569 | 1.30  | up   | enoyl-(acyl carrier protein) reductase\ Context:(NC_002946)-[1620353-1621138]\ Notes:Catalyzes a key regulatory step in fatty acid biosynthesis                                                                                                                                                                                                                                                                    |
| NGO1667 | 0.0677 | 2.70  | up   | 0.0700 | 1.94   | up   | 0.1560 | 1.66  | up   | 2;3;4;5-tetrahydropyridine-2-carboxylateN-succinyltransferase\ Context:(NC_002946)-[1621293-1622114]\ Notes:catalyzes the formation of N-succinyl-2-amino-6-ketopimelate from succinyl-CoA and tetrahydrodipicolinate in the lysine biosynthetic pathway                                                                                                                                                           |

|         |        |       |      |        |        |      |        |       |      |                                                                                                                                                                                                                                                                                                                                                                     |
|---------|--------|-------|------|--------|--------|------|--------|-------|------|---------------------------------------------------------------------------------------------------------------------------------------------------------------------------------------------------------------------------------------------------------------------------------------------------------------------------------------------------------------------|
| NGO1668 | 0.3156 | -2.35 | down | 0.0165 | -18.01 | down | 0.3507 | -2.91 | down | glucose-6-phosphate isomerase\ Context:(NC_002946)-[1622324-1623967]\ Notes:Best Blastp Hit: pir    G81787 glucose-6-phosphate isomerase (EC 5.3.1.9) 2 NMA2154 [imported] - Neisseria meningitidis (group A strain Z2491) >gi 7380775 emb CAB85366.1  (AL162758) glucose-6-phosphate isomerase 2 [Neisseria meningitidis] COG0166<br>Glucose-6-phosphate isomerase |
| NGO1669 | 0.5777 | 1.36  | up   | 0.8359 | 1.08   | up   | 0.5935 | 1.19  | up   | PilG\ Context:(NC_002946)+[1624476-1625708]\ Notes:Best Blastp Hit: pir    S77585 pilus assembly protein pilG - Neisseria gonorrhoeae >gi 639480 gb AAC43469.1  (U32588) PilG [Neisseria gonorrhoeae] COG1459 General secretion pathway protein F                                                                                                                   |
| NGO1670 | 0.2587 | 2.21  | up   | 0.2787 | 2.19   | up   | 0.7022 | 1.14  | up   | PilD\ Context:(NC_002946)+[1625782-1626642]\ Notes:Best Blastp Hit: sp P33566 LEP4_NEIGO type 4 prepilin-like proteins leader peptide processing enzyme [includes: leader peptidase (prepilin peptidase); N-methyltransferase ] >gi 996088 gb AAC43468.1  (U32588) PilD [Neisseria gonorrhoeae] COG1989 Signal peptidase HopD; cleaves; type IV prepilin peptidase  |
| NGO1671 | 0.3861 | -1.99 | down | 0.5482 | -1.36  | down | 0.7157 | -1.34 | down | hypothetical protein\ Context:(NC_002946)+[1626600-1627271]\ Notes:Best Blastp Hit: pir    S77586 hypothetical protein X - Neisseria gonorrhoeae >gi 996087 gb AAC43467.1  (U32588) OrfX [Neisseria gonorrhoeae] COG0237 Predicted ATPase                                                                                                                           |
| NGO1672 | 0.0348 | -9.42 | down | 0.0194 | -24.20 | down | 0.8285 | -1.53 | down | hypothetical protein\ Context:(NC_002946)+[1627156-1627473]\ Notes:Best Blastp Hit: pir    S77587 hypothetical protein Y - Neisseria gonorrhoeae >gi 996086 gb AAC43466.1  (U32588) ORFY; non-essential for pilus assembly; [Neisseria gonorrhoeae]                                                                                                                 |
| NGO1673 | 0.1765 | 2.08  | up   | 0.5176 | 1.28   | up   | 0.7575 | 1.11  | up   | PilF\ Context:(NC_002946)-[1627559-1629235]\ Notes:Best Blastp Hit: sp P37094 PILF_NEIGO type IV pilus assembly protein PilF >gi 420911 pir   S32914 pilF protein - Neisseria gonorrhoeae >gi 996085 gb AAC43465.1  (U32588) PilF [Neisseria gonorrhoeae] COG0630 Predicted ATPases involved in pili                                                                |

|         |        |       |      |        |       |      |        |       |      |                                                                                                                                                                                                                                                                                                                                                                                                                                                     |
|---------|--------|-------|------|--------|-------|------|--------|-------|------|-----------------------------------------------------------------------------------------------------------------------------------------------------------------------------------------------------------------------------------------------------------------------------------------------------------------------------------------------------------------------------------------------------------------------------------------------------|
| NGO1674 | 0.1581 | -1.92 | down | 0.1806 | -1.96 | down | 0.2436 | -1.39 | down | hypothetical protein\ Context:(NC_002946)-[1629573-1630019]\ Notes:Best Blastp Hit: pir   E81788 conserved hypothetical protein NMA2160 [imported] - Neisseria meningitidis (group A strain Z2491)<br>>gi 7380781 emb CAB85372.1  (AL162758) conserved hypothetical protein [Neisseria meningitidis]                                                                                                                                                |
| NGO1675 | 0.2289 | 1.99  | up   | 0.5953 | 1.19  | up   | 0.2980 | -1.32 | down | IspB\ Context:(NC_002946)-[1630023-1630997]\ Notes:Best Blastp Hit: pir   A81213 octaprenyl-diphosphate synthase (EC 2.5.1.-) NMA2161 [imported] - Neisseria meningitidis (group B strain MD58; group A strain Z2491)<br>>gi 7225547 gb AAF40771.1  (AE002389) octaprenyl-diphosphate synthase [Neisseria meningitidis MC58]<br>>gi 7380782 emb CAB85373.1  (AL162758) octaprenyl-diphosphate synthase                                              |
| NGO1676 | 0.1252 | 2.81  | up   | 0.4998 | 1.29  | up   | 0.4868 | 1.32  | up   | 50S ribosomal protein L21\ Context:(NC_002946)+[1631221-1631529]\ Notes:Best Blastp Hit: pir   H81212 50S ribosomal protein L21 NMB0325 [imported] - Neisseria meningitidis (group B strain MD58; group A strain Z2491)<br>>gi 7225546 gb AAF40770.1  (AE002389) 50S ribosomal protein L21 [Neisseria meningitidis MC58]<br>>gi 7380783 emb CAB85374.1  (AL162758) 50S ribosomal protein L21 [Neisseria meningitidis] COG0261 Ribosomal protein L21 |
| NGO1677 | 0.1359 | 2.52  | up   | 0.4016 | 1.40  | up   | 0.5413 | 1.21  | up   | 50S ribosomal protein L27\ Context:(NC_002946)+[1631554-1631826]\ Notes:involved in the peptidyltransferase reaction during translation                                                                                                                                                                                                                                                                                                             |
| NGO1678 | 0.0583 | 3.35  | up   | 0.0228 | 3.13  | up   | 0.1128 | 2.11  | up   | hypothetical protein\ Context:(NC_002946)+[1632061-1633245]\ Notes:Best Blastp Hit: emb CAB85376.1  (AL162758) putative monooxygenase [Neisseria meningitidis] COG0654 2-Octaprenyl-6-metoxyphenol hydroxylase                                                                                                                                                                                                                                      |



|         |        |       |      |        |       |      |        |       |      |                                                                                                                                                                                                                                                                                                                                                                                                                                                                                             |
|---------|--------|-------|------|--------|-------|------|--------|-------|------|---------------------------------------------------------------------------------------------------------------------------------------------------------------------------------------------------------------------------------------------------------------------------------------------------------------------------------------------------------------------------------------------------------------------------------------------------------------------------------------------|
| NGO1679 | 0.3825 | 1.72  | up   | 0.8906 | 1.06  | up   | 0.8211 | -1.06 | down | 50S ribosomal protein L33\ Context:(NC_002946)-[1633434-1633589]\ Notes:in Escherichia coli BM108; a mutation that results in lack of L33 synthesis had no effect on ribosome synthesis or function; there are paralogous genes in several bacterial genomes; and a CXXC motif for zinc binding and an upstream regulation region of the paralog lacking this motif that are regulated by zinc similar to other ribosomal proteins like L31; the proteins in this group lack the CXXC motif |
| NGO1680 | 0.1080 | 2.71  | up   | 0.3620 | 1.42  | up   | 0.4646 | 1.30  | up   | 50S ribosomal protein L28\ Context:(NC_002946)-[1633621-1633854]\ Notes:required for 70S ribosome assembly                                                                                                                                                                                                                                                                                                                                                                                  |
| NGO1681 | 0.6953 | -1.41 | down | 0.0656 | -8.35 | down | 0.9674 | -1.05 | down | hypothetical protein\ Context:(NC_002946)-[1633926-1634114]\ Notes:Best Blastp Hit: emb CAB85379.1  (AL162758) hypothetical protein [Neisseria meningitidis]                                                                                                                                                                                                                                                                                                                                |
| NGO1682 | 0.2074 | -2.96 | down | 0.0348 | -5.73 | down | 0.6309 | 1.23  | up   | efflux pump protein; fatty acid resistance\ Context:(NC_002946)-[1634104-1635627]\ Notes:Best Blastp Hit: gb AAD54074.1  (AF132910) efflux pump protein FarB [Neisseria gonorrhoeae] COG0477 Permeases                                                                                                                                                                                                                                                                                      |
| NGO1683 | 0.5011 | 1.66  | up   | 0.5053 | -1.59 | down | 0.4445 | -1.33 | down | efflux pump protein; fatty acid resistance\ Context:(NC_002946)-[1635651-1636835]\ Notes:Best Blastp Hit: possibly phase variable - 8T residue homopolymer repeat in the coding sequence (ON) COG1566 Multidrug resistance efflux pump                                                                                                                                                                                                                                                      |
| NGO1684 | 0.2367 | 2.07  | up   | 0.2228 | 1.59  | up   | 0.2164 | 1.53  | up   | 7-cyano-7-deazaguanine reductase\ Context:(NC_002946)+[1637094-1637567]\ Notes:NADPH-dependent; catalyzes the reduction of 7-cyano-7-deazaguanine to 7-aminomethyl-7-deazaguanine in queuosine biosynthesis                                                                                                                                                                                                                                                                                 |
| NGO1685 | 0.4128 | 1.53  | up   | 0.4337 | 1.84  | up   | 0.0553 | 3.27  | up   | hypothetical protein\ Context:(NC_002946)+[1637642-1638328]\ Notes:Best Blastp Hit: pir B81214 conserved hypothetical protein NMB0316 [imported] - Neisseria meningitidis (group B strain MD58)<br>>gi 7225536 gb AAF40761.1  (AE002388) conserved hypothetical protein [Neisseria meningitidis MC58] COG1738 Uncharacterized ACR; YhhQ family                                                                                                                                              |

|         |        |       |      |        |        |      |        |       |      |                                                                                                                                                                                                                                                                                                                                                                      |
|---------|--------|-------|------|--------|--------|------|--------|-------|------|----------------------------------------------------------------------------------------------------------------------------------------------------------------------------------------------------------------------------------------------------------------------------------------------------------------------------------------------------------------------|
| NGO1686 | 0.2103 | -1.79 | down | 0.0224 | -3.75  | down | 0.2756 | -1.58 | down | hypothetical protein\ Context:(NC_002946)-[1638678-1639970]\ Notes:Best Blastp Hit: possibly phase variable - 8A residue homopolymer repeat in the coding sequence (ON) COG0739 Membrane proteins related to                                                                                                                                                         |
| NGO1687 | 0.8590 | -1.13 | down | 0.0557 | -4.05  | down | 0.8076 | -1.22 | down | hypothetical protein\ Context:(NC_002946)+[1639882-1641015]\ Notes:Best Blastp Hit: pir     B81790 hypothetical protein NMA2173 [imported] - Neisseria meningitidis (group A strain Z2491) >gi 7380794 emb CAB85385.1  (AL162758) hypothetical protein [Neisseria meningitidis]                                                                                      |
| NGO1688 | 0.0083 | 6.47  | up   | 0.0098 | 10.32  | up   | 0.0138 | 4.76  | up   | putative outer membrane protein OmpU\ Context:(NC_002946)-[1641216-1642685]\ Notes:Best Blastp Hit: emb CAB85386.1  (AL162758) conserved hypothetical protein [Neisseria meningitidis]                                                                                                                                                                               |
| NGO1690 | 0.1721 | -2.22 | down | 0.4111 | 1.36   | up   | 0.6145 | -1.20 | down | hypothetical protein\ Context:(NC_002946)-[1644374-1644619]\ Notes:Best Blastp Hit: gb AAF40757.1  (AE002388) hypothetical protein [Neisseria meningitidis MC58] >gi 7380797 emb CAB85388.1  (AL162758) hypothetical protein [Neisseria meningitidis]                                                                                                                |
| NGO1691 | 0.0983 | -5.95 | down | 0.0108 | -23.72 | down | 0.3596 | 1.47  | up   | hypothetical protein\ Context:(NC_002946)+[1644588-1644734]\ Notes:                                                                                                                                                                                                                                                                                                  |
| NGO1692 | 0.0492 | -2.71 | down | 0.0073 | -4.89  | down | 0.0482 | -2.20 | down | hypothetical protein\ Context:(NC_002946)+[1644722-1645159]\ Notes:Best Blastp Hit: pir     F81790 conserved hypothetical inner membrane protein NMA2177 [imported] - Neisseria meningitidis (group A strain Z2491) >gi 7380798 emb CAB85389.1  (AL162758) conserved hypothetical inner membrane protein [Neisseria meningitidis] COG1981 Predicted membrane protein |
| NGO1693 | 0.3263 | -1.62 | down | 0.2545 | -1.98  | down | 0.1778 | -1.94 | down | hypothetical protein\ Context:(NC_002946)+[1645171-1645647]\ Notes:Best Blastp Hit: pir     D81213 conserved hypothetical protein NMB0309 [imported] - Neisseria meningitidis (group B strain MD58) >gi 7225530 gb AAF40755.1  (AE002388) conserved hypothetical protein [Neisseria meningitidis MC58]                                                               |

|         |        |       |      |        |       |      |        |       |      |                                                                                                                                                                                                                                                                                                                                                                                       |
|---------|--------|-------|------|--------|-------|------|--------|-------|------|---------------------------------------------------------------------------------------------------------------------------------------------------------------------------------------------------------------------------------------------------------------------------------------------------------------------------------------------------------------------------------------|
| NGO1694 | 0.0084 | -6.21 | down | 0.1400 | -2.50 | down | 0.1801 | -2.29 | down | hypothetical protein\ Context:(NC_002946)-[1645677-1646165]\ Notes:Best Blastp Hit: sp P04174 DYR_NEIGO dihydrofolate reductase >gi 66103 pir   RDND dihydrofolate reductase (EC 1.5.1.3) - Neisseria gonorrhoeae COG0262 Dihydrofolate reductase                                                                                                                                     |
| NGO1695 | 0.7144 | -1.19 | down | 0.5028 | -1.30 | down | 0.3971 | -1.29 | down | phospho-2-dehydro-3-deoxyheptonate aldolase\ Context:(NC_002946)-[1646233-1647288]\ Notes:catalyzes the formation of 3-deoxy-D-arabino-hept-2-ulonate 7 phosphate from phosphoenolpyruvate and D-erythrose 4-phosphate; phenylalanine sensitive                                                                                                                                       |
| NGO1699 | 0.8659 | 1.10  | up   | 0.9992 | -1.00 | down | 0.5412 | -1.19 | down | hypothetical protein\ Context:(NC_002946)-[1655425-1656231]\ Notes:Best Blastp Hit: gb AAF40747.1  (AE002386) CcsA-related protein [Neisseria meningitidis MC58]                                                                                                                                                                                                                      |
| NGO1700 | 0.9940 | 1.00  | up   | 0.4230 | -1.42 | down | 0.4177 | -1.26 | down | putative signal recognition particle protein\ Context:(NC_002946)+[1656451-1657821]\ Notes:Best Blastp Hit: pir   F81215 signal recognition particle protein NMB0295 [imported] - Neisseria meningitidis (group B strain MD58) >gi 7225519 gb AAF40746.1  (AE002386) signal recognition particle protein [Neisseria meningitidis MC58] COG0541 Signal recognition particle GTPase Ffh |
| NGO1701 | 0.4327 | -1.47 | down | 0.6234 | -1.27 | down | 0.5932 | -1.17 | down | hypothetical protein\ Context:(NC_002946)+[1658077-1658532]\ Notes:Best Blastp Hit: gb AAC98737.1  (AF052749) unknown [Pseudomonas putida] COG1145 Ferredoxin 2                                                                                                                                                                                                                       |
| NGO1702 | 0.9924 | -1.01 | down | 0.0396 | -4.44 | down | 0.2450 | -2.14 | down | hypothetical protein\ Context:(NC_002946)-[1658587-1659111]\ Notes:Best Blastp Hit: pir   F81792 hypothetical protein NMA2195 [imported] - Neisseria meningitidis (group A strain Z2491) >gi 6900420 emb CAB72030.1  (AJ391261) hypothetical protein [Neisseria meningitidis] >gi 7380814 emb CAB85406.1  (AL162758) hypothetical protein [Neisseria meningitidis]                    |

|         |        |       |      |        |       |      |        |       |      |                                                                                                                                                                                                                                                                                                                                                                    |
|---------|--------|-------|------|--------|-------|------|--------|-------|------|--------------------------------------------------------------------------------------------------------------------------------------------------------------------------------------------------------------------------------------------------------------------------------------------------------------------------------------------------------------------|
| NGO1704 | 0.4065 | -1.61 | down | 0.0930 | -2.41 | down | 0.3854 | -1.61 | down | hypothetical protein\ Context:(NC_002946)-[1660138-1660335]\ Notes:Best Blastp Hit: pir   F81792 hypothetical protein NMA2195 [imported] - Neisseria meningitidis (group A strain Z2491) >gi 6900420 emb CAB72030.1  (AJ391261) hypothetical protein [Neisseria meningitidis] >gi 7380814 emb CAB85406.1  (AL162758) hypothetical protein [Neisseria meningitidis] |
| NGO1705 | 0.3784 | -1.91 | down | 0.1766 | -3.18 | down | 0.8264 | 1.16  | up   | hypothetical protein\ Context:(NC_002946)-[1660384-1660782]\ Notes:Best Blastp Hit: gb AAF40742.1  (AE002386) conserved hypothetical protein [Neisseria meningitidis MC58] >gi 7380815 emb CAB85407.1  (AL162758) conserved hypothetical inner membrane protein [Neisseria meningitidis]                                                                           |
| NGO1706 | 0.5755 | -1.28 | down | 0.7319 | 1.13  | up   | 0.7728 | -1.10 | down | LysR family transcriptional regulator\ Context:(NC_002946)+[1660890-1661801]\ Notes:Best Blastp Hit: gb AAF40741.1  (AE002386) transcriptional regulator; putative [Neisseria meningitidis MC58] COG0583 Transcriptional regulators; LysR family                                                                                                                   |
| NGO1707 | 0.3906 | 1.59  | up   | 0.7774 | 1.13  | up   | 0.9184 | -1.05 | down | putative deoxyribodopyrimidine photolyase\ Context:(NC_002946)+[1661791-1663089]\ Notes:Best Blastp Hit: emb CAB85409.1  (AL162758) deoxyribodopyrimidine photolyase [Neisseria meningitidis] COG0415 Deoxyypyrimidine photolyase                                                                                                                                  |
| NGO1708 | 0.3652 | 1.82  | up   | 0.0654 | -3.82 | down | 0.6217 | -1.61 | down | ATP-dependent DNA helicase DinG\ Context:(NC_002946)+[1663270-1665420]\ Notes:helicase involved in DNA repair and perhaps also replication                                                                                                                                                                                                                         |
| NGO1709 | 0.1748 | 2.42  | up   | 0.0464 | 4.11  | up   | 0.0754 | 4.95  | up   | hypothetical protein\ Context:(NC_002946)+[1665456-1666070]\ Notes:Best Blastp Hit: possibly phase variable - 8A residue homopolymer repeat in the coding sequence (ON)                                                                                                                                                                                            |
| NGO1710 | 0.0367 | -4.53 | down | 0.0633 | -8.39 | down | 0.4521 | -2.10 | down | putative trans-acylase protein\ Context:(NC_002946)-[1666206-1668074]\ Notes:Best Blastp Hit: emb CAB85413.1  (AL162758) putative inner membrane trans-acylase protein [Neisseria meningitidis] COG1835 Predicted acyltransferases                                                                                                                                 |

|         |        |       |      |        |       |      |        |       |      |                                                                                                                                                                                                                                                                                                                                                             |
|---------|--------|-------|------|--------|-------|------|--------|-------|------|-------------------------------------------------------------------------------------------------------------------------------------------------------------------------------------------------------------------------------------------------------------------------------------------------------------------------------------------------------------|
| NGO1711 | 0.6815 | -1.29 | down | 0.2427 | 1.56  | up   | 0.5464 | 1.20  | up   | adenylosuccinate lyase\ Context:(NC_002946)-[1668154-1669524]\ Notes:Catalyzes two discrete reactions in the de novo synthesis of purines: the cleavage of adenylosuccinate and succinylaminoimidazole carboxamide ribotide                                                                                                                                 |
| NGO1712 | 0.1697 | -2.46 | down | 0.0139 | -5.62 | down | 0.0057 | -5.59 | down | hypothetical protein\ Context:(NC_002946)-[1669596-1670228]\ Notes:Best Blastp Hit: emb CAB85415.1  (AL162758) hypothetical protein [Neisseria meningitidis] COG1611 Predicted Rossmann fold nucleotide-binding                                                                                                                                             |
| NGO1713 | 0.5098 | 1.37  | up   | 0.6132 | -1.22 | down | 0.9495 | 1.03  | up   | hypothetical protein\ Context:(NC_002946)+[1670357-1672264]\ Notes:Best Blastp Hit: emb CAB85416.1  (AL162758) hypothetical protein [Neisseria meningitidis] COG0557 Exoribonucleases                                                                                                                                                                       |
| NGO1714 | 0.6927 | 1.37  | up   | 0.0469 | 2.15  | up   | 0.2994 | 1.76  | up   | putative cis-trans isomerase\ Context:(NC_002946)-[1672744-1673745]\ Notes:Best Blastp Hit: >pir   B81216 peptidyl-prolyl cis-trans isomerase NMB0281 [imported] - Neisseria meningitidis (group B strain MD58) gb AAF40735.1  (AE002385) peptidyl-prolyl cis-trans isomerase [Neisseria meningitidis MC58] COG0760 Parvulin-like peptidyl-prolyl isomerase |
| NGO1715 | 0.8369 | 1.10  | up   | 0.7744 | -1.12 | down | 0.2631 | 1.34  | up   | OstA\ Context:(NC_002946)-[1673847-1676252]\ Notes:Best Blastp Hit: emb CAB85418.1  (AL162758) putative solvent tolerance protein [Neisseria meningitidis] COG1452 Organic solvent tolerance protein OstA                                                                                                                                                   |
| NGO1716 | 0.8590 | -1.09 | down | 0.5925 | -1.29 | down | 0.3135 | -1.34 | down | hypothetical protein\ Context:(NC_002946)+[1676322-1677326]\ Notes:Best Blastp Hit: pir   C81794 hypothetical protein NMA2208 [imported] - Neisseria meningitidis (group A strain Z2491) >gi 7380827 emb CAB85419.1  (AL162758) hypothetical protein [Neisseria meningitidis]                                                                               |
| NGO1717 | 0.3563 | 1.67  | up   | 0.5720 | 1.27  | up   | 0.6386 | 1.17  | up   | putative thiol:disulphide interchange protein\ Context:(NC_002946)-[1677383-1678087]\ Notes:Best Blastp Hit: gb AAF40732.1  (AE002384) thiol:disulfide interchange protein DsbA [Neisseria meningitidis MC58] COG0526 Thiol-disulfide isomerase and thioredoxins                                                                                            |

|         |        |        |      |        |        |      |        |        |      |                                                                                                                                                                                                                                                                                                                                       |
|---------|--------|--------|------|--------|--------|------|--------|--------|------|---------------------------------------------------------------------------------------------------------------------------------------------------------------------------------------------------------------------------------------------------------------------------------------------------------------------------------------|
| NGO1718 | 0.0004 | -25.19 | down | 0.0003 | -16.75 | down | 0.0080 | -11.14 | down | hypothetical protein\ Context:(NC_002946)+[1678525-1680063]\ Notes:Best Blastp Hit: pir   B81217 virulence factor MviN NMB0277 [imported] - Neisseria meningitidis (group B strain MD58) >gi 7225502 gb AAF40731.1  (AE002384) virulence factor MviN [Neisseria meningitidis MC58] COG0728 Uncharacterized membrane protein; putative |
| NGO1719 | 0.2329 | -2.67  | down | 0.0043 | -10.55 | down | 0.8877 | 1.15   | up   | hypothetical protein\ Context:(NC_002946)+[1680196-1681155]\ Notes:Best Blastp Hit: gb AAF40730.1  (AE002384) conserved hypothetical protein [Neisseria meningitidis MC58] COG0429 Predicted hydrolase of the                                                                                                                         |
| NGO1720 | 0.1699 | 3.80   | up   | 0.0209 | -9.17  | down | 0.1809 | -7.53  | down | hypothetical protein\ Context:(NC_002946)-[1681152-1681262]\ Notes:                                                                                                                                                                                                                                                                   |
| NGO1721 | 0.9559 | 1.03   | up   | 0.2650 | -1.44  | down | 0.2435 | -2.41  | down | indole-3-glycerol-phosphate synthase\ Context:(NC_002946)+[1681206-1681988]\ Notes:involved in tryptophan biosynthesis; amino acid biosynthesis; converts 1-(2-carboxyphenylamino)-1-deoxy-D-ribulose 5-phosphate to C(1)-(3-indolyl)-glycerol 3-phosphate and carbon dioxide and water                                               |
| NGO1722 | 0.0661 | 4.39   | up   | 0.1362 | -3.20  | down | 0.5523 | 1.63   | up   | RecQ\ Context:(NC_002946)+[1682051-1684354]\ Notes:Best Blastp Hit: gb AAD05424.1  (AF047374) RecQ [Neisseria gonorrhoeae] COG0514 Superfamily II DNA helicases; RecQ family; putative ATP-dependent DNA helicase                                                                                                                     |
| NGO1723 | 0.4672 | -1.64  | down | 0.2279 | -2.83  | down | 0.4097 | 2.05   | up   | hypothetical protein\ Context:(NC_002946)-[1684391-1685692]\ Notes:Best Blastp Hit: emb CAB85425.1  (AL162758) hypothetical protein [Neisseria meningitidis]                                                                                                                                                                          |
| NGO1724 | 0.3287 | 1.76   | up   | 0.2669 | 3.09   | up   | 0.3703 | -1.39  | down | hypothetical protein\ Context:(NC_002946)-[1686074-1686862]\ Notes:Best Blastp Hit: gb AAF40725.1  (AE002383) hypothetical protein [Neisseria meningitidis MC58]                                                                                                                                                                      |
| NGO1725 | 0.0451 | -3.32  | down | 0.0187 | -3.66  | down | 0.0321 | -2.63  | down | putative bioH - biotin biosynthesis protein\ Context:(NC_002946)-[1686859-1687635]\ Notes:Best Blastp Hit: emb CAB85427.1  (AL162758) putative hydrolase [Neisseria meningitidis] COG0570 BioH; catalyzes some early step in biotin                                                                                                   |

|         |        |       |      |        |       |      |        |       |      |                                                                                                                                                                                                                                                                                                    |
|---------|--------|-------|------|--------|-------|------|--------|-------|------|----------------------------------------------------------------------------------------------------------------------------------------------------------------------------------------------------------------------------------------------------------------------------------------------------|
| NGO1726 | 0.1775 | -1.93 | down | 0.0253 | -3.19 | down | 0.8660 | -1.07 | down | hypothetical protein\ Context:(NC_002946)+[1687607-1688332]\ Notes:Best Blastp Hit: emb CAB85428.1  (AL162758) hypothetical protein [Neisseria meningitidis] COG1040 Predicted amidophosphoribosyl transferases                                                                                    |
| NGO1727 | 0.0259 | 8.25  | up   | 0.1803 | 3.63  | up   | 0.2738 | 1.36  | up   | hypothetical protein\ Context:(NC_002946)+[1688397-1688861]\ Notes:Best Blastp Hit: gb AAF40722.1  (AE002383) RNA methyltransferase; TrmH family [Neisseria meningitidis MC58] COG0219 Predicted rRNA methylase (SpoU class)                                                                       |
| NGO1728 | 0.9870 | 1.01  | up   | 0.6399 | -1.24 | down | 0.5125 | 1.20  | up   | hypothetical protein\ Context:(NC_002946)+[1688989-1689675]\ Notes:Best Blastp Hit: gb AAF40721.1  (AE002383) conserved hypothetical protein [Neisseria meningitidis MC58] COG0797 Lipoproteins                                                                                                    |
| NGO1729 | 0.4549 | -1.43 | down | 0.1477 | -2.18 | down | 0.1250 | -2.16 | down | hypothetical protein\ Context:(NC_002946)+[1689736-1690062]\ Notes:Best Blastp Hit: pir C81218 conserved hypothetical protein NMB0266 [imported] - Neisseria meningitidis (group B strain MD58) >gi 7225490 gb AAF40720.1  (AE002383) conserved hypothetical protein [Neisseria meningitidis MC58] |
| NGO1730 | 0.6343 | 1.34  | up   | 0.1441 | -2.82 | down | 0.2730 | -1.76 | down | Holliday junction DNA helicase motor protein\ Context:(NC_002946)+[1690144-1690728]\ Notes:plays an essential role in ATP-dependent branch migration of the Holliday junction                                                                                                                      |
| NGO1731 | 0.6627 | -2.02 | down | 0.8943 | 1.31  | up   | 0.7517 | -1.37 | down | hypothetical protein\ Context:(NC_002946)+[1690728-1690865]\ Notes:Best Blastp Hit: emb CAB85433.1  (AL162758) hypothetical protein [Neisseria meningitidis]                                                                                                                                       |
| NGO1732 | 0.9218 | 1.07  | up   | 0.6268 | 1.27  | up   | 0.9460 | -1.05 | down | putative ABC transporter; ATP-binding protein\ Context:(NC_002946)+[1690892-1692748]\ Notes:Best Blastp Hit: emb CAB85434.1  (AL162758) putative ABC transporter [Neisseria meningitidis] COG1132 ABC-type multidrug/protein/lipid                                                                 |
| NGO1733 | 0.0314 | -3.41 | down | 0.5179 | -1.45 | down | 0.8659 | 1.07  | up   | ribosome-associated GTPase\ Context:(NC_002946)+[1692753-1693676]\ Notes:EngC; RsgA; CpgA; circularly permuted GTPase; ribosome small subunit-dependent GTPase A; has the pattern G4-G1-G3 as opposed to other GTPases; interacts strongly with 30S ribosome which stimulates GTPase activity      |

|         |        |        |      |        |        |      |        |       |      |                                                                                                                                                                                                                                                                                                                                                                     |
|---------|--------|--------|------|--------|--------|------|--------|-------|------|---------------------------------------------------------------------------------------------------------------------------------------------------------------------------------------------------------------------------------------------------------------------------------------------------------------------------------------------------------------------|
| NGO1734 | 0.6314 | -1.26  | down | 0.1267 | -3.05  | down | 0.4516 | -1.30 | down | putative exodeoxyribonuclease VII small subunit\<br>Context:(NC_002946)+[1693789-1694013]\ Notes:Best<br>Blastp Hit: gb AAF40716.1  (AE002383)<br>exodeoxyribonuclease; small subunit [Neisseria meningitidis<br>MC58] COG1722 Exonuclease VII small subunit                                                                                                        |
| NGO1735 | 0.3462 | 1.89   | up   | 0.5147 | 1.23   | up   | 0.7152 | 1.09  | up   | hypothetical protein\<br>Context:(NC_002946)+[1693997-<br>1694893]\ Notes:Best Blastp Hit: pir   E81796<br>geranyltranstransferase (EC 2.5.1.10) NMA2226 [imported]<br>Neisseria meningitidis (group A strain Z2491)<br>>gi 7380845 emb CAB85437.1  (AL162758)<br>geranyltranstransferase [Neisseria meningitidis] COG0142<br>Geranylgeranyl pyrophosphate synthase |
| NGO1736 | 0.3409 | -1.88  | down | 0.1629 | -2.25  | down | 0.2487 | -2.02 | down | hypothetical protein\<br>Context:(NC_002946)-[1695010-<br>1695360]\ Notes:Best Blastp Hit: pir   F81796 hypothetical<br>inner membrane protein NMA2227 [imported] - Neisseria<br>meningitidis (group A strain Z2491)<br>>gi 7380846 emb CAB85438.1  (AL162758) hypothetical<br>inner membrane protei [Neisseria meningitidis]                                       |
| NGO1737 | 0.0307 | -6.24  | down | 0.0080 | -6.02  | down | 0.1062 | -2.56 | down | NADH dehydrogenase subunit N\<br>Context:(NC_002946)-<br>[1695421-1696866]\ Notes:Catalyzes the transfer of<br>electrons from NADH to ubiquinone                                                                                                                                                                                                                    |
| NGO1738 | 0.1846 | -2.18  | down | 0.0136 | -4.87  | down | 0.1145 | -3.39 | down | NADH dehydrogenase subunit M\<br>Context:(NC_002946)-<br>[1696876-1698372]\ Notes:Catalyzes the transfer of<br>electrons from NADH to ubiquinone                                                                                                                                                                                                                    |
| NGO1739 | 0.1933 | -2.30  | down | 0.1722 | -3.35  | down | 0.7784 | 1.60  | up   | hypothetical protein\<br>Context:(NC_002946)-[1698486-<br>1699649]\ Notes:Best Blastp Hit: pir   A71813 hypothetical<br>protein jhp1392 - Helicobacter pylori (strain J99)<br>>gi 4156012 gb AAD06973.1  (AE001561) putative<br>[Helicobacter pylori J99]                                                                                                           |
| NGO1740 | 0.0731 | -3.61  | down | 0.0691 | -8.95  | down | 0.1337 | -5.10 | down | NADH dehydrogenase subunit L\<br>Context:(NC_002946)-<br>[1699833-1701857]\ Notes:Catalyzes the transfer of<br>electrons from NADH to ubiquinone                                                                                                                                                                                                                    |
| NGO1741 | 0.2149 | -2.48  | down | 0.0010 | -17.77 | down | 0.3741 | -2.74 | down | NADH dehydrogenase subunit K\<br>Context:(NC_002946)-<br>[1701860-1702165]\ Notes:Catalyzes the transfer of<br>electrons from NADH to ubiquinone                                                                                                                                                                                                                    |
| NGO1742 | 0.0019 | -13.74 | down | 0.0005 | -54.37 | down | 0.6016 | -1.86 | down | hypothetical protein\<br>Context:(NC_002946)-[1702162-<br>1702833]\ Notes:Best Blastp Hit: gb AAF40707.1 <br>(AE002382) NADH dehydrogenase I; J subunit [Neisseria<br>meningitidis MC58]                                                                                                                                                                            |



|         |        |        |      |        |         |      |        |        |      |                                                                                                                                                                                                                                                                                                                                                                     |
|---------|--------|--------|------|--------|---------|------|--------|--------|------|---------------------------------------------------------------------------------------------------------------------------------------------------------------------------------------------------------------------------------------------------------------------------------------------------------------------------------------------------------------------|
| NGO1743 | 0.8343 | -1.12  | down | 0.6893 | -1.33   | down | 0.0379 | -2.60  | down | NADH dehydrogenase subunit I \ Context:(NC_002946)-[1702845-1703324] \ Notes:Catalyzes the transfer of electrons from NADH to ubiquinone                                                                                                                                                                                                                            |
| NGO1744 | 0.0041 | -5.24  | down | 0.0352 | -12.94  | down | 0.0822 | -3.22  | down | hypothetical protein \ Context:(NC_002946)-[1703405-1704481] \ Notes:Best Blastp Hit: pir     E81219 NADH dehydrogenase I; H chain NMB0250 [imported] - Neisseria meningitidis (group B strain MD58)<br>>gi 7225473 gb AAF40704.1  (AE002382) NADH dehydrogenase I; H subunit [Neisseria meningitidis MC58]<br>COG1005 NADH-ubiquinone oxidoreductase subunit 1     |
| NGO1745 | 0.0092 | -5.91  | down | 0.0006 | -5.87   | down | 0.0158 | -2.69  | down | NADH dehydrogenase subunit G \ Context:(NC_002946)-[1704484-1706745] \ Notes:Catalyzes the transfer of electrons from NADH to ubiquinone                                                                                                                                                                                                                            |
| NGO1746 | 0.0010 | -10.14 | down | 0.0480 | -3.77   | down | 0.0152 | -15.89 | down | hypothetical protein \ Context:(NC_002946)-[1707458-1708759] \ Notes:Best Blastp Hit: pir     D81222 NADH dehydrogenase I; F chain NMB0246 [imported] - Neisseria meningitidis (group B strain MD58)<br>>gi 7225468 gb AAF40700.1  (AE002381) NADH dehydrogenase I; F subunit [Neisseria meningitidis MC58]<br>COG1894 NADH-ubiquinone oxidoreductase; NADH-binding |
| NGO1747 | 0.0006 | -31.46 | down | 0.0018 | -27.64  | down | 0.0010 | -10.46 | down | NADH dehydrogenase subunit E \ Context:(NC_002946)-[1709149-1709622] \ Notes:Catalyzes the transfer of electrons from NADH to ubiquinone                                                                                                                                                                                                                            |
| NGO1748 | 0.0015 | -39.09 | down | 0.0006 | -18.61  | down | 0.0036 | -16.06 | down | NADH dehydrogenase subunit D \ Context:(NC_002946)-[1709622-1710878] \ Notes:Catalyzes the transfer of electrons from NADH to ubiquinone                                                                                                                                                                                                                            |
| NGO1749 | 0.0001 | -24.96 | down | 0.0007 | -39.62  | down | 0.0073 | -20.47 | down | NADH dehydrogenase subunit C \ Context:(NC_002946)-[1710868-1711461] \ Notes:Catalyzes the transfer of electrons from NADH to ubiquinone                                                                                                                                                                                                                            |
| NGO1750 | 0.0008 | -27.33 | down | 0.0000 | -393.27 | down | 0.0330 | -17.23 | down | NADH dehydrogenase subunit B \ Context:(NC_002946)-[1711474-1711956] \ Notes:The point of entry for the majority of electrons that traverse the respiratory chain eventually resulting in the reduction of oxygen                                                                                                                                                   |

|         |        |        |      |        |        |      |        |        |      |                                                                                                                                                                                                                                                                                                                                                                                                                          |
|---------|--------|--------|------|--------|--------|------|--------|--------|------|--------------------------------------------------------------------------------------------------------------------------------------------------------------------------------------------------------------------------------------------------------------------------------------------------------------------------------------------------------------------------------------------------------------------------|
| NGO1751 | 0.0041 | -11.74 | down | 0.0000 | -53.97 | down | 0.0147 | -13.92 | down | hypothetical protein\ Context:(NC_002946)-[1711947-1712303]\ Notes:Best Blastp Hit: pir    G81992 NADH dehydrogenase (ubiquinone) (EC 1.6.5.3) I chain A NMA0019 [imported] - Neisseria meningitidis (group A strain Z2491) >gi 7378797 emb CAB83339.1  (AL162752) NADH dehydrogenase I chain A [Neisseria meningitidis] COG0838 NADH-ubiquinone oxidoreductase subunit 3                                                |
| NGO1752 | 0.3902 | 1.58   | up   | 0.6692 | 1.22   | up   | 0.6533 | 1.16   | up   | hypothetical protein\ Context:(NC_002946)-[1712796-1714283]\ Notes:Best Blastp Hit: pir    H81992 probable integral membrane protein NMA0020 [imported] - Neisseria meningitidis (group A strain Z2491) >gi 7378798 emb CAB83340.1  (AL162752) putative integral membrane protein [Neisseria meningitidis] COG0421 Spermidine synthase                                                                                   |
| NGO1753 | 0.9160 | 1.06   | up   | 0.7748 | -1.15  | down | 0.7911 | -1.09  | down | hypothetical protein\ Context:(NC_002946)-[1714270-1714890]\ Notes:Best Blastp Hit: pir    E81221 probable integral membrane protein NMA0021 [imported] - Neisseria meningitidis (group B strain MD58; group A strain Z2491) >gi 7225461 gb AAF40693.1  (AE002381) hypothetical protein [Neisseria meningitidis MC58] >gi 7378799 emb CAB83341.1  (AL162752) putative integral membrane protein [Neisseria meningitidis] |
| NGO1754 | 0.3484 | 1.72   | up   | 0.3787 | 1.41   | up   | 0.8928 | 1.05   | up   | MafI protein\ Context:(NC_002946)-[1715118-1715465]\ Notes:MafI3                                                                                                                                                                                                                                                                                                                                                         |
| NGO1755 | 0.1022 | -5.91  | down | 0.2327 | -6.02  | down | 0.4670 | 2.41   | up   | hypothetical protein\ Context:(NC_002946)-[1715638-1715838]\ Notes:Best Blastp Hit: emb CAB83579.1  (AL162752) truncated pilin [Neisseria meningitidis]                                                                                                                                                                                                                                                                  |
| NGO1756 | 0.9426 | 1.05   | up   | 0.1874 | -2.77  | down | 0.4042 | 1.35   | up   | hypothetical protein\ Context:(NC_002946)-[1716172-1716486]\ Notes:                                                                                                                                                                                                                                                                                                                                                      |
| NGO1757 | 0.3575 | 1.67   | up   | 0.7562 | 1.34   | up   | 0.7336 | 1.26   | up   | hypothetical protein\ Context:(NC_002946)-[1716628-1718835]\ Notes:Best Blastp Hit: pir    F81993 DNA helicase II (EC 3.6.1.-) NMA0027 [imported] - Neisseria meningitidis (group A strain Z2491) >gi 6900436 emb CAB72035.1  (AJ391262) DNA helicase II [Neisseria meningitidis] >gi 7378804 emb CAB83346.1  (AL162752) DNA helicase II [Neisseria meningitidis] COG0210 Superfamily I DNA and RNA helicases            |

|         |        |       |      |        |        |      |        |       |      |                                                                                                                                                                                                                                                                                                                                                                                                                                                                                                        |
|---------|--------|-------|------|--------|--------|------|--------|-------|------|--------------------------------------------------------------------------------------------------------------------------------------------------------------------------------------------------------------------------------------------------------------------------------------------------------------------------------------------------------------------------------------------------------------------------------------------------------------------------------------------------------|
| NGO1758 | 0.1217 | -2.57 | down | 0.0058 | -9.50  | down | 0.0861 | 1.67  | up   | GlnE\ Context:(NC_002946)-[1719259-1721949]\ Notes:Best Blastp Hit: pir    E81994 probable [glutamate-- ammonia-ligase] adenylyltransferase (EC 2.7.7.42) NMA0035 [imported] - Neisseria meningitidis (group A strain Z2491) >gi 7378811 emb CAB83353.1  (AL162752) putative glutamate-ammonia-ligase adenylyltransferase [Neisseria meningitidis] COG1391 Glutamine synthetase adenylyltransferase                                                                                                    |
| NGO1759 | 0.2730 | -2.41 | down | 0.0259 | -9.18  | down | 0.5683 | -1.94 | down | hypothetical protein\ Context:(NC_002946)-[1722143-1722478]\ Notes:Best Blastp Hit: gb AAF40679.1  (AE002380) hypothetical protein [Neisseria meningitidis MC58]                                                                                                                                                                                                                                                                                                                                       |
| NGO1760 | 0.0158 | -5.99 | down | 0.0304 | -16.48 | down | 0.4272 | -2.98 | down | hypothetical protein\ Context:(NC_002946)-[1722492-1722965]\ Notes:Best Blastp Hit: pir    H81222 hypothetical protein NMB0222 [imported] - Neisseria meningitidis (group B strain MD58; group A strain Z2491) >gi 7225445 gb AAF40678.1  (AE002380) hypothetical protein [Neisseria meningitidis MC58] >gi 7378813 emb CAB83355.1  (AL162752) hypothetical protein NMA0037 [Neisseria meningitidis]                                                                                                   |
| NGO1761 | 0.2079 | 2.30  | up   | 0.8885 | 1.09   | up   | 0.6449 | 1.25  | up   | dihydroorotate dehydrogenase 2\ Context:(NC_002946)-[1723162-1724169]\ Notes:catalyzes the conversion of dihydroorotate to orotate in the pyrimidine biosynthesis pathway; uses a flavin nucleotide as an essential cofactor; class 2 enzymes are monomeric and compared to the class 1 class 2 possess an extended N terminus; which plays a role in the membrane association of the enzyme and provides the binding site for the respiratory quinones that serve as physiological electron acceptors |
| NGO1762 | 0.1338 | 2.55  | up   | 0.1717 | 1.61   | up   | 0.2472 | 1.71  | up   | hypothetical protein\ Context:(NC_002946)+[1724401-1724637]\ Notes:Best Blastp Hit: pir    F81222 acyl carrier protein NMB0220 [imported] - Neisseria meningitidis (group B strain MD58; group A strain Z2491) >gi 7225443 gb AAF40676.1  (AE002380) acyl carrier protein [Neisseria meningitidis MC58] >gi 7378819 emb CAB83361.1  (AL162752) acyl carrier protein [Neisseria meningitidis] COG0236 Acyl carrier protein                                                                              |

|         |        |       |      |        |        |      |        |       |      |                                                                                                                                                                                                                                                                                                                                                                                                                      |
|---------|--------|-------|------|--------|--------|------|--------|-------|------|----------------------------------------------------------------------------------------------------------------------------------------------------------------------------------------------------------------------------------------------------------------------------------------------------------------------------------------------------------------------------------------------------------------------|
| NGO1763 | 0.1354 | 2.54  | up   | 0.0542 | 2.04   | up   | 0.2874 | 1.55  | up   | 3-oxoacyl-(acyl carrier protein) synthase II\<br>Context:(NC_002946)+[1724794-1726041]\ Notes:FabF;<br>beta-ketoacyl-ACP synthase II; KASII; catalyzes a<br>condensation reaction in fatty acid biosynthesis: addition of<br>an acyl acceptor of two carbons from malonyl-ACP;<br>required for the elongation of short-chain unsaturated acyl-<br>ACP                                                                |
| NGO1765 | 0.0287 | -4.35 | down | 0.0502 | -2.87  | down | 0.9116 | 1.06  | up   | PglA\ Context:(NC_002946)+[1728025-1729155]\<br>Notes:Best Blastp Hit: possibly phase variable - 10G residue<br>homopolymer repeat in the coding sequence (ON)<br>COG0438 Glycosyltransferases I; putative<br>glycosyltransferase                                                                                                                                                                                    |
| NGO1767 | 0.7052 | -1.24 | down | 0.2111 | -1.54  | down | 0.6270 | -1.17 | down | KatA\ Context:(NC_002946)+[1730757-1732271]\<br>Notes:Best Blastp Hit: pir    D81224 catalase (EC 1.11.1.6)<br>NMA0050 [similarity] - Neisseria meningitidis (group B<br>strain MD58; group A strain Z2491)<br>>gi 7225438 gb AAF40672.1  (AE002379) catalase<br>[Neisseria meningitidis MC58]<br>>gi 7378825 emb CAB83367.1  (AL162752) catalase<br>[Neisseria meningitidis] COG0753 Catalase; putative<br>catalase |
| NGO1768 | 0.0374 | -7.21 | down | 0.0009 | -36.42 | down | 0.0173 | -6.90 | down | hypothetical protein\ Context:(NC_002946)+[1732787-<br>1733353]\ Notes:Best Blastp Hit: pir    C81224 conserved<br>hypothetical protein NMB0215 [imported] - Neisseria<br>meningitidis (group B strain MD58)<br>>gi 7225437 gb AAF40671.1  (AE002379) conserved<br>hypothetical protein [Neisseria meningitidis MC58]<br>COG1971 Predicted membrane protein                                                          |
| NGO1769 | 0.0457 | -4.38 | down | 0.0160 | -22.14 | down | 0.0262 | -8.01 | down | CcpR\ Context:(NC_002946)+[1733575-1734738]\<br>Notes:Best Blastp Hit: pir    B70313 cytochrome-c<br>peroxidase (EC 1.11.1.5) - Aquifex aeolicus<br>>gi 2982865 gb AAC06485.1  (AE000675) cytochrome c<br>peroxidase [Aquifex aeolicus] COG1858 Cytochrome c<br>peroxidase; putative cytochrome-c peroxidase                                                                                                         |
| NGO1770 | 0.9668 | -1.03 | down | 0.0846 | 2.78   | up   | 0.1531 | 2.84  | up   | PrIC\ Context:(NC_002946)-[1735319-1737355]\<br>Notes:Best Blastp Hit: pir    G81996 oligopeptidase A (EC<br>3.4.24.70) NMA0054 [imported] - Neisseria meningitidis<br>(group A strain Z2491) >gi 7378829 emb CAB83371.1 <br>(AL162752) oligopeptidase A [Neisseria meningitidis]<br>COG0339 Zn-dependent oligopeptidases; putative<br>oligopeptidase A                                                              |

|         |        |       |      |        |        |      |        |       |      |                                                                                                                                                                                                                                                                                                              |
|---------|--------|-------|------|--------|--------|------|--------|-------|------|--------------------------------------------------------------------------------------------------------------------------------------------------------------------------------------------------------------------------------------------------------------------------------------------------------------|
| NGO1771 | 0.1584 | -2.75 | down | 0.0004 | -14.39 | down | 0.0801 | -4.11 | down | hypothetical protein\ Context:(NC_002946)-[1737443-1738435]\ Notes:Best Blastp Hit: pir    E81225 hypothetical protein NMB0213 [imported] - Neisseria meningitidis (group B strain MD58) >gi 7225434 gb AAF40669.1  (AE002378) hypothetical protein [Neisseria meningitidis MC58]                            |
| NGO1772 | 0.7799 | 1.14  | up   | 0.4257 | -1.63  | down | 0.5703 | 1.18  | up   | DNA gyrase subunit B\ Context:(NC_002946)+[1738581-1740971]\ Notes:negatively supercoils closed circular double-stranded DNA                                                                                                                                                                                 |
| NGO1773 | 0.3377 | -1.66 | down | 0.1699 | -2.60  | down | 0.1050 | -2.60 | down | hypothetical protein\ Context:(NC_002946)+[1741070-1742455]\ Notes:Best Blastp Hit: pir    C81225 L-serine dehydratase NMB0211 [imported] - Neisseria meningitidis (group B strain MD58) >gi 7225432 gb AAF40667.1  (AE002378) L-serine dehydratase [Neisseria meningitidis MC58] COG1760 L-serine deaminase |
| NGO1774 | 0.5141 | -1.95 | down | 0.1823 | -3.31  | down | 0.1151 | -2.94 | down | putative potassium-efflux system protein\ Context:(NC_002946)-[1743699-1745651]\ Notes:Best Blastp Hit: gb AAF40666.1  (AE002378) glutathione-regulated potassium-efflux system protein [Neisseria meningitidis MC58] COG0475 K efflux system; membrane domain                                               |
| NGO1775 | 0.3046 | -2.37 | down | 0.0030 | -10.27 | down | 0.0630 | -3.99 | down | putative ferredoxin\ Context:(NC_002946)+[1745797-1746636]\ Notes:Best Blastp Hit: emb CAB83377.1  (AL162752) putative ferredoxin [Neisseria meningitidis] COG1145 Ferredoxin 2                                                                                                                              |
| NGO1776 | 0.0057 | -4.91 | down | 0.0035 | -30.48 | down | 0.2003 | -5.19 | down | glyceraldehyde-3-phosphate dehydrogenase\ Context:(NC_002946)+[1746835-1747866]\ Notes:catalyzes the formation of 3-phospho-D-glyceroyl phosphate from D-glyceraldehyde 3-phosphate                                                                                                                          |
| NGO1777 | 0.8525 | -1.29 | down | 0.0024 | -45.25 | down | 0.1642 | -4.27 | down | hypothetical protein\ Context:(NC_002946)+[1747904-1748062]\ Notes:Best Blastp Hit: gb AAF42457.1  (AE002563) hypothetical protein [Neisseria meningitidis MC58]                                                                                                                                             |
| NGO1778 | 0.1935 | -2.77 | down | 0.0010 | -5.69  | down | 0.0525 | -3.24 | down | leucyl/phenylalanyl-tRNA--protein transferase\ Context:(NC_002946)-[1748121-1748846]\ Notes:leucyltransferase; phenylalanyltransferase; functions in the N-end rule pathway; transfers Leu; Phe; Met; from aminoacyl-tRNAs to N-terminal of proteins with Arg or Lys                                         |

|         |        |       |      |        |       |      |        |       |      |                                                                                                                                                                                                                                                                                                                                                                                                                                            |
|---------|--------|-------|------|--------|-------|------|--------|-------|------|--------------------------------------------------------------------------------------------------------------------------------------------------------------------------------------------------------------------------------------------------------------------------------------------------------------------------------------------------------------------------------------------------------------------------------------------|
| NGO1779 | 0.0968 | 2.72  | up   | 0.2495 | 1.64  | up   | 0.2776 | 1.49  | up   | hypothetical protein\ Context:(NC_002946)-[1748916-1749350]\ Notes:Best Blastp Hit: sp Q51008 FUR_NEIGO ferric uptake regulation protein (ferric uptake regulator) >gi 349012 gb AAA72351.1  (L11361) [Neisseria gonorrhoeae fur gene homologue; complete cds.]; gene product [Neisseria gonorrhoeae] COG0735 Ferric uptake regulation protein                                                                                             |
| NGO1780 | 0.4595 | 1.53  | up   | 0.7894 | 1.13  | up   | 0.2403 | 1.42  | up   | hypothetical protein\ Context:(NC_002946)+[1749577-1749954]\ Notes:Best Blastp Hit: pir   H81997 probable lipoprotein NMA0065 [imported] - Neisseria meningitidis (group A strain Z2491) >gi 7378838 emb CAB83381.1  (AL162752) putative lipoprotein [Neisseria meningitidis]                                                                                                                                                              |
| NGO1781 | 0.0886 | 2.50  | up   | 0.0451 | 2.21  | up   | 0.0539 | 1.74  | up   | dihydrodipicolinate reductase\ Context:(NC_002946)+[1749964-1750773]\ Notes:catalyzes the reduction of 2;3-dihydrodipicolinate to 2;3;4;5-tetrahydrodipicolinate in lysine and diaminopimelate biosynthesis                                                                                                                                                                                                                                |
| NGO1782 | 0.0397 | -3.04 | down | 0.0082 | -7.53 | down | 0.0804 | -2.96 | down | LpxB\ Context:(NC_002946)-[1751413-1752585]\ Notes:Best Blastp Hit: pir   A81226 lipid-A-disaccharide synthase NMB0199 [imported] - Neisseria meningitidis (group B strain MD58) >gi 7225420 gb AAF40656.1  (AE002377) lipid-A-disaccharide synthase [Neisseria meningitidis MC58] COG0763 Lipid A disaccharide synthetase; putative lipid-A-disaccharide synthase                                                                         |
| NGO1783 | 0.0784 | 2.86  | up   | 0.5355 | -1.28 | down | 0.1529 | -1.87 | down | RluC\ Context:(NC_002946)-[1752736-1753728]\ Notes:Best Blastp Hit: pir   E81998 pseudouridylate synthase (EC 4.2.1.70) C rRNA-specific NMA0070 [imported] - Neisseria meningitidis (group A strain Z2491) >gi 7378843 emb CAB83386.1  (AL162752) ribosomal large subunit pseudouridine synthase C [Neisseria meningitidis] COG0564 Predicted pseudouridylate synthase family 2; putative ribosomal large subunit pseudouridine synthase C |
| NGO1784 | 0.0324 | -5.50 | down | 0.0350 | -7.88 | down | 0.8428 | -1.14 | down | hypothetical protein\ Context:(NC_002946)-[1753810-1754115]\ Notes:Best Blastp Hit: gb AAF40654.1  (AE002377) hypothetical protein [Neisseria meningitidis MC58]                                                                                                                                                                                                                                                                           |

|         |        |       |      |        |       |      |        |       |      |                                                                                                                                                                                                                                                                                                                                                                                                                                                                                                                       |
|---------|--------|-------|------|--------|-------|------|--------|-------|------|-----------------------------------------------------------------------------------------------------------------------------------------------------------------------------------------------------------------------------------------------------------------------------------------------------------------------------------------------------------------------------------------------------------------------------------------------------------------------------------------------------------------------|
| NGO1785 | 0.8604 | 1.08  | up   | 0.1731 | 2.15  | up   | 0.3808 | 1.72  | up   | Rne\ Context:(NC_002946)+[1754221-1756980]\<br>Notes:Best Blastp Hit: gb AAF40653.1  (AE002377)<br>ribonuclease E [Neisseria meningitidis MC58] COG1530<br>Ribonucleases G and E; putative ribonuclease E                                                                                                                                                                                                                                                                                                             |
| NGO1786 | 0.1278 | 3.12  | up   | 0.8284 | 1.17  | up   | 0.6961 | -1.28 | down | PdxA\ Context:(NC_002946)-[1757210-1758202]\<br>Notes:Best Blastp Hit: pir   H81227 pyridoxal phosphate<br>biosynthetic protein PdxA NMB0195 [imported] - Neisseria<br>meningitidis (group B strain MD58)<br>>gi 7225415 gb AAF40652.1  (AE002376) pyridoxal<br>phosphate biosynthetic protein PdxA [Neisseria<br>meningitidis MC58] COG1995 Pyridoxin biosynthesis<br>protein of unknown; putative pyridoxal phosphate<br>biosynthetic protein                                                                       |
| NGO1787 | 0.9749 | -1.02 | down | 0.3130 | -1.59 | down | 0.4244 | -1.25 | down | putative amino-acid transport protein\<br>Context:(NC_002946)+[1758361-1759788]\ Notes:Best<br>Blastp Hit: pir   G81227 probable amino-acid transport<br>protein NMA0073 [imported] - Neisseria meningitidis<br>(group B strain MD58; group A strain Z2491)<br>>gi 7225414 gb AAF40651.1  (AE002376) amino acid<br>symporter; putative [Neisseria meningitidis MC58]<br>>gi 7378846 emb CAB83389.1  (AL162752) putative<br>amino-acid transport protein [Neisseria meningitidis]<br>COG1115 Sodium-alanine symporters |
| NGO1788 | 0.3143 | -1.88 | down | 0.1792 | -2.25 | down | 0.9295 | 1.04  | up   | tRNA uridine 5-carboxymethylaminomethyl modification<br>enzyme GidA\ Context:(NC_002946)+[1759970-1761856]\<br>Notes:GidA; glucose-inhibited cell division protein A;<br>involved in the 5-carboxymethylaminomethyl modification<br>(mnm(5)s(2)U) of the wobble uridine base in some tRNAs                                                                                                                                                                                                                            |
| NGO1789 | 0.7804 | -1.18 | down | 0.0378 | -4.68 | down | 0.0856 | 3.42  | up   | hypothetical protein\ Context:(NC_002946)+[1761924-<br>1762508]\ Notes:Best Blastp Hit: pir   B81999 ribonuclease<br>H (EC 3.1.26.4) II NMA0075 [imported] - Neisseria<br>meningitidis (group A strain Z2491)<br>>gi 7378848 emb CAB83391.1  (AL162752) ribonuclease<br>HII [Neisseria meningitidis] COG0164 Ribonuclease HII                                                                                                                                                                                         |

|         |        |        |      |        |        |      |        |       |      |                                                                                                                                                                                                                                                                                                                                                                                                                                                                                                                                                                                                                                                           |
|---------|--------|--------|------|--------|--------|------|--------|-------|------|-----------------------------------------------------------------------------------------------------------------------------------------------------------------------------------------------------------------------------------------------------------------------------------------------------------------------------------------------------------------------------------------------------------------------------------------------------------------------------------------------------------------------------------------------------------------------------------------------------------------------------------------------------------|
| NGO1790 | 0.3733 | -1.47  | down | 0.4369 | -1.48  | down | 0.2440 | -2.01 | down | putative parA family protein - putative ATPase\<br>Context:(NC_002946)-[1763256-1764029]\ Notes:Best<br>Blastp Hit: pir    C81999 parA family protein NMA0076<br>[imported] - Neisseria meningitidis (group A strain Z2491)<br>>gi 7378849 emb CAB83392.1  (AL162752) parA family<br>protein [Neisseria meningitidis] COG1192 ATPases involved<br>in chromosome partitioning                                                                                                                                                                                                                                                                              |
| NGO1791 | 0.0116 | -4.96  | down | 0.0194 | -4.20  | down | 0.0568 | -2.20 | down | glucose-inhibited division protein B\<br>Context:(NC_002946)-<br>[1764129-1764752]\ Notes:probable SAM-dependent<br>methyltransferase                                                                                                                                                                                                                                                                                                                                                                                                                                                                                                                     |
| NGO1792 | 0.1886 | -2.52  | down | 0.0070 | -9.56  | down | 0.1353 | -2.75 | down | hypothetical protein\<br>Context:(NC_002946)-[1764847-<br>1765422]\ Notes:Best Blastp Hit: emb CAB83394.1 <br>(AL162752) putative integral membrane protein [Neisseria<br>meningitidis]                                                                                                                                                                                                                                                                                                                                                                                                                                                                   |
| NGO1793 | 0.0266 | -10.18 | down | 0.0917 | -16.66 | down | 0.4263 | -2.89 | down | hypothetical protein\<br>Context:(NC_002946)+[1765476-<br>1766705]\ Notes:Best Blastp Hit: gb AAF40645.1 <br>(AE002376) conserved hypothetical protein [Neisseria<br>meningitidis MC58]                                                                                                                                                                                                                                                                                                                                                                                                                                                                   |
| NGO1795 | 0.3548 | 1.53   | up   | 0.4088 | -1.63  | down | 0.9420 | 1.02  | up   | DcmB\<br>Context:(NC_002946)+[1767623-1768648]\<br>Notes:Best Blastp Hit: pir    CTNHP2 site-specific DNA-<br>methyltransferase (cytosine-specific) (EC 2.1.1.73) NgoPII -<br>Neisseria gonorrhoeae >gi 44873 emb CAA30038.1 <br>(X06965) NgoPII methylase (AA 1-341) [Neisseria<br>gonorrhoeae] >gi 44888 emb CAA36888.1  (X52661)<br>NgoPII restriction and modification [Neisseria gonorrhoeae]<br>>gi 293960 gb AAA17019.1  (L14564) cytosine methylase<br>[Neisseria gonorrhoeae] >gi 227054 prf   1613419B NgoPII<br>methylase [Neisseria gonorrhoeae] COG0270 Site-specific<br>DNA methylase dcm; site-specific DNA-methyltransferase<br>M. NgoPII |



|         |        |      |    |        |       |      |        |      |    |                                                                                                                                                                                                                                                                                                                                                                                                                                                                  |
|---------|--------|------|----|--------|-------|------|--------|------|----|------------------------------------------------------------------------------------------------------------------------------------------------------------------------------------------------------------------------------------------------------------------------------------------------------------------------------------------------------------------------------------------------------------------------------------------------------------------|
| NGO1796 | 0.4846 | 1.53 | up | 0.6768 | 1.18  | up   | 0.3822 | 1.33 | up | Rrf\ Context:(NC_002946)+[1768790-1769347]\ Notes:Best Blastp Hit: pir    D81229 ribosome recycling factor NMB0187 [imported] - Neisseria meningitidis (group B strain MD58; group A strain Z2491) >gi 7225406 gb AAF40644.1  (AE002375) ribosome recycling factor [Neisseria meningitidis MC58] >gi 7378853 emb CAB83396.1  (AL162752) ribosome recycling factor [Neisseria meningitidis] COG0233 Ribosome recycling factor; putative ribosome recycling factor |
| NGO1797 | 0.4013 | 1.53 | up | 0.8014 | 1.12  | up   | 0.8778 | 1.04 | up | putative undecaprenyl diphosphate synthase\ Context:(NC_002946)+[1769403-1770149]\ Notes:Best Blastp Hit: pir    C81229 undecaprenyl pyrophosphate synthetase NMB0186 [imported] - Neisseria meningitidis (group B strain MD58) >gi 7225405 gb AAF40643.1  (AE002375) undecaprenyl pyrophosphate synthetase [Neisseria meningitidis MC58] COG0020 Undecaprenyl pyrophosphate synthase                                                                            |
| NGO1798 | 0.7661 | 1.16 | up | 0.8797 | -1.07 | down | 0.9404 | 1.02 | up | putative phosphatidate cytidyltransferase\ Context:(NC_002946)+[1770152-1770949]\ Notes:Best Blastp Hit: pir    A82000 phosphatidate cytidyltransferase (EC 2.7.7.41) NMA0082 [imported] - Neisseria meningitidis (group A strain Z2491) >gi 7378855 emb CAB83398.1  (AL162752) phosphatidate cytidyltransferase [Neisseria meningitidis] COG0575 CDP-diglyceride synthetase                                                                                     |
| NGO1799 | 0.4083 | 1.43 | up | 0.9639 | 1.02  | up   | 0.8108 | 1.07 | up | 1-deoxy-D-xylulose 5-phosphate reductoisomerase\ Context:(NC_002946)+[1771005-1772189]\ Notes:catalyzes the NADP-dependent rearrangement and reduction of 1-deoxy-D-xylulose-5-phosphate (DXP) to 2-C-methyl-D-erythritol 4-phosphate                                                                                                                                                                                                                            |
| NGO1800 | 0.2928 | 1.72 | up | 0.0605 | 2.10  | up   | 0.2069 | 1.52 | up | hypothetical protein\ Context:(NC_002946)+[1772224-1773564]\ Notes:Best Blastp Hit: emb CAB83400.1  (AL162752) putative integral membrane protein [Neisseria meningitidis] COG0750 Predicted membrane-associated Zn-dependent                                                                                                                                                                                                                                    |

|         |        |       |      |        |       |      |        |       |      |                                                                                                                                                                                                                                                                                                                                                           |
|---------|--------|-------|------|--------|-------|------|--------|-------|------|-----------------------------------------------------------------------------------------------------------------------------------------------------------------------------------------------------------------------------------------------------------------------------------------------------------------------------------------------------------|
| NGO1801 | 0.2120 | 2.18  | up   | 0.1070 | 1.81  | up   | 0.1078 | 2.12  | up   | hypothetical protein\ Context:(NC_002946)+[1773621-1775999]\ Notes:Best Blastp Hit: gb AAC17600.1  (U81959) outer membrane protein [Neisseria gonorrhoeae] COG0729 Predicted outer membrane protein                                                                                                                                                       |
| NGO1802 | 0.0365 | 2.97  | up   | 0.0233 | 2.59  | up   | 0.0511 | 2.61  | up   | hypothetical protein\ Context:(NC_002946)+[1776008-1776565]\ Notes:Best Blastp Hit: gb AAF40638.1  (AE002375) outer membrane protein OmpH; putative [Neisseria meningitidis MC58]                                                                                                                                                                         |
| NGO1803 | 0.0382 | 3.11  | up   | 0.0395 | 3.30  | up   | 0.0557 | 2.53  | up   | UDP-3-O-[3-hydroxymyristoyl] glucosamine N-acyltransferase\ Context:(NC_002946)+[1776598-1777641]\ Notes:adds the O-linked and N-linked 3(R)-hydroxy fatty acids to the glucosamine disaccharide during lipid A biosynthesis                                                                                                                              |
| NGO1804 | 0.1170 | 2.46  | up   | 0.0685 | 3.94  | up   | 0.1531 | 1.96  | up   | (3R)-hydroxymyristoyl-ACP dehydratase\ Context:(NC_002946)+[1777677-1778126]\ Notes:in Pseudomonas aeruginosa this enzyme is a trimer of dimers; essential for membrane formation; performs third step of type II fatty acid biosynthesis; catalyzes dehydration of (3R)-hydroxyacyl-ACP to trans-2-acyl-ACP                                              |
| NGO1805 | 0.1499 | 2.31  | up   | 0.5650 | 1.48  | up   | 0.4428 | 1.60  | up   | hypothetical protein\ Context:(NC_002946)+[1778333-1779019]\ Notes:Best Blastp Hit: pir   H82000 hypothetical protein NMA0089 [imported] - Neisseria meningitidis (group A strain Z2491) >gi 7378862 emb CAB83405.1  (AL162752) hypothetical protein NMA0089 [Neisseria meningitidis]                                                                     |
| NGO1806 | 0.2283 | 1.83  | up   | 0.1850 | 2.64  | up   | 0.0886 | 1.83  | up   | UDP-N-acetylglucosamine acyltransferase\ Context:(NC_002946)+[1779062-1779838]\ Notes:catalyzes the addition of (R)-3-hydroxytetradecanoyl to the glucosamine disaccharide in lipid A biosynthesis                                                                                                                                                        |
| NGO1807 | 0.0051 | -6.60 | down | 0.0251 | -5.93 | down | 0.0054 | -4.20 | down | putative amino-acid transporter\ Context:(NC_002946)+[1780301-1781692]\ Notes:Best Blastp Hit: pir   B81228 sodium/alanine symporter; probable NMB0177 [imported] - Neisseria meningitidis (group B strain MD58) >gi 7225396 gb AAF40634.1  (AE002375) sodium/alanine symporter; putative [Neisseria meningitidis MC58] COG1115 Sodium-alanine symporters |

|         |        |       |      |        |        |      |        |       |      |                                                                                                                                                                                                                                                                                                                                                                                                                    |
|---------|--------|-------|------|--------|--------|------|--------|-------|------|--------------------------------------------------------------------------------------------------------------------------------------------------------------------------------------------------------------------------------------------------------------------------------------------------------------------------------------------------------------------------------------------------------------------|
| NGO1808 | 0.0088 | -8.19 | down | 0.0016 | -24.23 | down | 0.0778 | -5.66 | down | D-amino acid dehydrogenase small subunit\<br>Context:(NC_002946)+[1781771-1783030]\ Notes:catalyzes the oxidative deamination of D-amino acids                                                                                                                                                                                                                                                                     |
| NGO1809 | 0.5473 | 1.39  | up   | 0.6152 | 1.21   | up   | 0.1031 | 1.89  | up   | valyl-tRNA synthetase\<br>Context:(NC_002946)+[1783135-1785972]\ Notes:valine--tRNA ligase; ValRS; converts valine ATP and tRNA(Val) to AMP PPi and valyl-tRNA(Val); class-I aminoacyl-tRNA synthetase type 1 subfamily; has a posttransfer editing process to hydrolyze mischarged Thr-tRNA(Val) which is done by the editing domain                                                                              |
| NGO1810 | 0.2103 | 2.46  | up   | 0.7188 | 1.24   | up   | 0.4870 | 1.20  | up   | hypothetical protein\<br>Context:(NC_002946)+[1786049-1786513]\ Notes:                                                                                                                                                                                                                                                                                                                                             |
| NGO1811 | 0.9238 | -1.05 | down | 0.0276 | -2.77  | down | 0.8988 | -1.07 | down | tRNA pseudouridine synthase A\<br>Context:(NC_002946)+[1787384-1788181]\ Notes:mediates pseudouridylation (positions 38; 39; 40) at the tRNA anticodon region which contributes to the structural stability                                                                                                                                                                                                        |
| NGO1812 | 0.1549 | 2.54  | up   | 0.3736 | 1.34   | up   | 0.3485 | 1.49  | up   | major outer membrane protein porin P.IB\<br>Context:(NC_002946)+[1788698-1789744]\ Notes:Best Blastp Hit: gb AAC79472.1  (AF090803) outer membrane protein I precursor [Neisseria gonorrhoeae]; por                                                                                                                                                                                                                |
| NGO1813 | 0.1747 | 2.29  | up   | 0.1573 | 1.63   | up   | 0.9952 | 1.00  | up   | LysR family transcriptional regulator\<br>Context:(NC_002946)-[1790265-1791185]\ Notes:Best Blastp Hit: pir    H82001 probable hydrogen peroxide-inducible genes activator NMA0098 [imported] - Neisseria meningitidis (group A strain Z2491) >gi 7378870 emb CAB83413.1  (AL162752) putative hydrogen peroxide-inducible genes activator [Neisseria meningitidis] COG0583 Transcriptional regulators; LysR family |
| NGO1814 | 0.3805 | 1.68  | up   | 0.8092 | 1.09   | up   | 0.5239 | 1.28  | up   | hypothetical protein\<br>Context:(NC_002946)-[1791189-1791452]\ Notes:Best Blastp Hit: emb CAB83414.1  (AL162752) putative cell division topological specificity factor [Neisseria meningitidis] COG0851 Bacterial cell division topological                                                                                                                                                                       |
| NGO1816 | 0.9561 | 1.03  | up   | 0.6394 | -1.22  | down | 0.5326 | -1.21 | down | septum formation inhibitor\<br>Context:(NC_002946)-[1792300-1793013]\ Notes:blocks the formation of polar Z-ring septums                                                                                                                                                                                                                                                                                           |

|              |        |      |    |        |      |    |        |      |    |                                                                                                                                                                                                                                                                                                                                                                                                                                           |
|--------------|--------|------|----|--------|------|----|--------|------|----|-------------------------------------------------------------------------------------------------------------------------------------------------------------------------------------------------------------------------------------------------------------------------------------------------------------------------------------------------------------------------------------------------------------------------------------------|
| NGO1817      | 0.2768 | 1.93 | up | 0.4270 | 1.30 | up | 0.4411 | 1.24 | up | 50S ribosomal protein L17\ Context:(NC_002946)-[1793160-1793528]\ Notes:is a component of the macrolide binding site in the peptidyl transferase center                                                                                                                                                                                                                                                                                   |
| NGO1818      | 0.1296 | 2.42 | up | 0.2757 | 1.44 | up | 0.2972 | 1.39 | up | DNA-directed RNA polymerase subunit alpha\ Context:(NC_002946)-[1793552-1794538]\ Notes:catalyzes the transcription of DNA into RNA using the four ribonucleoside triphosphates as substrates. Dimerization of the alpha subunit is the first step in the sequential assembly of subunits to form the holoenzyme                                                                                                                          |
| NGO1819      | 0.1631 | 2.52 | up | 0.3555 | 1.41 | up | 0.1910 | 1.63 | up | 30S ribosomal protein S4\ Context:(NC_002946)-[1794564-1795184]\ Notes:primary rRNA binding protein; nucleates 30S assembly; involved in translational accuracy with proteins S5 and S12; interacts with protein S5; involved in autogeneously regulating ribosomal proteins by binding to pseudoknot structures in the polycistronic mRNA; interacts with transcription complex and functions similar to protein NusA in antitermination |
| NGO1820      | 0.0866 | 3.07 | up | 0.1974 | 1.58 | up | 0.2033 | 1.61 | up | 30S ribosomal protein S11\ Context:(NC_002946)-[1795204-1795599]\ Notes:located on the platform of the 30S subunit; it bridges several disparate RNA helices of the 16S rRNA; forms part of the Shine-Dalgarno cleft in the 70S ribosome; interacts with S7 and S18 and IF-3                                                                                                                                                              |
| NGO1821      | 0.1005 | 2.96 | up | 0.2158 | 1.56 | up | 0.2163 | 1.57 | up | 30S ribosomal protein S13\ Context:(NC_002946)-[1795619-1795981]\ Notes:located at the top of the head of the 30S subunit; it contacts several helices of the 16S rRNA; makes contact with the large subunit via RNA-protein interactions and via protein-protein interactions with L5; contacts P-site tRNA                                                                                                                              |
| NGO1821<br>1 | 0.0921 | 2.59 | up | 0.2016 | 1.61 | up | 0.3547 | 1.34 | up | translation initiation factor IF-1\ Context:(NC_002946)-[1796181-1796399]\ Notes:stimulates the activities of the other two initiation factors; IF-2 and IF-3                                                                                                                                                                                                                                                                             |

|              |        |      |    |        |      |    |        |      |    |                                                                                                                                                                                                                                                                                                                                                                                                                                                                                                                                                          |
|--------------|--------|------|----|--------|------|----|--------|------|----|----------------------------------------------------------------------------------------------------------------------------------------------------------------------------------------------------------------------------------------------------------------------------------------------------------------------------------------------------------------------------------------------------------------------------------------------------------------------------------------------------------------------------------------------------------|
| NGO1822      | 0.2411 | 2.08 | up | 0.3337 | 1.47 | up | 0.4299 | 1.28 | up | preprotein translocase subunit SecY\ Context:(NC_002946)-[1796404-1797714]\ Notes:forms heterotrimeric complex in the membrane; in bacteria the complex consists of SecY which forms the channel pore and SecE and SecG; the SecG subunit is not essential; in bacteria translocation is driven via the SecA ATPase                                                                                                                                                                                                                                      |
| NGO1823      | 0.1326 | 2.64 | up | 0.3960 | 1.37 | up | 0.3309 | 1.39 | up | 50S ribosomal protein L15\ Context:(NC_002946)-[1797726-1798160]\ Notes:late assembly protein                                                                                                                                                                                                                                                                                                                                                                                                                                                            |
| NGO1823<br>1 | 0.0872 | 2.91 | up | 0.3189 | 1.44 | up | 0.3385 | 1.36 | up | 50S ribosomal protein L30\ Context:(NC_002946)-[1798162-1798347]\ Notes:L30 binds domain II of the 23S rRNA and the 5S rRNA; similar to eukaryotic protein L7                                                                                                                                                                                                                                                                                                                                                                                            |
| NGO1824      | 0.0927 | 2.78 | up | 0.3263 | 1.45 | up | 0.4242 | 1.30 | up | 30S ribosomal protein S5\ Context:(NC_002946)-[1798340-1798858]\ Notes:located at the back of the 30S subunit body where it stabilizes the conformation of the head with respect to the body; contacts S4 and S8; with S4 and S12 plays a role in translational accuracy; mutations in this gene result in spectinomycin resistance                                                                                                                                                                                                                      |
| NGO1824<br>1 | 0.0887 | 3.08 | up | 0.2855 | 1.49 | up | 0.2568 | 1.52 | up | 50S ribosomal protein L18\ Context:(NC_002946)-[1798877-1799230]\ Notes:binds 5S rRNA along with protein L5 and L25                                                                                                                                                                                                                                                                                                                                                                                                                                      |
| NGO1825      | 0.0805 | 3.15 | up | 0.2419 | 1.57 | up | 0.2614 | 1.47 | up | 50S ribosomal protein L6\ Context:(NC_002946)-[1799244-1799777]\ Notes:ribosomal protein L6 appears to have arisen as a result of an ancient gene duplication as based on structural comparison of the Bacillus stearothermophilus protein; RNA-binding appears to be in the C-terminal domain; mutations in the L6 gene confer resistance to aminoglycoside antibiotics such as gentamicin and these occur in truncations of the C-terminal domain; it has been localized to a region between the base of the L7/L12 stalk and the central protuberance |
| NGO1826      | 0.0846 | 3.11 | up | 0.3259 | 1.45 | up | 0.1658 | 1.65 | up | 30S ribosomal protein S8\ Context:(NC_002946)-[1799791-1800183]\ Notes:binds directly to 16S rRNA central domain where it helps coordinate assembly of the platform of the 30S subunit                                                                                                                                                                                                                                                                                                                                                                   |

|              |        |      |    |        |      |    |        |      |    |                                                                                                                                                                                                                                                                                                                                                                                                                                                                                                                                       |
|--------------|--------|------|----|--------|------|----|--------|------|----|---------------------------------------------------------------------------------------------------------------------------------------------------------------------------------------------------------------------------------------------------------------------------------------------------------------------------------------------------------------------------------------------------------------------------------------------------------------------------------------------------------------------------------------|
| NGO1826<br>1 | 0.0945 | 3.02 | up | 0.3458 | 1.40 | up | 0.2914 | 1.42 | up | 30S ribosomal protein S14\ Context:(NC_002946)-[1800199-1800504]\ Notes:located in the peptidyl transferase center and involved in assembly of 30S ribosome subunit; similar to what is observed with proteins L31 and L33; some proteins in this family contain CXXC motifs that are involved in zinc binding; if two copies are present in a genome; then the duplicated copy appears to have lost the zinc-binding motif and is instead regulated by zinc; the proteins in this group do not appear to have the zinc-binding motif |
| NGO1827      | 0.1440 | 2.70 | up | 0.2727 | 1.49 | up | 0.3091 | 1.43 | up | 50S ribosomal protein L5\ Context:(NC_002946)-[1800507-1801046]\ Notes:part of 50S and 5S/L5/L18/L25 subcomplex; contacts 5S rRNA and P site tRNA; forms a bridge to the 30S subunit in the ribosome by binding to S13                                                                                                                                                                                                                                                                                                                |
| NGO1828      | 0.1390 | 2.69 | up | 0.3216 | 1.45 | up | 0.2768 | 1.47 | up | 50S ribosomal protein L24\ Context:(NC_002946)-[1801056-1801379]\ Notes:assembly initiator protein; binds to 5' end of 23S rRNA and nucleates assembly of the 50S; surrounds polypeptide exit tunnel                                                                                                                                                                                                                                                                                                                                  |
| NGO1829      | 0.1216 | 2.85 | up | 0.2794 | 1.49 | up | 0.3011 | 1.42 | up | 50S ribosomal protein L14\ Context:(NC_002946)-[1801391-1801759]\ Notes:binds to the 23S rRNA between the centers for peptidyl transferase and GTPase                                                                                                                                                                                                                                                                                                                                                                                 |
| NGO1830      | 0.1146 | 2.95 | up | 0.3036 | 1.46 | up | 0.0874 | 1.91 | up | 30S ribosomal protein S17\ Context:(NC_002946)-[1801981-1802244]\ Notes:primary binding protein; helps mediate assembly; involved in translation fidelity                                                                                                                                                                                                                                                                                                                                                                             |
| NGO1831      | 0.0824 | 3.25 | up | 0.1744 | 1.62 | up | 0.1359 | 1.70 | up | 50S ribosomal protein L29\ Context:(NC_002946)-[1802244-1802435]\ Notes:one of the stabilizing components for the large ribosomal subunit                                                                                                                                                                                                                                                                                                                                                                                             |
| NGO1831<br>1 | 0.0790 | 3.02 | up | 0.2552 | 1.48 | up | 0.1022 | 1.86 | up | 50S ribosomal protein L16\ Context:(NC_002946)-[1802435-1802851]\ Notes:located in the peptidyl transferase center and may be involved in peptidyl transferase activity; similar to archaeal L10e                                                                                                                                                                                                                                                                                                                                     |
| NGO1832      | 0.0698 | 3.17 | up | 0.1844 | 1.62 | up | 0.1436 | 1.69 | up | 30S ribosomal protein S3\ Context:(NC_002946)-[1802835-1803527]\ Notes:forms a complex with S10 and S14; binds the lower part of the 30S subunit head and the mRNA in the complete ribosome to position it for translation                                                                                                                                                                                                                                                                                                            |

|         |        |      |    |        |       |      |        |       |      |                                                                                                                                                                                                                                                                                                                                                |
|---------|--------|------|----|--------|-------|------|--------|-------|------|------------------------------------------------------------------------------------------------------------------------------------------------------------------------------------------------------------------------------------------------------------------------------------------------------------------------------------------------|
| NGO1833 | 0.0322 | 4.00 | up | 0.5081 | 1.36  | up   | 0.1017 | 1.71  | up   | 50S ribosomal protein L22\ Context:(NC_002946)-[1803537-1803866]\ Notes:binds specifically to 23S rRNA during the early stages of 50S assembly; makes contact with all 6 domains of the 23S rRNA in the assembled 50S subunit and ribosome; mutations in this gene result in erythromycin resistance; located near peptidyl-transferase center |
| NGO1834 | 0.0718 | 3.27 | up | 0.1557 | 1.74  | up   | 0.1898 | 1.56  | up   | 30S ribosomal protein S19\ Context:(NC_002946)-[1803875-1804153]\ Notes:protein S19 forms a complex with S13 that binds strongly to the 16S ribosomal RNA                                                                                                                                                                                      |
| NGO1835 | 0.0788 | 3.23 | up | 0.2097 | 1.59  | up   | 0.1138 | 1.81  | up   | 50S ribosomal protein L2\ Context:(NC_002946)-[1804159-1804992]\ Notes:one of the primary rRNA-binding proteins; required for association of the 30S and 50S subunits to form the 70S ribosome; for tRNA binding and peptide bond formation                                                                                                    |
| NGO1836 | 0.0842 | 2.96 | up | 0.1769 | 1.69  | up   | 0.1722 | 1.60  | up   | 50S ribosomal protein L23\ Context:(NC_002946)-[1804998-1805318]\ Notes:binds third domain of 23S rRNA and protein L29; part of exit tunnel                                                                                                                                                                                                    |
| NGO1837 | 0.0766 | 2.97 | up | 0.1807 | 1.70  | up   | 0.2132 | 1.50  | up   | 50S ribosomal protein L4\ Context:(NC_002946)-[1805309-1805929]\ Notes:L4 is important during the early stages of 50S assembly; it initially binds near the 5' end of the 23S rRNA                                                                                                                                                             |
| NGO1838 | 0.1290 | 2.80 | up | 0.1672 | 1.66  | up   | 0.1060 | 1.98  | up   | 50S ribosomal protein L3\ Context:(NC_002946)-[1805929-1806573]\ Notes:binds directly near the 3' end of the 23S rRNA; where it nucleates assembly of the 50S subunit; essential for peptidyltransferase activity; mutations in this gene confer resistance to tiamulin                                                                        |
| NGO1839 | 0.6487 | 1.41 | up | 0.4473 | -1.95 | down | 0.9290 | -1.06 | down | hypothetical protein\ Context:(NC_002946)-[1806791-1806982]\ Notes:Best Blastp Hit: emb CAB83446.1  (AL162752) hypothetical protein NMA0132 [Neisseria meningitidis]                                                                                                                                                                           |

|         |        |        |      |        |        |      |        |       |      |                                                                                                                                                                                                                                                                                                                                                                                                                                                                                           |
|---------|--------|--------|------|--------|--------|------|--------|-------|------|-------------------------------------------------------------------------------------------------------------------------------------------------------------------------------------------------------------------------------------------------------------------------------------------------------------------------------------------------------------------------------------------------------------------------------------------------------------------------------------------|
| NGO1841 | 0.1097 | 3.03   | up   | 0.0842 | 1.96   | up   | 0.0729 | 2.17  | up   | 30S ribosomal protein S10\ Context:(NC_002946)-[1807359-1807670]\ Notes:NusE; involved in assembly of the 30S subunit; in the ribosome; this protein is involved in the binding of tRNA; in Escherichia coli this protein was also found to be involved in transcription antitermination; NusB/S10 heterodimers bind boxA sequences in the leader RNA of rrn operons which is required for antitermination; binding of NusB/S10 to boxA nucleates assembly of the antitermination complex |
| NGO1843 | 0.1149 | 2.65   | up   | 0.1298 | 1.96   | up   | 0.0751 | 1.94  | up   | elongation factor G\ Context:(NC_002946)-[1808960-1811065]\ Notes:EF-G; promotes GTP-dependent translocation of the ribosome during translation; many organisms have multiple copies of this gene                                                                                                                                                                                                                                                                                         |
| NGO1844 | 0.0789 | 3.12   | up   | 0.3846 | 1.36   | up   | 0.2423 | 1.49  | up   | 30S ribosomal protein S7\ Context:(NC_002946)-[1811084-1811554]\ Notes:binds directly to 16S rRNA where it nucleates assembly of the head domain of the 30S subunit                                                                                                                                                                                                                                                                                                                       |
| NGO1845 | 0.0903 | 2.95   | up   | 0.3400 | 1.41   | up   | 0.3548 | 1.38  | up   | 30S ribosomal protein S12\ Context:(NC_002946)-[1811672-1812043]\ Notes:interacts with and stabilizes bases of the 16S rRNA that are involved in tRNA selection in the A site and with the mRNA backbone; located at the interface of the 30S and 50S subunits; it traverses the body of the 30S subunit contacting proteins on the other side; mutations in the S12 gene confer streptomycin resistance                                                                                  |
| NGO1846 | 0.0115 | -12.77 | down | 0.0008 | -31.40 | down | 0.0691 | -6.14 | down | hypothetical protein\ Context:(NC_002946)-[1812222-1812371]\ Notes:Best Blastp Hit: emb CAB83453.1  (AL162752) hypothetical protein NMA0138 [Neisseria meningitidis]                                                                                                                                                                                                                                                                                                                      |
| NGO1847 | 0.2672 | -2.23  | down | 0.0046 | -16.84 | down | 0.2159 | -3.43 | down | hypothetical protein\ Context:(NC_002946)-[1812378-1813307]\ Notes:Best Blastp Hit: gb AAF41823.1  (AE002496) conserved hypothetical protein [Neisseria meningitidis MC58]                                                                                                                                                                                                                                                                                                                |
| NGO1848 | 0.5314 | -1.38  | down | 0.0945 | -5.91  | down | 0.6454 | -1.54 | down | hypothetical protein\ Context:(NC_002946)-[1813279-1813521]\ Notes:Best Blastp Hit: gb AAF40593.1  (AE002372) hypothetical protein [Neisseria meningitidis MC58]                                                                                                                                                                                                                                                                                                                          |



|         |        |        |      |        |        |      |        |        |      |                                                                                                                                                                                                                                                                                                                                                                                      |
|---------|--------|--------|------|--------|--------|------|--------|--------|------|--------------------------------------------------------------------------------------------------------------------------------------------------------------------------------------------------------------------------------------------------------------------------------------------------------------------------------------------------------------------------------------|
| NGO1849 | 0.0013 | -15.59 | down | 0.0011 | -13.64 | down | 0.0039 | -13.67 | down | hypothetical protein\ Context:(NC_002946)-[1813761-1814822]\ Notes:Best Blastp Hit: possibly phase variable - 8G residue homopolymer repeat in the coding sequence (ON)                                                                                                                                                                                                              |
| NGO1850 | 0.0264 | 3.88   | up   | 0.0308 | 4.23   | up   | 0.0747 | 2.36   | up   | DNA-directed RNA polymerase subunit beta'\ Context:(NC_002946)-[1815110-1819285]\ Notes:DNA-dependent RNA polymerase catalyzes the transcription of DNA into RNA using the four ribonucleoside triphosphates as substrates. Subunit beta' binds to sigma factor allowing it to bind to the -10 region of the promoter                                                                |
| NGO1851 | 0.0496 | 2.99   | up   | 0.0205 | 3.15   | up   | 0.0701 | 2.03   | up   | DNA-directed RNA polymerase subunit beta'\ Context:(NC_002946)-[1819438-1823616]\ Notes:DNA-dependent RNA polymerase catalyzes the transcription of DNA into RNA using the four ribonucleoside triphosphates as substrates; beta subunit is part of the catalytic core which binds with a sigma factor to produce the holoenzyme                                                     |
| NGO1852 | 0.1350 | 2.50   | up   | 0.4554 | 1.30   | up   | 0.3596 | 1.49   | up   | 50S ribosomal protein L7/L12\ Context:(NC_002946)-[1823807-1824178]\ Notes:present in two forms; L12 is normal; while L7 is aminoacylated at the N-terminal serine; the only multicopy ribosomal protein; 4:1 ratio of L7/L12 per ribosome; two L12 dimers bind L10; critically important for translation efficiency and fidelity; stimulates GTPase activity of translation factors |
| NGO1853 | 0.1397 | 2.52   | up   | 0.4756 | 1.29   | up   | 0.4447 | 1.32   | up   | 50S ribosomal protein L10\ Context:(NC_002946)-[1824236-1824736]\ Notes:binds the two ribosomal protein L7/L12 dimers and anchors them to the large ribosomal subunit                                                                                                                                                                                                                |
| NGO1854 | 0.2334 | 2.02   | up   | 0.6453 | 1.17   | up   | 0.6818 | 1.14   | up   | 50S ribosomal protein L1\ Context:(NC_002946)-[1824964-1825659]\ Notes:in Escherichia coli and Methanococcus; this protein autoregulates expression; the binding site in the mRNA mimics the binding site in the 23S rRNA                                                                                                                                                            |
| NGO1855 | 0.2727 | 2.00   | up   | 0.6165 | 1.19   | up   | 0.5398 | 1.26   | up   | 50S ribosomal protein L11\ Context:(NC_002946)-[1825659-1826093]\ Notes:binds directly to 23S ribosomal RNA                                                                                                                                                                                                                                                                          |

|         |        |       |      |        |       |      |        |       |      |                                                                                                                                                                                                                                                                                                                                    |
|---------|--------|-------|------|--------|-------|------|--------|-------|------|------------------------------------------------------------------------------------------------------------------------------------------------------------------------------------------------------------------------------------------------------------------------------------------------------------------------------------|
| NGO1856 | 0.0882 | 2.87  | up   | 0.1612 | 1.68  | up   | 0.2799 | 1.39  | up   | transcription antitermination protein NusG\<br>Context:(NC_002946)-[1826194-1826730]\                                                                                                                                                                                                                                              |
| NGO1857 | 0.0802 | 3.85  | up   | 0.0805 | 1.94  | up   | 0.2099 | 1.45  | up   | preprotein translocase subunit SecE\<br>Context:(NC_002946)-[1826732-1827010]\ Notes:forms a complex with SecY and SecG; SecYEG forms a putative protein-conducting channel to which secA binds and translocates targeted polypeptides across the cytoplasmic membrane; a process driven by ATP and a proton-motive force          |
| NGO1859 | 0.9639 | 1.02  | up   | 0.2575 | -2.04 | down | 0.1780 | -2.08 | down | putative ferredoxin\<br>Context:(NC_002946)-[1828808-1829059]\ Notes:Best Blastp Hit: pir   H81234 ferredoxin; 4Fe-4S bacterial type NMB0123 [imported] - Neisseria meningitidis (group B strain MD58) >gi 7225340 gb AAF40582.1   (AE002371) ferredoxin; 4Fe-4S bacterial type [Neisseria meningitidis MC58] COG1145 Ferredoxin 2 |
| NGO1860 | 0.7606 | 1.18  | up   | 0.9929 | -1.00 | down | 0.8235 | -1.07 | down | putative DNA methylase\<br>Context:(NC_002946)-[1829182-1829751]\ Notes:Best Blastp Hit: emb CAB83466.1   (AL162752) possible DNA methylase [Neisseria meningitidis] COG0742 N6-adenine-specific methylase                                                                                                                         |
| NGO1861 | 0.0033 | -7.70 | down | 0.7545 | -1.21 | down | 0.7009 | 1.37  | up   | hypothetical protein\<br>Context:(NC_002946)-[1829854-1830192]\ Notes:Best Blastp Hit: pir   F82008 hypothetical protein NMA0153 [imported] - Neisseria meningitidis (group A strain Z2491) >gi 7378924 emb CAB83467.1   (AL162752) hypothetical protein NMA0153 [Neisseria meningitidis]                                          |
| NGO1863 | 0.3573 | 1.57  | up   | 0.0846 | 2.06  | up   | 0.0601 | 1.89  | up   | DNA topoisomerase I\<br>Context:(NC_002946)-[1832027-1834333]\ Notes:catalyzes the ATP-dependent breakage of single-stranded DNA followed by passage and rejoining; maintains net negative superhelicity                                                                                                                           |
| NGO1864 | 0.4737 | -1.39 | down | 0.4224 | -1.47 | down | 0.4186 | -1.29 | down | hypothetical protein\<br>Context:(NC_002946)-[1834411-1834872]\ Notes:Best Blastp Hit: gb AAF40576.1   (AE002370) smg protein; putative [Neisseria meningitidis MC58] >gi 7378928 emb CAB83471.1   (AL162752) hypothetical protein NMA0157 [Neisseria meningitidis]                                                                |

|         |        |      |    |        |       |      |        |       |      |                                                                                                                                                                                                                                                                                                                                                     |
|---------|--------|------|----|--------|-------|------|--------|-------|------|-----------------------------------------------------------------------------------------------------------------------------------------------------------------------------------------------------------------------------------------------------------------------------------------------------------------------------------------------------|
| NGO1865 | 0.7091 | 1.20 | up | 0.8693 | -1.08 | down | 0.8096 | -1.07 | down | hypothetical protein\ Context:(NC_002946)-[1834898-1836085]\ Notes:Best Blastp Hit: pir     C82009 DprA homolog NMA0158 [imported] - Neisseria meningitidis (group A strain Z2491) >gi 7378929 emb CAB83472.1  (AL162752) DprA homolog [Neisseria meningitidis] COG0758 protein involved in DNA uptake                                              |
| NGO1866 | 0.4259 | 1.44 | up | 0.8807 | 1.07  | up   | 0.9140 | -1.04 | down | putative two-component system transcriptional response regulator\ Context:(NC_002946)-[1836176-1837453]\ Notes:Best Blastp Hit: gb AAF40574.1  (AE002370) nitrogen assimilation regulatory protein NtrX [Neisseria meningitidis MC58] COG2204 AAA superfamily ATPases with N-terminal                                                               |
| NGO1867 | 0.3836 | 1.65 | up | 0.3918 | 1.66  | up   | 0.3328 | 1.32  | up   | putative two-component system sensor kinase\ Context:(NC_002946)-[1837446-1839566]\ Notes:Best Blastp Hit: emb CAB83474.1  (AL162752) putative two-component sensor [Neisseria meningitidis] COG0642 Sensory transduction histidine kinases                                                                                                         |
| NGO1868 | 0.3382 | 1.65 | up | 0.4623 | 1.36  | up   | 0.3416 | 1.32  | up   | hypothetical protein\ Context:(NC_002946)-[1839566-1840165]\ Notes:Best Blastp Hit: pir     F82009 hypothetical protein NMA0161 [imported] - Neisseria meningitidis (group A strain Z2491) >gi 7378932 emb CAB83475.1  (AL162752) hypothetical protein NMA0161 [Neisseria meningitidis]                                                             |
| NGO1869 | 0.0821 | 2.27 | up | 0.6920 | 1.19  | up   | 0.1919 | 1.44  | up   | putative 16S RNA methyltransferase\ Context:(NC_002946)-[1840131-1841390]\ Notes:Best Blastp Hit: emb CAB83476.1  (AL162752) SUN homolog [Neisseria meningitidis] COG0144 Predicted rRNA methylase                                                                                                                                                  |
| NGO1870 | 0.0999 | 2.13 | up | 0.6446 | 1.28  | up   | 0.5736 | 1.17  | up   | hypothetical protein\ Context:(NC_002946)-[1841469-1842395]\ Notes:Best Blastp Hit: pir     F81238 methionyl-tRNA formyltransferase NMB0111 [imported] - Neisseria meningitidis (group B strain MD58) >gi 7225326 gb AAF40570.1  (AE002369) methionyl-tRNA formyltransferase [Neisseria meningitidis MC58] COG0223 Methionyl-tRNA formyltransferase |
| NGO1871 | 0.1973 | 2.18 | up | 0.3137 | 1.45  | up   | 0.3929 | 1.43  | up   | peptide deformylase\ Context:(NC_002946)-[1842483-1842986]\ Notes:cleaves off formyl group from N-terminal methionine residues of newly synthesized proteins; binds iron(2+)                                                                                                                                                                        |

|              |        |       |      |        |        |      |        |       |      |                                                                                                                                                                                                                                                                                                                            |
|--------------|--------|-------|------|--------|--------|------|--------|-------|------|----------------------------------------------------------------------------------------------------------------------------------------------------------------------------------------------------------------------------------------------------------------------------------------------------------------------------|
| NGO1872      | 0.1440 | 2.53  | up   | 0.1674 | 1.67   | up   | 0.0822 | 2.03  | up   | hypothetical protein\ Context:(NC_002946)-[1843059-1843256]\ Notes:                                                                                                                                                                                                                                                        |
| NGO1873      | 0.2318 | 2.13  | up   | 0.0801 | 1.93   | up   | 0.2559 | 1.65  | up   | hypothetical protein\ Context:(NC_002946)+[1843284-1844621]\ Notes:Best Blastp Hit: pir   D81238 hypothetical protein NMB0109 - Neisseria meningitidis (group B strain MD58) >gi 7225324 gb AAF40568.1  (AE002369) conserved hypothetical protein [Neisseria meningitidis MC58] COG1652 Uncharacterized BCR                |
| NGO1874      | 0.0612 | -4.17 | down | 0.0074 | -52.58 | down | 0.4482 | 1.51  | up   | hypothetical protein\ Context:(NC_002946)+[1844694-1844858]\ Notes:Best Blastp Hit: gb AAA96487.1  (L36381) putative [Neisseria gonorrhoeae]                                                                                                                                                                               |
| NGO1875      | 0.4075 | 1.49  | up   | 0.1128 | 1.99   | up   | 0.8568 | 1.06  | up   | hypothetical protein\ Context:(NC_002946)-[1845042-1845692]\ Notes:Best Blastp Hit: pir   C82010 probable integral membrane protein NMA0166 [imported] - Neisseria meningitidis (group A strain Z2491) >gi 7378937 emb CAB83480.1  (AL162752) putative integral membrane protein [Neisseria meningitidis]                  |
| NGO1876      | 0.1921 | 1.92  | up   | 0.4593 | 1.32   | up   | 0.9395 | -1.02 | down | aspartate carbamoyltransferase regulatory subunit\ Context:(NC_002946)-[1845754-1846212]\ Notes:involved in the allosteric regulation of aspartate carbamoyltransferase                                                                                                                                                    |
| NGO1877      | 0.6707 | 1.21  | up   | 0.8739 | -1.08  | down | 0.4624 | -1.44 | down | aspartate carbamoyltransferase catalytic subunit\ Context:(NC_002946)-[1846222-1847142]\ Notes:catalyzes the transfer of the carbamoyl moiety from carbamoyl phosphate to L- aspartate in pyrimidine biosynthesis                                                                                                          |
| NGO1878      | 0.1575 | -2.15 | down | 0.5849 | -1.27  | down | 0.1068 | -1.73 | down | hypothetical protein\ Context:(NC_002946)+[1847378-1848220]\ Notes:Best Blastp Hit: pir   F82010 hypothetical protein NMA0169 [imported] - Neisseria meningitidis (group A strain Z2491) >gi 7378940 emb CAB83483.1  (AL162752) hypothetical protein NMA0169 [Neisseria meningitidis] COG0454 Predicted acetyltransferases |
| NGO1878<br>1 | 0.5895 | -2.58 | down | 0.3350 | 6.58   | up   | 0.6964 | 2.52  | up   | hypothetical protein\ Context:(NC_002946)+[1848738-1848974]\ Notes:Best Blastp Hit: possibly phase variable - 8T residue homopolymer repeat in the coding sequence (ON)                                                                                                                                                    |

|         |        |       |      |        |        |      |        |       |      |                                                                                                                                                                                                                                                                                                                                                                         |
|---------|--------|-------|------|--------|--------|------|--------|-------|------|-------------------------------------------------------------------------------------------------------------------------------------------------------------------------------------------------------------------------------------------------------------------------------------------------------------------------------------------------------------------------|
| NGO1879 | 0.1089 | 5.62  | up   | 0.7348 | 1.56   | up   | 0.8984 | -1.10 | down | hypothetical protein\ Context:(NC_002946)+[1849022-1849612]\ Notes:Best Blastp Hit: gb AAF40562.1  (AE002369) bacteriocin resistance protein; putative [Neisseria meningitidis MC58]<br>>gi 7378945 emb CAB83488.1  (AL162752) hypothetical protein NMA0173 [Neisseria meningitidis] COG1101 ATPase components of various transport                                     |
| NGO1880 | 0.6307 | 1.28  | up   | 0.9291 | -1.04  | down | 0.9911 | -1.00 | down | hypothetical protein\ Context:(NC_002946)-[1849888-1850439]\ Notes:Best Blastp Hit: pir   D82011 probable integral membrane protein NMA0174 [imported] - Neisseria meningitidis (group A strain Z2491)<br>>gi 7378946 emb CAB83489.1  (AL162752) putative integral membrane protein [Neisseria meningitidis]                                                            |
| NGO1881 | 0.0033 | 6.18  | up   | 0.0312 | 3.86   | up   | 0.0224 | 2.55  | up   | PykA\ Context:(NC_002946)+[1851528-1853000]\ Notes:Best Blastp Hit: pir   B81239 pyruvate kinase II NMB0089 [imported] - Neisseria meningitidis (group B strain MD58) >gi 7225307 gb AAF40552.1  (AE002368) pyruvate kinase II [Neisseria meningitidis MC58] COG0469 Pyruvate kinase; putative pyruvate kinase                                                          |
| NGO1886 | 0.2748 | -3.10 | down | 0.0010 | -32.15 | down | 0.6057 | -1.72 | down | hypothetical protein\ Context:(NC_002946)-[1854669-1855091]\ Notes:Best Blastp Hit: emb CAB83494.1  (AL162752) hypothetical protein NMA0179 [Neisseria meningitidis]                                                                                                                                                                                                    |
| NGO1887 | 0.0032 | -7.65 | down | 0.2289 | -3.64  | down | 0.9723 | -1.02 | down | hypothetical protein\ Context:(NC_002946)-[1855269-1855418]\ Notes:Best Blastp Hit: pir   G81075 hypothetical protein NMB1507 [imported] - Neisseria meningitidis (group B strain MD58)<br>>gi 4582968 gb AAD24874.1 AF073777_2 (AF073777) unknown [Neisseria meningitidis]<br>>gi 7226750 gb AAF41863.1  (AE002500) hypothetical protein [Neisseria meningitidis MC58] |
| NGO1888 | 0.1307 | -4.26 | down | 0.0796 | -3.38  | down | 0.1996 | -2.12 | down | hypothetical protein\ Context:(NC_002946)-[1855436-1855633]\ Notes:Best Blastp Hit: gb AAF40550.1  (AE002368) hypothetical protein [Neisseria meningitidis MC58] >gi 7378953 emb CAB83496.1  (AL162752) hypothetical protein NMA0181 [Neisseria meningitidis]                                                                                                           |

|         |        |       |      |        |       |      |        |       |      |                                                                                                                                                                                                                                                                                                                                                                                                                                          |
|---------|--------|-------|------|--------|-------|------|--------|-------|------|------------------------------------------------------------------------------------------------------------------------------------------------------------------------------------------------------------------------------------------------------------------------------------------------------------------------------------------------------------------------------------------------------------------------------------------|
| NGO1889 | 0.6236 | -1.36 | down | 0.0622 | -2.75 | down | 0.0688 | -2.40 | down | hypothetical protein\ Context:(NC_002946)-[1855643-1856659]\ Notes:Best Blastp Hit: pir   G81238 hypothetical protein NMB0086 [imported] - Neisseria meningitidis (group B strain MD58) >gi 7225304 gb AAF40549.1  (AE002368) hypothetical protein [Neisseria meningitidis MC58]                                                                                                                                                         |
| NGO1890 | 0.9515 | -1.04 | down | 0.3843 | 1.58  | up   | 0.7956 | 1.11  | up   | GltS\ Context:(NC_002946)-[1856758-1857972]\ Notes:Best Blastp Hit: pir   F81240 sodium/glutamate symporter NMB0085 [imported] - Neisseria meningitidis (group B strain MD58) >gi 7225302 gb AAF40548.1  (AE002367) sodium/glutamate symporter [Neisseria meningitidis MC58] COG0786 Glutamate permease; putative glutamate permease                                                                                                     |
| NGO1891 | 0.8692 | 1.12  | up   | 0.2247 | -2.59 | down | 0.6309 | -1.41 | down | hypothetical protein\ Context:(NC_002946)-[1858225-1858506]\ Notes:Best Blastp Hit: gb AAC45837.1  (AF001598) similar to Bordetella pertussis toxin accessory protein encoded by GenBank Accession Number X95386 [Neisseria gonorrhoeae] COG2183 Predicted RNA binding protein; contains S1                                                                                                                                              |
| NGO1893 | 0.6943 | -1.23 | down | 0.2777 | 1.64  | up   | 0.7680 | -1.21 | down | DamH\ Context:(NC_002946)-[1859711-1860718]\ Notes:Best Blastp Hit: gb AAC45839.1  (AF001598) N6-methyladenine methyltransferase [Neisseria gonorrhoeae]                                                                                                                                                                                                                                                                                 |
| NGO1894 | 0.5575 | -1.34 | down | 0.3967 | -1.37 | down | 0.1932 | -1.56 | down | putative 5-methylcytosine methyltransferase\ Context:(NC_002946)-[1860711-1861712]\ Notes:Best Blastp Hit: gb AAC45838.1  (AF001598) 5-methylcytosine methyltransferase [Neisseria gonorrhoeae] COG0270 Site-specific DNA methylase dcm                                                                                                                                                                                                  |
| NGO1895 | 0.5550 | 1.52  | up   | 0.1900 | -1.83 | down | 0.5823 | -1.46 | down | hypothetical protein\ Context:(NC_002946)-[1861743-1864016]\ Notes:Best Blastp Hit: sp P57072 YHGF_NEIMA hypothetical protein NMA0194 >gi 11278680 pir  E82013 probable transcription accessory protein NMA0194 [imported] - Neisseria meningitidis (group A strain Z2491) >gi 7378963 emb CAB83508.1  (AL162752) putative transcriptional accessory protein [Neisseria meningitidis] COG2183 Predicted RNA binding protein; contains S1 |

|         |        |       |      |        |       |      |        |       |      |                                                                                                                                                                                                                                                                                                                                                                                                                                                                                                                                                                                  |
|---------|--------|-------|------|--------|-------|------|--------|-------|------|----------------------------------------------------------------------------------------------------------------------------------------------------------------------------------------------------------------------------------------------------------------------------------------------------------------------------------------------------------------------------------------------------------------------------------------------------------------------------------------------------------------------------------------------------------------------------------|
| NGO1896 | 0.0922 | -2.60 | down | 0.2135 | -2.02 | down | 0.1110 | -2.29 | down | hypothetical protein\ Context:(NC_002946)+[1864135-1865151]\ Notes:Best Blastp Hit: sp Q05026 GALE_NEIGO UDP-glucose 4-epimerase (galactowaldenase) (UDP-galactose 4-epimerase) >gi 486715 pir  S34984 UDPglucose 4-epimerase (EC 5.1.3.2) - Neisseria gonorrhoeae >gi 1051296 emb CAA79721.1  (Z21508) UDP-glucose 4-epimerase [Neisseria gonorrhoeae] COG1087 UDP-glucose 4-epimerase                                                                                                                                                                                          |
| NGO1897 | 0.0809 | 3.91  | up   | 0.3519 | 2.04  | up   | 0.2236 | 1.78  | up   | hypothetical protein\ Context:(NC_002946)+[1865152-1866192]\ Notes:Best Blastp Hit: possibly phase variable - 8A residue homopolymer repeat in the coding sequence (ON) COG1088 dTDP-D-glucose 4;6-dehydratase                                                                                                                                                                                                                                                                                                                                                                   |
| NGO1898 | 0.3062 | -2.32 | down | 0.0337 | -3.86 | down | 0.9819 | -1.02 | down | glucose-1-phosphate thymidyltransferase\ Context:(NC_002946)+[1866297-1867163]\ Notes:Best Blastp Hit: sp P37762 RFBA_NEIGO glucose-1-phosphate thymidyltransferase (dTDP-glucose synthase) (dTDP-glucose pyrophosphorylase) >gi 628591 pir  S47046 glucose-1-phosphate thymidyltransferase (EC 2.7.7.24) - Neisseria gonorrhoeae >gi 520897 emb CAA83653.1  (Z32742) Glucose-1-phosphate thymidyltransferase [Neisseria gonorrhoeae] >gi 1333794 emb CAA79719.1  (Z21508) glucose-1-phosphate thymid transferase [Neisseria gonorrhoeae] COG1209 dTDP-glucose pyrophosphorylase |
| NGO1900 | 0.8934 | 1.06  | up   | 0.6604 | -1.25 | down | 0.9363 | -1.02 | down | hypothetical protein\ Context:(NC_002946)-[1867902-1869920]\ Notes:Best Blastp Hit: pir  B82015 probable integral membrane protein NMA0207 [imported] - Neisseria meningitidis (group A strain Z2491) >gi 7378976 emb CAB83521.1  (AL162752) putative integral membrane protein [Neisseria meningitidis] COG1297 Uncharacterized membrane protein                                                                                                                                                                                                                                |

|         |        |       |      |        |       |      |        |       |      |                                                                                                                                                                                                                                                                                                                                                                                                                                                                                                                                  |
|---------|--------|-------|------|--------|-------|------|--------|-------|------|----------------------------------------------------------------------------------------------------------------------------------------------------------------------------------------------------------------------------------------------------------------------------------------------------------------------------------------------------------------------------------------------------------------------------------------------------------------------------------------------------------------------------------|
| NGO1901 | 0.1580 | 2.13  | up   | 0.1518 | 1.77  | up   | 0.2545 | 1.58  | up   | putative heat shock protein/chaperone DnaJ\<br>Context:(NC_002946)-[1870115-1871236]\ Notes:Best<br>Blastp Hit: sp P57107 DNAJ_NEIMA chaperone protein<br>DNAJ >gi 11277169 pir   D81242 DnaJ protein NMA0209<br>[imported] - Neisseria meningitidis (group B strain MD58;<br>group A strain Z2491) >gi 7225280 gb AAF40528.1 <br>(AE002365) dnaJ protein [Neisseria meningitidis MC58]<br>>gi 7378977 emb CAB83522.1  (AL162752) DnaJ protein<br>[Neisseria meningitidis] COG0484 Molecular chaperones;<br>DnaJ family (contain |
| NGO1904 | 0.3386 | 1.55  | up   | 0.2719 | 1.47  | up   | 0.6486 | 1.13  | up   | DskA\ Context:(NC_002946)-[1878578-1878994]\<br>Notes:Best Blastp Hit: gb AAF40525.1  (AE002364) DnaK<br>suppressor protein [Neisseria meningitidis MC58] COG1734<br>DnaK suppressor protein DskA; putative dosage-dependent<br>DnaK suppressor protein                                                                                                                                                                                                                                                                          |
| NGO1905 | 0.9756 | -1.02 | down | 0.1768 | -1.69 | down | 0.2309 | -1.49 | down | putative pyrroline-5-carboxylate reductase\<br>Context:(NC_002946)-[1879145-1879936]\ Notes:Best<br>Blastp Hit: pir   H82015 probable pyrroline-5-carboxylate<br>reductase (EC 1.5.1.2) NMA0215 [imported] - Neisseria<br>meningitidis (group A strain Z2491)<br>>gi 7378982 emb CAB83527.1  (AL162752) putative<br>pyrroline-5-carboxylate reductase [Neisseria meningitidis]<br>COG0345 Pyrroline-5-carboxylate reductase                                                                                                      |
| NGO1906 | 0.0884 | -2.59 | down | 0.1776 | -1.97 | down | 0.1969 | -2.15 | down | hypothetical protein\ Context:(NC_002946)-[1879985-<br>1880392]\ Notes:Best Blastp Hit: pir   A82016 probable<br>lipoprotein NMA0216 [imported] - Neisseria meningitidis<br>(group A strain Z2491) >gi 7378983 emb CAB83528.1 <br>(AL162752) putative lipoprotein [Neisseria meningitidis]                                                                                                                                                                                                                                       |
| NGO1907 | 0.3817 | 1.77  | up   | 0.9377 | 1.06  | up   | 0.3533 | -2.05 | down | hypothetical protein\ Context:(NC_002946)-[1880392-<br>1881078]\ Notes:Best Blastp Hit: pir   C81243 conserved<br>hypothetical protein NMB0053 [imported] - Neisseria<br>meningitidis (group B strain MD58)<br>>gi 7225273 gb AAF40522.1  (AE002364) conserved<br>hypothetical protein [Neisseria meningitidis MC58]<br>COG0325 Predicted enzyme with a TIM-barrel fold                                                                                                                                                          |



|         |        |       |      |        |        |      |        |       |      |                                                                                                                                                                                                                                                                                                                                                           |
|---------|--------|-------|------|--------|--------|------|--------|-------|------|-----------------------------------------------------------------------------------------------------------------------------------------------------------------------------------------------------------------------------------------------------------------------------------------------------------------------------------------------------------|
| NGO1908 | 0.4734 | 1.53  | up   | 0.6266 | 1.20   | up   | 0.5965 | 1.20  | up   | twitching motility/pilus retraction protein\<br>Context:(NC_002946)+[1881198-1882241]\ Notes:Best Blastp Hit: gb AAB30824.1  (S72391) PilT=ATP binding cassette protein homolog [Neisseria gonorrhoeae; MS11; Peptide; 347 aa] COG0630 Predicted ATPases involved in pili                                                                                 |
| NGO1909 | 0.2233 | 2.37  | up   | 0.0587 | 2.59   | up   | 0.0795 | 2.58  | up   | putative twitching motility - like protein\<br>Context:(NC_002946)+[1882405-1883631]\ Notes:Best Blastp Hit: possibly phase variable - 8A residue homopolymer repeat in the coding sequence (ON) COG0630 Predicted ATPases involved in pili                                                                                                               |
| NGO1910 | 0.0491 | -4.28 | down | 0.0086 | -11.15 | down | 0.4587 | 1.46  | up   | hypothetical protein\<br>Context:(NC_002946)+[1883748-1885898]\ Notes:Best Blastp Hit: pir   H81242 conserved hypothetical protein NMB0050 [imported] - Neisseria meningitidis (group B strain MD58)<br>>gi 7225270 gb AAF40519.1  (AE002364) conserved hypothetical protein [Neisseria meningitidis MC58] COG1289 Uncharacterized membrane protein; YhfK |
| NGO1911 | 0.2534 | 2.46  | up   | 0.6414 | 1.20   | up   | 0.3702 | -1.35 | down | hypothetical protein\<br>Context:(NC_002946)-[1886380-1886664]\ Notes:Best Blastp Hit: emb CAA05407.1  (AJ002423) hypothetical protein [Neisseria gonorrhoeae]                                                                                                                                                                                            |
| NGO1913 | 0.0448 | -4.13 | down | 0.0463 | -13.54 | down | 0.8388 | -1.20 | down | hypothetical protein\<br>Context:(NC_002946)+[1891120-1891512]\ Notes:Best Blastp Hit: possibly phase variable - 8A residue homopolymer repeat in the coding sequence (ON)                                                                                                                                                                                |
| NGO1914 | 0.0034 | -5.74 | down | 0.1626 | -2.91  | down | 0.0774 | -1.93 | down | 6-phosphogluconate dehydrogenase\<br>Context:(NC_002946)+[1891592-1893040]\ Notes:catalyzes the formation of D-ribulose 5-phosphate from 6-phospho-D-gluconate                                                                                                                                                                                            |
| NGO1915 | 0.1214 | -2.61 | down | 0.0691 | -3.90  | down | 0.2079 | -3.49 | down | 3-deoxy-D-manno-octulosonic-acid transferase\<br>Context:(NC_002946)+[1893103-1894374]\ Notes:catalyzes the transfer of 2-keto-3-deoxy-D-manno-octulosonic acid to lipid A                                                                                                                                                                                |
| NGO1916 | 0.8723 | -1.12 | down | 0.0600 | -3.16  | down | 0.1505 | -2.91 | down | hypothetical protein\<br>Context:(NC_002946)+[1894415-1894864]\ Notes:Best Blastp Hit: pir   C81248 conserved hypothetical protein NMB0013 [imported] - Neisseria meningitidis (group B strain MD58)<br>>gi 7225238 gb AAF40492.1  (AE002359) conserved hypothetical protein [Neisseria meningitidis MC58]                                                |

|         |        |       |      |        |       |      |        |       |      |                                                                                                                                                                                                                                                                                                                                                                      |
|---------|--------|-------|------|--------|-------|------|--------|-------|------|----------------------------------------------------------------------------------------------------------------------------------------------------------------------------------------------------------------------------------------------------------------------------------------------------------------------------------------------------------------------|
| NGO1917 | 0.2533 | -2.08 | down | 0.5940 | -1.28 | down | 0.1311 | -3.33 | down | hypothetical protein\ Context:(NC_002946)+[1894897-1895871]\ Notes:Best Blastp Hit: possibly phase variable - 8T residue homopolymer repeat in the coding sequence (ON) COG0861 Membrane protein TerC; possibly involved in                                                                                                                                          |
| NGO1918 | 0.9172 | -1.05 | down | 0.7528 | -1.14 | down | 0.6727 | -1.12 | down | UDP-N-acetylglucosamine1-carboxyvinyltransferase\ Context:(NC_002946)+[1896236-1897489]\ Notes:adds enolpyruvyl to UDP-N-acetylglucosamine as a component of cell wall formation; gram-positive bacteria have 2 copies of MurA which are active                                                                                                                      |
| NGO1919 | 0.3991 | -1.54 | down | 0.5325 | 1.26  | up   | 0.4576 | 1.37  | up   | phosphoglycerate kinase\ Context:(NC_002946)+[1897570-1898763]\ Notes:Converts 3-phospho-D-glycerate to 3-phospho-D-glyceroyl phosphate during the glycolysis pathway                                                                                                                                                                                                |
| NGO1920 | 0.1472 | 2.30  | up   | 0.7337 | 1.15  | up   | 0.3585 | 1.35  | up   | hypothetical protein\ Context:(NC_002946)-[1898815-1899063]\ Notes:Best Blastp Hit: emb CAB83564.1 (AL162752) hypothetical protein NMA0256 [Neisseria meningitidis] COG0271 Stress-induced morphogen BolA (activity)                                                                                                                                                 |
| NGO1921 | 0.4791 | 1.49  | up   | 0.9157 | -1.04 | down | 0.4575 | 1.21  | up   | hypothetical protein\ Context:(NC_002946)-[1899156-1900073]\ Notes:Best Blastp Hit: sp P95357 FTSX_NEIGO cell division protein FtsX homolog >gi 1684782 gb AAB36525.1  (U76418) FtsX-like protein [Neisseria gonorrhoeae] COG2177 Cell division protein FtsX                                                                                                         |
| NGO1922 | 0.7909 | -1.18 | down | 0.3014 | -1.45 | down | 0.6348 | -1.14 | down | hypothetical protein\ Context:(NC_002946)-[1900070-1900720]\ Notes:Best Blastp Hit: pir E81247 cell division ATP-binding protein FtsE NMB0007 [imported] - Neisseria meningitidis (group B strain MD58) >gi 7225232 gb AAF40486.1  (AE002359) cell division ATP-binding protein FtsE [Neisseria meningitidis MC58] COG1135 Uncharacterized ABC-type transport system |
| NGO1923 | 0.3644 | -1.55 | down | 0.2008 | -2.22 | down | 0.5544 | -1.19 | down | putative thioredoxin\ Context:(NC_002946)-[1900914-1901396]\ Notes:Best Blastp Hit: gb AAB36523.1  (U76418) thioredoxin-like protein [Neisseria gonorrhoeae] COG0526 Thiol-disulfide isomerase and thioredoxins                                                                                                                                                      |

|         |        |       |      |        |       |      |        |       |      |                                                                                                                                                                                                                                                                                                                                                                                                                                   |
|---------|--------|-------|------|--------|-------|------|--------|-------|------|-----------------------------------------------------------------------------------------------------------------------------------------------------------------------------------------------------------------------------------------------------------------------------------------------------------------------------------------------------------------------------------------------------------------------------------|
| NGO1924 | 0.1818 | -2.05 | down | 0.0664 | -2.90 | down | 0.1553 | -1.86 | down | ArsC\ Context:(NC_002946)+[1901520-1901873]\<br>Notes:Best Blastp Hit: pir     C81247 arsenate reductase<br>NMB0005 [imported] - Neisseria meningitidis (group B<br>strain MD58; group A strain Z2491)<br>>gi 7225230 gb AAF40484.1  (AE002359) arsenate<br>reductase [Neisseria meningitidis MC58]<br>>gi 7379014 emb CAB83560.1  (AL162752) putative<br>oxidoreductase [Neisseria meningitidis]; putative arsenate<br>reductase |
| NGO1925 | 0.2190 | 2.21  | up   | 0.9662 | -1.02 | down | 0.9870 | 1.00  | up   | hypothetical protein\ Context:(NC_002946)+[1901870-<br>1902526]\ Notes:Best Blastp Hit: emb CAB83559.1 <br>(AL162752) putative periplasmic protein [Neisseria<br>meningitidis] COG1434 Uncharacterized ACR                                                                                                                                                                                                                        |
| NGO1926 | 0.3538 | 1.50  | up   | 0.4751 | 1.32  | up   | 0.1524 | 1.49  | up   | glutamyl-tRNA synthetase\ Context:(NC_002946)+[1902642-<br>1904036]\ Notes:Charges one glutamine molecule and pairs<br>it to its corresponding RNA trinucleotide during protein<br>translation                                                                                                                                                                                                                                    |
| NGO1927 | 0.9496 | 1.04  | up   | 0.7732 | 1.13  | up   | 0.7125 | -1.18 | down | hypothetical protein\ Context:(NC_002946)+[1904057-<br>1904452]\ Notes:Best Blastp Hit: pir     H81246 hypothetical<br>protein NMB0002 [imported] - Neisseria meningitidis<br>(group B strain MD58) >gi 7225227 gb AAF40481.1 <br>(AE002359) hypothetical protein [Neisseria meningitidis<br>MC58]                                                                                                                                |
| NGO1928 | 0.1664 | 3.04  | up   | 0.2002 | 2.00  | up   | 0.4300 | 1.59  | up   | putative acetyltransferase\ Context:(NC_002946)+[1904456-<br>1904947]\ Notes:Best Blastp Hit: pir     D82019 probable<br>acetyltransferase NMA0248 [imported] - Neisseria<br>meningitidis (group A strain Z2491)<br>>gi 7379010 emb CAB83556.1  (AL162752) putative<br>acetyltransferase [Neisseria meningitidis] COG0456<br>Acetyltransferases                                                                                   |
| NGO1929 | 0.5404 | -2.78 | down | 0.1018 | -6.96 | down | 0.3952 | 1.45  | up   | hypothetical protein\ Context:(NC_002946)+[1904953-<br>1905081]\ Notes:Best Blastp Hit: gb AAA96487.1  (L36381)<br>putative [Neisseria gonorrhoeae]                                                                                                                                                                                                                                                                               |
| NGO1930 | 0.9653 | -1.02 | down | 0.4648 | -1.76 | down | 0.0230 | -3.77 | down | DNA mismatch repair protein\ Context:(NC_002946)-<br>[1905223-1907817]\ Notes:This protein performs the<br>mismatch recognition step during the DNA repair process                                                                                                                                                                                                                                                                |

|         |        |       |      |        |      |    |        |       |      |                                                                                                                                                                                                                                                                                                                                                                                                                                   |
|---------|--------|-------|------|--------|------|----|--------|-------|------|-----------------------------------------------------------------------------------------------------------------------------------------------------------------------------------------------------------------------------------------------------------------------------------------------------------------------------------------------------------------------------------------------------------------------------------|
| NGO1931 | 0.0686 | 3.38  | up   | 0.0216 | 2.59 | up | 0.0779 | 2.34  | up   | GapC\ Context:(NC_002946)+[1908251-1909255]\<br>Notes:Best Blastp Hit: pir    B82019 glyceraldehyde-3-phosphate dehydrogenase (EC 1.2.1.12) C NMA0246 [imported] - Neisseria meningitidis (group A strain Z2491) >gi 7379008 emb CAB83554.1  (AL162752) glyceraldehyde 3-phosphate dehydrogenase C [Neisseria meningitidis] COG0057 Glyceraldehyde-3-phosphate dehydrogenase; putative glyceraldehyde 3-phosphate dehydrogenase C |
| NGO1932 | 0.8055 | -1.18 | down | 0.3481 | 1.69 | up | 0.6075 | -1.29 | down | hypothetical protein\ Context:(NC_002946)-[1909407-1910087]\ Notes:Best Blastp Hit: gb AAF42466.1  (AE002563) conserved hypothetical protein [Neisseria meningitidis MC58] COG1720 Uncharacterized ACR; YaeB/UPF0066 family                                                                                                                                                                                                       |
| NGO1933 | 0.2479 | 1.84  | up   | 0.6157 | 1.21 | up | 0.5482 | 1.20  | up   | hypothetical protein\ Context:(NC_002946)+[1910547-1911182]\ Notes:Best Blastp Hit: gb AAF42465.1  (AE002563) pyrazinamidase/nicotinamidase PncA; putative [Neisseria meningitidis MC58] COG1335 Amidases related to nicotinamidase                                                                                                                                                                                               |
| NGO1934 | 0.1869 | 1.94  | up   | 0.0592 | 2.15 | up | 0.8946 | 1.03  | up   | RfaC\ Context:(NC_002946)+[1911219-1912187]\ Notes:Best Blastp Hit: pir    S60783 lipopolysaccharide heptosyltransferase (EC 2.4.99.-) I rfaC [similarity] - Neisseria gonorrhoeae >gi 606855 gb AAA93059.1  (U10385) lipooligosaccharide heptosyltransferase-1 [Neisseria gonorrhoeae] COG0859 ADP-heptose:LPS heptosyltransferase; lipopolysaccharide heptosyltransferase I                                                     |
| NGO1935 | 0.2219 | 2.06  | up   | 0.0611 | 2.53 | up | 0.4087 | 1.30  | up   | EtfB\ Context:(NC_002946)+[1912413-1913162]\ Notes:Best Blastp Hit: pir    A81001 electron transfer flavoprotein; beta chain NMB2155 [imported] - Neisseria meningitidis (group B strain MD58) >gi 7227413 gb AAF42463.1  (AE002563) electron transfer flavoprotein; beta subunit [Neisseria meningitidis MC58] COG2086 Electron transfer flavoprotein beta-subunit; putative electron transfer flavoprotein beta-subunit         |

|         |        |        |      |        |        |      |        |       |      |                                                                                                                                                                                                                                                                                                                                                                                                                      |
|---------|--------|--------|------|--------|--------|------|--------|-------|------|----------------------------------------------------------------------------------------------------------------------------------------------------------------------------------------------------------------------------------------------------------------------------------------------------------------------------------------------------------------------------------------------------------------------|
| NGO1936 | 0.2145 | 1.93   | up   | 0.4182 | 1.35   | up   | 0.5578 | 1.16  | up   | Etfa\ Context:(NC_002946)+[1913173-1914108]\<br>Notes:Best Blastp Hit: pir   H81000 electron transfer flavoprotein; alpha chain NMB2154 [imported] - Neisseria meningitidis (group B strain MD58)<br>>gi 7227412 gb AAF42462.1  (AE002563) electron transfer flavoprotein; alpha subunit [Neisseria meningitidis MC58] COG2025 Electron transfer flavoprotein; putative electron transfer flavoprotein alpha-subunit |
| NGO1938 | 0.0004 | -27.26 | down | 0.0437 | -17.46 | down | 0.1674 | -2.87 | down | hypothetical protein\ Context:(NC_002946)-[1914832-1915035]\ Notes:Best Blastp Hit: pir   F81000 hypothetical protein NMB2152 [imported] - Neisseria meningitidis (group B strain MD58) >gi 7227410 gb AAF42460.1  (AE002563) hypothetical protein [Neisseria meningitidis MC58]                                                                                                                                     |
| NGO1939 | 0.5419 | 1.32   | up   | 0.3943 | 1.35   | up   | 0.7807 | -1.08 | down | phosphoribosylamine--glycine ligase\<br>Context:(NC_002946)+[1915307-1916578]\ Notes:catalyzes the formation of N(1)-(5-phospho-D-ribosyl)glycinamide from 5-phospho-D-ribosylamine and glycine in purine biosynthesis                                                                                                                                                                                               |
| NGO1940 | 0.0304 | -4.45  | down | 0.0146 | -6.82  | down | 0.0008 | -6.57 | down | hypothetical protein\ Context:(NC_002946)+[1916612-1917214]\ Notes:Best Blastp Hit: emb CAB83545.1  (AL162752) hypothetical protein NMA0237 [Neisseria meningitidis] COG0009 Putative translation factor (SUA5)                                                                                                                                                                                                      |
| NGO1941 | 0.4033 | 2.51   | up   | 0.8766 | 1.14   | up   | 0.5854 | -1.60 | down | hypothetical protein\ Context:(NC_002946)+[1917229-1917744]\ Notes:Best Blastp Hit: emb CAB83544.1  (AL162752) NMA0236; unknnonwn; len: 77 aa [Neisseria meningitidis]                                                                                                                                                                                                                                               |
| NGO1942 | 0.1911 | 2.45   | up   | 0.3405 | 1.48   | up   | 0.9519 | 1.02  | up   | hypothetical protein\ Context:(NC_002946)-[1917896-1918318]\ Notes:Best Blastp Hit: pir   A81003 probable lipoprotein NMA0233 [imported] - Neisseria meningitidis (group B strain MD58; group A strain Z2491)<br>>gi 7227404 gb AAF42455.1  (AE002562) hypothetical protein [Neisseria meningitidis MC58]<br>>gi 7378997 emb CAB83542.1  (AL162752) putative lipoprotein [Neisseria meningitidis]                    |
| NGO1943 | 0.3055 | -2.39  | down | 0.8157 | -1.33  | down | 0.3954 | -1.98 | down | hypothetical protein\ Context:(NC_002946)-[1918568-1918747]\ Notes:Best Blastp Hit: gb AAF42453.1  (AE002562) hypothetical protein [Neisseria meningitidis MC58]                                                                                                                                                                                                                                                     |

|         |        |       |      |        |       |      |        |       |      |                                                                                                                                                                                                                                                                                                                                                                                                              |
|---------|--------|-------|------|--------|-------|------|--------|-------|------|--------------------------------------------------------------------------------------------------------------------------------------------------------------------------------------------------------------------------------------------------------------------------------------------------------------------------------------------------------------------------------------------------------------|
| NGO1944 | 0.2074 | 2.22  | up   | 0.1409 | 1.83  | up   | 0.6299 | -1.17 | down | RNA polymerase sigma factor\ Context:(NC_002946)-[1918753-1919340]\ Notes:Bacteria have multiple sigma factors which are active under specific conditions; the sigma factor binds with the catalytic core of RNA polymerase to produce the holoenzyme and directs bacterial core RNA polymerase to specific promoter elements to initiate transcription                                                      |
| NGO1945 | 0.3943 | 2.02  | up   | 0.4562 | 2.73  | up   | 0.0584 | -3.99 | down | hypothetical protein\ Context:(NC_002946)-[1919362-1920108]\ Notes:Best Blastp Hit: pir    E82017 hypothetical protein NMA0229 [imported] - Neisseria meningitidis (group A strain Z2491) >gi 7378995 emb CAB83540.1  (AL162752) hypothetical protein NMA0229 [Neisseria meningitidis]                                                                                                                       |
| NGO1946 | 0.8819 | -1.09 | down | 0.9388 | -1.05 | down | 0.0062 | -4.70 | down | hypothetical protein\ Context:(NC_002946)-[1920098-1920940]\ Notes:Best Blastp Hit: pir    D82017 hypothetical protein NMA0228 [imported] - Neisseria meningitidis (group A strain Z2491) >gi 7378994 emb CAB83539.1  (AL162752) hypothetical protein NMA0228 [Neisseria meningitidis]                                                                                                                       |
| NGO1947 | 0.2628 | 2.08  | up   | 0.4431 | 1.35  | up   | 0.3270 | 1.64  | up   | hypothetical protein\ Context:(NC_002946)-[1921058-1921396]\ Notes:Best Blastp Hit: pir    C81002 probable periplasmic protein NMA0227 [imported] - Neisseria meningitidis (group B strain MD58; group A strain Z2491) >gi 7227398 gb AAF42449.1  (AE002562) hypothetical protein [Neisseria meningitidis MC58] >gi 7378993 emb CAB83538.1  (AL162752) putative periplasmic protein [Neisseria meningitidis] |
| NGO1948 | 0.0046 | -7.85 | down | 0.0076 | -8.61 | down | 0.0006 | -7.92 | down | hypothetical protein\ Context:(NC_002946)-[1921470-1921919]\ Notes:Best Blastp Hit: pir    B81002 conserved hypothetical protein NMB2140 [imported] - Neisseria meningitidis (group B strain MD58) >gi 7227397 gb AAF42448.1  (AE002562) conserved hypothetical protein [Neisseria meningitidis MC58]                                                                                                        |

|         |        |       |      |        |        |      |        |       |      |                                                                                                                                                                                                                                                                                                                                                                                                                                        |
|---------|--------|-------|------|--------|--------|------|--------|-------|------|----------------------------------------------------------------------------------------------------------------------------------------------------------------------------------------------------------------------------------------------------------------------------------------------------------------------------------------------------------------------------------------------------------------------------------------|
| NGO1949 | 0.3332 | -1.56 | down | 0.1522 | -1.94  | down | 0.2432 | -1.51 | down | hypothetical protein\ Context:(NC_002946)+[1922250-1923152]\ Notes:Best Blastp Hit: pir   A82017 probable lipoprotein NMA0225 [imported] - Neisseria meningitidis (group A strain Z2491) >gi 7378991 emb CAB83536.1  (AL162752) possible lipoprotein [Neisseria meningitidis] COG1752 Putative phosphoesterases; homologs of                                                                                                           |
| NGO1951 | 0.8308 | -1.09 | down | 0.4486 | -1.51  | down | 0.2335 | -1.61 | down | peptide chain release factor 2\ Context:(NC_002946)+[1923255-1924358]\ Notes:recognizes the termination signals UGA and UAA during protein translation a specificity which is dependent on amino acid residues residing in loops of the L-shaped tRNA-like molecule of RF2; in some organisms control of PrfB protein levels is maintained through a +1 ribosomal frameshifting mechanism; this protein is similar to release factor 1 |
| NGO1952 | 0.7032 | -1.37 | down | 0.0023 | -20.01 | down | 0.1498 | 2.15  | up   | hypothetical protein\ Context:(NC_002946)-[1924516-1924728]\ Notes:Best Blastp Hit: gb AAF42445.1  (AE002562) hypothetical protein [Neisseria meningitidis MC58]                                                                                                                                                                                                                                                                       |
| NGO1953 | 0.7718 | 1.19  | up   | 0.8425 | -1.12  | down | 0.4344 | -1.35 | down | hypothetical protein\ Context:(NC_002946)-[1924854-1925114]\ Notes:Best Blastp Hit: possibly phase variable - 8C residue homopolymer repeat in the coding sequence (ON)                                                                                                                                                                                                                                                                |
| NGO1954 | 0.1641 | -2.14 | down | 0.8644 | -1.14  | down | 0.9901 | -1.01 | down | putative peptide transporter\ Context:(NC_002946)-[1925126-1926583]\ Notes:Best Blastp Hit: gb AAF42444.1  (AE002562) peptide transporter [Neisseria meningitidis MC58] COG0477 Permeases                                                                                                                                                                                                                                              |
| NGO1955 | 0.6472 | 1.30  | up   | 0.4188 | 2.10   | up   | 0.1026 | 6.00  | up   | hypothetical protein\ Context:(NC_002946)-[1927364-1931533]\ Notes:Best Blastp Hit: gb AAF42443.1  (AE002561) conserved hypothetical protein [Neisseria meningitidis MC58]                                                                                                                                                                                                                                                             |
| NGO1956 | 0.9310 | 1.08  | up   | 0.0803 | -3.30  | down | 0.4461 | -1.62 | down | hypothetical protein\ Context:(NC_002946)-[1931588-1933495]\ Notes:Best Blastp Hit: pir   G81003 conserved hypothetical protein NMB2134 [imported] - Neisseria meningitidis (group B strain MD58) >gi 7227390 gb AAF42442.1  (AE002561) conserved hypothetical protein [Neisseria meningitidis MC58] COG0729 Predicted outer membrane protein                                                                                          |

|         |        |       |      |        |        |      |        |       |      |                                                                                                                                                                                                                                                                                                                                                    |
|---------|--------|-------|------|--------|--------|------|--------|-------|------|----------------------------------------------------------------------------------------------------------------------------------------------------------------------------------------------------------------------------------------------------------------------------------------------------------------------------------------------------|
| NGO1957 | 0.7991 | 1.14  | up   | 0.1597 | -2.09  | down | 0.9099 | -1.03 | down | serine/threonine transporter SstT\<br>Context:(NC_002946)+[1933806-1935035]\ Notes:involved<br>in the import of serine and threonine coupled with the<br>import of sodium                                                                                                                                                                          |
| NGO1958 | 0.5114 | -1.52 | down | 0.8835 | 1.06   | up   | 0.0421 | -3.15 | down | hypothetical protein\ Context:(NC_002946)+[1935186-<br>1936475]\ Notes:Best Blastp Hit:<br>gb AAF44763.1 AF235146_1 (AF235146) GNA2132<br>[Neisseria gonorrhoeae]<br>>gi 7274418 gb AAF44764.1 AF235147_1 (AF235147)<br>GNA2132 [Neisseria gonorrhoeae]                                                                                            |
| NGO1959 | 0.3476 | 1.67  | up   | 0.9817 | 1.01   | up   | 0.6118 | 1.20  | up   | hypothetical protein\ Context:(NC_002946)+[1936475-<br>1936678]\ Notes:Best Blastp Hit: pir   B82029 probable<br>malate dehydrogenase (acceptor) (EC 1.1.99.16) NMA0333<br>[imported] - Neisseria meningitidis (group A strain Z2491)<br>>gi 7379088 emb CAB83637.1  (AL162752) probable<br>malate:quinone oxidoreductase [Neisseria meningitidis] |
| NGO1960 | 0.1871 | -2.37 | down | 0.0395 | -14.04 | down | 0.6529 | -1.25 | down | hypothetical protein\ Context:(NC_002946)+[1936946-<br>1937212]\ Notes:                                                                                                                                                                                                                                                                            |
| NGO1961 | 0.4746 | 1.41  | up   | 0.7729 | 1.11   | up   | 0.6466 | 1.17  | up   | argininosuccinate synthase\ Context:(NC_002946)-<br>[1937605-1938948]\ Notes:catalyzes the formation of<br>arginosuccinate from citrulline and aspartate in arginine<br>biosynthesis                                                                                                                                                               |
| NGO1962 | 0.8477 | 1.10  | up   | 0.4118 | -1.52  | down | 0.7319 | 1.17  | up   | hypothetical protein\ Context:(NC_002946)+[1939073-<br>1939873]\ Notes:Best Blastp Hit: gb AAF42436.1 <br>(AE002560) CinA-related protein [Neisseria meningitidis<br>MC58] COG1058 Uncharacterized ACR                                                                                                                                             |
| NGO1963 | 0.4504 | 1.42  | up   | 0.5344 | -1.32  | down | 0.3919 | -1.38 | down | putative protease\ Context:(NC_002946)+[1939913-<br>1940899]\ Notes:Best Blastp Hit: emb CAB83609.1 <br>(AL162752) putative protease [Neisseria meningitidis]<br>COG0616 Periplasmic serine proteases                                                                                                                                              |
| NGO1965 | 0.9091 | -1.06 | down | 0.9079 | 1.06   | up   | 0.1610 | -1.86 | down | hypothetical protein\ Context:(NC_002946)-[1942504-<br>1942878]\ Notes:Best Blastp Hit: pir   A82026 hypothetical<br>protein NMA0307 [imported] - Neisseria meningitidis<br>(group A strain Z2491) >gi 7379063 emb CAB83612.1 <br>(AL162752) hypothetical protein NMA0307 [Neisseria<br>meningitidis]                                              |



|         |        |       |      |        |       |      |        |       |      |                                                                                                                                                                                                                                                                                  |
|---------|--------|-------|------|--------|-------|------|--------|-------|------|----------------------------------------------------------------------------------------------------------------------------------------------------------------------------------------------------------------------------------------------------------------------------------|
| NGO1966 | 0.9490 | -1.04 | down | 0.7677 | -1.15 | down | 0.3358 | -1.43 | down | hypothetical protein\ Context:(NC_002946)-[1943052-1943408]\ Notes:Best Blastp Hit: pir   A81007 hypothetical protein NMB2106 [imported] - Neisseria meningitidis (group B strain MD58) >gi 7227367 gb AAF42421.1  (AE002559) hypothetical protein [Neisseria meningitidis MC58] |
| NGO1967 | 0.7241 | -1.33 | down | 0.1771 | 3.13  | up   | 0.8211 | -1.28 | down | hypothetical protein\ Context:(NC_002946)-[1944697-1945056]\ Notes:Best Blastp Hit: possibly phase variable - 8T residue homopolymer repeat in the coding sequence (ON)                                                                                                          |
| NGO1969 | 0.2413 | 1.90  | up   | 0.5546 | 1.30  | up   | 0.5968 | -1.21 | down | hypothetical protein\ Context:(NC_002946)-[1947207-1947416]\ Notes:Best Blastp Hit: emb CAB83344.1  (AL162752) hypothetical protein NMA0024 [Neisseria meningitidis]                                                                                                             |
| NGO1970 | 0.0490 | 3.93  | up   | 0.1125 | 2.01  | up   | 0.7692 | -1.16 | down | hypothetical protein\ Context:(NC_002946)-[1947493-1947852]\ Notes:Best Blastp Hit: gb AAF40793.1  (AE002391) hypothetical protein [Neisseria meningitidis MC58]                                                                                                                 |
| NGO1971 | 0.3764 | 1.55  | up   | 0.9954 | 1.00  | up   | 0.5965 | -1.15 | down | MafB5\ Context:(NC_002946)-[1947857-1949353]\ Notes:Best Blastp Hit: possibly phase variable - two 8A residue homopolymer repeats in the coding sequence (ON); putative mafB-like adhesin                                                                                        |
| NGO1973 | 0.0047 | -8.15 | down | 0.2907 | -2.19 | down | 0.6145 | -1.48 | down | uridylyate kinase\ Context:(NC_002946)-[1950486-1951205]\ Notes:Catalyzes the phosphorylation of UMP to UDP                                                                                                                                                                      |
| NGO1974 | 0.1661 | 2.37  | up   | 0.1906 | 1.58  | up   | 0.3243 | 1.57  | up   | elongation factor Ts\ Context:(NC_002946)-[1951422-1952276]\ Notes:EF-Ts; functions during elongation stage of protein translation; forms a dimer; associates with EF-Tu-GDP complex and promotes exchange of GDP to GTP resulting in regeneration of the active form of EF-Tu   |
| NGO1975 | 0.1027 | 2.74  | up   | 0.2749 | 1.45  | up   | 0.1793 | 1.66  | up   | 30S ribosomal protein S2\ Context:(NC_002946)-[1952405-1953133]\ Notes:one of the last subunits in the assembly of the 30S subunit; absence of S2 does not inhibit assembly but results in an inactive subunit                                                                   |
| NGO1976 | 0.0290 | -6.88 | down | 0.0162 | -5.89 | down | 0.7557 | -1.22 | down | hypothetical protein\ Context:(NC_002946)-[1953306-1953539]\ Notes:Best Blastp Hit: gb AAF42417.1  (AE002559) hypothetical protein [Neisseria meningitidis MC58]                                                                                                                 |

|         |        |       |      |        |       |      |        |       |      |                                                                                                                                                                                                                                                                                                                           |
|---------|--------|-------|------|--------|-------|------|--------|-------|------|---------------------------------------------------------------------------------------------------------------------------------------------------------------------------------------------------------------------------------------------------------------------------------------------------------------------------|
| NGO1977 | 0.0207 | -4.13 | down | 0.0249 | -5.83 | down | 0.8961 | -1.09 | down | hypothetical protein\ Context:(NC_002946)+[1953539-1954198]\ Notes:Best Blastp Hit: emb CAB83635.1 (AL162752) hypothetical protein NMA0330 [Neisseria meningitidis] COG0212 5-formyltetrahydrofolate cyclo-ligase                                                                                                         |
| NGO1978 | 0.4236 | 1.83  | up   | 0.4887 | -1.91 | down | 0.0347 | -2.96 | down | hypothetical protein\ Context:(NC_002946)+[1954259-1954849]\ Notes:Best Blastp Hit: emb CAB83636.1 (AL162752) hypothetical protein NMA0331 [Neisseria meningitidis] COG1670 Acetyltransferases; including N-acetylases                                                                                                    |
| NGO1980 | 0.0168 | -4.29 | down | 0.0669 | -3.02 | down | 0.0144 | -3.85 | down | malate:quinone oxidoreductase\ Context:(NC_002946)+[1955233-1956699]\ Notes:malate dehydrogenase; catalyzes the oxidation of malate to oxaloacetate                                                                                                                                                                       |
| NGO1981 | 0.7872 | 1.16  | up   | 0.9544 | -1.04 | down | 0.8063 | 1.14  | up   | hypothetical protein\ Context:(NC_002946)-[1956886-1957446]\ Notes:Best Blastp Hit: emb CAB83638.1 (AL162752) putative adhesin component [Neisseria meningitidis]                                                                                                                                                         |
| NGO1982 | 0.1280 | 2.68  | up   | 0.0560 | 3.03  | up   | 0.2366 | 1.69  | up   | hypothetical protein\ Context:(NC_002946)-[1957498-1957797]\ Notes:Best Blastp Hit: gb AAF42411.1 (AE002558) hypothetical protein [Neisseria meningitidis MC58] >gi 7379090 emb CAB83639.1 (AL162752) hypothetical protein NMA0336 [Neisseria meningitidis]                                                               |
| NGO1983 | 0.4653 | 1.47  | up   | 0.0499 | 3.36  | up   | 0.1246 | 1.67  | up   | hypothetical protein\ Context:(NC_002946)-[1957896-1958675]\ Notes:Best Blastp Hit: pir C81008 methionine aminopeptidase NMB2093 [imported] - Neisseria meningitidis (group B strain MD58) >gi 7227355 gb AAF42410.1 (AE002558) methionine aminopeptidase [Neisseria meningitidis MC58] COG0024 Methionine aminopeptidase |
| NGO1984 | 0.8633 | -1.08 | down | 0.9914 | 1.00  | up   | 0.8430 | -1.14 | down | hypothetical protein\ Context:(NC_002946)-[1958715-1959365]\ Notes:Best Blastp Hit: gb AAF42409.1 (AE002558) hypothetical protein [Neisseria meningitidis MC58]                                                                                                                                                           |
| NGO1985 | 0.7611 | 1.18  | up   | 0.8481 | -1.09 | down | 0.9947 | -1.00 | down | hypothetical protein\ Context:(NC_002946)-[1959373-1959981]\ Notes:Best Blastp Hit: pir G82029 probable lipoprotein NMA0339 [imported] - Neisseria meningitidis (group A strain Z2491) >gi 7379093 emb CAB83642.1 (AL162752) putative lipoprotein [Neisseria meningitidis]                                                |

|         |        |       |      |        |       |      |        |       |      |                                                                                                                                                                                                                                                                                                                                            |
|---------|--------|-------|------|--------|-------|------|--------|-------|------|--------------------------------------------------------------------------------------------------------------------------------------------------------------------------------------------------------------------------------------------------------------------------------------------------------------------------------------------|
| NGO1986 | 0.9855 | -1.01 | down | 0.7006 | -1.20 | down | 0.6524 | -1.15 | down | phosphoheptose isomerase\ Context:(NC_002946)-[1960045-1960638]\ Notes:catalyzes the isomerization of sedoheptulose 7-phosphate to D-glycero-D-manno-heptose 7-phosphate                                                                                                                                                                   |
| NGO1987 | 0.4749 | -1.38 | down | 0.7543 | -1.16 | down | 0.5167 | -1.25 | down | hypothetical protein\ Context:(NC_002946)-[1960643-1960990]\ Notes:Best Blastp Hit: pir    A82030 hypothetical protein NMA0341 [imported] - Neisseria meningitidis (group A strain Z2491) >gi 7379095 emb CAB83644.1  (AL162752) hypothetical protein NMA0341 [Neisseria meningitidis] COG0792 Predicted endonuclease distantly related to |
| NGO1988 | 0.1436 | 5.23  | up   | 0.5464 | -2.31 | down | 0.4359 | -1.51 | down | hypothetical protein\ Context:(NC_002946)+[1961037-1961912]\ Notes:Best Blastp Hit: pir    B82030 hypothetical protein NMA0342 [imported] - Neisseria meningitidis (group A strain Z2491) >gi 7379096 emb CAB83645.1  (AL162752) hypothetical protein NMA0342 [Neisseria meningitidis] COG0313 Predicted methyltransferases                |
| NGO1989 | 0.4194 | -1.89 | down | 0.0929 | -6.08 | down | 0.3459 | -2.66 | down | hypothetical protein\ Context:(NC_002946)+[1961935-1962756]\ Notes:Best Blastp Hit: pir    E81007 hypothetical protein NMB2087 [imported] - Neisseria meningitidis (group B strain MD58) >gi 7227349 gb AAF42404.1  (AE002558) hypothetical protein [Neisseria meningitidis MC58]                                                          |
| NGO1990 | 0.7842 | 1.14  | up   | 0.5366 | -1.31 | down | 0.6663 | 1.12  | up   | GTPase ObgE\ Context:(NC_002946)+[1962756-1963910]\ Notes:essential GTPase; exhibits high exchange rate for GTP/GDP; associates with 50S ribosomal subunit; involved in regulation of chromosomal replication                                                                                                                              |
| NGO1991 | 0.7933 | 1.13  | up   | 0.1918 | 1.56  | up   | 0.4499 | 1.21  | up   | NgoIM\ Context:(NC_002946)+[1963964-1964911]\ Notes:Best Blastp Hit: gb AAB03206.2  (U42459) cytosine DNA methylase M.Ngol [Neisseria gonorrhoeae] COG0270 Site-specific DNA methylase dcm                                                                                                                                                 |
| NGO1992 | 0.2331 | 2.17  | up   | 0.0437 | 2.25  | up   | 0.8418 | 1.06  | up   | putative NgoI restriction endonuclease\ Context:(NC_002946)+[1964908-1965960]\ Notes:Best Blastp Hit: gb AAB03207.2  (U42459) NgoI restriction endonuclease R.Ngol [Neisseria gonorrhoeae]                                                                                                                                                 |

|         |        |      |    |        |       |      |        |       |      |                                                                                                                                                                                                                                                                                                                                                                                                                              |
|---------|--------|------|----|--------|-------|------|--------|-------|------|------------------------------------------------------------------------------------------------------------------------------------------------------------------------------------------------------------------------------------------------------------------------------------------------------------------------------------------------------------------------------------------------------------------------------|
| NGO1993 | 0.1903 | 2.08 | up | 0.6483 | 1.27  | up   | 0.2444 | 1.46  | up   | hypothetical protein\ Context:(NC_002946)+[1965976-1967397]\ Notes:Best Blastp Hit: emb CAB83651.1  (AL162752) cysteinyl-tRNA synthetase [Neisseria meningitidis] COG0215 Cysteinyl-tRNA synthetase                                                                                                                                                                                                                          |
| NGO1994 | 0.0266 | 5.58 | up | 0.0866 | 2.95  | up   | 0.8729 | 1.06  | up   | putative exodeoxyribonuclease\<br>Context:(NC_002946)+[1967568-1968347]\ Notes:Best Blastp Hit: pir   H81009 exodeoxyribonuclease NMB2082 [imported] - Neisseria meningitidis (group B strain MD58; group A strain Z2491) >gi 7227344 gb AAF42400.1  (AE002557) exodeoxyribonuclease [Neisseria meningitidis MC58] >gi 7379103 emb CAB83652.1  (AL162752) putative nuclease [Neisseria meningitidis] COG0708 Exonuclease III |
| NGO1995 | 0.1389 | 2.87 | up | 0.9889 | -1.01 | down | 0.9751 | -1.02 | down | hypothetical protein\ Context:(NC_002946)+[1968334-1968678]\ Notes:Best Blastp Hit: pir   G81009 hypothetical protein NMB2081 [imported] - Neisseria meningitidis (group B strain MD58) >gi 7227343 gb AAF42399.1  (AE002557) hypothetical protein [Neisseria meningitidis MC58]                                                                                                                                             |
| NGO1996 | 0.0618 | 3.67 | up | 0.1930 | 3.12  | up   | 0.3999 | -1.36 | down | hypothetical protein\ Context:(NC_002946)+[1968688-1969218]\ Notes:Best Blastp Hit: pir   C82031 hypothetical protein NMA0350 [imported] - Neisseria meningitidis (group A strain Z2491) >gi 7379105 emb CAB83654.1  (AL162752) hypothetical protein NMA0350 [Neisseria meningitidis]                                                                                                                                        |
| NGO1997 | 0.4408 | 1.49 | up | 0.8022 | -1.13 | down | 0.9595 | -1.02 | down | aspartate-semialdehyde dehydrogenase\<br>Context:(NC_002946)-[1969311-1970426]\ Notes:catalyzes the formation of 4-aspartyl phosphate from aspartate 4-semialdehyde                                                                                                                                                                                                                                                          |
| NGO1998 | 0.5469 | 1.34 | up | 0.8820 | -1.07 | down | 0.7102 | -1.11 | down | hypothetical protein\ Context:(NC_002946)+[1970601-1971182]\ Notes:Best Blastp Hit: pir   D81009 conserved hypothetical protein NMB2078 [imported] - Neisseria meningitidis (group B strain MD58) >gi 7227340 gb AAF42396.1  (AE002557) conserved hypothetical protein [Neisseria meningitidis MC58]                                                                                                                         |

|         |        |       |      |        |        |      |        |       |      |                                                                                                                                                                                                                                                                                                                                                                                                                                                                          |
|---------|--------|-------|------|--------|--------|------|--------|-------|------|--------------------------------------------------------------------------------------------------------------------------------------------------------------------------------------------------------------------------------------------------------------------------------------------------------------------------------------------------------------------------------------------------------------------------------------------------------------------------|
| NGO1999 | 0.0819 | -2.69 | down | 0.3772 | -1.55  | down | 0.1927 | -2.91 | down | hypothetical protein\ Context:(NC_002946)-[1971244-1972098]\ Notes:Best Blastp Hit: pir    F82031 methylenetetrahydrofolate dehydrogenase (NADP+) (EC 1.5.1.5) / methenyltetrahydrofolate cyclohydrolase (EC 3.5.4.9) NMA0354 [similarity] - Neisseria meningitidis (group A strain Z2491) >gi 7379108 emb CAB83657.1  (AL162752) methylenetetrahydrofolate dehydrogenase/cyclohydrolase [Neisseria meningitidis] COG0190 5;10-methylene-tetrahydrofolate                |
| NGO2000 | 0.5408 | -1.34 | down | 0.2803 | -1.77  | down | 0.3752 | -1.33 | down | putative transferase\ Context:(NC_002946)+[1972738-1973244]\ Notes:Best Blastp Hit: pir    G82031 probable transferase NMA0356 [imported] - Neisseria meningitidis (group A strain Z2491) >gi 7379109 emb CAB83658.1  (AL162752) putative transferase [Neisseria meningitidis] COG0615 Predicted cytidyltransferases                                                                                                                                                     |
| NGO2001 | 0.3254 | 1.84  | up   | 0.3922 | 1.45   | up   | 0.7544 | 1.09  | up   | bifunctional biotin--[acetyl-CoA-carboxylase] ligase/pantothenate kinase\ Context:(NC_002946)+[1973241-1975019]\ Notes:activates biotin to form biotinyl-5'-adenylate and transfers the biotin moiety to biotin-accepting proteins and catalyzes the formation of (R)-4'-phosphopantothenate from (R)-pantothenate in coenzyme A biosynthesis; type III; type III pantothenate kinases are not subject to feedback inhibition from coenzyme A and have a high Km for ATP |
| NGO2002 | 0.7511 | 1.16  | up   | 0.2512 | 1.47   | up   | 0.4942 | 1.20  | up   | hypothetical protein\ Context:(NC_002946)+[1975132-1975956]\ Notes:Best Blastp Hit: pir    A82032 probable periplasmic protein NMA0358 [imported] - Neisseria meningitidis (group A strain Z2491) >gi 7379111 emb CAB83660.1  (AL162752) putative periplasmic protein [Neisseria meningitidis]                                                                                                                                                                           |
| NGO2003 | 0.1030 | 5.33  | up   | 0.1445 | -4.70  | down | 0.2183 | -6.89 | down | hypothetical protein\ Context:(NC_002946)-[1976165-1976287]\ Notes:Best Blastp Hit: gb AAF42392.1  (AE002557) hypothetical protein [Neisseria meningitidis] MC58]                                                                                                                                                                                                                                                                                                        |
| NGO2004 | 0.2717 | -3.52 | down | 0.0248 | -15.46 | down | 0.7364 | 1.85  | up   | hypothetical protein\ Context:(NC_002946)+[1976422-1976658]\ Notes:                                                                                                                                                                                                                                                                                                                                                                                                      |

|         |        |        |      |        |        |      |        |        |      |                                                                                                                                                                                                                                                                                                                                                                                                                   |
|---------|--------|--------|------|--------|--------|------|--------|--------|------|-------------------------------------------------------------------------------------------------------------------------------------------------------------------------------------------------------------------------------------------------------------------------------------------------------------------------------------------------------------------------------------------------------------------|
| NGO2005 | 0.5135 | 1.51   | up   | 0.2663 | -2.81  | down | 0.2893 | -2.75  | down | thiazole synthase\ Context:(NC_002946)-[1976689-1977477]\ Notes:functions in thiamine (vitamin B1) biosynthesis; in Bacillus subtilis this enzyme catalyzes the formation of thiazole from dehydroxyglycine and 1-deoxy-D-xylulose-5-phosphate and ThiS-thiocarboxylate                                                                                                                                           |
| NGO2006 | 0.0762 | -6.04  | down | 0.0270 | -23.18 | down | 0.7746 | -1.64  | down | hypothetical protein\ Context:(NC_002946)-[1977556-1977750]\ Notes:Best Blastp Hit: emb CAB83663.1  (AL162752) hypothetical protein NMA0362 [Neisseria meningitidis]                                                                                                                                                                                                                                              |
| NGO2007 | 0.6671 | -1.37  | down | 0.1165 | -3.73  | down | 0.7165 | 1.36   | up   | putative thiamin-phosphate pyrophosphorylase\ Context:(NC_002946)-[1978172-1978789]\ Notes:Best Blastp Hit: gb AAF42388.1  (AE002556) thiamin-phosphate pyrophosphorylase [Neisseria meningitidis MC58] COG0352 Thiamine monophosphate synthase                                                                                                                                                                   |
| NGO2008 | 0.5807 | 1.64   | up   | 0.1416 | -5.49  | down | 0.8298 | -1.28  | down | putative oxidoreductase\ Context:(NC_002946)-[1978811-1979911]\ Notes:Best Blastp Hit: gb AAF42387.1  (AE002556) D-amino acid oxidase flavoprotein; putative [Neisseria meningitidis MC58] COG0665 Predicted oxidoreductases                                                                                                                                                                                      |
| NGO2009 | 0.0029 | -7.72  | down | 0.0212 | -9.65  | down | 0.2298 | -2.24  | down | putative permease protein\ Context:(NC_002946)-[1979908-1981134]\ Notes:Best Blastp Hit: gb AAF42386.1  (AE002556) conserved hypothetical protein [Neisseria meningitidis MC58] COG1457 Purine-cytosine permease and related                                                                                                                                                                                      |
| NGO2010 | 0.4183 | -1.43  | down | 0.5675 | -1.30  | down | 0.8500 | -1.14  | down | hypothetical protein\ Context:(NC_002946)+[1981421-1982863]\ Notes:Best Blastp Hit: pir A82033 TLDD protein homolog NMA0367 [imported] - Neisseria meningitidis (group A strain Z2491) >gi 7379119 emb CAB83668.1  (AL162752) TLDD protein homolog [Neisseria meningitidis] COG0312 Predicted Zn-dependent proteases and their                                                                                    |
| NGO2011 | 0.0027 | -20.20 | down | 0.0013 | -29.62 | down | 0.0110 | -23.99 | down | putative ABC transporter; permease protein; amino acid\ Context:(NC_002946)+[1983007-1983666]\ Notes:Best Blastp Hit: pir F81391 amino-acid ABC transporter integral membrane protein Cj0467 [imported] - Campylobacter jejuni (strain NCTC 11168) >gi 6967938 emb CAB75105.1  (AL139075) amino-acid ABC transporter integral membrane protein [Campylobacter jejuni] COG0765 Amino acid ABC transporter permease |

|         |        |        |      |        |        |      |        |       |      |                                                                                                                                                                                                                                                                                                                                                                                                                                           |
|---------|--------|--------|------|--------|--------|------|--------|-------|------|-------------------------------------------------------------------------------------------------------------------------------------------------------------------------------------------------------------------------------------------------------------------------------------------------------------------------------------------------------------------------------------------------------------------------------------------|
| NGO2012 | 0.0015 | -16.71 | down | 0.0030 | -59.64 | down | 0.1105 | -8.73 | down | putative ABC transporter; permease protein; amino acid\<br>Context:(NC_002946)+[1983656-1984324]\ Notes:Best<br>Blastp Hit: pir     B64666 glutamine ABC transporter;<br>permease protein - Helicobacter pylori (strain 26695)<br>>gi 2314329 gb AAD08216.1  (AE000623) glutamine ABC<br>transporter; permease protein (glnP) [Helicobacter pylori<br>26695] COG0765 Amino acid ABC transporter permease                                  |
| NGO2013 | 0.0309 | -4.47  | down | 0.0584 | -3.84  | down | 0.0478 | -6.28 | down | putative ABC transporter; ATP-binding protein; amino acid\<br>Context:(NC_002946)+[1984326-1985057]\ Notes:Best<br>Blastp Hit: pir     H81391 amino-acid ABC transporter ATP-<br>binding protein Cj0469 [imported] - Campylobacter jejuni<br>(strain NCTC 11168) >gi 6967940 emb CAB75107.1 <br>(AL139075) amino-acid ABC transporter ATP-binding<br>protein [Campylobacter jejuni] COG1126 ABC-type polar<br>amino acid transport system |
| NGO2014 | 0.7049 | -1.21  | down | 0.4680 | -1.39  | down | 0.5831 | -1.17 | down | putative ABC transporter; periplasmic binding protein;<br>amino acid\<br>Context:(NC_002946)+[1985170-1986024]\<br>Notes:Best Blastp Hit: gb AAD26123.1  (AF109148)<br>antigenic protein [Actinobacillus pleuropneumoniae]<br>COG0834 Periplasmic amino acid binding proteins                                                                                                                                                             |
| NGO2015 | 0.0006 | -13.80 | down | 0.0421 | -6.71  | down | 0.0501 | -7.76 | down | hypothetical protein\<br>Context:(NC_002946)+[1986403-<br>1987260]\ Notes:Best Blastp Hit: gb AAF42384.1 <br>(AE002556) hemK protein [Neisseria meningitidis MC58]<br>COG0500 SAM-dependent methyltransferases                                                                                                                                                                                                                            |
| NGO2016 | 0.0156 | -4.24  | down | 0.0239 | -5.42  | down | 0.0149 | -5.76 | down | hypothetical protein\<br>Context:(NC_002946)+[1987346-<br>1988734]\ Notes:Best Blastp Hit: pir     D81010 conserved<br>hypothetical protein NMB2064 [imported] - Neisseria<br>meningitidis (group B strain MD58)<br>>gi 7227326 gb AAF42383.1  (AE002556) conserved<br>hypothetical protein [Neisseria meningitidis MC58]<br>COG2056 Predicted permease                                                                                   |
| NGO2017 | 0.5679 | -1.45  | down | 0.1351 | -1.87  | down | 0.0853 | -1.63 | down | hypothetical protein\<br>Context:(NC_002946)+[1988735-<br>1988959]\ Notes:Best Blastp Hit: gb AAF42382.1 <br>(AE002556) slyX protein; putative [Neisseria meningitidis<br>MC58]                                                                                                                                                                                                                                                           |
| NGO2018 | 0.9553 | 1.03   | up   | 0.5617 | -1.28  | down | 0.2691 | -1.44 | down | hypothetical protein\<br>Context:(NC_002946)+[1989067-<br>1989261]\ Notes:                                                                                                                                                                                                                                                                                                                                                                |

|         |        |       |      |        |       |      |        |       |      |                                                                                                                                                                                                                                                                                                                     |
|---------|--------|-------|------|--------|-------|------|--------|-------|------|---------------------------------------------------------------------------------------------------------------------------------------------------------------------------------------------------------------------------------------------------------------------------------------------------------------------|
| NGO2019 | 0.0151 | -3.98 | down | 0.0421 | -3.86 | down | 0.0670 | -2.57 | down | hypothetical protein\ Context:(NC_002946)-[1989359-1990129]\ Notes:Best Blastp Hit: pir   B81010 thiF protein NMB2062 [imported] - Neisseria meningitidis (group B strain MD58) >gi 7227324 gb AAF42381.1  (AE002556) thiF protein [Neisseria meningitidis MC58] COG0476 Dinucleotide-utilizing enzymes involved in |
| NGO2020 | 0.1073 | 2.90  | up   | 0.0741 | 6.10  | up   | 0.0357 | 2.49  | up   | phosphoenolpyruvate carboxylase\ Context:(NC_002946)+[1990296-1992998]\ Notes:catalyzes the formation of oxaloacetate from phosphoenolpyruvate                                                                                                                                                                      |
| NGO2021 | 0.7081 | 1.20  | up   | 0.9507 | -1.03 | down | 0.9062 | 1.04  | up   | putative glycerol-3-phosphate dehydrogenase\ Context:(NC_002946)+[1993121-1994110]\ Notes:Best Blastp Hit: gb AAF62339.1  (AE002555) glycerol-3-phosphate dehydrogenase (NAD+) [Neisseria meningitidis MC58] COG0240 Glycerol 3-phosphate dehydrogenase                                                             |
| NGO2022 | 0.6224 | 1.31  | up   | 0.7020 | 1.17  | up   | 0.2554 | 1.42  | up   | hypothetical protein\ Context:(NC_002946)+[1994164-1994493]\ Notes:Best Blastp Hit: pir   F81953 hypothetical protein NMA0376 [imported] - Neisseria meningitidis (group A strain Z2491) >gi 7379129 emb CAB83677.1  (AL162753) hypothetical protein NMA0376 [Neisseria meningitidis]                               |
| NGO2023 | 0.5367 | 1.32  | up   | 0.7006 | 1.16  | up   | 0.7880 | 1.07  | up   | hypothetical protein\ Context:(NC_002946)+[1994504-1994809]\ Notes:Best Blastp Hit: gb AAF42378.1  (AE002555) conserved hypothetical protein [Neisseria meningitidis MC58] >gi 7379130 emb CAB83678.1  (AL162753) hypothetical protein NMA0377 [Neisseria meningitidis]                                             |
| NGO2024 | 0.0756 | 3.13  | up   | 0.3374 | 1.47  | up   | 0.4640 | 1.30  | up   | 50S ribosomal protein L13\ Context:(NC_002946)+[1995172-1995603]\ Notes:in Escherichia coli this protein is one of the earliest assembly proteins in the large subunit                                                                                                                                              |
| NGO2025 | 0.1923 | 2.18  | up   | 0.4182 | 1.44  | up   | 0.5219 | 1.25  | up   | 30S ribosomal protein S9\ Context:(NC_002946)+[1995616-1996008]\ Notes:forms a direct contact with the tRNA during translation                                                                                                                                                                                      |
| NGO2026 | 0.1732 | -9.16 | down | 0.3588 | -6.73 | down | 0.3735 | 4.91  | up   | hypothetical protein\ Context:(NC_002946)-[1996389-1996883]\ Notes:                                                                                                                                                                                                                                                 |



|         |        |       |      |        |       |      |        |       |      |                                                                                                                                                                                                                                                                                                                                                                                                                                     |
|---------|--------|-------|------|--------|-------|------|--------|-------|------|-------------------------------------------------------------------------------------------------------------------------------------------------------------------------------------------------------------------------------------------------------------------------------------------------------------------------------------------------------------------------------------------------------------------------------------|
| NGO2027 | 0.4545 | 1.57  | up   | 0.1065 | -2.94 | down | 0.4724 | -1.58 | down | MetR\ Context:(NC_002946)-[1997076-1998005]\<br>Notes:Best Blastp Hit: pir   H81011 transcription regulator;<br>LysR family NMB2055 [imported] - Neisseria meningitidis<br>(group B strain MD58) >gi 7227317 gb AAF42375.1 <br>(AE002555) transcriptional regulator; LysR family [Neisseria<br>meningitidis MC58] COG0583 Transcriptional regulators;<br>LysR family; putative methionine biosynthesis<br>transcriptional regulator |
| NGO2028 | 0.0715 | 5.28  | up   | 0.3115 | 1.77  | up   | 0.4695 | -1.43 | down | hypothetical protein\ Context:(NC_002946)+[1998134-<br>1998883]\ Notes:Best Blastp Hit: pir   D81954 hypothetical<br>protein NMA0382 [imported] - Neisseria meningitidis<br>(group A strain Z2491) >gi 7379135 emb CAB83683.1 <br>(AL162753) hypothetical protein NMA0382 [Neisseria<br>meningitidis] COG0327 Uncharacterized ACR; Ybgl/Acr<br>family                                                                               |
| NGO2029 | 0.5016 | -1.43 | down | 0.3915 | -1.50 | down | 0.1797 | -1.60 | down | PetA\ Context:(NC_002946)+[1999006-1999587]\<br>Notes:Best Blastp Hit: gb AAF42373.1  (AE002555)<br>ubiquinol--cytochrome c reductase; iron-sulfur subunit<br>[Neisseria meningitidis MC58]<br>>gi 7379136 emb CAB83684.1  (AL162753) ubiquinol-<br>cytochrome c reductase iron-sulfur subunit [Neisseria<br>meningitidis] COG0723 Rieske Fe-S protein; putative<br>ubiquinol--cytochrome c reductase iron-sulfur subunit           |
| NGO2030 | 0.1633 | -2.02 | down | 0.3601 | -1.46 | down | 0.1707 | -1.63 | down | PetB\ Context:(NC_002946)+[1999606-2000955]\<br>Notes:Best Blastp Hit: pir   F81954 ubiquinol--cytochrome-c<br>reductase (EC 1.10.2.2) cytochrome b NMA0384 [similarity]<br>Neisseria meningitidis (group A strain Z2491)<br>>gi 7379137 emb CAB83685.1  (AL162753) cytochrome B<br>[Neisseria meningitidis] COG1290 Cytochrome b (b6-like);<br>putative cytochrome B                                                               |
| NGO2031 | 0.5306 | -1.43 | down | 0.8580 | -1.08 | down | 0.1433 | -2.08 | down | PetC\ Context:(NC_002946)+[2000970-2001758]\<br>Notes:Best Blastp Hit: emb CAB83686.1  (AL162753)<br>cytochrome C1 precursor [Neisseria meningitidis]; putative<br>cytochrome C1 precursor                                                                                                                                                                                                                                          |

|         |        |       |      |        |       |      |        |       |      |                                                                                                                                                                                                                                                                                                                                                                                                                            |
|---------|--------|-------|------|--------|-------|------|--------|-------|------|----------------------------------------------------------------------------------------------------------------------------------------------------------------------------------------------------------------------------------------------------------------------------------------------------------------------------------------------------------------------------------------------------------------------------|
| NGO2032 | 0.0964 | -4.17 | down | 0.0922 | -2.53 | down | 0.0405 | -2.90 | down | hypothetical protein\ Context:(NC_002946)+[2002090-2003880]\ Notes:Best Blastp Hit: gb AAF42370.1  (AE002555) conserved hypothetical protein [Neisseria meningitidis MC58] COG1322 Uncharacterized BCR; YigN family                                                                                                                                                                                                        |
| NGO2033 | 0.0496 | -4.24 | down | 0.0024 | -4.89 | down | 0.0711 | -2.55 | down | putative hydrolase\ Context:(NC_002946)-[2003947-2004579]\ Notes:Best Blastp Hit: pir   A81955 probable hydrolase NMA0387 [imported] - Neisseria meningitidis (group A strain Z2491) >gi 7379140 emb  CAB83688.1  (AL162753) putative hydrolase [Neisseria meningitidis] COG0491 Zn-dependent hydrolases                                                                                                                   |
| NGO2034 | 0.5368 | -1.91 | down | 0.0202 | -8.96 | down | 0.5434 | -1.83 | down | DNA ligase\ Context:(NC_002946)+[2004672-2005496]\ Notes:catalyzes the formation of a phosphodiester at the site of a single-strand break in duplex DNA                                                                                                                                                                                                                                                                    |
| NGO2035 | 0.4143 | 1.49  | up   | 0.4725 | -1.36 | down | 0.7380 | -1.10 | down | hypoxanthine-guanine phosphoribosyltransferase\ Context:(NC_002946)+[2005565-2006128]\ Notes:Catalyzes the salvage synthesis of inosine-5'-monophosphate (IMP) and guanosine-5'-monophosphate (GMP) from the purine bases hypoxanthine and guanine; respectively                                                                                                                                                           |
| NGO2036 | 0.3002 | 1.77  | up   | 0.1495 | -2.12 | down | 0.4525 | -1.61 | down | putative sugar transport PTS system IIA protein\ Context:(NC_002946)+[2006212-2006649]\ Notes:Best Blastp Hit: emb CAB83691.1  (AL162753) sugar transport PTS system IIA component [Neisseria meningitidis]                                                                                                                                                                                                                |
| NGO2037 | 0.4171 | 1.45  | up   | 0.9125 | 1.03  | up   | 0.1726 | -1.88 | down | PtsH\ Context:(NC_002946)+[2006870-2007139]\ Notes:Best Blastp Hit: pir   A81013 sugar transport PTS system phosphocarrier protein HPR NMA0391 [imported] - Neisseria meningitidis (group B strain MD58; group A strain Z2491) >gi 7227306 gb AAF42365.1  (AE002554) phosphocarrier protein HPr [Neisseria meningitidis MC58] >gi 7379144 emb CAB83692.1  (AL162753) sugar transport PTS system phosphocarrier protein HPR |

|         |        |       |      |        |        |      |        |       |      |                                                                                                                                                                                                                                                                                                                                                                                                                               |
|---------|--------|-------|------|--------|--------|------|--------|-------|------|-------------------------------------------------------------------------------------------------------------------------------------------------------------------------------------------------------------------------------------------------------------------------------------------------------------------------------------------------------------------------------------------------------------------------------|
| NGO2038 | 0.8866 | -1.07 | down | 0.6039 | 1.18   | up   | 0.2819 | 1.35  | up   | Pts\ Context:(NC_002946)+[2007139-2008914]\ Notes:Best Blastp Hit: pir    H81012 phosphoenolpyruvate-protein phosphotransferase NMB2044 [imported] - Neisseria meningitidis (group B strain MD58) >gi 7227305 gb AAF42364.1  (AE002554) phosphoenolpyruvate-protein phosphotransferase [Neisseria meningitidis MC58] COG1080 Phosphoenolpyruvate-protein kinase (PTS; putative phosphoenolpyruvate-protein phosphotransferase |
| NGO2039 | 0.9845 | 1.01  | up   | 0.5214 | -1.32  | down | 0.8977 | 1.04  | up   | putative ABC transporter; ATP-binding protein; amino acid\ Context:(NC_002946)-[2009041-2009982]\ Notes:Best Blastp Hit: emb CAB83694.1  (AL162753) ABC-transport system ATP-binding protein [Neisseria meningitidis] COG1128 ABC-type spermidine/putrescine transport                                                                                                                                                        |
| NGO2040 | 0.5945 | 1.28  | up   | 0.4176 | 1.35   | up   | 0.9972 | 1.00  | up   | hypothetical protein\ Context:(NC_002946)-[2009991-2010866]\ Notes:Best Blastp Hit: pir    F81012 thiamin pyrophosphokinase-related protein NMB2041 [imported] - Neisseria meningitidis (group B strain MD58) >gi 7227303 gb AAF42362.1  (AE002554) thiamin pyrophosphokinase-related protein [Neisseria meningitidis MC58]                                                                                                   |
| NGO2041 | 0.1130 | -3.21 | down | 0.0132 | -16.45 | down | 0.5864 | -1.35 | down | thiamine biosynthesis protein ThiC\ Context:(NC_002946)+[2011464-2013365]\ Notes:required for the synthesis of the hydromethylpyrimidine moiety of thiamine                                                                                                                                                                                                                                                                   |
| NGO2042 | 0.9203 | 1.05  | up   | 0.8703 | -1.08  | down | 0.9412 | -1.02 | down | hypothetical protein\ Context:(NC_002946)+[2015247-2015468]\ Notes:                                                                                                                                                                                                                                                                                                                                                           |
| NGO2043 | 0.5427 | 1.44  | up   | 0.0200 | -2.71  | down | 0.8329 | -1.20 | down | putative dehydrogenase related protein\ Context:(NC_002946)+[2017051-2017365]\ Notes:Best Blastp Hit: pir    F82022 probable glycerate dehydrogenase (EC 1.1.1.29) NMA0274 [imported] - Neisseria meningitidis (group A strain Z2491) >gi 7379036 emb CAB83582.1  (AL162752) putative glycerate dehydrogenase [Neisseria meningitidis] COG1052 Lactate dehydrogenase and related                                              |

|         |        |       |      |        |       |      |        |       |      |                                                                                                                                                                                                                                                                                                                                                                                                       |
|---------|--------|-------|------|--------|-------|------|--------|-------|------|-------------------------------------------------------------------------------------------------------------------------------------------------------------------------------------------------------------------------------------------------------------------------------------------------------------------------------------------------------------------------------------------------------|
| NGO2044 | 0.0046 | 5.68  | up   | 0.0616 | 9.31  | up   | 0.1040 | 3.05  | up   | methionyl-tRNA synthetase\ Context:(NC_002946)-[2017440-2019494]\ Notes:methionine--tRNA ligase; MetRS; adds methionine to tRNA(Met) with cleavage of ATP to AMP and diphosphate; some MetRS enzymes form dimers depending on a C-terminal domain that is also found in other proteins such as Trbp111 in Aquifex aeolicus and the cold-shock protein CsaA from Bacillus subtilis while others do not |
| NGO2045 | 0.6100 | 1.27  | up   | 0.6729 | -1.19 | down | 0.4742 | 1.30  | up   | D-fructose-6-phosphate amidotransferase\ Context:(NC_002946)-[2019610-2021448]\ Notes:Catalyzes the first step in hexosamine metabolism; converting fructose-6P into glucosamine-6P using glutamine as a nitrogen source                                                                                                                                                                              |
| NGO2046 | 0.4030 | 2.05  | up   | 0.2327 | -2.97 | down | 0.4588 | 1.69  | up   | hypothetical protein\ Context:(NC_002946)+[2021482-2021670]\ Notes:                                                                                                                                                                                                                                                                                                                                   |
| NGO2047 | 0.1043 | 4.37  | up   | 0.8665 | 1.16  | up   | 0.8350 | -1.25 | down | hypothetical protein\ Context:(NC_002946)+[2021721-2022242]\ Notes:Best Blastp Hit: possibly phase variable - 9A residue homopolymer repeat in the coding sequence (ON)                                                                                                                                                                                                                               |
| NGO2048 | 0.2183 | -2.17 | down | 0.0896 | -2.25 | down | 0.0352 | -2.61 | down | GNA33)\ Context:(NC_002946)-[2022525-2023850]\ Notes:Best Blastp Hit: gb AAF44779.1 AF235145_1 (AF235145) GNA33 [Neisseria gonorrhoeae]; genome-derived Neisserial antigen 33                                                                                                                                                                                                                         |
| NGO2050 | 0.8046 | 1.25  | up   | 0.7628 | 1.10  | up   | 0.4234 | 1.58  | up   | hypothetical protein\ Context:(NC_002946)+[2024900-2026066]\ Notes:Best Blastp Hit: pir E81244 conserved hypothetical protein NMB0035 [imported] - Neisseria meningitidis (group B strain MD58)<br>>gi 7225255 gb AAF40506.1  (AE002362) conserved hypothetical protein [Neisseria meningitidis MC58]                                                                                                 |
| NGO2051 | 0.9724 | -1.03 | down | 0.1339 | -2.21 | down | 0.7647 | -1.17 | down | hypothetical protein\ Context:(NC_002946)+[2026373-2027638]\ Notes:Best Blastp Hit: pir F81244 conserved hypothetical protein NMB0036 [imported] - Neisseria meningitidis (group B strain MD58)<br>>gi 7225256 gb AAF40507.1  (AE002362) conserved hypothetical protein [Neisseria meningitidis MC58]                                                                                                 |
| NGO2052 | 0.6043 | 1.28  | up   | 0.6389 | 1.37  | up   | 0.6843 | 1.34  | up   | PhnA\ Context:(NC_002946)-[2027710-2028039]\ Notes:Best Blastp Hit: pir G81244 phnA protein NMB0037 [imported] - Neisseria meningitidis (group B strain MD58)<br>>gi 7225257 gb AAF40508.1  (AE002362) phnA protein [Neisseria meningitidis MC58]; alkylphosphonate uptake protein                                                                                                                    |

|         |        |       |      |        |        |      |        |       |      |                                                                                                                                                                                                                                                                                                                                                                                                                                                                                             |
|---------|--------|-------|------|--------|--------|------|--------|-------|------|---------------------------------------------------------------------------------------------------------------------------------------------------------------------------------------------------------------------------------------------------------------------------------------------------------------------------------------------------------------------------------------------------------------------------------------------------------------------------------------------|
| NGO2053 | 0.2969 | 1.76  | up   | 0.1284 | 2.50   | up   | 0.4418 | 1.52  | up   | UDP-N-acetylglucosamine pyrophosphorylase\<br>Context:(NC_002946)-[2028114-2029484]\ Notes:Best<br>Blastp Hit: sp Q50986 GLMU_NEIGO UDP-N-<br>acetylglucosamine pyrophosphorylase (N-<br>acetylglucosamine-1-phosphate uridylyltransferase)<br>>gi 975206 emb CAA90326.1  (Z50023) uridylyltransferase<br>[Neisseria gonorrhoeae] COG1207                                                                                                                                                   |
| NGO2054 | 0.2549 | -1.74 | down | 0.6535 | -1.24  | down | 0.9521 | -1.02 | down | hypothetical protein\<br>Context:(NC_002946)-[2029539-<br>2029811]\ Notes:Best Blastp Hit: gb AAF40510.1 <br>(AE002362) hypothetical protein [Neisseria meningitidis<br>MC58]                                                                                                                                                                                                                                                                                                               |
| NGO2055 | 0.1259 | -3.95 | down | 0.0163 | -14.50 | down | 0.0101 | -9.62 | down | putative hydrolase\<br>Context:(NC_002946)-[2029787-<br>2030515]\ Notes:Best Blastp Hit: emb CAB83593.1 <br>(AL162752) possible hydrolase [Neisseria meningitidis]<br>COG1011 Predicted hydrolases of the HAD superfamily                                                                                                                                                                                                                                                                   |
| NGO2056 | 0.2861 | 1.67  | up   | 0.8787 | 1.08   | up   | 0.4173 | 1.26  | up   | putative ABC transporter; thiamine-binding periplasmic<br>protein\<br>Context:(NC_002946)+[2030574-2031575]\<br>Notes:Best Blastp Hit: emb CAB83594.1  (AL162752)<br>putative thiamin-binding periplasmic protein [Neisseria<br>meningitidis] COG1840 Thiamine-binding periplasmic<br>proteins                                                                                                                                                                                              |
| NGO2057 | 0.4330 | 1.49  | up   | 0.5827 | -1.29  | down | 0.9555 | 1.02  | up   | hypothetical protein\<br>Context:(NC_002946)+[2031669-<br>2032517]\ Notes:Best Blastp Hit: pir D81245 conserved<br>hypothetical protein NMB0042 [imported] - Neisseria<br>meningitidis (group B strain MD58)<br>>gi 7225262 gb AAF40513.1  (AE002362) conserved<br>hypothetical protein [Neisseria meningitidis MC58]<br>COG0668 Uncharacterized ACR; integral membrane                                                                                                                     |
| NGO2058 | 0.0124 | -4.34 | down | 0.0033 | -17.53 | down | 0.1203 | -2.95 | down | hypothetical protein\<br>Context:(NC_002946)+[2032543-<br>2033025]\ Notes:Best Blastp Hit: pir E81245 conserved<br>hypothetical protein NMB0043 [imported] - Neisseria<br>meningitidis (group B strain MD58; group A strain Z2491)<br>>gi 7225263 gb AAF40514.1  (AE002362) conserved<br>hypothetical protein [Neisseria meningitidis MC58]<br>>gi 7379050 emb CAB83596.1  (AL162752) hypothetical<br>protein NMA0289 [Neisseria meningitidis] COG1546<br>Uncharacterized protein CinA/YgaD |

|         |        |       |      |        |        |      |        |       |      |                                                                                                                                                                                                                                                                                                                                                                                                                                                 |
|---------|--------|-------|------|--------|--------|------|--------|-------|------|-------------------------------------------------------------------------------------------------------------------------------------------------------------------------------------------------------------------------------------------------------------------------------------------------------------------------------------------------------------------------------------------------------------------------------------------------|
| NGO2059 | 0.2672 | -1.94 | down | 0.0050 | -13.07 | down | 0.0611 | -3.33 | down | trifunctional thioredoxin/methionine sulfoxide reductase A/B protein\ Context:(NC_002946)-[2033109-2034677]\<br>Notes:this is a fusion of 3 domains; an N-terminal thioredoxin domain; and 2 domains at the C-terminus that are methionine sulfoxide reductases; MsrA and MsrB; methionine is modified to form methionine sulfoxide during normal cellular processes and due to oxidat                                                          |
| NGO2060 | 0.6771 | 1.20  | up   | 0.4917 | 1.31   | up   | 0.9905 | 1.00  | up   | putative signal recognition particle protein\<br>Context:(NC_002946)+[2034823-2036088]\ Notes:Best Blastp Hit: sp P14929 PILA_NEIGO probably signal recognition particle protein (DOCKING protein) COG0552<br>Signal recognition particle GTPase FtsY                                                                                                                                                                                           |
| NGO2065 | 0.7987 | -1.17 | down | 0.9713 | 1.02   | up   | 0.2369 | 1.42  | up   | UDP-3-O-[3-hydroxymyristoyl] N-acetylglucosamine deacetylase\ Context:(NC_002946)-[2039365-2040288]\<br>Notes:zinc-dependent; catalyzes the deacetylation of UDP-(3-O-acyl)-N-acetylglucosamine to UDP-3-O-(3-hydroxytetradecanoyl)-glucosamine in the second step of lipid A biosynthesis                                                                                                                                                      |
| NGO2068 | 0.4038 | -1.86 | down | 0.0952 | -4.39  | down | 0.3782 | -1.45 | down | hypothetical protein\ Context:(NC_002946)-[2046714-2047403]\ Notes:Best Blastp Hit: gb AAF42356.1  (AE002553) conserved hypothetical protein [Neisseria meningitidis MC58] COG1451 Predicted metal-dependent hydrolase                                                                                                                                                                                                                          |
| NGO2069 | 0.9395 | 1.05  | up   | 0.3129 | -2.14  | down | 0.5421 | -1.35 | down | NlaB\ Context:(NC_002946)-[2047400-2048143]\<br>Notes:Best Blastp Hit: pir    G81013 1-acyl-sn-glycerol-3-phosphate acyltransferase; probable NMB2034 [imported] - Neisseria meningitidis (group B strain MD58)<br>>gi 7227295 gb AAF42355.1  (AE002553) 1-acyl-sn-glycerol-3-phosphate acyltransferase; putative [Neisseria meningitidis MC58] COG0204 1-acyl-sn-glycerol-3-phosphate; putative 1-acyl-SN-glycerol-3-phosphate acyltransferase |
| NGO2070 | 0.5753 | 1.35  | up   | 0.8813 | -1.06  | down | 0.9675 | -1.01 | down | D;D-heptose 1;7-bisphosphate phosphatase\<br>Context:(NC_002946)-[2048173-2048736]\ Notes:Converts the D-glycero-beta-D-manno-heptose 1;7-bisphosphate intermediate into D-glycero-beta-D-manno-heptose 1-phosphate                                                                                                                                                                                                                             |

|         |        |       |      |        |       |      |        |       |      |                                                                                                                                                                                                                                                                                                                                                                                                                                                                           |
|---------|--------|-------|------|--------|-------|------|--------|-------|------|---------------------------------------------------------------------------------------------------------------------------------------------------------------------------------------------------------------------------------------------------------------------------------------------------------------------------------------------------------------------------------------------------------------------------------------------------------------------------|
| NGO2071 | 0.8033 | 1.27  | up   | 0.7651 | -1.12 | down | 0.8896 | 1.05  | up   | hypothetical protein\ Context:(NC_002946)+[2048879-2050531]\ Notes:Best Blastp Hit: pir     C81957 probable integral membrane protein NMA0408 [imported] - Neisseria meningitidis (group A strain Z2491) >gi 7379158 emb CAB83707.1  (AL162753) putative integral membrane protein [Neisseria meningitidis] COG1368 Phosphoglycerol transferase MdoB and related                                                                                                          |
| NGO2072 | 0.3031 | -2.09 | down | 0.5044 | -1.32 | down | 0.6419 | -1.36 | down | lipooligosaccharide glycosyl transferase G\ Context:(NC_002946)-[2050598-2051653]\ Notes:Best Blastp Hit: possibly phase variable - 11C residue homopolymer repeat in the coding sequence (ON) COG0438 Glycosyltransferases I                                                                                                                                                                                                                                             |
| NGO2073 | 0.2254 | -1.97 | down | 0.0048 | -4.59 | down | 0.7763 | -1.13 | down | TnaB\ Context:(NC_002946)-[2051805-2053046]\ Notes:Best Blastp Hit: pir     E81013 tryptophan transporter NMB2031 [imported] - Neisseria meningitidis (group B strain MD58) >gi 7227293 gb AAF42353.1  (AE002553) tryptophan transporter [Neisseria meningitidis MC58] COG0814 Amino acid permeases; putative tryptophan transport protein; tryptophan permease                                                                                                           |
| NGO2074 | 0.0214 | -4.70 | down | 0.2650 | -1.49 | down | 0.1128 | -2.19 | down | 3-demethylubiquinone-9 3-methyltransferase\ Context:(NC_002946)+[2053194-2053922]\ Notes:Involved in ubiquinone biosynthesis                                                                                                                                                                                                                                                                                                                                              |
| NGO2075 | 0.0087 | -4.94 | down | 0.0682 | -2.68 | down | 0.0730 | -2.64 | down | homoserine kinase\ Context:(NC_002946)+[2053959-2054876]\ Notes:catalyzes the formation of O-phospho-L-homoserine from L-homoserine                                                                                                                                                                                                                                                                                                                                       |
| NGO2076 | 0.6165 | -1.31 | down | 0.1159 | -4.00 | down | 0.3521 | -1.50 | down | putative glucokinase\ Context:(NC_002946)-[2055062-2055580]\ Notes:Best Blastp Hit: pir     G81015 probable gluconokinase (EC 2.7.1.12) NMA0412 [imported] - Neisseria meningitidis (group B strain MD58; group A strain Z2491) >gi 7227290 gb AAF42351.1  (AE002552) thermoresistant gluconokinase [Neisseria meningitidis MC58] >gi 7379162 emb CAB83711.1  (AL162753) putative glucokinase [Neisseria meningitidis] COG0529 Adenylylsulfate kinase and related kinases |

|         |        |       |      |        |        |      |        |       |      |                                                                                                                                                                                                                                                                                                                                                                                                                                                                                                                                                                                   |
|---------|--------|-------|------|--------|--------|------|--------|-------|------|-----------------------------------------------------------------------------------------------------------------------------------------------------------------------------------------------------------------------------------------------------------------------------------------------------------------------------------------------------------------------------------------------------------------------------------------------------------------------------------------------------------------------------------------------------------------------------------|
| NGO2077 | 0.0269 | -8.87 | down | 0.0012 | -40.39 | down | 0.0601 | -4.91 | down | GntP\ Context:(NC_002946)-[2055600-2056985]\<br>Notes:Best Blastp Hit: pir    H81957 probable gluconate permease NMA0413 [imported] - Neisseria meningitidis (group A strain Z2491) >gi 7379163 emb CAB83712.1  (AL162753) putative gluconate permease [Neisseria meningitidis]                                                                                                                                                                                                                                                                                                   |
| NGO2078 | 0.0269 | -5.66 | down | 0.0008 | -31.01 | down | 0.0608 | -6.09 | down | putative ABC transporter; permease protein\<br>Context:(NC_002946)+[2057326-2058918]\ Notes:Best Blastp Hit: gb AAF42349.1  (AE002552) ABC transporter; permease protein [Neisseria meningitidis MC58] COG1178 Uncharacterized transport system; permease                                                                                                                                                                                                                                                                                                                         |
| NGO2079 | 0.0044 | -9.02 | down | 0.0014 | -13.70 | down | 0.0101 | -6.57 | down | putative carbonic anhydrase\<br>Context:(NC_002946)+[2058947-2059546]\ Notes:Best Blastp Hit: pir    D81015 conserved hypothetical protein NMB2025 [imported] - Neisseria meningitidis (group B strain MD58; group A strain Z2491) >gi 7227287 gb AAF42348.1  (AE002552) conserved hypothetical protein [Neisseria meningitidis MC58] >gi 7379165 emb CAB83714.1  (AL162753) hypothetical protein NMA0415 [Neisseria meningitidis] COG0288 Carbonic anhydrase                                                                                                                     |
| NGO2080 | 0.0547 | -2.67 | down | 0.0520 | -3.22  | down | 0.0730 | -3.49 | down | hypothetical protein\ Context:(NC_002946)+[2059543-2060148]\ Notes:Best Blastp Hit: sp P57090 NADD_NEIMB probable nicotinate-nucleotide adenylyltransferase (deamido-NAD(+)) pyrophosphorylase(deamido-NAD(+)) diphosphorylase (nicotinate mononucleotide adenylyltransferase) (NAMN adenylyltransferase) >gi 11278845 pir   C81015 conserved hypothetical protein NMB2024 [imported] - Neisseria meningitidis (group B strain MD58) >gi 7227286 gb AAF42347.1  (AE002552) conserved hypothetical protein [Neisseria meningitidis MC58] COG1057 Predicted nucleotidyltransferases |



|         |        |       |      |        |       |      |        |       |      |                                                                                                                                                                                                                                                                                                                                                                                                                                                                               |
|---------|--------|-------|------|--------|-------|------|--------|-------|------|-------------------------------------------------------------------------------------------------------------------------------------------------------------------------------------------------------------------------------------------------------------------------------------------------------------------------------------------------------------------------------------------------------------------------------------------------------------------------------|
| NGO2081 | 0.3090 | -2.23 | down | 0.7259 | -1.15 | down | 0.3755 | -1.32 | down | hypothetical protein\ Context:(NC_002946)+[2060207-2060593]\ Notes:Best Blastp Hit: gb AAF42346.1  (AE002552) conserved hypothetical protein [Neisseria meningitidis MC58] >gi 7379167 emb CAB83716.1  (AL162753) hypothetical protein NMA0417 [Neisseria meningitidis] COG0799 Uncharacterized ACR (homolog of plant)                                                                                                                                                        |
| NGO2082 | 0.5692 | -1.33 | down | 0.0652 | -1.98 | down | 0.4554 | -1.40 | down | SPOUT methyltransferase superfamily protein\ Context:(NC_002946)+[2060646-2061116]\ Notes:enzyme from Escherichia coli has not been shown to exhibit methyltransferase activity; crystal structure shows homodimer                                                                                                                                                                                                                                                            |
| NGO2083 | 0.2733 | 1.85  | up   | 0.3484 | 1.40  | up   | 0.4895 | 1.30  | up   | hypothetical protein\ Context:(NC_002946)+[2061190-2061456]\ Notes:Best Blastp Hit: gb AAF42344.1  (AE002552) conserved hypothetical protein [Neisseria meningitidis MC58] >gi 7379169 emb CAB83718.1  (AL162753) hypothetical protein NMA0419 [Neisseria meningitidis]                                                                                                                                                                                                       |
| NGO2084 | 0.1292 | 2.43  | up   | 0.1070 | 1.78  | up   | 0.2182 | 1.89  | up   | hypothetical protein\ Context:(NC_002946)+[2061613-2062296]\ Notes:Best Blastp Hit: pir G81014 conserved hypothetical protein NMB2020 [imported] - Neisseria meningitidis (group B strain MD58; group A strain Z2491) >gi 7227282 gb AAF42343.1  (AE002552) conserved hypothetical protein [Neisseria meningitidis MC58] >gi 7379170 emb CAB83719.1  (AL162753) putative integral membrane protein [Neisseria meningitidis] COG0670 Integral membrane protein YccA; interacts |
| NGO2085 | 0.3354 | -2.37 | down | 0.9145 | 1.13  | up   | 0.2660 | -2.80 | down | phosphopantetheine adenyltransferase\ Context:(NC_002946)+[2062426-2062941]\ Notes:Catalyzes the conversion of ATP and pantetheine 4'-phosphate to diphosphate and 3'-dephospho-coA                                                                                                                                                                                                                                                                                           |
| NGO2086 | 0.0743 | -2.88 | down | 0.2794 | -1.90 | down | 0.0132 | -4.41 | down | hypothetical protein\ Context:(NC_002946)-[2063080-2064387]\ Notes:Best Blastp Hit: emb CAC14203.1  (AJ277636) MapB protein [Pasteurella multocida]                                                                                                                                                                                                                                                                                                                           |

|         |        |       |      |        |        |      |        |      |    |                                                                                                                                                                                                                                                                                                                                                                                                                           |
|---------|--------|-------|------|--------|--------|------|--------|------|----|---------------------------------------------------------------------------------------------------------------------------------------------------------------------------------------------------------------------------------------------------------------------------------------------------------------------------------------------------------------------------------------------------------------------------|
| NGO2088 | 0.0769 | -2.93 | down | 0.2513 | -4.31  | down | 0.2279 | 1.64 | up | putative ABC transporter; ATP-binding protein; enterobactin\ Context:(NC_002946)-[2065061-2065819]\ Notes:Best Blastp Hit: pir   A81962 probable ABC transporter ATP-binding subunit NMA0448 [imported] - Neisseria meningitidis (group A strain Z2491) >gi 7379196 emb CAB83745.1  (AL162753) putative ABC transporter ATP-binding subunit [Neisseria meningitidis] COG1120 ABC-type iron (III) transport system; ATPase |
| NGO2089 | 0.2660 | 2.51  | up   | 0.8829 | 1.09   | up   | 0.3906 | 1.85 | up | hypothetical protein\ Context:(NC_002946)-[2065903-2066529]\ Notes:Best Blastp Hit: pir   G81018 hypothetical protein NMB1992 [imported] - Neisseria meningitidis (group B strain MD58) >gi 7227254 gb AAF42319.1  (AE002548) hypothetical protein [Neisseria meningitidis MC58]                                                                                                                                          |
| NGO2090 | 0.6394 | -1.47 | down | 0.0353 | -11.76 | down | 0.3757 | 2.07 | up | putative ABC transporter; permease protein; enterobactin\ Context:(NC_002946)-[2066574-2067548]\ Notes:Best Blastp Hit: gb AAF42318.1  (AE002548) iron(III) ABC transporter; permease protein [Neisseria meningitidis MC58] COG0609 Iron; hemin; cobalamine permeases                                                                                                                                                     |
| NGO2091 | 0.1190 | -3.31 | down | 0.2533 | -2.59  | down | 0.6541 | 1.36 | up | putative ABC transporter; permease protein; enterobactin\ Context:(NC_002946)-[2067538-2068506]\ Notes:Best Blastp Hit: pir   E81018 iron(III) ABC transporter; permease protein NMB1990 [imported] - Neisseria meningitidis (group B strain MD58) >gi 7227252 gb AAF42317.1  (AE002548) iron(III) ABC transporter; permease protein [Neisseria meningitidis MC58] COG0609 Iron; hemin; cobalamine permeases              |
| NGO2092 | 0.0048 | 7.42  | up   | 0.0348 | 5.19   | up   | 0.0001 | 9.10 | up | ferric enterobactin periplasmic binding protein\ Context:(NC_002946)-[2068734-2069705]\ Notes:Best Blastp Hit: gb AAD29611.1 AF115385_1 (AF115385) putative ferric enterobactin periplasmic binding protein [Neisseria gonorrhoeae] COG0614 Ferrichrome-binding periplasmic proteins                                                                                                                                      |
| NGO2093 | 0.0000 | 47.12 | up   | 0.0048 | 20.11  | up   | 0.0474 | 3.77 | up | FetA\ Context:(NC_002946)-[2069857-2071998]\ Notes:Best Blastp Hit: possibly phase variable - 8T residue homopolymer repeat in the coding sequence (ON) COG1629 Outer membrane receptor proteins; mostly Fe; ferric enterobactin receptor                                                                                                                                                                                 |

|         |        |       |      |        |       |      |        |       |      |                                                                                                                                                                                                                                                                                                                                                                                                                                 |
|---------|--------|-------|------|--------|-------|------|--------|-------|------|---------------------------------------------------------------------------------------------------------------------------------------------------------------------------------------------------------------------------------------------------------------------------------------------------------------------------------------------------------------------------------------------------------------------------------|
| NGO2094 | 0.0710 | 4.26  | up   | 0.0500 | 2.17  | up   | 0.1133 | 3.06  | up   | co-chaperonin GroES\ Context:(NC_002946)+[2072506-2072796]\ Notes:10 kDa chaperonin; Cpn10; GroES; forms homoheptameric ring; binds to one or both ends of the GroEL double barrel in the presence of adenine nucleotides capping it; folding of unfolded substrates initiates in a GroEL-substrate bound and capped by GroES; release of the folded substrate is dependent on ATP binding and hydrolysis in the trans ring     |
| NGO2095 | 0.0831 | 4.36  | up   | 0.0301 | 2.72  | up   | 0.0920 | 3.61  | up   | chaperonin GroEL\ Context:(NC_002946)+[2072888-2074522]\ Notes:60 kDa chaperone family; promotes refolding of misfolded polypeptides especially under stressful conditions; forms two stacked rings of heptamers to form a barrel-shaped 14mer; ends can be capped by GroES                                                                                                                                                     |
| NGO2096 | 0.3838 | -1.49 | down | 0.1970 | -2.02 | down | 0.1205 | -1.62 | down | putative sodium-dependent transporter\ Context:(NC_002946)+[2075176-2076762]\ Notes:Best Blastp Hit: pir     E81964 probable sodium-dependent inner membrane transport protein NMA0470 [imported] - Neisseria meningitidis (group A strain Z2491) >gi 7379216 emb CAB83765.1  (AL162753) putative sodium-dependent inner membrane transport protein [Neisseria meningitidis] COG0733 Sodium-dependent transporters (SNF family) |
| NGO2097 | 0.1056 | 4.14  | up   | 0.6028 | 1.90  | up   | 0.3722 | 2.11  | up   | hypothetical protein\ Context:(NC_002946)-[2076903-2077325]\ Notes:                                                                                                                                                                                                                                                                                                                                                             |
| NGO2098 | 0.0584 | 9.98  | up   | 0.3640 | 3.13  | up   | 0.4126 | 1.56  | up   | hypothetical protein\ Context:(NC_002946)-[2077519-2078739]\ Notes:Best Blastp Hit: pir     D81964 diaminopimelate decarboxylase (EC 4.1.1.20) NMA0468 [imported] - Neisseria meningitidis (group A strain Z2491) >gi 7379215 emb CAB83764.1  (AL162753) diaminopimelate decarboxylase [Neisseria meningitidis] COG0019 Diaminopimelate decarboxylase                                                                           |
| NGO2099 | 0.7209 | -1.20 | down | 0.8037 | -1.11 | down | 0.7845 | 1.10  | up   | hypothetical protein\ Context:(NC_002946)-[2078750-2078920]\ Notes:Best Blastp Hit: emb CAB83763.1  (AL162753) putative lipoprotein [Neisseria meningitidis]                                                                                                                                                                                                                                                                    |

|         |        |        |      |        |        |      |        |       |      |                                                                                                                                                                                                                                                                                                                                                                                             |
|---------|--------|--------|------|--------|--------|------|--------|-------|------|---------------------------------------------------------------------------------------------------------------------------------------------------------------------------------------------------------------------------------------------------------------------------------------------------------------------------------------------------------------------------------------------|
| NGO2100 | 0.0914 | 2.40   | up   | 0.5161 | -1.46  | down | 0.3780 | 1.28  | up   | frataxin-like protein\ Context:(NC_002946)+[2078991-2079314]\ Notes:defects in the mitochondrial frataxin protein cause Friedreich ataxia which is an autosomal recessive neurodegenerative disease; based on phylogenomic distribution this protein may have a role in iron-sulfur cluster protein assembly                                                                                |
| NGO2101 | 0.9502 | 1.03   | up   | 0.5390 | -1.29  | down | 0.4132 | -1.29 | down | hypothetical protein\ Context:(NC_002946)+[2079347-2079766]\ Notes:Best Blastp Hit: gb AAF42308.1  (AE002546) conserved hypothetical protein [Neisseria meningitidis MC58]                                                                                                                                                                                                                  |
| NGO2102 | 0.2492 | -1.77  | down | 0.5234 | -1.36  | down | 0.3042 | -1.96 | down | S-ribosylhomocysteinase\ Context:(NC_002946)+[2079788-2080294]\ Notes:catalyzes the hydrolysis of S-ribosylhomocysteine to homocysteine and autoinducer-2                                                                                                                                                                                                                                   |
| NGO2103 | 0.0143 | 6.41   | up   | 0.0465 | 5.81   | up   | 0.0775 | 2.42  | up   | hypothetical protein\ Context:(NC_002946)+[2080439-2083231]\ Notes:Best Blastp Hit: pir   F81963 DNA-directed DNA polymerase (EC 2.7.7.7) I NMA0462 [imported] - Neisseria meningitidis (group A strain Z2491) >gi 7379209 emb CAB83758.1  (AL162753) DNA polymerase I [Neisseria meningitidis] COG0749 DNA polymerase I - 3'-5' exonuclease and                                            |
| NGO2104 | 0.8554 | 1.09   | up   | 0.5080 | 1.24   | up   | 0.6993 | 1.11  | up   | hypothetical protein\ Context:(NC_002946)+[2083793-2084488]\ Notes:Best Blastp Hit: pir   C81019 hypothetical protein NMB1983 [imported] - Neisseria meningitidis (group B strain MD58; group A strain Z2491) >gi 7227245 gb AAF42311.1  (AE002547) hypothetical protein [Neisseria meningitidis MC58] >gi 7379207 emb CAB83756.1  (AL162753) hypothetical protein [Neisseria meningitidis] |
| NGO2105 | 0.8578 | -1.11  | down | 0.2566 | 1.83   | up   | 0.3714 | 1.76  | up   | adhesion and penetration protein\ Context:(NC_002946)-[2084728-2089134]\ Notes:Best Blastp Hit: pir   D81019 adhesion and penetration protein NMB1985 [imported] - Neisseria meningitidis (group B strain MD58) >gi 7227246 gb AAF42312.1  (AE002547) adhesion and penetration protein [Neisseria meningitidis MC58]                                                                        |
| NGO2106 | 0.0008 | -11.76 | down | 0.0195 | -11.85 | down | 0.3959 | -2.06 | down | hypothetical protein\ Context:(NC_002946)+[2089206-2089541]\ Notes:                                                                                                                                                                                                                                                                                                                         |

|         |        |        |      |        |        |      |        |        |      |                                                                                                                                                                                                                                                                                                                                                                                                                                                                  |
|---------|--------|--------|------|--------|--------|------|--------|--------|------|------------------------------------------------------------------------------------------------------------------------------------------------------------------------------------------------------------------------------------------------------------------------------------------------------------------------------------------------------------------------------------------------------------------------------------------------------------------|
| NGO2107 | 0.1594 | 2.21   | up   | 0.9948 | -1.00  | down | 0.0750 | -1.75  | down | tRNA modification GTPase TrmE\<br>Context:(NC_002946)+[2089572-2090918]\ Notes:in Escherichia coli this protein is involved in the biosynthesis of the hypermodified nucleoside 5-methylaminomethyl-2-thiouridine; which is found in the wobble position of some tRNAs and affects ribosomal frameshifting; shows potassium-dependent dimerization and GTP hydrolysis; also involved in regulation of glutamate-dependent acid resistance and activation of gadE |
| NGO2108 | 0.0102 | -62.56 | down | 0.0075 | -61.02 | down | 0.5976 | -2.77  | down | hypothetical protein\ Context:(NC_002946)-[2090831-2091019]\ Notes:                                                                                                                                                                                                                                                                                                                                                                                              |
| NGO2109 | 0.2644 | -2.69  | down | 0.0588 | -8.58  | down | 0.6587 | 1.20   | up   | hemoglobin-haptoglobin utilization protein B\<br>Context:(NC_002946)-[2091811-2094240]\ Notes:Best Blastp Hit: emb  CAB83769.1   (AL162753) haemoglobin-haptoglobin-utilization protein [Neisseria meningitidis] COG1629 Outer membrane receptor proteins; mostly Fe                                                                                                                                                                                             |
| NGO2111 | 0.0140 | 10.62  | up   | 0.0170 | 6.36   | up   | 0.0034 | 5.17   | up   | hypothetical protein\ Context:(NC_002946)+[2095595-2097208]\ Notes:Best Blastp Hit: pir   B81021 conserved hypothetical protein NMB1971 [imported] - Neisseria meningitidis (group B strain MD58)<br>>gi  7227232  gb  AAF42300.1   (AE002545) conserved hypothetical protein [Neisseria meningitidis MC58]                                                                                                                                                      |
| NGO2112 | 0.0013 | 8.07   | up   | 0.0824 | 2.85   | up   | 0.1523 | 1.73   | up   | putative para-aminobenzoate synthase component\<br>Context:(NC_002946)-[2097269-2099158]\ Notes:Best Blastp Hit: emb  CAB83772.1   (AL162753) putative para-aminobenzoate synthase component I [Neisseria meningitidis] COG0147 Anthranilate/para-aminobenzoate synthases                                                                                                                                                                                        |
| NGO2113 | 0.0079 | -9.83  | down | 0.0001 | -51.17 | down | 0.0006 | -29.58 | down | hypothetical protein\ Context:(NC_002946)+[2099285-2100214]\ Notes:Best Blastp Hit: gb  AAG03531.1  AE004452_3 (AE004452) conserved hypothetical protein [Pseudomonas aeruginosa]                                                                                                                                                                                                                                                                                |
| NGO2116 | 0.5570 | 1.44   | up   | 0.3278 | 1.38   | up   | 0.7363 | -1.10  | down | putative ABC transporter; ATP-binding protein\<br>Context:(NC_002946)+[2102863-2103723]\ Notes:Best Blastp Hit: emb  CAB83778.1   (AL162753) putative ABC transport ATP-binding protein [Neisseria meningitidis] COG1127 Uncharacterized ABC-type transport system                                                                                                                                                                                               |

|         |        |       |      |        |       |      |        |       |      |                                                                                                                                                                                                                                                                                                                                                                                                       |
|---------|--------|-------|------|--------|-------|------|--------|-------|------|-------------------------------------------------------------------------------------------------------------------------------------------------------------------------------------------------------------------------------------------------------------------------------------------------------------------------------------------------------------------------------------------------------|
| NGO2117 | 0.9325 | 1.06  | up   | 0.3669 | -1.36 | down | 0.2712 | -1.47 | down | ABC transporter inner membrane protein\<br>Context:(NC_002946)+[2103771-2104547]\ Notes:Best Blastp Hit: pir   F81022 probable ABC transport inner membrane subunit NMA0486 [imported] - Neisseria meningitidis (group B strain MD58; group A strain Z2491) >gi 7227225 gb AAF42294.1  (AE002544) conserved hypothetical protein [Neisseria meningitidis MC58] >gi 7379230 emb CAB83779.1  (AL162753) |
| NGO2118 | 0.4215 | 1.49  | up   | 0.8643 | -1.07 | down | 0.4624 | -1.21 | down | hypothetical protein\<br>Context:(NC_002946)+[2104529-2105092]\ Notes:Best Blastp Hit: pir   E81022 probable outer membrane transport protein NMA0487 [imported] - Neisseria meningitidis (group B strain MD58; group A strain Z2491) >gi 7227224 gb AAF42293.1  (AE002544) conserved hypothetical protein [Neisseria meningitidis MC58] >gi 7379231 emb CAB83780.1  (AL162753)                       |
| NGO2119 | 0.9462 | -1.03 | down | 0.4434 | 1.33  | up   | 0.1795 | -1.56 | down | hypothetical protein\<br>Context:(NC_002946)+[2105123-2105713]\ Notes:Best Blastp Hit: gb AAF42292.1  (AE002544) conserved hypothetical protein [Neisseria meningitidis MC58]                                                                                                                                                                                                                         |
| NGO2120 | 0.8943 | -1.06 | down | 0.4929 | 1.24  | up   | 0.4950 | -1.30 | down | hypothetical protein\<br>Context:(NC_002946)+[2105764-2106042]\ Notes:Best Blastp Hit: pir   C81022 hypothetical protein NMB1962 [imported] - Neisseria meningitidis (group B strain MD58) >gi 7227222 gb AAF42291.1  (AE002544) hypothetical protein [Neisseria meningitidis MC58]                                                                                                                   |
| NGO2121 | 0.7323 | -1.17 | down | 0.2150 | -1.68 | down | 0.1302 | -1.69 | down | hypothetical protein\<br>Context:(NC_002946)+[2106039-2106872]\ Notes:Best Blastp Hit: gb AAF42290.1  (AE002544) VacJ-related protein [Neisseria meningitidis MC58]                                                                                                                                                                                                                                   |
| NGO2122 | 0.3687 | 1.66  | up   | 0.7507 | 1.11  | up   | 0.4397 | 1.26  | up   | hypothetical protein\<br>Context:(NC_002946)+[2106877-2107359]\ Notes:Best Blastp Hit: pir   A81022 hypothetical protein NMB1960 [imported] - Neisseria meningitidis (group B strain MD58; group A strain Z2491) >gi 7227220 gb AAF42289.1  (AE002544) hypothetical protein [Neisseria meningitidis MC58] >gi 7379235 emb CAB83784.1  (AL162753) hypothetical protein [Neisseria meningitidis]        |

|         |        |       |      |        |        |      |        |       |      |                                                                                                                                                                                                                                                                                                                                                                                             |
|---------|--------|-------|------|--------|--------|------|--------|-------|------|---------------------------------------------------------------------------------------------------------------------------------------------------------------------------------------------------------------------------------------------------------------------------------------------------------------------------------------------------------------------------------------------|
| NGO2123 | 0.8856 | 1.06  | up   | 0.7622 | 1.12   | up   | 0.2390 | -1.62 | down | hypothetical protein\ Context:(NC_002946)+[2107359-2107742]\ Notes:Best Blastp Hit: gb AAF42288.1  (AE002544) conserved hypothetical protein [Neisseria meningitidis MC58] >gi 7379236 emb CAB83785.1  (AL162753) conserved hypothetical protein [Neisseria meningitidis] COG0824 Predicted esterase                                                                                        |
| NGO2124 | 0.1155 | -2.31 | down | 0.3748 | -2.64  | down | 0.6192 | -1.67 | down | putative thioredoxin\ Context:(NC_002946)+[2107739-2108227]\ Notes:Best Blastp Hit: emb CAB83786.1  (AL162753) putative periplasmic protein [Neisseria meningitidis] COG0526 Thiol-disulfide isomerase and thioredoxins                                                                                                                                                                     |
| NGO2125 | 0.0173 | -8.58 | down | 0.0055 | -10.98 | down | 0.1744 | -3.08 | down | putative acetyltransferase\ Context:(NC_002946)-[2108308-2108826]\ Notes:Best Blastp Hit: emb CAB83787.1  (AL162753) putative acetyltransferase [Neisseria meningitidis] COG2171 Tetrahydrodipicolinate                                                                                                                                                                                     |
| NGO2126 | 0.0060 | 20.33 | up   | 0.0092 | 11.59  | up   | 0.0377 | 7.69  | up   | 50S ribosomal protein L31\ Context:(NC_002946)+[2108958-2109173]\ Notes:RpmE; there appears to be two types of ribosomal proteins L31 in bacterial genomes; some contain a CxxC motif while others do not; Bacillus subtilis has both types; the proteins in this cluster have the CXXC motif; RpmE is found in exponentially growing Bacilli while YtiA was found after exponential growth |
| NGO2127 | 0.6356 | 1.27  | up   | 0.9954 | 1.00   | up   | 0.3571 | -1.67 | down | CadD\ Context:(NC_002946)+[2109425-2110066]\ Notes:Best Blastp Hit: possibly phase variable - 9A residue homopolymer repeat in the coding sequence (ON); putative cadmium resistance protein                                                                                                                                                                                                |
| NGO2128 | 0.1054 | 2.31  | up   | 0.2234 | -2.63  | down | 0.2635 | 1.34  | up   | hypothetical protein\ Context:(NC_002946)+[2110212-2111888]\ Notes:Best Blastp Hit: pir F81967 probable inner membrane protein NMA0497 [imported] - Neisseria meningitidis (group A strain Z2491) >gi 7379241 emb CAB83790.1  (AL162753) putative inner membrane protein [Neisseria meningitidis]                                                                                           |
| NGO2130 | 0.7839 | 1.16  | up   | 0.6391 | -1.22  | down | 0.9030 | -1.05 | down | RegF\ Context:(NC_002946)+[2112095-2112700]\ Notes:Best Blastp Hit: emb CAA68006.1  (X99693) regF [Neisseria gonorrhoeae] COG0625 Glutathione-S-transferases; putative regulator of pilE expression                                                                                                                                                                                         |

|         |        |       |      |        |       |      |        |       |      |                                                                                                                                                                                                                                                                                                                                                                                        |
|---------|--------|-------|------|--------|-------|------|--------|-------|------|----------------------------------------------------------------------------------------------------------------------------------------------------------------------------------------------------------------------------------------------------------------------------------------------------------------------------------------------------------------------------------------|
| NGO2131 | 0.1190 | 2.27  | up   | 0.1336 | 3.92  | up   | 0.1982 | 2.81  | up   | ClpXP protease specificity-enhancing factor\<br>Context:(NC_002946)+[2112772-2113164]\ Notes:Best Blastp Hit: gb AAF42281.1  (AE002543) stringent starvation protein B [Neisseria meningitidis MC58]                                                                                                                                                                                   |
| NGO2132 | 0.5520 | 1.49  | up   | 0.6700 | -1.81 | down | 0.6052 | 1.85  | up   | hypothetical protein\<br>Context:(NC_002946)+[2113212-2113397]\ Notes:                                                                                                                                                                                                                                                                                                                 |
| NGO2133 | 0.3602 | 1.59  | up   | 0.4870 | -1.33 | down | 0.9701 | -1.01 | down | hypothetical protein\<br>Context:(NC_002946)-[2113363-2113905]\ Notes:Best Blastp Hit: gb AAF42280.1  (AE002543) conserved hypothetical protein [Neisseria meningitidis MC58] COG1610 Uncharacterized protein; YqeY family                                                                                                                                                             |
| NGO2134 | 0.1684 | 2.40  | up   | 0.7730 | 1.12  | up   | 0.4300 | 1.36  | up   | 30S ribosomal protein S21\<br>Context:(NC_002946)-[2113941-2114153]\ Notes:a small basic protein that is one of the last in the subunit assembly; omission does not prevent assembly but the subunit is inactive; binds central domain of 16S rRNA                                                                                                                                     |
| NGO2135 | 0.6645 | 1.20  | up   | 0.8826 | 1.06  | up   | 0.2577 | 1.77  | up   | putative transglycosylase\<br>Context:(NC_002946)-[2114442-2116292]\ Notes:Best Blastp Hit: emb CAB83796.1  (AL162753) putative transglycosylase [Neisseria meningitidis] COG0741 Soluble lytic murein transglycosylase and                                                                                                                                                            |
| NGO2136 | 0.5848 | -1.39 | down | 0.0169 | -8.68 | down | 0.5253 | -1.89 | down | hypothetical protein\<br>Context:(NC_002946)+[2116331-2116516]\ Notes:                                                                                                                                                                                                                                                                                                                 |
| NGO2137 | 0.2922 | -1.73 | down | 0.4716 | -1.34 | down | 0.4304 | -1.49 | down | putative ABC transporter; ATP-binding protein\<br>Context:(NC_002946)+[2116669-2117406]\ Notes:Best Blastp Hit: emb CAB83797.1  (AL162753) putative ABC transport ATP-binding subunit [Neisseria meningitidis] COG1135 Uncharacterized ABC-type transport system                                                                                                                       |
| NGO2138 | 0.0472 | -3.37 | down | 0.0107 | -5.67 | down | 0.4488 | -1.38 | down | putative ABC transporter; permease protein\<br>Context:(NC_002946)+[2117408-2118094]\ Notes:Best Blastp Hit: pir D81023 ABC transporter; permease protein NMB1947 [imported] - Neisseria meningitidis (group B strain MD58) >gi 7227206 gb AAF42276.1  (AE002543) ABC transporter; permease protein [Neisseria meningitidis MC58] COG2011 Permease component of an uncharacterized ABC |



|         |        |       |      |        |       |      |        |       |      |                                                                                                                                                                                                                                                                                                                                                                                     |
|---------|--------|-------|------|--------|-------|------|--------|-------|------|-------------------------------------------------------------------------------------------------------------------------------------------------------------------------------------------------------------------------------------------------------------------------------------------------------------------------------------------------------------------------------------|
| NGO2139 | 0.4147 | 1.64  | up   | 0.6806 | 1.16  | up   | 0.5667 | 1.31  | up   | hypothetical protein\ Context:(NC_002946)+[2118253-2119119]\ Notes:Best Blastp Hit: gb AAF44768.1 AF235151_1 (AF235151) GNA1946 [Neisseria gonorrhoeae] >gi 7274428 gb AAF44769.1 AF235152_1 (AF235152) GNA1946 [Neisseria gonorrhoeae] >gi 7274430 gb AAF44770.1 AF235153_1 (AF235153) GNA1946                                                                                     |
| NGO2140 | 0.0303 | -4.04 | down | 0.0937 | -5.95 | down | 0.1735 | -2.15 | down | aromatic acid decarboxylase\ Context:(NC_002946)-[2119182-2119754]\ Notes:catalyzes the formation of 2-octaprenylphenol from 3-octaprenyl-4-hydroxybenzoate                                                                                                                                                                                                                         |
| NGO2141 | 0.6879 | 1.21  | up   | 0.6508 | -1.22 | down | 0.8068 | 1.07  | up   | putative chromosome segregation protein\ Context:(NC_002946)+[2119909-2120769]\ Notes:Best Blastp Hit: pir A81969 probable chromosome segregation proteins NMA0508 [imported] - Neisseria meningitidis (group A strain Z2491) >gi 7379252 emb CAB83801.1  (AL162753) putative chromosome segregation proteins [Neisseria meningitidis] COG1475 Predicted transcriptional regulators |
| NGO2142 | 0.0609 | -5.46 | down | 0.0581 | -9.25 | down | 0.5908 | 1.36  | up   | hypothetical protein\ Context:(NC_002946)-[2120817-2121239]\ Notes:Best Blastp Hit: sp P44726 YICC_HAEIN hypothetical protein HI0467 >gi 1074414 pir C64153 hypothetical protein HI0467 - Haemophilus influenzae (strain Rd KW20) >gi 1573445 gb AAC22126.1  (U32729) conserved hypothetical protein [Haemophilus influenzae Rd]                                                    |
| NGO2143 | 0.7255 | 1.22  | up   | 0.6712 | 1.33  | up   | 0.7138 | -1.19 | down | AtpI\ Context:(NC_002946)+[2121443-2121796]\ Notes:Best Blastp Hit: pir F81025 hypothetical protein NMB1941 [imported] - Neisseria meningitidis (group B strain MD58) >gi 7227199 gb AAF42270.1  (AE002542) hypothetical protein [Neisseria meningitidis MC58]; putative ATP synthase I                                                                                             |
| NGO2144 | 0.7308 | 1.19  | up   | 0.9427 | 1.03  | up   | 0.6505 | -1.12 | down | FOF1 ATP synthase subunit A\ Context:(NC_002946)+[2121786-2122652]\ Notes:Produces ATP from ADP in the presence of a proton gradient across the membrane. Subunit A is part of the membrane proton channel FO                                                                                                                                                                       |

|         |        |      |    |        |      |    |        |      |    |                                                                                                                                                                                                                                                                         |
|---------|--------|------|----|--------|------|----|--------|------|----|-------------------------------------------------------------------------------------------------------------------------------------------------------------------------------------------------------------------------------------------------------------------------|
| NGO2145 | 0.1596 | 2.58 | up | 0.1327 | 1.69 | up | 0.2175 | 1.86 | up | FOF1 ATP synthase subunit C\<br>Context:(NC_002946)+[2122709-2122945]\ Notes:Produces ATP from ADP in the presence of a proton gradient across the membrane. Subunit C is part of the membrane proton channel FO                                                        |
| NGO2146 | 0.1773 | 2.27 | up | 0.1907 | 1.57 | up | 0.3654 | 1.46 | up | FOF1 ATP synthase subunit B\<br>Context:(NC_002946)+[2123015-2123485]\ Notes:Produces ATP from ADP in the presence of a proton gradient across the membrane. Subunit B is part of the membrane proton channel.                                                          |
| NGO2147 | 0.1483 | 2.49 | up | 0.1277 | 1.68 | up | 0.3114 | 1.50 | up | FOF1 ATP synthase subunit delta\<br>Context:(NC_002946)+[2123490-2124023]\ Notes:produces ATP from ADP in the presence of a proton gradient across the membrane; the delta subunit is part of the catalytic core of the ATP synthase complex                            |
| NGO2148 | 0.1203 | 2.54 | up | 0.1691 | 1.58 | up | 0.2271 | 1.58 | up | FOF1 ATP synthase subunit alpha\<br>Context:(NC_002946)+[2124034-2125581]\ Notes:produces ATP from ADP in the presence of a proton gradient across the membrane; the alpha chain is a catalytic subunit                                                                 |
| NGO2149 | 0.1391 | 2.44 | up | 0.1249 | 1.71 | up | 0.2477 | 1.59 | up | FOF1 ATP synthase subunit gamma\<br>Context:(NC_002946)+[2125606-2126481]\ Notes:Produces ATP from ADP in the presence of a proton gradient across the membrane. The gamma chain is a regulatory subunit                                                                |
| NGO2150 | 0.1765 | 2.19 | up | 0.0962 | 1.78 | up | 0.2762 | 1.60 | up | FOF1 ATP synthase subunit beta\<br>Context:(NC_002946)+[2126519-2127916]\ Notes:Produces ATP from ADP in the presence of a proton gradient across the membrane. The beta chain is a regulatory subunit                                                                  |
| NGO2151 | 0.3142 | 1.89 | up | 0.2440 | 1.47 | up | 0.2095 | 1.74 | up | FOF1 ATP synthase subunit epsilon\<br>Context:(NC_002946)+[2127927-2128349]\ Notes:part of catalytic core of ATP synthase; alpha(3)beta(3)gamma(1)delta(1)epsilon(1); involved in producing ATP from ADP in the presence of the proton motive force across the membrane |

|         |        |      |    |        |       |      |        |       |      |                                                                                                                                                                                                                                                                                                                                                                                                          |
|---------|--------|------|----|--------|-------|------|--------|-------|------|----------------------------------------------------------------------------------------------------------------------------------------------------------------------------------------------------------------------------------------------------------------------------------------------------------------------------------------------------------------------------------------------------------|
| NGO2153 | 0.2955 | 1.76 | up | 0.7222 | -1.18 | down | 0.8554 | 1.07  | up   | glycyl-tRNA synthetase subunit alpha\<br>Context:(NC_002946)+[2128521-2129417]\ Notes:glycine--<br>tRNA ligase alpha chain; GlyRS; class II aminoacyl tRNA<br>synthetase; tetramer of alpha(2)beta(2); catalyzes a two-<br>step reaction; first charging a glycine molecule by linking its<br>carboxyl group to the alpha-phosphate of ATP; second by<br>transfer of the aminoacyl-adenylate to its tRNA |
| NGO2154 | 0.0075 | 5.33 | up | 0.0455 | 3.10  | up   | 0.1089 | 1.74  | up   | glycyl-tRNA synthetase subunit beta\<br>Context:(NC_002946)+[2129534-2131597]\ Notes:glycine--<br>tRNA ligase beta chain; glyS; class II aminoacyl tRNA<br>synthetase; tetramer of alpha(2)beta(2); catalyzes a two-<br>step reaction; first charging a glycine molecule by linking<br>the carboxyl group to the alpha-phosphate of ATP; second<br>by transfer of the aminoacyl-adenylate to its tRNA    |
| NGO2156 | 0.4264 | 1.47 | up | 0.9458 | 1.03  | up   | 0.9185 | -1.03 | down | LgtB\<br>Context:(NC_002946)+[2132700-2133539]\<br>Notes:Best Blastp Hit: sp Q50947 LGTB_NEIGO lacto-N-<br>neotetraose biosynthesis glycosyl transferase LgtB<br>>gi 595811 gb AAA68010.1  (U14554) glycosyl transferase<br>[Neisseria gonorrhoeae]; lacto-N-neotetraose biosynthesis<br>glycosyl tranferase                                                                                             |
| NGO2158 | 0.2245 | 1.97 | up | 0.3901 | 1.31  | up   | 0.5226 | 1.18  | up   | LgtD\<br>Context:(NC_002946)+[2134535-2135551]\<br>Notes:Best Blastp Hit: gb AAA68012.1  (U14554) glycosyl<br>transferase [Neisseria gonorrhoeae] COG0463<br>Glycosyltransferases involved in cell wall                                                                                                                                                                                                  |
| NGO2159 | 0.4236 | 1.45 | up | 0.9803 | 1.01  | up   | 0.5702 | -1.15 | down | LgtE\<br>Context:(NC_002946)+[2135570-2136412]\<br>Notes:Best Blastp Hit: sp Q50950 LGTE_NEIGO lacto-N-<br>neotetraose biosynthesis glycosyl transferase LgtE<br>>gi 595814 gb AAA68013.1  (U14554) glycosyl transferase<br>[Neisseria gonorrhoeae]                                                                                                                                                      |
| NGO2160 | 0.1871 | 3.36 | up | 0.8654 | -1.23 | down | 0.3364 | 2.40  | up   | hypothetical protein\<br>Context:(NC_002946)-[2136608-<br>2137333]\ Notes:Best Blastp Hit: pir H81026 conserved<br>hypothetical protein NMB1925 [imported] - Neisseria<br>meningitidis (group B strain MD58)<br>>gi 7227182 gb AAF42254.1  (AE002541) conserved<br>hypothetical protein [Neisseria meningitidis MC58]<br>COG1385 Uncharacterized BCR                                                     |

|         |        |       |      |        |       |      |        |       |      |                                                                                                                                                                                                                                                                                                                                                                                                           |
|---------|--------|-------|------|--------|-------|------|--------|-------|------|-----------------------------------------------------------------------------------------------------------------------------------------------------------------------------------------------------------------------------------------------------------------------------------------------------------------------------------------------------------------------------------------------------------|
| NGO2161 | 0.5206 | 1.35  | up   | 0.6160 | -1.22 | down | 0.8163 | -1.06 | down | hypothetical protein\ Context:(NC_002946)+[2137437-2138231]\ Notes:Best Blastp Hit: emb CAB83821.1  (AL162753) hypothetical protein NMA0529 [Neisseria meningitidis] COG0483 Inositol phosphatase family proteins                                                                                                                                                                                         |
| NGO2162 | 0.6383 | 1.46  | up   | 0.0090 | -9.00 | down | 0.5295 | -1.60 | down | hypothetical protein\ Context:(NC_002946)-[2138449-2138934]\ Notes:Best Blastp Hit: gb AAF42252.1  (AE002541) conserved hypothetical protein [Neisseria meningitidis MC58]                                                                                                                                                                                                                                |
| NGO2163 | 0.1230 | 2.61  | up   | 0.1437 | 1.65  | up   | 0.3071 | 1.64  | up   | 3-ketoacyl-(acyl-carrier-protein) reductase\ Context:(NC_002946)-[2138999-2139745]\ Notes:catalyzes the first of the two reduction steps in the elongation cycle of fatty acid synthesis                                                                                                                                                                                                                  |
| NGO2164 | 0.5201 | 1.41  | up   | 0.5137 | 1.24  | up   | 0.7605 | 1.12  | up   | bifunctional GMP synthase/glutamine amidotransferase protein\ Context:(NC_002946)-[2139807-2141372]\ Notes:contains glutamine-hydrolyzing domain and glutamine amidotransferase; GMP-binding domain; functions to produce GMP from XMP in the IMP pathway                                                                                                                                                 |
| NGO2165 | 0.0777 | -3.36 | down | 0.7417 | -1.46 | down | 0.6941 | 1.34  | up   | putative ABC transporter; ATP-binding protein\ Context:(NC_002946)-[2141472-2143340]\ Notes:Best Blastp Hit: gb AAF42249.1  (AE002541) ABC transporter; ATP-binding protein [Neisseria meningitidis MC58] COG1132 ABC-type multidrug/protein/lipid transport                                                                                                                                              |
| NGO2166 | 0.3450 | 1.61  | up   | 0.4786 | 1.28  | up   | 0.5728 | 1.20  | up   | acyl-carrier-protein S-malonyltransferase\ Context:(NC_002946)-[2143479-2144405]\ Notes:Best Blastp Hit: pir B81026 malonyl CoA-acyl carrier protein transacylase NMB1918 [imported] - Neisseria meningitidis (group B strain MD58) >gi 7227176 gb AAF42248.1  (AE002541) malonyl CoA-acyl carrier protein transacylase [Neisseria meningitidis MC58] COG0331 (acyl-carrier-protein) S-malonyltransferase |
| NGO2167 | 0.4605 | -1.55 | down | 0.8081 | 1.10  | up   | 0.7638 | -1.10 | down | hypothetical protein\ Context:(NC_002946)-[2144431-2144802]\ Notes:Best Blastp Hit: emb CAB83831.1  (AL162753) putative integral membrane protein [Neisseria meningitidis]                                                                                                                                                                                                                                |

|         |        |       |      |        |       |      |        |       |      |                                                                                                                                                                                                                                                                                                                                                                                                                 |
|---------|--------|-------|------|--------|-------|------|--------|-------|------|-----------------------------------------------------------------------------------------------------------------------------------------------------------------------------------------------------------------------------------------------------------------------------------------------------------------------------------------------------------------------------------------------------------------|
| NGO2168 | 0.6406 | 1.24  | up   | 0.3249 | -1.81 | down | 0.7308 | -1.11 | down | 3-oxoacyl-(acyl carrier protein) synthase III\<br>Context:(NC_002946)-[2144849-2145811]\ Notes:FabH;<br>beta-ketoacyl-acyl carrier protein synthase III; catalyzes the<br>condensation of acetyl-CoA with malonyl-ACP to initiate<br>cycles of fatty acid elongation; differs from 3-oxoacyl-(acyl<br>carrier protein) synthase I and II in that it utilizes CoA<br>thioesters as primers rather than acyl-ACPs |
| NGO2170 | 0.1622 | 3.66  | up   | 0.4779 | 1.86  | up   | 0.3870 | 2.10  | up   | hypothetical protein\<br>Context:(NC_002946)-[2146659-<br>2146910]\ Notes:Best Blastp Hit: gb AAF42244.1 <br>(AE002540) hypothetical protein [Neisseria meningitidis<br>MC58] >gi 7379280 emb CAB83834.1  (AL162753)<br>hypothetical protein NMA0541 [Neisseria meningitidis]                                                                                                                                   |
| NGO2171 | 0.0612 | 3.09  | up   | 0.4363 | 1.81  | up   | 0.0972 | 1.67  | up   | putative glycerol-3-phosphate acyltransferase PlsX\<br>Context:(NC_002946)-[2147048-2148094]\ Notes:involved<br>in acylation of glycerol-3-phosphate to form 1-acyl-glycerol-<br>3 phosphate for use in phospholipid biosynthesis; functions<br>with PlsY                                                                                                                                                       |
| NGO2172 | 0.2510 | 1.86  | up   | 0.1124 | 1.82  | up   | 0.3249 | 1.36  | up   | hypothetical protein\<br>Context:(NC_002946)-[2148184-<br>2148711]\ Notes:Best Blastp Hit: pir   G81028 conserved<br>hypothetical protein NMB1912 [imported] - Neisseria<br>meningitidis (group B strain MD58)<br>>gi 7227169 gb AAF42242.1  (AE002540) conserved<br>hypothetical protein [Neisseria meningitidis MC58]<br>COG2236 Predicted phosphoribosyltransferases                                         |
| NGO2173 | 0.0175 | 13.51 | up   | 0.0694 | 4.93  | up   | 0.9264 | 1.03  | up   | 50S ribosomal protein L32\<br>Context:(NC_002946)-[2148886-<br>2149065]\ Notes:some L32 proteins have zinc finger motifs<br>consisting of CXXC while others do not                                                                                                                                                                                                                                              |
| NGO2174 | 0.0642 | 3.09  | up   | 0.2871 | 1.55  | up   | 0.4991 | 1.25  | up   | hypothetical protein\<br>Context:(NC_002946)-[2149099-<br>2149599]\ Notes:Best Blastp Hit: pir   A81973 hypothetical<br>protein NMA0545 [imported] - Neisseria meningitidis<br>(group A strain Z2491) >gi 7379284 emb CAB83838.1 <br>(AL162753) hypothetical protein NMA0545 [Neisseria<br>meningitidis]                                                                                                        |
| NGO2175 | 0.0875 | -2.75 | down | 0.2770 | -1.55 | down | 0.0372 | -3.05 | down | Maf-like protein\<br>Context:(NC_002946)+[2149747-<br>2150337]\ Notes:Maf; overexpression in Bacillus subtilis<br>inhibits septation in the dividing cell                                                                                                                                                                                                                                                       |

|         |        |        |      |        |        |      |        |       |      |                                                                                                                                                                                                                                                                                                                                     |
|---------|--------|--------|------|--------|--------|------|--------|-------|------|-------------------------------------------------------------------------------------------------------------------------------------------------------------------------------------------------------------------------------------------------------------------------------------------------------------------------------------|
| NGO2176 | 0.5967 | -1.85  | down | 0.0060 | -41.18 | down | 0.7378 | -1.43 | down | hypothetical protein\ Context:(NC_002946)-[2150090-2151172]\ Notes:Best Blastp Hit: sp P45610 TONB_KLEPN TonB protein >gi 484474 pir JN0788 tonB protein - Klebsiella pneumoniae >gi 405758 emb CAA48498.1  (X68478) TonB [Klebsiella pneumoniae]                                                                                   |
| NGO2177 | 0.1006 | -2.37  | down | 0.1441 | -2.37  | down | 0.0027 | -3.41 | down | hypothetical protein\ Context:(NC_002946)+[2150384-2151109]\ Notes:Best Blastp Hit: gb AAF42238.1  (AE002540) conserved hypothetical protein [Neisseria meningitidis MC58] COG0313 Predicted methyltransferases                                                                                                                     |
| NGO2178 | 0.1964 | 1.98   | up   | 0.0753 | 2.46   | up   | 0.4033 | 1.32  | up   | putative inner membrane protein translocase component YidC\ Context:(NC_002946)-[2151190-2152827]\ Notes:functions to insert inner membrane proteins into the IM in Escherichia coli; interacts with transmembrane segments; functions in both Sec-dependent and - independent membrane insertion; similar to Oxa1p in mitochondria |
| NGO2179 | 0.0007 | -20.69 | down | 0.0052 | -28.75 | down | 0.0915 | -3.68 | down | hypothetical protein\ Context:(NC_002946)+[2152852-2152986]\ Notes:                                                                                                                                                                                                                                                                 |
| NGO2180 | 0.4335 | -2.28  | down | 0.2393 | -2.19  | down | 0.1013 | -3.55 | down | hypothetical protein\ Context:(NC_002946)-[2153000-2153221]\ Notes:Best Blastp Hit: pir E81973 hypothetical protein NMA0549 [imported] - Neisseria meningitidis (group A strain Z2491) >gi 7379288 emb CAB83842.1  (AL162753) hypothetical protein NMA0549 [Neisseria meningitidis] COG0759 Uncharacterized ACR; YidD family        |
| NGO2181 | 0.4656 | -1.45  | down | 0.9271 | -1.05  | down | 0.2728 | -1.86 | down | ribonuclease P\ Context:(NC_002946)-[2153286-2153651]\ Notes:protein component of RNaseP which catalyzes the removal of the 5'-leader sequence from pre-tRNA to produce the mature 5'terminus; this enzyme also cleaves other RNA substrates                                                                                        |
| NGO2182 | 0.3157 | 2.01   | up   | 0.5446 | 1.33   | up   | 0.5132 | 1.26  | up   | 50S ribosomal protein L34\ Context:(NC_002946)-[2153654-2153788]\ Notes:in Escherichia coli transcription of this gene is enhanced by polyamines                                                                                                                                                                                    |
| NGO6151 | 0.5080 | 2.12   | up   | 0.7058 | -1.52  | down | 0.4136 | -2.45 | down | hypothetical protein\ Context:(NC_002946)+[604158-604448]\ Notes:                                                                                                                                                                                                                                                                   |

Table S3\_ *nrrF* mutant strain\_array fold changes\_3hr

| Locus Tag | p value | <i>nrrF</i> mutant Fe-/Fe+ Fold Change | Regulation | Probe Comment                                                                                                                                                                                                                                                                                                                     | Biological Category                            |
|-----------|---------|----------------------------------------|------------|-----------------------------------------------------------------------------------------------------------------------------------------------------------------------------------------------------------------------------------------------------------------------------------------------------------------------------------|------------------------------------------------|
| NGO0106   | 0.0009  | 6.43                                   | up         | S-adenosylmethionine synthetase\ Context:(NC_002946)+[118517-119686]\ Notes:methionine adenosyltransferase; catalyzes the formation of S-adenosylmethionine from methionine and ATP; methionine adenosyltransferase                                                                                                               | Amino Acid Biosynthesis and Metabolism         |
| NGO0873   | 0.0310  | 25.53                                  | up         | DNA modification methylase M.NGOI\ Context:(NC_002946)+[857066-858004]\ Notes:Best Blastp Hit: emb CAB44950.1  (AJ242840) DNA modification methylase [Neisseria gonorrhoeae] >gi 5262959 emb CAB45015.2  (AJ242839) DNA modification methylase [Neisseria gonorrhoeae] COG0270 Site-specific DNA methylase dcm; DcmD              | Amino Acid Biosynthesis and Metabolism         |
| NGO1217   | 0.0218  | 2.46                                   | up         | glutathione synthetase\ Context:(NC_002946)-[1166816-1167775]\ Notes:The second step in the glutathione biosynthesis pathway; where it synthesizes ATP + gamma-L-glutamyl-L-cysteine + glycine = ADP + phosphate + glutathione                                                                                                    | Amino Acid Biosynthesis and Metabolism         |
| NGO1240   | 0.0243  | 2.51                                   | up         | histidinol dehydrogenase\ Context:(NC_002946)+[1191348-1192637]\ Notes:catalyzes the oxidation of L-histidinol to L-histidinaldehyde and then to L-histidine in histidine biosynthesis; functions as a dimer                                                                                                                      | Amino Acid Biosynthesis and Metabolism         |
| NGO1241   | 0.0393  | 4.15                                   | up         | histidinol-phosphate aminotransferase\ Context:(NC_002946)+[1192683-1193762]\ Notes:catalyzes the formation of L-histidinol phosphate from imidazole-acetol phosphate and glutamate in histidine biosynthesis                                                                                                                     | Amino Acid Biosynthesis and Metabolism         |
| NGO1487   | 0.0149  | 2.91                                   | up         | arginine decarboxylase\ Context:(NC_002946)-[1450398-1452290]\ Notes:catalyzes the formation of agmatine from arginine in putrescine and spermidine biosynthesis                                                                                                                                                                  | Amino Acid Biosynthesis and Metabolism         |
| NGO1535   | 0.0429  | 3.11                                   | up         | UDP-N-acetylmuramoyl-L-alanyl-D-glutamatesynthetase\ Context:(NC_002946)-[1507328-1508665]\ Notes:UDP-N-acetylmuramoylalanine--D-glutamate ligase; involved in peptidoglycan biosynthesis; cytoplasmic; catalyzes the addition of glutamate to the nucleotide precursor UDP-N-acetylmuramoyl-L-alanine during cell wall formation | Amino Acid Biosynthesis and Metabolism         |
| NGO1539   | 0.0152  | 2.63                                   | up         | putative UDP-MurNac-pentapeptide synthetase\ Context:(NC_002946)-[1510761-1512119]\ Notes:Best Blastp Hit: emb CAB85286.1  (AL162758) UDP-MurNac-pentapeptide synthetase [Neisseria meningitidis] COG0770 UDP-N-acetylmuramyl pentapeptide synthase                                                                               | Amino Acid Biosynthesis and Metabolism         |
| NGO1541   | 0.0175  | 7.26                                   | up         | UDP-N-acetylmuramoylalanyl-D-glutamate--2; 6-diaminopimelate ligase\ Context:(NC_002946)-[1513913-1515391]\ Notes:involved in cell wall formation; peptidoglycan synthesis; cytoplasmic enzyme; catalyzes the addition of meso-diaminopimelic acid to the nucleotide precursor UDP-N-aceylmuramoyl-l-alanyl-d-glutamate           | Amino Acid Biosynthesis and Metabolism         |
| NGO1781   | 0.0451  | 2.21                                   | up         | dihydrodipicolinate reductase\ Context:(NC_002946)+[1749964-1750773]\ Notes:catalyzes the reduction of 2;3-dihydrodipicolinate to 2;3;4;5-tetrahydrodipicolinate in lysine and diaminopimelate biosynthesis                                                                                                                       | Amino Acid Biosynthesis and Metabolism         |
| NGO0803   | 0.0283  | 2.50                                   | up         | putative GTP-binding protein\ Context:(NC_002946)-[793931-795742]\ Notes:Best Blastp Hit: pir H81111 GTP-binding protein TypA NMB1199 [imported] - Neisseria meningitidis (group B strain MD58) >gi 7226435 gb AAF41581.1  (AE002467) GTP-binding protein TypA [Neisseria meningitidis MC58] COG1217 Membrane GTPase              | Cell Communication and Outer Membrane Proteins |
| NGO1688   | 0.0098  | 10.32                                  | up         | putative outer membrane protein OmpU\ Context:(NC_002946)-[1641216-1642685]\ Notes:Best Blastp Hit: emb CAB85386.1  (AL162758) conserved hypothetical protein [Neisseria meningitidis]                                                                                                                                            | Cell Communication and Outer Membrane Proteins |
| NGO1802   | 0.0233  | 2.59                                   | up         | hypothetical protein\ Context:(NC_002946)+[1776008-1776565]\ Notes:Best Blastp Hit: gb AAF40638.1  (AE002375) outer membrane protein OmpH; putative [Neisseria meningitidis MC58]                                                                                                                                                 | Cell Communication and Outer Membrane Proteins |

|         |        |       |    |                                                                                                                                                                                                                                                                                                                                                                                                                                                                                          |                    |
|---------|--------|-------|----|------------------------------------------------------------------------------------------------------------------------------------------------------------------------------------------------------------------------------------------------------------------------------------------------------------------------------------------------------------------------------------------------------------------------------------------------------------------------------------------|--------------------|
| NGO0264 | 0.0404 | 12.25 | up | putative bacteriocin production protein\ Context:(NC_002946)-[263603-264100]\ Notes:Best Blastp Hit: gb AAF62316.1  (AE002423) colicin V production protein; putative [Neisseria meningitidis MC58] COG1286 Uncharacterized membrane protein; required                                                                                                                                                                                                                                   | Cellular Processes |
| NGO0265 | 0.0419 | 2.33  | up | tetrapac protein\ Context:(NC_002946)-[264093-265133]\ Notes:Best Blastp Hit: emb CAA92429.1  (Z68205) tpc [Neisseria gonorrhoeae]                                                                                                                                                                                                                                                                                                                                                       | Cellular Processes |
| NGO0554 | 0.0008 | 52.81 | up | hypothetical protein\ Context:(NC_002946)+[531770-532720]\ Notes:Best Blastp Hit: sp Q03155 AIDA_ECOLI adhesin Aida-i precursor >gi 281809 pir  S28634 adhesin AIDA-I precursor - Escherichia coli plasmid pIB6 >gi 42255 emb CAA46156.1  (X65022) AIDA-I [Escherichia coli]                                                                                                                                                                                                             | Cellular Processes |
| NGO0595 | 0.0527 | 2.51  | up | hypothetical protein\ Context:(NC_002946)-[582130-582891]\ Notes:Best Blastp Hit: gb AAF41684.1  (AE002479) fimbrial biogenesis and twitching motility protein; putative [Neisseria meningitidis MC58]                                                                                                                                                                                                                                                                                   | Cellular Processes |
| NGO0771 | 0.0438 | 2.79  | up | putative exodeoxyribonuclease V alpha subunit\ Context:(NC_002946)+[765289-767034]\ Notes:Best Blastp Hit: gb AAC14132.1  (AF058330) RecD [Neisseria gonorrhoeae] COG0507 ATP-dependent exoDNase (exonuclease V)                                                                                                                                                                                                                                                                         | Cellular Processes |
| NGO0773 | 0.0320 | 2.27  | up | Irg1\ Context:(NC_002946)+[767722-768723]\ Notes:Best Blastp Hit: gb AAC82509.1  (U65994) pilin gene inverting protein homolog PivNG [Neisseria gonorrhoeae]; putative invertase related gene 1                                                                                                                                                                                                                                                                                          | Cellular Processes |
| NGO0775 | 0.0517 | 3.28  | up | hypothetical protein\ Context:(NC_002946)+[769563-772025]\ Notes:Best Blastp Hit: pir  H81106 ATP-dependent proteinase La NMB1231 [imported] - Neisseria meningitidis (group B strain MD58) >gi 7226470 gb AAF41612.1  (AE002471) ATP-dependent protease La [Neisseria meningitidis MC58] COG0466 ATP-dependent Lon protease; bacterial type                                                                                                                                             | Cellular Processes |
| NGO0813 | 0.0526 | 2.22  | up | putative biotin synthase\ Context:(NC_002946)-[805845-806897]\ Notes:Best Blastp Hit: pir  A81117 biotin synthetase NMB1146; NMB1184 [imported] - Neisseria meningitidis (group B strain MD58) >gi 7226383 gb AAF41533.1  (AE002463) biotin synthetase [Neisseria meningitidis MC58] >gi 7226421 gb AAF41568.1  (AE002466) biotin synthetase [Neisseria meningitidis MC58] COG0502 Biotin synthase and related enzymes                                                                   | Cellular Processes |
| NGO0874 | 0.0345 | 6.22  | up | type II DNA restriction endonuclease R.NGOI\ Context:(NC_002946)+[858005-858865]\ Notes:Best Blastp Hit: sp P31032 T2NM_NEIGO type II restriction enzyme Ngol (endonuclease NgomI) (R.NGOMI) >gi 281723 pir  B42709 DNA restriction endonuclease NgoMI - Neisseria gonorrhoeae >gi 5051443 emb CAB44951.1  (AJ242840) putative DNA restriction endonuclease [Neisseria gonorrhoeae] >gi 5262960 emb CAB45874.1  (AJ242839) putative DNA restriction endonuclease [Neisseria gonorrhoeae] | Cellular Processes |
| NGO1472 | 0.0238 | 2.62  | up | pyridine nucleotide transhydrogenase\ Context:(NC_002946)+[1435324-1436709]\ Notes:catalyzes reversible transfer of hydride ion equivalent between NAD and NADP; membrane-bound proton pump that translocates protons from cytosolic to periplasmic side of the inner membrane; forms a tetramer composed of two alpha and 2 beta subunits; AB-stereospecific enzyme                                                                                                                     | Cellular Processes |
| NGO1565 | 0.0452 | 3.21  | up | putative nicotinate-nucleotide pyrophosphorylase\ Context:(NC_002946)-[1536265-1537146]\ Notes:Best Blastp Hit: pir  A81780 nicotinate-nucleotide pyrophosphorylase (carboxylating) (EC 2.4.2.19) NMA2088 [imported] - Neisseria meningitidis (group A strain Z2491) >gi 7380713 emb CAB85304.1  (AL162758) nicotinate-nucleotide pyrophosphorylase [Neisseria meningitidis] COG0157 Nicotinate-nucleotide pyrophosphorylase                                                             | Cellular Processes |
| NGO1678 | 0.0228 | 3.13  | up | hypothetical protein\ Context:(NC_002946)+[1632061-1633245]\ Notes:Best Blastp Hit: emb CAB85376.1  (AL162758) putative monooxygenase [Neisseria meningitidis] COG0654 2-Octaprenyl-6-metoxyphe-nol hydroxylase                                                                                                                                                                                                                                                                          | Cellular Processes |



|         |        |      |    |                                                                                                                                                                                                                                                                                                                                                                                                                               |                                 |
|---------|--------|------|----|-------------------------------------------------------------------------------------------------------------------------------------------------------------------------------------------------------------------------------------------------------------------------------------------------------------------------------------------------------------------------------------------------------------------------------|---------------------------------|
| NGO1714 | 0.0469 | 2.15 | up | putative cis-trans isomerase\ Context:(NC_002946)-[1672744-1673745]\ Notes:Best Blastp Hit: >pir   B81216 peptidyl-prolyl cis-trans isomerase NMB0281 [imported] - Neisseria meningitidis (group B strain MD58) gb AAF40735.1  (AE002385) peptidyl-prolyl cis-trans isomerase [Neisseria meningitidis MC58] COG0760 Parvulin-like peptidyl-prolyl isomerase                                                                   | Cellular Processes              |
| NGO1983 | 0.0499 | 3.36 | up | hypothetical protein\ Context:(NC_002946)-[1957896-1958675]\ Notes:Best Blastp Hit: pir   C81008 methionine aminopeptidase NMB2093 [imported] - Neisseria meningitidis (group B strain MD58) >gi 7227355 gb AAF42410.1  (AE002558) methionine aminopeptidase [Neisseria meningitidis MC58] COG0024 Methionine aminopeptidase                                                                                                  | Cellular Processes              |
| NGO1992 | 0.0437 | 2.25 | up | putative Ngol restriction endonuclease\ Context:(NC_002946)+[1964908-1965960]\ Notes:Best Blastp Hit: gb AAB03207.2  (U42459) Ngol restriction endonuclease R.Ngol [Neisseria gonorrhoeae]                                                                                                                                                                                                                                    | Cellular Processes              |
| NGO0186 | 0.0358 | 2.33 | up | putative zinc-binding alcohol dehydrogenas\ Context:(NC_002946)-[186327-187391]\ Notes:Best Blastp Hit: pir   H81925 probable alcohol dehydrogenase (EC 1.1.1.-) NMA0808 [similarity] - Neisseria meningitidis (group A strain Z2491) >gi 7379528 emb CAB84091.1  (AL162754) putative zinc-binding alcohol dehydrogenase [Neisseria meningitidis] COG1065 Zn-dependent oxidoreductases                                        | Central Intermediary Metabolism |
| NGO0565 | 0.0435 | 2.11 | up | pyruvate dehydrogenase subunit E1\ Context:(NC_002946)-[546184-548847]\ Notes:E1 component; part of pyruvate dehydrogenase; forms a complex with DlaT and LpdC                                                                                                                                                                                                                                                                | Central Intermediary Metabolism |
| NGO0617 | 0.0205 | 2.63 | up | phosphopyruvate hydratase\ Context:(NC_002946)-[604935-606221]\ Notes:enolase; catalyzes the formation of phosphoenolpyruvate from 2-phospho-D-glycerate in glycolysis                                                                                                                                                                                                                                                        | Central Intermediary Metabolism |
| NGO0639 | 0.0196 | 2.91 | up | putative L-lactate dehydrogenase\ Context:(NC_002946)+[625991-627163]\ Notes:Best Blastp Hit: pir   C81852 L-lactate dehydrogenase (cytochrome) (EC 1.1.2.3) NMA1592 [imported] - Neisseria meningitidis (group A strain Z2491) >gi 7380233 emb CAB84819.1  (AL162756) L-lactate dehydrogenase [Neisseria meningitidis] COG1304 L-lactate dehydrogenase (FMN-dependent) and                                                   | Central Intermediary Metabolism |
| NGO0713 | 0.0098 | 3.25 | up | keto-hydroxyglutarate-aldolase/keto-deoxy- phosphogluconate aldolase\ Context:(NC_002946)-[712011-712649]\ Notes:catalyzes the formation of pyruvate and glyoxylate from 4-hydroxy-2-oxoglutarate; or pyruvate and D-glyceraldehyde 3-phosphate from 2-dehydro-3-deoxy-D-glyconate 6-phosphate                                                                                                                                | Central Intermediary Metabolism |
| NGO0719 | 0.0375 | 2.77 | up | glucose-6-phosphate isomerase\ Context:(NC_002946)+[719596-721242]\ Notes:functions in sugar metabolism in glycolysis and the Embden-Meyerhof pathways (EMP) and in gluconeogenesis; catalyzes reversible isomerization of glucose-6-phosphate to fructose-6-phosphate; member of PGI family                                                                                                                                  | Central Intermediary Metabolism |
| NGO0977 | 0.0379 | 5.23 | up | putative acetate kinase\ Context:(NC_002946)+[946790-948016]\ Notes:Best Blastp Hit: pir   A81868 acetate kinase (EC 2.7.2.1) NMA1718 [imported] - Neisseria meningitidis (group A strain Z2491) >gi 7380359 emb CAB84946.1  (AL162756) acetate kinase [Neisseria meningitidis] COG0282 Acetate kinase                                                                                                                        | Central Intermediary Metabolism |
| NGO1881 | 0.0312 | 3.86 | up | PykA\ Context:(NC_002946)+[1851528-1853000]\ Notes:Best Blastp Hit: pir   B81239 pyruvate kinase II NMB0089 [imported] - Neisseria meningitidis (group B strain MD58) >gi 7225307 gb AAF40552.1  (AE002368) pyruvate kinase II [Neisseria meningitidis MC58] COG0469 Pyruvate kinase; putative pyruvate kinase                                                                                                                | Central Intermediary Metabolism |
| NGO1931 | 0.0216 | 2.59 | up | GapC\ Context:(NC_002946)+[1908251-1909255]\ Notes:Best Blastp Hit: pir   B82019 glyceraldehyde-3-phosphate dehydrogenase (EC 1.2.1.12) C NMA0246 [imported] - Neisseria meningitidis (group A strain Z2491) >gi 7379008 emb CAB83554.1  (AL162752) glyceraldehyde 3-phosphate dehydrogenase C [Neisseria meningitidis] COG0057 Glyceraldehyde-3-phosphate dehydrogenase; putative glyceraldehyde 3-phosphate dehydrogenase C | Central Intermediary Metabolism |

|         |        |       |    |                                                                                                                                                                                                                                                                                                                                                                                                                                                                                                                                                                                                                                    |                      |
|---------|--------|-------|----|------------------------------------------------------------------------------------------------------------------------------------------------------------------------------------------------------------------------------------------------------------------------------------------------------------------------------------------------------------------------------------------------------------------------------------------------------------------------------------------------------------------------------------------------------------------------------------------------------------------------------------|----------------------|
| NGO0829 | 0.0393 | 5.26  | up | chaperone protein HscA\ Context:(NC_002946)-[816596-818458]\ Notes:involved in the maturation of iron-sulfur cluster-containing proteins                                                                                                                                                                                                                                                                                                                                                                                                                                                                                           | Chaperone            |
| NGO1422 | 0.0403 | 2.17  | up | putative heat shock protein\ Context:(NC_002946)-[1384782-1385360]\ Notes:Best Blastp Hit: pir   D81184 probable heat shock protein grpE NMA0744 [imported] - Neisseria meningitidis (group B strain MD58; group A strain Z2491) >gi 7225788 gb AAF40989.1  (AE002412) grpE protein [Neisseria meningitidis MC58] >gi 7379465 emb CAB84027.1  (AL162754) probable heat shock protein [Neisseria meningitidis] COG0576 Molecular chaperone GrpE (heat shock                                                                                                                                                                         | Chaperone            |
| NGO1429 | 0.0211 | 3.09  | up | molecular chaperone DnaK\ Context:(NC_002946)+[1390552-1392480]\ Notes:heat shock protein 70; assists in folding of nascent polypeptide chains; refolding of misfolded proteins; utilizes ATPase activity to help fold; co-chaperones are DnaJ and GrpE; multiple copies in some bacteria                                                                                                                                                                                                                                                                                                                                          | Chaperone            |
| NGO2094 | 0.0500 | 2.17  | up | co-chaperonin GroES\ Context:(NC_002946)+[2072506-2072796]\ Notes:10 kDa chaperonin; Cpn10; GroES; forms homoheptameric ring; binds to one or both ends of the GroEL double barrel in the presence of adenine nucleotides capping it; folding of unfolded substrates initiates in a GroEL-substrate bound and capped by GroES; release of the folded substrate is dependent on ATP binding and hydrolysis in the trans ring                                                                                                                                                                                                        | Chaperone            |
| NGO2095 | 0.0301 | 2.72  | up | chaperonin GroEL\ Context:(NC_002946)+[2072888-2074522]\ Notes:60 kDa chaperone family; promotes refolding of misfolded polypeptides especially under stressful conditions; forms two stacked rings of heptamers to form a barrel-shaped 14mer; ends can be capped by GroES; misfolded proteins enter the barrel where they are refolded when GroES binds; many bacteria have multiple copies of the groEL gene which are active under different environmental conditions; the B.japonicum protein in this cluster is expressed constitutively; in Rhodobacter; Corynebacterium and Rhizobium this protein is essential for growth | Chaperone            |
| NGO0636 | 0.0207 | 3.17  | up | putative NifS-like aminotransferase\ Context:(NC_002946)-[623952-625166]\ Notes:Best Blastp Hit: pir   E81852 NifS-like aminotranferase NMA1594 [imported] - Neisseria meningitidis (group A strain Z2491) >gi 7380235 emb CAB84821.1  (AL162756) NifS-like aminotranferase [Neisseria meningitidis] COG1104 Cysteine sulfinate desulfinate/cysteine                                                                                                                                                                                                                                                                               | Co-Factor Metabolism |
| NGO0405 | 0.0215 | 20.08 | up | DNA-damage-inducible protein D\ Context:(NC_002946)+[398238-399089]\ Notes:Best Blastp Hit: pir   G65165 DNA-damage-inducible protein d - Escherichia coli >gi 290495 gb AAA61998.1  (L10328) o278 [Escherichia coli] >gi 1790076 gb AAC76669.1  (AE000441) DNA-damage-inducible protein [Escherichia coli]                                                                                                                                                                                                                                                                                                                        | DNA Repair           |
| NGO0451 | 0.0395 | 2.16  | up | replicative DNA helicase\ Context:(NC_002946)+[445524-446930]\ Notes:unwinds double stranded DNA                                                                                                                                                                                                                                                                                                                                                                                                                                                                                                                                   | DNA Replication      |
| NGO0629 | 0.0380 | 6.43  | up | DNA gyrase subunit A\ Context:(NC_002946)-[618439-621189]\ Notes:Best Blastp Hit: sp P48371 GYRA_NEIGO DNA gyrase subunit A >gi 2120873 pir   S60779 DNA gyrase chain A - Neisseria gonorrhoeae >gi 529408 gb AAA82128.1  (U08817) DNA gyrase subunit A [Neisseria gonorrhoeae] COG0188 DNA gyrase (topoisomerase II) A subunit                                                                                                                                                                                                                                                                                                    | DNA Replication      |
| NGO2103 | 0.0465 | 5.81  | up | hypothetical protein\ Context:(NC_002946)+[2080439-2083231]\ Notes:Best Blastp Hit: pir   F81963 DNA-directed DNA polymerase (EC 2.7.7.7) I NMA0462 [imported] - Neisseria meningitidis (group A strain Z2491) >gi 7379209 emb CAB83758.1  (AL162753) DNA polymerase I [Neisseria meningitidis] COG0749 DNA polymerase I - 3'-5' exonuclease and                                                                                                                                                                                                                                                                                   | DNA Replication      |
| NGO0574 | 0.0061 | 3.64  | up | Cah\ Context:(NC_002946)-[559802-560560]\ Notes:Best Blastp Hit: sp Q50940 CAH_NEIGO carbonic anhydrase precursor (carbonate dehydratase) >gi 1841441 emb CAA72038.1  (Y11152) carbonic anhydrase [Neisseria gonorrhoeae]                                                                                                                                                                                                                                                                                                                                                                                                          | Energy Metabolism    |
| NGO1029 | 0.0126 | 3.04  | up | fumarate hydratase\ Context:(NC_002946)+[992677-994065]\ Notes:class II family (does not require metal); tetrameric enzyme; fumarase C; reversibly converts (S)-malate to fumarate and water; functions in the TCA cycle                                                                                                                                                                                                                                                                                                                                                                                                           | Energy Metabolism    |

|         |        |      |    |                                                                                                                                                                                                                                                                                                                                                                                                                     |                      |
|---------|--------|------|----|---------------------------------------------------------------------------------------------------------------------------------------------------------------------------------------------------------------------------------------------------------------------------------------------------------------------------------------------------------------------------------------------------------------------|----------------------|
| NGO0049 | 0.0101 | 4.24 | up | hypothetical protein\ Context:(NC_002946)-[47441-47974]\ Notes:Best Blastp Hit: possibly phase variable - 8A residue homopolymer repeat in the coding sequence (ON)                                                                                                                                                                                                                                                 | Hypothetical Protein |
| NGO0236 | 0.0195 | 4.53 | up | hypothetical protein\ Context:(NC_002946)-[239206-240492]\ Notes:Best Blastp Hit: pir   G81172 hypothetical protein NMB0667 [imported] - Neisseria meningitidis (group B strain MD58) >gi 7225893 gb AAF41085.1  (AE002421) hypothetical protein [Neisseria meningitidis MC58]                                                                                                                                      | Hypothetical Protein |
| NGO0322 | 0.0199 | 4.67 | up | hypothetical protein\ Context:(NC_002946)+[321265-321744]\ Notes:Best Blastp Hit: pir   G81162 hypothetical protein NMB0744 [imported] - Neisseria meningitidis (group B strain MD58) >gi 7225973 gb AAF41157.1  (AE002429) hypothetical protein [Neisseria meningitidis MC58]                                                                                                                                      | Hypothetical Protein |
| NGO0416 | 0.0292 | 2.69 | up | hypothetical protein\ Context:(NC_002946)+[413598-413921]\ Notes:Best Blastp Hit: pir   A81152 hypothetical protein NMB0844 [imported] - Neisseria meningitidis (group B strain MD58) >gi 7226079 gb AAF41255.1  (AE002437) hypothetical protein [Neisseria meningitidis MC58]                                                                                                                                      | Hypothetical Protein |
| NGO0420 | 0.0394 | 2.40 | up | hypothetical protein\ Context:(NC_002946)+[416315-417049]\ Notes:Best Blastp Hit: pir   A81871 probable periplasmic protein NMA1059 [imported] - Neisseria meningitidis (group A strain Z2491) >gi 7379755 emb CAB84323.1  (AL162755) putative periplasmic protein [Neisseria meningitidis]                                                                                                                         | Hypothetical Protein |
| NGO0543 | 0.0430 | 2.12 | up | hypothetical protein\ Context:(NC_002946)+[516352-517278]\ Notes:Best Blastp Hit: emb CAB84704.1  (AL162756) hypothetical protein NMA1470 [Neisseria meningitidis] COG0523 Putative GTPases (G3E family)                                                                                                                                                                                                            | Hypothetical Protein |
| NGO0563 | 0.0136 | 2.81 | up | hypothetical protein\ Context:(NC_002946)-[543910-544200]\ Notes:Best Blastp Hit: pir   G81094 hypothetical protein NMB1343 [imported] - Neisseria meningitidis (group B strain MD58) >gi 7226587 gb AAF41718.1  (AE002482) hypothetical protein [Neisseria meningitidis MC58]                                                                                                                                      | Hypothetical Protein |
| NGO0616 | 0.0268 | 6.49 | up | hypothetical protein\ Context:(NC_002946)-[604489-604767]\ Notes:Best Blastp Hit: gb AAF41662.1  (AE002477) conserved hypothetical protein [Neisseria meningitidis MC58] >gi 7380144 emb CAB84729.1  (AL162756) hypothetical protein [Neisseria meningitidis]                                                                                                                                                       | Hypothetical Protein |
| NGO0635 | 0.0198 | 2.96 | up | hypothetical protein\ Context:(NC_002946)-[623656-623946]\ Notes:Best Blastp Hit: pir   I50969 MHC class II beta chain - Melanochromis auratus (fragment) >gi 2147702 pir I50985 MHC class II beta chain - Melanochromis auratus (fragment) >gi 308982 gb AAA49352.1  (L17439) Mhc class II beta chain [Melanochromis auratus] >gi 309016 gb AAA49368.1  (L17463) MHC class II beta chain [Melanochromis auratus]   | Hypothetical Protein |
| NGO0661 | 0.0423 | 5.83 | up | hypothetical protein\ Context:(NC_002946)-[652253-653185]\ Notes:Best Blastp Hit: pir   F81091 conserved hypothetical protein NMB1357 [imported] - Neisseria meningitidis (group B strain MD58) >gi 7226602 gb AAF41731.1  (AE002484) conserved hypothetical protein [Neisseria meningitidis MC58]                                                                                                                  | Hypothetical Protein |
| NGO0698 | 0.0500 | 8.03 | up | hypothetical protein\ Context:(NC_002946)+[693136-693369]\ Notes:Best Blastp Hit: pir   G81152 probable DNA-binding protein NMA1039 [imported] - Neisseria meningitidis (group B strain MD58; group A strain Z2491) >gi 7226065 gb AAF41242.1  (AE002436) conserved hypothetical protein [Neisseria meningitidis MC58] >gi 7379741 emb CAB84308.1  (AL162754) putative DNA-binding protein [Neisseria meningitidis] | Hypothetical Protein |
| NGO0700 | 0.0201 | 7.98 | up | hypothetical protein\ Context:(NC_002946)+[694611-695171]\ Notes:Best Blastp Hit: pir   G69096 hypothetical protein MTH1717 - Methanobacterium thermoautotrophicum (strain Delta H) >gi 2622849 gb AAB86189.1  (AE000928) unknown [Methanobacterium thermoautotrophicum]                                                                                                                                            | Hypothetical Protein |

|         |        |       |    |                                                                                                                                                                                                                                                                                                                                                                                                                                                                                                                                                                                              |                              |
|---------|--------|-------|----|----------------------------------------------------------------------------------------------------------------------------------------------------------------------------------------------------------------------------------------------------------------------------------------------------------------------------------------------------------------------------------------------------------------------------------------------------------------------------------------------------------------------------------------------------------------------------------------------|------------------------------|
| NGO0742 | 0.0535 | 5.84  | up | hypothetical protein\ Context:(NC_002946)-[738883-739218]\ Notes:Best Blastp Hit: pir    E81082 conserved hypothetical protein NMB1444 [imported] - Neisseria meningitidis (group B strain MD58) >gi 7226685 gb AAF41804.1  (AE002494) conserved hypothetical protein [Neisseria meningitidis MC58] COG0718 Uncharacterized BCR; YbaB family                                                                                                                                                                                                                                                 | Hypothetical Protein         |
| NGO0757 | 0.0048 | 6.09  | up | hypothetical protein\ Context:(NC_002946)-[753640-754074]\ Notes:Best Blastp Hit: emb CAB84654.1  (AL162755) putative periplasmic protein [Neisseria meningitidis]                                                                                                                                                                                                                                                                                                                                                                                                                           | Hypothetical Protein         |
| NGO0822 | 0.0306 | 2.37  | up | hypothetical protein\ Context:(NC_002946)+[813087-813488]\ Notes:Best Blastp Hit: pir    A81119 conserved hypothetical protein NMB1138; NMB1176; NMA1348 [imported] - Neisseria meningitidis (group B strain MD58; group A strain Z2491) >gi 7226375 gb AAF41526.1  (AE002462) conserved hypothetical protein [Neisseria meningitidis MC58] >gi 7226413 gb AAF41561.1  (AE002465) conserved hypothetical protein [Neisseria meningitidis MC58] >gi 7380017 emb CAB84595.1  (AL162755) hypothetical protein NMA1348 [Neisseria meningitidis] COG1188 Predicted small RNA-binding protein (S4) | Hypothetical Protein         |
| NGO0826 | 0.0115 | 3.40  | up | hypothetical protein\ Context:(NC_002946)-[814963-815721]\ Notes:Best Blastp Hit: emb CAB84591.1  (AL162755) hypothetical protein NMA1343 [Neisseria meningitidis]                                                                                                                                                                                                                                                                                                                                                                                                                           | Hypothetical Protein         |
| NGO0828 | 0.0250 | 13.35 | up | hypothetical protein\ Context:(NC_002946)-[816373-816519]\ Notes:Best Blastp Hit: gb AAF41523.1  (AE002462) hypothetical protein [Neisseria meningitidis MC58] >gi 7226410 gb AAF41558.1  (AE002465) hypothetical protein [Neisseria meningitidis MC58]                                                                                                                                                                                                                                                                                                                                      | Hypothetical Protein         |
| NGO0994 | 0.0241 | 4.07  | up | Laz\ Context:(NC_002946)-[964627-965178]\ Notes:Best Blastp Hit: sp P07212 H8_NEIMC H.8 outer membrane protein precursor >gi 279443 pir   AZNHM azurin precursor - Neisseria meningitidis >gi 45042 emb CAA68589.1  (Y00530) outer membrane protein H.8 (AA 1-183) [Neisseria meningitidis]; lipid modified azurin protein                                                                                                                                                                                                                                                                   | Hypothetical Protein         |
| NGO1072 | 0.0451 | 2.16  | up | hypothetical protein\ Context:(NC_002946)+[1030403-1030687]\ Notes:                                                                                                                                                                                                                                                                                                                                                                                                                                                                                                                          | Hypothetical Protein         |
| NGO1321 | 0.0225 | 16.27 | up | hypothetical protein\ Context:(NC_002946)+[1279547-1280065]\ Notes:Best Blastp Hit: pir    H81820 probable lipoprotein NMA1930 [imported] - Neisseria meningitidis (group A strain Z2491) >gi 7380562 emb CAB85150.1  (AL162757) putative lipoprotein [Neisseria meningitidis]                                                                                                                                                                                                                                                                                                               | Hypothetical Protein         |
| NGO1411 | 0.0279 | 3.16  | up | hypothetical protein\ Context:(NC_002946)+[1374586-1376079]\ Notes:Best Blastp Hit: gb AAF40998.1  (AE002413) hypothetical protein [Neisseria meningitidis MC58]                                                                                                                                                                                                                                                                                                                                                                                                                             | Hypothetical Protein         |
| NGO1471 | 0.0490 | 2.08  | up | hypothetical protein\ Context:(NC_002946)+[1434861-1435244]\ Notes:Best Blastp Hit: pir    E81134 hypothetical protein NMB0979 [imported] - Neisseria meningitidis (group B strain MD58) >gi 7226219 gb AAF41383.1  (AE002449) hypothetical protein [Neisseria meningitidis MC58]                                                                                                                                                                                                                                                                                                            | Hypothetical Protein         |
| NGO1538 | 0.0248 | 3.75  | up | hypothetical protein\ Context:(NC_002946)-[1510582-1510764]\ Notes:Best Blastp Hit: emb CAB85285.1  (AL162758) putative periplasmic protein [Neisseria meningitidis]                                                                                                                                                                                                                                                                                                                                                                                                                         | Hypothetical Protein         |
| NGO1709 | 0.0464 | 4.11  | up | hypothetical protein\ Context:(NC_002946)+[1665456-1666070]\ Notes:Best Blastp Hit: possibly phase variable - 8A residue homopolymer repeat in the coding sequence (ON)                                                                                                                                                                                                                                                                                                                                                                                                                      | Hypothetical Protein         |
| NGO2111 | 0.0170 | 6.36  | up | hypothetical protein\ Context:(NC_002946)+[2095595-2097208]\ Notes:Best Blastp Hit: pir    B81021 conserved hypothetical protein NMB1971 [imported] - Neisseria meningitidis (group B strain MD58) >gi 7227232 gb AAF42300.1  (AE002545) conserved hypothetical protein [Neisseria meningitidis MC58]                                                                                                                                                                                                                                                                                        | Hypothetical Protein         |
| NGO0217 | 0.0077 | 3.41  | up | ABC transporter; periplasmic binding protein; iron related\ Context:(NC_002946)-[220733-221728]\ Notes:Best Blastp Hit: gb AAB63559.1  (U33937) binds iron in a manner similar to transferrin; periplasmic iron-binding protein; Method: conceptual translation supplied by author [Neisseria gonorrhoeae] >gi 1588872 prf   2209379A fbpA gene [Neisseria gonorrhoeae] COG1840 Thiamine-binding periplasmic proteins; FbpA                                                                                                                                                                  | Iron Storage and Acquisition |

|         |        |       |    |                                                                                                                                                                                                                                                                                                                                                                                                                                                                                                                                |                              |
|---------|--------|-------|----|--------------------------------------------------------------------------------------------------------------------------------------------------------------------------------------------------------------------------------------------------------------------------------------------------------------------------------------------------------------------------------------------------------------------------------------------------------------------------------------------------------------------------------|------------------------------|
| NGO0596 | 0.0373 | 2.28  | up | hypothetical protein\ Context:(NC_002946)-[582894-583988]\ Notes:Best Blastp Hit: pir     B81098 conserved hypothetical protein NMB1308 [imported] - Neisseria meningitidis (group B strain MD58) >gi 7226549 gb AAF41683.1  (AE002479) conserved hypothetical protein [Neisseria meningitidis MC58] COG0820 Predicted Fe-S-cluster redox enzyme                                                                                                                                                                               | Iron Storage and Acquisition |
| NGO0825 | 0.0151 | 4.20  | up | putative ferredoxin\ Context:(NC_002946)-[814566-814907]\ Notes:Best Blastp Hit: pir     E81118 ferredoxin [2Fe-2S] NMB1134; NMB1172; NMA1344 [similarity] - Neisseria meningitidis (group B strain MD58; group A strain Z2491) >gi 7226371 gb AAF41522.1  (AE002462) ferredoxin; 2Fe-2S type [Neisseria meningitidis MC58] >gi 7226409 gb AAF41557.1  (AE002465) ferredoxin; 2Fe-2S type [Neisseria meningitidis MC58] >gi 7380014 emb CAB84592.1  (AL162755) putative ferredoxin [Neisseria meningitidis] COG0633 Ferredoxin | Iron Storage and Acquisition |
| NGO0952 | 0.0393 | 3.14  | up | putative TonB-dependent receptor protein\ Context:(NC_002946)+[926135-928903]\ Notes:Best Blastp Hit: emb CAB84928.1  (AL162756) putative outer membrane substrate binding protein [Neisseria meningitidis] COG1629 Outer membrane receptor proteins; mostly Fe                                                                                                                                                                                                                                                                | Iron Storage and Acquisition |
| NGO1377 | 0.0303 | 3.54  | up | hypothetical protein\ Context:(NC_002946)-[1342420-1342854]\ Notes:Best Blastp Hit: sp O06434 EXBD_NEIGO biopolymer transport ExbD protein >gi 2098623 gb AAC45288.1  (U79563) ExbD [Neisseria gonorrhoeae] COG0848 biopolymer transport protein ExbD                                                                                                                                                                                                                                                                          | Iron Storage and Acquisition |
| NGO1378 | 0.0315 | 3.54  | up | ExbB\ Context:(NC_002946)-[1342857-1343567]\ Notes:Best Blastp Hit: sp O06433 EXBB_NEIGO biopolymer transport ExbB protein >gi 2098622 gb AAC45287.1  (U79563) ExbB [Neisseria gonorrhoeae] COG0811 biopolymer transport proteins                                                                                                                                                                                                                                                                                              | Iron Storage and Acquisition |
| NGO1495 | 0.0013 | 7.11  | up | TbpA\ Context:(NC_002946)-[1460228-1462966]\ Notes:Best Blastp Hit: gb AAF74987.1  (AF124339) transferrin-binding protein A [Neisseria gonorrhoeae] COG1629 Outer membrane receptor proteins; mostly                                                                                                                                                                                                                                                                                                                           | Iron Storage and Acquisition |
| NGO1496 | 0.0005 | 10.24 | up | TbpB\ Context:(NC_002946)-[1463053-1465164]\ Notes:Best Blastp Hit: possibly phase variable - 8T residue homopolymer repeat in the coding sequence (ON); transferrin-binding protein B                                                                                                                                                                                                                                                                                                                                         | Iron Storage and Acquisition |
| NGO2092 | 0.0348 | 5.19  | up | ferric enterobactin periplasmic binding protein\ Context:(NC_002946)-[2068734-2069705]\ Notes:Best Blastp Hit: gb AAD29611.1 AF115385_1 (AF115385) putative ferric enterobactin periplasmic binding protein [Neisseria gonorrhoeae] COG0614 Ferrichrome-binding periplasmic proteins                                                                                                                                                                                                                                           | Iron Storage and Acquisition |
| NGO2093 | 0.0048 | 20.11 | up | FetA\ Context:(NC_002946)-[2069857-2071998]\ Notes:Best Blastp Hit: possibly phase variable - 8T residue homopolymer repeat in the coding sequence (ON) COG1629 Outer membrane receptor proteins; mostly Fe; ferric enterobactin receptor                                                                                                                                                                                                                                                                                      | Iron Storage and Acquisition |
| NGO1803 | 0.0395 | 3.30  | up | UDP-3-O-[3-hydroxymyristoyl] glucosamine N-acyltransferase\ Context:(NC_002946)+[1776598-1777641]\ Notes:adds the O-linked and N-linked 3(R)-hydroxy fatty acids to the glucosamine disaccharide during lipid A biosynthesis                                                                                                                                                                                                                                                                                                   | Lipid/LPS Biosynthesis       |
| NGO0475 | 0.0497 | 3.32  | up | putative phage associated protein\ Context:(NC_002946)-[462203-462403]\ Notes:                                                                                                                                                                                                                                                                                                                                                                                                                                                 | Phage Associated Protein     |
| NGO1120 | 0.0517 | 2.02  | up | putative phage associated protein\ Context:(NC_002946)+[1072684-1072884]\ Notes:                                                                                                                                                                                                                                                                                                                                                                                                                                               | Phage Associated Protein     |
| NGO0344 | 0.0532 | 2.32  | up | GTP-binding protein LepA\ Context:(NC_002946)-[338704-340497]\ Notes:binds to the ribosome on the universally-conserved alpha-sarcin loop                                                                                                                                                                                                                                                                                                                                                                                      | Protein Synthesis            |
| NGO0607 | 0.0320 | 7.38  | up | hypothetical protein\ Context:(NC_002946)-[593892-594584]\ Notes:Best Blastp Hit: gb AAF41674.1  (AE002478) ribosomal small subunit pseudouridine synthase A [Neisseria meningitidis MC58] >gi 7380155 emb CAB84740.1  (AL162756) putative ribosomal small subunit pseudouridine synthase [Neisseria meningitidis] COG1187 Predicted pseudouridylate synthase family 1                                                                                                                                                         | Protein Synthesis            |

|         |        |       |    |                                                                                                                                                                                                                                                                                                                                                                                                                                                                                                                                                                                                                                                                                                                                         |                                  |
|---------|--------|-------|----|-----------------------------------------------------------------------------------------------------------------------------------------------------------------------------------------------------------------------------------------------------------------------------------------------------------------------------------------------------------------------------------------------------------------------------------------------------------------------------------------------------------------------------------------------------------------------------------------------------------------------------------------------------------------------------------------------------------------------------------------|----------------------------------|
| NGO0660 | 0.0294 | 3.97  | up | aspartyl/glutamyl-tRNA amidotransferase subunit B\ Context:(NC_002946)-[650780-652210]\ Notes:allows the formation of correctly charged Asn-tRNA(Asn) or Gln-tRNA(Gln) through the transamidation of misacylated Asp-tRNA(Asn) or Glu-tRNA(Gln) in organisms which lack either or both of asparaginyl-tRNA or glutaminyl-tRNA synthetases; reaction takes place in the presence of glutamine and ATP through an activated phospho-Asp-tRNA(Asn) or phospho-Glu-tRNA                                                                                                                                                                                                                                                                     | Protein Synthesis                |
| NGO2126 | 0.0092 | 11.59 | up | 50S ribosomal protein L31\ Context:(NC_002946)+[2108958-2109173]\ Notes:RpmE; there appears to be two types of ribosomal proteins L31 in bacterial genomes; some contain a CxxC motif while others do not; Bacillus subtilis has both types; the proteins in this cluster have the CXXC motif; RpmE is found in exponentially growing Bacilli while YtiA was found after exponential growth; expression of ytiA is controlled by a zinc-specific transcriptional repressor; RpmE contains one zinc ion and a CxxC motif is responsible for this binding; forms an RNP particle along with proteins L5; L18; and L25 and 5S rRNA; found crosslinked to L2 and L25 and EF-G; may be near the peptidyltransferase site of the 50S ribosome | Protein Synthesis                |
| NGO2154 | 0.0455 | 3.10  | up | glycyl-tRNA synthetase subunit beta\ Context:(NC_002946)+[2129534-2131597]\ Notes:glycine--tRNA ligase beta chain; glyS; class II aminoacyl tRNA synthetase; tetramer of alpha(2)beta(2); catalyzes a two-step reaction; first charging a glycine molecule by linking the carboxyl group to the alpha-phosphate of ATP; second by transfer of the aminoacyl-adenylate to its tRNA                                                                                                                                                                                                                                                                                                                                                       | Protein Synthesis                |
| NGO0048 | 0.0276 | 2.83  | up | carbamoyl phosphate synthase large subunit\ Context:(NC_002946)-[44215-47430]\ Notes:four CarB-CarA dimers form the carbamoyl phosphate synthetase holoenzyme that catalyzes the production of carbamoyl phosphate; CarB is responsible for the amidotransferase activity                                                                                                                                                                                                                                                                                                                                                                                                                                                               | Purine and Pyrimidine Metabolism |
| NGO0614 | 0.0479 | 2.17  | up | ribonucleotide-diphosphate reductase subunit alpha\ Context:(NC_002946)+[600312-602591]\ Notes:Catalyzes the rate-limiting step in dNTP synthesis                                                                                                                                                                                                                                                                                                                                                                                                                                                                                                                                                                                       | Purine and Pyrimidine Metabolism |
| NGO1308 | 0.0329 | 9.45  | up | putativeguanosine-3';5'-bis(diphosphate)3'-pyrophosphohydrolase\ Context:(NC_002946)-[1265171-1267327]\ Notes:Best Blastp Hit: pir   B81058 guanosine-3';5'-bis(diphosphate) 3'-pyrophosphohydrolase NMB1659 [imported] - Neisseria meningitidis (group B strain MD58) >gi 7226911 gb AAF42008.1  (AE002516) guanosine-3';5'-bis(diphosphate) 3'-pyrophosphohydrolase [Neisseria meningitidis MC58] COG0317 Guanosine polyphosphate                                                                                                                                                                                                                                                                                                     | Purine and Pyrimidine Metabolism |
| NGO1540 | 0.0157 | 4.58  | up | Dca\ Context:(NC_002946)-[1512244-1513890]\ Notes:Best Blastp Hit: gb AAF12796.1 AF195057_1 (AF195057) DcaA [Neisseria gonorrhoeae] COG2194 Predicted membrane-associated; division cell wall protein                                                                                                                                                                                                                                                                                                                                                                                                                                                                                                                                   | Replication                      |
| NGO0650 | 0.0061 | 7.45  | up | putative ATP-dependent RNA helicase\ Context:(NC_002946)-[639282-640670]\ Notes:Best Blastp Hit: gb AAF41742.1  (AE002485) ATP-dependent RNA helicase; putative [Neisseria meningitidis MC58] COG0513 Superfamily II DNA and RNA helicases                                                                                                                                                                                                                                                                                                                                                                                                                                                                                              | Transcription                    |
| NGO1850 | 0.0308 | 4.23  | up | DNA-directed RNA polymerase subunit beta'\ Context:(NC_002946)-[1815110-1819285]\ Notes:DNA-dependent RNA polymerase catalyzes the transcription of DNA into RNA using the four ribonucleoside triphosphates as substrates. Subunit beta' binds to sigma factor allowing it to bind to the -10 region of the promoter                                                                                                                                                                                                                                                                                                                                                                                                                   | Transcription                    |
| NGO1851 | 0.0205 | 3.15  | up | DNA-directed RNA polymerase subunit beta\ Context:(NC_002946)-[1819438-1823616]\ Notes:DNA-dependent RNA polymerase catalyzes the transcription of DNA into RNA using the four ribonucleoside triphosphates as substrates; beta subunit is part of the catalytic core which binds with a sigma factor to produce the holoenzyme                                                                                                                                                                                                                                                                                                                                                                                                         | Transcription                    |
| NGO0025 | 0.0443 | 3.77  | up | AraC family transcriptional regulator\ Context:(NC_002946)+[21326-22282]\ Notes:Best Blastp Hit: emb CAB83869.1  (AL162753) putative araC-family transcriptional regulator [Neisseria meningitidis] COG2207 AraC-type DNA-binding domain-containing                                                                                                                                                                                                                                                                                                                                                                                                                                                                                     | Transcriptional Regulator        |

| NGO0608   | 0.0251  | 23.31                                  | up         | putative murein transglycosylase / nitrite reductase transcriptional regulator\ Context:(NC_002946)-[594652-596628]\ Notes:Best Blastp Hit: pir     D81842 probable membrane bound murein transglycosylase NMA1507 [imported] - Neisseria meningitidis (group A strain Z2491) >gi 7380154 emb CAB84739.1  (AL162756) putative membrane bound murein transglycosylase [Neisseria meningitidis] COG0741 Soluble lytic murein transglycosylase and                                              | Transcriptional Regulator              |
|-----------|---------|----------------------------------------|------------|----------------------------------------------------------------------------------------------------------------------------------------------------------------------------------------------------------------------------------------------------------------------------------------------------------------------------------------------------------------------------------------------------------------------------------------------------------------------------------------------|----------------------------------------|
| NGO0718   | 0.0539  | 5.54                                   | up         | RpiR family transcriptional regulator\ Context:(NC_002946)+[718522-719370]\ Notes:Best Blastp Hit: pir     D81089 RpiR/YebK/YfhH family protein NMB1389 [imported] - Neisseria meningitidis (group B strain MD58; group A strain Z2491) >gi 7226627 gb AAF41753.1  (AE002487) RpiR/YebK/YfhH family protein [Neisseria meningitidis MC58] >gi 7380248 emb CAB84834.1  (AL162756) putative transcriptional regulator [Neisseria meningitidis] COG1737 Transcriptional regulators; RpiR family | Transcriptional Regulator              |
| NGO0094   | 0.0218  | 7.26                                   | up         | hypothetical protein\ Context:(NC_002946)-[103398-105569]\ Notes:Best Blastp Hit: pir     S70838 pilQ protein - Neisseria gonorrhoeae >gi 1173875 gb AAC43603.1  (U40596) PilQ [Neisseria gonorrhoeae] >gi 1589217 prf    2210365A pilQ gene [Neisseria gonorrhoeae] COG1450 General secretion pathway protein D                                                                                                                                                                             | Transportation                         |
| NGO0189   | 0.0349  | 2.24                                   | up         | preprotein translocase subunit SecD\ Context:(NC_002946)+[189979-191835]\ Notes:part of the preprotein secretory system; when complexed with proteins SecF and YajC; SecDFyajC stimulates the proton motive force-driven protein translocation; and appears to be required for the release of mature proteins from the extracytoplasmic side of the membrane                                                                                                                                 | Transportation                         |
| NGO0374   | 0.0191  | 2.56                                   | up         | putative ABC transporter; ATP-binding protein; amino acid\ Context:(NC_002946)+[367901-368656]\ Notes:Best Blastp Hit: pir     F81947 probable amino acid permease ATP-binding protein NMA1000 [imported] - Neisseria meningitidis (group A strain Z2491) >gi 7379702 emb CAB84269.1  (AL162754) putative amino acid permease ATP-binding protein [Neisseria meningitidis] COG1126 ABC-type polar amino acid transport system                                                                | Transportation                         |
| NGO1440   | 0.0356  | 2.29                                   | up         | putative ABC transporter; periplasmic protein\ Context:(NC_002946)-[1405167-1406345]\ Notes:Best Blastp Hit: emb CAB84012.1  (AL162754) putative periplasmic protein [Neisseria meningitidis] COG0845 Membrane permeases; predicted cation efflux                                                                                                                                                                                                                                            | Transportation                         |
| NGO1485   | 0.0334  | 3.28                                   | up         | hypothetical protein\ Context:(NC_002946)-[1447712-1449178]\ Notes:Best Blastp Hit: pir     A81194 C4-dicarboxylate transporter NMB0470 [imported] - Neisseria meningitidis (group B strain MD58) >gi 7225698 gb AAF40907.1  (AE002404) C4-dicarboxylate transporter [Neisseria meningitidis MC58] COG0471 Cation transporters                                                                                                                                                               | Transportation                         |
| Locus Tag | p value | <i>nrrF</i> mutant Fe-/Fe+ Fold Change | Regulation | Probe Comment                                                                                                                                                                                                                                                                                                                                                                                                                                                                                | Biological Category                    |
| NGO0082   | 0.0289  | -5.37                                  | down       | valine--pyruvate transaminase\ Context:(NC_002946)-[87553-88845]\ Notes:transaminase C; catalyzes transamination of alanine; valine; and 2-aminobutyrate with their respective 2-keto acids; also catalyzes terminal step in valine biosynthesis                                                                                                                                                                                                                                             | Amino Acid Biosynthesis and Metabolism |
| NGO0118   | 0.0236  | -3.33                                  | down       | N-acetyl-gamma-glutamyl-phosphate reductase\ Context:(NC_002946)-[130990-132033]\ Notes:catalyzes the reduction of N-acetyl-5-glutamyl phosphate to N-acetyl-L-glutamate 5-semialdehyde in arginine biosynthesis and the reduction of N-acetyl-gamma-aminoadipyl-phosphate to N-acetyl-L-aminoadipate-semialdehyde in lysine biosynthesis; involved in both the arginine and lysine biosynthetic pathways; lysine is produced via the AAA pathway; lysine from alpha-aminoadipate            | Amino Acid Biosynthesis and Metabolism |
| NGO0261   | 0.0001  | -36.92                                 | down       | N-(5'-phosphoribosyl)anthranilate isomerase\ Context:(NC_002946)-[260589-261215]\ Notes:catalyzes the formation of 1-(2-carboxyphenylamino)-1-deoxy-D-ribose 5-phosphate from N-(5-phospho-beta-D-ribose)-anthranilate in tryptophan biosynthesis                                                                                                                                                                                                                                            | Amino Acid Biosynthesis and Metabolism |

|         |        |        |      |                                                                                                                                                                                                                                                                                                                            |                                                |
|---------|--------|--------|------|----------------------------------------------------------------------------------------------------------------------------------------------------------------------------------------------------------------------------------------------------------------------------------------------------------------------------|------------------------------------------------|
| NGO0333 | 0.0381 | -3.38  | down | phosphoribosylaminoimidazole-succinocarboxamidesynthase\ Context:(NC_002946)+[328606-329565]\ Notes:catalyzes the formation of (S)-2-(5-amino-1-(5-phospho-D-ribosyl)imidazole-4-carboxamido)succinate from 5-amino-1-(5-phospho-D-ribosyl)imidazole-4-carboxylate and L-aspartate in purine biosynthesis; SAICAR synthase | Amino Acid Biosynthesis and Metabolism         |
| NGO0844 | 0.0052 | -6.57  | down | acetylglutamate kinase\ Context:(NC_002946)-[827592-828488]\ Notes:catalyzes the phosphorylation of N-acetyl-L-glutamate to form N-acetyl-L-glutamate 5-phosphate                                                                                                                                                          | Amino Acid Biosynthesis and Metabolism         |
| NGO0850 | 0.0015 | -21.58 | down | gamma-glutamyl phosphate reductase\ Context:(NC_002946)+[834819-836081]\ Notes:Catalyzes the phosphorylation of L-glutamate during the proline biosynthesis pathway                                                                                                                                                        | Amino Acid Biosynthesis and Metabolism         |
| NGO1183 | 0.0123 | -5.76  | down | phosphoribosylformylglycinamide synthase\ Context:(NC_002946)+[1124290-1128246]\ Notes:catalyzes the formation of 2-(formamido)-N1-(5-phospho-D-ribosyl)acetamide from N2-formyl-N1-(5-phospho-D-ribosyl)glycinamide and L-glutamine in purine biosynthesis                                                                | Amino Acid Biosynthesis and Metabolism         |
| NGO1204 | 0.0317 | -4.57  | down | anthranilate synthase component II\ Context:(NC_002946)-[1150419-1151009]\ Notes:TrpG; with TrpE catalyzes the formation of anthranilate and glutamate from chorismate and glutamine; TrpG provides the glutamine amidotransferase activity                                                                                | Amino Acid Biosynthesis and Metabolism         |
| NGO1232 | 0.0028 | -5.42  | down | ornithine carbamoyltransferase\ Context:(NC_002946)+[1183114-1184109]\ Notes:catalyzes the formation of ornithine and carbamylphosphate from citrulline in the arginine catabolic pathway                                                                                                                                  | Amino Acid Biosynthesis and Metabolism         |
| NGO1325 | 0.0281 | -3.91  | down | glycine dehydrogenase\ Context:(NC_002946)+[1281812-1284664]\ Notes:acts in conjunction with GvcH to form H-protein-S-aminomethylidihydrolypyllysine from glycine                                                                                                                                                          | Amino Acid Biosynthesis and Metabolism         |
| NGO1331 | 0.0063 | -4.23  | down | chorismate synthase\ Context:(NC_002946)+[1289738-1290838]\ Notes:catalyzes the formation of chorismate from 5-O-(1-carboxyvinyl)-3-phosphoshikimate in aromatic amino acid biosynthesis                                                                                                                                   | Amino Acid Biosynthesis and Metabolism         |
| NGO1406 | 0.0308 | -8.61  | down | glycine cleavage system aminomethyltransferase T\ Context:(NC_002946)-[1371197-1372297]\ Notes:catalyzes the transfer of a methylene carbon from the methylamine-loaded GcvH protein to tetrahydrofolate; causing the release of ammonia and the generation of reduced GcvH protein                                        | Amino Acid Biosynthesis and Metabolism         |
| NGO1423 | 0.0453 | -4.83  | down | hypothetical protein\ Context:(NC_002946)+[1385543-1386361]\ Notes:Best Blastp Hit: possibly phase variable - 8A residue homopolymer repeat in the coding sequence (ON) COG1045 Serine acetyltransferase                                                                                                                   | Amino Acid Biosynthesis and Metabolism         |
| NGO1521 | 0.0016 | -14.09 | down | putative acetate kinase\ Context:(NC_002946)-[1487852-1489051]\ Notes:Best Blastp Hit: pir   D81198 acetate kinase NMB0435 [imported] - Neisseria meningitidis (group B strain MD58) >gi 7225660 gb AAF40873.1  (AE002400) acetate kinase [Neisseria meningitidis MC58] COG0282 Acetate kinase                             | Amino Acid Biosynthesis and Metabolism         |
| NGO1602 | 0.0032 | -4.82  | down | putative shikimate dehydrogenase\ Context:(NC_002946)+[1573802-1574611]\ Notes:Best Blastp Hit: gb AAC44913.1  (U82842) shikimate dehydrogenase [Neisseria gonorrhoeae] COG0169 Shikimate 5-dehydrogenase                                                                                                                  | Amino Acid Biosynthesis and Metabolism         |
| NGO1778 | 0.0010 | -5.69  | down | leucyl/phenylalanyl-tRNA--protein transferase\ Context:(NC_002946)-[1748121-1748846]\ Notes:leucyltransferase; phenylalanyltransferase; functions in the N-end rule pathway; transfers Leu; Phe; Met; from aminoacyl-tRNAs to N-terminal of proteins with Arg or Lys                                                       | Amino Acid Biosynthesis and Metabolism         |
| NGO1808 | 0.0016 | -24.23 | down | D-amino acid dehydrogenase small subunit\ Context:(NC_002946)+[1781771-1783030]\ Notes:catalyzes the oxidative deamination of D-amino acids                                                                                                                                                                                | Amino Acid Biosynthesis and Metabolism         |
| NGO2041 | 0.0132 | -16.45 | down | thiamine biosynthesis protein ThiC\ Context:(NC_002946)+[2011464-2013365]\ Notes:required for the synthesis of the hydromethylpyrimidine moiety of thiamine                                                                                                                                                                | Amino Acid Biosynthesis and Metabolism         |
| NGO0112 | 0.0053 | -12.40 | down | putative two-component system sensor kinase\ Context:(NC_002946)+[124550-125800]\ Notes:Best Blastp Hit: gb AAG24266.1 AF139612_3 (AF139612) BasS [Neisseria gonorrhoeae] COG0642 Sensory transduction histidine kinases                                                                                                   | Cell Communication and Outer Membrane Proteins |



|         |        |        |      |                                                                                                                                                                                                                                                                                                                                                                                                                                 |                                                |
|---------|--------|--------|------|---------------------------------------------------------------------------------------------------------------------------------------------------------------------------------------------------------------------------------------------------------------------------------------------------------------------------------------------------------------------------------------------------------------------------------|------------------------------------------------|
| NGO0140 | 0.0120 | -24.19 | down | hypothetical protein\ Context:(NC_002946)-[148156-148692]\ Notes:Best Blastp Hit: pir    D81914 probable membrane protein NMA0712 [imported] - Neisseria meningitidis (group A strain Z2491) >gi 7379436 emb CAB83998.1  (AL162754) putative membrane protein [Neisseria meningitidis] COG1238 Uncharacterized membrane protein                                                                                                 | Cell Communication and Outer Membrane Proteins |
| NGO0237 | 0.0083 | -16.59 | down | N-acetyl-anhydromuranmyl-L-alanine amidase\ Context:(NC_002946)-[240686-241258]\ Notes:Best Blastp Hit: pir    F81932 probable anhydro-N-acetylmuramyl-tripeptide amidase NMA0867 [imported] - Neisseria meningitidis (group A strain Z2491) >gi 7379582 emb CAB84147.1  (AL162754) putative anhydro-N-acetylmuramyl-tripeptide amidase [Neisseria meningitidis]                                                                | Cell Communication and Outer Membrane Proteins |
| NGO0534 | 0.0036 | -13.40 | down | putative alginate O-acetylation - like protein\ Context:(NC_002946)-[507713-509149]\ Notes:Best Blastp Hit: pir    C81103 alginate O-acetylation protein AlgI; probable NMB1273 [imported] - Neisseria meningitidis (group B strain MD58) >gi 7226512 gb AAF41650.1  (AE002475) alginate O-acetylation protein AlgI; putative [Neisseria meningitidis MC58] COG1696 Predicted membrane protein involved in                      | Cell Communication and Outer Membrane Proteins |
| NGO0798 | 0.0370 | -19.51 | down | putative uridylyltransferase\ Context:(NC_002946)+[786351-788909]\ Notes:Best Blastp Hit: pir    B81110 protein-Pil uridylyltransferase NMB1203 [imported] - Neisseria meningitidis (group B strain MD58) >gi 7226440 gb AAF41585.1  (AE002468) protein-Pil uridylyltransferase [Neisseria meningitidis MC58]                                                                                                                   | Cell Communication and Outer Membrane Proteins |
| NGO0868 | 0.0174 | -10.27 | down | OpcA\ Context:(NC_002946)+[851492-852283]\ Notes:Best Blastp Hit: emb CAB45007.1  (AJ242839) OpcA protein [Neisseria gonorrhoeae]; class 5 outer membrane protein                                                                                                                                                                                                                                                               | Cell Communication and Outer Membrane Proteins |
| NGO0869 | 0.0501 | -4.79  | down | hypothetical protein\ Context:(NC_002946)+[852434-853078]\ Notes:Best Blastp Hit: pir    D81128 dedA protein NMB1052 [imported] - Neisseria meningitidis (group B strain MD58; group A strain Z2491) >gi 7226292 gb AAF41450.1  (AE002455) dedA protein [Neisseria meningitidis MC58] >gi 7379932 emb CAB84505.1  (AL162755) DedA protein ortholog [Neisseria meningitidis] COG0586 Uncharacterized membrane-associated protein | Cell Communication and Outer Membrane Proteins |
| NGO1042 | 0.0084 | -9.90  | down | hypothetical protein\ Context:(NC_002946)+[1003525-1003908]\ Notes:Best Blastp Hit: pir    C81863 probable membrane protein NMA1680 [imported] - Neisseria meningitidis (group A strain Z2491) >gi 7380321 emb CAB84908.1  (AL162756) putative membrane protein [Neisseria meningitidis]                                                                                                                                        | Cell Communication and Outer Membrane Proteins |
| NGO1155 | 0.0228 | -7.72  | down | hypothetical protein\ Context:(NC_002946)-[1096079-1096537]\ Notes:Best Blastp Hit: pir    G64866 probable membrane protein b1202 - Escherichia coli >gi 1787452 gb AAC74286.1  (AE000218) putative adhesion and penetration protein [Escherichia coli]                                                                                                                                                                         | Cell Communication and Outer Membrane Proteins |
| NGO1193 | 0.0295 | -6.85  | down | hypothetical protein\ Context:(NC_002946)+[1135218-1135910]\ Notes:Best Blastp Hit: pir    B81017 conserved hypothetical protein NMB2004 [imported] - Neisseria meningitidis (group B strain MD58) >gi 7227268 gb AAF42331.1  (AE002550) conserved hypothetical protein [Neisseria meningitidis MC58] COG1346 Predicted membrane protein; YohK family                                                                           | Cell Communication and Outer Membrane Proteins |
| NGO1398 | 0.0004 | -20.07 | down | hypothetical protein\ Context:(NC_002946)-[1360715-1361545]\ Notes:Best Blastp Hit: pir    T44663 nosY protein [imported] - Bradyrhizobium japonicum >gi 3850617 emb CAA05522.1  (AJ002531) nosY [Bradyrhizobium japonicum] COG1277 Predicted membrane protein                                                                                                                                                                  | Cell Communication and Outer Membrane Proteins |
| NGO1500 | 0.0208 | -4.37  | down | glutamate racemase\ Context:(NC_002946)-[1468907-1469719]\ Notes:converts L-glutamate to D-glutamate; a component of peptidoglycan                                                                                                                                                                                                                                                                                              | Cell Communication and Outer Membrane Proteins |
| NGO1599 | 0.0090 | -8.00  | down | AmpG\ Context:(NC_002946)-[1570641-1571924]\ Notes:Best Blastp Hit: possibly phase variable - 8T residue homopolymer repeat in the coding sequence (ON) COG0477 Permeases; putative signal transducer protein                                                                                                                                                                                                                   | Cell Communication and Outer Membrane Proteins |

|         |        |        |      |                                                                                                                                                                                                                                                                                                                                                                                                                   |                                                |
|---------|--------|--------|------|-------------------------------------------------------------------------------------------------------------------------------------------------------------------------------------------------------------------------------------------------------------------------------------------------------------------------------------------------------------------------------------------------------------------|------------------------------------------------|
| NGO1692 | 0.0073 | -4.89  | down | hypothetical protein\ Context:(NC_002946)+[1644722-1645159]\ Notes:Best Blastp Hit: pir     F81790 conserved hypothetical inner membrane protein NMA2177 [imported] - Neisseria meningitidis (group A strain Z2491) >gi 7380798 emb CAB85389.1  (AL162758) conserved hypothetical inner membrane protein [Neisseria meningitidis] COG1981 Predicted membrane protein                                              | Cell Communication and Outer Membrane Proteins |
| NGO1718 | 0.0003 | -16.75 | down | hypothetical protein\ Context:(NC_002946)+[1678525-1680063]\ Notes:Best Blastp Hit: pir     B81217 virulence factor MviN NMB0277 [imported] - Neisseria meningitidis (group B strain MD58) >gi 7225502 gb AAF40731.1  (AE002384) virulence factor MviN [Neisseria meningitidis MC58] COG0728 Uncharacterized membrane protein; putative                                                                           | Cell Communication and Outer Membrane Proteins |
| NGO1768 | 0.0009 | -36.42 | down | hypothetical protein\ Context:(NC_002946)+[1732787-1733353]\ Notes:Best Blastp Hit: pir     C81224 conserved hypothetical protein NMB0215 [imported] - Neisseria meningitidis (group B strain MD58) >gi 7225437 gb AAF40671.1  (AE002379) conserved hypothetical protein [Neisseria meningitidis MC58] COG1971 Predicted membrane protein                                                                         | Cell Communication and Outer Membrane Proteins |
| NGO1910 | 0.0086 | -11.15 | down | hypothetical protein\ Context:(NC_002946)+[1883748-1885898]\ Notes:Best Blastp Hit: pir     H81242 conserved hypothetical protein NMB0050 [imported] - Neisseria meningitidis (group B strain MD58) >gi 7225270 gb AAF40519.1  (AE002364) conserved hypothetical protein [Neisseria meningitidis MC58] COG1289 Uncharacterized membrane protein; YhfK                                                             | Cell Communication and Outer Membrane Proteins |
| NGO0032 | 0.0025 | -8.44  | down | hypothetical protein\ Context:(NC_002946)-[28180-28857]\ Notes:Best Blastp Hit: pir     F81977 hypothetical protein NMA0585 [imported] - Neisseria meningitidis (group A strain Z2491) >gi 7379321 emb CAB83876.1  (AL162753) hypothetical protein NMA0585 [Neisseria meningitidis] COG1214 Inactive homologs of metal-dependent                                                                                  | Cellular Processes                             |
| NGO0057 | 0.0008 | -13.27 | down | putative thioredoxin\ Context:(NC_002946)+[58575-59084]\ Notes:Best Blastp Hit: emb   CAB83902.1   (AL162753) putative periplasmic thioredoxin [Neisseria meningitidis] COG0526 Thiol-disulfide isomerase and thioredoxins                                                                                                                                                                                        | Cellular Processes                             |
| NGO0084 | 0.0127 | -5.14  | down | PglC\ Context:(NC_002946)-[90859-92034]\ Notes:Best Blastp Hit: pir     H81983 pilin glycosylation protein NMA0638 [imported] - Neisseria meningitidis (group A strain Z2491) >gi 7379371 emb CAB83928.1  (AL162753) pilin glycosylation protein [Neisseria meningitidis] COG0399 Predicted pyridoxal phosphate-dependent                                                                                         | Cellular Processes                             |
| NGO0104 | 0.0048 | -6.22  | down | O-sialoglycoprotein endopeptidase\ Context:(NC_002946)+[116169-117233]\ Notes:in most organisms; only the N-terminal domain is present in a single polypeptide; in some archaea this domain is fused to a kinase domain; this gene is essential for growth in Escherichia coli and Bacillus subtilis; the secreted glycoprotease from Pasteurella haemolytica showed specificity for O-sialoglycosylated proteins | Cellular Processes                             |
| NGO0139 | 0.0060 | -13.41 | down | putative endonuclease III\ Context:(NC_002946)-[147480-148109]\ Notes:Best Blastp Hit: pir     D81187 endonuclease III NMB0533 [imported] - Neisseria meningitidis (group B strain MD58) >gi 7225758 gb AAF40962.1  (AE002409) endonuclease III [Neisseria meningitidis MC58] COG0177 Predicted EndoIII-related endonuclease                                                                                      | Cellular Processes                             |
| NGO0365 | 0.0130 | -62.89 | down | site-specific DNA-methyltransferase M.NgoVII\ Context:(NC_002946)-[357319-358443]\ Notes:Best Blastp Hit: pir     T10165 site-specific DNA-methyltransferase (cytosine-specific) (EC 2.1.1.73) NgoVII - Neisseria gonorrhoeae >gi 1165245 gb AAA86270.1  (U43736) M.NgoVII [Neisseria gonorrhoeae] COG0270 Site-specific DNA methylase dcm                                                                        | Cellular Processes                             |
| NGO0545 | 0.0177 | -4.95  | down | putative type III restriction-modification system methyltransferase\ Context:(NC_002946)+[518016-520079]\ Notes:Best Blastp Hit: possibly phase variable - 13 tandem repeats of CCAAC in the coding sequence (ON) COG2189 Adenine specific DNA methylase Mod                                                                                                                                                      | Cellular Processes                             |
| NGO0655 | 0.0002 | -57.57 | down | exodeoxyribonuclease VII large subunit\ Context:(NC_002946)+[644189-645544]\ Notes:bidirectionally degrades single-stranded DNA into large acid-insoluble oligonucleotides                                                                                                                                                                                                                                        | Cellular Processes                             |

|         |        |        |      |                                                                                                                                                                                                                                                                                                                                                                                                                                                                               |                    |
|---------|--------|--------|------|-------------------------------------------------------------------------------------------------------------------------------------------------------------------------------------------------------------------------------------------------------------------------------------------------------------------------------------------------------------------------------------------------------------------------------------------------------------------------------|--------------------|
| NGO0711 | 0.0089 | -19.44 | down | putative alcohol dehydrogenase\ Context:(NC_002946)+[710377-711393]\ Notes:Best Blastp Hit: pir     C81088 alcohol dehydrogenase; zinc-containing NMB1395 [imported] - Neisseria meningitidis (group B strain MD58) >gi 7226634 gb AAF41759.1  (AE002488) alcohol dehydrogenase; zinc-containing [Neisseria meningitidis MC58] COG1065 Zn-dependent oxidoreductases                                                                                                           | Cellular Processes |
| NGO0804 | 0.0063 | -9.61  | down | hypothetical protein\ Context:(NC_002946)-[795859-796749]\ Notes:Best Blastp Hit: pir     C81906 hypothetical protein NMA1369 [imported] - Neisseria meningitidis (group A strain Z2491) >gi 7380037 emb CAB84615.1  (AL162755) hypothetical protein NMA1369 [Neisseria meningitidis] COG0063 Predicted sugar kinase                                                                                                                                                          | Cellular Processes |
| NGO0886 | 0.0092 | -32.72 | down | putative acyl-CoA dehydrogenase\ Context:(NC_002946)-[865857-866939]\ Notes:Best Blastp Hit: emb CAB84463.1  (AL162755) putative acyl-CoA dehydrogenase [Neisseria meningitidis] COG1960 Acyl-CoA dehydrogenases                                                                                                                                                                                                                                                              | Cellular Processes |
| NGO0893 | 0.0250 | -4.49  | down | putative oxidoreductase\ Context:(NC_002946)+[871108-874941]\ Notes:Best Blastp Hit: emb CAB84467.1  (AL162755) putative oxidoreductase [Neisseria meningitidis] COG0247 Fe-S oxidoreductases                                                                                                                                                                                                                                                                                 | Cellular Processes |
| NGO0960 | 0.0005 | -35.26 | down | hypothetical protein\ Context:(NC_002946)+[932839-933615]\ Notes:Best Blastp Hit: gb AAF41857.1  (AE002499) HesA/MoeB/ThiF family protein [Neisseria meningitidis MC58] COG1179 Dinucleotide-utilizing enzymes involved in                                                                                                                                                                                                                                                    | Cellular Processes |
| NGO1030 | 0.0100 | -3.25  | down | hypothetical protein\ Context:(NC_002946)-[994130-995053]\ Notes:Best Blastp Hit: gb AAF41818.1  (AE002495) conserved hypothetical protein [Neisseria meningitidis MC58] COG0697 Predicted permeases                                                                                                                                                                                                                                                                          | Cellular Processes |
| NGO1064 | 0.0296 | -3.13  | down | hypothetical protein\ Context:(NC_002946)+[1023468-1025549]\ Notes:Best Blastp Hit: pir     C81078 carbon starvation protein A homolog NMB1493 [similarity] - Neisseria meningitidis (group B strain MD58) >gi 7226734 gb AAF41849.1  (AE002498) carbon starvation protein A [Neisseria meningitidis MC58] COG1966 Carbon starvation protein CstA; predicted                                                                                                                  | Cellular Processes |
| NGO1246 | 0.0037 | -5.84  | down | putative periplasmic protease\ Context:(NC_002946)-[1197229-1198281]\ Notes:SohB; periplasmic protein; member of the peptidase S49 family                                                                                                                                                                                                                                                                                                                                     | Cellular Processes |
| NGO1292 | 0.0326 | -7.80  | down | Dsb\ Context:(NC_002946)-[1247601-1248089]\ Notes:Best Blastp Hit: gb AAF41998.1  (AE002515) disulfide bond formation protein B [Neisseria meningitidis MC58] COG1495 Disulfide bond formation protein DsbB; putative disulfide bond formation protein                                                                                                                                                                                                                        | Cellular Processes |
| NGO1403 | 0.0180 | -6.43  | down | glutamyl-tRNA reductase\ Context:(NC_002946)-[1368673-1369920]\ Notes:catalyzes the formation of glutamate-1-semialdehyde from glutamyl-tRNA(Glu) and NADPH; the second step of the pathway is catalyzed by glutamate-1-semialdehyde aminomutase which results in the formation of 5-aminolevulinic acid; functions in porphyrin (tetrapyrroles) biosynthesis; the crystal structure showed a C-terminal dimerization domain that appears to be absent in Chlamydial proteins | Cellular Processes |
| NGO1526 | 0.0093 | -18.43 | down | 2-methylisocitrate lyase\ Context:(NC_002946)-[1495930-1496808]\ Notes:catalyzes the formation of pyruvate and succinate from 2-methylisocitrate                                                                                                                                                                                                                                                                                                                              | Cellular Processes |
| NGO1583 | 0.0166 | -4.94  | down | anhydro-N-acetylmuramic acid kinase\ Context:(NC_002946)+[1558058-1559188]\ Notes:catalyzes hydrolysis of 1,6-anhydro bond of anyhydro-N-acetylmuramic acid (anhMurNAc) and phosphorylates anhMurNAc to produce N-acetyl-muramate-6-phosphate; involved in murein recycling                                                                                                                                                                                                   | Cellular Processes |

|         |        |        |      |                                                                                                                                                                                                                                                                                                                                                                                                                                                                                                                                                                                 |                    |
|---------|--------|--------|------|---------------------------------------------------------------------------------------------------------------------------------------------------------------------------------------------------------------------------------------------------------------------------------------------------------------------------------------------------------------------------------------------------------------------------------------------------------------------------------------------------------------------------------------------------------------------------------|--------------------|
| NGO1603 | 0.0044 | -7.05  | down | monofunctional peptidoglycan transglycosylase\ Context:(NC_002946)+[1574614-1575315]\ Notes:Best Blastp Hit: sp Q51005 MTGA_NEIGO monofunctional biosynthetic peptidoglycan transglycosylase (monofunctional TGASE) >gi 1196663 gb AAB37748.1  (L47159) peptidoglycan transglycosylase [Neisseria gonorrhoeae] >gi 1778807 gb AAC44899.1  (U82700) monofunctional peptidoglycan transglycosylase [Neisseria gonorrhoeae] COG0744 Membrane carboxypeptidase                                                                                                                      | Cellular Processes |
| NGO1682 | 0.0348 | -5.73  | down | efflux pump protein; fatty acid resistance\ Context:(NC_002946)-[1634104-1635627]\ Notes:Best Blastp Hit: gb AAD54074.1  (AF132910) efflux pump protein FarB [Neisseria gonorrhoeae] COG0477 Permeases                                                                                                                                                                                                                                                                                                                                                                          | Cellular Processes |
| NGO1726 | 0.0253 | -3.19  | down | hypothetical protein\ Context:(NC_002946)+[1687607-1688332]\ Notes:Best Blastp Hit: emb CAB85428.1  (AL162758) hypothetical protein [Neisseria meningitidis] COG1040 Predicted amidophosphoribosyl transferases                                                                                                                                                                                                                                                                                                                                                                 | Cellular Processes |
| NGO1758 | 0.0058 | -9.50  | down | GlnE\ Context:(NC_002946)-[1719259-1721949]\ Notes:Best Blastp Hit: pir E81994 probable [glutamate--ammonia-ligase] adenyltransferase (EC 2.7.7.42) NMA0035 [imported] - Neisseria meningitidis (group A strain Z2491) >gi 7378811 emb CAB83353.1  (AL162752) putative glutamate-ammonia-ligase adenyltransferase [Neisseria meningitidis] COG1391 Glutamine synthetase adenyltransferase                                                                                                                                                                                       | Cellular Processes |
| NGO1765 | 0.0502 | -2.87  | down | PglA\ Context:(NC_002946)+[1728025-1729155]\ Notes:Best Blastp Hit: possibly phase variable - 10G residue homopolymer repeat in the coding sequence (ON) COG0438 Glycosyltransferases I; putative glycosyltransferase                                                                                                                                                                                                                                                                                                                                                           | Cellular Processes |
| NGO1898 | 0.0337 | -3.86  | down | glucose-1-phosphate thymidyltransferase\ Context:(NC_002946)+[1866297-1867163]\ Notes:Best Blastp Hit: sp P37762 RFBA_NEIGO glucose-1-phosphate thymidyltransferase (DTDP-glucose synthase) (DTDP-glucose pyrophosphorylase) >gi 628591 pir S47046 glucose-1-phosphate thymidyltransferase (EC 2.7.7.24) - Neisseria gonorrhoeae >gi 520897 emb CAA83653.1  (Z32742) Glucose-1-phosphate thymidyltransferase [Neisseria gonorrhoeae] >gi 1333794 emb CAA79719.1  (Z21508) glucose-1-phosphate thymid transferase [Neisseria gonorrhoeae] COG1209 dTDP-glucose pyrophosphorylase | Cellular Processes |
| NGO2009 | 0.0212 | -9.65  | down | putative permease protein\ Context:(NC_002946)-[1979908-1981134]\ Notes:Best Blastp Hit: gb AAF42386.1  (AE002556) conserved hypothetical protein [Neisseria meningitidis MC58] COG1457 Purine-cytosine permease and related                                                                                                                                                                                                                                                                                                                                                    | Cellular Processes |
| NGO2016 | 0.0239 | -5.42  | down | hypothetical protein\ Context:(NC_002946)+[1987346-1988734]\ Notes:Best Blastp Hit: pir D81010 conserved hypothetical protein NMB2064 [imported] - Neisseria meningitidis (group B strain MD58) >gi 7227326 gb AAF42383.1  (AE002556) conserved hypothetical protein [Neisseria meningitidis MC58] COG2056 Predicted permease                                                                                                                                                                                                                                                   | Cellular Processes |
| NGO2055 | 0.0163 | -14.50 | down | putative hydrolase\ Context:(NC_002946)-[2029787-2030515]\ Notes:Best Blastp Hit: emb CAB83593.1  (AL162752) possible hydrolase [Neisseria meningitidis] COG1011 Predicted hydrolases of the HAD superfamily                                                                                                                                                                                                                                                                                                                                                                    | Cellular Processes |
| NGO2059 | 0.0050 | -13.07 | down | trifunctional thioredoxin/methionine sulfoxide reductase A/B protein\ Context:(NC_002946)-[2033109-2034677]\ Notes:this is a fusion of 3 domains; an N-terminal thioredoxin domain; and 2 domains at the C-terminus that are methionine sulfoxide reductases; MsrA and MsrB; methionine is modified to form methionine sulfoxide during normal cellular processes and due to oxidat                                                                                                                                                                                             | Cellular Processes |
| NGO2125 | 0.0055 | -10.98 | down | putative acetyltransferase\ Context:(NC_002946)-[2108308-2108826]\ Notes:Best Blastp Hit: emb CAB83787.1  (AL162753) putative acetyltransferase [Neisseria meningitidis] COG2171 Tetrahydrodipicolinate                                                                                                                                                                                                                                                                                                                                                                         | Cellular Processes |

|         |        |        |      |                                                                                                                                                                                                                                                                                                                                                                                                                                                            |                                 |
|---------|--------|--------|------|------------------------------------------------------------------------------------------------------------------------------------------------------------------------------------------------------------------------------------------------------------------------------------------------------------------------------------------------------------------------------------------------------------------------------------------------------------|---------------------------------|
| NGO0203 | 0.0223 | -2.74  | down | putative phosphatase\ Context:(NC_002946)-[206177-206887]\ Notes:Best Blastp Hit: gb AAF41046.1  (AE002417) phosphoglycolate phosphatase [Neisseria meningitidis MC58] COG0546<br>Predicted phosphatases                                                                                                                                                                                                                                                   | Central Intermediary Metabolism |
| NGO1668 | 0.0165 | -18.01 | down | glucose-6-phosphate isomerase\ Context:(NC_002946)-[1622324-1623967]\ Notes:Best Blastp Hit: pir   G81787 glucose-6-phosphate isomerase (EC 5.3.1.9) 2 NMA2154 [imported] - Neisseria meningitidis (group A strain Z2491) >gi 7380775 emb CAB85366.1  (AL162758) glucose-6-phosphate isomerase 2 [Neisseria meningitidis] COG0166 Glucose-6-phosphate isomerase                                                                                            | Central Intermediary Metabolism |
| NGO1776 | 0.0035 | -30.48 | down | glyceraldehyde-3-phosphate dehydrogenase\ Context:(NC_002946)+[1746835-1747866]\ Notes:catalyzes the formation of 3-phospho-D-glyceroyl phosphate from D-glyceraldehyde 3-phosphate                                                                                                                                                                                                                                                                        | Central Intermediary Metabolism |
| NGO2043 | 0.0200 | -2.71  | down | putative dehydrogenase related protein\ Context:(NC_002946)+[2017051-2017365]\ Notes:Best Blastp Hit: pir   F82022 probable glycerate dehydrogenase (EC 1.1.1.29) NMA0274 [imported] - Neisseria meningitidis (group A strain Z2491) >gi 7379036 emb CAB83582.1  (AL162752) putative glycerate dehydrogenase [Neisseria meningitidis] COG1052 Lactate dehydrogenase and related                                                                            | Central Intermediary Metabolism |
| NGO0308 | 0.0025 | -20.60 | down | putative adenosylmethionine-8-amino-7-oxononanoate aminotranferase\ Context:(NC_002946)+[307549-308850]\ Notes:Best Blastp Hit: pir   D81164 adenosylmethionine-8-amino-7-oxononanoate aminotransferase NMB0732 [imported] - Neisseria meningitidis (group B strain MD58) >gi 7225960 gb AAF41145.1  (AE002428) adenosylmethionine-8-amino-7-oxononanoate aminotransferase [Neisseria meningitidis MC58] COG0161 Adenosylmethionine-8-amino-7-oxononanoate | Co-Factor Metabolism            |
| NGO0309 | 0.0039 | -11.97 | down | dithiobiotin synthetase\ Context:(NC_002946)+[308847-309494]\ Notes:DTB synthetase; dethiobiotin synthase; involved in production of dethiobiotin from ATP and 7;8-diaminononanoate and carbon dioxide; contains magnesium                                                                                                                                                                                                                                 | Co-Factor Metabolism            |
| NGO0323 | 0.0125 | -6.67  | down | 2-amino-4-hydroxy-6-hydroxymethylhydropteridine-pyrophosphokinase\ Context:(NC_002946)-[321872-322366]\ Notes:Best Blastp Hit: H]COG08017; 8-dihydro-6-hydroxymethylpterin-pyrophosphokinase                                                                                                                                                                                                                                                               | Co-Factor Metabolism            |
| NGO0658 | 0.0023 | -6.44  | down | pyridoxamine 5'-phosphate oxidase\ Context:(NC_002946)+[648916-649548]\ Notes:catalyzes the formation of pyridoxal 5'-phosphate from pyridoxamine 5'-phosphate                                                                                                                                                                                                                                                                                             | Co-Factor Metabolism            |
| NGO0754 | 0.0154 | -6.32  | down | putative molybdopterin-guanine dinucleotide biosynthesis protein\ Context:(NC_002946)+[751362-751976]\ Notes:Best Blastp Hit: emb CAB84657.1  (AL162755) putative molybdopterin-guanine dinucleotide biosynthesis protein A [Neisseria meningitidis] COG0746 Molybdopterin-guanine dinucleotide                                                                                                                                                            | Co-Factor Metabolism            |
| NGO1725 | 0.0187 | -3.66  | down | putative bioH - biotin biosynthesis protein\ Context:(NC_002946)-[1686859-1687635]\ Notes:Best Blastp Hit: emb CAB85427.1  (AL162758) putative hydrolase [Neisseria meningitidis] COG0570 BioH; catalyzes some early step in biotin                                                                                                                                                                                                                        | Co-Factor Metabolism            |
| NGO0318 | 0.0194 | -2.59  | down | hypothetical protein\ Context:(NC_002946)+[315740-317413]\ Notes:Best Blastp Hit: pir   D81165 DNA repair protein RecN NMB0740 [imported] - Neisseria meningitidis (group B strain MD58) >gi 7225968 gb AAF41153.1  (AE002428) DNA repair protein RecN [Neisseria meningitidis MC58] COG0497 ATPases involved in DNA repair                                                                                                                                | DNA Repair                      |
| NGO0681 | 0.0333 | -9.55  | down | DNA repair protein RadC\ Context:(NC_002946)+[670461-671138]\ Notes:Involved in DNA double-strand break repair and recombination. Promotes the annealing of complementary single-stranded DNA and by simulation of RAD51 recombinase                                                                                                                                                                                                                       | DNA Repair                      |

|         |        |        |      |                                                                                                                                                                                                                                                                                                                                                                                                                                                               |                   |
|---------|--------|--------|------|---------------------------------------------------------------------------------------------------------------------------------------------------------------------------------------------------------------------------------------------------------------------------------------------------------------------------------------------------------------------------------------------------------------------------------------------------------------|-------------------|
| NGO0738 | 0.0358 | -5.08  | down | putative DNA-damage-inducible protein\ Context:(NC_002946)+[733057-734115]\ Notes:Best Blastp Hit: emb CAB72023.1  (AJ391259) putative DNA-damage inducible protein P [Neisseria meningitidis] >gi 7380303 emb CAB84889.1  (AL162756) impB/mucB/samB family protein [Neisseria meningitidis] COG0389 Nucleotidyltransferase/DNA polymerase                                                                                                                    | DNA Repair        |
| NGO0786 | 0.0201 | -3.84  | down | uracil-DNA glycosylase\ Context:(NC_002946)-[778867-779526]\ Notes:Excises uracil residues from the DNA which can arise as a result of misincorporation of dUMP residues by DNA polymerase or due to deamination of cytosine                                                                                                                                                                                                                                  | DNA Repair        |
| NGO1173 | 0.0436 | -11.28 | down | putative DNA mismatch endonuclease; patch repair protein\ Context:(NC_002946)-[1110897-1111319]\ Notes:Best Blastp Hit: pir H81959 patch repair protein (EC 3.1.-.-) NMA0429 [imported] - Neisseria meningitidis (group A strain Z2491) >gi 7379179 emb CAB83728.1  (AL162753) patch repair protein [Neisseria meningitidis]                                                                                                                                  | DNA Repair        |
| NGO0485 | 0.0490 | -7.16  | down | putative replicative DNA helicase; putative phage associated protein\ Context:(NC_002946)+[467039-468400]\ Notes:Best Blastp Hit: sp P37469 DNAC_BACSU replicative DNA helicase >gi 2127189 pir  S65970 replicative DNA helicase dnaC - Bacillus subtilis >gi 467330 dbj BAA05176.1  (D26185) replicative DNA helicase [Bacillus subtilis] >gi 2636591 emb CAB16081.1  (Z99124) replicative DNA helicase [Bacillus subtilis] COG0305 Replicative DNA helicase | DNA Replication   |
| NGO0696 | 0.0138 | -3.34  | down | recombination factor protein RarA\ Context:(NC_002946)+[688651-689961]\ Notes:Best Blastp Hit: pir E81103 conserved hypothetical protein NMB1258 [imported] - Neisseria meningitidis (group B strain MD58) >gi 7226497 gb AAF41636.1  (AE002474) conserved hypothetical protein [Neisseria meningitidis MC58] COG2256 Uncharacterized ATPase related to the                                                                                                   | DNA Replication   |
| NGO1259 | 0.0009 | -7.52  | down | DNA topoisomerase IV subunit A\ Context:(NC_002946)+[1210524-1212827]\ Notes:decatenates newly replicated chromosomal DNA and relaxes positive and negative DNA supercoiling                                                                                                                                                                                                                                                                                  | DNA Replication   |
| NGO1437 | 0.0006 | -33.03 | down | primosome assembly protein PriA\ Context:(NC_002946)-[1399954-1402143]\ Notes:binding of PriA to forked DNA starts the assembly of the primosome; also possesses 3'-5' helicase activity                                                                                                                                                                                                                                                                      | DNA Replication   |
| NGO2034 | 0.0202 | -8.96  | down | DNA ligase\ Context:(NC_002946)+[2004672-2005496]\ Notes:catalyzes the formation of a phosphodiester at the site of a single-strand break in duplex DNA                                                                                                                                                                                                                                                                                                       | DNA Replication   |
| NGO0059 | 0.0006 | -6.19  | down | putative flavoprotein oxidoreductase\ Context:(NC_002946)+[59981-60481]\ Notes:Best Blastp Hit: pir B81981 probable 4-hydroxyphenylacetate 3-monooxygenase (EC 1.14.13.3) small chain NMA0614 [similarity] - Neisseria meningitidis (group A strain Z2491) >gi 7379349 emb CAB83904.1  (AL162753) putative NADH:FMN oxidoreductase [Neisseria meningitidis] COG1853 Conserved protein/domain typically                                                        | Energy Metabolism |
| NGO0102 | 0.0081 | -3.11  | down | putative cytochrome biogenesis protein\ Context:(NC_002946)+[112858-114873]\ Notes:Best Blastp Hit: pir E81040 cytochrome c-type biogenesis protein; probable NMB1804 [imported] - Neisseria meningitidis (group B strain MD58) >gi 7227058 gb AAF42141.1  (AE002530) cytochrome c-type biogenesis protein; putative [Neisseria meningitidis MC58] COG1333 ResB protein required for cytochrome c                                                             | Energy Metabolism |
| NGO0103 | 0.0345 | -7.32  | down | putative cytochrome synthesis protein\ Context:(NC_002946)+[114866-116053]\ Notes:Best Blastp Hit: emb CAB83947.1  (AL162753) putative membrane protein [Neisseria meningitidis] COG0755 Cytochrome c biogenesis factors; CcmC                                                                                                                                                                                                                                | Energy Metabolism |
| NGO0600 | 0.0001 | -31.89 | down | putative esterase D\ Context:(NC_002946)-[586297-587043]\ Notes:Best Blastp Hit: pir G81097 esterase; probable NMB1305 [imported] - Neisseria meningitidis (group B strain MD58) >gi 7226546 gb AAF41680.1  (AE002479) esterase; putative [Neisseria meningitidis MC58] COG0627 Predicted esterase                                                                                                                                                            | Energy Metabolism |
| NGO1080 | 0.0489 | -4.92  | down | putative C-type cytochrome\ Context:(NC_002946)+[1038226-1038684]\ Notes:Best Blastp Hit: emb CAB84381.1  (AL162755) putative C-type cytochrome [Neisseria meningitidis]                                                                                                                                                                                                                                                                                      | Energy Metabolism |

|         |        |         |      |                                                                                                                                                                                                                                                                                                                                                                            |                   |
|---------|--------|---------|------|----------------------------------------------------------------------------------------------------------------------------------------------------------------------------------------------------------------------------------------------------------------------------------------------------------------------------------------------------------------------------|-------------------|
| NGO1184 | 0.0088 | -8.04   | down | hypothetical protein\ Context:(NC_002946)-[1128345-1129463]\ Notes:Best Blastp Hit: pir     G75287 NADH oxidase-related protein - Deinococcus radiodurans (strain R1) >gi 6460144 gb AAF11879.1 AE002064_10 (AE002064) NADH oxidase-related protein [Deinococcus radiodurans] COG1902 NADH:flavin oxidoreductases; Old Yellow                                              | Energy Metabolism |
| NGO1328 | 0.0263 | -4.26   | down | putative cytochrome\ Context:(NC_002946)-[1286026-1286865]\ Notes:Best Blastp Hit: gb AAF42025.1  (AE002518) cytochrome c5 [Neisseria meningitidis MC58]                                                                                                                                                                                                                   | Energy Metabolism |
| NGO1737 | 0.0080 | -6.02   | down | NADH dehydrogenase subunit N\ Context:(NC_002946)-[1695421-1696866]\ Notes:Catalyzes the transfer of electrons from NADH to ubiquinone                                                                                                                                                                                                                                     | Energy Metabolism |
| NGO1738 | 0.0136 | -4.87   | down | NADH dehydrogenase subunit M\ Context:(NC_002946)-[1696876-1698372]\ Notes:Catalyzes the transfer of electrons from NADH to ubiquinone                                                                                                                                                                                                                                     | Energy Metabolism |
| NGO1741 | 0.0010 | -17.77  | down | NADH dehydrogenase subunit K\ Context:(NC_002946)-[1701860-1702165]\ Notes:Catalyzes the transfer of electrons from NADH to ubiquinone                                                                                                                                                                                                                                     | Energy Metabolism |
| NGO1742 | 0.0005 | -54.37  | down | hypothetical protein\ Context:(NC_002946)-[1702162-1702833]\ Notes:Best Blastp Hit: gb AAF40707.1  (AE002382) NADH dehydrogenase I; J subunit [Neisseria meningitidis MC58]                                                                                                                                                                                                | Energy Metabolism |
| NGO1744 | 0.0352 | -12.94  | down | hypothetical protein\ Context:(NC_002946)-[1703405-1704481]\ Notes:Best Blastp Hit: pir     E81219 NADH dehydrogenase I; H chain NMB0250 [imported] - Neisseria meningitidis (group B strain MD58) >gi 7225473 gb AAF40704.1  (AE002382) NADH dehydrogenase I; H subunit [Neisseria meningitidis MC58] COG1005 NADH-ubiquinone oxidoreductase subunit 1                    | Energy Metabolism |
| NGO1745 | 0.0006 | -5.87   | down | NADH dehydrogenase subunit G\ Context:(NC_002946)-[1704484-1706745]\ Notes:Catalyzes the transfer of electrons from NADH to ubiquinone                                                                                                                                                                                                                                     | Energy Metabolism |
| NGO1746 | 0.0480 | -3.77   | down | hypothetical protein\ Context:(NC_002946)-[1707458-1708759]\ Notes:Best Blastp Hit: pir     D81222 NADH dehydrogenase I; F chain NMB0246 [imported] - Neisseria meningitidis (group B strain MD58) >gi 7225468 gb AAF40700.1  (AE002381) NADH dehydrogenase I; F subunit [Neisseria meningitidis MC58] COG1894 NADH-ubiquinone oxidoreductase; NADH-binding                | Energy Metabolism |
| NGO1747 | 0.0018 | -27.64  | down | NADH dehydrogenase subunit E\ Context:(NC_002946)-[1709149-1709622]\ Notes:Catalyzes the transfer of electrons from NADH to ubiquinone                                                                                                                                                                                                                                     | Energy Metabolism |
| NGO1748 | 0.0006 | -18.61  | down | NADH dehydrogenase subunit D\ Context:(NC_002946)-[1709622-1710878]\ Notes:Catalyzes the transfer of electrons from NADH to ubiquinone                                                                                                                                                                                                                                     | Energy Metabolism |
| NGO1749 | 0.0007 | -39.62  | down | NADH dehydrogenase subunit C\ Context:(NC_002946)-[1710868-1711461]\ Notes:Catalyzes the transfer of electrons from NADH to ubiquinone                                                                                                                                                                                                                                     | Energy Metabolism |
| NGO1750 | 0.0000 | -393.27 | down | NADH dehydrogenase subunit B\ Context:(NC_002946)-[1711474-1711956]\ Notes:The point of entry for the majority of electrons that traverse the respiratory chain eventually resulting in the reduction of oxygen                                                                                                                                                            | Energy Metabolism |
| NGO1751 | 0.0000 | -53.97  | down | hypothetical protein\ Context:(NC_002946)-[1711947-1712303]\ Notes:Best Blastp Hit: pir     G81992 NADH dehydrogenase (ubiquinone) (EC 1.6.5.3) I chain A NMA0019 [imported] - Neisseria meningitidis (group A strain Z2491) >gi 7378797 emb CAB83339.1  (AL162752) NADH dehydrogenase I chain A [Neisseria meningitidis] COG0838 NADH-ubiquinone oxidoreductase subunit 3 | Energy Metabolism |
| NGO1769 | 0.0160 | -22.14  | down | CcpR\ Context:(NC_002946)+[1733575-1734738]\ Notes:Best Blastp Hit: pir     B70313 cytochrome-c peroxidase (EC 1.11.1.5) - Aquifex aeolicus >gi 2982865 gb AAC06485.1  (AE000675) cytochrome c peroxidase [Aquifex aeolicus] COG1858 Cytochrome c peroxidase; putative cytochrome-c peroxidase                                                                             | Energy Metabolism |

|         |        |        |      |                                                                                                                                                                                                                                                                                                                                                                                                                                                             |                      |
|---------|--------|--------|------|-------------------------------------------------------------------------------------------------------------------------------------------------------------------------------------------------------------------------------------------------------------------------------------------------------------------------------------------------------------------------------------------------------------------------------------------------------------|----------------------|
| NGO2079 | 0.0014 | -13.70 | down | putative carbonic anhydrase\ Context:(NC_002946)+[2058947-2059546]\ Notes:Best Blastp Hit: pir     D81015 conserved hypothetical protein NMB2025 [imported] - Neisseria meningitidis (group B strain MD58; group A strain Z2491) >gi 7227287 gb AAF42348.1  (AE002552) conserved hypothetical protein [Neisseria meningitidis MC58] >gi 7379165 emb CAB83714.1  (AL162753) hypothetical protein NMA0415 [Neisseria meningitidis] COG0288 Carbonic anhydrase | Energy Metabolism    |
| NGO0009 | 0.0476 | -4.50  | down | hypothetical protein\ Context:(NC_002946)+[11091-11546]\ Notes:Best Blastp Hit: sp P54298 LUXM_VIBHA LUXM protein >gi 487037 pir     S37349 luxM protein - Vibrio harveyi >gi 295433 gb AAC36807.1  (L13940) Lux M [Vibrio harveyi]                                                                                                                                                                                                                         | Hypothetical Protein |
| NGO0010 | 0.0273 | -3.09  | down | hypothetical protein\ Context:(NC_002946)-[12107-12307]\ Notes:Best Blastp Hit: gb AAF42226.1  (AE002539) hypothetical protein [Neisseria meningitidis MC58]                                                                                                                                                                                                                                                                                                | Hypothetical Protein |
| NGO0033 | 0.0201 | -15.38 | down | hypothetical protein\ Context:(NC_002946)-[28996-29853]\ Notes:Best Blastp Hit: pir     D81032 hypothetical protein NMB1870 [imported] - Neisseria meningitidis (group B strain MD58) >gi 7227128 gb AAF42204.1  (AE002537) hypothetical protein [Neisseria meningitidis MC58]                                                                                                                                                                              | Hypothetical Protein |
| NGO0076 | 0.0240 | -14.83 | down | hypothetical protein\ Context:(NC_002946)+[80406-80726]\ Notes:Best Blastp Hit: gb AAF42163.1  (AE002532) conserved hypothetical protein [Neisseria meningitidis MC58]                                                                                                                                                                                                                                                                                      | Hypothetical Protein |
| NGO0109 | 0.0427 | -9.37  | down | hypothetical protein\ Context:(NC_002946)+[121880-122068]\ Notes:                                                                                                                                                                                                                                                                                                                                                                                           | Hypothetical Protein |
| NGO0115 | 0.0532 | -12.69 | down | hypothetical protein\ Context:(NC_002946)-[127801-128310]\ Notes:Best Blastp Hit: sp P15041 YZSB_ECOLI very hypothetical 17.7 kD protein in SecB region>gi 76221 pir     QQEC17 hypothetical 17.7K protein (secB region) - Escherichia coli >gi 1128972 gb AAA83908.1  (M24489) ORF; putative [Escherichia coli]                                                                                                                                            | Hypothetical Protein |
| NGO0120 | 0.0115 | -20.23 | down | hypothetical protein\ Context:(NC_002946)+[132347-132475]\ Notes:                                                                                                                                                                                                                                                                                                                                                                                           | Hypothetical Protein |
| NGO0121 | 0.0003 | -50.71 | down | hypothetical protein\ Context:(NC_002946)+[132575-133729]\ Notes:Best Blastp Hit: gb AAF42125.1  (AE002528) hypothetical protein [Neisseria meningitidis MC58]                                                                                                                                                                                                                                                                                              | Hypothetical Protein |
| NGO0141 | 0.0007 | -80.65 | down | hypothetical protein\ Context:(NC_002946)+[148719-148865]\ Notes:                                                                                                                                                                                                                                                                                                                                                                                           | Hypothetical Protein |
| NGO0166 | 0.0031 | -23.40 | down | hypothetical protein\ Context:(NC_002946)-[170109-170975]\ Notes:Best Blastp Hit: pir     A81874 probable periplasmic protein NMA1084 [imported] - Neisseria meningitidis (group A strain Z2491) >gi 7379779 emb CAB84347.1  (AL162755) putative periplasmic protein [Neisseria meningitidis]                                                                                                                                                               | Hypothetical Protein |
| NGO0204 | 0.0307 | -16.97 | down | hypothetical protein\ Context:(NC_002946)-[206877-207704]\ Notes:Best Blastp Hit: pir     B81178 conserved hypothetical protein NMB0621 [imported] - Neisseria meningitidis (group B strain MD58) >gi 7225851 gb AAF41047.1  (AE002417) conserved hypothetical protein [Neisseria meningitidis MC58]                                                                                                                                                        | Hypothetical Protein |
| NGO0247 | 0.0055 | -3.36  | down | hypothetical protein\ Context:(NC_002946)+[248228-248392]\ Notes:Best Blastp Hit: emb CAB84157.1  (AL162754) hypothetical protein NMA0877 [Neisseria meningitidis]                                                                                                                                                                                                                                                                                          | Hypothetical Protein |
| NGO0285 | 0.0061 | -6.53  | down | hypothetical protein\ Context:(NC_002946)+[286106-286672]\ Notes:Best Blastp Hit: gb AAF62318.1  (AE002425) hypothetical protein [Neisseria meningitidis MC58]                                                                                                                                                                                                                                                                                              | Hypothetical Protein |
| NGO0324 | 0.0050 | -6.08  | down | hypothetical protein\ Context:(NC_002946)-[322376-322750]\ Notes:Best Blastp Hit: pir     A81163 conserved hypothetical protein NMB0746 [imported] - Neisseria meningitidis (group B strain MD58) >gi 7225975 gb AAF41159.1  (AE002429) conserved hypothetical protein [Neisseria meningitidis MC58]                                                                                                                                                        | Hypothetical Protein |
| NGO0336 | 0.0252 | -2.92  | down | hypothetical protein\ Context:(NC_002946)-[331995-332663]\ Notes:Best Blastp Hit: pir     D81161 conserved hypothetical protein NMB0759 [imported] - Neisseria meningitidis (group B strain MD58) >gi 7225989 gb AAF41172.1  (AE002430) conserved hypothetical protein [Neisseria meningitidis MC58]                                                                                                                                                        | Hypothetical Protein |
| NGO0339 | 0.0341 | -2.48  | down | hypothetical protein\ Context:(NC_002946)+[333959-334564]\ Notes:Best Blastp Hit: possibly phase variable - 8T residue homopolymer repeat in the coding sequence (ON)                                                                                                                                                                                                                                                                                       | Hypothetical Protein |



|         |        |        |      |                                                                                                                                                                                                                                                                                             |                      |
|---------|--------|--------|------|---------------------------------------------------------------------------------------------------------------------------------------------------------------------------------------------------------------------------------------------------------------------------------------------|----------------------|
| NGO0428 | 0.0002 | -16.80 | down | hypothetical protein\ Context:(NC_002946)-[423520-423744]\ Notes:Best Blastp Hit: emb CAB84342.1  (AL162755) hypothetical protein NMA1079 [Neisseria meningitidis]                                                                                                                          | Hypothetical Protein |
| NGO0429 | 0.0209 | -25.47 | down | hypothetical protein\ Context:(NC_002946)-[423973-424110]\ Notes:Best Blastp Hit: emb CAB84343.1  (AL162755) hypothetical protein NMA1080 [Neisseria meningitidis]                                                                                                                          | Hypothetical Protein |
| NGO0432 | 0.0310 | -5.30  | down | hypothetical protein\ Context:(NC_002946)-[426078-426620]\ Notes:Best Blastp Hit: pir   A81874 probable periplasmic protein NMA1084 [imported] - Neisseria meningitidis (group A strain Z2491) >gi 7379779 emb CAB84347.1  (AL162755) putative periplasmic protein [Neisseria meningitidis] | Hypothetical Protein |
| NGO0511 | 0.0117 | -10.90 | down | hypothetical protein\ Context:(NC_002946)+[489283-489588]\ Notes:                                                                                                                                                                                                                           | Hypothetical Protein |
| NGO0533 | 0.0478 | -7.21  | down | hypothetical protein\ Context:(NC_002946)-[506719-507702]\ Notes:Best Blastp Hit: pir   A81839 probable periplasmic protein NMA1479 [imported] - Neisseria meningitidis (group A strain Z2491) >gi 7380127 emb CAB84712.1  (AL162756) putative periplasmic protein [Neisseria meningitidis] | Hypothetical Protein |
| NGO0613 | 0.0020 | -8.69  | down | hypothetical protein\ Context:(NC_002946)-[599470-599781]\ Notes:Best Blastp Hit: pir   H81098 hypothetical protein NMB1293 [imported] - Neisseria meningitidis (group B strain MD58) >gi 7226534 gb AAF41669.1  (AE002478) hypothetical protein [Neisseria meningitidis MC58]              | Hypothetical Protein |
| NGO0631 | 0.0064 | -37.39 | down | hypothetical protein\ Context:(NC_002946)+[621689-621838]\ Notes:                                                                                                                                                                                                                           | Hypothetical Protein |
| NGO0638 | 0.0138 | -27.09 | down | hypothetical protein\ Context:(NC_002946)+[625640-625870]\ Notes:                                                                                                                                                                                                                           | Hypothetical Protein |
| NGO0647 | 0.0003 | -18.55 | down | hypothetical protein\ Context:(NC_002946)+[637578-638078]\ Notes:Best Blastp Hit: pir   G81090 hypothetical protein NMB1370 [imported] - Neisseria meningitidis (group B strain MD58) >gi 7226616 gb AAF41744.1  (AE002485) hypothetical protein [Neisseria meningitidis MC58]              | Hypothetical Protein |
| NGO0653 | 0.0060 | -12.21 | down | hypothetical protein\ Context:(NC_002946)+[642627-643100]\ Notes:Best Blastp Hit: pir   D81850 hypothetical protein NMA1577 [imported] - Neisseria meningitidis (group A strain Z2491) >gi 7380218 emb CAB84804.1  (AL162756) hypothetical protein [Neisseria meningitidis]                 | Hypothetical Protein |
| NGO0667 | 0.0044 | -24.83 | down | hypothetical protein\ Context:(NC_002946)-[657753-657938]\ Notes:                                                                                                                                                                                                                           | Hypothetical Protein |
| NGO0672 | 0.0434 | -15.69 | down | hypothetical protein\ Context:(NC_002946)+[662118-662309]\ Notes:                                                                                                                                                                                                                           | Hypothetical Protein |
| NGO0709 | 0.0119 | -35.36 | down | hypothetical protein\ Context:(NC_002946)+[708430-708798]\ Notes:                                                                                                                                                                                                                           | Hypothetical Protein |
| NGO0751 | 0.0328 | -4.22  | down | hypothetical protein\ Context:(NC_002946)+[747669-748577]\ Notes:Best Blastp Hit: emb CAC03614.1  (AJ272538) hypothetical protein [Kluyvera ascorbata]                                                                                                                                      | Hypothetical Protein |
| NGO0761 | 0.0265 | -5.45  | down | hypothetical protein\ Context:(NC_002946)-[756266-756574]\ Notes:Best Blastp Hit: pir   G81105 hypothetical protein NMB1242 [imported] - Neisseria meningitidis (group B strain MD58) >gi 7226482 gb AAF41623.1  (AE002472) hypothetical protein [Neisseria meningitidis MC58]              | Hypothetical Protein |
| NGO0762 | 0.0445 | -3.11  | down | hypothetical protein\ Context:(NC_002946)+[756606-756746]\ Notes:                                                                                                                                                                                                                           | Hypothetical Protein |
| NGO0789 | 0.0016 | -21.71 | down | hypothetical protein\ Context:(NC_002946)-[781083-782153]\ Notes:Best Blastp Hit: gb AAF41601.1  (AE002470) transporter; putative [Neisseria meningitidis MC58] COG0628 Predicted permease                                                                                                  | Hypothetical Protein |
| NGO0796 | 0.0303 | -12.26 | down | hypothetical protein\ Context:(NC_002946)-[785742-786314]\ Notes:Best Blastp Hit: possibly phase variable - 8A residue homopolymer repeat in the coding sequence (ON)                                                                                                                       | Hypothetical Protein |

|         |        |         |      |                                                                                                                                                                                                                                                                                                                                                                                                                                                                                          |                      |
|---------|--------|---------|------|------------------------------------------------------------------------------------------------------------------------------------------------------------------------------------------------------------------------------------------------------------------------------------------------------------------------------------------------------------------------------------------------------------------------------------------------------------------------------------------|----------------------|
| NGO0805 | 0.0008 | -20.93  | down | hypothetical protein\ Context:(NC_002946)+[796889-797470]\ Notes:Best Blastp Hit: pir    F81111 nickel-dependent hydrogenase; b-type cytochrome chain NMB1196; NMB1158 [imported] - Neisseria meningitidis (group B strain MD58) >gi 7226395 gb AAF41544.1  (AE002464) nickel-dependent hydrogenase; b-type cytochrome subunit [Neisseria meningitidis MC58] >gi 7226433 gb AAF41579.1  (AE002467) nickel-dependent hydrogenase; b-type cytochrome subunit [Neisseria meningitidis MC58] | Hypothetical Protein |
| NGO0812 | 0.0038 | -5.36   | down | hypothetical protein\ Context:(NC_002946)+[805132-805749]\ Notes:Best Blastp Hit: pir    B81117 hypothetical protein NMB1147; NMB1185 [imported] - Neisseria meningitidis (group B strain MD58) >gi 7226384 gb AAF41534.1  (AE002463) hypothetical protein [Neisseria meningitidis MC58] >gi 7226422 gb AAF41569.1  (AE002466) hypothetical protein [Neisseria meningitidis MC58]                                                                                                        | Hypothetical Protein |
| NGO0843 | 0.0001 | -165.28 | down | hypothetical protein\ Context:(NC_002946)-[827290-827577]\ Notes:                                                                                                                                                                                                                                                                                                                                                                                                                        | Hypothetical Protein |
| NGO0852 | 0.0063 | -5.27   | down | hypothetical protein\ Context:(NC_002946)+[839467-840147]\ Notes:Best Blastp Hit: pir    G81894 probable integral membrane protein NMA1265 [imported] - Neisseria meningitidis (group A strain Z2491) >gi 7379945 emb CAB84520.1  (AL162755) putative integral membrane protein [Neisseria meningitidis]                                                                                                                                                                                 | Hypothetical Protein |
| NGO0858 | 0.0073 | -8.15   | down | hypothetical protein\ Context:(NC_002946)+[842123-842725]\ Notes:Best Blastp Hit: possibly phase variable - 8A residue homopolymer repeat in the coding sequence (ON) COG0344 Predicted membrane protein; YgiH/UPF0078                                                                                                                                                                                                                                                                   | Hypothetical Protein |
| NGO0859 | 0.0020 | -26.41  | down | hypothetical protein\ Context:(NC_002946)+[842817-843662]\ Notes:Best Blastp Hit: pir    G81126 conserved hypothetical protein NMB1061 [imported] - Neisseria meningitidis (group B strain MD58) >gi 7226300 gb AAF41457.1  (AE002456) conserved hypothetical protein [Neisseria meningitidis MC58]                                                                                                                                                                                      | Hypothetical Protein |
| NGO0860 | 0.0241 | -10.96  | down | hypothetical protein\ Context:(NC_002946)+[843668-844126]\ Notes:                                                                                                                                                                                                                                                                                                                                                                                                                        | Hypothetical Protein |
| NGO0871 | 0.0018 | -12.05  | down | hypothetical protein\ Context:(NC_002946)+[855029-855358]\ Notes:Best Blastp Hit: emb CAB45013.1  (AJ242839) hypothetical protein [Neisseria gonorrhoeae]                                                                                                                                                                                                                                                                                                                                | Hypothetical Protein |
| NGO0879 | 0.0274 | -3.39   | down | hypothetical protein\ Context:(NC_002946)-[861993-862184]\ Notes:                                                                                                                                                                                                                                                                                                                                                                                                                        | Hypothetical Protein |
| NGO0880 | 0.0028 | -5.24   | down | hypothetical protein\ Context:(NC_002946)+[862282-862887]\ Notes:Best Blastp Hit: pir    B81892 hypothetical protein NMA1237 [imported] - Neisseria meningitidis (group A strain Z2491) >gi 7379924 emb CAB84495.1  (AL162755) hypothetical protein NMA1237 [Neisseria meningitidis]                                                                                                                                                                                                     | Hypothetical Protein |
| NGO0888 | 0.0029 | -5.62   | down | hypothetical protein\ Context:(NC_002946)-[867765-868025]\ Notes:Best Blastp Hit: gb AAF41399.1  (AE002450) hypothetical protein [Neisseria meningitidis MC58] >gi 7379895 emb CAB84465.1  (AL162755) hypothetical protein NMA1204 [Neisseria meningitidis]                                                                                                                                                                                                                              | Hypothetical Protein |
| NGO0892 | 0.0002 | -53.52  | down | hypothetical protein\ Context:(NC_002946)+[870645-870926]\ Notes:                                                                                                                                                                                                                                                                                                                                                                                                                        | Hypothetical Protein |
| NGO0894 | 0.0426 | -11.95  | down | hypothetical protein\ Context:(NC_002946)+[875018-876019]\ Notes:Best Blastp Hit: pir    H81888 hypothetical protein NMA1207 [imported] - Neisseria meningitidis (group A strain Z2491) >gi 7379898 emb CAB84468.1  (AL162755) hypothetical protein NMA1207 [Neisseria meningitidis] COG0042 Predicted TIM-barrel enzymes; possibly                                                                                                                                                      | Hypothetical Protein |
| NGO0905 | 0.0477 | -2.49   | down | hypothetical protein\ Context:(NC_002946)+[885235-885936]\ Notes:Best Blastp Hit: emb CAB84877.1  (AL162756) conserved hypothetical protein [Neisseria meningitidis] COG1556 Uncharacterized ACR; YkgG family                                                                                                                                                                                                                                                                            | Hypothetical Protein |

|         |        |        |      |                                                                                                                                                                                                                                                                                                                                                                                                                          |                      |
|---------|--------|--------|------|--------------------------------------------------------------------------------------------------------------------------------------------------------------------------------------------------------------------------------------------------------------------------------------------------------------------------------------------------------------------------------------------------------------------------|----------------------|
| NGO0906 | 0.0460 | -2.05  | down | hypothetical protein\ Context:(NC_002946)+[885933-887387]\ Notes:Best Blastp Hit: pir    F81859 conserved hypothetical iron-sulfur protein NMA1650 [similarity] - Neisseria meningitidis (group A strain Z2491) >gi 7380292 emb CAB84878.1  (AL162756) conserved hypothetical iron-sulphur protein [Neisseria meningitidis] COG1139 Uncharacterized conserved protein containing                                         | Hypothetical Protein |
| NGO0924 | 0.0330 | -15.17 | down | hypothetical protein\ Context:(NC_002946)-[904199-904408]\ Notes:                                                                                                                                                                                                                                                                                                                                                        | Hypothetical Protein |
| NGO0942 | 0.0154 | -14.22 | down | hypothetical protein\ Context:(NC_002946)+[918324-918812]\ Notes:Best Blastp Hit: gb AAF41339.1  (AE002444) conserved hypothetical protein [Neisseria meningitidis MC58]                                                                                                                                                                                                                                                 | Hypothetical Protein |
| NGO0953 | 0.0185 | -6.88  | down | hypothetical protein\ Context:(NC_002946)+[928934-929149]\ Notes:                                                                                                                                                                                                                                                                                                                                                        | Hypothetical Protein |
| NGO0969 | 0.0396 | -4.34  | down | hypothetical protein\ Context:(NC_002946)-[941107-941808]\ Notes:Best Blastp Hit: gb AAF41866.1  (AE002500) thermonuclease family protein [Neisseria meningitidis MC58] >gi 7380351 emb CAB84938.1  (AL162756) putative nuclease [Neisseria meningitidis] COG1525 Micrococcal nuclease (thermonuclease)                                                                                                                  | Hypothetical Protein |
| NGO0992 | 0.0449 | -2.69  | down | hypothetical protein\ Context:(NC_002946)-[963369-963989]\ Notes:Best Blastp Hit: pir    G81071 conserved hypothetical protein NMB1531 [imported] - Neisseria meningitidis (group B strain MD58; group A strain Z2491) >gi 7226776 gb AAF41886.1  (AE002503) conserved hypothetical protein [Neisseria meningitidis MC58] >gi 7380373 emb CAB84959.1  (AL162757) conserved hypothetical protein [Neisseria meningitidis] | Hypothetical Protein |
| NGO1033 | 0.0276 | -4.18  | down | putative transglycosylase\ Context:(NC_002946)-[997448-998071]\ Notes:Best Blastp Hit: pir    C81080 transglycosylase; probable NMB1462 [imported] - Neisseria meningitidis (group B strain MD58) >gi 7226704 gb AAF41821.1  (AE002496) transglycosylase; putative [Neisseria meningitidis MC58] COG0741 Soluble lytic murein transglycosylase and                                                                       | Hypothetical Protein |
| NGO1034 | 0.0342 | -8.49  | down | hypothetical protein\ Context:(NC_002946)+[998126-998470]\ Notes:Best Blastp Hit: gb AAF42457.1  (AE002563) hypothetical protein [Neisseria meningitidis MC58]                                                                                                                                                                                                                                                           | Hypothetical Protein |
| NGO1037 | 0.0255 | -6.02  | down | hypothetical protein\ Context:(NC_002946)-[999363-999746]\ Notes:                                                                                                                                                                                                                                                                                                                                                        | Hypothetical Protein |
| NGO1065 | 0.0508 | -2.31  | down | hypothetical protein\ Context:(NC_002946)+[1025539-1025733]\ Notes:Best Blastp Hit: gb AAF41850.1  (AE002498) conserved hypothetical protein [Neisseria meningitidis MC58] >gi 7380340 emb CAB84927.1  (AL162756) conserved hypothetical protein [Neisseria meningitidis]                                                                                                                                                | Hypothetical Protein |
| NGO1083 | 0.0356 | -5.01  | down | hypothetical protein\ Context:(NC_002946)+[1042858-1043178]\ Notes:                                                                                                                                                                                                                                                                                                                                                      | Hypothetical Protein |
| NGO1192 | 0.0234 | -3.58  | down | hypothetical protein\ Context:(NC_002946)+[1134874-1135218]\ Notes:Best Blastp Hit: pir    H81960 hypothetical inner membrane protein NMA0437 [imported] - Neisseria meningitidis (group A strain Z2491) >gi 7379187 emb CAB83736.1  (AL162753) hypothetical inner membrane protein [Neisseria meningitidis] COG1380 Predicted membrane protein; YohJ family                                                             | Hypothetical Protein |
| NGO1198 | 0.0322 | -5.53  | down | hypothetical protein\ Context:(NC_002946)+[1142045-1143619]\ Notes:Best Blastp Hit: gb AAF42335.1  (AE002550) YhbX/YhjW/YijP/YjdB family protein [Neisseria meningitidis MC58] COG2194 Predicted membrane-associated                                                                                                                                                                                                     | Hypothetical Protein |
| NGO1220 | 0.0134 | -5.62  | down | hypothetical protein\ Context:(NC_002946)-[1170480-1171382]\ Notes:Best Blastp Hit: pir    G81069 conserved hypothetical protein NMB1562 [imported] - Neisseria meningitidis (group B strain MD58) >gi 7226809 gb AAF41916.1  (AE002506) conserved hypothetical protein [Neisseria meningitidis MC58]                                                                                                                    | Hypothetical Protein |
| NGO1228 | 0.0128 | -12.99 | down | hypothetical protein\ Context:(NC_002946)+[1177890-1179005]\ Notes:Best Blastp Hit: emb CAB84987.1  (AL162757) conserved integral membrane hypothetical protein [Neisseria meningitidis] COG0795 Predicted permeases                                                                                                                                                                                                     | Hypothetical Protein |

|         |        |        |      |                                                                                                                                                                                                                                                                                                                                                                                                                                                   |                      |
|---------|--------|--------|------|---------------------------------------------------------------------------------------------------------------------------------------------------------------------------------------------------------------------------------------------------------------------------------------------------------------------------------------------------------------------------------------------------------------------------------------------------|----------------------|
| NGO1245 | 0.0056 | -11.26 | down | hypothetical protein\ Context:(NC_002946)+[1196312-1197178]\ Notes:Best Blastp Hit: pir    D81065<br>hypothetical protein NMB1586 [imported] - Neisseria meningitidis (group B strain MD58)<br>>gi 7226835 gb AAF41939.1  (AE002509) hypothetical protein [Neisseria meningitidis MC58]                                                                                                                                                           | Hypothetical Protein |
| NGO1248 | 0.0056 | -14.09 | down | hypothetical protein\ Context:(NC_002946)-[1199701-1200123]\ Notes:Best Blastp Hit: pir    E81803<br>hypothetical protein NMA1781 [imported] - Neisseria meningitidis (group A strain Z2491)<br>>gi 7380423 emb CAB85009.1  (AL162757) hypothetical protein [Neisseria meningitidis]                                                                                                                                                              | Hypothetical Protein |
| NGO1252 | 0.0211 | -10.51 | down | hypothetical protein\ Context:(NC_002946)+[1202358-1203260]\ Notes:Best Blastp Hit:<br>emb CAB85013.1  (AL162757) conserved hypothetical integral membrane protein [Neisseria<br>meningitidis] COG0697 Predicted permeases                                                                                                                                                                                                                        | Hypothetical Protein |
| NGO1257 | 0.0018 | -14.27 | down | hypothetical protein\ Context:(NC_002946)-[1209532-1209675]\ Notes:                                                                                                                                                                                                                                                                                                                                                                               | Hypothetical Protein |
| NGO1273 | 0.0080 | -4.98  | down | hypothetical protein\ Context:(NC_002946)+[1224369-1224773]\ Notes:Best Blastp Hit:<br>emb CAB85043.1  (AL162757) hypothetical protein [Neisseria meningitidis] COG0537 Diadenosine<br>tetraphosphate (Ap4A)                                                                                                                                                                                                                                      | Hypothetical Protein |
| NGO1274 | 0.0433 | -4.38  | down | hypothetical protein\ Context:(NC_002946)+[1224813-1225994]\ Notes:Best Blastp Hit: pir    H81807<br>conserved hypothetical protein NMA1819 [imported] - Neisseria meningitidis (group A strain Z2491)<br>>gi 6900400 emb CAB72012.1  (AJ391256) hypothetical protein [Neisseria meningitidis]<br>>gi 7380458 emb CAB85044.1  (AL162757) conserved hypothetical protein [Neisseria meningitidis]<br>COG1619 Uncharacterized proteins; homologs of | Hypothetical Protein |
| NGO1282 | 0.0055 | -7.54  | down | hypothetical protein\ Context:(NC_002946)-[1234709-1235023]\ Notes:Best Blastp Hit: pir    G81059<br>hypothetical protein NMB1639 [imported] - Neisseria meningitidis (group B strain MD58)<br>>gi 7226889 gb AAF41988.1  (AE002514) hypothetical protein [Neisseria meningitidis MC58]                                                                                                                                                           | Hypothetical Protein |
| NGO1287 | 0.0030 | -9.50  | down | hypothetical protein\ Context:(NC_002946)-[1241481-1242821]\ Notes:Best Blastp Hit: pir    C81058<br>hypothetical protein NMB1644 [imported] - Neisseria meningitidis (group B strain MD58)<br>>gi 7226895 gb AAF41993.1  (AE002515) hypothetical protein [Neisseria meningitidis MC58]                                                                                                                                                           | Hypothetical Protein |
| NGO1288 | 0.0005 | -42.59 | down | hypothetical protein\ Context:(NC_002946)-[1242895-1244235]\ Notes:Best Blastp Hit: pir    D81058<br>hypothetical protein NMB1645 [imported] - Neisseria meningitidis (group B strain MD58)<br>>gi 7226896 gb AAF41994.1  (AE002515) hypothetical protein [Neisseria meningitidis MC58]                                                                                                                                                           | Hypothetical Protein |
| NGO1289 | 0.0207 | -5.66  | down | hypothetical protein\ Context:(NC_002946)+[1244378-1245004]\ Notes:Best Blastp Hit: pir    D81817<br>probable hemeolysin NMA1900 [imported] - Neisseria meningitidis (group A strain Z2491)<br>>gi 7380534 emb CAB85121.1  (AL162757) putative haemolysin [Neisseria meningitidis] COG1272<br>Predicted membrane proteins; hemolysin                                                                                                              | Hypothetical Protein |
| NGO1293 | 0.0377 | -7.71  | down | hypothetical protein\ Context:(NC_002946)-[1248518-1248802]\ Notes:                                                                                                                                                                                                                                                                                                                                                                               | Hypothetical Protein |
| NGO1297 | 0.0499 | -2.88  | down | hypothetical protein\ Context:(NC_002946)-[1251397-1252752]\ Notes:Best Blastp Hit: pir    E81818<br>conserved hypothetical protein NMA1908 [imported] - Neisseria meningitidis (group A strain Z2491)<br>>gi 7380543 emb CAB85130.1  (AL162757) conserved hypothetical protein [Neisseria meningitidis]                                                                                                                                          | Hypothetical Protein |
| NGO1319 | 0.0178 | -11.41 | down | PqiA\ Context:(NC_002946)+[1276589-1277893]\ Notes:Best Blastp Hit: pir    F81820 hypothetical<br>integral membrane protein NMA1928 [imported] - Neisseria meningitidis (group A strain Z2491)<br>>gi 7380560 emb CAB85148.1  (AL162757) hypothetical integral membrane protein [Neisseria<br>meningitidis]; putative paraquat-inducible protein A                                                                                                | Hypothetical Protein |

|         |        |        |      |                                                                                                                                                                                                                                                                                                                      |                      |
|---------|--------|--------|------|----------------------------------------------------------------------------------------------------------------------------------------------------------------------------------------------------------------------------------------------------------------------------------------------------------------------|----------------------|
| NGO1350 | 0.0003 | -13.15 | down | hypothetical protein\ Context:(NC_002946)+[1309781-1310347]\ Notes:Best Blastp Hit: pir     G81052<br>hypothetical protein NMB1701 [imported] - Neisseria meningitidis (group B strain MD58)<br>>gi 7226956 gb AAF42049.1  (AE002520) hypothetical protein [Neisseria meningitidis MC58]                             | Hypothetical Protein |
| NGO1359 | 0.0250 | -5.50  | down | hypothetical protein\ Context:(NC_002946)-[1319675-1319929]\ Notes:Best Blastp Hit:<br>gb AAF41523.1  (AE002462) hypothetical protein [Neisseria meningitidis MC58]<br>>gi 7226410 gb AAF41558.1  (AE002465) hypothetical protein [Neisseria meningitidis MC58]                                                      | Hypothetical Protein |
| NGO1361 | 0.0048 | -36.06 | down | hypothetical protein\ Context:(NC_002946)+[1320974-1321261]\ Notes:Best Blastp Hit:<br>gb AAF42059.1  (AE002521) L-lactate permease-related protein [Neisseria meningitidis MC58]<br>COG1620 L-lactate permease                                                                                                      | Hypothetical Protein |
| NGO1362 | 0.0316 | -14.34 | down | hypothetical protein\ Context:(NC_002946)+[1321289-1321438]\ Notes:Best Blastp Hit:<br>emb CAB85187.1  (AL162757) hypothetical protein [Neisseria meningitidis]                                                                                                                                                      | Hypothetical Protein |
| NGO1370 | 0.0007 | -11.75 | down | hypothetical protein\ Context:(NC_002946)-[1334010-1335419]\ Notes:Best Blastp Hit: pir     E81826<br>probable integral membrane protein NMA1975 [imported] - Neisseria meningitidis (group A strain<br>Z2491) >gi 7380607 emb CAB85195.1  (AL162757) putative integral membrane protein [Neisseria<br>meningitidis] | Hypothetical Protein |
| NGO1430 | 0.0451 | -34.28 | down | hypothetical protein\ Context:(NC_002946)+[1392703-1393950]\ Notes:Best Blastp Hit:<br>gb AAA25906.1  (M60717) nosA [Pseudomonas stutzeri]                                                                                                                                                                           | Hypothetical Protein |
| NGO1444 | 0.0076 | -16.26 | down | hypothetical protein\ Context:(NC_002946)+[1412050-1412229]\ Notes:                                                                                                                                                                                                                                                  | Hypothetical Protein |
| NGO1451 | 0.0319 | -8.64  | down | hypothetical protein\ Context:(NC_002946)+[1416890-1417387]\ Notes:Best Blastp Hit: pir     C81186<br>hypothetical protein NMB0541 [imported] - Neisseria meningitidis (group B strain MD58)<br>>gi 7225767 gb AAF40970.1  (AE002410) hypothetical protein [Neisseria meningitidis MC58]                             | Hypothetical Protein |
| NGO1465 | 0.0100 | -24.59 | down | hypothetical protein\ Context:(NC_002946)-[1428738-1429151]\ Notes:Best Blastp Hit:<br>gb AAD38303.1 AF036242_3 (AF036242) unknown [Neisseria meningitidis]                                                                                                                                                          | Hypothetical Protein |
| NGO1469 | 0.0261 | -8.28  | down | hypothetical protein\ Context:(NC_002946)+[1433076-1433204]\ Notes:Best Blastp Hit:<br>emb CAB84440.1  (AL162755) hypothetical protein NMA1178 [Neisseria meningitidis]                                                                                                                                              | Hypothetical Protein |
| NGO1516 | 0.0006 | -28.07 | down | hypothetical protein\ Context:(NC_002946)-[1484775-1485977]\ Notes:Best Blastp Hit:<br>emb CAB85264.1  (AL162758) hypothetical integral membrane protein [Neisseria meningitidis]                                                                                                                                    | Hypothetical Protein |
| NGO1518 | 0.0518 | -5.08  | down | hypothetical protein\ Context:(NC_002946)-[1486339-1487112]\ Notes:Best Blastp Hit:<br>emb CAB63177.1  (AL133469) hypothetical protein SCM10.16c [Streptomyces coelicolor A3(2)]                                                                                                                                     | Hypothetical Protein |
| NGO1558 | 0.0036 | -15.55 | down | hypothetical protein\ Context:(NC_002946)-[1533130-1533348]\ Notes:                                                                                                                                                                                                                                                  | Hypothetical Protein |
| NGO1563 | 0.0073 | -5.54  | down | hypothetical protein\ Context:(NC_002946)+[1535587-1535772]\ Notes:                                                                                                                                                                                                                                                  | Hypothetical Protein |
| NGO1576 | 0.0026 | -19.49 | down | hypothetical protein\ Context:(NC_002946)+[1551327-1551491]\ Notes:                                                                                                                                                                                                                                                  | Hypothetical Protein |
| NGO1594 | 0.0201 | -3.67  | down | hypothetical protein\ Context:(NC_002946)+[1566514-1566786]\ Notes:                                                                                                                                                                                                                                                  | Hypothetical Protein |
| NGO1601 | 0.0050 | -23.64 | down | hypothetical protein\ Context:(NC_002946)+[1572106-1573584]\ Notes:Best Blastp Hit:<br>gb AAB61771.1  (M84113) ORF1 [Neisseria gonorrhoeae]                                                                                                                                                                          | Hypothetical Protein |
| NGO1604 | 0.0004 | -13.89 | down | hypothetical protein\ Context:(NC_002946)+[1575327-1575569]\ Notes:Best Blastp Hit: pir     G81933<br>hypothetical protein NMA0876 [imported] - Neisseria meningitidis (group A strain Z2491)<br>>gi 7379591 emb CAB84156.1  (AL162754) hypothetical protein NMA0876 [Neisseria meningitidis]                        | Hypothetical Protein |
| NGO1664 | 0.0102 | -14.60 | down | hypothetical protein\ Context:(NC_002946)+[1618903-1619079]\ Notes:Best Blastp Hit:<br>emb CAB85362.1  (AL162758) hypothetical protein [Neisseria meningitidis]                                                                                                                                                      | Hypothetical Protein |

|         |        |        |      |                                                                                                                                                                                                                                                                                                                                                                                                         |                      |
|---------|--------|--------|------|---------------------------------------------------------------------------------------------------------------------------------------------------------------------------------------------------------------------------------------------------------------------------------------------------------------------------------------------------------------------------------------------------------|----------------------|
| NGO1672 | 0.0194 | -24.20 | down | hypothetical protein\ Context:(NC_002946)+[1627156-1627473]\ Notes:Best Blastp Hit: pir    S77587<br>hypothetical protein Y - Neisseria gonorrhoeae >gi 996086 gb AAC43466.1  (U32588) ORFY; non-essential for pilus assembly; [Neisseria gonorrhoeae]                                                                                                                                                  | Hypothetical Protein |
| NGO1686 | 0.0224 | -3.75  | down | hypothetical protein\ Context:(NC_002946)-[1638678-1639970]\ Notes:Best Blastp Hit: possibly phase variable - 8A residue homopolymer repeat in the coding sequence (ON) COG0739 Membrane proteins related to                                                                                                                                                                                            | Hypothetical Protein |
| NGO1691 | 0.0108 | -23.72 | down | hypothetical protein\ Context:(NC_002946)+[1644588-1644734]\ Notes:                                                                                                                                                                                                                                                                                                                                     | Hypothetical Protein |
| NGO1702 | 0.0396 | -4.44  | down | hypothetical protein\ Context:(NC_002946)-[1658587-1659111]\ Notes:Best Blastp Hit: pir    F81792<br>hypothetical protein NMA2195 [imported] - Neisseria meningitidis (group A strain Z2491)<br>>gi 6900420 emb CAB72030.1  (AJ391261) hypothetical protein [Neisseria meningitidis]<br>>gi 7380814 emb CAB85406.1  (AL162758) hypothetical protein [Neisseria meningitidis]                            | Hypothetical Protein |
| NGO1712 | 0.0139 | -5.62  | down | hypothetical protein\ Context:(NC_002946)-[1669596-1670228]\ Notes:Best Blastp Hit:<br>emb CAB85415.1  (AL162758) hypothetical protein [Neisseria meningitidis] COG1611 Predicted Rossmann fold nucleotide-binding                                                                                                                                                                                      | Hypothetical Protein |
| NGO1719 | 0.0043 | -10.55 | down | hypothetical protein\ Context:(NC_002946)+[1680196-1681155]\ Notes:Best Blastp Hit:<br>gb AAF40730.1  (AE002384) conserved hypothetical protein [Neisseria meningitidis MC58] COG0429<br>Predicted hydrolase of the                                                                                                                                                                                     | Hypothetical Protein |
| NGO1720 | 0.0209 | -9.17  | down | hypothetical protein\ Context:(NC_002946)-[1681152-1681262]\ Notes:                                                                                                                                                                                                                                                                                                                                     | Hypothetical Protein |
| NGO1759 | 0.0259 | -9.18  | down | hypothetical protein\ Context:(NC_002946)-[1722143-1722478]\ Notes:Best Blastp Hit:<br>gb AAF40679.1  (AE002380) hypothetical protein [Neisseria meningitidis MC58]                                                                                                                                                                                                                                     | Hypothetical Protein |
| NGO1760 | 0.0304 | -16.48 | down | hypothetical protein\ Context:(NC_002946)-[1722492-1722965]\ Notes:Best Blastp Hit: pir    H81222<br>hypothetical protein NMB0222 [imported] - Neisseria meningitidis (group B strain MD58; group A strain Z2491) >gi 7225445 gb AAF40678.1  (AE002380) hypothetical protein [Neisseria meningitidis MC58] >gi 7378813 emb CAB83355.1  (AL162752) hypothetical protein NMA0037 [Neisseria meningitidis] | Hypothetical Protein |
| NGO1771 | 0.0004 | -14.39 | down | hypothetical protein\ Context:(NC_002946)-[1737443-1738435]\ Notes:Best Blastp Hit: pir    E81225<br>hypothetical protein NMB0213 [imported] - Neisseria meningitidis (group B strain MD58)<br>>gi 7225434 gb AAF40669.1  (AE002378) hypothetical protein [Neisseria meningitidis MC58]                                                                                                                 | Hypothetical Protein |
| NGO1777 | 0.0024 | -45.25 | down | hypothetical protein\ Context:(NC_002946)+[1747904-1748062]\ Notes:Best Blastp Hit:<br>gb AAF42457.1  (AE002563) hypothetical protein [Neisseria meningitidis MC58]                                                                                                                                                                                                                                     | Hypothetical Protein |
| NGO1784 | 0.0350 | -7.88  | down | hypothetical protein\ Context:(NC_002946)-[1753810-1754115]\ Notes:Best Blastp Hit:<br>gb AAF40654.1  (AE002377) hypothetical protein [Neisseria meningitidis MC58]                                                                                                                                                                                                                                     | Hypothetical Protein |
| NGO1789 | 0.0378 | -4.68  | down | hypothetical protein\ Context:(NC_002946)+[1761924-1762508]\ Notes:Best Blastp Hit: pir    B81999<br>ribonuclease H (EC 3.1.26.4) II NMA0075 [imported] - Neisseria meningitidis (group A strain Z2491)<br>>gi 7378848 emb CAB83391.1  (AL162752) ribonuclease HII [Neisseria meningitidis] COG0164<br>Ribonuclease HII                                                                                 | Hypothetical Protein |
| NGO1792 | 0.0070 | -9.56  | down | hypothetical protein\ Context:(NC_002946)-[1764847-1765422]\ Notes:Best Blastp Hit:<br>emb CAB83394.1  (AL162752) putative integral membrane protein [Neisseria meningitidis]                                                                                                                                                                                                                           | Hypothetical Protein |
| NGO1846 | 0.0008 | -31.40 | down | hypothetical protein\ Context:(NC_002946)-[1812222-1812371]\ Notes:Best Blastp Hit:<br>emb CAB83453.1  (AL162752) hypothetical protein NMA0138 [Neisseria meningitidis]                                                                                                                                                                                                                                 | Hypothetical Protein |
| NGO1847 | 0.0046 | -16.84 | down | hypothetical protein\ Context:(NC_002946)-[1812378-1813307]\ Notes:Best Blastp Hit:<br>gb AAF41823.1  (AE002496) conserved hypothetical protein [Neisseria meningitidis MC58]                                                                                                                                                                                                                           | Hypothetical Protein |
| NGO1849 | 0.0011 | -13.64 | down | hypothetical protein\ Context:(NC_002946)-[1813761-1814822]\ Notes:Best Blastp Hit: possibly phase variable - 8G residue homopolymer repeat in the coding sequence (ON)                                                                                                                                                                                                                                 | Hypothetical Protein |

|         |        |        |      |                                                                                                                                                                                                                                                                                                                                                                                                                                                                   |                      |
|---------|--------|--------|------|-------------------------------------------------------------------------------------------------------------------------------------------------------------------------------------------------------------------------------------------------------------------------------------------------------------------------------------------------------------------------------------------------------------------------------------------------------------------|----------------------|
| NGO1874 | 0.0074 | -52.58 | down | hypothetical protein\ Context:(NC_002946)+[1844694-1844858]\ Notes:Best Blastp Hit: gb AAA96487.1  (L36381) putative [Neisseria gonorrhoeae]                                                                                                                                                                                                                                                                                                                      | Hypothetical Protein |
| NGO1886 | 0.0010 | -32.15 | down | hypothetical protein\ Context:(NC_002946)-[1854669-1855091]\ Notes:Best Blastp Hit: emb CAB83494.1  (AL162752) hypothetical protein NMA0179 [Neisseria meningitidis]                                                                                                                                                                                                                                                                                              | Hypothetical Protein |
| NGO1913 | 0.0463 | -13.54 | down | hypothetical protein\ Context:(NC_002946)+[1891120-1891512]\ Notes:Best Blastp Hit: possibly phase variable - 8A residue homopolymer repeat in the coding sequence (ON)                                                                                                                                                                                                                                                                                           | Hypothetical Protein |
| NGO1938 | 0.0437 | -17.46 | down | hypothetical protein\ Context:(NC_002946)-[1914832-1915035]\ Notes:Best Blastp Hit: pir   F81000 hypothetical protein NMB2152 [imported] - Neisseria meningitidis (group B strain MD58) >gi 7227410 gb AAF42460.1  (AE002563) hypothetical protein [Neisseria meningitidis MC58]                                                                                                                                                                                  | Hypothetical Protein |
| NGO1948 | 0.0076 | -8.61  | down | hypothetical protein\ Context:(NC_002946)-[1921470-1921919]\ Notes:Best Blastp Hit: pir   B81002 conserved hypothetical protein NMB2140 [imported] - Neisseria meningitidis (group B strain MD58) >gi 7227397 gb AAF42448.1  (AE002562) conserved hypothetical protein [Neisseria meningitidis MC58]                                                                                                                                                              | Hypothetical Protein |
| NGO1952 | 0.0023 | -20.01 | down | hypothetical protein\ Context:(NC_002946)-[1924516-1924728]\ Notes:Best Blastp Hit: gb AAF42445.1  (AE002562) hypothetical protein [Neisseria meningitidis MC58]                                                                                                                                                                                                                                                                                                  | Hypothetical Protein |
| NGO1960 | 0.0395 | -14.04 | down | hypothetical protein\ Context:(NC_002946)+[1936946-1937212]\ Notes:                                                                                                                                                                                                                                                                                                                                                                                               | Hypothetical Protein |
| NGO1976 | 0.0162 | -5.89  | down | hypothetical protein\ Context:(NC_002946)-[1953306-1953539]\ Notes:Best Blastp Hit: gb AAF42417.1  (AE002559) hypothetical protein [Neisseria meningitidis MC58]                                                                                                                                                                                                                                                                                                  | Hypothetical Protein |
| NGO1977 | 0.0249 | -5.83  | down | hypothetical protein\ Context:(NC_002946)+[1953539-1954198]\ Notes:Best Blastp Hit: emb CAB83635.1  (AL162752) hypothetical protein NMA0330 [Neisseria meningitidis] COG0212 5-formyltetrahydrofolate cyclo-ligase                                                                                                                                                                                                                                                | Hypothetical Protein |
| NGO2004 | 0.0248 | -15.46 | down | hypothetical protein\ Context:(NC_002946)+[1976422-1976658]\ Notes:                                                                                                                                                                                                                                                                                                                                                                                               | Hypothetical Protein |
| NGO2006 | 0.0270 | -23.18 | down | hypothetical protein\ Context:(NC_002946)-[1977556-1977750]\ Notes:Best Blastp Hit: emb CAB83663.1  (AL162752) hypothetical protein NMA0362 [Neisseria meningitidis]                                                                                                                                                                                                                                                                                              | Hypothetical Protein |
| NGO2019 | 0.0421 | -3.86  | down | hypothetical protein\ Context:(NC_002946)-[1989359-1990129]\ Notes:Best Blastp Hit: pir   B81010 thiF protein NMB2062 [imported] - Neisseria meningitidis (group B strain MD58) >gi 7227324 gb AAF42381.1  (AE002556) thiF protein [Neisseria meningitidis MC58] COG0476 Dinucleotide-utilizing enzymes involved in                                                                                                                                               | Hypothetical Protein |
| NGO2033 | 0.0024 | -4.89  | down | putative hydrolase\ Context:(NC_002946)-[2003947-2004579]\ Notes:Best Blastp Hit: pir   A81955 probable hydrolase NMA0387 [imported] - Neisseria meningitidis (group A strain Z2491) >gi 7379140 emb CAB83688.1  (AL162753) putative hydrolase [Neisseria meningitidis] COG0491 Zn-dependent hydrolases                                                                                                                                                           | Hypothetical Protein |
| NGO2058 | 0.0033 | -17.53 | down | hypothetical protein\ Context:(NC_002946)+[2032543-2033025]\ Notes:Best Blastp Hit: pir   E81245 conserved hypothetical protein NMB0043 [imported] - Neisseria meningitidis (group B strain MD58; group A strain Z2491) >gi 7225263 gb AAF40514.1  (AE002362) conserved hypothetical protein [Neisseria meningitidis MC58] >gi 7379050 emb CAB83596.1  (AL162752) hypothetical protein NMA0289 [Neisseria meningitidis] COG1546 Uncharacterized protein CinA/YgaD | Hypothetical Protein |
| NGO2106 | 0.0195 | -11.85 | down | hypothetical protein\ Context:(NC_002946)+[2089206-2089541]\ Notes:                                                                                                                                                                                                                                                                                                                                                                                               | Hypothetical Protein |
| NGO2108 | 0.0075 | -61.02 | down | hypothetical protein\ Context:(NC_002946)-[2090831-2091019]\ Notes:                                                                                                                                                                                                                                                                                                                                                                                               | Hypothetical Protein |
| NGO2113 | 0.0001 | -51.17 | down | hypothetical protein\ Context:(NC_002946)+[2099285-2100214]\ Notes:Best Blastp Hit: gb AAG03531.1 AE004452_3 (AE004452) conserved hypothetical protein [Pseudomonas aeruginosa]                                                                                                                                                                                                                                                                                   | Hypothetical Protein |
| NGO2136 | 0.0169 | -8.68  | down | hypothetical protein\ Context:(NC_002946)+[2116331-2116516]\ Notes:                                                                                                                                                                                                                                                                                                                                                                                               | Hypothetical Protein |

|         |        |        |      |                                                                                                                                                                                                                                                                                                                                                                                                                                                               |                              |
|---------|--------|--------|------|---------------------------------------------------------------------------------------------------------------------------------------------------------------------------------------------------------------------------------------------------------------------------------------------------------------------------------------------------------------------------------------------------------------------------------------------------------------|------------------------------|
| NGO2138 | 0.0107 | -5.67  | down | putative ABC transporter; permease protein\ Context:(NC_002946)+[2117408-2118094]\ Notes:Best Blastp Hit: pir   D81023 ABC transporter; permease protein NMB1947 [imported] - Neisseria meningitidis (group B strain MD58) >gi 7227206 gb AAF42276.1  (AE002543) ABC transporter; permease protein [Neisseria meningitidis MC58] COG2011 Permease component of an uncharacterized ABC                                                                         | Hypothetical Protein         |
| NGO2162 | 0.0090 | -9.00  | down | hypothetical protein\ Context:(NC_002946)-[2138449-2138934]\ Notes:Best Blastp Hit: gb AAF42252.1  (AE002541) conserved hypothetical protein [Neisseria meningitidis MC58]                                                                                                                                                                                                                                                                                    | Hypothetical Protein         |
| NGO2179 | 0.0052 | -28.75 | down | hypothetical protein\ Context:(NC_002946)+[2152852-2152986]\ Notes:                                                                                                                                                                                                                                                                                                                                                                                           | Hypothetical Protein         |
| NGO0021 | 0.0135 | -11.85 | down | putative TonB-dependent receptor protein; iron related\ Context:(NC_002946)-[17323-19500]\ Notes:Best Blastp Hit: pir   D81976 probable ferric siderophore receptor protein NMA0575 [imported] - Neisseria meningitidis (group A strain Z2491) >gi 7379311 emb CAB83866.1  (AL162753) putative ferric siderophore receptor protein [Neisseria meningitidis] COG1629 Outer membrane receptor proteins; mostly Fe                                               | Iron Storage and Acquisition |
| NGO0023 | 0.0307 | -10.58 | down | putative ABC transporter; periplasmic binding protein;iron related\ Context:(NC_002946)-[20119-21090]\ Notes:Best Blastp Hit: gb AAF42214.1  (AE002538) ABC transporter; periplasmic solute-binding protein; putative [Neisseria meningitidis MC58] COG0614 Ferrichrome-binding periplasmic proteins                                                                                                                                                          | Iron Storage and Acquisition |
| NGO1775 | 0.0030 | -10.27 | down | putative ferredoxin\ Context:(NC_002946)+[1745797-1746636]\ Notes:Best Blastp Hit: emb CAB83377.1  (AL162752) putative ferredoxin [Neisseria meningitidis] COG1145 Ferredoxin 2                                                                                                                                                                                                                                                                               | Iron Storage and Acquisition |
| NGO2090 | 0.0353 | -11.76 | down | putative ABC transporter; permease protein; enterobactin\ Context:(NC_002946)-[2066574-2067548]\ Notes:Best Blastp Hit: gb AAF42318.1  (AE002548) iron(III) ABC transporter; permease protein [Neisseria meningitidis MC58] COG0609 Iron; hemin; cobalamine permeases                                                                                                                                                                                         | Iron Storage and Acquisition |
| NGO2176 | 0.0060 | -41.18 | down | hypothetical protein\ Context:(NC_002946)-[2150090-2151172]\ Notes:Best Blastp Hit: sp P45610 TONB_KLEPN TonB protein >gi 484474 pir JN0788 tonB protein - Klebsiella pneumoniae >gi 405758 emb CAA48498.1  (X68478) TonB [Klebsiella pneumoniae]                                                                                                                                                                                                             | Iron Storage and Acquisition |
| NGO0065 | 0.0425 | -6.12  | down | putative lipo-oligosaccharide acyltransferase\ Context:(NC_002946)+[64986-66860]\ Notes:Best Blastp Hit: gb AAF42171.1  (AE002533) lipopolysaccharide biosynthesis protein WbpC; putative [Neisseria meningitidis MC58] COG1835 Predicted acyltransferases                                                                                                                                                                                                    | Lipid/LPS Biosynthesis       |
| NGO0205 | 0.0013 | -15.18 | down | LolA\ Context:(NC_002946)+[208087-208710]\ Notes:Best Blastp Hit: sp P57068 LOLA_NEIMB outer-membrane lipoproteins carrier protein precursor >gi 11281795 pir C81178 outer membrane lipoprotein carrier protein NMB0622 [imported] - Neisseria meningitidis (group B strain MD58) >gi 7225852 gb AAF41048.1  (AE002417) outer membrane lipoprotein carrier protein [Neisseria meningitidis MC58]; putative lipoprotein carrier precursor; periplasmic binding | Lipid/LPS Biosynthesis       |
| NGO0242 | 0.0067 | -9.40  | down | tetraacyldisaccharide 4'-kinase\ Context:(NC_002946)+[244922-245953]\ Notes:transfers the gamma-phosphate of ATP to the 4' position of a tetraacyldisaccharide 1-phosphate intermediate to form tetraacyldisaccharide 1;4'-bis-phosphate                                                                                                                                                                                                                      | Lipid/LPS Biosynthesis       |
| NGO1055 | 0.0009 | -8.61  | down | putative acyl-CoA hydrolase\ Context:(NC_002946)+[1014597-1015079]\ Notes:Best Blastp Hit: pir   G81079 acyl CoA thioester hydrolase family protein NMB1482 [imported] - Neisseria meningitidis (group B strain MD58) >gi 7226722 gb AAF41838.1  (AE002497) acyl CoA thioester hydrolase family protein [Neisseria meningitidis MC58] COG1607 Acyl-CoA hydrolase                                                                                              | Lipid/LPS Biosynthesis       |



|         |        |        |      |                                                                                                                                                                                                                                                                                                                                                                                                                                                                                   |                          |
|---------|--------|--------|------|-----------------------------------------------------------------------------------------------------------------------------------------------------------------------------------------------------------------------------------------------------------------------------------------------------------------------------------------------------------------------------------------------------------------------------------------------------------------------------------|--------------------------|
| NGO1247 | 0.0168 | -6.94  | down | hypothetical protein\ Context:(NC_002946)-[1199032-1199595]\ Notes:Best Blastp Hit: pir     C81803 CDPdiacylglycerol--glycerol-3-phosphate 3-phosphatidyltransferase (EC 2.7.8.5) NMA1779 [imported] - Neisseria meningitidis (group A strain Z2491) >gi 7380421 emb CAB85007.1  (AL162757) CDP-diacylglycerol--glycerol-3-phosphate 3-phosphatidyltransferase [Neisseria meningitidis] COG0558 Phosphatidylglycerophosphate synthase                                             | Lipid/LPS Biosynthesis   |
| NGO1352 | 0.0146 | -6.97  | down | putative 3-oxoacyl-(acyl-carrier-protein) synthase\ Context:(NC_002946)+[1311101-1312243]\ Notes:Best Blastp Hit: pir     A81053 3-oxoacyl-(acyl-carrier-protein) synthase II NMB1703 [imported] - Neisseria meningitidis (group B strain MD58) >gi 7226958 gb AAF42051.1  (AE002520) 3-oxoacyl-(acyl-carrier-protein) synthase II [Neisseria meningitidis MC58] COG0304 3-oxoacyl-(acyl-carrier-protein) synthase I                                                              | Lipid/LPS Biosynthesis   |
| NGO1782 | 0.0082 | -7.53  | down | LpxB\ Context:(NC_002946)-[1751413-1752585]\ Notes:Best Blastp Hit: pir     A81226 lipid-A-disaccharide synthase NMB0199 [imported] - Neisseria meningitidis (group B strain MD58) >gi 7225420 gb AAF40656.1  (AE002377) lipid-A-disaccharide synthase [Neisseria meningitidis MC58] COG0763 Lipid A disaccharide synthetase; putative lipid-A-disaccharide synthase                                                                                                              | Lipid/LPS Biosynthesis   |
| NGO0465 | 0.0051 | -5.66  | down | putative phage associated protein\ Context:(NC_002946)-[457883-458419]\ Notes:                                                                                                                                                                                                                                                                                                                                                                                                    | Phage Associated Protein |
| NGO0482 | 0.0108 | -10.37 | down | putative phage associated protein\ Context:(NC_002946)-[465465-465827]\ Notes:                                                                                                                                                                                                                                                                                                                                                                                                    | Phage Associated Protein |
| NGO0484 | 0.0051 | -44.79 | down | putative phage associated protein\ Context:(NC_002946)+[465978-467042]\ Notes:Best Blastp Hit: gi 9634200 Gp54 [Bacteriophage HK97] >gi 6901629 gb AAF31132.1  (AF069529) Gp54 [Bacteriophage HK97]                                                                                                                                                                                                                                                                               | Phage Associated Protein |
| NGO0491 | 0.0005 | -37.07 | down | putative phage associated protein\ Context:(NC_002946)+[470508-470915]\ Notes:                                                                                                                                                                                                                                                                                                                                                                                                    | Phage Associated Protein |
| NGO0496 | 0.0361 | -5.40  | down | putative phage associated protein\ Context:(NC_002946)+[474408-476555]\ Notes:Best Blastp Hit: pir     G81057 hypothetical protein NMB1656 [imported] - Neisseria meningitidis (group B strain MD58) >gi 7226908 gb AAF42005.1  (AE002516) hypothetical protein [Neisseria meningitidis MC58]                                                                                                                                                                                     | Phage Associated Protein |
| NGO0498 | 0.0426 | -7.72  | down | putative phage associated protein\ Context:(NC_002946)+[477821-479320]\ Notes:Best Blastp Hit: sp P23739 SUIS_RAT sucrose-isomaltase; intestinal [contains: sucrose ; isomaltase ]                                                                                                                                                                                                                                                                                                | Phage Associated Protein |
| NGO0501 | 0.0251 | -10.08 | down | putative phage associated protein\ Context:(NC_002946)+[480370-480702]\ Notes:                                                                                                                                                                                                                                                                                                                                                                                                    | Phage Associated Protein |
| NGO0505 | 0.0043 | -18.89 | down | putative phage associated protein\ Context:(NC_002946)+[482328-482594]\ Notes:Best Blastp Hit: gb AAD32742.1  (AF127374) MmcR [Streptomyces lavendulae]                                                                                                                                                                                                                                                                                                                           | Phage Associated Protein |
| NGO0508 | 0.0130 | -28.14 | down | putative phage associated protein\ Context:(NC_002946)+[484046-484477]\ Notes:Best Blastp Hit: sp P77685 SPR_ECOLI lipoprotein SPR precursor >gi 7430106 pir    F64986 hypothetical protein b2175 - Escherichia coli (strain K-12) >gi 1498150 dbj BAA13140.1  (D86610) Spr [Escherichia coli] >gi 1736840 dbj BAA15983.1  (D90849) Probable lipoprotein NlpC homolog precursor. [Escherichia coli] >gi 1788501 gb AAC75236.1  (AE000307) putative lipoprotein [Escherichia coli] | Phage Associated Protein |
| NGO0510 | 0.0435 | -22.39 | down | putative phage associated protein\ Context:(NC_002946)+[485026-489171]\ Notes:Best Blastp Hit: gi 10955733 phage lambda host specific protein J [Yersinia pestis] >gi 7467468 pir    T14652 protein J - Yersinia pestis plasmid pMT1 >gi 2996342 gb AAC13222.1  (AF053947) phage lambda host specific protein J [Yersinia pestis]                                                                                                                                                 | Phage Associated Protein |
| NGO0512 | 0.0057 | -53.52 | down | putative phage associated protein\ Context:(NC_002946)-[489593-490528]\ Notes:Best Blastp Hit: gb AAB32262.1 S75490_1 (S75490) orf2 [Neisseria gonorrhoeae]                                                                                                                                                                                                                                                                                                                       | Phage Associated Protein |
| NGO0513 | 0.0082 | -24.63 | down | putative phage associated protein\ Context:(NC_002946)+[489659-490129]\ Notes:                                                                                                                                                                                                                                                                                                                                                                                                    | Phage Associated Protein |
| NGO0515 | 0.0261 | -4.01  | down | putative phage associated protein\ Context:(NC_002946)-[490591-490824]\ Notes:                                                                                                                                                                                                                                                                                                                                                                                                    | Phage Associated Protein |
| NGO0518 | 0.0393 | -8.66  | down | putative phage associated protein\ Context:(NC_002946)+[491622-492161]\ Notes:                                                                                                                                                                                                                                                                                                                                                                                                    | Phage Associated Protein |

|         |        |        |      |                                                                                                                                                                                                                                                                                                                                                                                                                                                                                                     |                          |
|---------|--------|--------|------|-----------------------------------------------------------------------------------------------------------------------------------------------------------------------------------------------------------------------------------------------------------------------------------------------------------------------------------------------------------------------------------------------------------------------------------------------------------------------------------------------------|--------------------------|
| NGO0520 | 0.0034 | -18.03 | down | putative phage associated protein\ Context:(NC_002946)+[492680-492991]\ Notes:                                                                                                                                                                                                                                                                                                                                                                                                                      | Phage Associated Protein |
| NGO0521 | 0.0006 | -41.07 | down | phage associated protein\ Context:(NC_002946)+[493004-493153]\ Notes:Best Blastp Hit: gb AAF41392.1  (AE002449) hypothetical protein [Neisseria meningitidis MC58]                                                                                                                                                                                                                                                                                                                                  | Phage Associated Protein |
| NGO0522 | 0.0440 | -32.67 | down | putative tail length tape measure protein; putative phage associated protein\ Context:(NC_002946)+[493183-496230]\ Notes:Best Blastp Hit: gi 9634160 tail length tape measure protein [Bacteriophage HK97] >gi 6901589 gb AAF31092.1 AF069529_5 (AF069529) tail length tape measure protein [Bacteriophage HK97]                                                                                                                                                                                    | Phage Associated Protein |
| NGO0723 | 0.0457 | -5.39  | down | putative phage associated protein\ Context:(NC_002946)+[722896-723144]\ Notes:Best Blastp Hit: emb CAB84476.1  (AL162755) hypothetical protein NMA1216 [Neisseria meningitidis]                                                                                                                                                                                                                                                                                                                     | Phage Associated Protein |
| NGO0727 | 0.0312 | -4.35  | down | putative baseplate protein; putative phage associated protein\ Context:(NC_002946)-[726767-727315]\ Notes:Best Blastp Hit: gi 9634072 P2 J homolog; baseplate or base of tail fibre [Enterobacteria phage 186] >gi 3522880 gb AAC34162.1  (U32222) P2 J homolog; baseplate or base of tail fibre [Enterobacteria phage 186]                                                                                                                                                                         | Phage Associated Protein |
| NGO1020 | 0.0136 | -29.43 | down | putative phage associated protein\ Context:(NC_002946)+[982212-984008]\ Notes:                                                                                                                                                                                                                                                                                                                                                                                                                      | Phage Associated Protein |
| NGO1085 | 0.0323 | -4.16  | down | putative phage associated protein\ Context:(NC_002946)+[1044447-1045292]\ Notes:Best Blastp Hit: sp P44189 YE18_HAEIN hypothetical protein HI1418 >gi 1074769 pir A64029 hypothetical protein HI1418 - Haemophilus influenzae (strain Rd KW20) >gi 1574254 gb AAC23068.1  (U32821) H. influenzae predicted coding region HI1418 [Haemophilus influenzae Rd]                                                                                                                                         | Phage Associated Protein |
| NGO1086 | 0.0004 | -10.84 | down | putative phage associated protein\ Context:(NC_002946)-[1045279-1045479]\ Notes:Best Blastp Hit: gb AAF41392.1  (AE002449) hypothetical protein [Neisseria meningitidis MC58]                                                                                                                                                                                                                                                                                                                       | Phage Associated Protein |
| NGO1087 | 0.0528 | -10.47 | down | putative phage associated protein\ Context:(NC_002946)+[1045494-1046174]\ Notes:Best Blastp Hit: pir T32944 hypothetical protein W01B11.5 - Caenorhabditis elegans >gi 2804494 gb AAB97600.1  (AF043704) similar to S. cerevisiae SLA2 (GB:Z22811) [Caenorhabditis elegans]                                                                                                                                                                                                                         | Phage Associated Protein |
| NGO1088 | 0.0005 | -9.02  | down | putative phage associated protein\ Context:(NC_002946)-[1046153-1046638]\ Notes:                                                                                                                                                                                                                                                                                                                                                                                                                    | Phage Associated Protein |
| NGO1089 | 0.0052 | -13.76 | down | putative phage associated protein\ Context:(NC_002946)-[1046644-1047117]\ Notes:                                                                                                                                                                                                                                                                                                                                                                                                                    | Phage Associated Protein |
| NGO1091 | 0.0068 | -9.51  | down | putative phage associated protein\ Context:(NC_002946)-[1048489-1048887]\ Notes:Best Blastp Hit: gb AAF79659.1 AC025416_33 (AC025416) F5O11.3 [Arabidopsis thaliana]                                                                                                                                                                                                                                                                                                                                | Phage Associated Protein |
| NGO1096 | 0.0081 | -30.61 | down | putative phage associated protein\ Context:(NC_002946)-[1058422-1058637]\ Notes:                                                                                                                                                                                                                                                                                                                                                                                                                    | Phage Associated Protein |
| NGO1097 | 0.0069 | -5.39  | down | putative phage associated protein\ Context:(NC_002946)-[1058674-1060926]\ Notes:Best Blastp Hit: gi 9632518 putative portal protein [Bacteriophage 933W] >gi 9633447 ref NP_050550.1  hypothetical protein [Bacteriophage VT2-Sa] >gi 4585429 gb AAD25457.1 AF125520_52 (AF125520) putative portal protein [Bacteriophage 933W] >gi 5881643 dbj BAA84334.1  (AP000363) hypothetical protein [Bacteriophage VT2-Sa] >gi 7649880 dbj BAA94158.1  (AP000422) portal protein [Escherichia coli O157:H7] | Phage Associated Protein |
| NGO1099 | 0.0230 | -4.68  | down | putative phage associated protein\ Context:(NC_002946)-[1062181-1062423]\ Notes:                                                                                                                                                                                                                                                                                                                                                                                                                    | Phage Associated Protein |
| NGO1101 | 0.0366 | -6.15  | down | putative phage associated protein\ Context:(NC_002946)-[1062720-1063034]\ Notes:Best Blastp Hit: gb AAF53095.1  (AE003632) CG14926 gene product [Drosophila melanogaster]                                                                                                                                                                                                                                                                                                                           | Phage Associated Protein |
| NGO1102 | 0.0397 | -8.52  | down | putative phage associated protein\ Context:(NC_002946)-[1063207-1063725]\ Notes:Best Blastp Hit: gb AAF24756.1  (AF148565) putative endonuclease [Streptococcus thermophilus bacteriophage ST3]                                                                                                                                                                                                                                                                                                     | Phage Associated Protein |
| NGO1103 | 0.0141 | -17.91 | down | putative phage associated protein\ Context:(NC_002946)-[1063716-1064099]\ Notes:Best Blastp Hit: dbj BAA94132.1  (AP000422) hypothetical protein [Escherichia coli O157:H7]                                                                                                                                                                                                                                                                                                                         | Phage Associated Protein |

|         |        |        |      |                                                                                                                                                                                                                                                                                                                                                                                                                                                                                             |                          |
|---------|--------|--------|------|---------------------------------------------------------------------------------------------------------------------------------------------------------------------------------------------------------------------------------------------------------------------------------------------------------------------------------------------------------------------------------------------------------------------------------------------------------------------------------------------|--------------------------|
| NGO1110 | 0.0448 | -4.04  | down | putative replicative DNA helicase; putative phage associated protein\ Context:(NC_002946)-[1066486-1067847]\ Notes:Best Blastp Hit: sp P37469 DNAC_BACSU replicative DNA helicase >gi 2127189 pir  S65970 replicative DNA helicase dnaC - Bacillus subtilis >gi 467330 dbj BAA05176.1  (D26185) replicative DNA helicase [Bacillus subtilis] >gi 2636591 emb CAB16081.1  (Z99124) replicative DNA helicase [Bacillus subtilis] COG0305 Replicative DNA helicase                             | Phage Associated Protein |
| NGO1111 | 0.0263 | -15.77 | down | putative phage associated protein\ Context:(NC_002946)-[1067844-1068974]\ Notes:Best Blastp Hit: gi 9634200 Gp54 [Bacteriophage HK97] >gi 6901629 gb AAF31132.1  (AF069529) Gp54 [Bacteriophage HK97]                                                                                                                                                                                                                                                                                       | Phage Associated Protein |
| NGO1115 | 0.0182 | -18.27 | down | putative phage associated protein\ Context:(NC_002946)-[1069893-1070081]\ Notes:                                                                                                                                                                                                                                                                                                                                                                                                            | Phage Associated Protein |
| NGO1144 | 0.0521 | -19.03 | down | putative phage associated protein\ Context:(NC_002946)-[1086190-1086393]\ Notes:Best Blastp Hit: emb CAB84063.1  (AL162754) hypothetical protein NMA0780 [Neisseria meningitidis]                                                                                                                                                                                                                                                                                                           | Phage Associated Protein |
| NGO1146 | 0.0287 | -14.56 | down | putative phage associated protein\ Context:(NC_002946)-[1086789-1088060]\ Notes:Best Blastp Hit: pir  G81922 probable phage replication protein NMA0782 [imported] - Neisseria meningitidis (group A strain Z2491) >gi 7379503 emb CAB84065.1  (AL162754) putative phage replication protein [Neisseria meningitidis]                                                                                                                                                                       | Phage Associated Protein |
| NGO1615 | 0.0191 | -8.77  | down | putative phage associated protein\ Context:(NC_002946)-[1584606-1585754]\ Notes:Best Blastp Hit: pir  I41051 hsdM protein - Escherichia coli >gi 450688 emb CAA53205.1  (X75452) hsdM gene of Ecoprrl [Escherichia coli]                                                                                                                                                                                                                                                                    | Phage Associated Protein |
| NGO1629 | 0.0501 | -3.91  | down | putative phage associated protein\ Context:(NC_002946)-[1592225-1593043]\ Notes:                                                                                                                                                                                                                                                                                                                                                                                                            | Phage Associated Protein |
| NGO1630 | 0.0357 | -5.97  | down | putative phage repressor protein; putative phage associated protein\ Context:(NC_002946)-[1593316-1594071]\ Notes:Best Blastp Hit: pdb 1LLI B Chain B; Lambda Repressor Mutant With Val 36 Replaced By Leu; Met 40 Replaced By Leu; And Val 47 Replaced By Ile (V36;M40;V47i) Complexed With Dna Operator >gi 640244 pdb 1LLI A Chain A; Lambda Repressor Mutant With Val 36 Replaced By Leu; Met 40 Replaced By Leu; And Val 47 Replaced By Ile (V36;M40;V47i) Complexed With Dna Operator | Phage Associated Protein |
| NGO1634 | 0.0096 | -17.88 | down | putative phage associated protein\ Context:(NC_002946)+[1595199-1595750]\ Notes:Best Blastp Hit: pir  S30432 hypothetical protein - Streptomyces clavuligerus plasmid pSCL                                                                                                                                                                                                                                                                                                                  | Phage Associated Protein |
| NGO1635 | 0.0225 | -13.90 | down | putative phage associated protein\ Context:(NC_002946)+[1596026-1596241]\ Notes:                                                                                                                                                                                                                                                                                                                                                                                                            | Phage Associated Protein |
| NGO1636 | 0.0265 | -5.21  | down | putative DNA replication protein; putative phage associated protein\ Context:(NC_002946)+[1596419-1597036]\ Notes:Best Blastp Hit: pir  T03011 dnaC protein homolog - Salmonella typhimurium >gi 3294483 gb AAC26072.1  (AF001386) unknown [Salmonella typhimurium] COG1484 DNA replication protein DnaC                                                                                                                                                                                    | Phage Associated Protein |
| NGO1640 | 0.0461 | -4.90  | down | putative phage associated protein\ Context:(NC_002946)+[1598474-1599049]\ Notes:Best Blastp Hit: sp Q37873 RUSA_BP82 crossover junction endodeoxyribonuclease RusA (Holliday junction nuclease RuSA) (Holliday junction resolvase) >gi 2120247 pir  S66583 crossover junction endodeoxyribonuclease (EC 3.1.22.4) rusA - phage 82 >gi 1051116 emb CAA63330.1  (X92588) Can suppress the phenotype of ruv mutants [Bacteriophage 82]                                                         | Phage Associated Protein |
| NGO1648 | 0.0099 | -17.25 | down | Irg7\ Context:(NC_002946)+[1605581-1606537]\ Notes:Best Blastp Hit: pir  E81070 pilin gene inverting protein PivNM-1A NMB1552;NMB1625 [imported] - Neisseria meningitidis (group B strain MD58) >gi 7226799 gb AAF41907.1  (AE002505) pilin gene inverting protein PivNM-1A [Neisseria meningitidis MC58] >gi 7226876 gb AAF41976.1  (AE002513) pilin gene inverting protein PivNM-1B [Neisseria meningitidis MC58]; putative invertase related gene 7; putative phage associated protein   | Phage Associated Protein |
| NGO0256 | 0.0189 | -4.07  | down | transcription antitermination protein NusB\ Context:(NC_002946)-[254447-254872]\ Notes:Regulates rRNA biosynthesis by transcriptional antitermination                                                                                                                                                                                                                                                                                                                                       | Protein Synthesis        |

|         |        |       |      |                                                                                                                                                                                                                                                                                                                                                                                                                                                                                                                                                                           |                                  |
|---------|--------|-------|------|---------------------------------------------------------------------------------------------------------------------------------------------------------------------------------------------------------------------------------------------------------------------------------------------------------------------------------------------------------------------------------------------------------------------------------------------------------------------------------------------------------------------------------------------------------------------------|----------------------------------|
| NGO0262 | 0.0251 | -2.98 | down | transcription elongation factor GreB\ Context:(NC_002946)-[261274-261765]\ Notes:necessary for efficient RNA polymerase transcription elongation past template-encoded arresting sites; arresting sites in DNA have the property of trapping a certain fraction of elongating RNA polymerases that pass through; resulting in locked ternary complexes. Cleavage of the nascent transcript by cleavage factors such as GreA or GreB allows the resumption of elongation from the new 3'terminus                                                                           | Protein Synthesis                |
| NGO0433 | 0.0046 | -8.84 | down | hypothetical protein\ Context:(NC_002946)+[426786-427709]\ Notes:Best Blastp Hit: emb CAB84348.1  (AL162755) hypothetical protein NMA1085 [Neisseria meningitidis] COG0564 Predicted pseudouridylate synthase family 2                                                                                                                                                                                                                                                                                                                                                    | Protein Synthesis                |
| NGO0940 | 0.0479 | -4.03 | down | putative tRNA delta transferase\ Context:(NC_002946)+[916655-917596]\ Notes:Best Blastp Hit: pir E81879 probable tRNA isopentenyltransferase (EC 2.5.1.8) NMA1130 [imported] - Neisseria meningitidis (group A strain Z2491) >gi 7379823 emb CAB84392.1  (AL162755) putative tRNA delta(2)-isopentenylpyrophosphate transferase [Neisseria meningitidis] COG0324 tRNA delta (2)-isopentenylpyrophosphate                                                                                                                                                                  | Protein Synthesis                |
| NGO1214 | 0.0257 | -3.57 | down | tRNA(5-methylaminomethyl-2-thiouridylate)-methyltransferase\ Context:(NC_002946)-[1164441-1165592]\ Notes:Enables the biosynthesis of the modified nucleoside 5-methylaminomethyl-2-thiouridine present in the wobble position of some tRNAs                                                                                                                                                                                                                                                                                                                              | Protein Synthesis                |
| NGO1791 | 0.0194 | -4.20 | down | glucose-inhibited division protein B\ Context:(NC_002946)-[1764129-1764752]\ Notes:probable SAM-dependent methyltransferase                                                                                                                                                                                                                                                                                                                                                                                                                                               | Protein Synthesis                |
| NGO1811 | 0.0276 | -2.77 | down | tRNA pseudouridine synthase A\ Context:(NC_002946)+[1787384-1788181]\ Notes:mediates pseudouridylation (positions 38; 39; 40) at the tRNA anticodon region which contributes to the structural stability                                                                                                                                                                                                                                                                                                                                                                  | Protein Synthesis                |
| NGO1940 | 0.0146 | -6.82 | down | hypothetical protein\ Context:(NC_002946)+[1916612-1917214]\ Notes:Best Blastp Hit: emb CAB83545.1  (AL162752) hypothetical protein NMA0237 [Neisseria meningitidis] COG0009 Putative translation factor (SUA5)                                                                                                                                                                                                                                                                                                                                                           | Protein Synthesis                |
| NGO2015 | 0.0421 | -6.71 | down | hypothetical protein\ Context:(NC_002946)+[1986403-1987260]\ Notes:Best Blastp Hit: gb AAF42384.1  (AE002556) hemK protein [Neisseria meningitidis MC58] COG0500 SAM-dependent methyltransferases                                                                                                                                                                                                                                                                                                                                                                         | Protein Synthesis                |
| NGO0060 | 0.0445 | -4.04 | down | putative sugar-phosphate transferase\ Context:(NC_002946)+[60497-61192]\ Notes:Best Blastp Hit: gb AAF42176.1  (AE002534) mannose-1-phosphate guanyltransferase-related protein [Neisseria meningitidis MC58] COG1208 Nucleoside-diphosphate-sugar                                                                                                                                                                                                                                                                                                                        | Purine and Pyrimidine Metabolism |
| NGO0263 | 0.0299 | -3.57 | down | amidophosphoribosyltransferase\ Context:(NC_002946)-[261865-263409]\ Notes:Catalyzes first step of the de novo purine nucleotide biosynthetic pathway                                                                                                                                                                                                                                                                                                                                                                                                                     | Purine and Pyrimidine Metabolism |
| NGO2080 | 0.0520 | -3.22 | down | hypothetical protein\ Context:(NC_002946)+[2059543-2060148]\ Notes:Best Blastp Hit: sp P57090 NADD_NEIMB probable nicotinate-nucleotide adenyltransferase (deamido-NAD(+) pyrophosphorylase)(deamido-NAD(+) diphosphorylase) (nicotinate mononucleotide adenyltransferase) (NAMN adenyltransferase) >gi 11278845 pir C81015 conserved hypothetical protein NMB2024 [imported] - Neisseria meningitidis (group B strain MD58) >gi 7227286 gb AAF42347.1  (AE002552) conserved hypothetical protein [Neisseria meningitidis MC58] COG1057 Predicted nucleotidyltransferases | Purine and Pyrimidine Metabolism |
| NGO0187 | 0.0428 | -7.92 | down | hypothetical protein\ Context:(NC_002946)-[188256-189374]\ Notes:Best Blastp Hit: gb AAF41032.1  (AE002416) histone deacetylase family protein [Neisseria meningitidis MC58] COG0123 Deacetylases; including yeast histone                                                                                                                                                                                                                                                                                                                                                | Replication                      |
| NGO0851 | 0.0369 | -3.21 | down | putative cell-division protein\ Context:(NC_002946)-[836257-839301]\ Notes:Best Blastp Hit: pir E81125 cell division protein FtsK NMB1067 [imported] - Neisseria meningitidis (group B strain MD58) >gi 7226307 gb AAF41463.1  (AE002457) cell division protein FtsK [Neisseria meningitidis MC58] COG1674 DNA segregation ATPase FtsK/SpolIIE and                                                                                                                                                                                                                        | Replication                      |

|         |        |        |      |                                                                                                                                                                                                                                                                                                                                                                                                                                                                                                          |                           |
|---------|--------|--------|------|----------------------------------------------------------------------------------------------------------------------------------------------------------------------------------------------------------------------------------------------------------------------------------------------------------------------------------------------------------------------------------------------------------------------------------------------------------------------------------------------------------|---------------------------|
| NGO0090 | 0.0006 | -13.01 | down | transcriptional regulator NrdR\ Context:(NC_002946)-[98397-98849]\ Notes:Best Blastp Hit: pir    A81039 conserved hypothetical protein NMB1816 [imported] - Neisseria meningitidis (group B strain MD58) >gi 7227069 gb AAF42151.1  (AE002531) conserved hypothetical protein [Neisseria meningitidis MC58] COG1327 Uncharacterized BCR                                                                                                                                                                  | Transcriptional Regulator |
| NGO0602 | 0.0069 | -8.93  | down | MerR family transcriptional regulator\ Context:(NC_002946)+[588393-588800]\ Notes:Best Blastp Hit: pir    E81097 transcription regulator; MerR family NMB1303 [imported] - Neisseria meningitidis (group B strain MD58; group A strain Z2491) >gi 7226544 gb AAF41678.1  (AE002479) transcriptional regulator; MerR family [Neisseria meningitidis MC58] >gi 7380159 emb CAB84745.1  (AL162756) putative transcriptional regulator [Neisseria meningitidis] COG0789 Predicted transcriptional regulators | Transcriptional Regulator |
| NGO1182 | 0.0131 | -3.46  | down | putative nitrogen regulatory protein P-II\ Context:(NC_002946)-[1123800-1124138]\ Notes:Best Blastp Hit: pir    B81019 nitrogen regulatory protein P-II NMB1995 [imported] - Neisseria meningitidis (group B strain MD58) >gi 7227257 gb AAF42322.1  (AE002548) nitrogen regulatory protein P-II [Neisseria meningitidis MC58] COG0347 Nitrogen regulatory protein PII                                                                                                                                   | Transcriptional Regulator |
| NGO1185 | 0.0028 | -5.86  | down | ArsR family transcriptional regulator\ Context:(NC_002946)-[1129602-1129913]\ Notes:Best Blastp Hit: pir    D70029 transcription regulator ArsR family homolog yvbA - Bacillus subtilis >gi 2635892 emb CAB15384.1  (Z99121) similar to transcriptional regulator (ArsR family) [Bacillus subtilis] COG0640 Predicted transcriptional regulators                                                                                                                                                         | Transcriptional Regulator |
| NGO1219 | 0.0399 | -3.25  | down | DeoR family transcriptional regulator\ Context:(NC_002946)-[1169664-1170437]\ Notes:Best Blastp Hit: gb AAF41915.1  (AE002506) transcriptional regulator; DeoR family [Neisseria meningitidis MC58] COG1349 Transcriptional regulators of sugar                                                                                                                                                                                                                                                          | Transcriptional Regulator |
| NGO1294 | 0.0008 | -22.04 | down | AsnC family transcriptional regulator\ Context:(NC_002946)-[1249111-1249575]\ Notes:Best Blastp Hit: pir    A81059 leucine-responsive regulatory protein NMB1650 [imported] - Neisseria meningitidis (group B strain MD58) >gi 7226901 gb AAF41999.1  (AE002515) leucine-responsive regulatory protein [Neisseria meningitidis MC58] COG1522 Transcriptional regulators; Lrp family                                                                                                                      | Transcriptional Regulator |
| NGO1360 | 0.0017 | -13.43 | down | GntR family transcriptional regulator\ Context:(NC_002946)-[1319917-1320696]\ Notes:Best Blastp Hit: emb CAB85185.1  (AL162757) GntR-family transcriptional regulator [Neisseria meningitidis] COG2186 Transcriptional regulators; FadR family                                                                                                                                                                                                                                                           | Transcriptional Regulator |
| NGO1511 | 0.0200 | -3.69  | down | putative drug resistance protein\ Context:(NC_002946)-[1477747-1479249]\ Notes:Best Blastp Hit: gb AAF08825.1 AF194079_12 (AF194079) Bcr [Neisseria meningitidis] COG0477 Permeases                                                                                                                                                                                                                                                                                                                      | Transcriptional Regulator |
| NGO0123 | 0.0520 | -4.42  | down | putative secretion protein\ Context:(NC_002946)+[134372-135646]\ Notes:Best Blastp Hit: gb AAF61809.1  (AF129811) unknown [Moraxella catarrhalis] COG1566 Multidrug resistance efflux pump                                                                                                                                                                                                                                                                                                               | Transportation            |
| NGO0198 | 0.0026 | -13.55 | down | putative transporter; ammonium\ Context:(NC_002946)-[198352-199818]\ Notes:Best Blastp Hit: possibly phase variable - 8A residue homopolymer repeat in the coding sequence (ON) COG0004 Ammonia permeases                                                                                                                                                                                                                                                                                                | Transportation            |
| NGO0377 | 0.0001 | -68.48 | down | putative transport protein\ Context:(NC_002946)-[370891-372306]\ Notes:Best Blastp Hit: pir    G81156 transporter; NadC family NMB0792 [imported] - Neisseria meningitidis (group B strain MD58) >gi 7226025 gb AAF41205.1  (AE002433) transporter; NadC family [Neisseria meningitidis MC58] COG0471 Cation transporters                                                                                                                                                                                | Transportation            |
| NGO0427 | 0.0041 | -11.22 | down | hypothetical protein\ Context:(NC_002946)-[422808-423464]\ Notes:Best Blastp Hit: emb CAB84330.1  (AL162755) putative periplasmic protein [Neisseria meningitidis] COG1101 ATPase components of various transport                                                                                                                                                                                                                                                                                        | Transportation            |

|         |        |         |      |                                                                                                                                                                                                                                                                                                                                                                                                                                                                                                                                                                                |                |
|---------|--------|---------|------|--------------------------------------------------------------------------------------------------------------------------------------------------------------------------------------------------------------------------------------------------------------------------------------------------------------------------------------------------------------------------------------------------------------------------------------------------------------------------------------------------------------------------------------------------------------------------------|----------------|
| NGO0446 | 0.0259 | -10.04  | down | putative ABC transporter\ Context:(NC_002946)-[441352-442173]\ Notes:Best Blastp Hit: pir   C81147 sulfate ABC transporter; permease protein NMB0880 [imported] - Neisseria meningitidis (group B strain MD58) >gi 7226118 gb AAF41291.1  (AE002440) sulfate ABC transporter; permease protein [Neisseria meningitidis MC58] COG0555 ABC-type cysteine/molybdate transport                                                                                                                                                                                                     | Transportation |
| NGO0529 | 0.0076 | -9.10   | down | putative high-affinity choline transport protein\ Context:(NC_002946)+[501653-503635]\ Notes:Best Blastp Hit: pir   E81839 probable transmembrane transport protein NMA1483 [imported] - Neisseria meningitidis (group A strain Z2491) >gi 7380131 emb CAB84716.1  (AL162756) putative transmembrane transport protein [Neisseria meningitidis] COG1292 Choline-glycine betaine transporter                                                                                                                                                                                    | Transportation |
| NGO0656 | 0.0075 | -14.87  | down | putative membrane transporter\ Context:(NC_002946)+[646046-647587]\ Notes:Best Blastp Hit: pir   A81850 probable integral membrane transporter NMA1574 [imported] - Neisseria meningitidis (group A strain Z2491) >gi 7380215 emb CAB84801.1  (AL162756) putative integral membrane transporter [Neisseria meningitidis] COG0477 Permeases                                                                                                                                                                                                                                     | Transportation |
| NGO0903 | 0.0247 | -31.07  | down | AgrA\ Context:(NC_002946)-[882770-884176]\ Notes:Best Blastp Hit: emb CAB84875.1  (AL162756) putative integral membrane protein [Neisseria meningitidis] COG0477 Permeases; aminoglycoside resistance efflux transporter protein                                                                                                                                                                                                                                                                                                                                               | Transportation |
| NGO0968 | 0.0299 | -3.33   | down | putative ABC transporter; permease protein; amino acid\ Context:(NC_002946)-[940182-940928]\ Notes:Best Blastp Hit: pir   A81076 amino acid ABC transporter; permease protein NMB1509 [imported] - Neisseria meningitidis (group B strain MD58; group A strain Z2491) >gi 7226752 gb AAF41865.1  (AE002500) amino acid ABC transporter; permease protein [Neisseria meningitidis MC58] >gi 7380350 emb CAB84937.1  (AL162756) putative binding-protein-dependent transport systems inner membrane protein [Neisseria meningitidis] COG0765 Amino acid ABC transporter permease | Transportation |
| NGO0974 | 0.0141 | -8.34   | down | hypothetical protein\ Context:(NC_002946)-[944685-945995]\ Notes:Best Blastp Hit: pir   B81074 transporter; probable NMB1515 [imported] - Neisseria meningitidis (group B strain MD58) >gi 7226759 gb AAF41871.1  (AE002501) transporter; putative [Neisseria meningitidis MC58]                                                                                                                                                                                                                                                                                               | Transportation |
| NGO1290 | 0.0000 | -209.10 | down | putative amino-acid transporter; sodium/alanine symporter\ Context:(NC_002946)-[1245069-1246487]\ Notes:Best Blastp Hit: pir   F81058 amino acid symporter; probable NMB1647 [imported] - Neisseria meningitidis (group B strain MD58) >gi 7226898 gb AAF41996.1  (AE002515) amino acid symporter; putative [Neisseria meningitidis MC58] COG1115 Sodium-alanine symporters                                                                                                                                                                                                    | Transportation |
| NGO1355 | 0.0007 | -21.61  | down | putative sodium dependent ion transport protein\ Context:(NC_002946)+[1314593-1315930]\ Notes:Best Blastp Hit: pir   F81050 sodium- and chloride-dependent transporter NMB1707 [imported] - Neisseria meningitidis (group B strain MD58) >gi 7226963 gb AAF42055.1  (AE002521) sodium- and chloride-dependent transporter [Neisseria meningitidis MC58] COG0733 Sodium-dependent transporters (SNF family)                                                                                                                                                                     | Transportation |
| NGO1552 | 0.0131 | -7.50   | down | putative sodium/proline symporter; proline permease\ Context:(NC_002946)+[1525688-1527205]\ Notes:Best Blastp Hit: pir   G81202 sodium/proline symporter NMB0402 [imported] - Neisseria meningitidis (group B strain MD58; group A strain Z2491) >gi 7225624 gb AAF40841.1  (AE002396) sodium/proline symporter [Neisseria meningitidis MC58] >gi 7380708 emb CAB85299.1  (AL162758) sodium/proline symporter [Neisseria meningitidis] COG0591 Na+/proline; Na+/panthothenate symporters                                                                                       | Transportation |

|         |        |        |      |                                                                                                                                                                                                                                                                                                                                                                                                                       |                |
|---------|--------|--------|------|-----------------------------------------------------------------------------------------------------------------------------------------------------------------------------------------------------------------------------------------------------------------------------------------------------------------------------------------------------------------------------------------------------------------------|----------------|
| NGO1807 | 0.0251 | -5.93  | down | putative amino-acid transporter\ Context:(NC_002946)+[1780301-1781692]\ Notes:Best Blastp Hit: pir     B81228 sodium/alanine symporter; probable NMB0177 [imported] - Neisseria meningitidis (group B strain MD58) >gi 7225396 gb AAF40634.1  (AE002375) sodium/alanine symporter; putative [Neisseria meningitidis MC58] COG1115 Sodium-alanine symporters                                                           | Transportation |
| NGO2011 | 0.0013 | -29.62 | down | putative ABC transporter; permease protein; amino acid\ Context:(NC_002946)+[1983007-1983666]\ Notes:Best Blastp Hit: pir     F81391 amino-acid ABC transporter integral membrane protein Cj0467 [imported] - Campylobacter jejuni (strain NCTC 11168) >gi 6967938 emb CAB75105.1  (AL139075) amino-acid ABC transporter integral membrane protein [Campylobacter jejuni] COG0765 Amino acid ABC transporter permease | Transportation |
| NGO2012 | 0.0030 | -59.64 | down | putative ABC transporter; permease protein; amino acid\ Context:(NC_002946)+[1983656-1984324]\ Notes:Best Blastp Hit: pir     B64666 glutamine ABC transporter; permease protein - Helicobacter pylori (strain 26695) >gi 2314329 gb AAD08216.1  (AE000623) glutamine ABC transporter; permease protein (glnP) [Helicobacter pylori 26695] COG0765 Amino acid ABC transporter permease                                | Transportation |
| NGO2073 | 0.0048 | -4.59  | down | TnaB\ Context:(NC_002946)-[2051805-2053046]\ Notes:Best Blastp Hit: pir     E81013 tryptophan transporter NMB2031 [imported] - Neisseria meningitidis (group B strain MD58) >gi 7227293 gb AAF42353.1  (AE002553) tryptophan transporter [Neisseria meningitidis MC58] COG0814 Amino acid permeases; putative tryptophan transport protein; tryptophan permease                                                       | Transportation |
| NGO2077 | 0.0012 | -40.39 | down | GntP\ Context:(NC_002946)-[2055600-2056985]\ Notes:Best Blastp Hit: pir     H81957 probable gluconate permease NMA0413 [imported] - Neisseria meningitidis (group A strain Z2491) >gi 7379163 emb CAB83712.1  (AL162753) putative gluconate permease [Neisseria meningitidis]                                                                                                                                         | Transportation |
| NGO2078 | 0.0008 | -31.01 | down | putative ABC transporter; permease protein\ Context:(NC_002946)+[2057326-2058918]\ Notes:Best Blastp Hit: gb AAF42349.1  (AE002552) ABC transporter; permease protein [Neisseria meningitidis MC58] COG1178 Uncharacterized transport system; permease                                                                                                                                                                | Transportation |
